# Supplementary material
Source: PubMed Central journal article supplement (PMC5065349)
Supplement: NIHMS2244-supplement-Supp_fig1.pdf [file NIHMS2244-supplement-Supp_fig1.pdf]

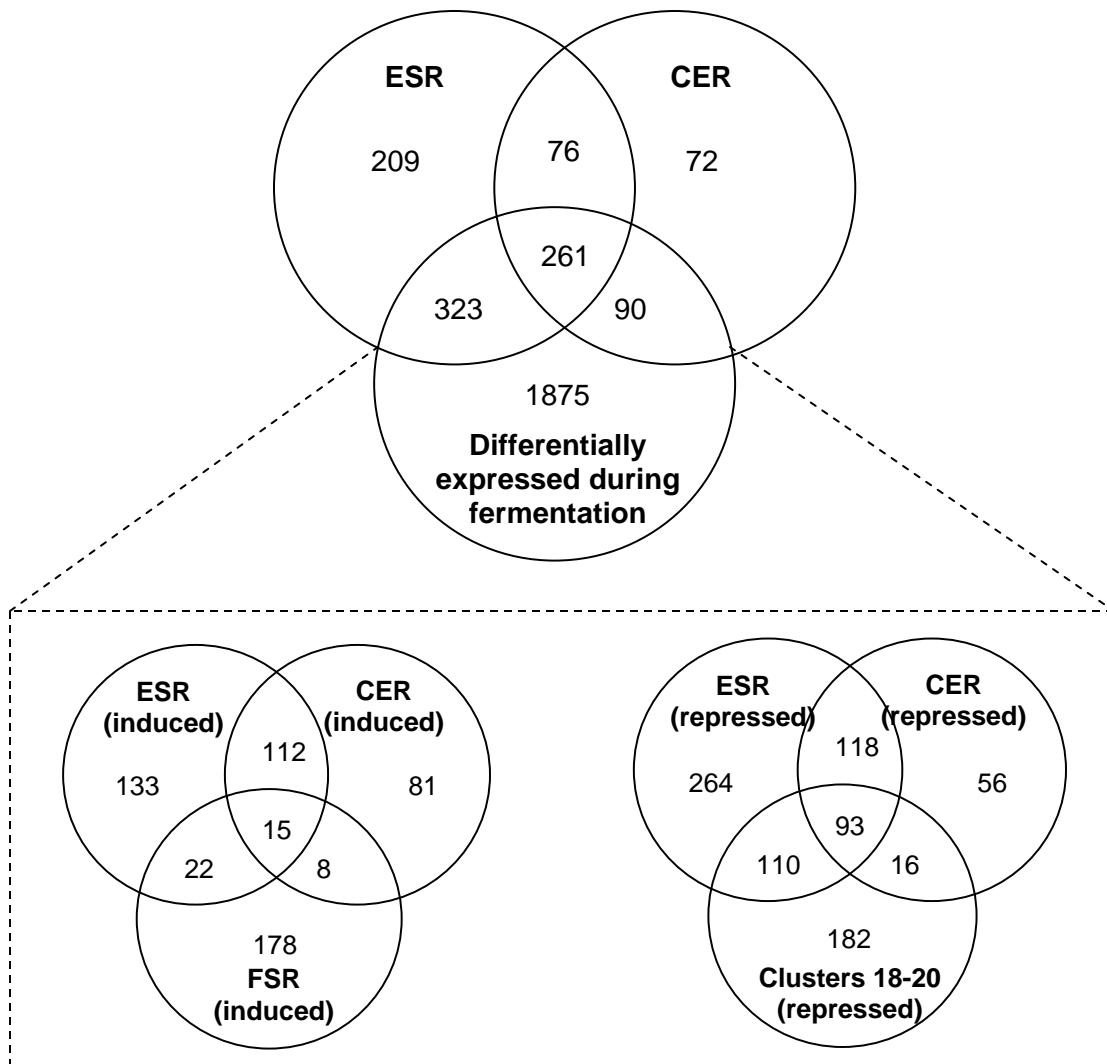

**Supplementary Figure 1:** Venn diagram showing the number of induced or repressed genes in fermentation that are associated with transcriptionally characterized stress responses. Environmental Stress Response (ESR), Common Environmental Response (CER), Fermentation Stress Response (FSR).
