# Supplementary material
Source: PubMed Central journal article supplement (PMC5065349)
Supplement: NIHMS2244-supplement-supp_table2.pdf [file NIHMS2244-supplement-supp_table2.pdf]

# Supplementary Table 2.

# Probe-set-summarized, normalized expression measures and data analysis for RNA hybridized to Affymetrix S98 arrays.

# Cells were harvested during fermentations at 0.5 %, 2 %, 3.5 %, 7 %, and 10 % (v/v) ethanol, corresponding to approximately 24 h, 48 h, 60 h, 120 h, and 340h time points, respectively.\*

# MaxFC corresponds to the expected maximum fold change during fermentation based on the model.

| PSID       | ORFName | Gene   | h-24-1   | h-24-2   | h-24-3   | h-48-1   | h-48-2   | h-48-3   | h-60-1   | h-60-2   | h-120-1  | h-120-2  | h-340-1  | h-340-2   | beta0    | beta1    | beta2    | pval     | qval    | maxFC    | cluster  |          |          |    |
|------------|---------|--------|----------|----------|----------|----------|----------|----------|----------|----------|----------|----------|----------|-----------|----------|----------|----------|----------|---------|----------|----------|----------|----------|----|
| 10000_at   | YLR331C | JIP3   | 3.12515  | 3.036698 | 3.002041 | 2.940367 | 3.188814 | 3.277543 | 3.225443 | 3.152288 | 3.522484 | 3.199458 | 3.322890 | 3.3120949 | 3.248269 | 3.233989 | 0.0764   | -0.0219  | 0.0404  | 0.005367 | 1.224634 | 13       |          |    |
| 10001_at   | YLR332W | MID2   | 6.564493 | 6.344347 | 5.840359 | 6.342838 | 6.42159  | 6.141481 | 6.690756 | 6.838154 | 6.609994 | 7.756271 | 7.476972 | 7.474456  | 7.890222 | 8.002502 | 8.010279 | 7.06483  | 0.508   | 0.00374  | 6.48E-06 | 3.42E-06 | 3.842873 | 7  |
| 10002_i_at | YLR333C | RPS25B | 10.37391 | 10.69443 | 10.78857 | 10.15851 | 10.10894 | 10.42052 | 10.11654 | 10.09465 | 9.909688 | 9.887099 | 10.07961 | 10.26492  | 9.806647 | 9.902736 | 9.403907 | 10.02309 | -0.219  | 0.0366   | 0.000619 | 0.000141 | 1.78633  | 16 |
| 10003_f_at | YLR333C | RPS25B | 11.66096 | 11.78695 | 12.32632 | 11.56706 | 11.50847 | 11.92566 | 10.98998 | 11.08223 | 11.23635 | 10.41683 | 10.51226 | 10.8408   | 10.05001 | 10.16729 | 10.34618 | 10.90526 | -0.487  | 0.0478   | 4.2E-06  | 2.45E-06 | 3.63761  | 18 |
| 10004_at   | YLR334C |        | 3.845328 | 3.811743 | 3.877186 | 3.348319 | 3.748074 | 3.619948 | 2.987059 | 3.295557 | 3.472884 | 3.219983 | 3.498821 | 3.255254  | 3.887195 | 3.631687 | 3.596124 | 3.303241 | -0.0411 | 0.131    | 0.0027   | 0.000499 | 1.467581 | 13 |
| 10005_at   | YLR335W | NUP2   | 7.018047 | 7.340295 | 7.585009 | 7.008603 | 6.98452  | 7.09783  | 6.638091 | 6.554731 | 6.811359 | 6.739094 | 6.828107 | 6.883113  | 6.381686 | 6.931367 | 6.899613 | 6.750787 | -0.14   | 0.0762   | 0.0108   | 0.001656 | 1.506599 | 16 |
| 10006_at   | YLR336C | SGD1   | 6.437953 | 6.390347 | 6.452792 | 6.219713 | 6.395822 | 6.183543 | 6.193442 | 6.390736 | 6.205687 | 6.403039 | 6.510387 | 6.278543  | 6.667255 | 6.933744 | 6.445592 | 6.308762 | 0.0749  | 0.0663   | 0.00325  | 0.000585 | 1.325825 | 13 |
| 10007_at   | YLR337C | VRP1   | 7.206262 | 7.160165 | 6.88328  | 6.796604 | 6.640113 | 6.601363 | 7.027168 | 7.087142 | 6.628199 | 6.9231   | 7.15484  | 6.707981  | 6.821593 | 7.225228 | 6.790507 | 6.827115 | -0.0111 | 0.0466   | 0.462    | 0.047451 | 1.139406 | 13 |
| 10008_at   | YLR338W | OP19   | 5.482277 | 5.38183  | 5.845227 | 5.301667 | 5.284939 | 5.614565 | 6.066275 | 6.217472 | 6.580389 | 7.026583 | 7.213042 | 6.000738  | 8.325422 | 8.957255 | 7.167284 | 6.270444 | 0.716   | 0.153    | 4.05E-05 | 1.45E-05 | 6.674183 | 6  |
| 10009_at   | YLR339C |        | 6.010409 | 6.030403 | 6.211555 | 4.836527 | 5.396182 | 5.387931 | 5.423493 | 5.062078 | 5.362956 | 5.131841 | 5.15313  | 4.69084   | 4.948197 | 5.056501 | 4.798545 | 5.008122 | -0.28   | 0.133    | 5.95E-05 | 1.99E-05 | 2.166962 | 14 |
| 10010_at   | YLR295C | ATP14  | 8.063923 | 7.925562 | 8.350645 | 9.592196 | 9.476572 | 9.680487 | 9.762833 | 9.366475 | 9.767518 | 8.69993  | 8.616666 | 9.129649  | 7.353175 | 7.720304 | 7.759138 | 9.431265 | -0.213  | -0.42    | 2.27E-05 | 9.09E-06 | 3.788076 | 15 |
| 10011_at   | YLR296W |        | 3.453751 | 3.505034 | 3.122441 | 3.643505 | 3.659003 | 4.649954 | 4.613967 | 4.392501 | 4.273872 | 4.059498 | 4.182292 | 4.542306  | 3.367968 | 3.392226 | 3.391033 | 3.335933 | -0.0207 | -0.0579  | 0.204    | 0.022761 | 1.183555 | 13 |
| 10012_at   | YLR297W |        | 7.152442 | 6.875082 | 7.448497 | 8.427888 | 8.124804 | 8.314575 | 8.346429 | 8.541955 | 8.580595 | 8.972859 | 8.922683 | 9.298536  | 9.918794 | 9.549161 | 9.633674 | 8.877099 | 0.627   | -0.11    | 5.73E-08 | 1.18E-07 | 5.264271 | 6  |
| 10013_at   | YLR298C | YHC1   | 5.691258 | 5.784666 | 5.585455 | 6.027752 | 6.127216 | 5.554206 | 6.069468 | 6.251685 | 6.659859 | 6.503024 | 6.170624 | 6.126352  | 6.169198 | 6.822231 | 6.355059 | 6.217476 | 0.171   | -0.0658  | 0.00296  | 0.000538 | 1.571686 | 9  |
| 10014_at   | YLR299W | ECM38  | 7.288739 | 7.196748 | 7.154277 | 7.661997 | 7.561666 | 7.553033 | 8.302313 | 8.011383 | 8.078117 | 8.728863 | 8.158133 | 8.581452  | 8.01912  | 8.403514 | 8.237544 | 8.264994 | 0.297   | -0.158   | 3.69E-05 | 1.35E-05 | 2.352378 | 9  |
| 10015_at   | YLR300W | EXG1   | 10.3509  | 10.40859 | 10.44986 | 10.55113 | 10.33717 | 10.52638 | 10.4711  | 9.63075  | 9.433612 | 9.520244 | 9.930262 | 8.790283  | 9.200283 | 9.206076 | 10.02964 | 10.02964 | -0.397  | -0.0798  | 2.19E-05 | 8.81E-06 | 2.863154 | 16 |
| 10016_at   | YLR301W |        | 10.40669 | 10.33733 | 10.39757 | 9.692034 | 9.710733 | 9.676166 | 9.084144 | 8.927689 | 9.351856 | 8.727213 | 8.825381 | 8.858629  | 8.941392 | 8.790552 | 8.71232  | 8.969019 | -0.421  | 0.176    | 3.61E-08 | 8.79E-08 | 3.054368 | 14 |
| 10017_at   | YLR302C |        | 4.43556  | 4.299523 | 4.694857 | 4.066584 | 4.123761 | 4.626529 | 3.872461 | 4.031798 | 4.326473 | 4.013429 | 4.287506 | 3.82364   | 4.432575 | 4.595943 | 4.738651 | 4.071641 | 0.0152  | 0.129    | 0.0117   | 0.001783 | 1.386936 | 13 |
| 10018_at   | YLR303W | MET17  | 11.73051 | 11.79653 | 11.81085 | 11.92748 | 11.83925 | 12.28112 | 11.34285 | 11.39524 | 12.09088 | 10.89737 | 11.07693 | 11.11621  | 10.75336 | 11.00075 | 11.01336 | 11.43346 | -0.283  | -0.0137  | 0.00249  | 0.000465 | 2.173739 | 16 |
| 10019_at   | YLR304C | ACO1   | 9.510351 | 9.72512  | 9.716946 | 10.1522  | 10.1056  | 9.986147 | 10.0677  | 9.927753 | 10.62762 | 9.001995 | 9.960483 | 9.781298  | 8.203526 | 8.367021 | 8.808703 | 9.78677  | -0.368  | -0.195   | 0.000185 | 5.08E-05 | 3.012563 | 15 |
| 10020_at   | YLR305C | STT4   | 6.170398 | 6.301473 | 6.781346 | 6.269355 | 5.963394 | 6.589007 | 6.026221 | 5.965444 | 6.237344 | 5.86834  | 5.959631 | 6.855185  | 5.800148 | 5.930056 | 6.479781 | 6.152233 | -0.0955 | 0.0146   | 0.436    | 0.045001 | 1.62233  | 13 |
| 10021_at   | YLR306W | UBC12  | 5.752446 | 5.870877 | 6.632582 | 6.054148 | 5.985173 | 6.043202 | 5.672329 | 5.423585 | 6.655061 | 5.249666 | 4.906418 | 4.542306  | 4.574216 | 4.898465 | 4.75352  | 5.455318 | -0.378  | -0.006   | 7.32E-05 | 2.37E-05 | 2.725828 | 16 |
| 10022_at   | YLR307W | CDA1   | 3.870802 | 3.682099 | 5.120142 | 3.900995 | 4.003679 | 4.849954 | 4.613967 | 4.392501 | 4.273872 | 4.059498 | 4.182292 | 4.542306  | 3.367968 | 3.392226 | 3.391033 | 3.335933 | -0.074  | -0.0448  | 0.531    | 0.053657 | 1.257952 | 13 |
| 10023_at   | YLR308W | CDA2   | 4.252506 | 4.343395 | 5.41366  | 3.956379 | 4.368929 | 4.508075 | 4.349348 | 4.043729 | 4.051446 | 4.250735 | 4.206301 | 3.987811  | 3.940549 | 4.193667 | 4.041345 | 4.110046 | -0.146  | 0.0684   | 0.0695   | 0.008715 | 1.49323  | 16 |
| 10024_at   | YLR309C | IMH1   | 7.351363 | 7.214553 | 7.613316 | 7.176717 | 7.285447 | 6.645369 | 7.137239 | 7.22569  | 6.035484 | 7.045361 | 6.945833 | 7.027777  | 7.235355 | 6.984378 | 6.979715 | 7.011949 | -0.0778 | 0.0576   | 0.0602   | 0.007664 | 1.302541 | 13 |
| 10025_at   | YLR310C | CDC25  | 4.418519 | 3.881851 | 5.103557 | 3.921813 | 4.425067 | 4.129411 | 4.685798 | 4.443854 | 4.546693 | 4.799523 | 4.430529 | 4.790214  | 5.017713 | 4.196815 | 4.572125 | 4.504914 | 0.069   | 0.000624 | 0.662    | 0.065518 | 1.200638 | 13 |
| 10026_at   | YLR311C |        | 5.210964 | 4.756795 | 5.672966 | 5.063017 | 5.110276 | 5.156848 | 5.460829 | 5.227179 | 5.279445 | 5.697271 | 5.318177 | 5.509077  | 5.376688 | 5.477106 | 5.695809 | 5.362878 | 0.124   | 0.00926  | 0.692    | 0.008689 | 1.389499 | 13 |
| 10027_at   | YLR312C | QNQ1   | 4.775121 | 4.442141 | 5.188679 | 6.03533  | 5.983851 | 5.335825 | 7.759809 | 7.119881 | 7.110277 | 7.692839 | 7.592929 | 7.687605  | 5.717152 | 5.349002 | 7.420081 | 7.382489 | 0.728   | -0.36    | 1.05E-05 | 4.95E-06 | 7.693054 | 4  |
| 10028_at   | YLR313C | SPH1   | 6.59816  | 6.472843 | 6.59126  | 6.365449 | 6.066882 | 6.091862 | 6.368908 | 6.094869 | 6.244208 | 6.414341 | 6.216968 | 5.661404  | 5.703996 | 5.801491 | 5.334181 | 6.196049 | -0.23   | -0.032   | 0.000221 | 5.88E-05 | 1.841863 | 16 |
| 10029_at   | YLR314C | CDC3   | 5.571723 | 5.906349 | 6.697288 | 6.652159 | 5.631215 | 5.324068 | 5.620119 | 5.381908 | 5.420676 | 5.491189 | 5.648926 | 5.536553  | 4.894861 | 5.008247 | 4.960338 | 5.436388 | -0.249  | 0.0147   | 0.00455  | 0.000787 | 1.937288 | 16 |
| 10030_at   | YLR315W | NKP2   | 5.531695 | 4.865068 | 5.096138 | 4.614951 | 4.620276 | 4.584681 | 5.560344 | 5.095925 | 5.20219  | 4.912859 | 5.215291 | 4.799203  | 3.975089 | 4.178376 | 4.177936 | 4.939889 | -0.229  | -0.0931  | 0.00751  | 0.001212 | 1.879068 | 15 |
| 10031_at   | YLR316C | TAD3   | 7.234374 | 6.990183 | 7.181966 | 6.332771 | 6.447763 | 6.192797 | 6.308153 | 6.530963 | 6.208953 | 6.209929 | 6.306424 | 5.844007  | 5.832555 | 5.822528 | 5.467194 | 6.122365 | -0.346  | 0.0773   | 5.48E-06 | 2.99E-06 | 2.510339 | 16 |
| 10032_at   | YLR274W | CDC46  | 5.160472 | 5.128609 | 5.666755 | 4.876943 | 5.09195  | 4.869799 | 5.010771 | 4.557455 | 4.77136  | 4.658782 | 4.613013 | 4.311536  | 4.511727 | 4.752794 | 4.154476 | 4.633058 | -0.0227 | 0.0729   | 0.000618 | 0.000141 | 1.825709 | 16 |
| 10033_at   | YLR275W | SMD2   | 5.57374  | 5.310164 | 6.119792 | 5.435158 | 5.441969 | 5.23155  | 5.403641 | 5.10963  | 5.321775 | 5.197433 | 5.497919 | 5.343378  | 5.793226 | 5.418267 | 5.451539 | 5.371146 | -0.0292 | 0.0631   | 0.337    | 0.03507  | 1.170302 | 13 |
| 10034_at   | YLR276C | YDH9   | 7.499923 | 7.772535 | 7.71479  | 6.927902 | 7.092482 | 6.64602  | 6.697935 | 6.71022  | 6.43034  | 6.714538 | 6.391984 | 5.760346  | 6.54703  | 6.190747 | 5.723389 | 6.390064 | -0.391  | 0.142    | 5.05E-05 | 1.74E-05 | 2.819883 | 14 |
| 10035_at   | YLR277C | BSB1   | 8.580519 | 5.917259 | 6.505209 | 5.857753 | 5.931297 | 5.851494 | 5.553161 | 5.764774 | 5.542099 | 5.726367 | 5.841409 | 5.991284  | 5.       |          |          |          |         |          |          |          |          |    |

|            |         |        |          |          |          |          |          |          |          |          |          |          |          |          |          |          |          |          |          |          |          |          |          |    |
|------------|---------|--------|----------|----------|----------|----------|----------|----------|----------|----------|----------|----------|----------|----------|----------|----------|----------|----------|----------|----------|----------|----------|----------|----|
| 10067_at   | YLR263W | RED1   | 5.392258 | 5.066116 | 4.906388 | 5.187781 | 5.133345 | 5.32461  | 4.962315 | 5.241489 | 5.256835 | 5.020533 | 5.304499 | 4.770914 | 5.008834 | 5.145854 | 4.874035 | 5.119309 | -0.0426  | -0.0128  | 0.466    | 0.047777 | 1.119635 | 13 |
| 10068_i_at | YLR264W | RPS28B | 12.02907 | 11.48031 | 11.45027 | 11.0378  | 11.08292 | 11.21872 | 11.08093 | 10.7324  | 10.46599 | 9.287473 | 9.422019 | 8.557569 | 7.53374  | 7.476897 | 7.302936 | 9.890091 | -1.16    | -0.0871  | 2.58E-09 | 1.74E-08 | 21.61925 | 20 |
| 10069_f_at | YLR264W | RPS28B | 10.7842  | 10.30457 | 10.3367  | 10.01002 | 10.07843 | 10.18213 | 9.809439 | 9.727722 | 9.528475 | 8.710131 | 9.24688  | 8.368083 | 7.035026 | 7.12867  | 6.588364 | 9.038491 | -0.982   | -0.087   | 6.71E-09 | 2.98E-08 | 13.52357 | 20 |
| 10070_at   | YLR265C | NEJ1   | 3.48561  | 3.437865 | 3.267473 | 3.364556 | 3.230133 | 3.121693 | 3.166307 | 3.171614 | 3.347531 | 3.252744 | 3.945588 | 3.120483 | 3.782729 | 3.731484 | 3.300697 | 3.230734 | 0.0456   | 0.0747   | 0.0136   | 0.002031 | 1.2845   | 13 |
| 10071_at   | YLR266C | PDR8   | 4.61004  | 4.396762 | 4.048402 | 4.326628 | 4.50045  | 4.463793 | 4.491434 | 4.271362 | 4.531758 | 4.591167 | 4.420876 | 4.496762 | 4.561348 | 4.905366 | 4.492554 | 4.536526 | 0.0722   | -0.00953 | 0.155    | 0.017784 | 1.210791 | 13 |
| 10072_at   | YLR267W | BOP2   | 9.31053  | 3.864232 | 3.641904 | 4.074735 | 3.953026 | 4.074974 | 3.875629 | 4.038832 | 4.321419 | 4.22913  | 4.202076 | 4.375183 | 4.238857 | 4.402852 | 4.172022 | 4.180304 | 0.123    | -0.0381  | 0.00189  | 0.000367 | 1.383913 | 13 |
| 10073_at   | YLR268W | SEC22  | 6.915198 | 6.743896 | 6.917033 | 6.688237 | 6.644509 | 6.864183 | 6.18352  | 5.97777  | 6.473408 | 5.772645 | 5.897519 | 6.328316 | 5.198438 | 5.690504 | 5.57725  | 6.164513 | -0.373   | 0.00706  | 0.000025 | 9.77E-06 | 2.684624 | 16 |
| 10074_at   | YLR269C |        | 3.688797 | 3.563206 | 3.864397 | 3.493711 | 3.569876 | 4.202416 | 3.111344 | 3.469639 | 3.6007   | 3.341966 | 3.653159 | 3.549705 | 3.358684 | 3.687981 | 3.694176 | 3.514352 | -0.0408  | 0.0385   | 0.519    | 0.005247 | 1.172069 | 13 |
| 10075_at   | YLR270W | DCS1   | 7.369234 | 7.635072 | 7.319992 | 8.499961 | 8.120426 | 8.061809 | 8.363452 | 8.431501 | 8.74612  | 7.910216 | 8.115443 | 8.356493 | 7.646981 | 7.691575 | 8.008009 | 8.395624 | 0.0503   | -0.211   | 0.00119  | 0.000246 | 1.807991 | 12 |
| 10076_at   | YLR271W |        | 5.872501 | 5.543461 | 5.886436 | 5.6001   | 5.467683 | 5.805132 | 5.245112 | 5.464775 | 5.427393 | 5.087716 | 4.964917 | 4.914595 | 5.158937 | 5.368617 | 5.159869 | 5.218743 | -0.175   | 0.0813   | 0.000873 | 0.000189 | 1.613097 | 16 |
| 10077_at   | YLR272C | YCS4   | 4.466712 | 4.611535 | 5.055987 | 4.132064 | 4.257644 | 4.50213  | 3.884286 | 4.157078 | 4.100841 | 3.815576 | 4.027344 | 4.14094  | 3.531032 | 4.206043 | 3.740302 | 3.998356 | -0.223   | 0.074    | 0.00114  | 0.000238 | 1.8054   | 16 |
| 10078_at   | YLR273C | PIG1   | 5.83812  | 5.657447 | 6.153087 | 6.004956 | 6.005582 | 5.885509 | 5.902212 | 5.836914 | 6.091349 | 5.592916 | 5.731818 | 5.524338 | 5.344021 | 5.395811 | 5.187136 | 5.800011 | -0.168   | -0.0539  | 0.000196 | 5.34E-05 | 1.561663 | 16 |
| 10079_at   | YLR232W |        | 4.612451 | 4.237587 | 3.94712  | 4.382967 | 4.447815 | 4.558931 | 4.237638 | 4.513436 | 4.706434 | 4.212686 | 4.676247 | 3.937837 | 4.331344 | 4.389121 | 4.22048  | 4.413329 | -0.00939 | -0.0315  | 0.72     | 0.070657 | 1.092565 | 13 |
| 10080_at   | YLR233C | EST1   | 4.461795 | 4.323008 | 3.945121 | 4.153073 | 4.006879 | 4.55369  | 4.156383 | 4.17322  | 4.508573 | 4.215409 | 4.259858 | 4.138097 | 3.935241 | 4.153351 | 3.989214 | 4.233786 | -0.0558  | -0.0276  | 0.229    | 0.025244 | 1.17725  | 13 |
| 10081_at   | YLR234W | TOP3   | 4.461946 | 3.973958 | 3.756306 | 4.174542 | 3.915962 | 4.247344 | 3.970251 | 4.444984 | 4.302328 | 4.397618 | 3.800507 | 4.297049 | 4.97707  | 4.546197 | 4.527017 | 4.202142 | 0.147    | 0.0478   | 0.03     | 0.004108 | 1.475849 | 13 |
| 10082_at   | YLR235C |        | 5.311617 | 5.153261 | 4.66673  | 4.772491 | 4.569476 | 4.94746  | 4.735809 | 4.865754 | 4.952673 | 4.955891 | 4.818654 | 4.592743 | 4.832433 | 4.885741 | 4.937275 | 4.770256 | -0.0336  | 0.0513   | 0.229    | 0.025202 | 1.195125 | 13 |
| 10083_g_e  | YLR235C |        | 5.013153 | 5.097129 | 5.072524 | 4.802539 | 4.902523 | 5.2845   | 5.002824 | 5.057961 | 5.095375 | 5.049099 | 5.019165 | 4.675128 | 4.790959 | 4.993547 | 4.856721 | 4.939988 | -0.0569  | 0.00889  | 0.242    | 0.026493 | 1.162693 | 13 |
| 10084_at   | YLR236C |        | 6.497448 | 6.198205 | 6.515615 | 6.537099 | 6.43636  | 6.530733 | 5.944272 | 6.035921 | 6.272938 | 6.086237 | 6.305165 | 5.920515 | 6.255669 | 6.07835  | 5.98353  | 6.178585 | -0.0935  | 0.0254   | 0.0964   | 0.011662 | 1.281303 | 16 |
| 10085_at   | YLR237W | THI7   | 9.137864 | 8.916239 | 8.608053 | 8.863202 | 10.12892 | 9.994472 | 10.26356 | 10.1867  | 10.46672 | 9.489956 | 9.007408 | 9.073136 | 9.765575 | 9.300043 | 9.61409  | 9.908401 | 0.0606   | -0.176   | 0.149    | 0.017199 | 1.68839  | 12 |
| 10086_at   | YLR238W | FAR10  | 4.613043 | 4.534505 | 5.054665 | 4.592353 | 4.302277 | 4.56772  | 4.256259 | 4.602625 | 4.365185 | 4.921967 | 4.607799 | 4.841025 | 5.452573 | 5.626109 | 5.415928 | 4.589983 | 0.212    | 0.141    | 3.17E-05 | 1.19E-05 | 1.996632 | 8  |
| 10087_at   | YLR239C | LIP2   | 5.843444 | 5.737011 | 5.99954  | 6.210855 | 6.265603 | 6.077837 | 6.078639 | 6.120181 | 6.007858 | 5.90495  | 5.483204 | 5.978085 | 5.51944  | 5.35858  | 4.773192 | 5.961948 | -0.224   | -0.129   | 2.82E-05 | 1.08E-05 | 1.99703  | 15 |
| 10088_at   | YLR240W | VPS34  | 5.60823  | 5.370769 | 5.692892 | 5.485423 | 5.550719 | 5.561087 | 5.660582 | 5.572563 | 5.752506 | 5.279145 | 5.53907  | 5.79922  | 5.284907 | 5.465654 | 5.602716 | 5.579396 | -0.0282  | -0.0215  | 0.449    | 0.046296 | 1.103227 | 13 |
| 10089_at   | YLR241W |        | 7.329961 | 7.345667 | 7.40739  | 7.48122  | 7.428099 | 7.648012 | 7.358457 | 7.048883 | 7.195952 | 6.883236 | 7.076827 | 7.66531  | 6.970688 | 7.799697 | 7.378675 | 7.279525 | -0.0153  | 0.0298   | 0.792    | 0.077139 | 1.101574 | 13 |
| 10090_at   | YLR242C | ARV1   | 5.173413 | 5.271522 | 5.596247 | 5.068183 | 5.099551 | 5.816749 | 4.698559 | 4.818729 | 4.701915 | 4.393128 | 4.578023 | 4.659258 | 4.345653 | 4.09271  | 4.642382 | 4.00721  | 0.0131   | 1.43E-05 | 6.23E-06 | 2.433751 | 16       |    |
| 10091_at   | YLR243W |        | 8.853797 | 8.729066 | 8.337597 | 8.521379 | 8.657255 | 8.980959 | 8.161257 | 8.254007 | 8.305259 | 8.25745  | 8.024969 | 7.459353 | 6.797204 | 6.730135 | 6.547296 | 8.061843 | -0.499   | -0.109   | 6.96E-07 | 6.44E-07 | 3.753004 | 17 |
| 10092_at   | YLR244C | MAP1   | 7.075084 | 7.433166 | 8.179351 | 7.349983 | 7.797135 | 7.353586 | 6.991536 | 7.407875 | 7.074875 | 7.271774 | 7.099408 | 7.988597 | 7.212215 | 7.519403 | 7.711284 | 7.383309 | -0.0168  | 0.0393   | 0.791    | 0.077042 | 1.129644 | 13 |
| 10093_at   | YLR245C | DD1    | 6.125252 | 6.006213 | 6.254197 | 5.788769 | 5.919058 | 6.141817 | 6.301769 | 6.24354  | 6.606866 | 6.338045 | 6.665127 | 6.240673 | 5.994883 | 6.091499 | 6.252342 | 6.300305 | 0.0274   | -0.0555  | 0.342    | 0.036099 | 1.195219 | 13 |
| 10094_at   | YLR246W | ERF2   | 6.675067 | 7.001219 | 7.495727 | 7.061744 | 7.235357 | 6.921603 | 7.059148 | 7.165432 | 7.28974  | 7.186422 | 7.182357 | 7.07235  | 6.408818 | 6.814014 | 6.475806 | 7.135947 | -0.113   | -0.0911  | 0.00811  | 0.001297 | 1.499048 | 12 |
| 10095_at   | YLR247C | IRC20  | 5.598056 | 5.548251 | 5.907678 | 5.792493 | 5.921318 | 5.568375 | 6.714617 | 6.525767 | 6.216374 | 6.078997 | 7.613806 | 7.716162 | 6.953693 | 6.888623 | 8.821019 | 7.0237   | 0.059    | 0.0772   | 2.44E-07 | 3.04E-07 | 12.40461 | 6  |
| 10096_at   | YLR248W | RCK2   | 8.979984 | 8.834414 | 9.33625  | 9.250673 | 9.338237 | 9.083888 | 8.676051 | 9.400737 | 9.687825 | 10.15566 | 9.885848 | 9.802367 | 9.636665 | 9.886267 | 9.821307 | 9.732273 | 0.208    | -0.101   | 0.000788 | 0.000173 | 1.785274 | 9  |
| 10097_at   | YLR249W | YEF3   | 12.24047 | 12.3414  | 12.35406 | 12.50014 | 12.5367  | 12.48879 | 12.54224 | 12.08205 | 12.54601 | 12.61109 | 12.42472 | 12.70986 | 12.33461 | 12.11736 | 12.09365 | 12.51836 | -0.0236  | -0.0743  | 0.0309   | 0.004225 | 1.235242 | 13 |
| 10098_at   | YLR250W | RSP120 | 6.281381 | 5.932716 | 6.770854 | 5.975373 | 6.008387 | 6.556616 | 6.171052 | 5.494237 | 5.689171 | 6.096802 | 5.79628  | 5.899098 | 6.217146 | 5.978381 | 5.811289 | 5.789577 | -0.0589  | 0.0997   | 0.121    | 0.014249 | 1.39923  | 13 |
| 10099_at   | YLR251W | SYM1   | 7.605562 | 7.156118 | 7.196286 | 8.781527 | 8.66053  | 8.091004 | 8.971037 | 8.350564 | 8.926763 | 7.919417 | 7.9103   | 8.013455 | 8.016232 | 7.380984 | 7.296096 | 8.502365 | -0.019   | -0.282   | 0.00684  | 0.001121 | 2.016179 | 12 |
| 10100_at   | YLR252W |        | 6.780247 | 6.610009 | 7.12637  | 8.434504 | 8.391151 | 8.06306  | 8.112736 | 7.768372 | 8.282888 | 6.983845 | 7.552488 | 7.948402 | 7.964672 | 7.769689 | 7.345466 | 8.004304 | 0.109    | -0.201   | 0.0731   | 0.000910 | 1.939319 | 12 |
| 10101_at   | YLR209C | PNP1   | 7.410629 | 7.618253 | 8.093732 | 7.543391 | 7.457198 | 7.913444 | 7.643474 | 6.886464 | 7.157352 | 6.433268 | 6.850805 | 7.090086 | 6.011465 | 6.882556 | 6.579756 | 6.958006 | -0.341   | 0.0455   | 0.00191  | 0.00037  | 2.471702 | 16 |
| 10102_at   | YLR210W | CLB4   | 6.246562 | 6.104819 | 6.423194 | 5.848024 | 6.181952 | 5.915642 | 5.567292 | 5.582196 | 5.533187 | 5.938103 | 5.853602 | 5.579555 | 5.417919 | 5.915749 | 5.134402 | 5.687199 | -0.182   | 0.0514   | 0.0118   | 0.001797 | 1.620108 | 16 |
| 10103_at   | YLR211C |        | 6.778168 | 6.482756 | 6.58004  | 6.673876 | 6.5831   | 6.143326 | 6.569978 | 6.546949 | 6.422697 | 6.798512 | 6.395961 | 6.029519 | 5.931434 | 5.954927 | 5.16477  | 6.418801 | -0.257   | -0.0954  | 0.000625 | 0.000142 | 1.993554 | 15 |
| 10104_at   | YLR212C | TUB4   | 5.822584 | 6.232638 | 6.858686 | 6.002403 | 5.942367 | 6.059751 | 5.453234 | 5.031869 | 5.128756 | 4.717163 | 4.511828 | 4.82567  | 4.295161 | 4.837368 | 4.645375 | 5.039328 | -0.492   | 0.123    | 6.94E-05 | 2.26E-05 | 3.685504 | 18 |
| 10105_at   | YLR213C | CRR1   | 8.955736 | 3.885781 | 5.051225 | 4.217773 | 4.340797 | 4.129831 | 4.670423 | 4.740803 | 4.300454 | 4.010598 | 4.607994 | 4.697763 | 4.523884 | 4.389795 | 4.158822 | 4.563156 | 0.0453   | -0.0688  | 0.408    | 0.042427 | 1.270221 | 13 |
| 10106_at   | YLR214W | FRE1   | 5.339816 | 4.92347  | 5.374031 | 5.630064 | 5.792336 | 4.966174 | 5.721456 | 6.028272 | 5.328717 | 5.475255 | 5.404483 | 5.350603 | 5.456364 | 5.411166 | 4.337654 | 5.543371 | -0.191   | -0.193   | 0.000248 | 6.51E-05 | 2.167454 | 15 |
| 10107_at   | YLR215C | CDC123 | 5.409851 | 5.544563 | 6.072303 | 5.859859 | 5.727791 | 5.414652 | 5.574049 | 5.175719 | 5        |          |          |          |          |          |          |          |          |          |          |          |          |    |

|           |         |          |          |          |          |          |          |          |          |          |          |          |          |          |          |           |          |           |         |          |          |          |          |    |
|-----------|---------|----------|----------|----------|----------|----------|----------|----------|----------|----------|----------|----------|----------|----------|----------|-----------|----------|-----------|---------|----------|----------|----------|----------|----|
| 10139_i_a | YLR202C | 9.470559 | 9.747132 | 9.724841 | 10.35477 | 10.2023  | 10.17439 | 10.61377 | 10.38212 | 10.49666 | 10.66415 | 10.53376 | 11.19009 | 10.84276 | 11.31505 | 11.04774  | 10.74243 | 0.356     | -0.103  | 1.32E-05 | 5.87E-06 | 2.56862  | 7        |    |
| 10140_r_a | YLR202C | 8.483645 | 8.812076 | 8.592127 | 9.300365 | 9.124247 | 9.404443 | 9.21885  | 9.201887 | 9.208983 | 9.11901  | 9.208684 | 10.07457 | 9.457049 | 9.905113 | 9.688241  | 9.437853 | 0.259     | -0.0738 | 0.00106  | 0.00223  | 1.986591 | 9        |    |
| 10141_at  | YLR203C | MSS51    | 8.098755 | 8.789747 | 7.027312 | 8.596819 | 8.187634 | 8.762361 | 8.709265 | 8.863558 | 9.806299 | 8.554826 | 8.780219 | 9.28991  | 8.466498 | 8.643185  | 8.758771 | 0.233     | -0.212  | 0.001    | 0.000213 | 2.432975 | 9        |    |
| 10142_at  | YLR204W | OR15     | 8.493906 | 8.418303 | 9.333787 | 9.506332 | 9.125504 | 8.58137  | 8.883148 | 9.243037 | 9.208285 | 9.454534 | 9.21312  | 9.409244 | 9.461984 | 9.478776  | 9.259631 | 0.149     | -0.0749 | 0.043    | 0.005674 | 1.523883 | 13       |    |
| 10143_at  | YLR205C | HMX1     | 6.711523 | 6.481196 | 6.38733  | 6.454718 | 6.517519 | 6.29646  | 7.002388 | 7.746678 | 6.924366 | 6.88791  | 8.045917 | 7.422011 | 7.440484 | 7.923979  | 7.161534 | 0.356     | -0.137  | 0.0149   | 0.002206 | 2.570257 | 9        |    |
| 10144_at  | YLR206W | ENT5     | 8.599597 | 8.219827 | 7.06675  | 8.870948 | 8.600692 | 8.207565 | 8.716503 | 8.859256 | 8.811618 | 9.205619 | 8.866989 | 8.802692 | 8.32369  | 8.6001197 | 8.110982 | 8.8883295 | 0.0341  | -0.158   | 0.00529  | 0.000986 | 1.549179 | 12 |
| 10145_at  | YLR207W | HRD3     | 5.961752 | 6.092281 | 6.465174 | 6.111883 | 5.947713 | 6.394625 | 6.346747 | 6.040165 | 6.18115  | 6.307588 | 5.753063 | 6.331645 | 6.121634 | 6.552858  | 6.228612 | 6.15635   | 0.0276  | 0.0224   | 0.672    | 0.066425 | 1.104403 | 13 |
| 10146_at  | YLR208W | SEC13    | 10.41793 | 10.04466 | 9.985148 | 9.877778 | 9.846666 | 9.751294 | 9.651534 | 9.493305 | 9.67886  | 9.158857 | 9.348727 | 9.025679 | 9.140516 | 8.9855    | 8.566358 | 9.392245  | -0.344  | 0.0384   | 3.92E-06 | 2.33E-06 | 2.490165 | 16 |
| 10147_at  | YLR167W | RPS31    | 12.10232 | 12.20617 | 12.6035  | 12.03358 | 12.0755  | 12.4444  | 11.93361 | 11.881   | 11.88052 | 11.71102 | 11.11684 | 11.5749  | 11.00995 | 11.65351  | 11.23531 | 11.72077  | -0.292  | 0.0267   | 0.000461 | 0.00011  | 2.16838  | 16 |
| 10148_at  | YLR168C |          | 6.933022 | 6.513066 | 5.491201 | 8.635293 | 8.426015 | 7.183674 | 9.522908 | 9.348793 | 8.706533 | 10.54026 | 9.87458  | 10.0052  | 10.27538 | 10.33852  | 9.953513 | 9.719568  | 1.04    | -0.409   | 1.21E-06 | 9.76E-07 | 15.82818 | 4  |
| 10149_at  | YLR169W |          | 6.734917 | 6.627161 | 6.79323  | 6.318753 | 6.203749 | 6.400806 | 6.775898 | 6.250655 | 6.300765 | 5.71999  | 5.886008 | 5.597954 | 5.920267 | 6.095203  | 5.968018 | 5.910799  | -0.211  | 0.125    | 3.42E-05 | 1.27E-05 | 1.897473 | 14 |
| 10150_at  | YLR170C | APS1     | 7.792932 | 7.454237 | 7.032061 | 7.125986 | 7.088515 | 6.951308 | 7.149399 | 7.081401 | 6.823066 | 5.939631 | 6.113174 | 5.964907 | 5.674299 | 5.95546   | 5.483852 | 6.492033  | -0.496  | 0.024    | 6.24E-06 | 3.33E-06 | 3.722371 | 18 |
| 10151_at  | YLR171W |          | 6.23427  | 6.058979 | 5.557058 | 5.732034 | 5.634822 | 5.664863 | 5.793888 | 5.530258 | 5.946086 | 5.694352 | 5.048087 | 5.62047  | 6.787134 | 6.430837  | 6.968812 | 5.588772  | 0.166   | 0.208    | 0.000663 | 0.000149 | 2.152251 | 8  |
| 10152_at  | YLR172C | DPH5     | 8.05401  | 8.096987 | 8.243874 | 7.995372 | 7.899445 | 8.30097  | 7.537449 | 7.711764 | 7.708314 | 7.431414 | 7.514971 | 7.769005 | 6.324486 | 6.99307   | 6.854941 | 7.651309  | -0.364  | -0.0591  | 1.02E-05 | 4.80E-06 | 2.624105 | 16 |
| 10153_at  | YLR173W |          | 5.357512 | 5.028487 | 4.561437 | 5.24814  | 4.729031 | 5.151275 | 5.638233 | 6.199966 | 6.068437 | 6.131609 | 6.082368 | 5.592683 | 5.598323 | 5.473196  | 5.481784 | 5.811586  | 0.177   | -0.164   | 0.0229   | 0.003221 | 1.97577  | 9  |
| 10154_at  | YLR174W | IDP2     | 6.148965 | 5.763904 | 5.711533 | 6.467897 | 6.463524 | 6.321617 | 7.251156 | 7.325023 | 6.956246 | 6.263939 | 7.197342 | 7.719402 | 6.990329 | 7.134411  | 6.963261 | 7.412888  | 0.362   | -0.271   | 0.000104 | 3.16E-05 | 3.446816 | 10 |
| 10155_at  | YLR175W | CBF5     | 10.27888 | 10.32004 | 10.36601 | 9.673066 | 9.869914 | 9.53033  | 9.653534 | 9.80062  | 9.446394 | 9.856297 | 9.195764 | 8.404654 | 8.35283  | 7.938666  | 7.898694 | 9.274882  | -0.578  | -0.0247  | 2.08E-06 | 1.46E-06 | 4.364168 | 18 |
| 10156_at  | YLR176C | RFK1     | 4.525295 | 4.459557 | 4.93925  | 5.001498 | 5.075082 | 5.342929 | 4.952942 | 5.31617  | 5.297373 | 5.317167 | 4.832817 | 6.309601 | 5.981364 | 6.358255  | 5.669714 | 5.498083  | 0.434   | -0.06631 | 3.73E-05 | 1.36E-05 | 3.159856 | 7  |
| 10157_at  | YLR177W |          | 7.680181 | 7.41187  | 7.507622 | 8.765059 | 8.578959 | 8.534186 | 8.536682 | 8.52201  | 8.906155 | 8.933925 | 8.665158 | 8.262535 | 9.5876   | 9.694495  | 9.221362 | 8.901661  | 0.462   | -0.098   | 4.59E-06 | 2.63E-06 | 3.405731 | 7  |
| 10158_at  | YLR178C | TFS1     | 8.972146 | 9.269193 | 9.838101 | 11.22586 | 10.85467 | 11.22528 | 11.03807 | 10.80268 | 11.52791 | 10.57855 | 10.71847 | 11.37554 | 10.34426 | 10.68805  | 11.0074  | 11.25768  | 0.266   | -0.328   | 0.000989 | 0.000211 | 3.391545 | 10 |
| 10159_at  | YLR179C |          | 11.40975 | 11.5858  | 11.85566 | 11.72491 | 11.49736 | 11.70077 | 10.93121 | 11.29028 | 11.44362 | 9.85138  | 10.79702 | 11.48606 | 9.521764 | 9.523221  | 9.987115 | 10.93884  | -0.55   | -0.0731  | 1.13E-05 | 5.23E-06 | 4.292125 | 18 |
| 10160_at  | YLR180W | SAM1     | 8.751747 | 8.62304  | 8.804547 | 9.023809 | 8.770639 | 8.774455 | 8.272904 | 8.515196 | 8.865455 | 8.578697 | 8.362454 | 8.119844 | 8.971031 | 8.40672   | 8.651359 | 8.530767  | -0.0497 | 0.0526   | 0.348    | 0.036731 | 1.230228 | 13 |
| 10161_g_e | YLR180W | SAM1     | 12.75958 | 12.50007 | 11.69163 | 13.21704 | 13.25668 | 12.65632 | 13.07309 | 13.24182 | 13.32599 | 13.44053 | 13.23033 | 13.29509 | 12.62126 | 12.46268  | 12.38505 | 13.32634  | 0.0492  | -0.253   | 0.000482 | 0.000115 | 1.996128 | 12 |
| 10162_at  | YLR181C | VT1A     | 5.443377 | 5.801594 | 6.657019 | 5.713821 | 5.950905 | 5.484542 | 5.914356 | 5.943935 | 5.145832 | 5.668773 | 5.380937 | 5.381048 | 5.247458 | 5.37455   | 5.187935 | 5.501957  | -0.178  | 0.0321   | 0.0537   | 0.006909 | 1.602044 | 16 |
| 10163_at  | YLR182W | SW16     | 5.41268  | 5.390662 | 5.654897 | 5.381968 | 5.485262 | 5.136845 | 5.384422 | 5.452007 | 5.153992 | 5.66598  | 5.162814 | 5.259919 | 5.567511 | 5.700006  | 5.215549 | 5.326925  | 0.00705 | 0.044    | 0.374    | 0.039176 | 1.120499 | 13 |
| 10164_at  | YLR183C | TOS4     | 5.980701 | 6.18283  | 6.378694 | 5.454774 | 5.658885 | 5.532396 | 5.452814 | 5.324742 | 4.315952 | 3.988867 | 3.990715 | 3.850914 | 3.731627 | 3.939753  | 3.854253 | 4.274961  | -0.655  | 0.213    | 1.7E-06  | 1.25E-06 | 5.677397 | 18 |
| 10165_at  | YLR184W |          | 3.908906 | 3.557701 | 4.55679  | 3.743523 | 3.700436 | 3.570094 | 3.884688 | 3.465192 | 3.569791 | 3.596531 | 3.528977 | 3.49557  | 3.336756 | 3.427742  | 3.438773 | 3.54723   | -0.149  | 0.0417   | 0.0209   | 0.002973 | 1.48548  | 16 |
| 10166_at  | YLR185W | RPL37A   | 12.22236 | 12.24744 | 12.52863 | 12.1259  | 12.16717 | 12.20722 | 11.62539 | 11.4941  | 11.21854 | 11.34719 | 11.41258 | 11.54456 | 11.15716 | 11.46983  | 11.28163 | 11.52518  | -0.285  | 0.0859   | 0.00027  | 6.98E-05 | 2.130555 | 16 |
| 10167_at  | YLR186W | EMG1     | 8.881706 | 8.97706  | 9.104236 | 8.471998 | 8.70595  | 8.50068  | 7.948308 | 7.763171 | 7.697148 | 7.731893 | 7.682207 | 7.273323 | 7.20505  | 7.172478  | 6.905144 | 7.736368  | -0.508  | 0.0891   | 1.06E-06 | 8.86E-07 | 3.84326  | 18 |
| 10168_at  | YLR187W | SKG3     | 6.411225 | 6.231749 | 6.298571 | 6.179956 | 6.16724  | 6.243817 | 6.183282 | 6.01187  | 5.701517 | 6.076404 | 6.883782 | 6.286651 | 6.898299 | 7.514248  | 7.183814 | 6.308708  | 0.32    | 0.158    | 1.19E-05 | 5.45E-06 | 2.549822 | 8  |
| 10169_at  | YLR188W | MDL1     | 8.061881 | 8.148477 | 8.183276 | 8.085547 | 8.102828 | 7.971949 | 7.4635   | 7.263949 | 7.370571 | 6.826777 | 7.045811 | 6.901377 | 6.19246  | 6.087802  | 6.116109 | 7.221701  | -0.549  | -0.0183  | 4.79E-08 | 1.06E-07 | 4.281112 | 18 |
| 10170_g_e | YLR140W |          | 8.661256 | 8.534531 | 8.99686  | 8.39243  | 8.439798 | 8.69903  | 8.019512 | 7.941335 | 8.444519 | 7.776314 | 8.26148  | 8.023254 | 8.03544  | 8.168349  | 8.179854 | 8.109685  | -0.172  | 0.0911   | 0.0027   | 0.000499 | 1.643531 | 16 |
| 10171_at  | YLR141W | RNR5     | 5.668925 | 5.40041  | 6.052168 | 5.398933 | 5.58799  | 5.836032 | 5.395308 | 5.353765 | 5.370919 | 5.205424 | 5.43379  | 4.974415 | 4.974526 | 5.253743  | 5.308578 | 5.31569   | -0.153  | 0.0377   | 0.0112   | 0.001721 | 1.998818 | 16 |
| 10172_at  | YLR142W | PUT1     | 6.392158 | 6.189273 | 6.127017 | 7.768867 | 8.508178 | 7.213973 | 10.22419 | 9.764088 | 10.17376 | 10.52122 | 10.22686 | 10.45109 | 8.987889 | 8.967655  | 9.01231  | 10.07568  | 0.791   | -0.693   | 1.09E-05 | 5.08E-06 | 1.490573 | 4  |
| 10173_at  | YLR143W |          | 5.093057 | 5.17183  | 5.531314 | 4.412755 | 4.479345 | 4.754883 | 4.371573 | 4.545747 | 4.772321 | 4.174022 | 4.338026 | 4.107343 | 3.942337 | 4.427426  | 4.108781 | 4.290564  | -0.282  | 0.113    | 1.83E-05 | 7.60E-06 | 2.112888 | 14 |
| 10174_at  | YLR144C | ACF2     | 6.899503 | 6.818152 | 6.67136  | 7.180008 | 7.203191 | 7.080886 | 7.33502  | 6.899813 | 7.17032  | 6.874354 | 7.056226 | 7.099617 | 6.371608 | 6.969579  | 6.403214 | 7.122928  | -0.069  | -0.117   | 0.00294  | 0.000535 | 1.437322 | 12 |
| 10175_at  | YLR145W | RMP1     | 4.67996  | 4.905727 | 5.842245 | 5.165585 | 5.25905  | 5.261818 | 5.08068  | 4.914447 | 4.76607  | 5.172927 | 4.804433 | 5.107922 | 4.318848 | 4.709992  | 4.300354 | 5.019286  | -0.176  | -0.0606  | 0.0249   | 0.003484 | 1.592921 | 16 |
| 10176_at  | YLR146C | SPE4     | 6.078966 | 5.96727  | 6.687053 | 6.079424 | 6.243581 | 6.102827 | 5.920835 | 5.770709 | 5.882003 | 5.532655 | 5.477029 | 5.950039 | 4.763346 | 4.873507  | 4.958147 | 5.759797  | -0.361  | -0.059   | 5.52E-06 | 3.01E-06 | 2.600853 | 16 |
| 10177_at  | YLR147C | SMD3     | 7.625814 | 7.678226 | 8.091859 | 7.744747 | 7.917916 | 7.677366 | 7.623673 | 7.232899 | 7.280534 | 7.491579 | 7.134815 | 6.514837 | 6.77991  | 6.791287  | 6.381169 | 7.27531   | -0.325  | -0.00884 | 0.000491 | 0.000116 | 2.608951 | 16 |
| 10178_at  | YLR148W | PEP3     | 3.85789  | 3.626307 | 4.666003 | 3.403345 | 3.766093 | 3.554624 | 3.522401 | 3.544726 | 3.610636 | 3.336421 | 3.299612 | 3.240402 | 2.88325  | 3.202563  | 3.171576 | 3.364577  | -0.246  | 0.0543   | 0.00116  | 0.000241 | 1.920058 | 16 |
| 10179_at  | YLR149C |          | 5.542624 | 5.245432 | 5.3128   | 6.639347 | 6.606066 | 6.021651 | 7.130059 | 7.045297 | 6.865541 | 7.277377 | 7.446964 | 5.521265 | 7.476014 | 7         |          |           |         |          |          |          |          |    |

|          |         |         |          |          |          |          |          |          |          |          |          |          |          |          |           |          |          |          |          |          |          |          |          |    |
|----------|---------|---------|----------|----------|----------|----------|----------|----------|----------|----------|----------|----------|----------|----------|-----------|----------|----------|----------|----------|----------|----------|----------|----------|----|
| 10211_at | YLR137W | 5.95783 | 5.638386 | 5.875705 | 5.351897 | 5.658885 | 5.617372 | 5.41977  | 5.523119 | 5.65423  | 5.569894 | 5.467731 | 5.368289 | 5.639038 | 5.531304  | 5.283159 | 5.434337 | -0.0749  | 0.0576   | 0.0212   | 0.003016 | 1.296683 | 13       |    |
| 10212_at | YLR138W | NHA1    | 6.12037  | 6.265689 | 6.420856 | 6.03987  | 6.348434 | 5.936559 | 6.350576 | 6.117971 | 6.220713 | 6.902732 | 6.362442 | 6.300572 | 7.397249  | 7.634709 | 6.739416 | 6.338639 | 0.27     | 0.114    | 0.00025  | 6.53E-05 | 2.12432  | 8  |
| 10213_at | YLR139C | SLS1    | 4.999365 | 4.750217 | 5.100051 | 5.202301 | 5.209062 | 5.145103 | 5.086834 | 5.30955  | 4.919816 | 5.1976   | 5.29403  | 5.36672  | 5.426553  | 5.720476 | 5.213478 | 5.239198 | 0.127    | -0.00884 | 0.00678  | 0.001113 | 1.401253 | 13 |
| 10214_at | YLR140W |         | 4.490461 | 4.298048 | 4.750204 | 4.19701  | 4.299017 | 4.540714 | 4.078634 | 4.177804 | 4.436969 | 4.304919 | 4.186294 | 4.461369 | 4.445113  | 4.812367 | 4.443972 | 4.221668 | 0.00677  | 0.0884   | 0.0253   | 0.00353  | 1.247159 | 13 |
| 10215_at | YLR096W | KIN2    | 6.91388  | 7.162235 | 7.092835 | 6.867273 | 6.817106 | 6.747282 | 6.82146  | 6.57081  | 6.499474 | 6.769892 | 6.580245 | 6.559702 | 6.415648  | 7.092546 | 6.385349 | 6.625634 | -0.107   | 0.0601   | 0.00278  | 0.003841 | 1.373485 | 13 |
| 10216_at | YLR097C | HRT3    | 6.078815 | 6.236932 | 5.787769 | 6.492349 | 6.389794 | 6.423845 | 6.762752 | 6.395997 | 6.612333 | 6.53293  | 6.604349 | 6.313015 | 6.197329  | 6.201506 | 5.725523 | 6.56567  | -0.00523 | -0.144   | 0.00144  | 0.00291  | 1.424959 | 12 |
| 10217_at | YLR098C | CHA4    | 5.484582 | 5.425783 | 4.8325   | 5.467733 | 5.362515 | 5.645702 | 5.709251 | 5.735804 | 5.456151 | 5.573666 | 5.290191 | 5.272273 | 4.952251  | 5.439066 | 5.047796 | 5.523506 | -0.0425  | -0.0884  | 0.0637   | 0.008058 | 1.318462 | 13 |
| 10218_at | YLR099C | ICT1    | 10.93281 | 10.87124 | 10.57981 | 11.03586 | 10.94657 | 10.93404 | 11.00748 | 11.27801 | 11.03958 | 11.67794 | 11.61244 | 11.68836 | 11.56296  | 11.93358 | 11.74502 | 11.37202 | 0.281    | -0.0313  | 1.65E-05 | 7.01E-06 | 2.104781 | 7  |
| 10219_at | YLR100W | ERG27   | 10.82269 | 10.7484  | 10.57689 | 11.33134 | 11.32387 | 10.73107 | 11.36102 | 11.21718 | 10.88531 | 11.50772 | 11.09864 | 10.70277 | 9.773443  | 9.85063  | 9.538958 | 11.15909 | -0.246   | -0.259   | 1.35E-05 | 5.97E-06 | 2.077086 | 15 |
| 10220_at | YLR101C |         | 6.689612 | 7.11335  | 5.922646 | 5.915016 | 6.598311 | 6.592389 | 6.775458 | 6.68268  | 6.397384 | 6.515296 | 6.729832 | 6.206277 | 5.867396  | 6.492133 | 6.337802 | 6.482631 | -0.0755  | -0.0251  | 0.526    | 0.053195 | 1.221433 | 13 |
| 10221_at | YLR102C | APC9    | 4.928381 | 4.791827 | 4.663622 | 4.560693 | 4.716894 | 5.070385 | 5.08819  | 5.404379 | 5.173794 | 5.430423 | 5.297993 | 5.322782 | 5.265273  | 5.650497 | 5.246672 | 5.213479 | 0.178    | -0.0387  | 0.00522  | 0.000887 | 1.603577 | 13 |
| 10222_at | YLR103C | CDC45   | 5.892324 | 6.303916 | 6.216661 | 5.88034  | 5.887503 | 5.88407  | 5.416419 | 5.401873 | 5.037364 | 5.332467 | 5.272895 | 4.807981 | 5.658303  | 5.771176 | 5.286235 | 5.280336 | -0.179   | 0.164    | 0.00183  | 0.000358 | 1.981355 | 14 |
| 10223_at | YLR104W |         | 8.094377 | 8.18122  | 8.318283 | 8.328544 | 8.560862 | 8.52516  | 8.266553 | 8.185087 | 7.982886 | 8.638277 | 8.293323 | 8.108146 | 7.889467  | 8.348707 | 7.892713 | 8.322698 | -0.0419  | -0.0525  | 0.221    | 0.024453 | 1.213027 | 13 |
| 10224_at | YLR105C | SEN2    | 8.141531 | 8.079027 | 7.806169 | 7.785743 | 7.768323 | 7.4452   | 7.909022 | 7.889025 | 7.555725 | 7.955574 | 7.436895 | 7.302947 | 7.536691  | 7.580358 | 7.288745 | 7.612863 | -0.136   | 0.0325   | 0.0237   | 0.003329 | 1.43228  | 16 |
| 10225_at | YLR106C | MDN1    | 5.758352 | 6.323972 | 6.237125 | 6.170075 | 6.187171 | 5.841751 | 6.146533 | 6.190749 | 6.143146 | 7.380068 | 7.303894 | 7.596083 | 8.326425  | 8.175027 | 8.224571 | 6.747102 | 0.627    | 0.11     | 1.17E-06 | 9.48E-07 | 5.256583 | 6  |
| 10226_at | YLR107W | REX3    | 6.896882 | 6.516875 | 6.532348 | 6.894381 | 7.320987 | 6.690197 | 7.575471 | 7.686797 | 7.466607 | 7.659786 | 7.276693 | 7.309291 | 6.63145   | 6.855969 | 6.812893 | 7.440474 | 0.0362   | -0.21    | 0.00154  | 0.000308 | 1.762218 | 12 |
| 10227_at | YLR108C |         | 7.105561 | 6.589645 | 6.472226 | 6.844525 | 6.524867 | 6.199539 | 6.487348 | 6.857652 | 6.737765 | 6.643333 | 6.726858 | 6.665445 | 6.6573981 | 6.60892  | 6.678082 | -0.0116  | -0.0109  | 0.927    | 0.008803 | 1.062336 | 13       |    |
| 10228_at | YLR109W | AHP1    | 11.31601 | 11.28981 | 11.8683  | 11.91122 | 11.82511 | 12.16526 | 11.78378 | 11.78362 | 12.1745  | 11.73627 | 11.89642 | 12.31631 | 10.94926  | 11.4998  | 11.22258 | 12.00808 | -0.0679  | -0.177   | 0.00178  | 0.000349 | 1.68894  | 12 |
| 10229_at | YLR110C | CCW12   | 13.693   | 13.69905 | 13.68374 | 13.8027  | 13.81382 | 13.94201 | 13.69121 | 13.76865 | 13.8757  | 13.82948 | 13.80302 | 13.7494  | 13.3256   | 13.67552 | 13.3344  | 13.81336 | -0.064   | -0.0664  | 0.000674 | 0.000151 | 1.301064 | 13 |
| 10230_at | YLR111W |         | 5.489978 | 5.553099 | 6.098843 | 5.408163 | 5.592654 | 5.626694 | 5.126732 | 5.349866 | 5.479564 | 5.12591  | 5.528749 | 4.987819 | 5.803715  | 5.486711 | 5.291272 | 5.287074 | -0.0641  | 0.0944   | 0.0592   | 0.007548 | 1.933186 | 13 |
| 10231_at | YLR112W |         | 6.199072 | 6.194204 | 6.793677 | 5.887352 | 5.858239 | 6.143747 | 5.890249 | 5.948607 | 6.089136 | 5.793776 | 5.864078 | 5.856674 | 5.983632  | 6.026227 | 5.780087 | 5.849    | -0.116   | 0.0842   | 0.00394  | 0.000694 | 1.47652  | 16 |
| 10232_at | YLR113W | HOG1    | 9.063028 | 9.195907 | 9.347683 | 9.818691 | 9.733607 | 9.684344 | 9.314723 | 9.311393 | 9.800827 | 9.289365 | 9.287862 | 9.430631 | 9.865293  | 9.019442 | 9.068981 | 9.523848 | -0.0807  | -0.107   | 0.00618  | 0.001027 | 1.471571 | 12 |
| 10233_at | YLR114C | AVL9    | 4.626219 | 4.614025 | 5.433471 | 4.380532 | 4.461753 | 4.218045 | 4.191688 | 4.078619 | 4.091726 | 4.757155 | 4.471619 | 4.414661 | 4.528933  | 4.440493 | 4.470619 | 4.277259 | -0.0642  | 0.108    | 0.0871   | 0.010643 | 1.442007 | 13 |
| 10234_at | YLR115W | CFT2    | 5.509829 | 5.327081 | 5.800896 | 5.054704 | 5.058085 | 5.084941 | 5.236164 | 5.169392 | 5.173278 | 5.019419 | 5.038799 | 4.952028 | 6.637082  | 4.527181 | 4.360817 | 5.008839 | -0.249   | 0.00105  | 1.31E-05 | 5.85E-06 | 1.932287 | 16 |
| 10235_at | YLR116W | MSL5    | 6.310318 | 6.162022 | 6.418275 | 6.303213 | 6.176079 | 6.160675 | 6.009983 | 6.022781 | 6.142112 | 6.140194 | 6.30278  | 6.209896 | 6.165942  | 6.322582 | 6.144243 | 6.14434  | -0.0138  | 0.03     | 0.255    | 0.027711 | 1.095052 | 13 |
| 10236_at | YLR117C | CLF1    | 4.698873 | 4.439122 | 5.348494 | 4.179905 | 4.225437 | 4.221186 | 4.696751 | 4.527733 | 4.28216  | 4.260949 | 4.638597 | 4.377233 | 6.755716  | 4.937    | 5.369153 | 4.561579 | 0.263    | 0.184    | 0.0101   | 0.001569 | 2.407199 | 8  |
| 10237_at | YLR118C |         | 7.578264 | 7.323636 | 7.960886 | 7.697812 | 7.592853 | 7.515407 | 7.745356 | 7.418717 | 7.403646 | 6.981971 | 7.253162 | 7.496827 | 6.999318  | 6.613872 | 6.7246   | 7.392991 | -0.229   | -0.0515  | 0.000301 | 7.63E-05 | 1.835216 | 16 |
| 10238_at | YLR074C | BUD20   | 8.209802 | 8.472279 | 8.522685 | 8.57112  | 8.818048 | 8.532999 | 8.751632 | 8.553203 | 8.913075 | 8.417137 | 8.346006 | 7.726115 | 7.993366  | 6.109448 | 8.588719 | -0.156   | -0.0913  | 0.000493 | 0.000844 | 1.624355 | 15       |    |
| 10239_at | YLR075W | RPL10   | 12.35632 | 12.38639 | 12.43216 | 12.16404 | 12.2792  | 12.37109 | 11.97814 | 12.11298 | 12.29873 | 12.10905 | 12.02383 | 11.88555 | 11.60505  | 11.82774 | 11.62586 | 12.07042 | -0.185   | -0.00793 | 7.89E-06 | 3.96E-06 | 1.632219 | 16 |
| 10240_at | YLR076C |         | 6.536049 | 7.083506 | 6.795437 | 5.489507 | 6.189395 | 6.074454 | 6.156123 | 6.216684 | 6.195783 | 5.886994 | 6.340311 | 5.546962 | 6.021224  | 6.872295 | 6.027344 | 5.904005 | -0.112   | 0.173    | 0.0212   | 0.003016 | 1.821052 | 14 |
| 10241_at | YLR077W | PMF25   | 7.905843 | 7.952235 | 8.10412  | 8.128399 | 8.404507 | 8.336111 | 8.088737 | 8.037106 | 8.18938  | 8.071033 | 8.77462  | 7.569901 | 8.981788  | 8.954943 | 8.448093 | 8.041413 | 0.146    | 0.104    | 0.0213   | 0.003025 | 1.635178 | 13 |
| 10242_at | YLR078C | BOS1    | 7.612174 | 7.749044 | 8.533845 | 8.231963 | 8.312976 | 7.981825 | 8.081824 | 8.178442 | 8.160591 | 8.391004 | 8.188242 | 8.4244   | 7.378663  | 7.465847 | 7.758934 | 8.251179 | -0.0901  | -0.139   | 0.00716  | 0.001166 | 1.608538 | 12 |
| 10243_at | YLR079W | SIC1    | 7.302202 | 7.347956 | 7.512614 | 7.335489 | 7.304608 | 7.127202 | 7.341975 | 7.178009 | 7.348791 | 7.625482 | 7.358962 | 7.453833 | 7.301427  | 7.484023 | 7.310806 | 7.351871 | 0.0159   | 0.00414  | 0.812    | 0.078766 | 1.043141 | 13 |
| 10244_at | YLR080W | EMP46   | 5.742999 | 5.606996 | 6.484781 | 6.490793 | 6.491071 | 6.477591 | 6.863629 | 6.308588 | 6.438484 | 6.108858 | 6.255309 | 5.688423 | 6.112245  | 6.238541 | 5.742017 | 6.302177 | -0.0438  | -0.0783  | 0.371    | 0.038916 | 1.921288 | 13 |
| 10245_at | YLR081W | GAL2    | 5.639555 | 5.51564  | 6.037967 | 5.428906 | 5.427079 | 5.428018 | 5.375946 | 5.239282 | 5.220047 | 5.470939 | 5.569449 | 5.642631 | 6.332677  | 5.90409  | 5.935913 | 5.46503  | 0.105    | 0.116    | 0.000875 | 0.000189 | 1.564197 | 13 |
| 10246_at | YLR082C | SRL2    | 4.275179 | 3.754908 | 4.818056 | 4.010855 | 4.201967 | 3.759698 | 4.126688 | 3.99599  | 4.057589 | 4.365832 | 4.107057 | 3.922316 | 3.300337  | 3.372448 | 3.288657 | 4.025254 | -0.213   | -0.0662  | 0.00607  | 0.001009 | 1.578785 | 16 |
| 10247_at | YLR083C | EMP70   | 9.110347 | 8.993899 | 8.64967  | 8.415363 | 8.409997 | 8.136756 | 8.295275 | 8.04197  | 8.019732 | 7.86883  | 7.918145 | 7.878374 | 7.517766  | 7.255395 | 7.194089 | 7.945528 | -0.401   | 0.0464   | 1.84E-07 | 2.55E-07 | 2.898768 | 16 |
| 10248_at | YLR084C | RAK2    | 5.745231 | 5.944225 | 6.311964 | 5.652336 | 5.592639 | 5.878132 | 5.528967 | 5.343739 | 5.174162 | 5.221352 | 5.378913 | 4.922702 | 5.895311  | 5.523155 | 5.257549 | 5.208962 | -0.122   | 0.158    | 0.00112  | 0.000234 | 1.783773 | 13 |
| 10249_at | YLR085C | ARP6    | 7.714353 | 7.358229 | 7.498361 | 7.191033 | 7.365512 | 6.387121 | 7.034297 | 6.605868 | 6.066111 | 6.072582 | 6.407842 | 6.439199 | 6.581777  | 5.94092  | 6.758158 | -0.305   | 0.0455   | 0.000323 | 8.11E-05 | 2.24561  | 16       |    |
| 10250_at | YLR086W | SMC4    | 4.234378 | 3.997058 | 4.628356 | 3.957792 | 3.99734  | 3.637222 | 4.259966 | 3.853813 | 3.81896  | 3.969816 | 4.030969 | 3.781922 | 3.584554  | 3.612482 | 3.559641 | 3.869437 | -0.157   | 0.0141   | 0.0123   | 0.001867 | 1.517653 | 16 |
| 10251_at | YLR087C | CSF1    | 5.075492 | 4.897662 | 5.589534 | 5.030285 | 4.967994 | 5.058157 | 5.033806 | 4.97325  | 5.14517  | 4.991534 | 5.30     |          |           |          |          |          |          |          |          |          |          |    |

|            |          |          |          |          |          |          |          |          |          |          |          |          |          |          |          |          |          |         |          |          |          |          |    |
|------------|----------|----------|----------|----------|----------|----------|----------|----------|----------|----------|----------|----------|----------|----------|----------|----------|----------|---------|----------|----------|----------|----------|----|
| 10283_at   | YLR0317W | 3.435758 | 3.559673 | 4.14123  | 3.781149 | 3.904994 | 3.869543 | 4.646704 | 4.404383 | 4.250461 | 4.722784 | 4.351662 | 4.24493  | 4.417476 | 4.614968 | 4.038022 | 4.365663 | 0.185   | -0.096   | 0.0122   | 0.001849 | 1.699552 | 9  |
| 10284_at   | YLR032W  | 5.231564 | 5.295866 | 5.497121 | 5.384201 | 5.452618 | 5.169325 | 5.538583 | 5.183568 | 5.367568 | 5.752398 | 5.630364 | 5.363176 | 5.744046 | 6.145839 | 5.699355 | 5.465628 | 0.145   | 0.0363   | 0.00262  | 0.000485 | 1.468032 | 13 |
| 10285_at   | YLR033W  | 5.73793  | 5.923621 | 5.487324 | 5.609493 | 5.680016 | 5.721818 | 5.592397 | 6.133684 | 5.640733 | 5.970947 | 5.660884 | 5.478526 | 6.139975 | 6.306308 | 5.828165 | 5.731806 | 0.0889  | 0.0472   | 0.0739   | 0.000916 | 1.350433 | 13 |
| 10286_at   | YLR034C  | 8.251704 | 8.770158 | 8.632548 | 8.482815 | 8.606901 | 8.865771 | 8.892426 | 8.714979 | 8.52146  | 8.678368 | 8.767281 | 8.424405 | 9.289807 | 9.255082 | 9.391104 | 8.723386 | 0.165   | 0.0611   | 0.00261  | 0.000484 | 1.558095 | 13 |
| 10287_at   | YLR035C  | 4.635004 | 4.553829 | 3.998943 | 4.628433 | 4.663711 | 4.743188 | 4.873934 | 4.981767 | 4.969592 | 4.704833 | 4.837019 | 4.936089 | 4.424233 | 4.910584 | 4.570527 | 4.85345  | 0.0581  | -0.0945  | 0.0406   | 0.005382 | 1.380143 | 13 |
| 10288_at   | YLR036C  | 6.815528 | 6.489913 | 6.165805 | 6.288724 | 6.25185  | 6.427488 | 6.072229 | 6.287745 | 6.089063 | 5.976382 | 5.931011 | 5.859703 | 5.460714 | 5.905953 | 5.260655 | 6.037075 | -0.261  | -0.0144  | 2.09E-05 | 8.50E-06 | 1.97695  | 16 |
| 10289_f_at | YLR037C  | 11.45791 | 11.56502 | 12.01955 | 11.88168 | 11.74656 | 12.01862 | 11.10516 | 11.57626 | 11.76076 | 11.27272 | 11.76458 | 12.34014 | 11.70471 | 12.02616 | 12.11436 | 11.71998 | 0.0648  | 0.0295   | 0.534    | 0.053959 | 1.202707 | 13 |
| 10290_at   | YLR038C  | 9.994628 | 9.823604 | 9.6271   | 11.61802 | 11.47229 | 10.91087 | 11.71044 | 11.82371 | 11.62177 | 11.99422 | 11.79561 | 11.7713  | 10.78937 | 10.90523 | 10.48847 | 11.91905 | 0.227   | -0.45    | 4.94E-08 | 1.08E-07 | 4.279613 | 10 |
| 10291_at   | YLR039C  | 5.707627 | 5.884706 | 6.119578 | 6.063456 | 5.859325 | 5.830174 | 5.824035 | 5.873764 | 5.485616 | 5.374733 | 5.30426  | 5.55101  | 4.548723 | 5.142684 | 4.64322  | 5.598326 | -0.307  | -0.068   | 1.29E-05 | 5.79E-06 | 2.25614  | 16 |
| 10292_at   | YLR040C  | 5.077456 | 4.962434 | 5.172348 | 4.688498 | 4.900812 | 5.080264 | 4.50431  | 4.863545 | 4.966397 | 5.105319 | 4.898089 | 4.790309 | 6.677306 | 6.314328 | 6.058074 | 4.868241 | 0.313   | 0.233    | 9.18E-07 | 7.96E-07 | 2.940707 | 8  |
| 10293_at   | YLR041W  | 3.960013 | 3.619056 | 3.623079 | 3.791538 | 3.979609 | 3.720101 | 4.253793 | 4.57863  | 3.825889 | 4.442677 | 4.185161 | 3.899865 | 3.996395 | 4.0341   | 3.754881 | 4.148387 | 0.0635  | -0.0905  | 0.00887  | 0.010828 | 1.378726 | 13 |
| 10294_at   | YLR042C  | 5.58083  | 5.533826 | 5.697437 | 4.919664 | 4.999167 | 5.391389 | 4.868756 | 4.837666 | 4.780339 | 5.238607 | 4.979082 | 4.541853 | 7.596901 | 6.898479 | 7.628306 | 4.889128 | 0.42    | 0.444    | 2.01E-07 | 2.71E-07 | 5.730172 | 8  |
| 10295_at   | YLR043C  | 11.40786 | 11.30758 | 11.93596 | 11.34628 | 11.27567 | 11.60563 | 10.55986 | 10.54989 | 10.95126 | 10.42307 | 10.06582 | 10.14787 | 10.92865 | 10.5379  | 10.75828 | 10.61459 | -0.265  | 0.155    | 0.00216  | 0.000412 | 2.320723 | 14 |
| 10296_at   | YLR044C  | 12.11153 | 12.14294 | 12.3834  | 12.15485 | 12.20644 | 12.5396  | 12.06334 | 12.02396 | 12.54274 | 12.44828 | 12.34269 | 12.66204 | 12.69745 | 12.70583 | 12.78805 | 12.36934 | 0.141   | 0.0283   | 0.005    | 0.000854 | 1.45249  | 13 |
| 10297_at   | YLR045C  | 6.939427 | 6.950161 | 7.652025 | 6.481378 | 6.566579 | 6.710433 | 3.383642 | 5.803834 | 5.785971 | 5.824252 | 5.895361 | 5.565641 | 6.977356 | 7.032733 | 6.692162 | 5.783266 | -0.102  | 0.352    | 0.000156 | 4.42E-05 | 2.76387  | 14 |
| 10298_at   | YLR046C  | 5.242109 | 5.127896 | 5.790921 | 5.078622 | 5.20408  | 5.585394 | 5.3553   | 5.171532 | 5.182821 | 5.426702 | 5.466519 | 5.76912  | 6.692258 | 6.369279 | 6.394421 | 5.396942 | 0.287   | 0.148    | 0.000011 | 5.11E-06 | 2.345588 | 8  |
| 10299_at   | YLR047C  | 4.448745 | 4.006024 | 4.247069 | 3.593802 | 3.830988 | 3.954962 | 4.354548 | 4.471532 | 4.469778 | 4.164402 | 4.32172  | 4.21823  | 4.555588 | 3.877845 | 4.530062 | 4.196537 | 0.0507  | 0.0144   | 0.678    | 0.006926 | 1.143925 | 13 |
| 10300_f_at | YLR048W  | 10.48055 | 10.44072 | 9.845881 | 9.614674 | 9.777399 | 10.08187 | 9.315055 | 9.576557 | 9.55641  | 8.694909 | 8.62048  | 8.753436 | 7.152029 | 6.997184 | 6.970986 | 9.073073 | -0.848  | -0.115   | 1.52E-10 | 5.06E-09 | 9.464802 | 18 |
| 10301_at   | YLR048W  | 12.68659 | 12.64358 | 12.1149  | 12.44303 | 12.40542 | 12.31818 | 11.76054 | 11.90997 | 11.77755 | 11.23992 | 11.31754 | 11.08391 | 9.157236 | 9.397427 | 9.808692 | 11.5715  | -0.862  | -0.195   | 2.31E-10 | 5.33E-09 | 9.81628  | 18 |
| 10302_g_e  | YLR048W  | 12.39673 | 12.35493 | 12.38905 | 12.03678 | 12.2649  | 12.17265 | 11.59261 | 11.3914  | 11.76671 | 11.14461 | 10.98438 | 11.10486 | 10.37124 | 10.21609 | 10.55286 | 11.3812  | -0.549  | 0.00572  | 7.08E-08 | 1.36E-07 | 4.289385 | 18 |
| 10303_at   | YLR049C  | 5.508355 | 5.557027 | 5.85625  | 6.251309 | 6.213593 | 5.765279 | 6.316501 | 6.194142 | 6.415009 | 6.300816 | 6.938281 | 7.601306 | 6.543267 | 6.238565 | 6.699487 | 6.774192 | 0.297   | -0.202   | 0.000988 | 0.000211 | 2.653051 | 9  |
| 10304_at   | YLR050C  | 8.99283  | 8.936861 | 8.931701 | 10.10282 | 9.824611 | 9.613954 | 9.629256 | 9.702111 | 9.631662 | 9.939876 | 9.872917 | 10.07415 | 8.271996 | 8.475794 | 8.455471 | 9.92595  | -0.129  | -0.341   | 2.07E-07 | 2.77E-07 | 2.731233 | 12 |
| 10305_at   | YLR009W  | 8.115514 | 8.132654 | 7.683445 | 7.112248 | 7.36228  | 7.269313 | 7.172695 | 7.486805 | 7.130771 | 7.23423  | 6.613278 | 7.66027  | 7.182012 | 6.80389  | 6.605515 | 6.972908 | -0.287  | 0.121    | 9.67E-05 | 2.97E-05 | 2.139378 | 14 |
| 10306_at   | YLR010C  | 4.412047 | 4.191648 | 4.851869 | 4.598504 | 4.651969 | 4.689448 | 4.410804 | 4.80953  | 4.637866 | 5.267589 | 4.95001  | 5.245834 | 5.805783 | 5.51581  | 5.721815 | 4.906828 | 0.328   | 0.0474   | 9.53E-06 | 4.58E-06 | 2.383424 | 7  |
| 10307_at   | YLR011W  | 5.382385 | 5.336244 | 6.084207 | 5.222426 | 5.306015 | 5.188934 | 4.727121 | 4.910206 | 4.89605  | 4.675107 | 4.649716 | 4.757134 | 5.381436 | 5.826905 | 5.70768  | 4.801134 | -0.0221 | 0.229    | 0.000403 | 9.78E-05 | 1.804695 | 14 |
| 10308_at   | YLR012C  | 3.980681 | 3.697631 | 4.45796  | 3.552418 | 3.769606 | 4.216816 | 3.336868 | 3.854043 | 4.049551 | 3.793429 | 3.969387 | 3.671401 | 4.063969 | 4.272299 | 4.045785 | 3.76975  | 0.0225  | 0.0869   | 0.164    | 0.018677 | 1.262981 | 13 |
| 10309_at   | YLR013W  | 3.658482 | 3.475655 | 4.383472 | 3.307022 | 3.368374 | 3.585265 | 3.683874 | 3.630829 | 3.621396 | 3.57084  | 3.771925 | 3.38327  | 3.80309  | 3.878858 | 3.721005 | 3.523871 | 0.00342 | 0.0778   | 0.185    | 0.020859 | 2.11155  | 13 |
| 10310_at   | YLR014C  | 6.076993 | 5.990249 | 5.839582 | 5.859034 | 5.869863 | 5.769287 | 6.045164 | 6.04579  | 6.118155 | 6.867828 | 6.454315 | 7.118399 | 6.898599 | 6.621472 | 6.358392 | 0.28     | 0.011   | 0.000496 | 0.000117 | 2.102905 | 7        |    |
| 10311_at   | YLR015W  | 5.107222 | 4.993636 | 5.53233  | 4.659631 | 5.15972  | 4.870276 | 5.596522 | 5.325861 | 4.820574 | 6.131453 | 5.601286 | 5.219599 | 5.646869 | 5.99056  | 5.499597 | 5.337894 | 0.181   | 0.0261   | 0.0754   | 0.009355 | 1.614932 | 13 |
| 10312_at   | YLR016C  | 6.808164 | 6.351885 | 7.154254 | 6.755555 | 6.901579 | 7.08191  | 6.477391 | 6.58388  | 6.762096 | 6.930449 | 6.89528  | 6.985822 | 6.266121 | 6.513284 | 6.532853 | 6.814605 | -0.0705 | -0.057   | 0.146    | 0.01688  | 1.287743 | 13 |
| 10313_at   | YLR017W  | 8.040914 | 8.362367 | 8.716943 | 8.102059 | 8.382984 | 8.488634 | 7.699078 | 7.661772 | 8.073858 | 8.139793 | 7.947225 | 7.944631 | 7.751917 | 7.776916 | 7.684505 | 7.970963 | -0.162  | 0.0261   | 0.0252   | 0.003514 | 1.537212 | 16 |
| 10314_at   | YLR018C  | 7.728697 | 7.368865 | 7.883897 | 7.222373 | 7.362337 | 7.123818 | 6.933192 | 6.632977 | 7.043134 | 6.978149 | 6.854713 | 6.111788 | 5.859226 | 5.770236 | 5.675969 | 6.741031 | -0.482  | -0.00707 | 3.32E-06 | 2.07E-06 | 3.593037 | 18 |
| 10315_at   | YLR019W  | 6.543572 | 6.568709 | 6.402238 | 6.851905 | 7.13988  | 6.393585 | 7.023966 | 7.00716  | 7.300362 | 8.183209 | 7.710628 | 8.067337 | 9.288054 | 8.391433 | 9.002874 | 7.5306   | 0.659   | 0.0415   | 5.35E-07 | 5.38E-07 | 4.543897 | 6  |
| 10316_at   | YLR020C  | 6.831405 | 6.432564 | 6.672516 | 6.483995 | 6.455119 | 6.133948 | 6.573246 | 6.461915 | 6.459031 | 7.270399 | 6.72936  | 6.525305 | 7.844575 | 6.548969 | 6.966402 | 6.600552 | 0.156   | 0.0727   | 0.064    | 0.008096 | 1.565945 | 13 |
| 10317_at   | YLR021W  | 6.495405 | 6.655714 | 7.408402 | 6.860283 | 6.923925 | 7.155334 | 6.326716 | 6.309283 | 6.068992 | 6.484321 | 6.600328 | 6.528068 | 6.08777  | 6.093423 | 6.273908 | 6.501603 | -0.185  | 0.0055   | 0.0513   | 0.006629 | 1.632193 | 16 |
| 10318_at   | YLR022C  | 7.08546  | 7.092194 | 7.980748 | 6.54995  | 6.696923 | 6.219619 | 6.096417 | 6.532343 | 5.808895 | 5.943218 | 6.373759 | 6.312909 | 7.661872 | 6.480774 | 6.477436 | 5.852001 | -0.143  | 0.354    | 0.0015   | 0.000302 | 2.957548 | 14 |
| 10319_at   | YLR023C  | 8.47218  | 8.097214 | 7.149003 | 6.55984  | 6.739225 | 7.698742 | 8.003391 | 8.616273 | 8.552671 | 8.753717 | 8.731111 | 8.139322 | 9.643677 | 6.68561  | 9.007691 | 8.625593 | 0.288   | -0.0305  | 0.0286   | 0.003936 | 2.145024 | 7  |
| 10320_at   | YLR024C  | 5.336154 | 5.437752 | 5.920316 | 5.374762 | 5.554156 | 5.293546 | 4.984636 | 5.264741 | 4.898431 | 4.46969  | 5.153123 | 4.893998 | 5.595732 | 5.342055 | 5.070265 | 5.026103 | -0.0851 | 0.121    | 0.0201   | 0.002877 | 1.535987 | 14 |
| 10321_at   | YLR025W  | 8.302923 | 8.36185  | 8.818558 | 8.09361  | 8.038982 | 7.894787 | 8.110597 | 8.172913 | 8.057555 | 7.959558 | 8.677752 | 7.722175 | 7.67035  | 7.760642 | 7.744096 | 7.902238 | -0.192  | 0.0543   | 0.00012  | 3.55E-05 | 1.665295 | 16 |
| 10322_at   | YLR026C  | 5.756238 | 5.827508 | 6.255481 | 5.665444 | 6.03816  | 5.632913 | 5.733791 | 5.698642 | 5.604518 | 5.712345 | 5.748123 | 5.548325 | 5.389243 | 5.921498 | 5.754559 | 5.666223 | -0.0652 | 0.0415   | 0.158    | 0.018108 | 1.228075 | 13 |
| 10323_at   | YLR027C  | 9.766196 | 9.799232 | 9.976048 | 9.484052 | 9.331763 | 9.484036 | 9.934377 | 9.904846 | 9.973093 | 9.390385 | 9.208775 | 9.233721 | 9.243209 | 9.690938 | 9.510601 | 9.839342 | -0.11   | 0.19     | 0.00155  | 0.00031  | 1.89088  | 14 |
| 10324_at   | YLR028C  | 9.125098 | 9.23689  | 9.148646 | 8.894437 | 9.051569 | 8.971795 | 9.847997 | 8.796    |          |          |          |          |          |          |          |          |         |          |          |          |          |    |

|            |         |        |          |          |          |          |          |          |          |          |          |          |          |          |          |          |          |          |         |         |          |          |          |    |
|------------|---------|--------|----------|----------|----------|----------|----------|----------|----------|----------|----------|----------|----------|----------|----------|----------|----------|----------|---------|---------|----------|----------|----------|----|
| 10355_at   | YLL031C | GPI13  | 7.675852 | 7.801081 | 7.076215 | 7.278719 | 7.218773 | 7.116621 | 7.284245 | 7.141401 | 6.920257 | 6.797799 | 6.752777 | 6.671864 | 7.621039 | 6.840804 | 7.790009 | 6.922292 | -0.0579 | 0.153   | 0.0263   | 0.003646 | 1.587217 | 13 |
| 10356_at   | YLL030C |        | 3.688489 | 3.554628 | 3.317419 | 3.316944 | 3.193946 | 3.58331  | 3.205144 | 3.584675 | 3.601608 | 3.294006 | 3.502533 | 3.153473 | 4.107072 | 3.886151 | 4.29812  | 3.372651 | 0.132   | 0.12    | 0.00104  | 0.00022  | 1.656688 | 13 |
| 10357_at   | YLL029W |        | 7.417199 | 7.138056 | 7.138487 | 7.781873 | 7.657316 | 7.662441 | 7.839855 | 8.135279 | 7.952996 | 8.298434 | 7.997024 | 7.949834 | 9.297559 | 8.819132 | 9.098935 | 8.069704 | 0.455   | 0.0242  | 3.6E-07  | 4.05E-07 | 3.33791  | 7  |
| 10358_at   | YLL028W | TPO1   | 8.581869 | 8.241186 | 8.210972 | 9.409144 | 8.708115 | 8.543491 | 9.394396 | 9.485932 | 9.194506 | 9.882024 | 8.844498 | 8.31052  | 11.67558 | 10.80054 | 11.69775 | 9.565885 | 0.8     | 0.0449  | 1.49E-07 | 2.22E-07 | 8.346373 | 6  |
| 10359_at   | YLL027W | ISA1   | 8.30848  | 8.027912 | 8.596191 | 8.712296 | 8.364095 | 8.302589 | 8.496869 | 8.832647 | 8.860655 | 9.565575 | 8.888439 | 9.30281  | 11.61829 | 10.81812 | 11.40255 | 8.996195 | 0.764   | 0.219   | 2.39E-08 | 6.50E-08 | 7.582961 | 5  |
| 10360_at   | YLL026W | HSP104 | 6.84126  | 6.86904  | 7.273527 | 8.415517 | 7.990105 | 8.117497 | 8.498843 | 8.737411 | 8.312864 | 7.753164 | 7.361241 | 7.776808 | 9.23965  | 8.991984 | 9.241675 | 8.136256 | 0.444   | -0.0024 | 0.00387  | 0.000683 | 3.242669 | 7  |
| 10361_f_at | YLL025W | PAU17  | 11.99982 | 11.98503 | 12.35097 | 12.24505 | 12.05208 | 12.2773  | 11.4908  | 11.89322 | 12.1242  | 11.73453 | 12.0603  | 12.76457 | 11.90775 | 12.14317 | 12.52328 | 12.06583 | 0.0283  | 0.0253  | 0.802    | 0.077951 | 1.113037 | 13 |
| 10362_at   | YLL024C | SSA2   | 11.38994 | 11.35917 | 11.74004 | 9.672696 | 9.288684 | 9.649574 | 8.880483 | 8.549938 | 8.926764 | 8.153737 | 8.151569 | 8.690556 | 10.05522 | 9.80746  | 10.54517 | 8.442573 | -0.377  | 0.654   | 1.29E-08 | 4.58E-08 | 8.908621 | 14 |
| 10363_at   | YLL023C |        | 8.084172 | 8.136623 | 7.815554 | 8.594671 | 8.354496 | 8.488747 | 8.500227 | 8.391702 | 8.650641 | 7.667568 | 7.612229 | 8.243365 | 7.408952 | 7.868236 | 7.554096 | 8.257826 | -0.161  | -0.116  | 0.00932  | 0.00146  | 1.726461 | 15 |
| 10364_at   | YLL022C | HIF1   | 7.699191 | 7.234681 | 7.794918 | 7.815022 | 7.579681 | 7.534036 | 7.46041  | 7.827146 | 7.483558 | 8.24207  | 7.283493 | 7.056099 | 7.535717 | 7.642666 | 7.363232 | 7.516711 | -0.0358 | 0.00978 | 0.763    | 0.074592 | 1.099432 | 13 |
| 10365_at   | YLL021W | SPA2   | 5.230615 | 5.150341 | 5.560405 | 4.721491 | 4.664942 | 4.587914 | 4.478575 | 4.679973 | 4.556139 | 5.071038 | 4.730934 | 4.644658 | 5.413599 | 5.409587 | 5.013795 | 4.613501 | 0.019   | 0.184   | 0.000384 | 9.37E-05 | 1.590579 | 13 |
| 10366_f_at | YLL020C |        | 8.23658  | 8.104808 | 7.531057 | 9.187669 | 8.845024 | 8.92876  | 9.420123 | 8.894477 | 9.444255 | 9.983095 | 9.747212 | 10.10553 | 10.88742 | 10.96874 | 10.7947  | 9.701668 | 0.756   | -0.0757 | 5.98E-09 | 2.87E-08 | 7.410135 | 6  |
| 10367_r_at | YLL020C |        | 6.427776 | 6.339895 | 5.407485 | 7.10478  | 6.812672 | 6.564724 | 6.661807 | 6.932443 | 7.019735 | 7.293139 | 7.586141 | 7.608388 | 8.367283 | 8.515304 | 8.199082 | 7.283482 | 0.593   | -0.018  | 1.18E-06 | 9.58E-07 | 4.81047  | 6  |
| 10368_s_at | YLL020C |        | 8.62094  | 8.37128  | 7.750814 | 9.828084 | 9.638707 | 9.544894 | 9.616681 | 9.664267 | 9.865761 | 10.37561 | 10.28324 | 10.77596 | 11.73148 | 11.80074 | 11.6672  | 10.29361 | 0.875   | -0.0769 | 8.59E-09 | 3.38E-08 | 10.17829 | 4  |
| 10369_at   | YLL019C | KNS1   | 5.448828 | 5.143792 | 5.17007  | 6.102992 | 6.033322 | 6.012376 | 6.22298  | 6.381302 | 6.724966 | 7.139957 | 6.864986 | 7.655302 | 8.251635 | 8.039777 | 8.522118 | 6.880082 | 0.796   | -0.0338 | 3.96E-09 | 2.14E-08 | 8.24675  | 6  |
| 10370_at   | YLL018C | DPS1   | 10.75624 | 10.56157 | 10.32217 | 10.14202 | 10.09106 | 10.05495 | 9.914038 | 9.824012 | 10.10334 | 9.997703 | 9.786489 | 9.739046 | 9.151937 | 9.573621 | 9.123006 | 9.845266 | -0.311  | 0.0172  | 6.64E-06 | 3.47E-06 | 2.280278 | 16 |
| 10373_at   | YLL057C | JLP1   | 5.030636 | 5.181602 | 4.984498 | 5.17201  | 5.272225 | 5.044509 | 5.450541 | 5.211011 | 5.643488 | 5.554606 | 5.574906 | 5.477682 | 5.555705 | 5.901213 | 5.968434 | 5.668725 | 0.217   | -0.0617 | 1.02E-05 | 4.83E-06 | 1.777296 | 9  |
| 10374_at   | YLL056C |        | 7.142478 | 6.672196 | 6.988503 | 8.111969 | 7.647413 | 8.535002 | 8.301053 | 8.338673 | 8.446488 | 8.919152 | 8.903016 | 9.415812 | 9.846007 | 9.710152 | 9.77206  | 8.910076 | 0.674   | -0.193  | 1.45E-07 | 2.20E-07 | 5.974976 | 4  |
| 10375_at   | YLL055W | YCT1   | 8.43137  | 7.745563 | 7.194546 | 9.702746 | 9.582578 | 9.161801 | 9.529055 | 9.49654  | 9.374836 | 9.315677 | 8.861489 | 8.71301  | 8.972317 | 9.115663 | 9.862153 | 9.478398 | 0.218   | -0.281  | 0.00764  | 0.001231 | 2.800871 | 10 |
| 10376_at   | YLL054C |        | 6.041976 | 5.436516 | 5.252835 | 6.681813 | 6.568079 | 5.341222 | 5.812766 | 6.048615 | 6.0433   | 6.254195 | 6.058119 | 5.691887 | 5.3466   | 5.174169 | 4.936906 | 5.901745 | -0.0734 | -0.154  | 0.0141   | 0.002096 | 1.613919 | 12 |
| 10377_at   | YLL053C |        | 7.439831 | 6.936592 | 7.050198 | 7.23523  | 7.656038 | 9.963878 | 7.047423 | 7.304814 | 7.272267 | 8.713477 | 7.720113 | 7.305398 | 8.585738 | 8.216684 | 8.070389 | 7.436985 | 0.304   | 0.0768  | 6.41E-05 | 2.12E-05 | 2.259036 | 8  |
| 10378_at   | YLL052C | AQY2   | 6.885011 | 6.054132 | 6.509753 | 6.197919 | 6.475839 | 5.880037 | 6.015359 | 6.473881 | 6.347445 | 6.655243 | 6.586926 | 6.125945 | 7.300412 | 6.810066 | 6.739193 | 6.313786 | 0.137   | 0.108   | 0.0173   | 0.002518 | 1.623461 | 13 |
| 10379_at   | YLL051C | FR6E   | 5.793494 | 5.69616  | 6.162646 | 5.6727   | 5.748923 | 5.893571 | 6.018842 | 5.754762 | 5.867162 | 6.24135  | 6.107505 | 6.360032 | 6.149562 | 6.230279 | 6.703688 | 6.016801 | 0.153   | 0.0255  | 0.00898  | 0.001414 | 1.501647 | 13 |
| 10380_at   | YLL050C | COF1   | 11.07605 | 11.16958 | 11.47582 | 11.31753 | 11.256   | 11.47003 | 10.55243 | 10.93359 | 11.24635 | 11.40593 | 10.6316  | 10.96711 | 9.960446 | 11.07539 | 10.41334 | 10.87669 | -0.290  | -0.04   | 0.00292  | 7.43E-05 | 2.206506 | 16 |
| 10381_at   | YLL049W | LDB18  | 6.062967 | 6.068741 | 6.770371 | 6.367032 | 6.193772 | 6.858344 | 6.656644 | 6.069761 | 6.640824 | 6.774792 | 6.710669 | 7.312875 | 6.326148 | 6.477798 | 6.497497 | 6.696249 | 0.0708  | -0.0933 | 0.191    | 0.021485 | 1.404259 | 13 |
| 10382_at   | YLL048C | YBT1   | 8.175779 | 8.074222 | 7.900135 | 7.483348 | 7.37095  | 7.395295 | 7.514549 | 7.323274 | 7.792755 | 7.726866 | 7.360077 | 7.260412 | 7.240841 | 7.341447 | 7.264431 | 7.406883 | -0.108  | 0.0677  | 0.00218  | 0.000415 | 1.614548 | 16 |
| 10383_at   | YLL047W |        | 5.106707 | 5.052012 | 5.980959 | 5.072361 | 5.148794 | 5.095199 | 4.805877 | 4.906126 | 5.481322 | 5.063207 | 5.32133  | 4.840128 | 5.116794 | 4.947348 | 5.395253 | 5.037865 | -0.0509 | 0.0616  | 0.367    | 0.03844  | 1.259761 | 13 |
| 10384_at   | YLL046C | RNP1   | 6.206393 | 6.180432 | 6.806343 | 6.264303 | 6.205759 | 5.969657 | 5.777916 | 6.07142  | 6.052453 | 6.333684 | 6.126854 | 5.598631 | 5.592128 | 5.598625 | 5.56652  | 5.961565 | -0.193  | 0.00687 | 0.00803  | 0.001286 | 1.668393 | 16 |
| 10385_i_at | YLL045C | RPL8B  | 11.13597 | 11.01819 | 11.16334 | 10.72549 | 10.77061 | 10.46925 | 9.864074 | 9.787936 | 9.849993 | 9.521102 | 9.366321 | 9.806794 | 8.346025 | 8.39966  | 8.610003 | 9.748124 | -0.695  | 0.0129  | 4.45E-08 | 1.01E-07 | 6.305168 | 18 |
| 10386_s_at | YLL045C | RPL8B  | 10.61822 | 10.67331 | 11.22656 | 10.29661 | 10.32019 | 10.55735 | 9.486036 | 9.123342 | 9.28558  | 8.309574 | 8.113391 | 8.84153  | 7.40185  | 7.945137 | 8.138228 | 8.98102  | -0.85   | 0.109   | 1.61E-06 | 1.21E-06 | 5.920386 | 18 |
| 10387_at   | YLL044W |        | 5.95845  | 6.604864 | 6.388043 | 4.52735  | 5.097704 | 4.72324  | 5.14012  | 4.874878 | 5.169765 | 4.687226 | 4.937452 | 4.12009  | 4.11895  | 4.012922 | 4.023619 | 4.563795 | -0.54   | 0.16    | 1.99E-05 | 8.15E-06 | 4.181542 | 18 |
| 10388_at   | YLL043W | FPS1   | 7.833819 | 7.91074  | 8.168773 | 7.566534 | 7.549066 | 7.725831 | 7.467227 | 7.300237 | 7.186392 | 8.144835 | 8.396446 | 8.285508 | 9.956026 | 9.549993 | 9.556169 | 7.786529 | 0.482   | 0.284   | 9.68E-08 | 1.68E-07 | 4.475512 | 8  |
| 10389_at   | YLL042C | ADG10  | 7.256414 | 7.017453 | 7.36865  | 7.347209 | 7.345399 | 7.062852 | 7.3347   | 7.321867 | 7.517007 | 7.499091 | 7.926171 | 7.693375 | 9.945819 | 8.858811 | 8.791169 | 7.551172 | 0.506   | 0.18    | 2.84E-06 | 1.84E-06 | 3.834727 | 8  |
| 10390_at   | YLL041C | SDH2   | 8.825022 | 8.910225 | 8.468182 | 10.48872 | 10.48872 | 10.48872 | 10.48872 | 10.48872 | 10.48872 | 10.48872 | 10.48872 | 10.48872 | 10.48872 | 10.48872 | 10.48872 | 10.48872 | 0.166   | -0.41   | 0.000134 | 3.89E-05 | 3.16468  | 10 |
| 10391_at   | YLL040C | VPS13  | 6.911581 | 7.03991  | 7.418937 | 7.31055  | 7.170355 | 7.447366 | 7.258692 | 7.217115 | 7.295269 | 6.43148  | 7.22343  | 7.402616 | 8.740208 | 8.045962 | 8.277890 | 7.206616 | 0.264   | 0.152   | 0.00188  | 0.000366 | 2.261396 | 8  |
| 10392_at   | YLL039C | UB4    | 8.506432 | 8.520658 | 7.651499 | 9.954899 | 9.74474  | 9.730207 | 9.870116 | 9.674029 | 9.836924 | 9.222485 | 10.04067 | 10.07281 | 10.3413  | 10.42488 | 10.43535 | 10.02888 | 0.488   | -0.185  | 0.000205 | 5.54E-05 | 3.647377 | 7  |
| 10393_at   | YLL038C | ENT4   | 4.964736 | 4.909709 | 5.216105 | 4.768579 | 4.500559 | 4.371806 | 4.628279 | 4.734944 | 4.498602 | 4.391672 | 4.731671 | 3.956651 | 4.358985 | 4.424027 | 4.107872 | 4.417505 | -0.185  | 0.0654  | 0.00262  | 0.000486 | 1.634785 | 16 |
| 10394_at   | YLL037W |        | 3.981291 | 3.87541  | 4.26829  | 3.513993 | 3.38823  | 3.760612 | 3.708596 | 3.639302 | 3.428782 | 3.465937 | 3.782058 | 3.482657 | 3.543373 | 3.735534 | 3.639349 | 3.546225 | -0.0925 | 0.0776  | 0.00414  | 0.000723 | 1.400307 | 16 |
| 10395_at   | YLL036C | PRP19  | 6.970931 | 7.116822 | 7.344293 | 7.091424 | 7.080811 | 7.169736 | 6.825812 | 6.891577 | 6.68779  | 6.623056 | 6.681023 | 6.694542 | 6.480518 | 6.748718 | 6.268922 | 6.771926 | -0.166  | 0.0153  | 0.000713 | 0.000159 | 1.553761 | 13 |
| 10411_f_at | YLL065W |        | 5.321022 | 5.479273 | 5.549514 | 5.242208 | 5.225074 | 5.72687  | 5.114739 | 5.117253 | 5.548786 | 5.305811 | 5.448864 | 5.215325 | 5.392559 | 5.851949 | 5.958122 | 5.318212 | 0.0652  | 0.0767  | 0.0458   | 0.005999 | 1.335048 | 13 |
| 10412_f_at | YLL064C | PAU18  | 11.47277 | 11.69822 | 12.06859 | 11.73574 | 11.64894 | 11.72458 | 10.87838 | 11.02241 |          |          |          |          |          |          |          |          |         |         |          |          |          |    |

|           |         |        |          |          |          |          |          |          |          |          |          |          |          |          |          |          |          |          |         |          |          |          |          |    |
|-----------|---------|--------|----------|----------|----------|----------|----------|----------|----------|----------|----------|----------|----------|----------|----------|----------|----------|----------|---------|----------|----------|----------|----------|----|
| 10484_at  | YKR103W | NFT1   | 3.972668 | 3.702936 | 3.245239 | 3.635541 | 3.735567 | 3.748175 | 4.288138 | 4.275261 | 4.524539 | 4.147101 | 4.141236 | 4.122662 | 3.995718 | 3.969653 | 3.881636 | 4.162311 | 0.0904  | -0.106   | 0.0433   | 0.005712 | 1.494171 | 13 |
| 10485_at  | YKR104W |        | 5.384978 | 5.206874 | 4.981285 | 5.212839 | 5.261703 | 5.295813 | 5.732541 | 5.715972 | 5.713109 | 5.902309 | 5.849384 | 5.878467 | 5.672778 | 6.018064 | 5.666639 | 5.730464 | 0.188   | -0.0676  | 0.000663 | 0.000149 | 1.647874 | 9  |
| 10486_s_a | YKR105C |        | 3.742774 | 3.723301 | 3.721009 | 3.681882 | 3.505466 | 3.820917 | 3.521779 | 3.710566 | 3.710672 | 3.504654 | 3.932574 | 3.341351 | 3.657657 | 3.862524 | 3.435466 | 3.62878  | -0.0212 | 0.0172   | 0.0692   | 0.06817  | 1.078563 | 13 |
| 10487_at  | YKR062W | TFA2   | 4.974568 | 5.134846 | 5.704152 | 5.225033 | 5.257629 | 4.84458  | 5.478519 | 5.092957 | 5.079644 | 5.313725 | 5.404772 | 5.099768 | 5.45344  | 5.431146 | 5.47204  | 5.266397 | 0.0689  | 0.023    | 0.266    | 0.02889  | 1.200232 | 13 |
| 10488_at  | YKR063C | LA51   | 6.333992 | 6.126986 | 6.820962 | 6.209688 | 6.242489 | 6.06025  | 6.504538 | 6.192471 | 6.131395 | 6.307504 | 5.861986 | 5.907569 | 5.876286 | 5.983339 | 5.673833 | 6.10291  | -0.151  | 0.00768  | 0.015    | 0.002221 | 1.490449 | 16 |
| 10489_at  | YKR064W | OAF3   | 4.654453 | 4.965205 | 5.379554 | 5.039992 | 5.025749 | 4.935586 | 5.183185 | 4.912752 | 4.867558 | 4.905993 | 5.952964 | 5.215002 | 4.623426 | 6.200730 | 6.159118 | 5.037673 | 0.305   | 0.167    | 5.33E-06 | 2.94E-06 | 1.582724 | 8  |
| 10490_at  | YKR065C | PAM17  | 7.462516 | 7.382262 | 7.667161 | 7.908569 | 7.771778 | 8.11697  | 7.967056 | 7.865127 | 7.808003 | 7.416653 | 7.574444 | 8.120589 | 7.188016 | 7.642078 | 7.301448 | 7.861123 | -0.0558 | -0.112   | 0.0161   | 0.002356 | 1.423814 | 12 |
| 10491_at  | YKR066C | CCP1   | 7.6657   | 7.498655 | 7.76636  | 8.114518 | 8.010584 | 8.059351 | 8.376477 | 8.089213 | 8.168648 | 8.61406  | 8.001994 | 8.242612 | 7.732411 | 8.305912 | 8.000298 | 8.278097 | 0.0965  | -0.123   | 0.00285  | 0.000522 | 1.574406 | 13 |
| 10492_at  | YKR067W | GP2    | 6.795687 | 6.906355 | 6.912801 | 7.369143 | 7.105855 | 6.393733 | 7.73991  | 7.782184 | 7.223706 | 8.039875 | 7.71333  | 7.854254 | 7.791054 | 8.347831 | 7.868804 | 7.692696 | 0.315   | -0.0742  | 0.00259  | 0.000482 | 2.304286 | 7  |
| 10493_at  | YKR068C | BET3   | 9.148943 | 9.095888 | 8.923521 | 9.121287 | 9.066123 | 8.855826 | 8.893466 | 9.303531 | 8.697561 | 8.861731 | 8.715194 | 8.680154 | 8.786831 | 9.445192 | 8.559109 | 8.895965 | -0.0534 | 0.0388   | 0.439    | 0.045323 | 1.196877 | 13 |
| 10494_at  | YKR069W | MET1   | 9.947097 | 9.688353 | 9.571263 | 10.00045 | 9.793894 | 9.496024 | 9.721992 | 10.06622 | 9.594929 | 10.58852 | 9.968329 | 9.672935 | 9.82533  | 10.02033 | 9.227904 | 9.917941 | 0.0163  | -0.059   | 0.546    | 0.055058 | 1.183897 | 13 |
| 10495_at  | YKR070W |        | 6.923304 | 7.090451 | 6.819827 | 7.19384  | 7.226597 | 7.21897  | 7.369165 | 7.641403 | 7.30826  | 7.415885 | 6.950649 | 7.055926 | 6.18553  | 6.585367 | 6.069552 | 7.287244 | -0.175  | -0.186   | 1.61E-05 | 6.85E-06 | 2.075885 | 15 |
| 10496_at  | YKR071C | DRE2   | 7.323783 | 7.400487 | 6.950935 | 7.167812 | 7.243412 | 6.782022 | 7.578872 | 7.759547 | 7.40512  | 8.900059 | 8.328251 | 7.7785   | 8.204213 | 8.660454 | 8.262443 | 7.831694 | 0.374   | -0.0194  | 0.00259  | 0.000482 | 2.693203 | 7  |
| 10497_at  | YKR072C | SIS2   | 7.498362 | 7.167598 | 6.048775 | 6.947182 | 6.976398 | 6.807328 | 7.380812 | 7.869442 | 6.997625 | 7.977802 | 7.490464 | 7.166054 | 7.637851 | 7.849501 | 7.476336 | 7.401297 | 0.219   | -0.0389  | 0.0751   | 0.009325 | 1.786906 | 9  |
| 10498_at  | YKR073C |        | 6.060323 | 5.685857 | 5.636498 | 5.589932 | 5.712661 | 5.928759 | 5.714448 | 5.850201 | 5.861266 | 5.632818 | 5.845633 | 5.287316 | 5.745615 | 5.702928 | 5.804827 | 5.691825 | -0.0255 | 0.023    | 0.625    | 0.002175 | 1.101461 | 13 |
| 10499_at  | YKR074W |        | 7.834856 | 7.521188 | 8.146031 | 7.837481 | 7.926229 | 8.111938 | 7.499348 | 7.63587  | 7.716234 | 7.232249 | 7.230117 | 7.400719 | 6.402178 | 6.940285 | 6.725656 | 7.522104 | -0.323  | -0.0666  | 2.31E-05 | 9.19E-06 | 2.355066 | 16 |
| 10500_at  | YKR075C |        | 9.451776 | 9.189495 | 8.899199 | 9.318199 | 9.634867 | 8.450302 | 9.027649 | 9.9255   | 9.446008 | 9.904706 | 8.807086 | 9.301183 | 8.420544 | 8.129495 | 7.336491 | 9.13515  | -0.318  | -0.157   | 0.00567  | 0.000951 | 2.533113 | 15 |
| 10501_at  | YKR076W | ECM4   | 5.756891 | 5.920334 | 6.577564 | 7.036975 | 6.890775 | 7.191327 | 7.596957 | 7.445514 | 7.46395  | 7.418416 | 7.320529 | 8.048881 | 6.666985 | 7.286117 | 7.431688 | 7.603757 | 0.268   | -0.274   | 0.000113 | 3.39E-05 | 2.984266 | 10 |
| 10502_at  | YKR077W |        | 9.585872 | 6.166594 | 6.231304 | 6.615489 | 6.340753 | 6.847763 | 7.28189  | 6.156618 | 6.175479 | 6.352345 | 5.875208 | 5.789813 | 5.982010 | 5.613734 | 5.874081 | 6.157502 | -0.166  | -0.068   | 0.00513  | 0.000874 | 1.580544 | 16 |
| 10503_at  | YKR078W |        | 5.749509 | 5.8929   | 6.170791 | 5.655926 | 5.739968 | 6.092588 | 5.586484 | 5.82705  | 6.542562 | 5.7924   | 5.42445  | 5.296993 | 5.157943 | 5.252622 | 5.401376 | 5.602985 | -0.181  | 0.00171  | 0.0013   | 0.000267 | 1.616728 | 16 |
| 10504_at  | YKR079C | TRZ1   | 4.599003 | 4.157888 | 4.193417 | 3.407882 | 3.502791 | 3.339045 | 3.388894 | 3.934464 | 3.287898 | 3.254395 | 3.052291 | 2.947472 | 2.706647 | 2.900376 | 3.070622 | -0.368   | 0.138   | 3.44E-08 | 8.57E-08 | 2.635302 | 14       |    |
| 10505_at  | YKR080W | MTD1   | 9.408929 | 9.646358 | 9.433745 | 9.18399  | 9.0634   | 9.04525  | 7.959919 | 8.083083 | 8.214362 | 7.83619  | 7.977689 | 7.780071 | 8.215821 | 8.25949  | 8.592539 | 8.090208 | -0.343  | 0.239    | 9.82E-05 | 3.01E-05 | 3.101162 | 14 |
| 10506_at  | YKR081C | RP2    | 8.774    | 9.014084 | 9.349549 | 8.409881 | 8.580042 | 8.414402 | 8.303913 | 8.389483 | 8.302132 | 8.094076 | 7.842704 | 7.366409 | 7.472232 | 7.542498 | 6.908068 | 7.997427 | -0.462  | 0.0496   | 2.81E-06 | 1.82E-06 | 3.401918 | 16 |
| 10507_at  | YKR082W | NAP133 | 6.460058 | 6.58734  | 6.724227 | 6.153336 | 6.046054 | 5.887385 | 6.277229 | 6.127555 | 5.763979 | 5.681914 | 5.782187 | 5.56973  | 5.374202 | 5.63718  | 5.191673 | 5.707181 | -0.299  | 0.078    | 0.000006 | 3.23E-06 | 2.208029 | 16 |
| 10508_at  | YKR083C | DAD2   | 4.440323 | 4.761295 | 5.221282 | 4.242945 | 4.482426 | 4.125729 | 4.373682 | 4.162096 | 3.95387  | 4.333916 | 3.98558  | 3.695888 | 3.417551 | 4.158085 | 3.588771 | 4.033424 | -0.199  | 0.104    | 0.00628  | 0.001041 | 1.771063 | 14 |
| 10509_at  | YKR084C | HBS1   | 6.161331 | 6.048923 | 6.361687 | 5.80935  | 5.847439 | 5.563297 | 6.63007  | 5.382347 | 5.426923 | 5.764013 | 5.397129 | 5.100974 | 5.108911 | 5.127861 | 4.826517 | 5.423841 | -0.291  | 0.0492   | 4.79E-05 | 1.67E-05 | 2.163526 | 16 |
| 10510_at  | YKR083C | KAE1   | 7.49172  | 7.197157 | 7.538222 | 7.338917 | 7.400817 | 7.175793 | 7.540462 | 7.508992 | 7.568399 | 7.824602 | 7.192912 | 7.331055 | 7.071928 | 7.081774 | 7.31823  | 7.438872 | -0.0761 | -0.0597  | 0.075    | 0.009322 | 1.308513 | 13 |
| 10511_at  | YKR039W | GAP1   | 6.69183  | 6.702456 | 6.296395 | 9.250285 | 8.75256  | 9.156187 | 10.35865 | 10.04325 | 10.29481 | 10.69852 | 10.11556 | 10.30992 | 9.709597 | 9.427057 | 9.093161 | 10.29864 | 0.757   | -0.642   | 5.13E-06 | 2.87E-06 | 15.99084 | 4  |
| 10512_at  | YKR040C |        | 6.000868 | 5.787144 | 6.051401 | 5.546886 | 5.408625 | 5.863292 | 5.236609 | 5.470026 | 5.81378  | 5.761256 | 5.639395 | 5.273217 | 5.621984 | 5.805467 | 5.622969 | 5.507644 | -0.0566 | 0.083    | 0.0576   | 0.007365 | 1.338846 | 13 |
| 10513_at  | YKR041W |        | 3.621738 | 3.277727 | 3.609016 | 3.221717 | 3.062616 | 3.224435 | 3.328854 | 3.403712 | 3.274612 | 3.504222 | 3.325552 | 3.007688 | 3.460264 | 3.402943 | 3.161636 | 3.293602 | -0.0261 | 0.0325   | 0.463    | 0.047506 | 1.128094 | 13 |
| 10514_at  | YKR042W | UTH1   | 11.28019 | 10.98547 | 10.90822 | 11.34618 | 11.23153 | 10.95204 | 11.46302 | 11.42876 | 11.36465 | 12.08783 | 11.95042 | 11.87465 | 11.73179 | 11.66144 | 11.44295 | 11.64948 | 0.194   | -0.0923  | 0.00218  | 0.000415 | 1.706916 | 9  |
| 10515_at  | YKR043C |        | 9.557691 | 9.613503 | 9.99116  | 9.498728 | 9.498747 | 9.922041 | 9.039008 | 9.009946 | 9.28466  | 8.937988 | 8.864596 | 8.805887 | 8.180711 | 8.565284 | 8.570886 | 9.059611 | -0.355  | 0.0108   | 2.69E-05 | 1.04E-05 | 2.566017 | 16 |
| 10516_at  | YKR044W | UIP5   | 4.91417  | 4.942284 | 5.57653  | 4.92745  | 5.070427 | 5.262203 | 5.031739 | 5.231304 | 5.140766 | 5.257897 | 4.938572 | 4.984418 | 4.680963 | 4.971032 | 4.900399 | 5.082902 | -0.072  | -0.0243  | 0.177    | 0.019343 | 1.210369 | 13 |
| 10517_at  | YKR045C |        | 5.153807 | 5.000197 | 5.605868 | 4.881214 | 4.772424 | 5.158158 | 4.70253  | 4.683103 | 5.369571 | 5.51709  | 5.217197 | 5.022559 | 4.522439 | 5.171022 | 4.936691 | 5.03704  | 0.0984  | 0.933    | 0.0422   | 0.005577 | 1.469042 | 13 |
| 10518_at  | YKR046C | PET10  | 8.52618  | 8.3185   | 8.19426  | 10.55528 | 10.23282 | 10.09022 | 10.87356 | 10.91335 | 11.00363 | 11.19481 | 11.26459 | 11.3625  | 10.15153 | 10.50391 | 10.3416  | 11.25659 | 0.508   | -0.525   | 2.01E-10 | 5.24E-09 | 8.06289  | 10 |
| 10519_at  | YKR047W |        | 6.796694 | 6.763739 | 6.976127 | 6.725091 | 6.887318 | 6.987706 | 6.30823  | 6.368947 | 6.765462 | 6.331744 | 6.821921 | 6.711044 | 6.717884 | 7.518522 | 7.27145  | 6.619574 | 0.0664  | 0.111    | 0.0393   | 0.005228 | 1.446409 | 13 |
| 10520_at  | YKR048C | NAP1   | 9.375618 | 9.13037  | 9.36783  | 9.128587 | 9.208716 | 9.174776 | 8.934554 | 8.368567 | 9.167255 | 10.03461 | 9.391003 | 9.119094 | 10.40018 | 10.20893 | 9.947544 | 9.321788 | 0.245   | 0.113    | 0.000229 | 6.08E-05 | 2.016979 | 8  |
| 10521_at  | YKR049C | FMP46  | 8.077271 | 8.060795 | 9.100516 | 10.6007  | 10.62299 | 10.87512 | 10.777   | 10.78933 | 10.96125 | 10.70446 | 10.30534 | 10.51673 | 9.196129 | 9.639822 | 9.495261 | 10.97078 | 0.187   | -0.548   | 1.56E-05 | 6.66E-06 | 5.084642 | 11 |
| 10522_at  | YKR050W | TRK2   | 5.258786 | 5.244725 | 5.672296 | 5.115979 | 5.077733 | 5.196344 | 5.238635 | 5.429406 | 5.301667 | 5.006812 | 5.454555 | 5.644169 | 5.042362 | 5.0633   | 5.316827 | 5.527285 | -0.0416 | -0.0025  | 0.613    | 0.01077  | 1.116502 | 13 |
| 10523_at  | YKR051W |        | 6.129745 | 6.121065 | 6.544613 | 6.153411 | 6.253514 | 6.178822 | 6.446105 | 6.203908 | 6.484004 | 6.592896 | 6.243395 | 6.698336 | 6.054261 | 5.706693 | 5.715175 | 6.390828 | -0.0805 | -0.0995  | 0.0155   | 0.002278 | 1.444642 | 16 |
| 10524_at  | YKR052C | MRS4   | 7.847039 | 7.003032 | 6.607739 | 7.555567 | 7.704656 | 6.843541 | 7.476572 | 7.512858 | 7.9021   | 7.436106 | 7.078572 |          |          |          |          |          |         |          |          |          |          |    |

|            |         |        |          |          |          |          |          |          |          |          |          |          |          |          |           |          |          |          |         |          |          |          |          |    |
|------------|---------|--------|----------|----------|----------|----------|----------|----------|----------|----------|----------|----------|----------|----------|-----------|----------|----------|----------|---------|----------|----------|----------|----------|----|
| 10556_i_at | YKL006W | RPL14A | 11.10004 | 11.54437 | 11.60101 | 10.83303 | 10.88661 | 11.25888 | 10.01522 | 10.06225 | 9.872451 | 8.244719 | 9.593293 | 9.265186 | 7.77378   | 7.939529 | 7.781871 | 9.611401 | -0.988  | 0.014    | 3.4E-07  | 3.89E-07 | 13.71565 | 20 |
| 10557_f_at | YKL006W | RPL14A | 12.1948  | 12.42569 | 12.48623 | 12.03943 | 12.03943 | 12.23628 | 11.45229 | 11.24679 | 11.28318 | 10.0442  | 10.43768 | 10.56646 | 9.04695   | 9.440343 | 9.409913 | 10.93203 | -0.858  | -0.017   | 2.9E-08  | 7.61E-08 | 9.710643 | 18 |
| 10558_s_a  | YKL006W | RPL14A | 11.8577  | 12.02929 | 12.24189 | 11.85744 | 11.86704 | 11.95603 | 11.46258 | 11.26361 | 11.27815 | 10.55496 | 10.78104 | 11.0394  | 10.27362  | 10.49331 | 10.51683 | 11.13554 | -0.467  | 0.0374   | 1.68E-06 | 1.24E-06 | 3.448895 | 16 |
| 10559_at   | YKL005C | BYE1   | 6.451289 | 6.34273  | 6.091722 | 6.392806 | 6.048329 | 6.522248 | 6.700599 | 6.350828 | 6.729447 | 6.832105 | 6.678568 | 6.937961 | 7.491191  | 7.509251 | 6.573609 | 0.371    | 0.104   | 5.1E-06  | 2.85E-06 | 2.673943 | 8        |    |
| 10560_at   | YKL004W | AUR1   | 9.205582 | 9.341888 | 9.147059 | 8.863365 | 8.789681 | 8.866321 | 9.098896 | 8.989648 | 8.810772 | 9.321288 | 9.292296 | 9.226681 | 10.10395  | 9.979551 | 10.52942 | 9.129002 | 0.287   | 0.157    | 8.23E-06 | 4.08E-06 | 2.385536 | 8  |
| 10561_at   | YKL003C | MRP17  | 8.822585 | 8.933301 | 9.332149 | 9.70196  | 9.634355 | 9.719073 | 9.750212 | 9.415017 | 9.355471 | 9.652663 | 9.333793 | 9.900587 | 9.053289  | 9.562975 | 9.034242 | 9.677595 | 0.0346  | -0.148   | 0.00917  | 0.001439 | 1.512676 | 12 |
| 10562_at   | YKL002W | DID4   | 8.55415  | 8.483734 | 8.938749 | 8.548218 | 8.638575 | 8.047522 | 8.754339 | 8.532242 | 8.193974 | 9.086524 | 8.160218 | 8.046411 | 8.049736  | 8.538982 | 7.981498 | 8.411501 | -0.108  | 0.00108  | 0.31     | 0.033098 | 1.331643 | 13 |
| 10563_at   | YKL001C | MET14  | 11.18313 | 10.9542  | 11.29653 | 10.71587 | 10.74832 | 10.86115 | 10.02835 | 9.969517 | 9.746224 | 9.785138 | 9.319758 | 8.741593 | 9.843927  | 10.13206 | 9.663287 | 9.710044 | -0.402  | 0.232    | 0.00033  | 8.25E-05 | 3.342736 | 14 |
| 10564_at   | YKR001C | VPS1   | 6.513032 | 6.938524 | 5.997524 | 6.558737 | 6.612588 | 6.802895 | 6.668905 | 6.786074 | 6.636869 | 6.295195 | 6.386145 | 6.492683 | 5.604768  | 5.921361 | 5.980874 | 6.542984 | -0.177  | -0.105   | 0.000925 | 0.000199 | 1.735259 | 15 |
| 10565_at   | YKR002W | PAP1   | 7.087487 | 7.193849 | 7.354106 | 7.374789 | 7.103646 | 7.380133 | 7.228941 | 7.470574 | 7.236304 | 7.7083   | 7.493829 | 7.688969 | 8.171118  | 8.927835 | 8.479784 | 7.4847   | 0.341   | 0.106    | 1.84E-06 | 1.33E-06 | 2.467318 | 8  |
| 10566_at   | YKR003W | OSH6   | 7.347359 | 7.287557 | 6.736188 | 7.238466 | 7.134493 | 6.861093 | 6.628474 | 6.860413 | 6.697901 | 5.757077 | 5.956249 | 5.940809 | 5.48011   | 5.988959 | 5.564555 | 6.377831 | -0.439  | 0.0144   | 5.29E-05 | 1.81E-05 | 3.199356 | 16 |
| 10567_at   | YKR004C | ECM9   | 4.784661 | 4.741252 | 4.328439 | 5.42667  | 5.220998 | 5.237893 | 5.417498 | 5.446099 | 5.100698 | 5.314457 | 5.397658 | 5.76301  | 5.537164  | 6.109797 | 6.195267 | 5.503508 | 0.321   | -0.0566  | 0.000101 | 3.08E-05 | 2.343988 | 7  |
| 10568_at   | YKR005C |        | 4.864069 | 4.842582 | 4.608775 | 5.101662 | 5.023798 | 5.249875 | 5.610386 | 5.576163 | 5.30471  | 6.335306 | 5.771965 | 5.501976 | 6.649375  | 6.775822 | 6.120987 | 5.677214 | 0.463   | -0.0116  | 4.6E-06  | 2.63E-06 | 3.414557 | 7  |
| 10569_at   | YKR006C | MRPL13 | 7.312631 | 7.522197 | 7.207005 | 8.203337 | 8.502171 | 8.146228 | 8.451147 | 8.116201 | 8.29276  | 8.222174 | 8.071525 | 8.051571 | 6.898915  | 7.288485 | 6.950538 | 8.322764 | -0.102  | -0.305   | 5.08E-07 | 5.19E-07 | 2.400328 | 12 |
| 10570_at   | YKR007W | MEH1   | 6.456149 | 6.412262 | 7.244346 | 6.953068 | 6.819733 | 7.032498 | 6.525525 | 6.791291 | 6.767531 | 7.047651 | 6.642413 | 6.44473  | 6.805858  | 7.091838 | 6.590049 | 6.775029 | 0.0134  | 0.00167  | 0.97     | 0.092583 | 1.0361   | 13 |
| 10571_at   | YKR008W | RSC4   | 4.403738 | 4.242949 | 4.104409 | 4.310398 | 4.066312 | 3.755271 | 4.27309  | 4.120699 | 4.084957 | 4.552307 | 4.351557 | 3.964999 | 5.711658  | 5.254305 | 5.211745 | 4.196079 | 0.314   | 0.183    | 3.08E-06 | 1.96E-06 | 2.64729  | 8  |
| 10572_at   | YKR009C | FOX2   | 6.196514 | 5.733289 | 6.519721 | 7.195011 | 6.887916 | 7.076699 | 7.473935 | 7.950069 | 8.078085 | 7.655509 | 7.622357 | 7.232557 | 7.543031  | 7.22838  | 7.780256 | 0.294    | -0.32   | 8.57E-05 | 2.68E-05 | 3.485014 | 10       |    |
| 10573_at   | YKR010C | TOF2   | 5.90772  | 5.819748 | 6.06217  | 5.465641 | 5.509277 | 5.687415 | 5.035053 | 5.695936 | 5.41859  | 5.240448 | 5.76842  | 5.204459 | 5.509665  | 5.751048 | 5.462287 | 5.389563 | -0.0823 | 0.0987   | 0.0205   | 0.00293  | 1.449332 | 13 |
| 10574_at   | YKR011C |        | 6.335101 | 6.391568 | 6.875697 | 7.269342 | 7.028939 | 6.878713 | 7.161738 | 7.088165 | 6.822976 | 7.386248 | 6.915581 | 7.194555 | 6.9371147 | 6.47654  | 7.993267 | 7.171732 | 0.412   | 0.0702   | 1.45E-05 | 6.31E-06 | 2.982263 | 7  |
| 10575_at   | YKR012C |        | 5.426774 | 5.412487 | 6.573049 | 5.532941 | 5.648213 | 5.745314 | 5.843307 | 5.802024 | 5.912168 | 6.175173 | 6.159701 | 6.016192 | 6.191171  | 6.414233 | 6.079248 | 6.003194 | 0.156   | -0.00251 | 0.145    | 0.016754 | 1.510447 | 13 |
| 10576_at   | YKR013W | PRY2   | 6.868254 | 7.127133 | 7.191502 | 6.982615 | 6.865442 | 6.918688 | 6.221423 | 6.580228 | 5.600364 | 5.270354 | 5.3318   | 5.367452 | 6.274138  | 6.407866 | 6.216531 | 6.007453 | -0.276  | 0.311    | 0.0027   | 0.000499 | 3.905979 | 14 |
| 10577_at   | YKR014C | YPT52  | 8.833393 | 8.972661 | 8.963946 | 8.952065 | 9.117178 | 8.558891 | 9.113397 | 9.022274 | 9.274922 | 10.07028 | 9.466293 | 9.754511 | 9.767373  | 9.77434  | 10.10742 | 9.384968 | 0.3     | -0.0016  | 0.000519 | 0.000122 | 2.215803 | 7  |
| 10578_at   | YKR015C |        | 3.458333 | 3.571975 | 4.391403 | 3.504716 | 3.851708 | 3.535301 | 3.644502 | 3.321305 | 3.575377 | 3.694566 | 3.342568 | 3.199908 | 3.370625  | 3.20896  | 3.22907  | 3.456188 | -0.141  | 0.0229   | 0.0543   | 0.006983 | 1.452026 | 16 |
| 10579_at   | YKL028W | TFA1   | 7.467644 | 7.659848 | 7.469355 | 7.619241 | 7.393937 | 7.15589  | 7.211368 | 7.422115 | 7.1192   | 7.19579  | 7.058967 | 7.84501  | 6.503327  | 7.041407 | 6.577837 | 7.1438   | -0.22   | -0.00542 | 0.000267 | 6.92E-05 | 1.796829 | 16 |
| 10580_at   | YKL027W |        | 6.612832 | 6.66363  | 6.333662 | 6.166709 | 6.304469 | 6.241814 | 6.008889 | 5.916637 | 5.759201 | 6.007784 | 5.73012  | 5.266044 | 5.217000  | 5.701687 | 5.318214 | 5.789214 | -0.303  | 0.0533   | 8.39E-05 | 2.64E-05 | 2.234842 | 16 |
| 10581_at   | YKL026C | GPX1   | 6.665636 | 6.464115 | 6.589696 | 6.108792 | 7.954361 | 6.225899 | 6.923259 | 6.823588 | 6.787918 | 9.319716 | 9.213217 | 9.090036 | 8.809008  | 9.291842 | 9.255368 | 9.122625 | 0.661   | -0.347   | 1.94E-09 | 1.47E-08 | 6.700747 | 4  |
| 10582_at   | YKL025C | PAN3   | 5.026118 | 5.05727  | 5.280345 | 5.178241 | 5.033754 | 5.423531 | 5.552697 | 5.066807 | 5.047458 | 5.637449 | 5.538663 | 5.287847 | 4.722421  | 5.539507 | 5.182945 | 5.350268 | 0.0181  | -0.0679  | 0.26     | 0.02821  | 1.213294 | 13 |
| 10583_at   | YKL024C | URA6   | 6.890496 | 8.936925 | 9.635215 | 9.230576 | 8.995955 | 9.010605 | 9.063328 | 8.85012  | 9.102373 | 9.359697 | 9.545594 | 9.247415 | 9.959557  | 9.801321 | 9.6252   | 9.283065 | 0.0964  | 0.000938 | 0.453    | 0.046624 | 1.291097 | 13 |
| 10584_at   | YKL023W |        | 4.602435 | 4.424506 | 5.036856 | 4.87763  | 4.480801 | 5.572317 | 5.625941 | 5.591031 | 5.661317 | 6.151338 | 6.718364 | 6.498171 | 6.017876  | 6.495597 | 7.058406 | 6.010671 | 0.555   | -0.122   | 0.000173 | 4.81E-05 | 3.449853 | 7  |
| 10585_at   | YKL022C | CDC16  | 3.227776 | 3.183185 | 3.923012 | 3.40641  | 3.313404 | 3.976295 | 3.557104 | 3.80561  | 3.683862 | 4.376746 | 4.144749 | 4.246029 | 3.864768  | 4.501846 | 4.940614 | 3.952918 | 0.292   | -0.00717 | 0.00424  | 0.000738 | 2.166573 | 7  |
| 10586_at   | YKL021C | MAK11  | 5.883355 | 5.715939 | 5.57127  | 5.046119 | 5.20962  | 4.80057  | 5.049886 | 5.157099 | 4.845242 | 5.04519  | 4.683511 | 4.424274 | 4.46746   | 4.419302 | 4.08237  | 4.770606 | -0.348  | 0.0661   | 0.00001  | 4.76E-06 | 2.514729 | 16 |
| 10587_at   | YKL020C | SP723  | 5.850453 | 6.264239 | 6.22508  | 6.733338 | 6.553874 | 6.535525 | 6.783215 | 6.448547 | 6.825996 | 6.784605 | 6.978819 | 7.343201 | 7.855347  | 7.591407 | 7.662954 | 6.91977  | 0.405   | -0.00159 | 6.74E-07 | 6.32E-07 | 2.925974 | 7  |
| 10588_at   | YKL019W | RAM2   | 7.483875 | 7.230535 | 7.497989 | 7.646578 | 7.520052 | 7.535694 | 7.907728 | 7.729872 | 7.83194  | 8.474836 | 8.289949 | 8.308268 | 9.67185   | 7.444636 | 7.055486 | 8.033659 | 0.00211 | -0.214   | 0.00249  | 0.000465 | 1.684791 | 12 |
| 10589_at   | YKL018W | SWD2   | 5.961542 | 5.87892  | 6.425843 | 6.048668 | 6.282726 | 5.581237 | 5.319298 | 5.674948 | 5.547586 | 5.593607 | 5.514112 | 5.598508 | 5.229162  | 5.476505 | 5.176807 | 5.54233  | -0.197  | 0.0413   | 0.00167  | 0.000033 | 1.686292 | 16 |
| 10590_at   | YKL017C | HCS1   | 6.355475 | 6.221099 | 6.804936 | 6.598667 | 6.697538 | 6.802502 | 6.170635 | 6.31704  | 6.513483 | 6.557062 | 6.458219 | 6.419895 | 5.895971  | 6.266292 | 6.06168  | 6.426424 | -0.0888 | -0.0431  | 0.0758   | 0.009394 | 1.294627 | 13 |
| 10591_at   | YKL016C | ATP7   | 4.674497 | 5.039236 | 6.098832 | 6.975276 | 6.873434 | 6.897221 | 6.436509 | 6.357969 | 7.241618 | 5.906483 | 6.087935 | 7.189877 | 4.84624   | 5.149686 | 5.742478 | 6.796642 | -0.0714 | -0.41    | 0.00231  | 0.000436 | 2.90659  | 11 |
| 10592_at   | YKL015W | PJT3   | 6.160874 | 6.163769 | 6.633953 | 5.995371 | 5.952513 | 5.874561 | 5.709685 | 5.502565 | 5.775252 | 5.67782  | 6.245993 | 6.611837 | 7.753801  | 7.306822 | 7.466349 | 6.050343 | 0.345   | 0.235    | 3.82E-06 | 2.30E-06 | 3.115357 | 8  |
| 10593_at   | YKL014C | URB1   | 5.278692 | 5.66453  | 5.8328   | 4.552429 | 4.75345  | 4.840482 | 4.387609 | 4.452336 | 3.961601 | 3.913571 | 3.581816 | 3.777694 | 3.938885  | 3.928371 | 3.663719 | 3.939806 | -0.466  | 0.214    | 8.47E-08 | 1.55E-07 | 3.558568 | 14 |
| 10594_at   | YKL013C | ARC19  | 7.912413 | 7.969128 | 8.794172 | 8.354012 | 8.396455 | 8.433146 | 7.749719 | 7.676055 | 7.851562 | 7.417561 | 7.312417 | 7.466636 | 6.833119  | 6.843668 | 7.307691 | 7.776512 | -0.35   | -0.0385  | 0.000719 | 0.00016  | 2.579272 | 16 |
| 10595_at   | YKL012W | PRP40  | 6.158639 | 6.815543 | 6.229742 | 5.901384 | 6.02033  | 5.642009 | 5.791218 | 5.925935 | 5.778321 | 6.630813 | 6.164716 | 6.093823 | 6.376262  | 6.466282 | 6.321077 | 6.025823 | 0.118   | 0.0524   | 0.0313   | 0.004277 | 1.396188 | 13 |
| 10596_at   | YKL011C | CCE1   | 5.474543 | 4.745202 | 5.250234 | 4.670925 | 4.639031 | 5.494009 | 4.290334 | 4.20747  |          |          |          |          |           |          |          |          |         |          |          |          |          |    |



|          |         |        |          |          |          |           |          |          |          |          |          |          |          |          |          |          |          |          |         |          |          |          |          |    |
|----------|---------|--------|----------|----------|----------|-----------|----------|----------|----------|----------|----------|----------|----------|----------|----------|----------|----------|----------|---------|----------|----------|----------|----------|----|
| 10628_at | YKL068W | NUP100 | 5.503994 | 5.588845 | 5.641954 | 5.142927  | 5.347879 | 4.843331 | 5.093681 | 5.110207 | 4.953815 | 5.530351 | 5.554022 | 5.518214 | 7.193362 | 6.508549 | 6.010715 | 5.239461 | 0.283   | 0.226    | 3.75E-05 | 1.36E-05 | 2.742823 | 8  |
| 10629_at | YKL067W | YNK1   | 5.912663 | 9.623214 | 9.86509  | 10.45808  | 10.52533 | 10.45793 | 10.4898  | 10.4103  | 10.59266 | 9.777198 | 10.34002 | 10.44963 | 9.880565 | 6.633279 | 10.01833 | 10.4611  | 0.00229 | -0.188   | 0.00243  | 0.000455 | 1.579892 | 12 |
| 10630_at | YKL066W |        | 7.042778 | 7.083296 | 7.669085 | 7.595248  | 7.607354 | 7.574545 | 7.496004 | 7.286587 | 7.315633 | 7.322472 | 7.678369 | 7.557164 | 7.866378 | 8.128491 | 7.890117 | 7.527479 | 0.162   | 0.0288   | 0.00573  | 0.000059 | 1.536972 | 13 |
| 10631_at | YKL065C | YET1   | 8.605559 | 8.767931 | 8.9687   | 8.671765  | 8.641652 | 8.697047 | 8.767877 | 8.464292 | 8.619582 | 8.233674 | 8.343346 | 8.591135 | 7.965289 | 8.473454 | 8.225214 | 8.499838 | -0.165  | 0.00124  | 0.0018   | 0.000352 | 1.506304 | 16 |
| 10632_at | YKL064W | MNR2   | 7.796117 | 7.919289 | 7.450498 | 8.38343   | 7.98514  | 7.948169 | 8.333196 | 8.285    | 8.156463 | 8.214277 | 8.230736 | 8.648767 | 9.026629 | 8.247693 | 9.132601 | 8.354806 | 0.351   | 0.0239   | 6.13E-06 | 3.28E-06 | 2.528842 | 7  |
| 10633_at | YKL063C |        | 7.946062 | 8.11172  | 8.187308 | 8.27461   | 8.74161  | 8.767584 | 8.029818 | 8.137711 | 7.784532 | 8.428847 | 7.904058 | 8.052223 | 8.073042 | 8.182823 | 8.13574  | 7.985185 | 0.0238  | 0.0191   | 0.7      | 0.068922 | 1.034897 | 13 |
| 10634_at | YKL062W | MSN4   | 7.030389 | 6.801555 | 6.01676  | 7.243245  | 7.343608 | 6.506391 | 7.552036 | 7.650295 | 7.941777 | 7.371867 | 7.259035 | 7.136558 | 6.527157 | 7.164939 | 6.562528 | 7.445258 | 0.0243  | -0.11    | 0.0247   | 0.00346  | 1.733477 | 12 |
| 10635_at | YKL061W |        | 5.078435 | 4.851641 | 5.368094 | 5.452124  | 5.328812 | 5.315353 | 5.445943 | 5.500138 | 5.185325 | 5.690184 | 5.186032 | 5.348309 | 4.839578 | 5.211489 | 4.756805 | 5.418928 | -0.0395 | -0.211   | 0.0103   | 0.001599 | 1.3777   | 12 |
| 10636_at | YKL060C | FBA1   | 12.4294  | 12.54942 | 12.67429 | 12.44582  | 12.50281 | 12.75067 | 12.59807 | 12.64505 | 12.76654 | 12.7193  | 12.61397 | 12.83146 | 12.17026 | 12.57342 | 12.69442 | 12.67564 | -0.0065 | -0.0458  | 0.237    | 0.025983 | 1.124804 | 13 |
| 10637_at | YKL059C | MPE1   | 8.781875 | 8.71138  | 8.701229 | 8.510443  | 8.517529 | 8.581031 | 8.568155 | 8.930114 | 8.516867 | 9.04043  | 8.886317 | 8.316031 | 8.568957 | 8.956531 | 8.46635  | 8.656662 | 0.00187 | 0.00806  | 0.975    | 0.092948 | 1.021962 | 13 |
| 10638_at | YKL058W | TOA2   | 8.283234 | 7.917642 | 8.320095 | 8.579479  | 8.493694 | 8.976596 | 8.28473  | 8.36927  | 8.479046 | 8.413305 | 8.07974  | 8.578106 | 7.728276 | 8.09611  | 8.238945 | 8.48176  | -0.064  | -0.1     | 0.0414   | 0.005482 | 1.405463 | 12 |
| 10639_at | YKL057C | NUP120 | 6.060698 | 6.12715  | 5.966494 | 5.963391  | 5.820376 | 6.149599 | 5.755315 | 5.910095 | 5.527114 | 5.32649  | 5.050316 | 5.053212 | 6.119323 | 5.995591 | 5.708583 | 5.499343 | -0.0925 | 0.144    | 0.0201   | 0.002876 | 1.643628 | 14 |
| 10640_at | YKL056C | TMA19  | 12.25844 | 12.13656 | 12.28351 | 12.39695  | 12.40722 | 12.58635 | 12.36065 | 12.68618 | 12.46974 | 12.29364 | 12.14866 | 12.2124  | 10.19702 | 10.79908 | 10.20611 | 12.36385 | -0.46   | -0.29    | 4.35E-09 | 2.25E-08 | 4.337759 | 17 |
| 10641_at | YKL055C | OAR1   | 5.621538 | 5.093363 | 4.823829 | 4.908275  | 4.759292 | 5.0117   | 4.80303  | 5.322932 | 5.374108 | 4.979746 | 5.018852 | 4.66331  | 5.425449 | 5.680464 | 5.296402 | 4.962446 | 0.0637  | 0.0973   | 0.0739   | 0.009020 | 1.395799 | 13 |
| 10642_at | YKL054C | DEF1   | 8.582256 | 8.469829 | 7.977587 | 8.402795  | 8.404933 | 8.201828 | 8.394921 | 8.536764 | 8.201497 | 9.384322 | 8.97003  | 8.64283  | 9.860658 | 10.09351 | 9.779687 | 8.678202 | 0.43    | 0.121    | 2.09E-06 | 1.46E-06 | 3.129105 | 7  |
| 10643_at | YKL053C | MDM35  | 9.857468 | 9.871962 | 10.34419 | 10.103991 | 11.11345 | 11.11905 | 10.10521 | 10.90085 | 11.07194 | 11.01854 | 11.81235 | 11.19666 | 10.5433  | 10.76006 | 10.7472  | 11.17128 | 0.134   | -0.218   | 9.52E-05 | 2.94E-05 | 2.01506  | 12 |
| 10644_at | YKL053W |        | 6.935059 | 6.883014 | 7.000337 | 6.716744  | 6.669509 | 6.73468  | 6.840506 | 6.476399 | 6.786528 | 6.622935 | 6.940419 | 6.601743 | 7.205668 | 7.61402  | 7.339684 | 6.69109  | 0.111   | 0.13     | 5.83E-05 | 1.96E-05 | 1.632002 | 13 |
| 10645_at | YKL052C | ASK1   | 7.922625 | 7.965053 | 8.50192  | 8.196986  | 8.062422 | 8.205951 | 8.006119 | 7.909499 | 7.965626 | 9.030584 | 8.383116 | 7.8223   | 9.288023 | 9.268837 | 8.925396 | 8.218526 | 0.273   | 0.118    | 0.000783 | 0.000172 | 2.15147  | 8  |
| 10646_at | YKL093W | MBR1   | 4.994503 | 4.875902 | 5.256353 | 5.570642  | 5.621813 | 6.636307 | 6.199785 | 6.21512  | 6.19249  | 7.148433 | 7.11377  | 6.55338  | 10.44257 | 9.901763 | 9.502864 | 6.594884 | 1.26    | 0.247    | 2.24E-10 | 5.33E-09 | 2.789519 | 3  |
| 10647_at | YKL092C | BUD2   | 4.211262 | 4.206477 | 4.524303 | 4.316449  | 4.198814 | 4.017684 | 4.240617 | 3.861924 | 3.936604 | 3.751344 | 3.974071 | 3.960615 | 4.026424 | 4.253374 | 3.782674 | 3.966331 | -0.0862 | 0.0579   | 0.0322   | 0.004384 | 1.321321 | 13 |
| 10648_at | YKL091C |        | 7.103034 | 6.937605 | 7.360116 | 7.82236   | 7.982209 | 7.364046 | 7.917374 | 7.987502 | 7.945027 | 8.574812 | 7.80146  | 7.817274 | 7.150299 | 7.312041 | 7.423086 | 7.829514 | 0.0294  | -0.169   | 0.000673 | 0.000151 | 1.572781 | 12 |
| 10649_at | YKL090W | CUE2   | 4.637768 | 4.588515 | 5.143586 | 4.512179  | 4.821513 | 4.609391 | 5.133198 | 5.025535 | 4.765733 | 5.364007 | 4.999503 | 4.834605 | 4.709585 | 4.927625 | 4.661459 | 4.940883 | 0.0241  | -0.05    | 0.46     | 0.047197 | 1.173195 | 13 |
| 10650_at | YKL089W | MIF2   | 5.779908 | 5.849065 | 6.343363 | 6.072238  | 6.18647  | 5.739017 | 6.487537 | 6.285647 | 5.745293 | 6.806373 | 6.211421 | 6.168489 | 6.453923 | 6.801722 | 6.251074 | 6.253369 | 0.151   | -0.00472 | 0.0749   | 0.009313 | 1.493832 | 13 |
| 10651_at | YKL088W |        | 5.81505  | 5.447451 | 5.003093 | 5.798036  | 5.591252 | 5.365056 | 5.798611 | 6.317038 | 5.819307 | 6.165024 | 5.859892 | 5.914415 | 6.445649 | 6.302553 | 5.850192 | 5.94931  | 0.205   | -0.0392  | 0.0123   | 0.001866 | 1.722579 | 9  |
| 10652_at | YKL087C | CYT2   | 7.518977 | 7.591943 | 7.746656 | 8.842382  | 8.64382  | 8.837651 | 9.441455 | 9.098613 | 9.176961 | 9.380134 | 9.180767 | 9.663016 | 10.05906 | 8.845246 | 7.835869 | 9.395954 | 0.244   | -0.361   | 1.1E-06  | 9.09E-07 | 3.549455 | 10 |
| 10653_at | YKL086W | SRX1   | 6.149058 | 6.32107  | 6.680012 | 6.165625  | 6.48509  | 6.468258 | 6.142768 | 6.498704 | 6.470489 | 7.30356  | 7.007896 | 6.651304 | 8.358242 | 8.88673  | 8.059331 | 6.672149 | 0.559   | 0.199    | 2.49E-07 | 3.07E-07 | 4.406331 | 6  |
| 10654_at | YKL085W | MDH1   | 9.891745 | 10.14555 | 10.17963 | 11.36864  | 11.28793 | 10.95617 | 11.60879 | 11.61301 | 11.32489 | 11.24821 | 10.92901 | 11.16342 | 9.93769  | 10.39022 | 10.51605 | 11.42662 | 0.0137  | -0.338   | 1.87E-05 | 7.73E-06 | 2.312707 | 12 |
| 10655_at | YKL084W | DEF1   | 6.927407 | 6.831236 | 6.850375 | 7.125452  | 6.86532  | 6.765382 | 6.740579 | 6.933466 | 6.94143  | 7.000887 | 6.799662 | 7.240762 | 7.70178  | 8.164139 | 7.430704 | 7.055274 | 0.7     | 0.0783   | 0.00822  | 0.001313 | 1.727018 | 8  |
| 10656_at | YKL082C | RRP14  | 7.732924 | 8.427233 | 8.977761 | 8.590865  | 8.236716 | 6.997773 | 8.532999 | 8.869559 | 8.064385 | 9.573009 | 8.220322 | 8.096918 | 8.93065  | 8.261089 | 8.212972 | 8.426422 | -0.0183 | 0.0374   | 0.893    | 0.085734 | 1.12731  | 13 |
| 10657_at | YKL083W |        | 6.070629 | 6.011467 | 7.321294 | 6.612814  | 6.800916 | 6.717265 | 6.71985  | 7.08254  | 6.59883  | 6.869178 | 5.875024 | 7.271945 | 6.948545 | 6.622033 | 6.647794 | -0.0505  | 0.108   | 0.161    | 0.018353 | 1.406998 | 13       |    |
| 10658_at | YKL081W | TEF4   | 7.858592 | 7.418391 | 6.464152 | 5.573341  | 5.956551 | 5.754153 | 5.941995 | 6.038192 | 5.988892 | 5.581724 | 6.01717  | 4.667346 | 5.046847 | 4.999449 | 4.685123 | 5.359428 | -0.589  | 0.191    | 3.01E-05 | 1.14E-05 | 4.766809 | 18 |
| 10659_at | YKL081W | TEF4   | 9.017558 | 8.951158 | 8.96144  | 7.575562  | 8.282075 | 7.890294 | 7.011242 | 6.925743 | 7.010186 | 6.425396 | 6.078191 | 6.614028 | 6.420669 | 6.196935 | 5.739494 | 6.677267 | -0.85   | 0.198    | 4.72E-08 | 1.05E-07 | 5.90921  | 20 |
| 10660_at | YKL080W | VMA5   | 9.761185 | 9.758497 | 9.82476  | 9.743461  | 9.640126 | 9.5535   | 9.024845 | 8.726151 | 9.29696  | 8.111682 | 8.50151  | 8.838566 | 8.256447 | 8.649483 | 8.644660 | 8.844083 | -0.38   | 0.0901   | 0.000215 | 5.76E-05 | 2.737644 | 16 |
| 10661_at | YKL079W | SMY1   | 6.566053 | 6.283013 | 6.797017 | 6.568988  | 6.665418 | 6.291057 | 6.291785 | 6.598368 | 6.423433 | 6.822054 | 6.591    | 6.035547 | 6.888382 | 7.301672 | 6.791372 | 6.543636 | 0.12    | 0.0624   | 0.00931  | 0.001459 | 1.429643 | 13 |
| 10662_at | YKL078W | DHR2   | 5.913654 | 5.889161 | 6.339298 | 5.96371   | 5.625395 | 5.524714 | 5.106887 | 5.41113  | 5.31099  | 5.489349 | 5.173656 | 4.909497 | 5.742853 | 5.714251 | 5.396287 | 5.224751 | -0.12   | 0.168    | 0.000364 | 8.95E-05 | 1.823541 | 14 |
| 10663_at | YKL077W |        | 9.258565 | 8.916707 | 8.617954 | 8.658471  | 8.729383 | 8.592551 | 8.35468  | 8.45939  | 8.638534 | 8.259044 | 8.050065 | 7.851778 | 7.128841 | 7.375262 | 7.246723 | 8.255694 | -0.443  | -0.0443  | 9.73E-08 | 1.69E-07 | 3.239268 | 16 |
| 10664_at | YKL076C | PSY1   | 6.508792 | 6.579018 | 7.339985 | 7.042342  | 6.868121 | 6.829485 | 6.71195  | 6.785879 | 6.894398 | 7.009083 | 6.757751 | 6.806256 | 7.655872 | 7.264922 | 6.820066 | 6.869376 | 0.0273  | 0.00449  | 0.842    | 0.08135  | 1.075014 | 13 |
| 10665_g  | YKL076C | PSY1   | 5.981896 | 5.999174 | 6.609373 | 6.401253  | 6.603728 | 5.983057 | 6.339763 | 6.177852 | 6.167515 | 6.618596 | 6.087001 | 5.998777 | 5.699271 | 5.780054 | 5.720263 | 6.285966 | -0.111  | -0.0879  | 0.0389   | 0.005185 | 1.484442 | 12 |
| 10666_at | YKL075C |        | 6.315275 | 5.899653 | 5.941892 | 6.069032  | 6.104575 | 5.508615 | 6.287704 | 6.389392 | 5.931274 | 6.7438   | 6.138442 | 6.438407 | 5.600138 | 5.208755 | 5.186281 | 6.103463 | -0.119  | 0.0256   | 0.003559 | 1.710357 | 16       |    |
| 10667_at | YKL074C | MUD2   | 6.934218 | 6.385367 | 7.068132 | 6.770127  | 6.915461 | 6.533844 | 6.735858 | 6.939208 | 6.575523 | 7.213944 | 6.752119 | 6.790162 | 6.947184 | 6.763782 | 6.893541 | 6.820235 | 0.0333  | 0.0017   | 0.751    | 0.073536 | 1.092376 | 13 |
| 10668_at | YKL073W | LMS1   | 6.989669 | 6.944318 | 7.45719  | 6.668647  | 6.752406 | 6.730058 | 6.341771 | 6.452174 | 6.645647 | 6.997355 | 6.554675 | 6.594467 |          |          |          |          |         |          |          |          |          |    |

|          |         |         |          |          |          |          |          |           |          |          |          |          |          |          |          |          |          |          |          |           |          |          |          |          |    |
|----------|---------|---------|----------|----------|----------|----------|----------|-----------|----------|----------|----------|----------|----------|----------|----------|----------|----------|----------|----------|-----------|----------|----------|----------|----------|----|
| 10700_at | YKL128C | PMU1    | 8.878758 | 8.470264 | 8.81226  | 8.813252 | 9.019187 | 8.596909  | 8.275433 | 8.25129  | 8.134412 | 7.958032 | 7.222877 | 7.451865 | 6.750199 | 6.584242 | 6.65081  | 8.065615 | -0.57    | -0.0956   | 2.08E-07 | 2.77E-07 | 4.532248 | 18       |    |
| 10701_at | YKL127W | PGM1    | 6.999907 | 7.74608  | 7.047603 | 6.480831 | 6.397976 | 6.423353  | 5.829005 | 5.674453 | 5.88907  | 5.549272 | 5.800254 | 7.878786 | 5.322844 | 5.246499 | 5.209435 | 5.788951 | -0.431   | 0.0865    | 8.67E-07 | 7.62E-07 | 3.133008 | 16       |    |
| 10702_at | YKL126W | YPK1    | 8.704319 | 8.774998 | 9.245984 | 8.732995 | 9.024217 | 8.91163   | 8.259219 | 8.27036  | 8.348746 | 6.88556  | 8.479149 | 8.820287 | 8.61075  | 8.494831 | 8.944904 | 8.554457 | -0.0548  | 0.0697    | 0.244    | 0.026643 | 1.292833 | 13       |    |
| 10703_at | YKL125W | RRN3    | 7.380396 | 7.066218 | 7.015353 | 7.021775 | 7.053276 | 6.406123  | 7.016832 | 6.994376 | 6.773446 | 6.996338 | 7.059369 | 6.718648 | 6.730505 | 7.316558 | 6.952234 | 6.863133 | 0.0266   | 0.0838    | 0.108    | 0.012847 | 1.269235 | 13       |    |
| 10704_at | YKL124W | SSH4    | 6.385312 | 5.88887  | 6.224288 | 6.606555 | 6.66297  | 6.342979  | 6.630947 | 6.459492 | 6.48872  | 6.695634 | 6.468129 | 6.670502 | 7.486565 | 7.015081 | 6.83901  | 6.630864 | 0.226    | 0.00546   | 0.000675 | 0.000151 | 1.912778 | 9        |    |
| 10705_g  | YKL124W | SSH4    | 4.453715 | 4.589577 | 4.981981 | 5.211597 | 5.353283 | 5.266455  | 5.047815 | 4.985515 | 5.019616 | 4.773604 | 4.906833 | 5.455738 | 6.319996 | 5.917069 | 5.82349  | 5.175896 | 0.297    | 0.0554    | 0.00112  | 0.000234 | 2.195403 | 7        |    |
| 10706_at | YKL123W |         | 5.27274  | 5.49613  | 6.166087 | 6.807576 | 6.87848  | 6.498988  | 6.607735 | 6.089132 | 6.608483 | 5.89244  | 6.3704   | 7.315721 | 7.683478 | 6.93981  | 7.757734 | 6.69653  | 0.404    | -0.0284   | 0.0067   | 0.001101 | 2.92008  | 7        |    |
| 10707_at | YKL122C | SRP21   | 8.895956 | 9.228071 | 9.205867 | 8.966254 | 9.057292 | 8.807019  | 8.312721 | 8.429417 | 8.202102 | 7.640976 | 7.909957 | 8.016448 | 6.849894 | 7.205085 | 7.037191 | 8.13737  | -0.564   | -0.0133   | 1.09E-07 | 1.80E-07 | 4.455869 | 18       |    |
| 10708_at | YKL121W |         | 6.291074 | 6.263166 | 6.511295 | 7.113817 | 7.150149 | 6.893294  | 7.029938 | 6.877505 | 6.930039 | 6.679793 | 7.272294 | 7.237105 | 6.223144 | 6.59998  | 6.444666 | 7.085692 | 0.144    | -0.189    | 0.000407 | 9.85E-05 | 1.617097 | 12       |    |
| 10709_at | YKL120W | OAC1    | 9.936866 | 9.904862 | 10.15121 | 9.343194 | 9.630561 | 8.816169  | 9.942053 | 9.118122 | 9.683018 | 9.638474 | 9.423386 | 8.896512 | 7.979532 | 8.34266  | 7.659226 | 9.278313 | -0.469   | -0.0865   | 0.000198 | 5.39E-05 | 3.462346 | 16       |    |
| 10710_at | YKL119C | VPH2    | 7.498609 | 7.733647 | 8.157457 | 7.440558 | 7.412937 | 7.388932  | 7.281274 | 7.009824 | 7.004605 | 7.07799  | 7.235992 | 7.012312 | 6.505793 | 6.939323 | 6.367881 | 7.087081 | -0.294   | 0.0306    | 0.000135 | 3.89E-05 | 2.181486 | 16       |    |
| 10711_at | YKL118W |         | 3.732193 | 3.541    | 4.18602  | 3.341555 | 3.447866 | 3.466245  | 3.703704 | 3.581523 | 3.319264 | 3.574591 | 3.611832 | 3.324879 | 3.549347 | 3.480539 | 3.499733 | 3.444905 | -0.0631  | 0.057     | 0.103    | 0.012333 | 1.270303 | 13       |    |
| 10712_at | YKL117W | SBA1    | 8.573829 | 8.555151 | 8.774338 | 8.622117 | 8.609069 | 8.641981  | 8.693787 | 8.609558 | 8.394909 | 8.264029 | 7.953756 | 8.213462 | 7.404655 | 7.948138 | 7.336626 | 8.365164 | -0.295   | -0.0712   | 6.73E-06 | 3.51E-06 | 2.187863 | 16       |    |
| 10713_at | YKL116C | PRR1    | 6.291644 | 6.156881 | 6.010222 | 6.119307 | 6.31357  | 5.854626  | 6.187068 | 6.064983 | 5.972038 | 5.999    | 6.038362 | 5.91273  | 5.816237 | 6.319372 | 5.534599 | 6.025289 | -0.0709  | -0.000812 | 0.253    | 0.027543 | 1.206747 | 13       |    |
| 10714_at | YKL159C | RCN1    | 5.84635  | 5.238362 | 5.945192 | 5.658556 | 5.496584 | 5.418533  | 5.166997 | 5.526296 | 5.521404 | 5.857737 | 5.850792 | 5.894477 | 5.29916  | 5.691118 | 5.67599  | 5.611451 | 0.00836  | -0.00219  | 0.987    | 0.009359 | 1.022413 | 13       |    |
| 10716_at | YKL157W | APE2    | 8.542327 | 8.631453 | 8.730127 | 8.787848 | 8.796484 | 8.807105  | 8.845129 | 8.762023 | 8.954233 | 9.14819  | 8.805618 | 8.895576 | 8.887104 | 8.541628 | 9.009185 | 8.910654 | 0.0516   | -0.0518   | 0.0432   | 0.0057   | 1.231651 | 13       |    |
| 10717_at | YKL156W | RPS27A  | 10.97809 | 11.13663 | 11.4806  | 11.09757 | 11.18668 | 11.15089  | 8.995557 | 10.64173 | 10.38627 | 10.33896 | 10.11566 | 9.906212 | 10.44547 | 9.874607 | 10.26513 | 10.34212 | -0.31    | 0.102     | 0.00283  | 0.000518 | 2.267874 | 16       |    |
| 10718_at | YKL155C | RSM22   | 5.204799 | 4.948414 | 5.58031  | 5.443936 | 5.295102 | 5.1477135 | 5.21244  | 5.360389 | 5.247643 | 5.791455 | 5.277941 | 5.55764  | 5.549334 | 5.144843 | 5.177736 | 5.417951 | 0.0244   | -0.0355   | 0.645    | 0.064002 | 1.13326  | 13       |    |
| 10719_at | YKL154W | SRP102  | 6.150366 | 6.400617 | 6.987037 | 6.158552 | 6.729301 | 5.717134  | 5.468538 | 5.45837  | 5.465484 | 5.690543 | 5.941819 | 5.535769 | 4.753936 | 5.323716 | 4.676679 | 5.656554 | -0.382   | 0.0321    | 0.000787 | 0.000173 | 2.749306 | 16       |    |
| 10720_at | YKL153W |         | 4.795833 | 5.362964 | 5.680974 | 3.892568 | 4.370231 | 4.491205  | 4.174133 | 4.583666 | 4.418351 | 4.41397  | 4.858718 | 4.35056  | 4.675423 | 5.296524 | 4.48853  | 4.297552 | -0.071   | 0.198     | 0.0198   | 0.002839 | 1.811721 | 14       |    |
| 10721_at | YKL152C | GPM1    | 12.31542 | 12.45295 | 12.6217  | 12.38849 | 12.4027  | 12.50621  | 11.63894 | 12.02845 | 11.45183 | 11.8356  | 12.32309 | 12.64232 | 13.3773  | 12.26351 | 12.54819 | 12.20521 | -0.0212  | 0.0623    | 0.419    | 0.043382 | 1.202974 | 13       |    |
| 10722_at | YKL151C |         | 8.292601 | 8.316481 | 8.85571  | 9.985266 | 9.99194  | 9.887027  | 10.08162 | 9.914689 | 10.38827 | 8.81859  | 9.432469 | 9.53085  | 9.326666 | 9.270181 | 9.664446 | 9.910373 | 0.13     | -0.249    | 0.0282   | 0.003894 | 2.250793 | 12       |    |
| 10723_at | YKL150W | MCR1    | 8.39997  | 8.465736 | 7.916323 | 9.881577 | 9.752071 | 9.133015  | 9.60094  | 9.718829 | 10.07075 | 9.072693 | 9.486602 | 9.874661 | 8.312631 | 8.267682 | 8.224707 | 9.783501 | -0.0357  | -0.411    | 1.55E-05 | 6.64E-06 | 1.807224 | 11       |    |
| 10724_at | YKL149C | DBR1    | 5.428119 | 5.52952  | 5.561345 | 5.389733 | 5.554045 | 5.000842  | 5.257223 | 5.249385 | 5.236725 | 5.393082 | 5.545556 | 5.354507 | 5.547441 | 5.814559 | 5.511236 | 5.318524 | 0.0033   | 0.0665    | 0.0285   | 0.003924 | 2.257701 | 13       |    |
| 10725_at | YKL148C | SDH1    | 7.87108  | 8.104945 | 8.330014 | 8.488877 | 8.386703 | 8.960137  | 9.580258 | 9.13703  | 9.567864 | 9.243764 | 9.140373 | 9.935974 | 9.286358 | 9.389412 | 9.516111 | 9.5791   | 0.298    | -0.222    | 0.000133 | 3.86E-05 | 2.765131 | 9        |    |
| 10726_at | YKL147C |         | 5.871912 | 5.741157 | 6.140779 | 5.737519 | 5.841964 | 5.715892  | 5.831793 | 5.494596 | 5.654332 | 5.456185 | 5.777931 | 5.343914 | 5.991104 | 5.809998 | 5.43491  | 5.594027 | -0.0805  | 0.0527    | 0.0394   | 0.005244 | 1.230044 | 13       |    |
| 10727_at | YKL146W | AVT3    | 9.179621 | 9.313252 | 8.794427 | 9.974923 | 9.910504 | 9.361960  | 10.72466 | 10.52019 | 10.3182  | 10.96326 | 10.78983 | 10.62885 | 10.64075 | 10.99011 | 10.58885 | 10.63276 | 0.463    | -0.21     | 4.82E-06 | 2.73E-06 | 3.498404 | 7        |    |
| 10728_at | YKL145W | RPT1    | 9.53323  | 9.458509 | 9.298277 | 9.548712 | 9.587014 | 9.097998  | 9.794307 | 9.648738 | 9.512138 | 9.975813 | 9.466149 | 9.414325 | 9.052946 | 9.504513 | 9.255029 | 9.589943 | -0.0688  | -0.0688   | 0.171    | 0.019374 | 1.225491 | 13       |    |
| 10729_at | YKL144C | RCP25   | 5.910447 | 5.770037 | 6.284093 | 5.565727 | 5.855747 | 5.182455  | 5.043551 | 5.015614 | 4.613267 | 4.543446 | 4.137989 | 4.05226  | 3.600206 | 4.612845 | 3.530176 | 4.616421 | -0.581   | 0.0988    | 2.59E-05 | 1.01E-05 | 4.660455 | 18       |    |
| 10730_at | YKL143W | LTV1    | 7.011087 | 6.651852 | 6.682205 | 6.946973 | 6.192738 | 5.661782  | 6.116739 | 6.335442 | 5.452687 | 6.230783 | 5.657844 | 4.734186 | 6.986788 | 6.114337 | 5.894648 | 5.634365 | -0.132   | 0.25      | 0.015    | 0.002211 | 2.264793 | 14       |    |
| 10731_at | YKL142W | MRP3    | 8.002597 | 8.477241 | 8.250725 | 9.556411 | 9.469858 | 9.283398  | 9.648409 | 9.947333 | 8.847304 | 10.33101 | 10.01155 | 10.30759 | 10.77804 | 10.46149 | 10.56021 | 10.12308 | 0.598    | -0.191    | 3.87E-09 | 2.14E-08 | 4.884059 | 4        |    |
| 10732_at | YKL141W | SDH3    | 8.17485  | 8.347306 | 8.113025 | 9.616634 | 9.547783 | 8.428764  | 10.1687  | 9.908666 | 9.756936 | 8.587914 | 9.179994 | 9.823518 | 8.065551 | 8.603513 | 8.352782 | 9.705188 | -0.0334  | -0.385    | 0.000391 | 9.52E-05 | 2.6287   | 12       |    |
| 10733_at | YKL140W | TGL1    | 7.91907  | 7.136583 | 8.866248 | 7.017127 | 6.86882  | 7.211055  | 7.058809 | 7.093065 | 7.105351 | 6.689905 | 6.566855 | 5.561325 | 5.360651 | 6.392011 | 5.941829 | 6.834596 | -0.318   | -0.0952   | 4.18E-05 | 1.49E-05 | 2.325617 | 15       |    |
| 10734_at | YKL139W | CTK1    | 4.602851 | 4.798887 | 4.399052 | 4.403941 | 4.562981 | 4.579718  | 4.729734 | 4.681458 | 4.712684 | 5.251242 | 5.10528  | 5.055732 | 5.619939 | 5.888034 | 5.649433 | 4.878083 | 0.317    | 0.0734    | 4.3E-07  | 4.60E-07 | 2.315068 | 8        |    |
| 10735_at | YKL138C | MRPL31  | 7.243254 | 7.514927 | 7.986949 | 8.113356 | 8.025279 | 8.213375  | 7.736472 | 7.906612 | 7.903188 | 7.589761 | 7.356851 | 7.996478 | 7.061713 | 7.529565 | 7.373736 | 7.866839 | -0.104   | -0.107    | 0.0266   | 0.003691 | 1.532439 | 12       |    |
| 10736_at | YKL137W | CNC1    | 7.880013 | 7.78746  | 7.821833 | 8.189599 | 8.506314 | 8.394893  | 8.559341 | 8.386384 | 8.24226  | 8.653804 | 8.033626 | 7.971941 | 7.266302 | 7.666692 | 7.345945 | 8.37012  | -0.118   | -0.201    | 6.57E-05 | 2.16E-05 | 1.475699 | 12       |    |
| 10737_at | YKL181W | PRS1    | 10.81989 | 10.79505 | 10.5562  | 10.44304 | 10.59576 | 10.14401  | 9.780346 | 9.738807 | 10.03352 | 9.701199 | 9.849537 | 9.994549 | 10.32523 | 9.207222 | 9.773397 | 9.877629 | -0.255   | 0.104     | 0.00261  | 0.000484 | 1.964573 | 14       |    |
| 10738_l  | ai      | YKL180W | RPL17A   | 12.74754 | 12.72956 | 12.49632 | 12.37853 | 12.4079   | 12.23699 | 11.62622 | 11.89226 | 11.52342 | 11.18707 | 11.58825 | 11.14493 | 9.777931 | 9.608857 | 9.594129 | 11.53006 | -0.778    | -0.0986  | 2.89E-09 | 1.85E-08 | 7.872313 | 18 |
| 10739_f  | ai      | YKL180W | RPL17A   | 10.76135 | 11.15279 | 11.60572 | 10.8084  | 10.82768  | 11.28643 | 8.870302 | 9.688021 | 10.2292  | 8.871957 | 9.772387 | 10.12097 | 8.893879 | 9.018822 | 9.35774  | 9.89269  | -0.078    | 0.0778   | 0.0002   | 5.43E-05 | 4.644668 | 18 |
| 10740_at | YKL179C | COY1    | 8.057422 | 7.847477 | 7.653641 | 7.357213 | 7.609181 | 6.874787  | 7.096591 | 7.291135 | 6.882733 | 6.768663 | 6.958886 | 6.492671 | 6.643667 | 6.871384 | 6.291138 | 6.870995 | -0.33    | 0.0982    | 6.28E-05 | 2.08E-05 | 2.398534 | 13       |    |
| 10741_at | YKL178C | SE3     | 4.07745  | 3.993051 | 4.500434 | 3.813323 | 4.171213 | 4.2712    |          |          |          |          |          |          |          |          |          |          |          |           |          |          |          |          |    |

|            |              |       |          |           |          |          |           |          |          |          |          |          |          |           |          |          |          |          |          |           |          |          |          |    |
|------------|--------------|-------|----------|-----------|----------|----------|-----------|----------|----------|----------|----------|----------|----------|-----------|----------|----------|----------|----------|----------|-----------|----------|----------|----------|----|
| 10773_at   | YKL190W      | CNB1  | 7.901232 | 8.034879  | 8.889435 | 8.439091 | 8.671453  | 8.518773 | 8.442845 | 8.131187 | 8.495934 | 8.676368 | 8.198543 | 8.675438  | 8.140886 | 8.064785 | 8.278141 | 8.491704 | -0.0278  | -0.0734   | 0.26     | 0.028243 | 1.374210 | 13 |
| 10774_at   | YKL189W      | HYM1  | 4.853011 | 4.929518  | 5.342003 | 5.709646 | 5.691282  | 5.609849 | 5.408562 | 5.56761  | 5.732355 | 5.58172  | 5.303428 | 5.619374  | 5.27644  | 5.588194 | 5.463711 | 5.632574 | 0.0756   | -0.103    | 0.0131   | 0.001971 | 1.447194 | 13 |
| 10775_at   | YKL188C      | PA2   | 4.186235 | 4.24488   | 4.633297 | 4.767403 | 4.752098  | 4.516865 | 4.678718 | 4.471347 | 4.958655 | 4.771571 | 4.786506 | 4.867802  | 4.963862 | 5.086177 | 4.575598 | 4.826767 | 0.127    | -0.0572   | 0.00674  | 0.001106 | 1.407938 | 13 |
| 10776_at   | YKL187C      |       | 3.940062 | 3.962733  | 4.593687 | 4.140417 | 4.181923  | 3.698514 | 4.153101 | 4.048463 | 3.94452  | 4.498273 | 4.121999 | 4.4767335 | 4.660193 | 5.042059 | 4.983366 | 4.221082 | 0.215    | 0.0817    | 0.00205  | 0.000394 | 1.788212 | 8  |
| 10777_at   | YKL186C      | MTR2  | 7.07863  | 7.068274  | 8.140625 | 7.328744 | 7.101675  | 7.030014 | 6.508031 | 6.77957  | 6.828565 | 7.222614 | 6.927873 | 7.128293  | 7.797214 | 7.367928 | 7.732331 | 6.926012 | 0.0612   | 0.167     | 0.0191   | 0.002753 | 1.632412 | 16 |
| 10778_at   | YKL185W      | ASH1  | 8.475433 | 8.613537  | 8.537929 | 8.599762 | 8.803998  | 8.568176 | 8.353755 | 8.212773 | 8.462558 | 8.757097 | 9.975571 | 7.974862  | 8.250255 | 8.181568 | 8.362628 | 8.230082 | -0.122   | 0.0547    | 0.0284   | 0.003909 | 1.387964 | 13 |
| 10779_at   | YKL184W      | SPE1  | 5.498077 | 5.191783  | 5.375671 | 5.357693 | 5.165739  | 5.26987  | 4.843957 | 5.256614 | 5.049581 | 4.764661 | 5.203422 | 5.333316  | 4.476563 | 4.849197 | 4.909118 | 5.086607 | -0.151   | -0.00961  | 0.0099   | 0.001541 | 1.493412 | 16 |
| 10780_at   | YKL183W      | LOT5  | 7.438024 | 7.34049   | 8.026145 | 6.929376 | 6.865978  | 7.10551  | 6.083486 | 6.613214 | 6.690111 | 6.230901 | 6.141586 | 6.365384  | 5.361488 | 5.771649 | 5.981813 | 6.336989 | -0.489   | 0.088     | 5.38E-06 | 2.95E-06 | 3.653439 | 18 |
| 10781_at   | YKL182W      | FAS1  | 9.568029 | 9.78325   | 10.00478 | 10.40665 | 10.48474  | 10.52262 | 9.875243 | 10.01737 | 10.48054 | 10.63843 | 10.08777 | 11.08605  | 10.69093 | 10.57842 | 11.16329 | 10.59386 | 0.274    | -0.0774   | 0.00137  | 0.000278 | 2.067127 | 9  |
| 10789_f_at | YKL224C      | PAU16 | 10.12307 | 10.28174  | 11.03098 | 10.51617 | 10.41053  | 10.56173 | 9.225368 | 9.668542 | 10.45297 | 9.469434 | 10.25767 | 11.01799  | 10.29139 | 10.1295  | 10.67863 | 10.11442 | -0.0268  | 0.089     | 0.594    | 0.059408 | 1.294623 | 13 |
| 10790_at   | YKL222C      |       | 5.003014 | 4.881403  | 5.057616 | 5.226437 | 5.253847  | 5.018353 | 4.93341  | 5.22766  | 5.277165 | 5.209159 | 5.549995 | 5.527461  | 5.591748 | 5.18694  | 5.354508 | 5.306892 | 0.116    | -0.0356   | 0.0104   | 0.001603 | 1.358285 | 13 |
| 10791_at   | YKL221W      | MCH2  | 4.479706 | 4.373928  | 4.917226 | 4.413555 | 4.505457  | 4.478894 | 5.288357 | 4.711298 | 4.62286  | 5.364459 | 5.027143 | 5.022712  | 4.6654   | 4.465453 | 4.60914  | 4.905993 | 0.0473   | -0.0958   | 0.16     | 0.018281 | 1.360419 | 13 |
| 10792_at   | YKL220C      | FRE2  | 5.477596 | 5.236884  | 5.56869  | 4.981416 | 5.11973   | 4.849735 | 5.08807  | 5.118862 | 4.959023 | 5.138941 | 5.273363 | 5.20253   | 4.648295 | 4.625601 | 4.70412  | 5.039757 | -0.157   | -0.00461  | 0.0055   | 0.000925 | 1.517975 | 16 |
| 10793_at   | YKL219W      | COS9  | 8.209244 | 8.00469   | 8.105152 | 7.81829  | 8.014448  | 7.620595 | 7.468292 | 7.332937 | 7.762042 | 7.223727 | 7.386888 | 7.281284  | 6.161071 | 6.149443 | 6.025693 | 7.397757 | -0.506   | -0.0793   | 9.59E-09 | 3.73E-08 | 3.822966 | 18 |
| 10794_at   | YKL218C      | SRY1  | 7.648612 | 6.927823  | 7.166451 | 7.261263 | 7.223457  | 6.854883 | 7.317879 | 7.235257 | 7.587985 | 7.627607 | 7.332902 | 7.176111  | 7.024063 | 6.450875 | 6.904641 | 7.307948 | -0.0901  | -0.0837   | 0.0708   | 0.008864 | 1.416385 | 12 |
| 10795_at   | YKL217W      | JEN1  | 6.264063 | 5.569626  | 5.922067 | 6.461627 | 6.777296  | 6.454388 | 6.685585 | 6.679878 | 6.953697 | 7.380698 | 7.332357 | 7.209386  | 7.122166 | 7.029604 | 6.708218 | 7.07515  | 0.295    | -0.178    | 1.56E-05 | 6.66E-06 | 2.471835 | 9  |
| 10796_at   | YKL216W      | URA1  | 9.7153   | 9.63738   | 9.360745 | 8.927305 | 9.129315  | 8.515449 | 8.473214 | 8.706925 | 8.728558 | 8.007059 | 8.500291 | 7.845442  | 7.492918 | 7.758669 | 6.475992 | 8.324345 | -0.521   | 0.0673    | 2.39E-07 | 3.00E-07 | 3.978059 | 18 |
| 10797_at   | YKL215C      |       | 6.695822 | 6.477283  | 6.520021 | 6.634596 | 6.592287  | 6.272966 | 6.902605 | 6.61388  | 6.815018 | 6.343258 | 6.606336 | 6.487729  | 6.031291 | 6.088455 | 6.187222 | 6.578814 | -0.119   | -0.0694   | 0.00192  | 0.000373 | 1.446455 | 16 |
| 10798_at   | YKL214C      | YRA2  | 6.519231 | 6.808773  | 7.602311 | 6.570174 | 6.570292  | 6.639232 | 6.038235 | 6.165609 | 6.418365 | 6.70734  | 6.447971 | 6.595756  | 5.943143 | 5.96988  | 5.968737 | 6.226269 | -0.252   | 0.0683    | 0.00764  | 0.001231 | 1.948    | 16 |
| 10799_at   | YKL213C      | DOA1  | 7.130853 | 7.146707  | 7.369681 | 7.662135 | 7.547098  | 7.154781 | 7.465598 | 7.361213 | 7.352249 | 6.759055 | 7.343889 | 7.477558  | 7.141863 | 7.533737 | 7.279267 | 7.346166 | -0.00107 | -0.0181   | 0.899    | 0.082626 | 1.045858 | 13 |
| 10800_at   | YKL212W      | SAC1  | 9.141909 | 9.702874  | 8.413367 | 9.18685  | 9.321366  | 8.528466 | 9.81897  | 8.971726 | 8.172465 | 8.719892 | 8.811175 | 8.001862  | 7.811461 | 8.302706 | 7.832076 | 8.761462 | -0.302   | -0.061    | 0.026    | 0.00361  | 2.28553  | 16 |
| 10801_at   | YKL211C      | TRP3  | 8.1233   | 8.333343  | 8.504931 | 7.819874 | 7.887097  | 7.882733 | 7.929998 | 7.69095  | 8.006752 | 7.80173  | 7.801147 | 7.989618  | 7.259222 | 7.37189  | 7.440264 | 7.792919 | -0.221   | 0.00858   | 9.58E-05 | 2.95E-05 | 1.79886  | 16 |
| 10802_at   | YKL210W      | UBA1  | 8.378477 | 8.698978  | 8.663634 | 8.379048 | 8.291442  | 8.319578 | 8.318891 | 7.908651 | 8.094493 | 7.520874 | 7.851831 | 8.024997  | 7.808681 | 8.13451  | 7.870817 | 7.964391 | -0.189   | 0.0838    | 0.000536 | 0.00125  | 1.660739 | 16 |
| 10803_at   | YKL209C      | ST6   | 3.992395 | 3.773506  | 4.416752 | 3.993065 | 3.845837  | 3.658115 | 4.138393 | 3.892581 | 3.77127  | 3.765298 | 3.998511 | 3.927999  | 3.688403 | 3.803824 | 3.40551  | 3.863258 | -0.0955  | -0.00745  | 0.103    | 0.012367 | 1.88212  | 13 |
| 10804_at   | YKL208W      | CBT1  | 6.251683 | 6.195378  | 6.368813 | 6.052478 | 6.399546  | 6.048849 | 6.211031 | 6.179556 | 5.974218 | 6.236397 | 5.728222 | 5.434749  | 5.543956 | 5.85597  | 5.49559  | 5.959968 | -0.182   | -0.000733 | 0.00462  | 0.000798 | 1.619143 | 16 |
| 10805_at   | YKL207W      |       | 8.655287 | 8.430968  | 8.800272 | 8.284459 | 9.223618  | 8.546187 | 9.161868 | 8.245016 | 8.169686 | 9.281871 | 8.005231 | 6.387104  | 7.563792 | 8.432102 | 8.25128  | 8.494158 | -0.198   | -0.065    | 0.118    | 0.013983 | 1.692447 | 16 |
| 10851_at   | YJR149W      |       | 5.139038 | 5.089964  | 5.370543 | 6.281178 | 6.146486  | 6.095196 | 6.518533 | 6.450206 | 6.688365 | 6.260856 | 6.050065 | 6.491588  | 6.226651 | 6.021494 | 5.6879   | 6.495798 | 0.166    | -0.245    | 9.67E-05 | 2.97E-05 | 2.363241 | 9  |
| 10852_at   | YJR150C      | DAN1  | 12.41556 | 12.49892  | 12.52151 | 12.10516 | 12.10759  | 12.17864 | 11.42505 | 11.9727  | 11.56017 | 11.22993 | 11.41707 | 11.22572  | 12.15529 | 12.10936 | 11.59543 | -0.113   | 0.206    | 0.000115  | 3.43E-05 | 1.963427 | 14       |    |
| 10853_at   | YJR151C      | DAN5  | 8.27805  | 7.953863  | 8.097738 | 8.652111 | 8.752889  | 8.215469 | 8.029918 | 8.216013 | 8.038202 | 8.596464 | 8.805549 | 8.758226  | 8.942731 | 9.104372 | 8.486974 | 0.183    | 0.0179   | 0.0291    | 0.004005 | 1.623607 | 13       |    |
| 10854_at   | YJR152W      | DA4   | 7.027289 | 6.6775401 | 7.044049 | 7.610966 | 7.866274  | 7.415529 | 8.104631 | 7.231947 | 7.988133 | 7.850755 | 7.856276 | 8.198658  | 7.680412 | 7.917856 | 7.736653 | 7.911062 | 0.219    | -0.151    | 0.000289 | 7.37E-05 | 1.024652 | 9  |
| 10855_at   | YJR153W      | PGU1  | 3.864757 | 3.79126   | 4.181557 | 3.481862 | 3.647703  | 3.776581 | 3.612011 | 3.764265 | 3.713332 | 3.65801  | 3.821672 | 3.347107  | 3.995188 | 4.057985 | 3.858443 | 3.680604 | 0.00646  | 0.0948    | 0.00985  | 0.001533 | 1.266196 | 13 |
| 10856_at   | YJR154W      |       | 6.765169 | 5.357923  | 4.732239 | 5.494487 | 4.926863  | 5.310644 | 6.204436 | 7.085976 | 7.683482 | 8.086063 | 5.536728 | 4.445001  | 5.002935 | 4.100999 | 4.128007 | 5.733811 | -0.354   | -0.206    | 0.0892   | 0.010888 | 2.952861 | 15 |
| 10857_at   | YJR155W      | AAD10 | 9.250716 | 9.041938  | 9.32382  | 10.24593 | 10.444107 | 10.428   | 9.582669 | 9.893866 | 10.28712 | 9.680647 | 9.595377 | 9.692046  | 9.492875 | 9.709212 | 9.624366 | 10.0335  | 0.0268   | -0.159    | 0.0643   | 0.000128 | 1.532329 | 12 |
| 10858_s_a  | YJR156C      | TH11  | 6.958345 | 6.536982  | 7.374672 | 9.101611 | 9.109571  | 9.077827 | 9.45508  | 10.03767 | 9.881456 | 9.486491 | 9.9091   | 9.559091  | 9.627916 | 9.534118 | 9.744128 | 9.898358 | 0.128    | -0.727    | 1.25E-08 | 4.50E-08 | 7.130094 | 11 |
| 10859_at   | YJR157W      |       | 3.735742 | 3.412219  | 4.276524 | 3.611857 | 3.748988  | 3.884262 | 3.553048 | 3.458474 | 3.446919 | 3.350825 | 3.943132 | 3.62484   | 3.625892 | 3.712934 | 3.550385 | 3.589307 | -0.0429  | 0.0368    | 0.495    | 0.050425 | 1.171202 | 13 |
| 10860_s_a  | YJR158W      | HXT16 | 5.378112 | 4.899108  | 5.357299 | 5.120821 | 5.235078  | 5.118743 | 5.468026 | 5.726171 | 5.583926 | 5.709932 | 5.592097 | 5.096756  | 6.380236 | 5.142939 | 5.762907 | 5.458856 | 0.143    | 0.00366   | 0.148    | 0.017069 | 1.459313 | 13 |
| 10861_s_a  | YJR159W      | SOR1  | 6.062331 | 5.715651  | 6.540702 | 6.033006 | 6.162507  | 6.174101 | 6.22163  | 6.325233 | 6.320654 | 7.024498 | 6.755341 | 6.980059  | 6.489454 | 6.282361 | 6.577652 | 6.553479 | 0.147    | -0.0821   | 0.0418   | 0.005531 | 1.546089 | 13 |
| 10862_s_a  | YJR160C      | MPH3  | 4.551226 | 4.298949  | 4.849847 | 4.308947 | 4.299777  | 4.24983  | 4.47351  | 4.437395 | 4.309406 | 5.317421 | 5.023965 | 4.796713  | 6.330628 | 4.954198 | 5.589482 | 4.857603 | 0.32     | 0.115     | 0.00118  | 0.000245 | 2.341487 | 13 |
| 10863_f_at | YJL136w-a    |       | 6.769715 | 6.539069  | 6.707767 | 6.587025 | 6.5918    | 6.343632 | 6.254771 | 6.19035  | 6.477794 | 6.602429 | 6.907174 | 5.866268  | 6.693499 | 6.369426 | 6.220577 | 6.369657 | -0.065   | 0.0497    | 0.359    | 0.03769  | 1.23497  | 13 |
| 10864_f_at | YJL136w-a    |       | 6.445884 | 6.219663  | 6.702474 | 6.372883 | 6.40212   | 6.466082 | 6.170962 | 5.73735  | 6.16724  | 6.326545 | 6.376049 | 5.474426  | 6.201214 | 6.097504 | 5.960624 | 6.094777 | -0.111   | 0.0493    | 0.144    | 0.016637 | 1.347034 | 16 |
| 10866_at   | YJR135w-TIM8 |       | 7.72702  | 8.079253  | 8.783827 | 8.369322 | 8.406428  | 8.632088 | 7.598045 | 7.621992 | 7.666854 | 6.5927   |          |           |          |          |          |          |          |           |          |          |          |    |

|          |          |       |           |          |          |          |          |          |          |          |          |          |          |          |          |          |          |          |           |          |          |          |          |    |
|----------|----------|-------|-----------|----------|----------|----------|----------|----------|----------|----------|----------|----------|----------|----------|----------|----------|----------|----------|-----------|----------|----------|----------|----------|----|
| 10905_at | YJR112W  | NNF1  | 7.208225  | 7.660502 | 8.53117  | 7.537921 | 7.566383 | 7.619222 | 6.376941 | 7.169476 | 6.853902 | 6.391944 | 6.420403 | 6.302286 | 6.201    | 6.614743 | 6.506307 | 6.688487 | -0.403    | 0.128    | 0.00106  | 0.000224 | 2.290462 | 14 |
| 10906_at | YJR113C  | RSM7  | 8.850718  | 9.01674  | 9.211742 | 9.901727 | 9.965294 | 10.14836 | 9.692499 | 10.12496 | 10.34421 | 10.29669 | 10.00329 | 9.948279 | 9.669027 | 10.10995 | 9.896301 | 10.1968  | 0.194     | -0.198   | 0.000143 | 4.10E-05 | 2.06953  | 9  |
| 10907_at | YJR114W  |       | 6.151092  | 6.02816  | 5.818881 | 5.794998 | 6.009096 | 6.146649 | 6.014287 | 6.002493 | 6.129551 | 5.958868 | 5.868617 | 5.589647 | 6.034128 | 5.849448 | 5.847978 | 5.925107 | -0.0389   | 0.00926  | 0.47     | 0.048159 | 1.108691 | 13 |
| 10908_at | YJR115W  |       | 7.782695  | 7.332811 | 7.434001 | 8.494487 | 8.011469 | 8.589287 | 8.824113 | 9.579752 | 9.068639 | 8.852378 | 9.020479 | 9.062776 | 9.404225 | 9.268808 | 9.36171  | 9.061206 | 0.449     | -0.171   | 7.56E-05 | 2.44E-05 | 3.291693 | 7  |
| 10909_at | YJR116W  |       | 10.8431   | 10.48805 | 10.46351 | 11.30144 | 11.07929 | 10.994   | 11.27581 | 11.31917 | 11.1358  | 11.6669  | 11.62254 | 11.87164 | 11.90974 | 11.9738  | 11.89357 | 11.53063 | 0.357     | -0.0743  | 5.79E-08 | 1.18E-07 | 2.576081 | 7  |
| 10910_at | YJR117W  | STE24 | 8.071529  | 8.225448 | 8.716843 | 7.832971 | 7.670283 | 8.120502 | 7.556643 | 7.212343 | 7.52315  | 7.156237 | 7.217933 | 7.705812 | 8.011262 | 8.081312 | 8.064863 | 7.409472 | -0.133    | 0.195    | 0.00201  | 0.00388  | 1.897609 | 14 |
| 10911_at | YJR118C  | ILM1  | 7.177015  | 7.440871 | 7.544185 | 6.871705 | 6.551851 | 6.978715 | 6.302961 | 6.010856 | 6.430847 | 5.864297 | 5.862295 | 6.339714 | 9.079144 | 7.938932 | 8.146285 | 6.18905  | 0.194     | 0.475    | 2.39E-05 | 9.44E-06 | 4.157252 | 8  |
| 10912_at | YJR119C  | JHD2  | 3.903017  | 3.615116 | 4.482628 | 4.255805 | 4.316677 | 4.031689 | 4.24178  | 4.102627 | 4.167791 | 4.511128 | 4.493091 | 4.803797 | 6.594954 | 5.309364 | 6.287862 | 4.433335 | 0.523     | 0.166    | 1.02E-05 | 4.82E-06 | 4.003418 | 7  |
| 10913_at | YJR120W  |       | 4.986886  | 4.858742 | 5.39046  | 5.046501 | 4.947184 | 5.464712 | 4.73185  | 4.633059 | 4.955879 | 4.878286 | 5.096385 | 4.806637 | 5.157931 | 4.945867 | 5.144916 | 4.917215 | -0.00862  | 0.0484   | 0.454    | 0.04668  | 1.139985 | 13 |
| 10914_at | YJR121W  | ATP2  | 8.697938  | 8.243625 | 8.018825 | 9.722317 | 9.707486 | 9.612316 | 9.824544 | 9.600116 | 10.17728 | 9.125328 | 9.92985  | 9.776552 | 7.981977 | 7.928208 | 8.640541 | 9.737355 | -0.0961   | -0.4     | 0.000111 | 3.33E-05 | 2.955767 | 11 |
| 10915_at | YJR122W  | CAF17 | 5.685037  | 5.541545 | 6.658863 | 6.325864 | 6.470417 | 6.51524  | 5.973337 | 6.071871 | 6.789754 | 6.003699 | 5.796196 | 6.195847 | 6.120054 | 5.907576 | 6.093216 | 6.241262 | -0.0235   | -0.0595  | 0.575    | 0.057665 | 1.193949 | 13 |
| 10916_at | YJR123W  | RPS5  | 11.24828  | 11.21873 | 11.75546 | 11.21397 | 11.27609 | 11.494   | 10.24698 | 10.54117 | 10.66032 | 9.684218 | 9.642343 | 10.18692 | 9.891963 | 9.062759 | 9.345218 | 10.28642 | -0.647    | 0.00548  | 3.07E-06 | 1.95E-06 | 5.550631 | 18 |
| 10917_at | YJR124C  |       | 7.142066  | 6.923682 | 7.087478 | 6.734636 | 6.875689 | 6.649683 | 6.500197 | 6.248519 | 6.270991 | 6.284293 | 6.097886 | 5.975476 | 6.512843 | 6.053607 | 5.991027 | 6.258887 | -0.245    | 0.102    | 0.000074 | 2.39E-05 | 1.912609 | 14 |
| 10918_at | YJR125C  | ENT3  | 6.781077  | 7.05377  | 7.755794 | 7.432959 | 7.451859 | 7.15501  | 6.787646 | 6.760589 | 6.823908 | 6.834622 | 6.590489 | 6.616702 | 7.11575  | 6.543061 | 6.899139 | 6.849588 | -0.127    | 0.0556   | 0.144    | 0.016647 | 1.402223 | 16 |
| 10919_at | YJR126C  | VPS70 | 7.410097  | 7.84455  | 8.410064 | 8.10019  | 7.928286 | 7.891369 | 7.347366 | 7.824799 | 8.087402 | 7.682865 | 7.688858 | 8.129803 | 7.937593 | 7.249533 | 8.125547 | 7.835676 | -0.0348   | 0.000346 | 0.881    | 0.084712 | 1.096722 | 13 |
| 10920_at | YJR079W  |       | 3.97319   | 3.692376 | 3.841605 | 3.468576 | 3.682498 | 3.48927  | 3.692704 | 3.744934 | 3.739485 | 3.803388 | 3.733848 | 3.389689 | 3.81577  | 3.698194 | 3.563746 | 3.61867  | -0.0264   | 0.037    | 0.283    | 0.03053  | 1.141122 | 13 |
| 10921_at | YJR082C  | EAF6  | 4.650899  | 4.419744 | 5.33847  | 5.394227 | 5.146293 | 5.386703 | 5.267683 | 5.293058 | 5.23273  | 5.213287 | 5.374527 | 5.610024 | 4.730952 | 5.106338 | 4.590981 | 5.397922 | 0.0315    | -0.144   | 0.00973  | 0.001516 | 1.491275 | 12 |
| 10922_at | YJR083C  | ACF4  | 5.754343  | 5.741046 | 6.172746 | 5.766841 | 5.861235 | 5.778365 | 5.476577 | 5.497931 | 5.658408 | 5.160594 | 5.222043 | 4.899115 | 4.85035  | 5.53536  | 4.982906 | 5.3599   | -0.236    | 0.0451   | 0.00135  | 0.000275 | 1.271699 | 16 |
| 10923_at | YJR084W  | CSN12 | 6.465438  | 6.280137 | 6.345284 | 6.23523  | 6.506262 | 6.234158 | 6.043071 | 6.325592 | 6.278304 | 5.91888  | 5.877402 | 5.570227 | 5.056207 | 5.502781 | 5.382859 | 6.013037 | -0.298    | -0.0474  | 4.62E-06 | 2.63E-06 | 2.804089 | 16 |
| 10924_at | YJR085C  |       | 10.70914  | 10.79339 | 11.17763 | 11.74365 | 11.61902 | 11.67252 | 11.74553 | 11.54084 | 11.78388 | 11.29735 | 11.39035 | 11.67143 | 11.40183 | 11.62684 | 11.32266 | 11.69041 | 0.099     | -0.136   | 0.0073   | 0.001186 | 1.62956  | 12 |
| 10925_at | YJR086W  | STE18 | 3.893772  | 3.916833 | 4.393547 | 4.02639  | 3.95605  | 4.124739 | 3.663835 | 3.825529 | 3.842756 | 3.589356 | 3.896138 | 3.807478 | 4.252235 | 4.443209 | 4.360027 | 3.818193 | 0.0522    | 0.111    | 0.00462  | 0.000798 | 1.411494 | 13 |
| 10926_at | YJR087W  |       | 4.952873  | 4.929988 | 5.26758  | 4.286746 | 4.617789 | 4.452933 | 4.272168 | 4.288576 | 4.381108 | 4.310509 | 4.488798 | 4.137301 | 4.797132 | 4.79763  | 4.522174 | 4.256129 | -0.0805   | 0.169    | 4.18E-05 | 1.49E-05 | 1.713982 | 14 |
| 10927_at | YJR088C  |       | 6.658295  | 6.753384 | 6.936167 | 6.724726 | 6.597018 | 6.896393 | 6.033657 | 6.082239 | 6.172191 | 6.14429  | 5.902753 | 5.927843 | 5.715264 | 5.696728 | 5.75665  | 6.114904 | -0.293    | 0.0429   | 2.02E-05 | 8.24E-06 | 2.173241 | 16 |
| 10928_at | YJR089W  | BIR1  | 4.604892  | 4.155724 | 4.894299 | 4.604096 | 4.761103 | 4.516169 | 4.904066 | 5.112719 | 4.663431 | 5.137012 | 5.030682 | 4.817883 | 5.039928 | 5.152283 | 4.851902 | 4.872286 | 0.137     | -0.269   | 0.0319   | 0.004337 | 1.436523 | 13 |
| 10929_at | YJR090C  | GRR1  | 6.333272  | 6.326717 | 6.947672 | 6.717696 | 6.528025 | 6.665831 | 6.407571 | 6.4631   | 6.432083 | 6.687576 | 6.41357  | 6.934203 | 7.152095 | 6.916725 | 7.211079 | 6.602052 | 0.141     | 0.0603   | 0.0069   | 0.001129 | 1.482098 | 7  |
| 10930_at | YJR091C  |       | 6.963786  | 6.347584 | 6.267286 | 7.127568 | 7.04183  | 6.489174 | 7.138587 | 7.130615 | 7.280837 | 7.732032 | 7.535493 | 7.178419 | 8.178258 | 7.512171 | 8.16747  | 7.341463 | 0.42      | -0.00444 | 0.00024  | 6.31E-05 | 3.401063 | 7  |
| 10931_at | YJR093C  | FIP1  | 6.222435  | 6.069813 | 6.657214 | 6.419258 | 6.258011 | 6.262156 | 6.159855 | 6.328594 | 6.211052 | 6.524343 | 6.580926 | 6.479373 | 6.274765 | 6.292492 | 6.148193 | 6.375827 | 0.00146   | -0.0276  | 0.637    | 0.063291 | 1.071525 | 13 |
| 10932_at | YJR094C  | IME1  | 5.331572  | 5.284614 | 5.802442 | 5.457826 | 5.203934 | 5.409636 | 5.172645 | 5.314731 | 5.249895 | 5.480433 | 5.561777 | 5.539437 | 5.799758 | 5.273025 | 5.290027 | 5.376237 | 0.0324    | 0.0224   | 0.729    | 0.071534 | 1.082751 | 13 |
| 10933_at | YJR094W  | RL43B | 12.313176 | 12.38712 | 12.79916 | 12.33942 | 12.3709  | 12.37204 | 10.85668 | 11.29211 | 11.36167 | 10.36128 | 10.49059 | 10.29284 | 9.473081 | 9.46353  | 9.847878 | 10.94957 | -0.828    | 0.041    | 1.63E-06 | 1.22E-06 | 8.971054 | 18 |
| 10934_at | YJR095W  | SFC1  | 4.811674  | 4.088255 | 5.026223 | 4.516958 | 4.251822 | 4.327047 | 4.641029 | 4.537217 | 4.110892 | 4.637619 | 4.228394 | 4.407123 | 3.798772 | 3.72352  | 3.952985 | 4.364037 | -0.186    | -0.0396  | 0.0138   | 0.002065 | 1.635237 | 16 |
| 10935_at | YJR096W  |       | 7.313545  | 6.913877 | 7.647824 | 8.881203 | 8.933451 | 8.995956 | 9.795234 | 9.266855 | 9.902807 | 9.662304 | 9.549998 | 9.992019 | 9.490884 | 9.482979 | 9.754599 | 9.815654 | 0.565     | -0.377   | 4.3E-07  | 4.60E-07 | 6.176491 | 10 |
| 10936_at | YJR097W  | JJ3   | 5.220188  | 5.009644 | 5.592901 | 4.628179 | 4.602823 | 4.676574 | 4.587503 | 4.564307 | 4.562775 | 4.43269  | 4.911831 | 4.31187  | 5.32804  | 4.825693 | 4.778534 | 4.533247 | -0.0749   | 0.164    | 0.00377  | 0.000667 | 1.677147 | 14 |
| 10937_at | YJR098C  |       | 5.846738  | 5.631052 | 5.507807 | 5.467495 | 5.420272 | 4.93427  | 5.246012 | 5.275728 | 5.160626 | 4.651887 | 5.181973 | 4.981468 | 4.818472 | 4.918531 | 4.710784 | 5.042234 | -0.223    | 0.0537   | 0.000198 | 5.38E-05 | 1.807957 | 16 |
| 10938_at | YJR099W  | YUH1  | 4.424489  | 4.435592 | 5.229661 | 4.678032 | 4.530721 | 4.00735  | 4.2003   | 4.204298 | 3.971753 | 3.547777 | 4.045523 | 3.837659 | 3.093812 | 3.656805 | 3.019277 | 3.599145 | -0.396    | 0.0152   | 7.97E-05 | 2.53E-05 | 2.8596   | 16 |
| 10939_at | YJR100C  |       | 6.971392  | 6.834853 | 7.214047 | 7.35679  | 7.263132 | 6.931309 | 7.454434 | 7.310101 | 7.171894 | 6.667635 | 6.85048  | 6.861653 | 6.318686 | 6.532077 | 6.298281 | 7.067512 | -0.19     | -0.1     | 0.000247 | 6.48E-05 | 1.764969 | 15 |
| 10940_at | YJR101W  | RSM26 | 7.278489  | 7.076144 | 6.880167 | 7.826818 | 7.057995 | 7.57052  | 7.910136 | 7.426761 | 7.515161 | 7.58222  | 7.286005 | 7.635187 | 7.232361 | 7.392091 | 7.024569 | 7.690426 | -0.000082 | -0.143   | 0.017    | 0.002475 | 1.411968 | 12 |
| 10941_at | YJR102C  | VPS25 | 6.531659  | 6.553764 | 6.977287 | 6.903227 | 6.890423 | 7.619637 | 6.800065 | 6.483376 | 6.546931 | 6.261314 | 6.150038 | 6.447375 | 7.233808 | 6.004583 | 6.689047 | 6.506245 | -0.254    | -0.0671  | 3.88E-05 | 1.40E-05 | 1.960851 | 16 |
| 10942_at | YJR103W  | UR48  | 8.143074  | 8.122064 | 8.507817 | 8.877058 | 8.945658 | 8.850392 | 9.054274 | 9.325729 | 9.167739 | 9.621979 | 9.555402 | 9.96403  | 8.46981  | 9.044589 | 8.961988 | 9.4665   | 0.188     | -0.258   | 0.000041 | 1.46E-05 | 2.52412  | 9  |
| 10943_at | YJR105W  | PTK2  | 7.372306  | 7.324091 | 7.682618 | 8.464089 | 8.057183 | 8.373087 | 8.2145   | 8.417328 | 8.918704 | 9.138456 | 8.828414 | 8.840904 | 9.553991 | 9.111853 | 9.299902 | 8.813627 | 0.46      | -0.114   | 1.67E-06 | 1.24E-06 | 3.389541 | 7  |
| 10944_at | YJR106W  | CBF1  | 5.957473  | 5.540246 | 5.913957 | 5.416727 | 5.372135 | 5.541102 | 5.767993 | 5.71414  | 5.427435 | 5.851792 | 5.575727 | 5.22014  | 5.986239 | 5.736192 | 5.587255 | 5.524469 | 0.00071   | 0.0689   | 0.181    | 0.020407 | 1.182203 | 13 |
| 10945_at | YJR1061W |       | 7.121769  | 6.773186 | 7.244828 | 6.890418 | 7.186418 | 7.113017 | 7.148233 | 7.145755 | 6.98746  |          |          |          |          |          |          |          |           |          |          |          |          |    |

|          |         |        |           |           |          |          |           |           |          |          |           |          |          |          |          |          |          |          |         |           |          |           |          |    |
|----------|---------|--------|-----------|-----------|----------|----------|-----------|-----------|----------|----------|-----------|----------|----------|----------|----------|----------|----------|----------|---------|-----------|----------|-----------|----------|----|
| 10977_at | YJR048W | CYC1   | 7.669382  | 7.295328  | 6.53968  | 9.466718 | 9.198341  | 8.542386  | 9.51674  | 9.914025 | 9.587134  | 10.5164  | 9.921647 | 10.54439 | 9.574559 | 10.0389  | 8.834607 | 10.14256 | 0.613   | -0.499    | 2.41E-06 | 1.63E-06  | 8.968347 | 10 |
| 10978_at | YJR049C | UTR1   | 7.118909  | 7.578344  | 7.557519 | 7.532043 | 7.242241  | 7.857531  | 7.866975 | 7.963296 | 7.815327  | 7.740073 | 7.942239 | 8.342275 | 7.235351 | 7.81032  | 7.69439  | 7.878739 | 0.0726  | -0.11     | 0.0561   | 0.00719   | 1.464925 | 13 |
| 10979_at | YJR050W | ISY1   | 7.047717  | 6.881366  | 6.764266 | 7.049794 | 7.155532  | 6.852701  | 7.283185 | 7.410331 | 7.058895  | 7.253447 | 7.169231 | 6.713331 | 6.397693 | 6.744274 | 6.361348 | 7.126231 | -0.101  | -0.119    | 0.00204  | 0.000392  | 1.563485 | 12 |
| 10980_at | YJR051W | OSM1   | 7.167691  | 7.734409  | 8.150376 | 7.8069   | 7.959281  | 7.866919  | 7.821225 | 7.460332 | 7.798849  | 7.689342 | 7.230207 | 6.527337 | 6.474666 | 6.956176 | 6.950411 | 7.606874 | -0.292  | -0.0698   | 1.84E-05 | 7.61E-06  | 2.168292 | 16 |
| 10981_at | YJR052W | RAD7   | 6.58412   | 6.294647  | 6.282552 | 6.80329  | 6.74458   | 6.480538  | 7.157314 | 6.521241 | 6.857094  | 7.92714  | 7.464632 | 7.030952 | 9.101637 | 8.74802  | 8.359484 | 7.179367 | 0.619   | 0.104     | 4.37E-07 | 4.65E-07  | 5.159294 | 6  |
| 10982_at | YJR053W | BFA1   | 4.670533  | 4.4309853 | 4.558731 | 4.170029 | 4.148996  | 4.031689  | 4.04709  | 4.092727 | 4.223266  | 4.072674 | 4.292973 | 4.232988 | 4.23529  | 4.218885 | 4.226959 | 4.053734 | -0.0634 | 0.0848    | 0.00214  | 0.000409  | 1.35954  | 13 |
| 10983_at | YJR054W |        | 6.282253  | 5.975291  | 6.348201 | 5.409573 | 5.638374  | 5.414405  | 5.071293 | 4.999133 | 5.238547  | 5.000742 | 5.117084 | 4.990132 | 5.033434 | 5.428303 | 4.976403 | 5.030214 | -0.268  | 0.177     | 3.3E-06  | 2.06E-06  | 2.358843 | 14 |
| 10984_at | YJR055W | HIT1   | 5.546089  | 5.034937  | 5.11482  | 5.373555 | 5.661233  | 4.957154  | 5.533559 | 5.648136 | 5.593171  | 6.678173 | 6.193102 | 5.899701 | 6.147597 | 5.830125 | 5.874692 | 5.868586 | 0.244   | -0.083    | 0.00823  | 0.001314  | 1.908847 | 9  |
| 10985_at | YJR056C |        | 7.090492  | 6.715744  | 7.437514 | 7.356375 | 7.627714  | 7.241945  | 6.723987 | 7.214745 | 7.115837  | 7.063773 | 6.839199 | 6.760899 | 6.011762 | 6.075193 | 5.794228 | 7.046499 | -0.306  | -0.14     | 0.000042 | 1.50E-05  | 2.391235 | 15 |
| 10986_at | YJR057W | CDC8   | 6.441107  | 6.637275  | 7.428476 | 6.959944 | 6.998869  | 6.892605  | 6.358835 | 6.399457 | 6.146062  | 6.699903 | 6.649746 | 6.695798 | 7.05227  | 6.591235 | 7.010592 | 6.599227 | 0.00598 | 0.0767    | 0.384    | 0.040103  | 1.211347 | 13 |
| 10987_at | YJR058C | APS2   | 7.893046  | 7.697887  | 8.713606 | 8.39971  | 8.37495   | 8.712112  | 7.932621 | 8.032818 | 8.302055  | 7.960238 | 8.11712  | 8.23091  | 7.592832 | 7.084107 | 8.08886  | 8.204662 | -0.151  | -0.0935   | 0.0501   | 0.006495  | 1.612455 | 15 |
| 10988_at | YJR011C |        | 4.555979  | 4.553814  | 4.593502 | 4.631156 | 4.891367  | 4.614463  | 4.542852 | 4.553203 | 4.335047  | 5.125036 | 4.704586 | 4.641945 | 4.46819  | 4.777002 | 4.742424 | 4.692785 | 0.0376  | -0.0207   | 0.542    | 0.054692  | 1.116962 | 13 |
| 10989_at | YJR012C |        | 5.279325  | 5.355914  | 5.693912 | 5.58368  | 5.478099  | 5.944331  | 5.487403 | 5.626826 | 5.39095   | 5.617915 | 5.564542 | 5.759153 | 5.410237 | 5.25346  | 5.103951 | 5.620172 | -0.0446 | -0.0731   | 0.0392   | 0.005223  | 1.277665 | 13 |
| 10990_at | YJR013W | GP14   | 7.580436  | 7.595936  | 7.281822 | 7.578259 | 7.468926  | 7.47925   | 7.803374 | 7.629765 | 7.47441   | 7.281369 | 7.383084 | 7.22188  | 6.553759 | 7.280846 | 6.505781 | 7.452464 | -0.191  | -0.0877   | 0.000718 | 0.00016   | 1.726894 | 15 |
| 10991_at | YJR014W | TMA22  | 7.307213  | 7.762609  | 8.379303 | 7.510526 | 7.239968  | 7.838367  | 6.966612 | 7.199295 | 7.02788   | 6.799247 | 6.847836 | 7.102708 | 6.043205 | 6.605999 | 6.280406 | 7.013986 | -0.393  | 0.0159    | 0.00016  | 4.50E-05  | 2.836663 | 16 |
| 10992_at | YJR015W |        | 8.091599  | 7.860812  | 7.703026 | 8.143769 | 8.240542  | 8.052456  | 8.356231 | 8.197193 | 8.559845  | 8.679417 | 8.546471 | 8.439683 | 8.601387 | 9.321513 | 8.568432 | 8.465172 | 0.25    | -0.0306   | 0.00038  | 9.31E-05  | 1.939291 | 9  |
| 10993_at | YJR016C | ILV3   | 10.82171  | 10.90901  | 10.54852 | 10.56783 | 10.19698  | 10.52424  | 11.09576 | 10.56215 | 11.34335  | 10.60173 | 10.7907  | 11.03995 | 10.00724 | 10.16304 | 10.19468 | 10.80727 | -0.141  | -0.106    | 0.00827  | 0.001319  | 1.62831  | 15 |
| 10994_at | YJR017C | ESS1   | 8.762105  | 8.220994  | 8.971536 | 8.424969 | 8.399178  | 8.93602   | 8.306134 | 7.985304 | 8.413414  | 8.263545 | 7.991633 | 8.225472 | 7.149779 | 6.768383 | 7.825089 | 8.227311 | -0.286  | -0.0328   | 0.00106  | 0.000224  | 2.133604 | 16 |
| 10995_at | YJR018W |        | 5.438674  | 5.072823  | 5.561208 | 4.932702 | 5.002018  | 5.251609  | 4.949892 | 4.847513 | 5.058596  | 5.051426 | 4.967645 | 4.752104 | 5.861672 | 5.424477 | 4.792757 | 4.935045 | 0.073   | 0.164     | 0.000204 | 6.18E-05  | 1.651683 | 13 |
| 10996_at | YJR019C | TES1   | 7.6006    | 7.151967  | 7.546768 | 8.549862 | 8.58067   | 8.547039  | 8.289441 | 8.58527  | 8.869005  | 8.687125 | 8.357614 | 8.385983 | 9.444161 | 8.925176 | 9.174245 | 8.704653 | 0.389   | -0.1      | 0.000249 | 6.52E-05  | 2.800949 | 7  |
| 10997_at | YJR020W |        | 3.833284  | 3.641505  | 4.098236 | 3.265491 | 3.31186   | 3.595133  | 3.515424 | 3.367149 | 3.524264  | 3.677406 | 3.551243 | 3.367927 | 3.522942 | 3.548915 | 3.501104 | 3.415639 | -0.0605 | 0.0713    | 0.0379   | 0.005062  | 1.308960 | 14 |
| 10998_at | YJR021C | REC107 | 6.160182  | 5.779687  | 6.434638 | 6.258994 | 6.17623   | 6.419571  | 6.10017  | 6.236056 | 6.139121  | 6.793329 | 6.625509 | 6.37255  | 6.516169 | 6.605389 | 6.509489 | 6.40469  | 0.129   | -0.02     | 0.0262   | 0.003636  | 1.407311 | 13 |
| 10999_at | YJR021C | REC107 | 3.836182  | 3.44597   | 3.98267  | 3.631216 | 3.755568  | 3.561838  | 3.719493 | 3.76095  | 3.659491  | 4.197503 | 3.975026 | 3.79989  | 3.809605 | 3.501279 | 3.646202 | 3.811589 | 0.00606 | -0.0334   | 0.617    | 0.061491  | 1.09484  | 13 |
| 11000_at | YJR022W | LSM8   | 10.30665  | 9.946598  | 6.683094 | 6.167789 | 6.1375109 | 6.3051139 | 6.375281 | 5.807295 | 5.565361  | 6.335804 | 6.148676 | 5.753243 | 6.492971 | 6.108465 | 6.203357 | 5.876568 | 0.0222  | 0.106     | 0.139    | 0.016119  | 1.324357 | 13 |
| 11001_at | YJR023C |        | 4.618484  | 4.448549  | 5.186516 | 4.411179 | 4.568505  | 4.411197  | 4.41716  | 4.208458 | 4.521866  | 4.538002 | 4.589738 | 4.421086 | 4.579272 | 4.427259 | 4.586699 | 4.371677 | -0.0494 | 0.073     | 0.106    | 0.012633  | 1.29178  | 13 |
| 11002_at | YJR024C |        | 6.961234  | 6.067245  | 7.042514 | 6.710391 | 7.015509  | 6.568346  | 6.142714 | 6.015604 | 6.263583  | 6.24822  | 6.097604 | 5.925539 | 5.105979 | 5.241712 | 4.936294 | 6.18469  | -0.425  | -0.0752   | 7.92E-05 | 2.52E-05  | 3.082737 | 16 |
| 11003_at | YJR025C | BNA1   | 9.345379  | 8.912868  | 9.145264 | 9.173311 | 9.591862  | 9.527968  | 9.114421 | 8.867612 | 9.671427  | 8.792153 | 9.035308 | 8.774426 | 7.428545 | 7.001357 | 7.331829 | 9.151848 | -0.508  | -0.257    | 1.82E-07 | 2.54E-07  | 4.473634 | 17 |
| 11004_at | YJR030C |        | 10.821348 | 10.90901  | 10.54852 | 10.56783 | 10.19698  | 10.52424  | 11.09576 | 10.56215 | 11.34335  | 10.60173 | 10.7907  | 11.03995 | 10.00724 | 10.16304 | 10.19468 | 10.80727 | -0.141  | -0.106    | 0.00827  | 0.001319  | 1.62831  | 15 |
| 11005_at | YJR031C | CEA1   | 5.936443  | 5.577771  | 5.40312  | 5.150964 | 5.044792  | 4.95019   | 5.274599 | 4.899137 | 5.063395  | 4.608626 | 5.065111 | 4.799969 | 4.768306 | 4.624068 | 4.091519 | 4.831123 | -0.29   | 0.0623    | 0.000329 | 8.22E-05  | 2.156191 | 16 |
| 11006_at | YJR032W | GP17   | 4.828539  | 4.574367  | 5.420559 | 4.600206 | 4.787351  | 4.482755  | 4.31954  | 3.938123 | 4.296032  | 4.177504 | 4.206681 | 4.691862 | 3.90227  | 4.094943 | 4.082189 | 4.2812   | -0.222  | 0.0561    | 0.0069   | 0.001129  | 1.800931 | 16 |
| 11007_at | YJR033C | RAV1   | 5.814466  | 5.979279  | 6.036694 | 6.008814 | 6.057965  | 5.72546   | 6.067908 | 6.667033 | 5.968342  | 5.155815 | 6.405731 | 5.848087 | 5.589026 | 5.904221 | 5.431026 | 5.801296 | -0.0927 | -0.000875 | 0.223    | 0.024639  | 1.278701 | 15 |
| 11008_at | YJR034W | PT191  | 6.662487  | 6.867054  | 7.502302 | 8.119783 | 8.083286  | 8.203817  | 8.18909  | 8.065776 | 8.076925  | 7.509916 | 6.669679 | 6.298977 | 7.392202 | 4.953677 | 7.37402  | 8.135655 | 0.0523  | -0.244    | 0.00238  | 0.000447  | 9.64579  | 12 |
| 11009_at | YJR035W | RAD26  | 4.600759  | 4.592805  | 5.164627 | 4.743565 | 4.660249  | 4.380558  | 5.128881 | 4.974009 | 4.470627  | 4.842915 | 4.899001 | 4.705443 | 4.710342 | 4.685959 | 4.493893 | 4.797289 | -0.025  | -0.0286   | 0.616    | 0.061417  | 1.15139  | 13 |
| 11010_at | YJL011C | RPC17  | 5.71392   | 5.186864  | 5.798026 | 5.031792 | 5.31348   | 4.845191  | 4.787273 | 4.996294 | 4.700886  | 4.838986 | 4.65776  | 3.96744  | 4.110218 | 3.896506 | 4.805389 | 4.622585 | -0.423  | 0.0356    | 0.00018  | 0.751E-06 | 3.066776 | 16 |
| 11011_at | YJL010C | NOP9   | 6.605865  | 6.844095  | 6.818189 | 6.437087 | 6.469362  | 6.130801  | 5.793866 | 6.508748 | 6.092058  | 6.383018 | 6.084923 | 5.809486 | 5.969793 | 5.159372 | 5.395094 | 6.068629 | -0.31   | 0.013     | 0.000587 | 0.000135  | 2.2739   | 16 |
| 11012_at | YJL009W |        | 6.601561  | 6.611428  | 6.661518 | 5.7899   | 6.220772  | 5.958953  | 6.231534 | 6.053796 | 6.12155   | 6.436255 | 6.302728 | 5.629162 | 6.342906 | 6.402909 | 6.086489 | 6.018918 | -0.0649 | 0.114     | 0.031    | 0.004235  | 1.461504 | 13 |
| 11013_at | YJL008C | CCT8   | 8.340392  | 7.945909  | 8.498467 | 8.048628 | 7.97158   | 7.934282  | 7.148038 | 7.559331 | 7.781727  | 7.966037 | 7.889742 | 7.566414 | 7.700977 | 7.684268 | 7.537898 | 7.673477 | -0.144  | 0.0771    | 0.0318   | 0.004328  | 1.518516 | 16 |
| 11014_at | YJL007C |        | 4.233353  | 3.889846  | 4.826951 | 3.856955 | 3.957416  | 3.877718  | 3.915399 | 3.554811 | 3.586657  | 3.660301 | 3.808154 | 3.447739 | 3.770396 | 3.701031 | 3.91352  | 3.639054 | -0.134  | 0.115     | 0.00648  | 0.00107   | 1.635612 | 14 |
| 11015_at | YJL006C | CTK2   | 6.903434  | 6.647387  | 7.343429 | 6.947312 | 7.108983  | 6.727032  | 6.590084 | 6.492308 | 6.536194  | 6.537103 | 6.884231 | 6.814732 | 6.561986 | 6.555996 | 6.529372 | 6.686181 | -0.102  | 0.0212    | 0.113    | 0.013487  | 1.311217 | 13 |
| 11016_at | YJL005W | CYR1   | 5.000483  | 4.910604  | 5.664186 | 5.684462 | 5.781304  | 5.263867  | 5.64037  | 5.467401 | 5.5746802 | 5.165836 | 5.789763 | 6.413033 | 6.488533 | 5.961356 | 6.439082 | 5.757338 | 0.274   | -0.00204  | 0.00779  | 0.001252  | 2.069411 | 17 |
| 11017_at | YJL004C | SYS1   | 7.809155  | 7.442004  | 7.202339 | 7.38277  | 7.684169  | 7.115919  | 7.556821 | 7.171488 |           |          |          |          |          |          |          |          |         |           |          |           |          |    |

|           |         |          |          |          |          |          |          |          |          |          |          |          |          |          |          |           |          |          |         |          |          |          |          |    |
|-----------|---------|----------|----------|----------|----------|----------|----------|----------|----------|----------|----------|----------|----------|----------|----------|-----------|----------|----------|---------|----------|----------|----------|----------|----|
| 11052_at  | YJL016W | 7.392332 | 7.555659 | 8.023654 | 8.16091  | 8.438483 | 8.321846 | 8.265352 | 7.934436 | 8.21956  | 8.108221 | 8.208536 | 8.123398 | 8.152967 | 7.986329 | 8.6405    | 8.280834 | 0.127    | -0.0829 | 0.0316   | 0.004305 | 1.498483 | 13       |    |
| 11053_at  | YJL015C | 3.931187 | 3.827661 | 4.051109 | 3.635044 | 3.828433 | 4.083429 | 3.905348 | 4.030984 | 3.837607 | 3.780095 | 3.895301 | 4.125333 | 4.270245 | 4.576887 | 4.972309  | 3.936908 | 0.162    | 0.0928  | 0.00106  | 0.000224 | 1.648137 | 13       |    |
| 11054_at  | YJL014W | CCT3     | 8.414544 | 7.900581 | 7.557973 | 7.53367  | 7.620657 | 7.509489 | 7.515435 | 7.490783 | 7.67078  | 8.228442 | 7.888343 | 7.529881 | 7.471156 | 8.460064  | 8.346888 | 7.663055 | 0.168   | 0.154    | 0.000961 | 0.000206 | 1.906735 | 8  |
| 11055_at  | YJL013C | MAD3     | 4.666697 | 4.062123 | 4.502694 | 4.11734  | 4.377923 | 3.917283 | 3.852498 | 4.177886 | 3.951845 | 4.001865 | 4.156439 | 4.063309 | 4.015409 | 3.744459  | 4.013076 | -0.0884  | 0.0307  | 0.0739   | 0.000917 | 1.264185 | 8        |    |
| 11056_at  | YJL012C | VTC4     | 8.426638 | 8.292056 | 8.303993 | 8.221462 | 8.344732 | 8.331708 | 7.774265 | 8.045755 | 8.185976 | 8.341176 | 8.223053 | 8.191293 | 8.974944 | 8.469888  | 8.60897  | 8.166742 | 0.0872  | 0.097    | 0.000335 | 0.000601 | 1.453108 | 13 |
| 11057_at  | YJL055W |          | 10.56901 | 10.38342 | 10.82618 | 10.86561 | 10.80706 | 10.83159 | 10.57705 | 10.85383 | 10.73881 | 10.99107 | 10.41299 | 10.57392 | 10.77537 | 10.81152  | 10.73265 | 0.0305   | -0.011  | 0.676    | 0.066769 | 1.083437 | 13       |    |
| 11058_at  | YJL054W | TIM54    | 7.100638 | 7.080143 | 6.754176 | 7.224262 | 7.235908 | 7.265111 | 7.475014 | 7.429109 | 7.235391 | 7.807885 | 7.271333 | 7.677264 | 7.503267 | 7.497934  | 7.110813 | 7.488351 | 0.116   | -0.0877  | 0.00491  | 0.000841 | 1.488744 | 13 |
| 11059_at  | YJL053W | PEP8     | 6.792369 | 6.885278 | 6.816118 | 6.940804 | 6.993312 | 6.957512 | 6.799637 | 6.946362 | 6.808317 | 6.962243 | 6.903108 | 6.760875 | 6.787412 | 7.049682  | 7.044864 | 6.900625 | 0.0241  | 0.000679 | 0.49     | 0.04994  | 1.066071 | 13 |
| 11060_at  | YJL052W | TDH1     | 11.90802 | 12.11855 | 12.41808 | 12.17728 | 12.20704 | 12.6353  | 12.17667 | 12.28352 | 12.51178 | 12.56074 | 12.42177 | 12.72401 | 12.47563 | 12.72505  | 12.83522 | 12.47043 | 0.144   | -0.0156  | 0.0101   | 0.001569 | 1.464303 | 13 |
| 11061_g_e | YJL052W | TDH1     | 12.66272 | 12.7343  | 12.84891 | 12.66417 | 12.66417 | 12.95523 | 12.62456 | 12.79136 | 12.92367 | 12.7892  | 12.7706  | 12.98928 | 12.85264 | 13.02679  | 13.05127 | 12.815   | 0.0612  | 0.0128   | 0.0588   | 0.007506 | 1.176193 | 13 |
| 11062_at  | YJL051W | IRC8     | 6.128546 | 6.212036 | 6.331743 | 5.788031 | 5.881145 | 6.182706 | 5.576396 | 5.92682  | 5.839257 | 7.39644  | 6.427084 | 6.111079 | 11.04967 | 10.57416  | 10.70192 | 6.251022 | 1.15    | 0.621    | 4.49E-10 | 7.47E-09 | 32.12664 | 3  |
| 11063_at  | YJL050W | MTR4     | 6.721643 | 6.854429 | 7.019759 | 6.208543 | 6.318313 | 6.318466 | 6.023003 | 5.960117 | 6.07628  | 7.314166 | 6.729029 | 6.445963 | 10.93827 | 10.29037  | 10.39098 | 6.426187 | 0.938   | 0.627    | 7.59E-11 | 3.25E-09 | 21.43214 | 5  |
| 11064_at  | YJL049W |          | 5.794851 | 6.048145 | 6.37867  | 6.111041 | 6.042835 | 5.68631  | 5.788072 | 6.112475 | 5.809134 | 6.41318  | 6.079229 | 5.909349 | 6.639705 | 5.787646  | 7.743823 | 6.035238 | 0.474   | 0.276    | 2.71E-06 | 1.77E-06 | 4.337697 | 8  |
| 11065_at  | YJL048C | UBX6     | 7.099223 | 6.690095 | 6.211015 | 9.045461 | 8.730596 | 7.884919 | 9.365367 | 9.426349 | 8.905896 | 10.51725 | 10.27287 | 10.36367 | 8.46126  | 8.063274  | 7.892798 | 10.00771 | 0.454   | -0.723   | 7.45E-07 | 6.74E-07 | 11.93415 | 10 |
| 11066_at  | YJL047C | RTT101   | 4.771776 | 4.785019 | 5.220622 | 5.206154 | 5.320278 | 5.165601 | 4.857379 | 5.056985 | 4.900677 | 5.11911  | 5.19492  | 5.242465 | 4.783538 | 4.729308  | 4.695993 | 5.133796 | -0.0447 | -0.081   | 0.0216   | 0.003072 | 1.30093  | 13 |
| 11067_at  | YJL046W |          | 4.900743 | 4.714298 | 4.878618 | 5.51403  | 5.544399 | 5.193566 | 5.042822 | 5.48504  | 5.486248 | 5.345451 | 5.25327  | 5.528564 | 4.611897 | 4.168116  | 4.169633 | 5.43158  | -0.133  | -0.234   | 7.42E-06 | 3.78E-06 | 2.150551 | 12 |
| 11068_at  | YJL045W |          | 5.014048 | 4.843924 | 5.674753 | 5.210754 | 5.321943 | 5.547333 | 6.086107 | 6.109738 | 6.06203  | 6.646394 | 6.44749  | 6.223796 | 5.832498 | 5.802208  | 5.4248   | 6.143209 | 0.0998  | -0.26    | 0.00355  | 0.000633 | 2.19979  | 12 |
| 11069_at  | YJL044C | GYP6     | 6.507422 | 6.22625  | 6.214832 | 6.248237 | 6.294308 | 5.841254 | 6.050546 | 6.18237  | 6.189637 | 5.413353 | 5.505289 | 5.635129 | 4.854484 | 3.950371  | 4.522552 | 5.800129 | -0.497  | -0.115   | 4.25E-07 | 4.59E-07 | 3.370774 | 17 |
| 11070_at  | YJL043W |          | 6.094876 | 5.988936 | 6.702472 | 6.087512 | 6.065532 | 6.332827 | 5.921049 | 5.997109 | 6.046419 | 6.102691 | 6.21835  | 6.226566 | 5.940671 | 5.707745  | 5.917821 | 6.001297 | -0.0875 | -0.00808 | 0.14     | 0.016282 | 1.261143 | 13 |
| 11071_at  | YJL042W | MHP1     | 7.768509 | 7.657296 | 7.761791 | 8.140858 | 8.065494 | 8.066308 | 7.602295 | 7.898441 | 8.092738 | 8.118186 | 8.074259 | 8.195508 | 9.351577 | 9.374746  | 9.333777 | 8.098556 | 0.39    | 0.127    | 2.96E-07 | 3.50E-07 | 2.811399 | 8  |
| 11072_at  | YJL041W | NSP1     | 6.15171  | 6.031007 | 6.6878   | 6.493356 | 6.340829 | 6.28339  | 6.463904 | 6.126507 | 6.186178 | 6.143844 | 6.580752 | 6.437502 | 5.828735 | 5.157395  | 6.173592 | 6.198675 | -0.0529 | -0.00781 | 0.599    | 0.059399 | 1.150495 | 8  |
| 11073_at  | YJL039C | NUP192   | 4.905173 | 4.707525 | 4.911406 | 4.259093 | 4.454165 | 4.198616 | 4.327843 | 4.142056 | 4.135614 | 3.812574 | 3.90719  | 4.163268 | 3.587856 | 3.660611  | 3.615302 | 4.021253 | -0.308  | 0.0561   | 9.31E-08 | 1.64E-07 | 2.265448 | 16 |
| 11074_at  | YJL038C |          | 3.756816 | 2.996229 | 3.941196 | 3.071217 | 3.465346 | 3.219808 | 3.933049 | 3.31416  | 3.45331  | 3.823649 | 3.69606  | 3.665454 | 3.780649 | 3.989017  | 3.75533  | 3.54841  | 0.104   | 0.0367   | 0.192    | 0.021545 | 1.316035 | 13 |
| 11075_at  | YJL037W | IRC18    | 5.874805 | 5.667013 | 6.803774 | 6.58682  | 6.632248 | 5.902391 | 6.403242 | 6.362054 | 6.735387 | 5.875059 | 6.602402 | 6.735334 | 6.173407 | 6.786215  | 6.34223  | 6.667884 | 0.0376  | -0.0991  | 0.456    | 0.046869 | 1.350066 | 13 |
| 11076_at  | YJL036W | SNX4     | 5.532822 | 5.339194 | 5.684598 | 5.75568  | 6.090792 | 5.345153 | 5.886007 | 5.954905 | 5.880477 | 5.901512 | 5.712851 | 5.913228 | 5.693972 | 6.10157   | 5.856869 | 5.881064 | 0.0878  | -0.0492  | 0.0796   | 0.09808  | 1.297309 | 8  |
| 11077_at  | YJL035C | TAD2     | 7.345948 | 6.858424 | 7.332047 | 7.027404 | 7.213    | 6.901349 | 7.36578  | 7.090162 | 6.886616 | 7.422523 | 7.563188 | 7.576569 | 8.393673 | 8.194295  | 8.224052 | 7.287697 | 0.281   | 0.106    | 5.3E-06  | 2.94E-06 | 2.134344 | 8  |
| 11078_at  | YJL034W | KAR2     | 10.46617 | 10.38028 | 10.08612 | 10.3949  | 10.41988 | 10.2487  | 10.60419 | 10.03291 | 10.03275 | 10.35856 | 10.5102  | 10.9149  | 11.12984 | 11.72757  | 11.49961 | 10.43968 | 0.296   | 0.122    | 4.79E-05 | 1.67E-05 | 2.267277 | 8  |
| 11079_at  | YJL034C | PRY3     | 8.475413 | 8.007792 | 8.045622 | 8.333159 | 7.983127 | 7.887624 | 7.775281 | 8.460815 | 8.155357 | 9.351498 | 9.365053 | 9.028188 | 9.632964 | 9.355847  | 9.386603 | 8.631273 | 0.41    | 0.0431   | 0.000444 | 0.00106  | 2.966283 | 7  |
| 11080_at  | YJL033C | ICS3     | 4.873805 | 5.124337 | 5.757924 | 5.149657 | 5.424489 | 5.224499 | 5.377278 | 5.45575  | 5.751103 | 5.979658 | 6.03598  | 5.729327 | 5.8635   | 6.066219  | 6.322917 | 5.675571 | 0.247   | -0.06653 | 0.00215  | 0.000412 | 1.924232 | 9  |
| 11081_at  | YJL036W | NET1     | 7.717013 | 7.485792 | 7.77521  | 7.48554  | 7.417557 | 7.29095  | 7.076585 | 7.361541 | 7.114899 | 7.684106 | 7.595648 | 7.411937 | 8.750333 | 8.4741013 | 7.9809   | 7.376304 | 0.12    | 0.134    | 0.016    | 0.002343 | 1.675214 | 13 |
| 11082_at  | YJL035C | APQ13    | 5.028644 | 5.136362 | 5.541215 | 4.910688 | 5.302189 | 5.178836 | 4.55382  | 4.72794  | 4.764179 | 4.87618  | 4.983829 | 4.71154  | 5.386753 | 5.483011  | 5.493792 | 4.82922  | 0.043   | 0.146    | 0.00291  | 0.00053  | 1.504404 | 13 |
| 11083_at  | YJL074C | SMC3     | 5.641603 | 5.404281 | 5.477064 | 5.502617 | 5.497933 | 5.292391 | 5.304178 | 5.393129 | 5.40368  | 5.315388 | 5.236066 | 4.99066  | 5.706688 | 5.257071  | 5.134958 | 5.26274  | -0.0552 | 0.0513   | 0.216    | 0.023931 | 1.327267 | 13 |
| 11084_at  | YJL073W | JEM1     | 5.225757 | 4.84064  | 5.533338 | 5.105229 | 5.211223 | 4.901145 | 4.788521 | 4.714044 | 4.916088 | 5.135333 | 5.114864 | 5.181617 | 4.548659 | 4.689494  | 4.426597 | 4.975181 | -0.136  | -0.0287  | 0.0349   | 0.004707 | 1.425916 | 16 |
| 11085_at  | YJL072C | PSF2     | 5.79024  | 5.101344 | 5.521633 | 5.139758 | 5.361233 | 4.922329 | 4.961863 | 4.865604 | 5.026072 | 4.921262 | 5.078364 | 4.612889 | 4.14381  | 3.68114   | 3.965676 | 4.877206 | -0.379  | -0.0503  | 1.53E-05 | 6.57E-06 | 2.725717 | 16 |
| 11086_at  | YJL071W | ARG2     | 7.644982 | 7.33435  | 7.710861 | 7.799643 | 7.910513 | 7.540036 | 7.453497 | 7.109563 | 7.35518  | 7.071563 | 7.238071 | 7.311357 | 7.161241 | 7.384983  | 6.978821 | 7.354262 | -0.13   | 0.0102   | 0.0481   | 0.006264 | 1.411665 | 16 |
| 11087_at  | YJL070C |          | 5.238757 | 5.537505 | 6.225851 | 6.058298 | 5.618644 | 5.870081 | 5.296894 | 5.462457 | 5.881367 | 5.207875 | 6.03077  | 6.125223 | 6.626978 | 6.31498   | 5.919201 | 5.761288 | 0.143   | 0.064    | 0.122    | 0.01441  | 1.499869 | 13 |
| 11088_at  | YJL069C | UTP18    | 7.943305 | 7.871732 | 8.552127 | 7.882646 | 7.915035 | 7.70703  | 7.353347 | 7.489203 | 7.330968 | 7.170428 | 7.41097  | 6.629951 | 7.177071 | 7.484169  | 6.793115 | 7.269845 | -0.281  | 0.106    | 0.00127  | 0.00026  | 2.104231 | 14 |
| 11089_at  | YJL068C |          | 7.4942   | 7.767599 | 8.956364 | 8.79596  | 8.687189 | 8.835454 | 8.845738 | 8.441854 | 8.780684 | 7.584858 | 8.365077 | 8.566395 | 7.191042 | 7.750676  | 7.828081 | 8.548551 | -0.177  | -0.19    | 0.0198   | 0.00284  | 2.101548 | 15 |
| 11090_at  | YJL067W |          | 5.854246 | 5.426408 | 5.887623 | 5.328203 | 5.633502 | 5.361042 | 5.126453 | 5.575377 | 5.70935  | 5.322027 | 5.731916 | 5.677396 | 5.649405 | 6.133969  | 5.667945 | 5.641735 | 0.0457  | 0.0199   | 0.596    | 0.05953  | 1.137073 | 13 |
| 11091_at  | YJL066C | MPM1     | 7.015241 | 7.084632 | 7.376501 | 8.513166 | 8.379874 | 8.680347 | 9.258931 | 9.152626 | 9.273135 | 9.259207 | 9.325409 | 9.099112 | 8.619737 | 8.930309  | 8.939214 | 9.438625 | 0.442   | -0.398   | 9.21E-08 | 1.64E-07 | 5.341282 | 10 |
| 11092_at  | YJL065C | DSL1     | 7.801324 | 7.754158 | 7.972491 | 7.971705 | 7.717929 | 7.931281 | 7.843007 | 7.923604 | 7.471206 | 7.674694 |          |          |          |           |          |          |         |          |          |          |          |    |

|           |         |        |          |          |          |          |          |          |          |          |          |          |          |          |          |          |          |          |         |          |          |          |          |    |
|-----------|---------|--------|----------|----------|----------|----------|----------|----------|----------|----------|----------|----------|----------|----------|----------|----------|----------|----------|---------|----------|----------|----------|----------|----|
| 11224_at  | YJL125C | GCD14  | 6.058991 | 6.271743 | 5.860455 | 5.679276 | 5.773793 | 5.591287 | 5.679359 | 5.920979 | 5.714437 | 5.708155 | 5.613337 | 5.552503 | 5.401187 | 5.515313 | 5.126842 | 5.628822 | -0.172  | 0.0182   | 0.000515 | 0.000121 | 1.576205 | 16 |
| 11225_at  | YJL124C | LSM1   | 6.843212 | 6.989191 | 6.934057 | 6.672373 | 6.758519 | 6.556946 | 6.40253  | 6.82022  | 6.534319 | 6.194935 | 5.903395 | 6.040526 | 5.142175 | 6.019536 | 5.067832 | 6.296023 | -0.408  | -0.0345  | 1.11E-05 | 5.13E-06 | 2.946198 | 16 |
| 11226_at  | YJL123C |        | 9.343722 | 9.351547 | 9.576919 | 9.319102 | 9.35273  | 8.875413 | 9.284401 | 9.511101 | 9.21406  | 9.189733 | 8.462635 | 7.992103 | 7.81548  | 8.137943 | 7.850951 | 8.861116 | -0.408  | -0.0489  | 0.000128 | 3.74E-05 | 2.951125 | 16 |
| 11227_at  | YJL122W | ALB1   | 8.114376 | 8.341117 | 8.491841 | 7.720024 | 7.866121 | 7.699298 | 7.332132 | 7.565397 | 7.91104  | 7.565391 | 6.953497 | 6.687532 | 5.916339 | 6.480873 | 5.665143 | 7.187222 | -0.585  | -0.00519 | 1.62E-06 | 1.22E-06 | 4.179341 | 18 |
| 11228_at  | YJL121C | RPE1   | 8.904412 | 9.109622 | 9.173364 | 9.244852 | 9.090895 | 9.44135  | 8.735894 | 8.840442 | 8.862052 | 8.450616 | 6.890525 | 9.307213 | 7.966252 | 6.881367 | 8.432536 | 8.903262 | -0.196  | -0.0479  | 0.012    | 0.001828 | 1.679305 | 16 |
| 11229_at  | YJL120W |        | 5.042288 | 4.907351 | 4.820696 | 4.728246 | 4.687338 | 4.600368 | 4.664404 | 4.830162 | 4.805933 | 4.699164 | 5.039092 | 4.567713 | 4.503496 | 5.676831 | 5.265936 | 4.775415 | 0.0926  | 0.0973   | 0.00738  | 0.001195 | 1.467615 | 13 |
| 1130_at   | YJL119C |        | 5.608602 | 5.635231 | 5.421057 | 5.154301 | 5.525096 | 5.590611 | 5.378945 | 5.527943 | 5.382173 | 5.954061 | 5.899837 | 5.687759 | 5.970564 | 6.198856 | 5.891903 | 5.608093 | 0.15    | 0.0461   | 0.00248  | 0.000463 | 1.490129 | 13 |
| 1131_at   | YJL118W |        | 7.775492 | 7.311218 | 7.150166 | 7.366833 | 7.342653 | 7.02465  | 6.43791  | 6.414082 | 6.466112 | 7.167388 | 7.139971 | 7.134165 | 6.593761 | 7.444962 | 6.938546 | 6.849311 | -0.107  | 0.115    | 0.136    | 0.015867 | 1.567008 | 14 |
| 1132_at   | YJL117W | PHO86  | 8.869599 | 8.969156 | 8.996822 | 9.244043 | 9.134196 | 8.943387 | 8.771807 | 8.517802 | 9.344857 | 8.740815 | 9.114961 | 9.280153 | 8.241962 | 8.440377 | 8.594571 | 9.002692 | -0.124  | -0.0863  | 0.0175   | 0.002549 | 1.511713 | 15 |
| 1133_at   | YJL116C | NCA3   | 9.13261  | 8.932325 | 8.425843 | 10.3653  | 10.22875 | 10.26412 | 11.18705 | 11.60368 | 11.42657 | 11.24445 | 11.54032 | 11.85013 | 10.33035 | 10.39731 | 10.26043 | 11.48442 | 0.411   | -0.528   | 6.22E-07 | 5.99E-07 | 6.95064  | 10 |
| 1134_at   | YJL115W | ASF1   | 8.049406 | 8.036276 | 8.452607 | 7.676582 | 7.960752 | 7.861434 | 7.688862 | 7.656196 | 7.645657 | 8.300504 | 7.561097 | 7.05216  | 8.190997 | 7.597782 | 7.665169 | 7.631296 | -0.0925 | 0.101    | 0.101    | 0.012122 | 1.481306 | 13 |
| 1135_at   | YJL112W | MDV1   | 6.530365 | 6.367258 | 6.648579 | 7.231199 | 7.247516 | 6.738262 | 6.375481 | 7.674104 | 7.308112 | 7.766504 | 7.232752 | 7.164264 | 7.065626 | 6.73908  | 6.511117 | 7.422589 | 0.054   | -0.206   | 0.00161  | 0.000319 | 1.796916 | 12 |
| 1136_at   | YJL111W | CCT7   | 7.506942 | 7.214824 | 7.806647 | 7.607425 | 7.512206 | 7.404585 | 6.88027  | 7.149799 | 7.307416 | 7.157176 | 6.77885  | 7.006888 | 6.551732 | 6.565569 | 6.734506 | 7.104632 | -0.247  | -0.00743 | 0.000312 | 7.87E-05 | 1.922737 | 16 |
| 1137_at   | YJL110C | GZF3   | 6.083853 | 5.822954 | 6.151666 | 6.549515 | 6.359365 | 5.610418 | 6.195222 | 6.331652 | 6.486015 | 6.739164 | 6.646775 | 6.235753 | 5.961671 | 5.345083 | 5.834228 | 6.413165 | -0.047  | -0.154   | 0.0236   | 0.003319 | 1.543888 | 12 |
| 1138_at   | YJL109C | UTP10  | 7.14966  | 7.020447 | 7.70535  | 6.872168 | 7.001981 | 7.07096  | 6.203551 | 6.554515 | 6.248985 | 5.80364  | 5.835037 | 5.710683 | 5.615818 | 5.817477 | 5.665705 | 6.130769 | -0.46   | 0.108    | 8.32E-06 | 4.12E-06 | 3.388423 | 16 |
| 1139_at   | YJL108C | PRM10  | 8.722295 | 8.606522 | 8.248771 | 9.344852 | 9.128575 | 8.482385 | 8.966162 | 9.413602 | 9.824816 | 9.952736 | 9.581638 | 8.663392 | 8.931739 | 8.53812  | 8.180762 | 9.272272 | 0.0322  | -0.204   | 0.0302   | 0.004133 | 1.723382 | 12 |
| 1140_at   | YJL107C |        | 3.90101  | 3.37748  | 4.074551 | 3.569296 | 3.602298 | 3.502293 | 4.104573 | 4.273605 | 3.943402 | 4.589937 | 4.221165 | 3.489162 | 3.175978 | 3.350099 | 3.968692 | -0.0575  | -0.112  | 0.167    | 0.018988 | 1.428296 | 12       |    |
| 1141_at   | YJL106W | IME2   | 3.981651 | 3.563039 | 4.421247 | 4.687041 | 4.618437 | 4.072718 | 3.853053 | 3.927448 | 4.376823 | 3.839768 | 4.187794 | 4.513185 | 4.380581 | 4.135078 | 4.489326 | 2.452325 | 0.0623  | -0.0165  | 0.656    | 0.065014 | 1.179504 | 13 |
| 1142_at   | YJL105W | SET4   | 6.940586 | 6.556152 | 7.249401 | 8.117763 | 8.221376 | 7.266964 | 7.745825 | 7.130514 | 7.833848 | 6.980986 | 7.244534 | 5.752526 | 6.915287 | 6.758269 | 7.400696 | 7.599315 | -0.0355 | -0.162   | 0.0987   | 0.011899 | 1.54307  | 12 |
| 1143_at   | YJL104W | PAM16  | 5.940244 | 5.694695 | 6.663995 | 6.118789 | 6.216528 | 5.974638 | 5.867807 | 6.655922 | 6.692578 | 6.880236 | 5.754849 | 5.592962 | 5.96331  | 5.587442 | 5.777834 | 5.768173 | -0.101  | 0.0524   | 0.135    | 0.015736 | 1.335763 | 13 |
| 1144_at   | YJL103C | GSM1   | 4.67365  | 4.398596 | 5.120044 | 4.541708 | 4.568774 | 4.979089 | 4.515758 | 5.276837 | 5.406818 | 4.870961 | 5.336801 | 5.80542  | 6.832905 | 5.947109 | 5.721909 | 5.381622 | 0.245   | -0.0331  | 0.00747  | 0.001207 | 1.916846 | 9  |
| 1145_at   | YJL102W | MEF2   | 6.256791 | 6.244119 | 6.814272 | 6.810697 | 6.862875 | 6.379574 | 6.718402 | 6.45939  | 6.312046 | 6.432834 | 6.924261 | 6.608918 | 7.057524 | 7.193172 | 7.014444 | 6.643326 | 0.153   | 0.0363   | 0.0156   | 0.002293 | 1.502143 | 13 |
| 1146_at   | YJL101C | GSH1   | 7.026887 | 6.753523 | 7.130505 | 7.583916 | 7.530718 | 7.175344 | 7.734339 | 7.304713 | 7.756816 | 7.666322 | 8.331547 | 8.592329 | 8.654372 | 8.784762 | 9.191021 | 7.931244 | 0.509   | -0.00325 | 3.89E-06 | 2.33E-06 | 3.850439 | 7  |
| 1147_at   | YJL146W | IDS2   | 5.955184 | 5.800089 | 6.225376 | 6.03175  | 6.11815  | 6.143063 | 6.634091 | 5.733809 | 5.823648 | 5.404146 | 5.722539 | 5.61771  | 5.986656 | 5.602199 | 6.00626  | 5.737801 | -0.0671 | 0.0584   | 0.138    | 0.016052 | 1.283085 | 13 |
| 1148_at   | YJL145W | SFH5   | 6.469798 | 6.425595 | 6.78502  | 5.797289 | 6.058044 | 5.887662 | 4.72878  | 4.92659  | 6.084675 | 4.17402  | 4.620235 | 4.310561 | 5.696673 | 5.029107 | 5.429439 | 4.749445 | -0.379  | 0.348    | 7.74E-05 | 2.47E-05 | 4.627227 | 14 |
| 1149_at   | YJL144W |        | 5.693529 | 5.899538 | 6.821375 | 6.762838 | 6.749059 | 5.997602 | 6.787109 | 7.387496 | 7.03244  | 7.858303 | 7.576487 | 7.480718 | 9.30389  | 9.212388 | 9.663638 | 7.423583 | 0.828   | 0.0957   | 6.2E-08  | 1.37E-07 | 8.985036 | 6  |
| 1150_at   | YJL143W | TIM17  | 10.2161  | 9.751575 | 10.07316 | 10.26782 | 10.35017 | 10.40789 | 9.780878 | 10.31792 | 10.09961 | 10.08225 | 9.980951 | 10.02513 | 9.673276 | 9.238642 | 9.867673 | 10.13639 | -0.126  | -0.0871  | 0.00968  | 0.001509 | 1.519153 | 15 |
| 1151_at   | YJL142C | IRC9   | 5.348948 | 5.28311  | 5.994352 | 5.913484 | 6.046091 | 6.103955 | 5.678364 | 5.669368 | 5.865188 | 6.250163 | 6.011478 | 6.738153 | 7.165718 | 7.007534 | 5.550905 | 6.145766 | 0.432   | 0.0715   | 2.09E-05 | 8.50E-06 | 3.145884 | 7  |
| 1152_g_e  | YJL142C | IRC1   | 7.054217 | 6.603945 | 7.136783 | 8.245333 | 8.082192 | 8.314743 | 8.179412 | 8.157914 | 8.51974  | 9.051877 | 8.87333  | 9.194181 | 9.596932 | 9.599965 | 10.30353 | 8.826511 | 0.74    | -0.118   | 2.17E-08 | 6.13E-08 | 7.109388 | 4  |
| 1153_at   | YJL141C | YAK9   | 7.061803 | 6.439828 | 6.644624 | 7.797647 | 7.529583 | 7.489845 | 7.551166 | 7.811932 | 8.29938  | 8.778252 | 8.565237 | 8.602281 | 9.072256 | 8.904491 | 9.432202 | 8.346154 | 0.644   | -0.116   | 7.45E-08 | 1.40E-07 | 5.513108 | 6  |
| 1154_at   | YJL140W | RPB4   | 5.972343 | 5.616336 | 6.706861 | 5.589918 | 5.640166 | 5.155505 | 5.108947 | 5.128137 | 4.719311 | 5.782155 | 5.434908 | 5.436443 | 6.133673 | 5.98076  | 6.13265  | 5.241575 | 0.0293  | 0.231    | 0.00544  | 0.000916 | 1.803648 | 13 |
| 1155_at   | YJL139C | YUR1   | 7.541069 | 7.010259 | 7.324422 | 7.453239 | 7.567861 | 7.136865 | 7.003285 | 8.61814  | 7.26163  | 6.595189 | 6.849924 | 6.890016 | 5.913342 | 5.952164 | 6.207164 | 6.965019 | -0.346  | -0.0803  | 9.29E-06 | 4.50E-06 | 2.499404 | 16 |
| 1156_s_a  | YJL138C | TIF2   | 11.08226 | 11.16868 | 11.47653 | 11.24884 | 11.17851 | 11.36598 | 10.50627 | 10.6764  | 11.16479 | 10.00686 | 10.26013 | 11.30114 | 10.37863 | 10.27478 | 10.34099 | 10.7865  | -0.258  | 0.00522  | 0.00993  | 0.001544 | 1.979627 | 16 |
| 1157_at   | YJL137C | GLG2   | 5.113362 | 5.108864 | 5.507787 | 5.531005 | 5.220929 | 5.079309 | 4.874928 | 5.228649 | 5.353224 | 5.347693 | 5.10478  | 5.481873 | 4.967648 | 4.949522 | 4.820441 | 5.114046 | -0.0979 | -0.0709  | 0.291    | 0.031311 | 1.928327 | 13 |
| 1158_i_at | YJL136C | RPS21B | 12.72228 | 12.81035 | 13.29405 | 12.97928 | 12.91037 | 13.02572 | 12.46614 | 12.37748 | 12.08137 | 11.39149 | 11.53002 | 12.08915 | 10.58398 | 11.13057 | 11.24724 | 12.10337 | -0.56   | -0.0288  | 1.28E-05 | 5.75E-06 | 4.41854  | 16 |
| 1159_s_a  | YJL136C | RPS21B | 11.27763 | 11.48435 | 11.91161 | 11.31206 | 11.30111 | 11.37804 | 10.82293 | 10.6031  | 10.57279 | 9.565942 | 9.842574 | 10.68305 | 9.73492  | 10.13564 | 10.06234 | 10.43706 | -0.467  | 0.0998   | 0.000161 | 4.51E-05 | 3.450799 | 18 |
| 1160_at   | YJL135W |        | 4.019705 | 3.78904  | 5.014887 | 3.854902 | 4.065357 | 3.948532 | 4.278783 | 3.885442 | 3.842126 | 3.990507 | 4.293488 | 3.960339 | 4.609968 | 4.175578 | 4.345056 | 3.983176 | 0.0378  | 0.0918   | 0.193    | 0.021677 | 1.318055 | 13 |
| 1161_at   | YJL134W | LCB3   | 7.50172  | 7.880411 | 7.768189 | 7.862777 | 7.888871 | 7.866226 | 8.413281 | 7.872837 | 7.682038 | 7.76793  | 7.692477 | 8.051666 | 7.391846 | 8.070242 | 7.841136 | 7.925114 | 0.00277 | -0.0486  | 0.498    | 0.050639 | 1.129644 | 13 |
| 1162_at   | YJL133W | MRS3   | 7.168856 | 7.1347   | 7.066751 | 7.162343 | 7.23188  | 7.283531 | 6.972287 | 7.035101 | 7.02326  | 6.579045 | 6.841263 | 7.02326  | 7.152466 | 7.46792  | 7.209172 | 6.981655 | 0.00562 | 0.0649   | 0.139    | 0.016167 | 1.176714 | 13 |
| 1163_at   | YJL132W |        | 5.079009 | 5.366302 | 5.200838 | 5.770556 | 5.603536 | 5.481342 | 6.06564  | 5.923359 | 5.936276 | 5.851863 | 5.766055 | 6.452977 | 5.385593 | 6.106696 | 5.413751 | 5.933799 | 0.119   | -0.158   | 0.0043   | 0.000748 | 1.773724 | 12 |
| 1164_at   | YJL131C |        | 6.876653 | 6.742763 | 6.806278 | 7.234952 | 7.189042 | 6.862705 | 6.95     |          |          |          |          |          |          |          |          |          |         |          |          |          |          |    |

|           |         |        |          |          |          |          |          |          |          |          |          |          |          |          |          |          |          |          |          |          |          |          |          |    |
|-----------|---------|--------|----------|----------|----------|----------|----------|----------|----------|----------|----------|----------|----------|----------|----------|----------|----------|----------|----------|----------|----------|----------|----------|----|
| 1196_at   | YJL184W | GON7   | 7.401469 | 7.322411 | 8.1145   | 7.367014 | 7.112605 | 7.616078 | 7.087514 | 7.535939 | 7.239109 | 7.739408 | 7.3281   | 7.32172  | 7.040334 | 7.330793 | 7.420358 | 7.34146  | -0.0674  | 0.0242   | 0.46     | 0.047208 | 1.195707 | 13 |
| 1197_at   | YJL183W | MNN11  | 7.760331 | 7.946144 | 8.348552 | 7.597032 | 7.731129 | 7.786254 | 7.481514 | 7.508586 | 7.730812 | 7.689252 | 7.178469 | 7.462128 | 7.323572 | 7.634799 | 7.289274 | 7.487329 | -0.157   | 0.0632   | 0.000315 | 0.00057  | 1.517531 | 16 |
| 1198_at   | YJL182C |        | 4.927391 | 4.668203 | 4.67119  | 4.409574 | 4.600784 | 4.86725  | 4.670543 | 4.436172 | 4.626781 | 4.067147 | 4.61225  | 4.32174  | 4.670721 | 4.892351 | 4.476056 | 4.38402  | -0.0345  | 0.0943   | 0.0694   | 0.008715 | 1.327832 | 13 |
| 1199_at   | YJL181W |        | 6.917818 | 7.265179 | 7.195411 | 7.245358 | 7.262785 | 6.407565 | 6.907054 | 7.172754 | 6.820295 | 6.984129 | 6.952613 | 6.099021 | 6.619807 | 6.191663 | 6.991371 | -0.218   | -0.0218  | 0.000111 | 0.33E-05 | 1.781898 | 16       |    |
| 1200_at   | YJL180C | ATP12  | 6.796162 | 6.848852 | 6.447085 | 7.094943 | 7.546589 | 6.627827 | 6.764483 | 6.525572 | 6.705352 | 6.250279 | 6.287443 | 5.890549 | 6.003928 | 5.98047  | 5.609754 | 6.537518 | -0.276   | -0.0611  | 0.000384 | 0.00677  | 2.07672  | 16 |
| 1201_at   | YJL179W | PFD1   | 4.40048  | 4.692761 | 4.706786 | 3.975918 | 4.46538  | 4.076496 | 3.624155 | 3.816772 | 3.602869 | 3.463978 | 3.449451 | 3.28272  | 3.253558 | 3.568885 | 3.431178 | 3.563469 | -0.328   | 0.127    | 5.74E-06 | 3.10E-06 | 2.386282 | 14 |
| 1202_at   | YJL178C | ATG27  | 7.670146 | 7.420585 | 7.532366 | 7.39786  | 7.176744 | 6.904578 | 7.109564 | 7.131716 | 7.208034 | 7.017838 | 7.024367 | 7.010635 | 6.365    | 6.735779 | 6.233503 | 7.023688 | -0.266   | -0.0112  | 2.29E-05 | 9.13E-06 | 2.026193 | 16 |
| 1203_i_at | YJL177W | RPL17B | 11.68328 | 11.66419 | 11.74466 | 10.77875 | 11.03533 | 11.05499 | 10.05359 | 10.23505 | 10.04605 | 9.165389 | 9.172159 | 8.997688 | 7.733958 | 7.901889 | 7.984635 | 9.644061 | -1.03    | 0.0461   | 1.10E-10 | 3.87E-09 | 15.53059 | 20 |
| 1204_s_a  | YJL177W | RPL17B | 11.88495 | 11.8536  | 12.26072 | 11.73587 | 11.67683 | 11.9338  | 10.89977 | 10.94311 | 10.96127 | 10.15933 | 10.23537 | 10.63056 | 9.033024 | 8.740134 | 9.521028 | 10.7334  | -0.788   | -0.0427  | 1.2E-07  | 1.93E-07 | 8.068588 | 18 |
| 1205_i_at | YJL177W | RPL17B | 12.27338 | 12.49664 | 12.85371 | 12.28283 | 12.33903 | 12.27279 | 10.84127 | 11.3406  | 11.28779 | 10.6255  | 10.62926 | 10.56611 | 10.0708  | 10.45331 | 10.44635 | 11.03501 | -0.639   | 0.122    | 1.33E-05 | 5.89E-06 | 5.433998 | 18 |
| 1206_f_at | YJL177W | RPL17B | 11.59464 | 11.58364 | 12.274   | 11.58485 | 11.62221 | 11.85379 | 10.2989  | 10.80288 | 10.79824 | 9.917046 | 9.88647  | 10.37308 | 9.2647   | 9.101607 | 9.751645 | 10.49498 | -0.691   | 0.0391   | 1.18E-05 | 5.42E-06 | 6.249537 | 18 |
| 1207_at   | YJL176C | SWI3   | 4.001982 | 3.732507 | 4.241293 | 3.528975 | 3.576929 | 3.748387 | 3.372658 | 3.575171 | 3.515518 | 3.495553 | 3.60696  | 3.51478  | 3.560104 | 3.248321 | 3.391459 | 3.469964 | -0.139   | 0.0605   | 0.00165  | 0.000326 | 1.446543 | 16 |
| 1208_at   | YJL175W |        | 5.201913 | 4.576924 | 5.485243 | 4.982419 | 4.838204 | 5.067559 | 4.554865 | 4.537504 | 4.889749 | 4.532904 | 4.759953 | 4.413801 | 4.570541 | 4.367628 | 4.463812 | 4.64427  | -0.171   | 0.0392   | 0.0124   | 0.001869 | 1.574358 | 16 |
| 1209_at   | YJL174W | KRE9   | 8.921732 | 8.601919 | 9.000739 | 9.477322 | 9.485015 | 9.264432 | 9.478526 | 9.676883 | 9.822457 | 10.11471 | 9.972684 | 10.20287 | 9.177409 | 9.067631 | 9.746839 | 9.891808 | 0.161    | -0.225   | 0.00012  | 3.55E-05 | 2.231384 | 9  |
| 1210_at   | YJL173C | RFA3   | 7.972194 | 7.817923 | 8.953454 | 8.663496 | 8.551283 | 8.659441 | 7.283105 | 7.385582 | 7.841847 | 7.36743  | 7.290789 | 7.749357 | 6.946509 | 7.087054 | 7.129582 | 7.705941 | -0.358   | -0.0244  | 0.0092   | 0.001443 | 2.582525 | 16 |
| 1211_at   | YJL172W | CP51   | 6.086019 | 5.674852 | 5.485191 | 6.148865 | 6.024628 | 5.777364 | 6.008326 | 5.695586 | 6.189727 | 5.843646 | 6.060456 | 6.457054 | 5.910327 | 5.942935 | 5.956597 | 6.054518 | 0.0551   | -0.0578  | 0.242    | 0.026491 | 1.256592 | 13 |
| 1212_at   | YJL171C |        | 8.534215 | 8.27281  | 8.333443 | 8.796441 | 8.548959 | 8.767867 | 8.67937  | 8.471591 | 9.18591  | 8.589889 | 9.413007 | 9.789634 | 9.036547 | 9.304875 | 9.572342 | 9.045022 | 0.291    | -0.0402  | 0.0022   | 0.000419 | 2.16463  | 7  |
| 1213_at   | YJL170C | ASG7   | 3.76103  | 3.414075 | 4.28953  | 3.396108 | 3.491525 | 3.342612 | 3.369787 | 3.249088 | 3.254524 | 3.189522 | 3.464197 | 3.388493 | 3.385044 | 3.802967 | 3.524856 | 3.277086 | -0.0545  | 0.114    | 0.0196   | 0.00281  | 1.43769  | 13 |
| 1214_at   | YJL169W |        | 4.346919 | 4.197478 | 4.927414 | 3.903128 | 4.17783  | 3.997624 | 3.667627 | 3.601473 | 3.511176 | 3.248489 | 3.742771 | 3.390359 | 3.87259  | 4.211144 | 3.748173 | 3.557938 | -0.157   | 0.184    | 0.000646 | 0.00146  | 2.008495 | 14 |
| 1215_at   | YJL121C |        | 3.774608 | 3.359833 | 3.55786  | 3.313137 | 3.346647 | 3.303263 | 3.262577 | 3.291828 | 3.35341  | 3.360578 | 3.498277 | 3.244185 | 3.442943 | 3.443891 | 3.194512 | 3.300715 | -0.0397  | 0.0426   | 0.0899   | 0.010951 | 1.81523  | 13 |
| 1216_at   | YJL210W | PEX2   | 8.517063 | 8.287812 | 8.659304 | 9.046316 | 8.998747 | 8.818212 | 8.660745 | 8.601595 | 9.17994  | 9.341702 | 9.301357 | 10.35985 | 9.19031  | 8.906149 | 9.637976 | 9.410817 | 0.247    | -0.154   | 0.00573  | 0.000959 | 2.15881  | 9  |
| 1217_at   | YJL209W | CBP1   | 6.460006 | 6.376288 | 6.646633 | 6.289251 | 6.475879 | 6.345886 | 6.001729 | 6.295768 | 6.36881  | 6.679354 | 6.312783 | 6.295548 | 7.625339 | 6.529877 | 6.837148 | 6.334775 | 0.131    | 0.113    | 0.0107   | 0.001652 | 1.628788 | 16 |
| 1218_at   | YJL208C | NUC1   | 6.414825 | 6.462444 | 6.67919  | 6.663939 | 6.781656 | 6.872273 | 5.871655 | 6.170513 | 6.26158  | 6.072198 | 5.780628 | 5.907354 | 4.915285 | 4.271896 | 4.689674 | 6.111414 | -0.504   | -0.143   | 6.83E-07 | 6.37E-07 | 3.800917 | 16 |
| 1219_at   | YJL207C | LAA1   | 5.657501 | 5.472284 | 5.984269 | 5.706618 | 5.744084 | 5.549284 | 5.419038 | 5.399043 | 5.229176 | 5.606243 | 5.290885 | 5.900753 | 6.022492 | 5.211133 | 5.84707  | 5.510751 | 0.052939 | 0.0536   | 0.501    | 0.050982 | 1.411105 | 13 |
| 1220_at   | YJL206C |        | 5.259499 | 5.046384 | 5.778602 | 5.360972 | 5.403238 | 5.360653 | 5.488332 | 5.545664 | 5.395611 | 5.698269 | 5.544383 | 5.578783 | 5.692263 | 5.569409 | 5.547019 | 5.523748 | 0.0748   | -0.0132  | 0.129    | 0.010510 | 1.219213 | 13 |
| 1221_at   | YJL205C | NCE101 | 7.897791 | 7.874767 | 9.054423 | 9.655132 | 9.381748 | 9.728375 | 9.240642 | 9.29718  | 9.514032 | 9.545857 | 9.589562 | 10.21475 | 8.928756 | 8.677341 | 9.416922 | 9.76228  | 0.17     | -0.306   | 0.00117  | 0.000243 | 2.75292  | 10 |
| 1222_at   | YJL204C | RCY1   | 5.39254  | 5.389765 | 6.430748 | 6.071665 | 5.976539 | 5.911468 | 5.284194 | 5.506116 | 6.001401 | 5.387397 | 5.570385 | 8.38276  | 4.785674 | 5.161589 | 5.059766 | 5.612714 | -0.193   | -0.0631  | 0.0212   | 0.003016 | 1.665926 | 16 |
| 1223_at   | YJL203W | PRP21  | 5.21328  | 4.841973 | 5.21408  | 4.586247 | 4.827057 | 4.297264 | 4.502942 | 4.657882 | 4.496503 | 4.951764 | 4.620222 | 4.069803 | 4.19125  | 3.693358 | 3.90369  | 4.468533 | -0.294   | -0.00746 | 0.00144  | 0.000291 | 2.18169  | 16 |
| 1224_at   | YJL202C |        | 4.668105 | 4.729665 | 5.149185 | 4.184431 | 4.558007 | 4.30715  | 4.401829 | 4.006744 | 4.201529 | 4.203106 | 4.467066 | 4.251371 | 4.403883 | 4.438837 | 4.418817 | 4.204803 | -0.0928  | 0.116    | 0.00312  | 0.000564 | 1.537364 | 14 |
| 1225_at   | YJL201W | ECM25  | 5.794901 | 5.601095 | 6.350282 | 5.930142 | 6.219293 | 5.660247 | 5.400619 | 5.497757 | 5.633835 | 5.270137 | 6.038123 | 5.878192 | 6.250828 | 6.155949 | 5.718138 | 5.667143 | 0.0248   | 0.0839   | 0.273    | 0.029496 | 1.265508 | 13 |
| 1226_at   | YJL200C | ACO2   | 8.62559  | 8.538818 | 8.743328 | 7.91927  | 8.103683 | 7.413214 | 6.880878 | 6.443112 | 6.89148  | 6.167236 | 6.349703 | 6.785464 | 6.153718 | 6.226503 | 5.980193 | 6.636854 | -0.674   | 0.21     | 1.72E-06 | 1.26E-06 | 5.969044 | 18 |
| 1227_at   | YJL199C | MBB1   | 9.181411 | 9.243158 | 9.570692 | 9.473375 | 9.409222 | 9.27103  | 8.715259 | 8.558925 | 8.963391 | 8.630216 | 8.830216 | 8.201803 | 8.445185 | 8.699663 | 8.63173  | -0.291   | 0.081    | 0.00771  | 0.00124  | 2.167191 | 16       |    |
| 1228_at   | YJL198W | PHO90  | 9.128102 | 9.123092 | 8.949947 | 8.52124  | 8.57337  | 8.373033 | 8.509331 | 8.384871 | 8.093217 | 7.449939 | 7.233881 | 7.567906 | 7.518518 | 7.9626   | 7.558256 | 7.849985 | -0.411   | 0.148    | 7.85E-06 | 3.95E-06 | 2.975901 | 14 |
| 1229_at   | YJL197W | UBP12  | 5.538291 | 5.443518 | 6.473679 | 5.948225 | 5.947211 | 5.975774 | 6.130222 | 5.668354 | 5.713873 | 6.117315 | 6.034648 | 6.060899 | 6.508818 | 6.516278 | 6.404065 | 6.053372 | 0.189    | 0.0246   | 0.023    | 0.003235 | 1.659441 | 13 |
| 1230_at   | YJL196C | ELO1   | 11.08918 | 10.85128 | 10.55298 | 11.50847 | 11.33944 | 10.54864 | 11.27126 | 11.0074  | 11.18556 | 11.65544 | 11.2851  | 11.75214 | 10.79771 | 11.023   | 11.32433 | 11.37575 | 0.085    | -0.122   | 0.06     | 0.007638 | 1.593977 | 12 |
| 1231_at   | YJL195C |        | 4.11804  | 3.819173 | 4.474023 | 3.997729 | 3.934304 | 3.40141  | 3.881042 | 3.96027  | 3.864558 | 3.736406 | 3.771051 | 3.824743 | 4.069559 | 4.298448 | 3.682718 | 3.817372 | -0.0367  | 0.0713   | 0.099    | 0.011936 | 1.260429 | 13 |
| 1232_at   | YJL194W | CDC6   | 6.137965 | 5.875551 | 5.261245 | 5.910607 | 5.805952 | 5.450539 | 5.531529 | 5.464083 | 5.466283 | 5.495288 | 5.590617 | 7.110997 | 6.404095 | 5.878234 | 5.788096 | 5.554349 | 0.0662   | 0.0932   | 0.0614   | 0.007805 | 1.398062 | 13 |
| 1233_at   | YJL193W |        | 6.901056 | 6.95956  | 6.647987 | 6.673259 | 6.730205 | 6.586239 | 7.054164 | 6.761844 | 6.46174  | 7.206143 | 6.882324 | 7.156996 | 7.833614 | 7.965242 | 7.355988 | 6.897576 | 0.247    | 0.106    | 8.42E-05 | 2.64E-05 | 1.998596 | 16 |
| 1234_at   | YJL192C | SOP4   | 7.291481 | 7.49192  | 7.758985 | 7.491097 | 7.707647 | 8.662132 | 7.688402 | 7.748668 | 7.237513 | 7.498488 | 7.701993 | 7.139058 | 6.838653 | 7.939019 | 6.97145  | 7.790816 | -0.14    | -0.0232  | 0.0329   | 0.004459 | 1.448184 | 8  |
| 1235_at   | YJL191W | RPS14B | 9.713983 | 9.986287 | 10.07657 | 9.299196 | 9.274241 | 10.07873 | 9.572929 | 10.05622 | 9.617614 | 9.043963 | 9.423733 | 9.140231 | 8.656057 | 8.885147 | 8.948706 | 9.042291 | -0.291   | -0.00832 | 0.000668 | 0.00015  | 2.165368 | 16 |
| 1236_at   | YJL190C | RPS22A | 13.12982 | 13.16413 | 13.13752 | 12.70058 | 12.70582 | 11.68376 | 11.79191 | 11.20315 | 10.20315 | 10.462   |          |          |          |          |          |          |          |          |          |          |          |    |



|                        |          |          |          |          |          |          |          |          |          |           |          |          |          |          |          |          |         |          |          |          |          |    |
|------------------------|----------|----------|----------|----------|----------|----------|----------|----------|----------|-----------|----------|----------|----------|----------|----------|----------|---------|----------|----------|----------|----------|----|
| 11296_s_aYAR033W SST28 | 5.251453 | 5.302591 | 5.895104 | 5.478131 | 5.354148 | 5.439888 | 4.832119 | 4.930895 | 5.148721 | 5.088687  | 5.098147 | 4.835113 | 5.691161 | 4.968388 | 4.726525 | 5.05129  | 0.106   | 0.074    | 0.129    | 0.015106 | 1.419368 | 13 |
| 11297_at YAR035W YAT1  | 6.58974  | 6.367631 | 7.038672 | 6.667876 | 6.61593  | 6.780877 | 6.161872 | 6.08669  | 6.290052 | 6.547557  | 6.734516 | 6.797103 | 6.530509 | 6.826342 | 6.716661 | 6.500724 | 0.0222  | 0.0506   | 0.463    | 0.047527 | 1.166953 | 13 |
| 11298_at YAR042W SWH1  | 6.344313 | 5.782506 | 6.276365 | 5.688406 | 5.586094 | 5.86611  | 5.365377 | 5.702094 | 6.103343 | 5.022483  | 6.0091   | 5.450476 | 5.872378 | 5.560131 | 5.623413 | 5.558604 | -0.12   | 0.0956   | 0.0593   | 0.007556 | 1.528111 | 14 |
| 11300_at YAR047C       | 3.525283 | 3.10482  | 4.037636 | 3.044527 | 3.211925 | 3.265134 | 3.282771 | 3.022707 | 3.064592 | 3.004145  | 3.000814 | 3.201985 | 3.156368 | 3.129037 | 3.138659 | 3.070112 | -0.0965 | 0.0747   | 0.0428   | 0.006548 | 1.399449 | 14 |
| 11301_l_atYAR050W FLO1 | 4.808093 | 4.546817 | 5.446037 | 4.534396 | 5.115846 | 5.407966 | 4.962203 | 4.028647 | 4.601933 | 4.177036  | 4.665319 | 4.766049 | 4.766049 | 4.451538 | 3.817398 | 4.617464 | -0.164  | 0.0138   | 0.206    | 0.022936 | 1.549668 | 16 |
| 11302_at YAR053W       | 4.208351 | 3.81365  | 4.560118 | 4.124889 | 4.230419 | 4.206867 | 4.655976 | 4.383054 | 4.59808  | 4.026458  | 3.929238 | 4.423482 | 3.79644  | 4.051574 | 4.228755 | 4.282353 | -0.0286 | -0.0353  | 0.638    | 0.063377 | 1.134956 | 13 |
| 11303_s_aYAR060C       | 3.61046  | 3.434075 | 4.283666 | 3.427118 | 3.606106 | 3.459393 | 3.821675 | 3.436889 | 3.053913 | 3.458141  | 3.524085 | 3.308674 | 4.298436 | 5.106629 | 3.830743 | 3.422333 | 0.151   | 0.185    | 0.00741  | 0.0012   | 1.988248 | 8  |
| 11306_at YAR064W       | 5.79105  | 5.656846 | 5.862518 | 5.432779 | 5.208084 | 5.125796 | 5.196457 | 4.920875 | 5.217753 | 5.218401  | 5.368863 | 5.181442 | 4.900981 | 5.243573 | 4.590279 | 5.12062  | -0.191  | 0.057    | 0.00291  | 0.00053  | 1.658411 | 16 |
| 11307_s_aYAR066W       | 5.349515 | 4.943178 | 4.898309 | 4.988572 | 4.889122 | 4.965069 | 4.947319 | 4.745969 | 4.994173 | 5.038517  | 4.91852  | 4.581928 | 4.728937 | 4.79233  | 4.476231 | 4.86047  | -0.1    | 0.000782 | 0.0344   | 0.004649 | 1.304065 | 13 |
| 11308_s_aYAR068W       | 10.06855 | 10.12405 | 9.738642 | 9.250072 | 9.291551 | 9.2757   | 9.708275 | 7.789967 | 7.998371 | 7.575186  | 7.736432 | 7.484395 | 7.398349 | 8.102874 | 7.517932 | 7.85502  | -0.646  | 0.278    | 9.53E-06 | 4.58E-06 | 5.541175 | 18 |
| 11309_at YAR069C       | 7.038069 | 6.965109 | 6.878559 | 6.784906 | 6.79625  | 7.011548 | 6.828054 | 6.969482 | 6.981149 | 6.687015  | 6.884882 | 6.686128 | 6.767149 | 7.115189 | 6.727932 | 6.824091 | -0.0319 | 0.0252   | 0.308    | 0.032898 | 1.118944 | 13 |
| 11310_at YAL011W SWC3  | 5.176845 | 4.790794 | 5.427007 | 5.111352 | 5.150563 | 4.911615 | 5.103073 | 5.01376  | 5.134371 | 5.308664  | 5.156153 | 5.40757  | 5.109296 | 5.469805 | 5.101611 | 5.175373 | 0.0461  | -0.00133 | 0.514    | 0.052076 | 1.130091 | 13 |
| 11311_at YAL010C MDM10 | 4.581031 | 4.213316 | 4.965885 | 4.565236 | 4.58998  | 4.026239 | 4.12128  | 4.015672 | 4.325438 | 3.962325  | 4.131436 | 4.116717 | 3.463274 | 3.474943 | 3.494184 | 4.112555 | -0.282  | -0.0217  | 0.000153 | 4.35E-05 | 2.109597 | 16 |
| 11312_at YAL009W SPO7  | 7.234059 | 6.873222 | 7.417644 | 7.151544 | 7.325263 | 7.059313 | 6.955695 | 6.960186 | 7.036549 | 6.890234  | 6.906865 | 6.653803 | 6.342509 | 6.306322 | 5.967251 | 6.92468  | -0.256  | -0.0627  | 1.41E-05 | 6.17E-06 | 1.973544 | 16 |
| 11313_at YAL008W FUN14 | 6.696235 | 6.701794 | 7.121724 | 7.408548 | 7.632951 | 7.740531 | 7.927048 | 7.435391 | 7.472662 | 7.121242  | 7.417729 | 7.683593 | 6.713356 | 6.898326 | 6.92812  | 7.611189 | -0.0277 | -0.206   | 0.000553 | 0.000128 | 1.694912 | 12 |
| 11314_at YAL007C ERP2  | 7.405214 | 7.662698 | 8.347134 | 7.335274 | 7.418476 | 7.550832 | 6.197727 | 6.04439  | 6.362807 | 4.5327    | 5.277909 | 5.75987  | 7.07897  | 6.966506 | 6.366805 | 5.896933 | -0.395  | 0.406    | 0.00235  | 0.000443 | 5.045276 | 14 |
| 11315_l_atYAL005C SSA1 | 12.13612 | 12.20373 | 12.01229 | 12.84143 | 12.73667 | 12.02672 | 13.14143 | 12.87873 | 12.75131 | 12.50043  | 12.6009  | 12.84153 | 13.89393 | 13.90122 | 13.72423 | 12.85664 | 0.39    | 0.0387   | 0.000093 | 2.88E-05 | 2.813254 | 7  |
| 11316_r_atYAL005C SSA1 | 12.52939 | 12.46144 | 12.33828 | 13.2319  | 13.16365 | 12.89715 | 13.69306 | 13.30315 | 13.01368 | 13.25681  | 13.07629 | 13.25641 | 14.14709 | 14.14329 | 14.14851 | 13.34695 | 0.395   | -0.0096  | 3.76E-05 | 1.36E-05 | 2.848517 | 7  |
| 11317_s_aYAL005C SSA1  | 9.848509 | 10.06751 | 10.07328 | 9.633542 | 9.437689 | 9.674445 | 10.03577 | 9.763139 | 10.02126 | 9.529065  | 9.30226  | 10.26402 | 11.5614  | 11.46605 | 11.5318  | 9.747884 | 0.367   | 0.277    | 7.73E-06 | 3.90E-06 | 3.656087 | 8  |
| 11318_at YAL004W       | 4.20613  | 4.085881 | 4.60989  | 3.562194 | 3.929248 | 3.871425 | 4.069323 | 3.949815 | 3.949942 | 3.879622  | 4.102465 | 3.592503 | 5.048216 | 5.098966 | 4.726304 | 3.84479  | 0.164   | 0.213    | 3.68E-05 | 1.34E-05 | 2.168289 | 8  |
| 11319_at YAL003W EFB1  | 10.76787 | 10.7279  | 10.65954 | 10.07819 | 10.05099 | 10.3452  | 9.569522 | 9.843467 | 9.790759 | 8.614043  | 8.20113  | 9.32794  | 9.241828 | 9.761608 | 9.649091 | 9.356401 | -0.369  | 0.227    | 7.88E-05 | 2.51E-05 | 3.137415 | 14 |
| 11320_at YAL003W EFB1  | 11.59722 | 11.77017 | 12.0076  | 11.47954 | 11.44509 | 11.69933 | 10.54604 | 10.87737 | 10.73976 | 9.959159  | 9.973128 | 10.32393 | 10.20678 | 11.05591 | 10.76172 | 10.52575 | -0.366  | 0.206    | 0.000646 | 0.000146 | 2.968351 | 14 |
| 11321_at YAL002W VP58  | 5.546442 | 5.747494 | 5.53112  | 5.968551 | 5.928501 | 5.915915 | 6.229718 | 6.035386 | 6.094461 | 6.42331   | 6.241224 | 6.131774 | 7.248499 | 7.08675  | 6.659353 | 6.227601 | 0.347   | 0.022    | 9.89E-07 | 8.44E-07 | 2.508813 | 7  |
| 11322_at YAL001C TFC3  | 6.418749 | 6.572291 | 6.434355 | 6.66497  | 6.658907 | 6.502875 | 6.221381 | 6.382415 | 6.728265 | 6.7665746 | 6.930375 | 7.062497 | 7.7178   | 7.746297 | 7.21081  | 7.110192 | 0.294   | -0.0297  | 0.000949 | 0.000204 | 2.180039 | 7  |
| 11323_at YAL001C TFC3  | 3.925111 | 3.597127 | 3.137096 | 3.09399  | 3.019205 | 3.311029 | 2.90762  | 3.677863 | 3.900813 | 3.088986  | 3.843822 | 2.955811 | 4.33338  | 4.098224 | 3.732769 | 3.308471 | 0.128   | 0.133    | 0.0498   | 0.006458 | 1.693234 | 13 |
| 11324_at YAR002W NUP60 | 6.675478 | 7.003553 | 6.850595 | 6.770245 | 6.826692 | 6.829002 | 6.677615 | 6.843544 | 6.502128 | 6.619232  | 6.654595 | 6.528669 | 6.530282 | 7.043637 | 6.55962  | 6.56836  | -0.0755 | 0.0695   | 0.0484   | 0.006302 | 1.335852 | 13 |
| 11325_at YAR002C- ERP1 | 9.116257 | 9.424851 | 9.914715 | 9.431504 | 9.371122 | 9.29293  | 9.082114 | 9.101457 | 9.040622 | 8.535645  | 8.504746 | 9.020203 | 7.54993  | 8.077036 | 8.237408 | 8.97405  | -0.379  | -0.0341  | 0.000096 | 0.000206 | 2.731428 | 16 |
| 11326_at YAR003W SWD1  | 7.519917 | 6.888396 | 6.340002 | 6.599258 | 6.788792 | 6.242354 | 7.048829 | 7.097911 | 6.92189  | 7.481316  | 7.022637 | 6.877739 | 6.484055 | 6.529555 | 6.423291 | 6.931804 | -0.0602 | -0.0734  | 0.366    | 0.038405 | 1.3136   | 13 |
| 11327_at YAR007C RFA1  | 7.880981 | 8.26477  | 8.619456 | 8.291739 | 8.288976 | 8.169608 | 8.256212 | 8.066705 | 7.814399 | 8.462465  | 8.12389  | 8.334992 | 8.846612 | 9.147559 | 8.827698 | 8.156254 | 0.179   | 0.124    | 0.000672 | 0.000151 | 1.816225 | 7  |
| 11328_at YAR008W SEN34 | 5.968682 | 5.741814 | 5.79422  | 5.741785 | 5.74277  | 5.416677 | 5.596339 | 5.660482 | 5.465241 | 6.147417  | 5.307023 | 4.992683 | 5.642494 | 5.857228 | 5.390697 | 5.527096 | -0.0618 | 0.0565   | 0.338    | 0.005781 | 1.262042 | 13 |
| 11329_at YAR014C BUD14 | 7.14729  | 7.100912 | 6.930766 | 6.865777 | 7.007109 | 6.515795 | 6.299427 | 6.932322 | 6.543609 | 6.630748  | 6.446681 | 6.445416 | 6.079948 | 6.456186 | 6.379868 | 6.582477 | -0.198  | 0.0275   | 0.00028  | 7.18E-05 | 1.689229 | 16 |
| 11330_at YAR015W ADE1  | 8.924839 | 9.408206 | 9.961777 | 9.080714 | 8.77381  | 9.188792 | 9.391792 | 9.600345 | 8.046312 | 6.885226  | 6.762687 | 7.320219 | 7.174735 | 7.554239 | 7.787826 | 7.512447 | -0.591  | 0.279    | 0.000238 | 6.28E-05 | 5.074888 | 18 |
| 11331_at YAR018C KIN3  | 4.744318 | 4.932156 | 4.786637 | 4.32618  | 4.575195 | 4.206995 | 3.664954 | 3.981688 | 3.831526 | 3.664291  | 3.888319 | 3.523414 | 3.68237  | 4.122332 | 3.537079 | 3.783776 | -0.284  | 0.146    | 5.17E-05 | 1.78E-05 | 2.243967 | 14 |
| 11332_at YAR019C CDC15 | 5.620903 | 5.818101 | 5.778939 | 5.742239 | 5.802335 | 5.86039  | 5.574525 | 5.656688 | 5.589492 | 5.791172  | 5.996427 | 6.023361 | 7.191947 | 6.815017 | 6.744678 | 5.819781 | 0.142   | 0.174    | 0.74E-07 | 2.46E-07 | 2.363603 | 8  |
| 11333_at YAL033W POP5  | 8.057333 | 7.971653 | 8.239523 | 8.004658 | 8.103235 | 8.286596 | 7.867369 | 8.123108 | 7.82364  | 7.603231  | 7.406025 | 7.035413 | 6.572456 | 7.034317 | 6.42143  | 7.685399 | -0.4    | -0.0786  | 4.89E-06 | 2.76E-06 | 2.889990 | 16 |
| 11334_at YAL032C PRP45 | 4.702831 | 4.469104 | 4.411974 | 4.758825 | 4.655854 | 4.889908 | 4.896954 | 5.135932 | 4.993947 | 5.053338  | 4.647684 | 4.48957  | 4.63864  | 5.109968 | 4.613479 | 4.877437 | 0.0467  | -0.0593  | 0.227    | 0.024996 | 1.244251 | 13 |
| 11335_at YAL031C GIP4  | 6.957437 | 7.040644 | 6.817441 | 7.161627 | 7.101418 | 7.284932 | 7.393205 | 7.512472 | 7.455635 | 7.472566  | 7.315675 | 7.381375 | 6.732503 | 7.116008 | 7.158517 | 7.419779 | 0.019   | -0.124   | 0.000343 | 8.52E-05 | 1.392891 | 12 |
| 11336_at YAL030W SNC1  | 6.902665 | 6.809294 | 7.105166 | 7.517604 | 7.239967 | 8.003822 | 7.209634 | 7.611634 | 7.83569  | 6.445487  | 7.442843 | 8.349799 | 6.651734 | 7.309114 | 7.014646 | 7.577446 | -0.0124 | -0.164   | 0.145    | 0.016725 | 1.504897 | 12 |
| 11337_at YAL030W SNC1  | 8.6125   | 8.760431 | 9.340892 | 9.550277 | 9.2642   | 9.605421 | 9.160627 | 9.315836 | 9.214178 | 9.209081  | 9.494579 | 10.2421  | 9.999964 | 9.77828  | 9.416301 | 9.545674 | 0.13    | -0.105   | 0.0818   | 0.010052 | 1.590033 | 13 |
| 11338_at YAL029C MYO4  | 8.672475 | 8.242504 | 8.591392 | 8.269035 | 8.35051  | 8.130124 | 7.937493 | 8.159695 | 7.950596 | 7.536685  | 7.567018 | 7.889669 | 7.184389 | 6.872952 | 7.484381 | 7.82079  | -0.319  | 0.0795   | 6.74E-06 | 3.15E-06 | 3.232406 | 16 |
| 11339_at YAL028W FR2   | 5.154146 | 5.202702 | 5.261162 | 5.319563 | 5.209839 | 5.742428 | 5.307166 | 5.549638 | 5.42452  | 5.542996  | 5.632874 | 5.840906 | 6.208069 | 7.166749 | 6.451347 | 5.950549 | 0.351   | 0.0888   | 3.17E-05 | 1.91E-05 | 2.538482 | 8  |
| 11340_at YAL027W       | 6.202897 | 6.04142  | 5.774727 | 5.950904 | 6.02887  | 5.512884 | 5.993253 | 6.188954 | 5.997407 | 6.035665  | 5.75916  | 5.296055 | 5.576661 | 5.722101 | 5.353395 | 5.829865 |         |          |          |          |          |    |

|           |              |       |          |          |          |          |          |          |          |          |          |          |          |          |          |          |          |          |          |          |          |          |          |    |
|-----------|--------------|-------|----------|----------|----------|----------|----------|----------|----------|----------|----------|----------|----------|----------|----------|----------|----------|----------|----------|----------|----------|----------|----------|----|
| 11371_at  | YAL037W      | CDC19 | 12.45521 | 12.48804 | 12.48715 | 12.4557  | 12.45649 | 12.57993 | 12.3843  | 12.33934 | 12.61837 | 12.07843 | 12.38644 | 12.79904 | 12.65302 | 12.69621 | 12.8175  | 12.45166 | 0.0526   | 0.0421   | 0.122    | 0.01436  | 1.206389 | 13 |
| 11372_at  | YAL037W      |       | 6.148978 | 5.499085 | 5.882333 | 6.677622 | 6.797788 | 6.314902 | 6.622135 | 6.535463 | 6.855207 | 6.249543 | 5.886074 | 6.246136 | 6.880795 | 8.013001 | 7.823807 | 6.554876 | 0.511    | 0.146    | 0.000949 | 0.000204 | 3.87966  | 7  |
| 11373_at  | YAL036C      | RBG1  | 8.744224 | 8.889013 | 8.806560 | 8.368327 | 8.656684 | 8.365377 | 8.726588 | 8.611865 | 8.192879 | 8.368104 | 8.100854 | 7.433217 | 7.240437 | 7.445736 | 7.336743 | 8.188137 | -0.39    | -0.0311  | 0.000018 | 7.52E-06 | 2.810166 | 16 |
| 11374_at  | YAL035W      | FUN12 | 9.512981 | 9.522445 | 9.451139 | 9.347586 | 9.316341 | 9.092677 | 9.008597 | 9.119405 | 8.704009 | 8.696633 | 8.616426 | 8.827682 | 8.955188 | 8.498153 | 8.78381  | -0.223   | 0.0987   | 0.000207 | 5.58E-05 | 1.812781 | 16       |    |
| 11375_at  | YAL034C-B    |       | 3.230651 | 3.413061 | 3.807184 | 3.102181 | 2.936455 | 3.030091 | 2.982203 | 2.953392 | 3.158721 | 3.358536 | 3.085689 | 2.907763 | 5.13386  | 4.941417 | 4.712063 | 3.039087 | 0.358    | 0.321    | 4.17E-08 | 9.75E-08 | 3.886521 | 8  |
| 11376_at  | YAL034W-MTW1 |       | 5.112851 | 5.146056 | 5.543897 | 4.902634 | 5.036101 | 4.948328 | 4.654324 | 4.719491 | 4.452512 | 4.853545 | 4.704591 | 4.438432 | 4.613675 | 5.18616  | 4.667078 | 4.667138 | -0.128   | 0.0956   | 0.0129   | 0.001938 | 1.548946 | 14 |
| 11377_at  | YAL034C      | FUN19 | 8.173692 | 7.657964 | 7.396421 | 8.762243 | 8.416994 | 8.676053 | 9.113242 | 9.469397 | 9.267944 | 9.472825 | 9.68301  | 9.978224 | 9.196699 | 9.965578 | 9.59571  | 9.504535 | 0.501    | -0.235   | 4.12E-06 | 2.42E-06 | 3.950103 | 10 |
| 11379_at  | YAL067C      | SEO1  | 5.109425 | 4.598326 | 4.719889 | 5.251151 | 5.528314 | 5.127965 | 5.844234 | 5.861274 | 5.61773  | 6.046846 | 5.861181 | 6.106902 | 5.572871 | 5.556444 | 5.217955 | 5.869862 | 0.192    | -0.208   | 6.69E-05 | 2.20E-05 | 2.251634 | 9  |
| 11380_at  | YAL066W      |       | 5.142868 | 4.820027 | 5.211302 | 5.644469 | 5.475207 | 5.289521 | 5.931874 | 5.855223 | 5.703845 | 6.638687 | 6.585434 | 6.532597 | 6.097228 | 6.645161 | 5.551113 | 6.177271 | 0.329    | -0.171   | 0.000486 | 0.000115 | 2.57168  | 9  |
| 11381_at  | YAL065C      |       | 5.889506 | 5.521506 | 5.452625 | 5.864619 | 5.598609 | 5.183297 | 6.637765 | 7.258032 | 6.258351 | 5.898511 | 6.281515 | 6.045868 | 5.267494 | 6.143669 | 5.41466  | 6.21882  | 0.0089   | -0.175   | 0.159    | 0.018149 | 1.547375 | 12 |
| 11382_at  | YAL064W-B    |       | 4.306074 | 4.2518   | 3.765704 | 3.984414 | 3.982703 | 4.220676 | 4.224978 | 4.123423 | 4.535991 | 4.368016 | 4.306879 | 3.682201 | 4.157791 | 4.253684 | 3.969921 | 4.169623 | 0.00287  | -0.0157  | 0.926    | 0.088742 | 1.03439  | 13 |
| 11383_at  | YAL064C-A    |       | 3.326579 | 3.20959  | 2.814364 | 2.928685 | 2.97123  | 3.177836 | 3.059385 | 3.178627 | 3.806885 | 3.043815 | 3.347731 | 2.893405 | 3.384548 | 3.067571 | 3.021044 | 3.168625 | 0.00723  | -0.0106  | 0.965    | 0.092157 | 1.037874 | 13 |
| 11384_at  | YAL064W      |       | 3.08547  | 3.035936 | 2.997809 | 3.043713 | 3.008912 | 3.25211  | 2.997616 | 3.300606 | 3.578089 | 3.081718 | 3.300592 | 2.979396 | 3.126196 | 2.810295 | 2.878779 | 3.188095 | -0.0293  | -0.0554  | 0.134    | 0.015646 | 1.194658 | 13 |
| 11385_s_a | YAL063C      | FLO9  | 5.747343 | 5.657348 | 5.592994 | 5.844343 | 5.715891 | 6.186402 | 6.129463 | 6.432726 | 6.035155 | 5.833242 | 5.999394 | 6.156555 | 5.927177 | 6.391337 | 5.92458  | 6.098413 | 0.0929   | -0.0615  | 0.066    | 0.008332 | 1.34736  | 13 |
| 11386_at  | YAL062W      | GDH3  | 6.225587 | 6.310038 | 6.897335 | 7.549035 | 7.482507 | 7.996691 | 7.642505 | 8.174749 | 8.003503 | 7.44594  | 8.046574 | 8.089684 | 7.811417 | 8.548168 | 8.349914 | 8.04208  | 0.406    | -0.182   | 0.00026  | 6.77E-05 | 2.985631 | 9  |
| 11387_at  | YAL061W      | BDH2  | 5.033469 | 4.584201 | 3.715502 | 6.94613  | 6.473047 | 6.688518 | 8.00757  | 8.753814 | 8.662406 | 7.421609 | 7.322946 | 7.89186  | 7.647366 | 6.97752  | 7.14661  | 8.087414 | 0.651    | -0.612   | 0.000134 | 3.87E-05 | 12.53494 | 10 |
| 11388_at  | YAL060W      | BDH1  | 8.312038 | 8.710487 | 8.976739 | 10.31031 | 10.31938 | 10.1344  | 9.749985 | 10.05287 | 10.04723 | 9.905272 | 9.153231 | 9.704533 | 9.658386 | 9.98312  | 9.719767 | 9.93901  | 0.166    | -0.178   | 0.092    | 0.011169 | 2.005762 | 9  |
| 11389_at  | YAL059W      | ECM1  | 7.903553 | 7.835658 | 7.857942 | 7.126106 | 7.253648 | 7.144403 | 6.321598 | 6.936451 | 6.731081 | 6.743243 | 6.838328 | 5.925206 | 7.029208 | 7.296593 | 6.611615 | 6.508674 | -0.257   | 0.255    | 8.55E-05 | 2.68E-05 | 2.803912 | 14 |
| 11390_at  | YAL058W      | CNE1  | 5.71708  | 5.496777 | 5.64511  | 5.699029 | 5.698538 | 5.822061 | 5.576257 | 5.64026  | 5.737785 | 5.495937 | 5.493562 | 5.413745 | 6.289278 | 6.045556 | 5.755101 | 5.612478 | 0.0707   | 0.0627   | 0.0469   | 0.00612  | 1.305398 | 13 |
| 11392_at  | YAL056W      | GPB2  | 5.016486 | 4.668827 | 4.516106 | 5.10218  | 5.146387 | 4.881114 | 5.510782 | 5.589722 | 5.474231 | 5.785946 | 5.353899 | 5.469183 | 6.252558 | 5.770933 | 6.507427 | 5.507301 | 0.295    | -0.0575  | 0.000218 | 5.82E-05 | 2.188616 | 9  |
| 11393_at  | YAL055W      | PFX22 | 5.619677 | 5.636493 | 5.773732 | 5.930199 | 5.693389 | 5.849689 | 5.561233 | 5.899245 | 5.792832 | 6.08776  | 5.960053 | 5.910434 | 7.318365 | 7.259823 | 6.929412 | 5.914934 | 0.368    | 0.142    | 5.5E-08  | 1.15E-07 | 2.713573 | 8  |
| 3148_s_at | YCR096C      | HMRA2 | 8.591934 | 8.54257  | 8.858011 | 8.871368 | 8.779474 | 8.330099 | 8.198395 | 8.848631 | 8.540172 | 8.812108 | 8.983992 | 9.633001 | 10.3738  | 9.778211 | 10.07635 | 8.853418 | 0.382    | 0.141    | 0.000043 | 1.52E-05 | 2.788038 | 8  |
| 3182_i_at | YHR217C      |       | 6.569095 | 6.452214 | 6.213743 | 6.749426 | 6.465876 | 6.999531 | 5.246344 | 6.020341 | 6.517093 | 5.836994 | 6.263552 | 5.448867 | 6.321364 | 5.788717 | 6.151981 | 6.067399 | -0.137   | 0.061    | 0.306    | 0.032696 | 1.442427 | 16 |
| 3183_f_at | YIL177C      |       | 9.44729  | 9.407386 | 9.526837 | 9.683461 | 9.616221 | 10.03857 | 9.410828 | 9.369779 | 10.05859 | 9.818844 | 9.481703 | 10.47138 | 10.7145  | 10.32527 | 10.91286 | 9.883998 | 0.304    | 0.0496   | 0.00293  | 0.000532 | 2.236011 | 7  |
| 3184_s_at | YIL177C      |       | 2.770315 | 2.527205 | 2.450701 | 2.588574 | 2.537921 | 2.725474 | 2.380069 | 2.497463 | 2.869106 | 2.625382 | 2.671052 | 2.536259 | 3.145549 | 2.579197 | 3.024371 | 2.611584 | 0.0786   | 0.0392   | 0.0649   | 0.008193 | 1.259438 | 13 |
| 3187_s_at | YHL050C      |       | 5.434477 | 4.283327 | 3.194966 | 4.299439 | 3.484943 | 3.620047 | 4.660784 | 4.648472 | 4.690504 | 3.754424 | 6.279095 | 4.27422  | 6.893922 | 5.95106  | 6.32038  | 4.996015 | 0.456    | 0.0439   | 0.184    | 0.020786 | 3.353769 | 7  |
| 3188_at   | YHL048W      | COS8  | 8.759925 | 8.48007  | 7.864427 | 8.289623 | 8.439219 | 8.608255 | 8.645871 | 8.654803 | 8.06613  | 8.645883 | 8.801774 | 8.759167 | 8.466631 | 8.860897 | 8.754481 | 8.688749 | 0.0941   | -0.0456  | 0.119    | 0.014101 | 1.292625 | 13 |
| 3189_i_at | YHL048W      | COS8  | 9.360661 | 9.760608 | 9.89455  | 9.765985 | 9.938977 | 10.10338 | 10.00798 | 9.586485 | 9.897193 | 9.916461 | 9.910321 | 9.935871 | 9.108445 | 9.880919 | 10.1218  | 9.897851 | 0.00427  | -0.0615  | 0.416    | 0.047277 | 1.168471 | 13 |
| 3190_f_at | YHL048W      | COS8  | 6.637551 | 6.857158 | 6.820121 | 6.633776 | 6.258972 | 6.97745  | 6.870741 | 6.527923 | 6.698082 | 6.634929 | 6.708593 | 7.162034 | 6.663563 | 7.260925 | 7.028622 | 6.767172 | 0.0605   | 0.0302   | 0.243    | 0.026566 | 1.194373 | 10 |
| 3193_at   | YHL045W      |       | 6.302446 | 6.387857 | 7.11149  | 7.383378 | 7.338907 | 6.938987 | 6.503154 | 5.888203 | 5.835852 | 5.711424 | 6.248665 | 5.511987 | 6.737994 | 6.511564 | 6.040477 | 6.054801 | -0.125   | 0.146    | 0.334    | 0.035339 | 1.741591 | 14 |
| 3234_at   | YGR295C      | COS6  | 3.090197 | 3.383353 | 2.900871 | 3.22162  | 3.428206 | 3.198496 | 2.749513 | 3.187131 | 2.951098 | 2.783064 | 3.446751 | 2.689033 | 3.619715 | 3.646137 | 3.077199 | 3.04853  | 0.0562   | 0.0704   | 0.223    | 0.024651 | 1.295377 | 13 |
| 3299_f_at | YGL260W      |       | 4.345422 | 4.137057 | 3.600245 | 3.777176 | 4.0109   | 4.08669  | 3.915183 | 3.894964 | 4.127091 | 3.760578 | 3.834318 | 3.908958 | 3.822481 | 3.559291 | 4.02193  | 3.897817 | -0.0644  | 0.00477  | 0.329    | 0.034892 | 1.186056 | 13 |
| 3325_f_at | YER188c-a    |       | 5.496325 | 5.272525 | 5.012759 | 5.388434 | 5.321819 | 5.837297 | 4.643046 | 4.933293 | 5.505143 | 4.629903 | 4.821361 | 4.98671  | 5.405046 | 5.50179  | 5.285513 | 5.118759 | -0.00581 | 0.0654   | 0.522    | 0.052803 | 1.182468 | 13 |
| 3326_at   | YFL063W      |       | 2.904546 | 2.752411 | 2.731203 | 2.932133 | 2.734307 | 2.597127 | 2.756024 | 2.570554 | 3.135516 | 2.717653 | 2.781403 | 2.842765 | 2.852925 | 2.323616 | 2.833853 | 2.828661 | 0.0332   | 0.0173   | 0.514    | 0.052045 | 1.103886 | 13 |
| 3327_f_at | YFL062W      | COS4  | 10.18568 | 10.43964 | 10.59621 | 10.62778 | 10.66238 | 11.05857 | 10.89131 | 11.04081 | 10.98002 | 10.78608 | 11.10179 | 11.47769 | 10.50153 | 11.38456 | 11.39691 | 11.0659  | 0.182    | -0.0871  | 0.0141   | 0.002096 | 1.653416 | 9  |
| 3356_f_at | YDR543C      |       | 5.315847 | 5.305379 | 5.120203 | 5.594383 | 5.454994 | 5.872408 | 4.700638 | 4.925251 | 5.572014 | 4.997675 | 5.346016 | 5.226161 | 5.337792 | 5.342101 | 5.272378 | 5.271193 | -0.0121  | 0.0106   | 0.963    | 0.091958 | 1.04623  | 13 |
| 3357_at   | YDR544C      |       | 3.135977 | 3.345876 | 3.117547 | 3.44308  | 3.135395 | 3.363611 | 2.596947 | 2.644954 | 3.094132 | 2.84581  | 3.023976 | 2.767447 | 3.147652 | 2.772822 | 3.006898 | 2.913424 | -0.008   | 0.0536   | 0.18     | 0.020367 | 1.295051 | 13 |
| 3403_f_at | YDR542W      | PAU10 | 11.57676 | 11.68743 | 12.15371 | 11.67003 | 11.66024 | 11.90955 | 10.84093 | 11.20077 | 11.65761 | 10.76237 | 11.55836 | 11.94637 | 11.28344 | 11.45497 | 11.901   | 11.39426 | -0.0737  | 0.0811   | 0.346    | 0.036487 | 1.369937 | 13 |
| 3453_at   | YCR007C      |       | 5.371894 | 5.219482 | 4.691175 | 4.880726 | 5.123538 | 5.131223 | 5.136673 | 5.411619 | 5.331161 | 5.537855 | 5.831573 | 6.005254 | 5.733643 | 5.298641 | 6.073464 | 5.478969 | 0.204    | -0.0284  | 0.0189   | 0.002725 | 1.718989 | 9  |
| 3470_i_at | YDL248W      | COS7  | 3.756132 | 3.360425 | 2.469834 | 3.04613  | 3.298545 | 3.231683 | 4.67169  | 4.42064  | 5.373441 | 3.907965 | 3.702471 | 4.223122 | 3.332598 | 3.411382 | 3.810192 | 4.151622 | 0.0718   | -0.242   | 0.119    | 0.01403  | 2.01571  | 12 |
| 3471_f_at | YDL248W      | COS7  | 8.542387 | 8.515256 | 7.972317 | 8.62221  | 8.724265 | 8.756333 | 9.100788 | 9.200424 | 9.406692 | 8.749562 | 9.098669 | 9.065829 | 8.4297   |          |          |          |          |          |          |          |          |    |

|           |              |          |          |            |          |          |          |          |          |          |          |          |          |          |          |          |          |          |          |          |          |          |    |
|-----------|--------------|----------|----------|------------|----------|----------|----------|----------|----------|----------|----------|----------|----------|----------|----------|----------|----------|----------|----------|----------|----------|----------|----|
| 3853_f_at | YJR162C      | 5.005692 | 5.136205 | 4.901268   | 5.235353 | 4.948628 | 5.32929  | 4.276386 | 4.878952 | 5.093767 | 4.369878 | 4.998405 | 5.083554 | 5.507361 | 5.503778 | 5.574466 | 4.882313 | 0.101    | 0.113    | 0.0396   | 0.005265 | 1.543551 | 13 |
| 3854_f_at | YKL225W      | 3.57568  | 3.453497 | 3.218575   | 3.6425   | 3.613704 | 4.133971 | 3.92827  | 3.163261 | 3.733395 | 3.183805 | 3.644629 | 3.184472 | 3.508065 | 3.656822 | 3.636589 | 3.466848 | 0.106    | 0.0189   | 0.91     | 0.087255 | 1.063649 | 13 |
| 3855_s_at | YKL223W      | 2.673538 | 2.658385 | 2.523653   | 2.642746 | 2.711775 | 2.657898 | 2.668356 | 2.53816  | 2.808014 | 2.737111 | 2.678589 | 2.283048 | 2.628738 | 2.662467 | 2.591158 | 2.645663 | -0.00547 | -0.00533 | 0.917    | 0.087905 | 1.021951 | 13 |
| 3907_f_at | YAL068C PAU8 | 11.98375 | 12.09641 | 12.34863   | 12.16694 | 12.16897 | 12.16112 | 11.59332 | 11.61807 | 11.94472 | 11.52585 | 11.96597 | 12.34591 | 11.77486 | 11.82353 | 12.14571 | 11.89614 | -0.0602  | 0.0394   | 0.403    | 0.041934 | 1.212001 | 13 |
| 3938_at   | YBL069W AS1T | 5.384836 | 5.672472 | 5.132795   | 5.193982 | 5.126734 | 5.051844 | 5.070609 | 5.47695  | 5.281264 | 5.536996 | 5.638453 | 5.444191 | 6.865595 | 6.431415 | 6.579669 | 5.357832 | 0.328    | 0.177    | 3.26E-07 | 3.76E-07 | 2.689094 | 8  |
| 3939_at   | YBR006W UGA2 | 6.000856 | 6.637831 | 6.323293   | 7.63724  | 7.966501 | 8.04116  | 8.59073  | 7.967328 | 8.921233 | 7.426753 | 7.435898 | 8.370765 | 8.217169 | 7.524813 | 7.942897 | 8.213308 | 0.318    | -0.292   | 0.00558  | 0.000937 | 3.877853 | 10 |
| 3940_at   | YBR201W DER1 | 4.732297 | 4.764332 | 3.859139   | 4.625657 | 4.935104 | 4.761008 | 5.098828 | 5.036358 | 4.790399 | 4.315489 | 4.416198 | 4.595662 | 3.682466 | 3.528672 | 3.979826 | 4.728018 | -0.212   | -0.173   | 0.000492 | 0.000117 | 2.149178 | 15 |
| 3941_at   | YCL024W KCC4 | 4.368953 | 4.341456 | 4.150995   | 4.486551 | 4.565704 | 4.664734 | 4.356947 | 4.331348 | 4.274622 | 4.428274 | 4.597796 | 4.444212 | 6.013562 | 5.679821 | 5.374767 | 4.502788 | 0.328    | 0.139    | 6.42E-06 | 3.39E-06 | 2.49757  | 8  |
| 3942_at   | YFL031W HAC1 | 8.728148 | 8.186238 | 6.490167   | 8.280744 | 7.776705 | 8.41664  | 8.869753 | 9.54259  | 9.021735 | 8.590394 | 9.960421 | 9.75452  | 10.49405 | 10.30763 | 10.81079 | 9.201262 | 0.727    | -0.0156  | 0.000524 | 0.00123  | 6.873851 | 6  |
| 3943_i_at | YFL031W HAC1 | 9.929473 | 9.701086 | 8.869674   | 9.680104 | 9.70213  | 10.22632 | 10.31876 | 10.41697 | 10.03196 | 10.27768 | 10.88338 | 10.8259  | 10.86698 | 10.91167 | 11.30762 | 10.44518 | 0.414    | -0.0517  | 0.000159 | 4.48E-05 | 2.995987 | 7  |
| 3944_f_at | YFL031W HAC1 | 7.99136  | 8.043351 | 7.239329   | 8.118275 | 8.101891 | 8.712993 | 9.096973 | 8.556475 | 8.265883 | 8.922631 | 9.597037 | 9.578768 | 9.525259 | 8.992774 | 10.02923 | 9.010806 | 0.493    | -0.107   | 0.000218 | 5.83E-05 | 3.692733 | 7  |
| 3945_at   | YGR029W ERV1 | 7.375703 | 7.148638 | 7.567054   | 6.32314  | 6.49626  | 6.574444 | 6.917033 | 6.897777 | 6.930868 | 5.841065 | 5.674137 | 6.310307 | 5.151801 | 5.912229 | 5.486537 | 6.249347 | -0.542   | 0.0142   | 3.44E-06 | 2.12E-06 | 4.206424 | 18 |
| 3946_at   | YGR029W ERV1 | 8.332508 | 8.375224 | 8.229646   | 7.319916 | 7.536637 | 7.595433 | 8.11987  | 7.949275 | 7.866627 | 7.66412  | 7.428624 | 7.182507 | 6.012729 | 5.820307 | 5.88138  | 7.495609 | -0.579   | -0.116   | 1.21E-06 | 9.77E-07 | 4.635457 | 18 |
| 3947_at   | YKL033W-A    | 9.271853 | 9.129499 | 9.108564   | 8.712402 | 8.815723 | 8.847401 | 9.271765 | 8.903914 | 8.748655 | 8.907985 | 8.844666 | 8.661802 | 7.646041 | 7.600526 | 7.866131 | 8.791638 | -0.346   | -0.103   | 0.000004 | 2.36E-06 | 2.503017 | 15 |
| 3948_s_at | YKL198C PTK1 | 5.354853 | 4.680982 | 3.38959    | 4.246053 | 4.422603 | 4.474821 | 5.310174 | 5.979987 | 5.567247 | 5.401637 | 5.860404 | 4.655309 | 6.94115  | 6.58759  | 7.271771 | 5.294595 | 0.555    | 0.0622   | 0.00735  | 0.001193 | 4.359632 | 7  |
| 3949_i_at | YNL044W YIP3 | 7.346282 | 7.568197 | 7.180581   | 7.240543 | 7.392051 | 7.083615 | 7.044218 | 7.24432  | 7.169525 | 8.0379   | 8.22656  | 7.997472 | 7.526836 | 7.655086 | 8.362535 | 7.519255 | 0.184    | 0.0187   | 0.0432   | 0.005701 | 1.627096 | 13 |
| 3950_at   | YNL180C RH05 | 5.781963 | 5.996772 | 5.694538   | 6.349154 | 6.263702 | 6.149139 | 6.937548 | 6.815276 | 6.886196 | 6.768945 | 6.323803 | 6.900581 | 5.7908   | 5.267706 | 5.166212 | 6.723354 | -0.0526  | -0.288   | 5.43E-05 | 1.85E-05 | 2.119986 | 12 |
| 4034_at   | YI020W-A     | 4.038544 | 3.667198 | 3.331481   | 3.730262 | 3.854321 | 3.876338 | 3.441813 | 3.70737  | 3.881066 | 3.602582 | 3.587343 | 3.24884  | 3.493516 | 3.704876 | 3.571767 | 3.629265 | -0.0496  | 0.00525  | 0.552    | 0.055592 | 1.140395 | 13 |
| 4035_at   | YIL156w-A    | 4.5602   | 4.546604 | 4.403283   | 4.690477 | 4.728535 | 4.603602 | 4.61505  | 4.578583 | 4.714366 | 4.546468 | 4.529064 | 4.146336 | 4.277753 | 4.336039 | 4.25855  | 4.556939 | -0.0759  | -0.0412  | 0.0126   | 0.0019   | 1.257846 | 13 |
| 4036_at   | YIL100c-A    | 5.058736 | 4.808373 | 4.786992   | 5.130301 | 5.11128  | 5.265281 | 4.696058 | 4.97957  | 4.935306 | 4.759794 | 5.115541 | 4.993501 | 4.830049 | 5.120639 | 4.954447 | 4.997408 | 0.00555  | -0.0153  | 0.866    | 0.083424 | 1.046974 | 13 |
| 4037_at   | YI0171w-A    | 4.451595 | 4.787157 | 3.744836   | 4.06614  | 4.509376 | 4.238238 | 4.659134 | 4.449449 | 4.270702 | 4.27554  | 4.525946 | 4.026439 | 3.711578 | 3.77480  | 3.866377 | 4.286804 | -0.142   | -0.0647  | 0.0259   | 0.003604 | 1.49771  | 16 |
| 4038_at   | YI068w-A     | 5.104747 | 5.596613 | 4.576843   | 4.796905 | 5.01316  | 5.026849 | 5.203418 | 5.120901 | 5.143395 | 4.973537 | 4.886622 | 4.592638 | 4.696153 | 4.722159 | 4.721313 | 4.942466 | -0.106   | -0.0119  | 0.136    | 0.015876 | 1.323755 | 13 |
| 4039_at   | YI066w-A     | 4.437434 | 4.572575 | 4.210325   | 4.359985 | 4.510934 | 4.886399 | 4.822498 | 5.103317 | 4.724187 | 6.776337 | 6.80046  | 6.530464 | 7.129458 | 7.403994 | 7.497085 | 5.705196 | 0.88     | 0.0335   | 2.47E-06 | 1.66E-06 | 10.30486 | 6  |
| 4040_at   | YI017w-A     | 5.323783 | 5.512182 | 4.868398   | 5.273721 | 5.306295 | 5.152224 | 5.446536 | 5.262196 | 4.983712 | 5.189924 | 5.072642 | 4.570536 | 4.976953 | 4.978664 | 5.066532 | 5.101663 | -0.0807  | 0.00749  | 0.261    | 0.028386 | 1.238484 | 13 |
| 4042_at   | YI023c-A     | 5.382907 | 5.468178 | 4.745936   | 5.074063 | 5.305218 | 5.235399 | 5.197851 | 5.155143 | 5.209279 | 5.09988  | 5.289343 | 4.815104 | 4.978185 | 5.049411 | 5.03444  | 5.134385 | -0.0543  | -0.00596 | 0.398    | 0.041417 | 1.154893 | 13 |
| 4043_s_at | YIL162W SUC2 | 6.734042 | 6.577581 | 4.469896   | 6.978392 | 7.079699 | 6.583092 | 6.778904 | 6.503369 | 6.956125 | 5.047704 | 5.584578 | 5.90516  | 4.693026 | 4.52393  | 4.506974 | 6.419744 | -0.477   | -0.303   | 0.0041   | 0.000718 | 4.60722  | 17 |
| 4044_s_at | YIL106W MOB1 | 6.502165 | 6.604076 | 6.108436   | 6.237253 | 6.180432 | 6.01932  | 5.921957 | 6.29682  | 6.176763 | 6.186939 | 6.28633  | 6.830329 | 6.192354 | 6.375077 | 6.378041 | 6.235676 | 0.00931  | 0.0305   | 0.723    | 0.071013 | 1.089752 | 13 |
| 4045_s_at | YI066C RNR03 | 9.367871 | 9.445008 | 9.357961   | 7.515192 | 7.537147 | 7.960886 | 7.910231 | 7.66482  | 7.523998 | 8.167445 | 8.06797  | 7.923957 | 8.54002  | 8.381422 | 8.748444 | 7.67597  | -0.126   | 0.343    | 0.000494 | 0.000117 | 2.808754 | 14 |
| 4056_at   | YI020C       | 6.078226 | 5.749433 | 4.665851   | 5.92545  | 5.949868 | 5.615963 | 6.093408 | 6.14918  | 6.004978 | 5.781792 | 5.956046 | 5.818067 | 5.263941 | 4.805423 | 5.836655 | 5.924445 | -0.0582  | -0.157   | 0.0603   | 0.00767  | 1.585913 | 13 |
| 4057_at   | YI021W MRS1  | 7.439261 | 7.644941 | 7.503726   | 7.505531 | 7.600892 | 7.461045 | 6.934497 | 6.924311 | 6.817788 | 6.517262 | 6.410509 | 6.7768   | 7.465766 | 6.439528 | 7.692227 | 6.849117 | -0.144   | 0.152    | 0.0417   | 0.00552  | 1.817627 | 14 |
| 4058_at   | YI022W SEC11 | 7.677463 | 7.916388 | 7.971146   | 7.815351 | 7.807395 | 7.770795 | 7.515845 | 7.49701  | 7.289665 | 6.879915 | 6.988791 | 7.2331   | 5.732333 | 5.951651 | 5.904829 | 7.271469 | -0.537   | -0.115   | 9.79E-10 | 1.05E-08 | 4.149095 | 18 |
| 4059_s_at | YI023W DML81 | 5.502649 | 5.727562 | 5.39679    | 5.888167 | 5.915499 | 5.436155 | 5.271673 | 5.330995 | 5.173628 | 5.495186 | 5.236254 | 5.196119 | 5.178116 | 5.006568 | 4.994738 | 5.381813 | -0.142   | -0.017   | 0.0225   | 0.003176 | 1.456123 | 16 |
| 4060_at   | YI024C       | 5.737974 | 5.807941 | 5.508599   | 6.908507 | 6.800299 | 6.478997 | 7.027937 | 7.130117 | 6.578576 | 6.753357 | 6.589904 | 6.795906 | 6.187093 | 6.064492 | 6.085934 | 6.929627 | 0.0777   | -0.278   | 1.98E-05 | 8.12E-06 | 2.225411 | 12 |
| 4061_at   | YI025W MND2  | 4.848453 | 5.140345 | 4.634903   | 5.062822 | 4.956712 | 4.995131 | 5.077861 | 5.054018 | 4.79076  | 5.322655 | 5.300366 | 4.880208 | 4.926296 | 4.957624 | 4.930793 | 5.083584 | 0.0287   | -0.0493  | 0.21     | 0.023354 | 1.179798 | 13 |
| 4062_at   | YI026C YVH1  | 7.528583 | 7.743296 | 7.298231   | 6.931714 | 7.249705 | 6.868534 | 6.58938  | 6.451431 | 6.475435 | 6.255902 | 6.039242 | 5.206644 | 4.736107 | 4.963902 | 4.820358 | 6.160326 | -0.714   | 0.00886  | 1.36E-07 | 2.11E-07 | 6.641357 | 18 |
| 4063_at   | YI027C DAL1  | 6.852726 | 6.665233 | 6.30516    | 9.313481 | 7.197014 | 7.91914  | 8.325706 | 7.959099 | 8.006312 | 8.630375 | 8.494089 | 8.146692 | 6.520242 | 6.08471  | 6.026994 | 8.630548 | -0.141   | -0.596   | 3.09E-05 | 1.17E-05 | 5.011653 | 11 |
| 4064_at   | YI028W DAL1  | 3.950743 | 3.963251 | 3.376645   | 4.534125 | 4.553512 | 4.562154 | 4.275862 | 4.068496 | 4.00663  | 4.29647  | 4.200358 | 4.330067 | 4.244087 | 4.624457 | 4.16954  | 4.375182 | 0.114    | -0.0796  | 0.0714   | 0.008931 | 4.57062  | 13 |
| 4065_at   | YI029W DAL1  | 5.698088 | 5.56921  | 5.580485   | 4.798037 | 4.706598 | 6.713807 | 6.897617 | 6.483947 | 6.793259 | 7.477679 | 6.585482 | 6.809921 | 5.588089 | 5.771379 | 5.490219 | 7.09035  | -0.0273  | -0.396   | 5.88E-05 | 1.98E-05 | 2.678489 | 13 |
| 4066_at   | YI030C DCG2  | 4.221513 | 4.153073 | 4.143662   | 4.618223 | 4.773603 | 4.429624 | 3.682233 | 3.749922 | 3.729923 | 3.82451  | 3.756207 | 3.360816 | 4.48215  | 4.166932 | 3.67274  | 3.927403 | -0.0724  | 0.0705   | 0.403    | 0.041934 | 1.332589 | 13 |
| 4067_at   | YI031C DAL7  | 5.422343 | 5.18435  | 5.315709   | 7.609279 | 7.373266 | 6.707041 | 5.778073 | 5.366932 | 5.327712 | 6.253342 | 5.227706 | 4.943714 | 6.094617 | 5.223981 | 4.872168 | 6.025521 | -0.113   | -0.156   | 0.431    | 0.044572 | 1.739038 | 12 |
| 4068_at   | YI032C DAL3  | 6.39777  | 6.226816 | 6.390221   | 9.219372 | 9.288866 | 8.25033  | 9.11146  | 9.148405 | 9.576936 | 9.004607 | 8.980816 | 8.516859 | 6.64344  | 8.378941 | 8.16905  | 9.36544  | 0.426    | -0.534   | 5.91E-05 | 1.94E-05 | 7.211721 | 10 |
| 4069_at   | YI033W MGA2  | 6.713934 | 7.123632 | 6.874663</ |          |          |          |          |          |          |          |          |          |          |          |          |          |          |          |          |          |          |    |

|         |           |          |          |          |          |          |          |           |          |          |          |          |          |          |          |          |          |           |         |          |          |          |          |    |
|---------|-----------|----------|----------|----------|----------|----------|----------|-----------|----------|----------|----------|----------|----------|----------|----------|----------|----------|-----------|---------|----------|----------|----------|----------|----|
| 4101_at | YIL024C   | 6.404713 | 6.400985 | 6.508616 | 6.792886 | 6.930002 | 6.995691 | 7.896165  | 7.868181 | 7.640367 | 8.180987 | 8.294551 | 8.275427 | 7.218466 | 7.631544 | 7.632647 | 7.926144 | 0.336     | -0.274  | 5.29E-05 | 1.81E-05 | 3.311403 | 10       |    |
| 4102_at | YIL023C   | YKE4     | 7.600161 | 7.372232 | 7.493579 | 6.977466 | 6.947191 | 7.016811  | 6.625515 | 6.904534 | 6.734417 | 6.415745 | 6.669751 | 6.442024 | 6.118903 | 6.475893 | 6.643297 | 6.600457  | -0.296  | 0.0851   | 1.72E-07 | 2.46E-07 | 2.191877 | 16 |
| 4103_at | YIL022W   | TIM44    | 8.231115 | 8.125641 | 7.734613 | 7.778647 | 7.639218 | 7.794769  | 7.485466 | 7.906165 | 7.627454 | 6.954052 | 7.537026 | 7.35233  | 7.246375 | 7.588229 | 7.567689 | 7.46416   | -0.168  | 0.0806   | 0.00401  | 0.000704 | 1.59246  | 16 |
| 4104_at | YIL021W   | RPB3     | 7.662852 | 7.972629 | 7.677117 | 7.039253 | 7.277117 | 7.131921  | 6.970049 | 7.176255 | 7.628672 | 6.920862 | 6.542879 | 5.95545  | 7.077857 | 6.663542 | 6.572355 | 6.684518  | -0.283  | 0.163    | 0.000195 | 5.33E-05 | 2.36376  | 14 |
| 4105_at | YIL020C   | HIS6     | 5.825236 | 5.925142 | 5.386664 | 5.6531   | 5.327127 | 5.398652  | 5.174392 | 5.512001 | 5.116652 | 5.061864 | 5.135139 | 5.089822 | 4.151479 | 4.289778 | 4.283819 | 5.163944  | -0.371  | -0.0518  | 1.17E-07 | 6.57E-07 | 2.677165 | 16 |
| 4106_at | YIL019W   | FAF1     | 5.232222 | 5.380008 | 5.239678 | 4.929897 | 5.121597 | 4.904793  | 5.459698 | 5.32571  | 4.913801 | 5.241327 | 4.835657 | 4.598468 | 4.844826 | 4.543357 | 4.420056 | 4.971680  | -0.173  | -0.0148  | 0.00681  | 0.001363 | 1.581891 | 16 |
| 4107_at | YIL017C   | VID28    | 6.45431  | 6.598547 | 6.495526 | 6.81048  | 6.735327 | 6.996982  | 7.524919 | 7.246702 | 7.332358 | 7.154511 | 7.146383 | 7.473674 | 7.21632  | 7.135887 | 7.186684 | 7.28288   | 0.173   | -0.122   | 0.00035  | 8.68E-05 | 1.773339 | 9  |
| 4108_at | YIL016W   | SNL1     | 6.021509 | 6.077922 | 6.074107 | 5.931865 | 5.864872 | 5.772777  | 5.855625 | 5.487401 | 5.269781 | 5.080321 | 4.662393 | 4.964441 | 4.116724 | 4.091845 | 4.213286 | 5.246326  | -0.527  | -0.0361  | 3.16E-08 | 8.12E-08 | 4.047282 | 18 |
| 4109_at | YIL015W   | BAR1     | 3.10308  | 3.1735   | 2.923105 | 3.574056 | 3.708662 | 3.786953  | 3.300504 | 3.533897 | 3.503152 | 3.165004 | 3.53883  | 3.306679 | 3.188495 | 3.019514 | 3.232039 | 3.518378  | -0.015  | -0.107   | 0.0196   | 0.002818 | 1.341774 | 12 |
| 4110_at | YIL014C-A |          | 3.386456 | 3.269257 | 2.922885 | 3.315482 | 3.478761 | 3.438071  | 3.205184 | 3.322814 | 3.504072 | 3.181408 | 3.303603 | 3.125425 | 3.177817 | 2.985414 | 3.158656 | 3.318121  | -0.0403 | -0.0434  | 0.108    | 0.012899 | 1.184786 | 13 |
| 4111_at | YIL014W   | MNT3     | 6.833648 | 6.830212 | 6.161927 | 6.887843 | 7.107439 | 6.770044  | 7.591008 | 7.282947 | 6.998782 | 7.411683 | 7.011654 | 7.508739 | 6.566473 | 6.763786 | 7.12292  | 7.278894  | 0.0681  | -0.158   | 0.0136   | 0.00204  | 1.635884 | 12 |
| 4112_at | YIL013C   | PDR11    | 6.975196 | 6.969028 | 6.660463 | 7.348632 | 7.168455 | 7.140434  | 7.475718 | 7.084449 | 7.127041 | 7.191677 | 7.196182 | 7.748257 | 9.017098 | 8.352219 | 8.817719 | 7.374014  | 0.45    | 0.121    | 3.98E-06 | 2.35E-06 | 3.294005 | 7  |
| 4113_at | YIL012W   |          | 3.856501 | 3.54197  | 3.180641 | 3.520253 | 3.696055 | 3.700471  | 3.490754 | 3.479426 | 3.579641 | 3.538417 | 3.646005 | 3.774647 | 3.676777 | 3.945342 | 3.773217 | 3.618095  | 0.0678  | 0.0135   | 0.153    | 0.017574 | 1.197016 | 13 |
| 4114_at | YIL011W   | TIR3     | 12.8331  | 12.60925 | 12.32542 | 12.58961 | 12.67586 | 12.35139  | 12.49296 | 12.26136 | 12.1492  | 11.99023 | 12.22092 | 12.20614 | 12.32769 | 12.39382 | 12.18028 | 12.25794  | -0.0962 | 0.0548   | 0.032    | 0.004357 | 1.332785 | 13 |
| 4115_at | YIL010W   | DOT5     | 7.025465 | 7.10941  | 6.682793 | 7.155153 | 7.086401 | 6.967061  | 7.259368 | 7.344335 | 7.415297 | 7.043097 | 7.160724 | 7.474064 | 7.650304 | 7.804388 | 7.185551 | 7.27001   | 0.148   | -0.00781 | 0.0169   | 0.002472 | 1.478853 | 10 |
| 4116_at | YIL009C-A | EST3     | 6.794094 | 6.619783 | 6.750127 | 6.522502 | 6.496588 | 6.322977  | 6.007921 | 6.123686 | 6.118209 | 5.842233 | 6.152003 | 6.248261 | 5.313974 | 5.786204 | 5.542307 | 6.088366  | -0.296  | 0.0133   | 1.54E-05 | 6.61E-06 | 2.189276 | 16 |
| 4117_at | YIL009C-A | EST3     | 5.466938 | 4.946873 | 4.618671 | 4.836906 | 4.732263 | 4.748964  | 4.539014 | 4.698463 | 4.800579 | 4.498985 | 4.762408 | 4.728229 | 4.269383 | 4.048551 | 3.931255 | 4.640194  | -0.223  | -0.0274  | 0.000824 | 0.00018  | 1.807334 | 16 |
| 4118_at | YIL009W   | FAA3     | 5.371946 | 5.217927 | 4.641354 | 4.954009 | 5.200079 | 4.708349  | 4.443182 | 4.542789 | 4.601308 | 4.087916 | 4.430756 | 4.522824 | 4.568182 | 4.171264 | 4.638634 | 4.493547  | -0.191  | 0.0773   | 0.00035  | 0.00133  | 1.658209 | 16 |
| 4119_at | YIL008W   | URM1     | 7.342506 | 7.595229 | 7.84303  | 7.269682 | 7.245618 | 6.958629  | 6.885515 | 6.85666  | 6.845454 | 7.021981 | 6.944339 | 7.104217 | 6.097184 | 6.872014 | 7.021508 | 6.918646  | -0.153  | 0.0932   | 0.00101  | 0.000215 | 1.603123 | 14 |
| 4120_at | YIL007C   | NAS2     | 5.420825 | 5.790044 | 5.307854 | 6.179341 | 6.015515 | 5.660406  | 5.916484 | 5.888935 | 5.86915  | 5.890946 | 6.245977 | 6.030389 | 4.966747 | 5.034404 | 5.164886 | 6.017379  | -0.104  | -0.202   | 4.07E-05 | 1.46E-05 | 1.902383 | 12 |
| 4121_at | YIL006W   | YIA6     | 5.402419 | 5.527082 | 4.611649 | 5.929425 | 6.098879 | 5.771757  | 6.322132 | 5.884593 | 6.673189 | 6.527644 | 6.702237 | 6.939772 | 7.091188 | 6.343157 | 5.678871 | 6.538442  | 0.403   | -0.17    | 8.79E-05 | 2.74E-05 | 2.912409 | 9  |
| 4122_at | YIL005W   | EPS1     | 7.386522 | 7.606909 | 7.411846 | 7.494199 | 7.37279  | 7.571615  | 7.505058 | 7.49889  | 7.503448 | 7.324419 | 7.55146  | 7.982958 | 7.453993 | 7.80397  | 7.474106 | 7.554417  | 0.0376  | -0.00966 | 0.561    | 0.056349 | 1.104694 | 13 |
| 4123_at | YIL004C   | BET1     | 7.001695 | 6.986282 | 6.970555 | 7.089964 | 7.235578 | 7.170224  | 6.86858  | 6.9462   | 6.837133 | 6.734215 | 6.791178 | 6.799309 | 6.308996 | 6.325572 | 6.286834 | 6.892951  | -0.19   | -0.0641  | 9.76E-07 | 8.33E-07 | 1.65594  | 16 |
| 4124_at | YIL004C   | SYG1     | 9.649279 | 9.931058 | 9.370375 | 9.926595 | 9.970946 | 9.984836  | 10.61349 | 10.54205 | 10.45394 | 10.59324 | 10.71748 | 10.8811  | 10.08152 | 9.906171 | 10.82723 | 10.57441  | 0.194   | -0.174   | 0.00215  | 0.000412 | 2.082449 | 9  |
| 4125_at | YIL046W   | MET30    | 6.77705  | 6.967551 | 6.476202 | 7.187739 | 7.239108 | 7.320626  | 7.799424 | 7.956653 | 7.778163 | 8.050496 | 7.71537  | 7.760255 | 8.874473 | 8.130224 | 8.519225 | 7.741258  | 0.454   | -0.0324  | 1.88E-06 | 1.35E-06 | 3.328769 | 7  |
| 4126_at | YIL045W   | PIG2     | 4.950548 | 5.524525 | 5.143727 | 6.619456 | 6.270393 | 6.379694  | 6.982825 | 6.833477 | 7.224911 | 6.736774 | 6.769928 | 6.680278 | 6.343193 | 6.061174 | 7.513412 | 7.095424  | 0.359   | -0.322   | 0.000317 | 7.98E-05 | 3.877925 | 10 |
| 4127_at | YIL044C   | AGE2     | 7.141804 | 7.197167 | 6.736802 | 6.876075 | 6.935195 | 6.722814  | 6.886946 | 6.768041 | 6.707889 | 6.790979 | 6.807673 | 6.92596  | 5.893819 | 5.949692 | 6.330626 | 6.78162   | -0.225  | -0.0686  | 0.000125 | 3.66E-05 | 1.813842 | 16 |
| 4128_at | YIL043C   | CBR1     | 11.18598 | 10.89756 | 10.88005 | 10.92559 | 11.11371 | 10.83909  | 10.76984 | 10.66044 | 10.27152 | 10.18354 | 10.28099 | 9.529335 | 9.02931  | 9.931899 | 10.50797 | -0.444    | -0.0897 | 3.39E-08 | 8.49E-08 | 3.245152 | 16       |    |
| 4129_at | YIL042C   | PKP1     | 7.100395 | 6.789668 | 6.074359 | 7.358875 | 7.267093 | 6.727965  | 7.414772 | 7.954405 | 7.331208 | 7.734643 | 7.833373 | 7.987298 | 6.360054 | 6.867742 | 6.836601 | 6.76727   | 0.0529  | -0.282   | 0.00186  | 0.000361 | 2.152554 | 12 |
| 4130_at | YIL041W   | GPV36    | 8.15982  | 7.996168 | 7.798577 | 8.681618 | 8.267013 | 8.304392  | 8.675144 | 8.67877  | 8.716048 | 8.714811 | 8.608475 | 9.436011 | 7.112275 | 7.626925 | 7.826665 | 8.803108  | -0.115  | -0.31    | 4.52E-05 | 1.59E-05 | 2.488403 | 12 |
| 4131_at | YIL040W   | APQ12    | 5.948762 | 5.591771 | 5.141541 | 5.930099 | 5.93958  | 5.732024  | 5.593819 | 6.049506 | 5.325071 | 4.741345 | 3.542985 | 5.39171  | 3.841028 | 4.521136 | 4.174313 | 5.480508  | -0.39   | -0.163   | 5.72E-05 | 1.94E-05 | 2.94817  | 10 |
| 4132_at | YIL039W   |          | 8.095266 | 8.093953 | 7.534395 | 8.574015 | 8.461287 | 7.917347  | 8.656718 | 8.364382 | 8.14537  | 8.855462 | 8.439176 | 7.104152 | 7.394841 | 6.761977 | 8.449531 | 8.49531   | -0.189  | -0.263   | 0.000171 | 4.75E-05 | 2.539052 | 15 |
| 4133_at | YIL038C   | NOT3     | 6.156005 | 6.940311 | 5.784322 | 6.208712 | 6.360098 | 5.808591  | 6.062536 | 6.112842 | 5.600959 | 6.04584  | 5.957122 | 5.967646 | 5.846899 | 6.258009 | 5.859364 | 5.968255  | -0.0723 | 0.0491   | 0.392    | 0.040889 | 1.264979 | 13 |
| 4134_at | YIL037C   | PRM2     | 4.326595 | 4.619655 | 4.104807 | 4.268134 | 4.381068 | 4.439279  | 4.117039 | 3.999056 | 4.187974 | 4.524847 | 4.967124 | 4.919536 | 4.602631 | 5.000335 | 4.658043 | 4.473087  | 0.177   | 0.0394   | 0.0123   | 0.001862 | 1.598176 | 13 |
| 4135_at | YIL036W   | CST6     | 5.327153 | 5.527861 | 5.20932  | 5.539228 | 5.394226 | 5.748053  | 5.451114 | 5.342938 | 5.458884 | 5.551727 | 5.71503  | 6.14451  | 6.241462 | 6.560084 | 6.42716  | 6.565939  | 0.273   | 0.0627   | 0.000021 | 8.53E-06 | 2.064132 | 8  |
| 4136_at | YIL035C   | CKA1     | 6.668414 | 6.887662 | 6.303547 | 6.18716  | 6.34774  | 6.256972  | 5.892786 | 5.791167 | 5.929887 | 5.588376 | 5.360751 | 5.09213  | 5.127332 | 4.908892 | 4.937898 | 5.628994  | -0.451  | 0.0525   | 5.14E-07 | 5.23E-07 | 3.30139  | 16 |
| 4137_at | YIL034C   | CAF2     | 7.957336 | 8.146696 | 8.323701 | 8.385977 | 8.142229 | 8.327804  | 8.090762 | 7.958394 | 8.359015 | 7.192548 | 7.889661 | 8.371889 | 6.951543 | 7.204946 | 7.358063 | 8.059637  | -0.228  | -0.105   | 0.0014   | 0.000284 | 2.127471 | 15 |
| 4138_at | YIL033C   | BCY1     | 8.011465 | 7.568647 | 8.24965  | 8.930412 | 8.797546 | 9.126297  | 8.881209 | 9.368009 | 9.532661 | 8.251113 | 8.736031 | 9.054084 | 8.163084 | 8.478756 | 8.862754 | 8.997794  | -0.0496 | -0.128   | 0.0935   | 0.011343 | 1.462569 | 12 |
| 4139_at | YIL032C   |          | 5.244461 | 4.934448 | 4.828677 | 5.026227 | 4.980691 | 5.460053  | 4.71724  | 4.978911 | 5.319002 | 4.816031 | 5.051882 | 4.456265 | 4.832696 | 5.147577 | 4.865322 | 4.9494714 | -0.0236 | -0.00879 | 0.843    | 0.081469 | 1.065537 | 10 |
| 4140_at | YIL031W   | ULP2     | 5.055101 | 5.282815 | 4.606295 | 4.990172 | 4.924785 | 5.214004  | 5.062426 | 5.384039 | 5.640208 | 5.808723 | 5.873836 | 6.130133 | 6.828854 | 6.839671 | 8.329549 | 5.640944  | 0.912   | 0.306    | 3.04E-10 | 6.18E-09 | 1.120822 | 5  |
| 4141_at | YIL030C   | SSM4     | 7.82831  | 8.126868 | 7.773888 | 7.718591 | 7.727632 | 7.9309291 | 8.2349   | 8.236869 | 9.941674 |          |          |          |          |          |          |           |         |          |          |          |          |    |

|           |         |        |          |          |          |          |          |          |          |          |          |          |            |           |          |          |          |          |         |           |          |          |          |    |
|-----------|---------|--------|----------|----------|----------|----------|----------|----------|----------|----------|----------|----------|------------|-----------|----------|----------|----------|----------|---------|-----------|----------|----------|----------|----|
| 4173_at   | YIL093C | RSM25  | 5.888511 | 6.022515 | 5.394919 | 6.247675 | 6.468927 | 6.457004 | 6.285345 | 6.542936 | 6.21319  | 5.399483 | 5.3768     | 5.403423  | 4.353695 | 5.045953 | 4.887492 | 5.985808 | -0.337  | -0.189    | 0.000285 | 7.30E-05 | 2.799121 | 15 |
| 4174_at   | YIL092W |        | 5.043461 | 5.110547 | 4.36445  | 4.975372 | 4.851142 | 4.891639 | 4.991371 | 5.237445 | 5.097939 | 4.970311 | 4.958184   | 4.674022  | 4.349306 | 4.490916 | 4.359751 | 4.96554  | -0.115  | -0.096    | 0.000439 | 0.000761 | 1.521641 | 12 |
| 4175_at   | YIL091C |        | 6.376596 | 6.660685 | 6.492731 | 5.822835 | 6.167568 | 5.901443 | 5.905579 | 6.175035 | 5.703283 | 5.831729 | 5.249702   | 4.822684  | 4.603801 | 4.940297 | 4.680997 | 5.523398 | -0.469  | 0.0198    | 5.3E-06  | 2.94E-06 | 3.467995 | 18 |
| 4176_at   | YIL090W | ICE2   | 7.077165 | 6.998174 | 6.052305 | 6.418155 | 6.435286 | 6.574531 | 7.170617 | 7.029683 | 6.954559 | 7.064438 | 7.17394    | 7.331838  | 7.569215 | 6.808185 | 7.2268   | 6.994496 | 0.167   | -0.0187   | 0.108    | 0.012889 | 1.565927 | 13 |
| 4177_at   | YIL089W |        | 5.155072 | 4.843409 | 4.669971 | 5.013388 | 4.982671 | 4.760516 | 5.066286 | 5.135957 | 5.166725 | 5.127331 | 5.230054   | 4.99007   | 4.684667 | 4.708383 | 4.705007 | 5.08542  | -0.0344 | -0.0825   | 0.0102   | 0.001579 | 1.282753 | 13 |
| 4178_at   | YIL088C | AVT7   | 8.57891  | 8.863754 | 8.482149 | 8.546468 | 8.493187 | 8.604471 | 8.363822 | 8.438955 | 8.364393 | 7.717526 | 7.941024   | 8.47618   | 8.038965 | 7.856589 | 7.863336 | 8.265804 | -0.212  | 0.00666   | 0.00117  | 0.00242  | 1.75581  | 16 |
| 4179_at   | YIL087C |        | 7.788959 | 7.4706   | 7.340579 | 8.738045 | 8.480487 | 8.74594  | 8.753299 | 8.743169 | 8.780362 | 8.278065 | 8.514351   | 8.993037  | 7.40499  | 7.128787 | 7.705378 | 8.804786 | -0.0549 | -0.361    | 2.65E-06 | 1.74E-06 | 2.536194 | 12 |
| 4180_at   | YIL086C |        | 2.940913 | 3.079132 | 2.833721 | 3.088714 | 3.399306 | 3.339679 | 3.066382 | 3.043669 | 3.275419 | 2.814301 | 3.125878   | 3.125317  | 3.036428 | 3.200468 | 3.287674 | 3.150976 | 0.0296  | -0.0197   | 0.602    | 0.060076 | 1.098929 | 13 |
| 4181_at   | YIL085C | KTR7   | 7.317484 | 7.376832 | 6.897569 | 7.290018 | 7.263764 | 7.374327 | 7.318462 | 7.371525 | 7.014223 | 7.10776  | 7.047018   | 7.218621  | 6.768058 | 7.148832 | 6.985851 | 7.207793 | -0.0706 | -0.0326   | 0.0726   | 0.009059 | 1.223885 | 13 |
| 4182_at   | YIL084C | SDS3   | 4.449569 | 4.504435 | 3.84891  | 4.45349  | 4.585692 | 4.255078 | 4.415857 | 4.707815 | 4.515324 | 4.261451 | 4.597703   | 3.987053  | 4.517893 | 4.299046 | 4.574398 | 4.432445 | 0.027   | -0.0164   | 0.814    | 0.078958 | 1.086672 | 13 |
| 4183_at   | YIL083C |        | 8.233692 | 8.222036 | 7.675647 | 7.769996 | 7.754349 | 7.840173 | 7.800855 | 7.507344 | 7.736968 | 7.19597  | 6.992926   | 7.582179  | 6.163635 | 6.08622  | 6.686597 | 7.444742 | -0.451  | -0.0732   | 1.32E-06 | 1.05E-06 | 3.305929 | 16 |
| 4185_at   | YIL079C | AIR1   | 5.718365 | 5.621874 | 5.116221 | 5.585586 | 5.720854 | 5.293468 | 5.674946 | 5.600067 | 5.39041  | 5.865094 | 5.40782    | 5.314565  | 4.68212  | 4.666823 | 4.546881 | 5.529153 | -0.204  | -0.131    | 0.000207 | 5.57E-05 | 1.927125 | 15 |
| 4186_at   | YIL078W | THS1   | 10.36643 | 10.18457 | 10.05861 | 9.318781 | 9.526606 | 9.181246 | 9.373056 | 9.234743 | 9.087942 | 8.96268  | 8.530324   | 8.676807  | 7.858406 | 7.958987 | 7.87645  | 8.87162  | -0.585  | 0.0463    | 1.83E-09 | 1.44E-08 | 4.718569 | 18 |
| 4187_at   | YIL077C |        | 5.601817 | 5.661271 | 4.812005 | 6.927968 | 6.911593 | 6.484073 | 7.192159 | 7.403796 | 7.57391  | 7.198038 | 7.603913   | 7.96388   | 7.502549 | 7.353678 | 7.764919 | 7.590781 | 0.549   | -0.312    | 2.04E-06 | 1.44E-06 | 5.14472  | 10 |
| 4188_at   | YIL076W | SEC28  | 8.388497 | 8.355787 | 8.176124 | 8.032415 | 8.077931 | 7.67698  | 7.58017  | 7.469789 | 7.47607  | 6.825489 | 7.014049   | 7.112799  | 5.794886 | 5.561136 | 6.241812 | 7.252415 | -0.645  | -0.0429   | 7.38E-09 | 3.16E-08 | 5.524104 | 18 |
| 4189_at   | YIL075C | RPN2   | 8.930053 | 9.294045 | 9.22726  | 9.066106 | 9.017034 | 9.245803 | 9.340195 | 9.11391  | 9.112531 | 9.645701 | 9.262006   | 9.626512  | 9.996574 | 9.679659 | 10.05984 | 9.329186 | 0.215   | 0.0533    | 8.85E-05 | 2.76E-05 | 1.767908 | 8  |
| 4190_at   | YIL074C | SER33  | 9.336889 | 9.399361 | 9.414629 | 9.022239 | 8.877228 | 9.067165 | 8.025324 | 7.772535 | 8.010709 | 8.010439 | 7.169373   | 7.56518   | 6.969401 | 6.741354 | 6.677262 | 7.706914 | -0.769  | 0.0945    | 3.58E-07 | 4.02E-07 | 7.670173 | 18 |
| 4191_at   | YIL073C | SPO22  | 3.046688 | 3.375424 | 2.810603 | 3.021257 | 3.035457 | 3.097512 | 3.065384 | 2.891531 | 2.822796 | 3.232699 | 3.233936   | 3.459798  | 3.552717 | 3.248629 | 3.267982 | 3.124744 | 0.0923  | 0.0228    | 0.0673   | 0.008472 | 1.277369 | 13 |
| 4192_at   | YIL119C | RP11   | 6.296296 | 6.090971 | 4.38018  | 6.736809 | 6.704422 | 7.180335 | 6.859966 | 7.316536 | 7.755861 | 9.171376 | 9.985302   | 9.353102  | 8.985402 | 8.650953 | 8.983667 | 8.221182 | 1.11    | -0.22     | 3.61E-05 | 1.32E-05 | 19.20296 | 4  |
| 4193_at   | YIL118W | RHO3   | 6.718698 | 6.807931 | 6.413342 | 6.674488 | 7.005577 | 6.523672 | 6.939561 | 6.798334 | 6.64936  | 7.384844 | 6.838135   | 6.867610  | 6.969174 | 6.73303  | 7.395386 | 6.91524  | 0.114   | -0.0224   | 0.1      | 0.012051 | 1.353716 | 13 |
| 4194_at   | YIL117C | PRM5   | 5.6433   | 5.67512  | 5.483006 | 8.29009  | 8.102837 | 8.810621 | 8.153022 | 8.359053 | 8.029195 | 9.525109 | 9.403228   | 8.721221  | 6.608963 | 6.603926 | 6.322276 | 8.84112  | 0.304   | -0.769    | 9.44E-07 | 8.15E-07 | 10.42715 | 11 |
| 4195_at   | YIL116W | HIS5   | 9.123205 | 9.304564 | 8.976946 | 8.937194 | 9.153657 | 9.001212 | 9.064254 | 8.715885 | 9.145635 | 8.547399 | 8.215493   | 8.872224  | 8.128793 | 7.676768 | 8.619232 | 8.760108 | -0.276  | -0.0317   | 0.000849 | 0.000185 | 2.077971 | 16 |
| 4196_at   | YIL115C | NUP159 | 6.12928  | 6.456957 | 5.940217 | 6.046414 | 6.215092 | 6.23042  | 6.317401 | 6.245527 | 5.88016  | 6.050525 | 5.957939   | 6.114293  | 6.115227 | 6.614657 | 6.112126 | 6.103153 | 0.0146  | 0.0356    | 0.513    | 0.052026 | 1.112841 | 13 |
| 4197_at   | YIL114C | POR2   | 8.376206 | 8.231363 | 8.64109  | 8.204602 | 8.244973 | 8.161612 | 7.848106 | 7.426517 | 7.83598  | 6.817368 | 6.749575   | 7.001121  | 5.712162 | 6.264499 | 5.864176 | 7.300378 | -0.771  | -0.0709   | 1.41E-08 | 4.78E-08 | 7.723999 | 18 |
| 4198_at   | YIL113W | SDP1   | 5.963518 | 6.075918 | 6.294101 | 7.593052 | 7.245513 | 7.436914 | 7.487489 | 7.108209 | 7.477426 | 6.27119  | 6.737555   | 7.066133  | 6.119798 | 6.042459 | 6.44295  | 7.236476 | -0.0633 | -0.284    | 0.00283  | 0.000518 | 2.143058 | 12 |
| 4199_at   | YIL112W | HOS4   | 6.159124 | 6.523774 | 6.206312 | 6.657808 | 6.625899 | 6.55104  | 7.028212 | 6.897504 | 7.60774  | 7.428343 | 7.076489   | 7.399219  | 7.274885 | 7.554756 | 7.842133 | 7.067767 | 0.352   | -0.0424   | 7.53E-06 | 3.82E-06 | 5.542976 | 7  |
| 4200_at   | YIL111W | COX5B  | 7.821468 | 7.593224 | 8.253582 | 8.135635 | 8.086494 | 8.240766 | 8.379989 | 8.303288 | 8.369673 | 8.557565 | 8.260834   | 8.768376  | 7.640668 | 6.964201 | 7.94976  | 8.425796 | -0.0649 | -0.202    | 0.00314  | 0.000567 | 1.778139 | 12 |
| 4201_at   | YIL110W | MN11   | 7.431084 | 7.487239 | 6.943503 | 6.571318 | 6.923332 | 6.54295  | 6.500514 | 6.485611 | 6.555449 | 6.814328 | 6.356169   | 6.185586  | 6.057982 | 6.169103 | 6.64598  | 6.419844 | -0.163  | 0.146     | 0.00472  | 0.000811 | 1.85017  | 14 |
| 4202_at   | YIL109C | SEC24  | 7.953026 | 7.981613 | 7.346384 | 7.522376 | 7.563627 | 7.606973 | 7.190793 | 7.144255 | 7.30278  | 6.715167 | 6.712089   | 7.223312  | 6.073913 | 6.378322 | 6.472843 | 7.073662 | -0.392  | -0.00795  | 6.81E-06 | 3.54E-06 | 2.825661 | 16 |
| 4203_at   | YIL108W |        | 9.285998 | 9.396528 | 8.975479 | 9.359217 | 9.215372 | 9.190607 | 8.869319 | 8.802637 | 9.234321 | 8.3531   | 8.709799   | 9.098087  | 6.640014 | 6.915115 | 6.978068 | 8.904895 | -0.121  | 0.0444    | 0.0843   | 0.010343 | 1.377315 | 16 |
| 4204_at   | YIL107C | PFK26  | 7.326359 | 7.637569 | 6.822922 | 7.713081 | 7.763765 | 6.982799 | 7.95553  | 7.642894 | 7.225694 | 8.2837   | 8.17011    | 8.18576   | 8.985424 | 9.058676 | 8.873142 | 7.913314 | 0.462   | 0.0541    | 1.54E-05 | 6.60E-06 | 3.407653 | 7  |
| 4205_at   | YIL105C | SLM1   | 4.273497 | 4.123497 | 3.736751 | 4.532838 | 4.337133 | 4.22361  | 4.252608 | 4.444    | 4.430025 | 4.174333 | 4.640403   | 4.4875302 | 4.962489 | 4.980574 | 5.444433 | 4.518488 | 0.27    | 0.0207    | 0.000313 | 7.88E-05 | 2.043883 | 7  |
| 4206_at   | YIL104C | SHQ1   | 5.305167 | 5.29059  | 5.10661  | 5.183573 | 5.198076 | 4.970112 | 4.893672 | 5.334919 | 4.92277  | 4.799328 | 5.023147   | 4.370951  | 5.048388 | 4.9548   | 4.564361 | 4.897244 | -0.121  | 0.0428    | 0.0483   | 0.00629  | 1.376533 | 16 |
| 4207_at   | YIL103W | DPH1   | 7.02236  | 7.23413  | 6.433845 | 6.165724 | 6.508685 | 6.029873 | 6.272215 | 6.864842 | 6.634906 | 6.398784 | 6.297361   | 5.604141  | 5.813356 | 6.22462  | 5.874715 | 6.183825 | -0.23   | 0.0641    | 0.0143   | 0.002122 | 1.841147 | 16 |
| 4208_at   | YIL102C |        | 2.981464 | 3.084173 | 2.742528 | 3.190987 | 3.186392 | 3.417449 | 3.298821 | 3.312558 | 3.639534 | 3.006417 | 3.294034   | 2.979345  | 3.182076 | 3.358617 | 3.307938 | 3.293417 | 0.0568  | -0.0474   | 0.215    | 0.023892 | 1.228872 | 16 |
| 4209_at   | YIL101C | XBP1   | 3.956125 | 3.966845 | 3.578577 | 4.179029 | 4.361454 | 4.62607  | 4.490559 | 4.911709 | 4.989172 | 5.1961   | 5.29806    | 5.164495  | 7.413869 | 7.294489 | 7.488878 | 5.053617 | 0.899   | 0.156     | 8.24E-10 | 9.87E-09 | 10.82712 | 6  |
| 4210_at   | YIL100W |        | 4.436736 | 4.053318 | 3.905381 | 4.090962 | 4.289309 | 4.573006 | 4.23185  | 4.332023 | 4.473947 | 4.002698 | 4.080596   | 4.065888  | 4.064478 | 4.473699 | 4.400961 | 4.235135 | 0.015   | -0.000118 | 0.945    | 0.090424 | 1.040497 | 13 |
| 4211_at   | YIL099W | SGA1   | 7.520876 | 7.777015 | 8.027734 | 8.203078 | 8.25667  | 8.166147 | 8.625038 | 8.717122 | 8.504888 | 8.246392 | 8.671102   | 8.671212  | 7.793922 | 7.271641 | 9.226596 | 8.593074 | 0.318   | -0.0451   | 0.000152 | 4.33E-05 | 2.322997 | 7  |
| 4212_g_at | YIL099W | SGA1   | 5.400277 | 5.728009 | 5.283828 | 6.020312 | 5.966519 | 5.932716 | 6.597985 | 6.604984 | 6.526693 | 6.342006 | 6.58582    | 6.442221  | 6.782801 | 6.903111 | 6.910534 | 6.508518 | 0.323   | -0.109    | 2.48E-05 | 9.72E-06 | 3.253201 | 9  |
| 4213_at   | YIL098C | FMC1   | 6.073291 | 6.421092 | 6.393243 | 6.602943 | 6.587013 | 6.834598 | 6.770206 | 7.06013  | 6.659912 | 6.747889 | 6.574477   | 6.515002  | 7.215866 | 6.609636 | 6.6147   | 6.782814 | 0.101   | -0.0589   | 0.0833   | 0.010227 | 1.357089 | 13 |
| 4214_at   | YIL097W | FYV10  | 3.835187 | 4.103214 | 3.204273 | 4.812366 | 4.694435 | 4.145497 | 4.186392 | 4.934983 | 4.959912 | 5.126324 | 5.294487</ |           |          |          |          |          |         |           |          |          |          |    |

|           |           |        |          |          |          |          |          |          |          |          |          |          |          |          |          |          |          |          |         |           |          |          |          |    |
|-----------|-----------|--------|----------|----------|----------|----------|----------|----------|----------|----------|----------|----------|----------|----------|----------|----------|----------|----------|---------|-----------|----------|----------|----------|----|
| 4246_at   | YIL155C   | GUT2   | 5.634565 | 5.82801  | 4.921581 | 6.294339 | 6.018764 | 5.477367 | 6.720378 | 7.130311 | 6.33468  | 6.769411 | 6.125117 | 6.396096 | 6.028456 | 7.295671 | 7.017749 | 6.553604 | 0.483   | -0.028    | 0.0014   | 0.000284 | 3.602235 | 7  |
| 4247_at   | YIL154C   | IMP2   | 8.74275  | 8.489908 | 8.437577 | 9.125012 | 8.998361 | 8.777779 | 9.591884 | 9.798312 | 9.331746 | 9.950865 | 10.05725 | 9.403754 | 10.0147  | 10.11392 | 9.984799 | 9.651599 | 0.401   | -0.102    | 1.31E-05 | 5.84E-06 | 2.895479 | 7  |
| 4248_at   | YIL153W   | RRD1   | 7.013708 | 7.053289 | 6.852266 | 7.260071 | 7.233293 | 7.5377   | 7.972759 | 7.667504 | 7.591525 | 8.414908 | 8.760599 | 8.547879 | 8.973234 | 8.317557 | 8.026839 | 0.462    | -0.0692 | 1.54E-06  | 1.17E-06 | 3.399106 | 7        |    |
| 4249_at   | YIL152W   |        | 7.148769 | 6.860651 | 6.433404 | 7.330471 | 7.373164 | 7.276692 | 7.758039 | 6.840432 | 7.535363 | 8.925851 | 8.902494 | 8.510088 | 9.538319 | 9.792066 | 9.933005 | 8.376509 | 0.808   | -0.0324   | 2.88E-07 | 3.42E-07 | 8.51112  | 6  |
| 4250_at   | YIL151C   |        | 5.047255 | 5.602665 | 4.44534  | 5.736035 | 5.677168 | 5.727495 | 6.300293 | 6.024441 | 5.722689 | 5.830951 | 5.800627 | 6.353467 | 5.383084 | 5.128927 | 5.332458 | 6.038327 | 0.0466  | -0.232    | 0.00027  | 0.00043  | 1.889384 | 12 |
| 4251_at   | YIL150C   | MCM10  | 4.241729 | 4.167351 | 3.691551 | 4.231595 | 4.291806 | 4.266863 | 4.238516 | 4.189527 | 4.083964 | 4.180959 | 4.008473 | 3.842737 | 3.831409 | 3.559576 | 3.776593 | 4.147541 | -0.0824 | -0.08     | 0.00419  | 0.000732 | 1.386085 | 12 |
| 4252_at   | YIL149C   | MLP2   | 5.368841 | 5.916587 | 5.457232 | 5.42701  | 5.510831 | 5.505288 | 5.357899 | 5.098409 | 4.910178 | 4.819635 | 4.847915 | 4.995336 | 6.182021 | 5.319529 | 5.211603 | 5.06669  | -0.043  | 0.126     | 0.0451   | 0.005926 | 1.524413 | 13 |
| 4253_i_at | YIL148W   | RPL40A | 8.896702 | 9.14706  | 9.873289 | 8.640917 | 8.63186  | 9.388629 | 8.166471 | 8.066529 | 8.07862  | 7.326734 | 6.882661 | 8.164782 | 6.049345 | 6.207521 | 7.38719  | 7.844915 | -0.751  | 0.0497    | 4.58E-05 | 1.60E-05 | 7.330303 | 18 |
| 4254_at   | YIL147C   | SLN1   | 5.43764  | 5.517059 | 4.845948 | 5.365949 | 5.599256 | 5.441152 | 5.862036 | 5.540641 | 5.340097 | 5.379306 | 5.146166 | 5.248727 | 5.434679 | 5.215584 | 5.290392 | 5.443044 | -0.0147 | -0.0396   | 0.555    | 0.055874 | 1.123247 | 13 |
| 4255_at   | YIL146C   | ECM37  | 5.686721 | 5.629382 | 4.987564 | 6.589741 | 6.607496 | 6.419443 | 7.705951 | 7.231801 | 7.23416  | 7.720071 | 7.485322 | 8.074996 | 7.254343 | 7.049326 | 7.524429 | 7.58164  | 0.502   | -0.342    | 1.72E-06 | 1.26E-06 | 5.128349 | 10 |
| 4256_at   | YIL145C   | PAN6   | 7.147676 | 7.28024  | 7.364578 | 7.669981 | 7.443734 | 7.874076 | 7.010132 | 6.734817 | 6.663099 | 6.347418 | 6.384333 | 6.877084 | 6.063144 | 6.284035 | 6.54071  | 6.863068 | -0.31   | -0.0107   | 0.00442  | 0.000766 | 2.276986 | 16 |
| 4257_at   | YIL144W   | TID3   | 2.741442 | 2.725762 | 2.613921 | 2.939318 | 2.968334 | 2.73425  | 2.720606 | 2.76443  | 2.694949 | 2.927723 | 2.767643 | 3.12375  | 3.316316 | 3.172843 | 3.562878 | 2.884626 | 0.163   | 0.04      | 0.000193 | 5.27E-05 | 1.540347 | 16 |
| 4258_at   | YIL143C   | SSL2   | 5.198733 | 5.522506 | 4.532157 | 5.384291 | 5.314482 | 5.267656 | 5.579786 | 5.877407 | 5.986248 | 6.856054 | 6.293534 | 6.656144 | 7.714381 | 7.106653 | 7.787748 | 6.28521  | 0.667   | -0.000527 | 7.83E-06 | 3.94E-06 | 5.859981 | 6  |
| 4259_at   | YIL142W   | CCT2   | 9.27447  | 9.258844 | 9.313061 | 8.966853 | 9.006947 | 8.875106 | 8.624991 | 8.706706 | 8.456792 | 8.452617 | 8.479789 | 8.234133 | 8.211889 | 8.761488 | 8.328777 | 8.509168 | -0.235  | 0.0986    | 2.39E-05 | 9.45E-06 | 1.866767 | 16 |
| 4260_at   | YIL141W   |        | 5.45872  | 5.616119 | 5.170463 | 5.665915 | 5.738086 | 5.591412 | 5.154663 | 5.041928 | 5.382575 | 4.964959 | 5.334653 | 4.955545 | 5.251534 | 5.309378 | 5.283543 | 5.254924 | -0.0731 | 0.0329    | 0.292    | 0.031314 | 1.218141 | 13 |
| 4260_f_at | YIL176C   | PAU14  | 11.93465 | 12.07354 | 12.37659 | 12.02528 | 12.01067 | 12.19086 | 11.40799 | 11.72824 | 12.05664 | 11.32574 | 11.96409 | 12.22854 | 11.50671 | 12.12966 | 12.14108 | 11.82868 | -0.0576 | 0.057     | 0.409    | 0.042514 | 1.25934  | 16 |
| 4285_at   | YIL166C   |        | 7.853718 | 7.514977 | 7.77445  | 7.881402 | 8.003371 | 7.975806 | 8.060708 | 8.124261 | 8.140099 | 7.984643 | 8.027563 | 7.971055 | 7.273003 | 7.230316 | 7.508181 | 8.02206  | -0.0365 | -0.179    | 0.00468  | 0.000805 | 1.606752 | 12 |
| 4286_s_at | YHR077C   | NMD2   | 7.021073 | 7.198045 | 6.832525 | 6.988362 | 6.981351 | 6.513189 | 6.560382 | 6.870689 | 6.445633 | 6.645686 | 6.82025  | 6.757574 | 6.416545 | 6.295488 | 6.132111 | 6.677126 | -0.172  | -0.00866  | 0.00404  | 0.000708 | 1.579226 | 16 |
| 4287_s_at | YHR209W   | CRG    | 5.429087 | 5.796234 | 5.411814 | 6.491432 | 6.468395 | 6.467071 | 5.978378 | 6.04135  | 6.422255 | 5.678835 | 6.193638 | 6.869033 | 7.179995 | 6.160268 | 6.277735 | 6.351724 | 0.101   | -0.145    | 0.0456   | 0.005978 | 1.670177 | 12 |
| 4310_at   | YHR196W   | UTP9   | 7.226117 | 7.310771 | 7.035958 | 6.49319  | 6.601238 | 6.239136 | 6.389602 | 6.50553  | 5.985203 | 6.120693 | 5.760077 | 5.561246 | 6.830285 | 6.613421 | 6.252363 | 5.999194 | -0.19   | 0.244     | 5.89E-05 | 1.98E-05 | 2.447307 | 14 |
| 4311_at   | YHR197W   | RX11   | 8.099515 | 8.199365 | 7.44732  | 6.947484 | 7.145465 | 7.315768 | 6.773119 | 7.301052 | 6.754079 | 6.106546 | 6.006507 | 5.539768 | 6.858336 | 5.421792 | 5.416863 | 6.529292 | -0.685  | 0.1       | 5.08E-07 | 5.19E-07 | 5.829664 | 18 |
| 4312_at   | YHR198C   | FMP22  | 4.148428 | 4.484955 | 3.861832 | 5.56324  | 5.540106 | 5.502085 | 5.99899  | 5.700927 | 6.016767 | 5.762424 | 5.889691 | 6.822833 | 5.247026 | 5.326246 | 5.579684 | 6.148613 | 0.312   | -0.376    | 3.91E-06 | 2.33E-06 | 4.097844 | 10 |
| 4313_at   | YHR199C   | FMP34  | 9.621787 | 9.855129 | 9.930272 | 10.5003  | 10.39076 | 10.69465 | 10.76368 | 10.82881 | 10.91129 | 10.77187 | 10.92057 | 11.44211 | 10.97625 | 11.15225 | 11.1559  | 10.99109 | 0.332   | -0.149    | 1.96E-06 | 1.39E-06 | 4.243902 | 9  |
| 4314_at   | YHR200W   | RPN10  | 9.4307   | 9.727271 | 9.618834 | 9.939831 | 9.723581 | 10.01533 | 9.557461 | 9.978585 | 9.671999 | 9.655021 | 10.10565 | 10.03616 | 9.64416  | 9.869563 | 9.793795 | 9.891674 | 0.0456  | -0.0561   | 0.134    | 0.015646 | 1.226369 | 13 |
| 4315_at   | YHR201C   | PPX1   | 8.017033 | 8.201751 | 7.931958 | 7.624161 | 7.79433  | 7.595028 | 7.545716 | 7.344723 | 7.258104 | 6.804469 | 6.69821  | 6.441766 | 6.027568 | 6.582196 | 5.812245 | 7.031181 | -0.531  | 0.0216    | 4.05E-07 | 4.43E-07 | 4.048881 | 18 |
| 4316_at   | YHR202W   |        | 8.554564 | 8.415828 | 6.862915 | 8.74798  | 8.827011 | 8.449311 | 10.02973 | 9.660952 | 9.448859 | 10.18357 | 10.00358 | 9.720078 | 6.895075 | 9.213563 | 9.787623 | 9.757398 | 0.3     | -0.376    | 0.00121  | 0.00025  | 4.019643 | 10 |
| 4317_at   | YHR204W   | MNL1   | 7.932166 | 8.177699 | 8.071115 | 7.72103  | 7.778387 | 7.945704 | 7.522395 | 7.746325 | 7.416672 | 7.503277 | 7.510625 | 7.615253 | 7.732824 | 8.166348 | 8.085011 | 7.565299 | -0.0281 | 0.129     | 0.000989 | 0.000211 | 1.429249 | 13 |
| 4318_at   | YHR205W   | SCH9   | 6.556931 | 6.6792   | 6.6792   | 7.03175  | 6.76487  | 6.648684 | 6.323737 | 7.365533 | 7.43107  | 8.408727 | 8.027277 | 8.54408  | 8.095766 | 7.961462 | 8.414032 | 7.789436 | 0.529   | -0.15     | 2.33E-05 | 9.27E-06 | 4.067467 | 7  |
| 4319_at   | YHR206W   | SKN7   | 7.952099 | 7.620193 | 6.601767 | 7.650455 | 7.273852 | 7.615635 | 8.170004 | 8.312811 | 8.324736 | 9.06805  | 8.810198 | 9.040507 | 10.1743  | 9.920049 | 10.59718 | 8.567944 | 0.766   | 0.0596    | 7.05E-07 | 6.50E-07 | 6.710781 | 6  |
| 4320_at   | YHR207C   | SET5   | 7.683042 | 7.989083 | 7.809044 | 6.942405 | 7.036402 | 6.857903 | 7.249831 | 7.242194 | 6.868781 | 7.146308 | 6.956095 | 6.684304 | 6.465741 | 6.782505 | 6.645964 | 6.87555  | -0.275  | 0.0836    | 0.000112 | 3.35E-05 | 2.071596 | 16 |
| 4321_at   | YHR208W   | BAT1   | 10.38157 | 10.59102 | 10.63793 | 10.0906  | 10.04347 | 10.27534 | 10.33304 | 10.37397 | 10.68619 | 9.701058 | 9.645851 | 10.20304 | 8.10957  | 8.053193 | 8.924343 | 10.04076 | -0.545  | -0.167    | 1.67E-06 | 1.24E-06 | 4.244638 | 17 |
| 4322_at   | YHR210C   |        | 6.214684 | 6.039566 | 5.033428 | 6.683079 | 6.701242 | 6.31426  | 6.805297 | 6.494442 | 6.596352 | 6.275322 | 6.077655 | 6.155601 | 5.628563 | 5.388995 | 5.744044 | 6.510213 | -0.0921 | -0.223    | 0.00373  | 0.00066  | 1.95788  | 12 |
| 4323_f_at | YHR216W   | IMD2   | 10.2508  | 10.18235 | 9.785377 | 9.144847 | 9.352534 | 9.17138  | 8.384567 | 8.742055 | 8.309273 | 7.694903 | 7.703189 | 7.818894 | 7.624433 | 7.933702 | 7.762372 | 8.126141 | -0.642  | 0.226     | 6.8E-08  | 1.32E-07 | 4.585994 | 18 |
| 4324_s_at | YHR218W   |        | 6.277627 | 6.579685 | 5.256268 | 6.108405 | 5.420281 | 5.447356 | 6.653499 | 7.027313 | 6.470774 | 6.83346  | 5.635396 | 6.561933 | 5.185292 | 6.08545  | 6.004897 | 5.205387 | 0.0417  | -0.0495   | 0.868    | 0.083549 | 1.505977 | 13 |
| 4325_at   | YHL046w-a |        | 3.028079 | 3.11126  | 2.590717 | 3.286404 | 3.343164 | 3.641006 | 3.159234 | 3.223501 | 3.176359 | 3.02861  | 3.008142 | 2.937622 | 3.108862 | 2.927502 | 3.082287 | 3.159275 | 0.00293 | -0.0463   | 0.307    | 0.032861 | 1.123821 | 13 |
| 4326_at   | YHL030w-a |        | 5.499557 | 5.594409 | 4.675687 | 5.239022 | 5.271147 | 5.193577 | 5.478099 | 5.179802 | 5.309957 | 5.131005 | 5.044537 | 4.753884 | 4.890502 | 5.001009 | 4.971707 | 5.143887 | -0.0973 | -0.00937  | 0.178    | 0.020153 | 1.294337 | 13 |
| 4327_at   | YHL006w-a |        | 3.646772 | 3.673743 | 3.173953 | 3.776744 | 3.873479 | 4.028908 | 3.956808 | 3.785938 | 3.591306 | 4.195579 | 3.844548 | 3.812425 | 3.679304 | 3.59216  | 3.615877 | 3.926928 | 0.0336  | -0.098    | 0.0194   | 0.00279  | 1.33785  | 13 |
| 4328_at   | YHL002c-a |        | 5.266143 | 5.111069 | 4.5717   | 5.20843  | 5.055745 | 4.849358 | 5.160715 | 4.935091 | 4.910607 | 5.274042 | 5.2333   | 4.767524 | 5.404477 | 5.130442 | 5.61929  | 5.067432 | 0.0992  | 0.033     | 0.0944   | 0.011437 | 1.300921 | 13 |
| 4329_at   | YHR056w-a |        | 5.203344 | 4.910988 | 4.692286 | 4.937859 | 4.842392 | 4.828004 | 5.294882 | 4.928773 | 4.882984 | 5.096106 | 5.199381 | 4.871532 | 4.746417 | 4.563822 | 4.718916 | 5.002563 | -0.0488 | -0.057    | 0.0874   | 0.010684 | 1.24031  | 13 |
| 4330_at   | YHR063w-a |        | 5.391915 | 5.809    | 4.842412 | 4.682412 | 5.341641 | 5.161422 | 5.362085 | 4.975985 | 4.936636 | 4.831204 | 4.922058 | 4.604678 | 4.466883 | 4.53495  | 4.519176 | 4.886679 | -0.219  | 0.00636   | 0.00619  | 0.001027 | 1.788335 | 16 |
| 4331_at   | YHR070c-a |        | 2.938045 | 2.935706 | 2.704919 | 3.027625 | 3.168375 | 3.024064 | 2.928967 | 2.86217  | 2.685237 | 2.906506 | 2.738921 | 2.738921 | 2.902    |          |          |          |         |           |          |          |          |    |

|         |                 |          |          |          |          |          |          |           |          |          |          |          |          |          |          |          |          |          |          |          |          |          |    |
|---------|-----------------|----------|----------|----------|----------|----------|----------|-----------|----------|----------|----------|----------|----------|----------|----------|----------|----------|----------|----------|----------|----------|----------|----|
| 4363_at | YHR158C KEL1    | 5.146048 | 5.132901 | 4.408894 | 6.462815 | 4.765895 | 4.713312 | 4.65833   | 4.750904 | 5.012624 | 4.660326 | 4.995428 | 5.206755 | 4.92669  | 5.18012  | 4.947012 | 4.83463  | 0.051    | 0.0306   | 0.411    | 0.042636 | 1.173343 | 13 |
| 4364_at | YHR159W         | 5.443593 | 5.765797 | 5.48753  | 5.637736 | 5.750621 | 5.965676 | 5.812921  | 5.986127 | 5.832415 | 5.838321 | 5.926989 | 5.755454 | 5.481643 | 5.734669 | 5.553881 | 5.871454 | 0.00466  | -0.0805  | 0.00668  | 0.001098 | 1.2241   | 13 |
| 4365_at | YHR160C PEX18   | 4.245622 | 4.272674 | 3.958445 | 5.005563 | 5.020346 | 4.896276 | 5.139148  | 5.563718 | 5.257634 | 5.323984 | 5.490848 | 5.420437 | 4.858243 | 5.441084 | 4.886776 | 5.420701 | 0.23     | -0.222   | 6.33E-06 | 3.37E-06 | 2.477456 | 9  |
| 4366_at | YHR161C YAP1801 | 8.38804  | 8.489223 | 7.945623 | 8.106522 | 8.130631 | 8.013766 | 8.147252  | 8.257634 | 8.289769 | 8.060588 | 8.164218 | 8.802131 | 8.282488 | 8.679528 | 8.112871 | 8.083988 | 0.0115   | 0.0634   | 0.196    | 0.02197  | 1.176972 | 13 |
| 4367_at | YHR162W         | 11.22399 | 11.37843 | 11.55319 | 10.89024 | 11.12558 | 11.32261 | 11.14394  | 11.33003 | 11.18293 | 11.13409 | 11.27588 | 11.47467 | 11.07128 | 11.20847 | 11.54248 | 11.19923 | -0.00913 | 0.0326   | 0.58     | 0.058148 | 1.079583 | 13 |
| 4368_at | YHR163W SOL3    | 10.24668 | 10.22705 | 10.15076 | 9.463943 | 9.273547 | 9.72218  | 9.055977  | 9.925076 | 8.991644 | 7.911774 | 8.222963 | 8.102296 | 9.522105 | 9.579966 | 9.332197 | 8.565468 | -0.273   | 0.36     | 3.82E-05 | 1.38E-05 | 3.075883 | 14 |
| 4369_at | YHR164C DNA2    | 3.98805  | 3.998272 | 3.695288 | 4.109331 | 4.170913 | 4.417241 | 4.024286  | 4.286945 | 4.116886 | 4.324812 | 4.380054 | 4.317504 | 4.195193 | 4.201614 | 4.204381 | 4.294951 | 0.0799   | -0.0666  | 0.00321  | 0.000579 | 1.336075 | 13 |
| 4370_at | YHR165C PRP8    | 7.20562  | 7.157861 | 6.344178 | 6.47099  | 6.601357 | 6.473244 | 6.80808   | 6.877198 | 6.726476 | 6.960596 | 6.849907 | 6.569996 | 8.523058 | 8.016904 | 7.863946 | 6.724927 | 0.314    | 0.216    | 2.75E-05 | 1.06E-05 | 2.828601 | 8  |
| 4371_at | YHR166C CDC23   | 3.824134 | 4.058461 | 3.774898 | 3.833521 | 3.86415  | 3.953041 | 3.900257  | 3.879642 | 3.694169 | 3.957577 | 3.942976 | 3.956259 | 4.082822 | 4.336973 | 4.041302 | 3.896883 | 0.0716   | 0.0339   | 0.00596  | 0.000992 | 1.229463 | 13 |
| 4372_at | YHR167W THP2    | 5.35623  | 5.345506 | 5.148069 | 5.169969 | 5.192179 | 5.216714 | 5.224606  | 5.29352  | 5.193224 | 5.20441  | 5.397271 | 5.101177 | 5.106958 | 4.530311 | 4.889921 | 5.208453 | -0.101   | -0.0417  | 0.00847  | 0.001345 | 1.321131 | 13 |
| 4373_at | YHR168W MTG2    | 6.389271 | 6.181992 | 5.832568 | 6.276848 | 6.378107 | 6.362291 | 6.386252  | 6.643349 | 6.41968  | 6.634125 | 6.293111 | 6.036545 | 7.505654 | 6.748365 | 6.630717 | 6.427195 | 0.187    | 0.0355   | 0.0193   | 0.002773 | 1.640386 | 13 |
| 4374_at | YHR169W DBP8    | 7.592436 | 7.627472 | 7.381267 | 7.22408  | 7.451115 | 7.121879 | 7.531085  | 7.706584 | 7.272694 | 7.966144 | 7.793594 | 7.159359 | 6.430388 | 6.639972 | 6.075778 | 7.467266 | -0.243   | -0.148   | 0.00172  | 0.000338 | 2.146623 | 15 |
| 4375_at | YHR170W NMD3    | 9.054801 | 9.082287 | 8.070472 | 8.275105 | 8.527484 | 8.237188 | 8.374519  | 8.909736 | 8.10331  | 8.615984 | 8.160134 | 7.711164 | 7.520962 | 7.564882 | 7.062531 | 8.233533 | -0.335   | -0.0512  | 0.00222  | 0.000421 | 2.429659 | 16 |
| 4376_at | YHR171W ATG7    | 5.58679  | 5.766606 | 4.651391 | 5.635092 | 5.788945 | 5.312693 | 5.886784  | 5.996908 | 5.713888 | 5.510776 | 5.586319 | 5.373766 | 5.588411 | 5.521465 | 5.313744 | 5.680978 | 0.00987  | -0.0762  | 0.366    | 0.03843  | 1.221434 | 13 |
| 4377_at | YHR172W SPC97   | 6.590439 | 5.783373 | 5.242035 | 5.563075 | 5.547578 | 5.415175 | 5.087652  | 5.156714 | 5.104866 | 5.018405 | 5.037263 | 4.863819 | 4.996109 | 5.111895 | 5.202209 | 5.103261 | -0.145   | 0.0693   | 0.00367  | 0.00065  | 1.494456 | 16 |
| 4378_at | YHR129C ARP1    | 4.752229 | 4.975836 | 4.633267 | 4.779816 | 4.748349 | 4.809361 | 4.45869   | 4.571005 | 4.518297 | 4.701833 | 4.523816 | 4.244202 | 5.445667 | 4.806297 | 4.797434 | 4.553336 | 0.0367   | 0.0955   | 0.038    | 0.005077 | 1.338941 | 13 |
| 4379_at | YHR130C         | 5.453164 | 5.684052 | 5.536144 | 5.706352 | 5.459488 | 5.398355 | 5.512389  | 5.7833   | 5.517729 | 5.491447 | 5.744555 | 6.019    | 6.586361 | 6.3578   | 6.138551 | 5.668162 | 0.223    | 0.0877   | 1.64E-05 | 6.97E-06 | 1.838535 | 8  |
| 4380_at | YHR131C         | 6.687904 | 6.584342 | 5.232702 | 6.208888 | 6.363029 | 6.291921 | 6.761193  | 6.844376 | 6.786795 | 6.471463 | 6.872652 | 6.570239 | 6.67465  | 6.091188 | 6.479091 | 6.657365 | 0.0722   | -0.104   | 0.247    | 0.026915 | 1.444991 | 13 |
| 4381_at | YHR132C ECM14   | 8.707657 | 8.575891 | 8.068848 | 8.844503 | 8.943805 | 8.770573 | 9.480455  | 9.428381 | 9.216228 | 9.546953 | 8.46766  | 8.354058 | 8.613335 | 8.769776 | 8.419677 | 9.373275 | 0.0669   | -0.238   | 0.00017  | 4.74E-05 | 1.974899 | 12 |
| 4382_at | YHR133C NSG1    | 9.728494 | 9.491992 | 8.810741 | 8.692392 | 8.834379 | 8.392669 | 8.634958  | 8.805823 | 8.450203 | 8.107862 | 8.261833 | 8.789743 | 8.047451 | 7.926932 | 7.69612  | 8.274246 | -0.381   | 0.0941   | 2.93E-05 | 1.12E-05 | 2.74315  | 16 |
| 4383_at | YHR134W WSS1    | 4.985502 | 4.711001 | 4.576921 | 4.679096 | 4.876314 | 4.829707 | 4.691457  | 5.04978  | 4.802209 | 4.997703 | 4.705201 | 4.865559 | 4.464177 | 4.373025 | 4.492873 | 4.801622 | -0.0799  | -0.0557  | 0.0116   | 0.001772 | 1.304968 | 13 |
| 4384_at | YHR135C YCK1    | 9.189003 | 9.064043 | 8.794611 | 8.790019 | 8.924481 | 8.746011 | 8.857576  | 8.761697 | 8.984199 | 8.618874 | 8.845311 | 8.587275 | 8.598075 | 8.91401  | 8.646805 | 8.747146 | -0.0809  | 0.0327   | 0.0298   | 0.004089 | 1.239298 | 13 |
| 4385_at | YHR136C SPL2    | 3.255695 | 3.272656 | 2.841109 | 3.482992 | 3.212509 | 3.447439 | 3.124811  | 3.366381 | 3.373739 | 3.67603  | 3.382183 | 3.425405 | 4.621138 | 4.766308 | 4.616464 | 3.461298 | 0.375    | 0.123    | 5.42E-07 | 5.41E-07 | 2.699859 | 8  |
| 4386_at | YHR137W ARO9    | 4.94557  | 4.851975 | 4.667292 | 5.625618 | 5.805674 | 4.448020 | 4.147785  | 5.395502 | 5.763926 | 5.690234 | 5.511798 | 5.43834  | 5.183065 | 5.410457 | 5.49805  | 5.823815 | 0.0985   | -0.197   | 0.00108  | 0.000227 | 1.885482 | 12 |
| 4387_at | YHR138C         | 10.20157 | 10.29757 | 10.32833 | 11.22353 | 11.34694 | 11.49221 | 11.87563  | 11.92732 | 11.67041 | 12.13483 | 12.00664 | 12.07076 | 11.78034 | 11.85845 | 11.99163 | 12.01845 | 0.412    | -0.259   | 1.07E-09 | 1.05E-08 | 3.628845 | 10 |
| 4388_at | YHR139C SPS100  | 7.214009 | 6.87779  | 7.174987 | 7.843578 | 7.354469 | 7.792605 | 8.576998  | 8.385413 | 7.788465 | 8.202054 | 8.297294 | 7.968494 | 9.001497 | 8.440744 | 9.426958 | 8.212448 | 0.459    | -0.0519  | 0.000174 | 4.83E-05 | 3.375897 | 7  |
| 4389_at | YHR139C-A       | 3.274312 | 3.214466 | 2.861964 | 3.603434 | 3.555798 | 3.378459 | 3.162493  | 3.264701 | 3.185374 | 3.125563 | 3.097749 | 3.118426 | 3.225537 | 3.330948 | 3.509311 | 3.270979 | 0.024    | -0.00298 | 0.847    | 0.001754 | 1.065664 | 13 |
| 4390_at | YHR140W         | 4.545726 | 4.489314 | 4.426105 | 4.761022 | 4.615994 | 4.974791 | 4.7153491 | 4.832359 | 4.125335 | 4.277913 | 4.194199 | 3.870065 | 4.297275 | 4.392768 | 4.767234 | 4.745434 | 0.581    | -0.476   | 1.27E-05 | 5.72E-06 | 8.060653 | 10 |
| 4391_at | YHR142W CHS7    | 7.411024 | 7.534971 | 7.172543 | 6.853881 | 6.872249 | 6.939888 | 6.257356  | 6.512986 | 6.579901 | 6.193025 | 6.135177 | 6.012666 | 6.595727 | 5.9185   | 5.989535 | 6.359703 | -0.375   | 0.0824   | 4.07E-07 | 4.43E-07 | 2.700241 | 16 |
| 4392_at | YHR143W DSE2    | 4.930549 | 5.206028 | 8.309063 | 9.585127 | 9.557248 | 8.95523  | 9.133247  | 9.187212 | 9.274351 | 7.391735 | 7.885902 | 8.204726 | 7.655837 | 7.788924 | 8.096343 | 8.637648 | -0.408   | -0.0485  | 0.00888  | 0.001399 | 2.950117 | 16 |
| 4393_at | YHR143W RCP10   | 8.374487 | 8.701703 | 8.704113 | 7.971388 | 7.925973 | 8.352792 | 8.003982  | 7.902875 | 7.754954 | 7.948153 | 7.959576 | 8.378601 | 7.343712 | 7.165408 | 7.5732   | 7.927508 | -0.277   | 0.00951  | 0.000866 | 0.000188 | 2.083674 | 16 |
| 4394_at | YHR144C DCD1    | 8.242803 | 8.041699 | 7.557384 | 7.372124 | 7.269758 | 7.121656 | 6.998347  | 7.223519 | 6.728001 | 6.513202 | 6.607162 | 5.881475 | 5.272815 | 5.107356 | 5.215093 | 6.625471 | -0.728   | -0.012   | 4.59E-08 | 1.03E-07 | 8.894704 | 18 |
| 4395_at | YHR145C         | 5.164235 | 5.099253 | 4.896527 | 5.456533 | 5.425148 | 5.241523 | 5.12884   | 5.243041 | 5.146727 | 5.334309 | 5.430142 | 5.105445 | 5.370706 | 5.142445 | 5.247078 | 5.300985 | 0.0418   | -0.0376  | 0.159    | 0.018236 | 1.171289 | 13 |
| 4396_at | YHR146W CRP1    | 7.421718 | 8.283094 | 8.164988 | 7.802094 | 7.738678 | 7.484535 | 7.951526  | 8.115493 | 7.960497 | 9.08937  | 8.70407  | 8.453141 | 9.97573  | 9.564297 | 9.668433 | 8.281994 | 0.514    | 0.148    | 5.85E-06 | 3.16E-06 | 3.910526 | 7  |
| 4397_at | YHR147C MRPL6   | 7.957892 | 7.670075 | 6.862292 | 8.410115 | 8.709396 | 7.950139 | 8.679041  | 8.418723 | 8.22426  | 8.283281 | 7.834    | 8.234387 | 9.628968 | 9.644465 | 6.43229  | 8.371713 | -0.249   | -0.359   | 1.95E-05 | 8.00E-06 | 3.504509 | 15 |
| 4398_at | YHR148W IMP3    | 6.990428 | 6.548812 | 5.464515 | 6.045476 | 6.47367  | 5.547494 | 6.584996  | 6.636784 | 6.794411 | 6.786038 | 5.996429 | 5.255549 | 5.076823 | 4.693789 | 4.544624 | 6.068913 | -0.376   | -0.147   | 0.00745  | 0.001205 | 2.787892 | 15 |
| 4399_at | YHR149C SKG6    | 5.87692  | 5.658877 | 4.958721 | 5.445896 | 5.665707 | 5.160806 | 4.973453  | 5.118429 | 4.958394 | 4.547026 | 4.429749 | 4.78725  | 3.668785 | 4.201382 | 3.78712  | 4.856915 | -0.444   | -0.0405  | 1.98E-05 | 8.12E-06 | 3.246459 | 16 |
| 4400_at | YHR150W PEX28   | 5.240402 | 4.993371 | 4.458922 | 5.471399 | 5.391457 | 4.920418 | 5.776369  | 5.735147 | 5.636087 | 5.876875 | 5.779127 | 5.815155 | 5.984443 | 5.617297 | 6.043325 | 5.749548 | 0.262    | -0.103   | 0.000492 | 0.000117 | 2.002599 | 9  |
| 4401_at | YHR108W GGA2    | 7.789648 | 8.080282 | 7.48439  | 7.536082 | 7.571254 | 7.525708 | 7.377369  | 7.898964 | 7.298507 | 6.855381 | 7.119924 | 7.387825 | 6.104245 | 6.465679 | 6.366848 | 7.224773 | -0.385   | -0.0519  | 1.34E-06 | 1.06E-06 | 2.774779 | 16 |
| 4402_at | YHR109W CTM1    | 4.410101 | 4.726677 | 3.786216 | 4.914652 | 5.062125 | 4.944799 | 4.807896  | 4.900311 | 4.96639  | 4.532134 | 4.700178 | 4.744627 | 4.105851 | 4.042958 | 4.130211 | 4.88041  | -0.0872  | -0.182   | 0.000901 | 0.000195 | 1.764003 | 12 |
| 4403_at | YHR110W ERP5    | 6.267421 | 6.924643 | 7.144624 | 7.096029 | 7.001961 | 7.338564 | 7.094365  | 7.005124 | 7.102427 | 6.882386 | 7.058229 | 7.2253   | 6.09414  | 6.032354 | 6.178164 | 7.106397 | -0.123   | -0.154   | 0.00463  | 0.0008   | 1.762636 | 12 |
| 4404_at | YHR111          |          |          |          |          |          |          |           |          |          |          |          |          |          |          |          |          |          |          |          |          |          |    |

|           |         |        |          |          |          |          |          |          |          |          |          |          |          |          |          |          |          |          |         |          |          |          |          |    |
|-----------|---------|--------|----------|----------|----------|----------|----------|----------|----------|----------|----------|----------|----------|----------|----------|----------|----------|----------|---------|----------|----------|----------|----------|----|
| 4435_at   | YHR098C | SFB3   | 8.213982 | 8.137431 | 7.515981 | 7.689029 | 7.705886 | 7.699846 | 7.461605 | 7.637328 | 7.421467 | 7.101194 | 7.504216 | 7.631857 | 6.805795 | 7.004074 | 7.264623 | 7.447628 | -0.236  | 0.0117   | 0.000801 | 0.000175 | 1.871416 | 16 |
| 4436_at   | YHR099W | TRA1   | 6.801392 | 7.045347 | 6.221431 | 6.221088 | 6.196744 | 6.234438 | 5.767017 | 6.022904 | 6.033996 | 5.4702   | 6.04197  | 6.076496 | 8.254027 | 6.867689 | 7.806779 | 5.913748 | 0.21    | 0.348    | 0.000184 | 5.06E-05 | 3.198875 | 8  |
| 4437_at   | YHR100C |        | 5.672519 | 6.018549 | 6.214871 | 6.351667 | 6.427802 | 6.500377 | 6.250472 | 6.264801 | 6.343446 | 6.372544 | 6.816652 | 7.459004 | 6.478079 | 6.38894  | 6.36489  | 6.642999 | 0.143   | -0.125   | 0.0189   | 0.002728 | 1.703786 | 9  |
| 4438_at   | YHR101C | BIG1   | 7.180337 | 7.162611 | 6.67677  | 6.81959  | 6.620686 | 6.690687 | 7.059154 | 7.2175   | 7.171206 | 7.398592 | 7.891202 | 7.70199  | 7.398592 | 7.733955 | 8.055238 | 7.295127 | 0.293   | 0.0392   | 0.000511 | 0.00012  | 2.170511 | 7  |
| 4439_at   | YHR101C | BIG1   | 4.693828 | 4.428798 | 3.496315 | 4.076224 | 3.903483 | 4.154644 | 3.957708 | 4.662853 | 4.823222 | 4.566664 | 4.933686 | 4.735856 | 5.193973 | 4.920939 | 5.3612   | 4.522298 | 0.278   | 0.0379   | 0.000843 | 0.001342 | 2.088574 | 7  |
| 4440_at   | YHR102W | KIC1   | 6.369794 | 6.500764 | 6.104316 | 6.521945 | 6.421672 | 6.484922 | 6.759018 | 6.900235 | 6.585245 | 6.81325  | 7.395601 | 6.93838  | 7.046768 | 6.867927 | 7.113616 | 6.867897 | 0.205   | -0.0578  | 0.000704 | 0.00157  | 1.720589 | 9  |
| 4441_at   | YHR103W | SBE22  | 6.281772 | 6.443547 | 5.638057 | 6.301434 | 6.330569 | 5.948924 | 6.728646 | 6.890752 | 6.384912 | 7.201561 | 7.381085 | 7.553788 | 7.382082 | 7.47846  | 7.474933 | 6.938735 | 0.405   | -0.0513  | 0.000198 | 5.39E-05 | 2.923827 | 7  |
| 4442_at   | YHR104W | GRE3   | 7.349863 | 7.623704 | 7.340489 | 8.901017 | 7.962625 | 9.007055 | 9.424381 | 9.328218 | 9.505431 | 8.233263 | 8.5902   | 9.048932 | 7.405474 | 7.434615 | 8.008269 | 9.159314 | -0.0222 | -0.441   | 6.82E-05 | 2.23E-05 | 2.974586 | 11 |
| 4443_at   | YHR105W | YPT35  | 4.755157 | 3.905228 | 3.137488 | 3.89124  | 3.622128 | 3.955833 | 3.894827 | 5.176559 | 4.999497 | 4.004096 | 4.790236 | 4.095632 | 4.355904 | 3.83923  | 3.937801 | 4.352621 | 0.0437  | -0.107   | 0.512    | 0.051912 | 1.390256 | 13 |
| 4444_at   | YHR106W | TRR2   | 9.137946 | 8.946231 | 8.897586 | 9.495417 | 9.442072 | 9.509765 | 10.03555 | 10.13622 | 9.803886 | 9.510732 | 9.352959 | 9.636485 | 9.068144 | 9.304227 | 9.154231 | 9.747891 | 0.0209  | -0.182   | 0.00184  | 0.000359 | 1.604424 | 12 |
| 4445_at   | YHR107C | CDC12  | 5.613707 | 6.14285  | 5.551736 | 5.447601 | 5.068097 | 5.33968  | 5.101655 | 5.650291 | 5.226891 | 5.018202 | 5.30392  | 5.37599  | 4.760113 | 4.953776 | 4.648546 | 5.198021 | -0.231  | 0.0183   | 0.00159  | 0.000317 | 1.8456   | 16 |
| 4446_at   | YHR065C | RRP3   | 7.327773 | 7.486886 | 6.291505 | 6.367491 | 6.845444 | 6.136942 | 6.505004 | 6.898131 | 6.145985 | 6.031575 | 5.501797 | 4.56176  | 4.324605 | 4.05875  | 3.915075 | 5.859335 | -0.787  | -0.08    | 1.05E-05 | 4.92E-06 | 8.048809 | 18 |
| 4447_at   | YHR066W | SSF1   | 6.589236 | 7.180027 | 7.274983 | 6.301338 | 6.842732 | 6.441134 | 6.488575 | 6.710346 | 6.149186 | 6.673537 | 5.908499 | 5.23161  | 5.005719 | 5.439064 | 5.019363 | 6.137616 | -0.484  | -0.0152  | 0.00014  | 4.02E-05 | 3.580191 | 18 |
| 4448_at   | YHR067W | HTD2   | 4.435096 | 4.487238 | 3.808646 | 5.024548 | 5.048425 | 4.798509 | 5.422489 | 5.581269 | 5.569976 | 5.003419 | 5.329566 | 5.521336 | 4.287986 | 3.992265 | 4.637731 | 5.409034 | 0.0152  | -0.313   | 7.95E-05 | 2.52E-05 | 2.185325 | 12 |
| 4449_at   | YHR068W | DYS1   | 10.63403 | 10.88871 | 10.77353 | 10.08225 | 10.05959 | 10.16343 | 10.00444 | 10.13386 | 9.886943 | 9.15342  | 9.536511 | 9.97706  | 8.757893 | 8.65061  | 9.30573  | 9.703356 | -0.477  | 0.0344   | 1.43E-06 | 1.12E-06 | 3.540839 | 18 |
| 4450_at   | YHR069C | RRP4   | 6.400685 | 6.500466 | 6.127581 | 6.216067 | 6.482342 | 6.169731 | 6.573436 | 6.59933  | 6.347795 | 6.462401 | 6.413521 | 6.294198 | 5.5548   | 5.33091  | 5.367897 | 6.392757 | -0.211  | -0.142   | 9.98E-06 | 4.75E-06 | 1.997502 | 15 |
| 4451_at   | YHR070W | TRM5   | 7.683308 | 7.332906 | 6.004807 | 6.477569 | 6.674783 | 6.739997 | 6.624278 | 7.512647 | 7.191243 | 6.618782 | 6.471823 | 6.847309 | 5.803051 | 5.294333 | 5.414934 | 6.626939 | -0.388  | -0.106   | 0.00458  | 0.000792 | 2.974782 | 15 |
| 4452_at   | YHR071W | PCL5   | 4.742366 | 8.94821  | 8.156116 | 9.511487 | 9.251187 | 9.833127 | 10.09332 | 9.807743 | 10.17526 | 10.00023 | 10.14284 | 10.74446 | 9.419835 | 9.120253 | 9.738474 | 10.22757 | 0.222   | -0.332   | 2.29E-05 | 9.14E-06 | 3.19039  | 10 |
| 4453_at   | YHR072W | ERG7   | 8.766191 | 8.770104 | 8.520644 | 9.134762 | 9.62625  | 9.28622  | 9.198465 | 9.107886 | 8.685082 | 9.345106 | 8.85776  | 8.842884 | 7.546602 | 7.295041 | 7.034837 | 8.933021 | -0.339  | -0.262   | 4.97E-05 | 1.72E-05 | 3.279474 | 17 |
| 4454_at   | YHR073W | OSH3   | 3.861696 | 3.955591 | 3.568474 | 3.905707 | 4.113487 | 3.931041 | 4.146091 | 4.186946 | 3.856847 | 3.659981 | 3.895838 | 3.931113 | 3.625982 | 3.76809  | 3.776223 | 3.962736 | -0.0352 | -0.0555  | 0.0928   | 0.011262 | 1.207092 | 13 |
| 4455_at   | YHR074W | QNS641 | 5.005641 | 6.124523 | 5.9639   | 5.728092 | 6.220878 | 6.311551 | 6.48215  | 6.009104 | 6.260885 | 6.059765 | 6.45522  | 5.32448  | 5.451301 | 6.071791 | 6.161495 | -0.0934  | -0.0986 | 0.0383   | 0.005103 | 1.474399 | 12       |    |
| 4456_at   | YHR075C | PPE1   | 7.044691 | 7.209604 | 6.876881 | 6.98512  | 7.065435 | 6.782756 | 7.488767 | 7.516652 | 7.304621 | 7.255891 | 7.040796 | 6.918571 | 6.372629 | 6.651915 | 6.377394 | 7.164667 | -0.139  | -0.117   | 0.00177  | 0.000346 | 1.663608 | 15 |
| 4457_at   | YHR076W | PTC7   | 7.449079 | 7.624627 | 7.229794 | 7.250043 | 7.401376 | 7.346107 | 7.448674 | 7.383578 | 7.187013 | 6.75217  | 6.875267 | 7.036632 | 5.992577 | 6.472615 | 6.15919  | 7.099895 | -0.329  | -0.0758  | 6.19E-07 | 5.98E-07 | 2.394918 | 16 |
| 4458_at   | YHR078W |        | 7.990087 | 7.988303 | 7.263926 | 8.369602 | 8.180767 | 7.944952 | 8.887996 | 8.191912 | 8.667843 | 9.307582 | 9.128323 | 9.309726 | 7.976463 | 8.356883 | 8.30156  | 8.993546 | 0.189   | -0.281   | 0.000333 | 8.33E-05 | 2.670702 | 9  |
| 4459_at   | YHR079C | IRE1   | 5.186355 | 5.104436 | 3.918289 | 5.186675 | 5.252111 | 4.848541 | 5.413402 | 5.38317  | 5.14848  | 5.103762 | 5.259195 | 5.416247 | 4.649522 | 4.970625 | 4.663364 | 5.297255 | 0.00809 | -0.151   | 0.0468   | 0.00612  | 1.467062 | 12 |
| 4460_i_at | YHR079C | SAE3   | 2.861546 | 3.225394 | 3.205142 | 3.353428 | 3.210799 | 3.211291 | 2.814652 | 2.932128 | 2.953114 | 3.044199 | 2.672034 | 3.001797 | 2.878556 | 2.879441 | 2.844754 | 2.980196 | -0.0775 | 0.00501  | 0.134    | 0.015693 | 1.228205 | 10 |
| 4461_r_at | YHR079C | SAE3   | 3.504009 | 3.94781  | 3.22674  | 3.57855  | 3.554137 | 3.801453 | 3.805383 | 3.948272 | 3.776924 | 4.08138  | 3.724674 | 3.767419 | 4.42663  | 3.450117 | 3.859946 | 3.83295  | 0.0952  | -0.028   | 0.242    | 0.026518 | 1.28723  | 13 |
| 4462_at   | YHR080C |        | 6.399059 | 6.598378 | 6.13891  | 6.668604 | 6.658281 | 6.194366 | 7.126245 | 6.852487 | 6.764309 | 6.586431 | 6.718782 | 6.89187  | 6.87254  | 6.619547 | 6.270404 | 6.626939 | 0.0768  | -0.113   | 0.0443   | 0.005822 | 1.486112 | 13 |
| 4463_at   | YHR081W | LRP1   | 6.4166   | 6.619794 | 5.981787 | 5.813455 | 6.147222 | 5.811059 | 5.999206 | 6.020192 | 5.485147 | 5.485147 | 5.951162 | 5.765351 | 6.900605 | 5.98264  | 6.26163  | 5.87647  | 0.0461  | 0.128    | 0.128    | 0.015031 | 1.452051 | 13 |
| 4464_at   | YHR082C | KSP1   | 7.014908 | 7.054579 | 5.928088 | 7.006844 | 7.182077 | 7.016068 | 7.62855  | 7.602997 | 7.625117 | 7.775181 | 7.775181 | 8.618792 | 8.966437 | 8.329581 | 9.137197 | 7.800737 | 0.59    | -0.0238  | 4.42E-05 | 1.56E-05 | 4.87123  | 6  |
| 4465_at   | YHR083W | SAM35  | 5.337949 | 5.579037 | 5.207989 | 5.68861  | 5.740619 | 5.672317 | 5.722887 | 5.439792 | 5.420046 | 5.631003 | 5.386565 | 5.80695  | 6.078176 | 5.512332 | 5.574248 | 5.638444 | 0.0456  | -0.0381  | 0.474    | 0.04846  | 1.179966 | 13 |
| 4466_at   | YHR084W | STE12  | 5.039762 | 5.235966 | 4.630699 | 4.552092 | 4.519217 | 5.166452 | 5.578071 | 5.546983 | 5.253586 | 5.428785 | 5.11196  | 5.298152 | 6.325459 | 5.270311 | 5.555292 | 5.420648 | 0.162   | -0.018   | 0.0709   | 0.008871 | 1.535834 | 13 |
| 4467_at   | YHR085W | IP1    | 6.45828  | 6.391151 | 5.717755 | 6.011673 | 6.180556 | 5.609687 | 5.985726 | 5.96701  | 5.442959 | 5.855039 | 5.592738 | 5.162571 | 5.689417 | 5.257586 | 4.954282 | 6.556177 | -0.238  | 0.0253   | 0.00978  | 0.001524 | 1.88075  | 16 |
| 4468_at   | YHR086W | NAM8   | 7.87062  | 7.61633  | 6.327223 | 7.754822 | 7.791614 | 7.296483 | 7.559672 | 7.833563 | 7.644267 | 7.654078 | 7.666841 | 8.321693 | 6.930025 | 6.734364 | 6.792749 | 7.835168 | -0.0841 | -0.221   | 0.0139   | 0.002075 | 1.921197 | 12 |
| 4469_at   | YHR040W | BCD1   | 5.335395 | 5.571649 | 5.178411 | 5.144674 | 5.398198 | 5.389051 | 6.068225 | 6.302185 | 5.257472 | 6.333999 | 5.853969 | 5.076114 | 5.248326 | 5.298068 | 4.854155 | 5.713062 | -0.031  | -0.134   | 0.167    | 0.01903  | 1.435667 | 12 |
| 4470_at   | YHR041C | SRB2   | 7.968023 | 7.57981  | 7.637375 | 7.740413 | 7.361323 | 7.881462 | 6.801441 | 7.161809 | 7.078686 | 6.493194 | 7.176223 | 7.603625 | 6.383534 | 6.750413 | 6.694617 | 7.130386 | -0.295  | 0.0149   | 0.00432  | 0.000751 | 2.187547 | 16 |
| 4471_at   | YHR042W | NCP1   | 10.90243 | 10.9826  | 10.13487 | 10.66155 | 10.69509 | 10.60603 | 11.60375 | 11.14633 | 10.75486 | 11.52242 | 11.38665 | 11.65783 | 10.11273 | 10.8973  | 10.66484 | 11.23019 | 0.0346  | -0.178   | 0.0615   | 0.007815 | 1.626649 | 12 |
| 4472_s_at | YHR043C | DOG2   | 8.76006  | 8.616911 | 8.597057 | 8.717424 | 7.846987 | 8.758712 | 8.715714 | 8.594454 | 8.585534 | 7.869094 | 8.16401  | 6.90874  | 6.995063 | 7.387426 | 8.406227 | -0.423   | -0.143  | 4.89E-07 | 5.04E-07 | 3.069533 | 12       |    |
| 4473_i_at | YHR044C | DOG1   | 3.309443 | 4.376573 | 3.145689 | 4.590703 | 4.517638 | 4.522683 | 3.689756 | 3.331751 | 3.593043 | 4.043854 | 3.819593 | 3.580381 | 3.915057 | 3.377738 | 3.526354 | 3.844963 | -0.0234 | -0.0572  | 0.732    | 0.071805 | 1.187435 | 13 |
| 4474_at   | YHR045W |        | 9.185315 | 9.352568 | 7.93931  | 8.831689 | 9.111536 | 8.428935 | 8.688142 | 8.503692 | 8.411392 | 8.857911 | 7.891159 | 8.062865 | 7.381552 | 7.527755 | 7.158968 | 8.237769 | -0.48   | 0.00184  | 7.68E-07 | 6.89E-07 | 3.567767 | 18 |
| 4475_at   | YHR046C | INM1   | 6.995328 | 7.241559 | 7.578563 | 7.058957 | 7.121619 | 7.149405 | 7.467012 | 7.092384 | 6.852541 | 6.998662 | 6.745205 | 6.903808 |          |          |          |          |         |          |          |          |          |    |



|           |         |          |          |          |          |          |          |          |          |          |          |           |          |          |          |          |          |          |         |          |          |          |          |    |
|-----------|---------|----------|----------|----------|----------|----------|----------|----------|----------|----------|----------|-----------|----------|----------|----------|----------|----------|----------|---------|----------|----------|----------|----------|----|
| 4507_at   | YHR033W | 4.955078 | 4.641043 | 4.439996 | 5.46755  | 5.539705 | 5.677027 | 6.160323 | 6.852971 | 6.374359 | 6.215931 | 6.695589  | 6.603435 | 6.53948  | 6.207025 | 6.686814 | 6.472919 | 0.502    | -0.23   | 6.5E-06  | 4.3E-06  | 3.913072 | 10       |    |
| 4508_at   | YHR034C | PIH1     | 5.234392 | 5.454412 | 5.591336 | 5.880842 | 5.590352 | 5.894762 | 6.192837 | 6.164883 | 5.941788 | 6.198867  | 6.34463  | 6.176371 | 5.817046 | 6.204785 | 5.703108 | 6.182874 | 0.134   | -0.143   | 8.74E-05 | 2.73E-05 | 1.753763 | 9  |
| 4509_at   | YHR035W |          | 4.709211 | 4.822173 | 4.171452 | 4.545206 | 4.58377  | 4.582366 | 4.518719 | 4.700596 | 4.805406 | 4.622872  | 5.172078 | 4.924447 | 4.408457 | 4.249878 | 4.358729 | 4.753006 | -0.0264 | -0.0862  | 0.0946   | 0.011457 | 1.275648 | 13 |
| 4510_at   | YHR036W | BRL1     | 3.872263 | 4.155572 | 3.222445 | 4.021748 | 4.104462 | 3.851473 | 3.959158 | 5.405414 | 4.172524 | 4.230082  | 4.517773 | 4.172939 | 4.386837 | 4.40211  | 4.044468 | 4.205887 | 0.131   | -0.0528  | 0.053    | 0.006825 | 1.414579 | 13 |
| 4511_at   | YHR037W | PRT2     | 7.920304 | 8.078896 | 7.5131   | 9.480491 | 9.572091 | 9.017815 | 10.41608 | 10.14081 | 10.07064 | 10.29165  | 10.03985 | 10.44329 | 9.267499 | 8.996501 | 9.098915 | 10.29749 | 0.335   | -0.501   | 2.12E-07 | 2.80E-07 | 5.575505 | 10 |
| 4512_at   | YHR038W | RRF1     | 5.445584 | 5.59891  | 5.540675 | 5.779752 | 5.722194 | 5.856872 | 5.113513 | 5.442315 | 5.410772 | 5.364567  | 5.105295 | 5.248574 | 5.940125 | 5.744183 | 5.497588 | 5.401411 | 0.00835 | 0.0699   | 0.248    | 0.027014 | 1.194591 | 13 |
| 4513_at   | YHR039C | MSC7     | 9.627593 | 9.418054 | 8.563681 | 9.97851  | 10.10162 | 9.339697 | 10.48312 | 10.2501  | 10.00452 | 10.33042  | 9.913882 | 10.38684 | 8.494428 | 8.890323 | 8.52675  | 10.2181  | -0.121  | -0.36    | 0.000105 | 3.17E-05 | 2.817899 | 12 |
| 4515_i_at | YHL001W | RPL14B   | 10.30694 | 10.92208 | 11.06538 | 10.122   | 10.19583 | 10.79735 | 9.830671 | 10.04976 | 9.955548 | 9.753183  | 9.751109 | 9.691722 | 9.862228 | 8.907304 | 10.33425 | 9.84447  | -0.409  | 0.04     | 0.00464  | 0.0008   | 2.955332 | 16 |
| 4516_f_at | YHL001W | RPL14B   | 10.98401 | 11.18366 | 11.32659 | 10.63718 | 10.77029 | 11.07081 | 10.36102 | 10.66289 | 10.41044 | 10.01384  | 10.15435 | 9.440531 | 9.892222 | 9.513247 | 10.31855 | -0.482   | -0.0201 | 1.82E-07 | 2.54E-07 | 3.589896 | 18       |    |
| 4517_at   | YHR001W | QSH7     | 7.008213 | 7.100922 | 6.452301 | 7.061502 | 7.125788 | 6.890286 | 6.962441 | 7.308413 | 6.971023 | 6.684047  | 6.839944 | 6.34678  | 6.34168  | 6.151822 | 5.823205 | 6.853538 | -0.213  | -0.101   | 0.00122  | 0.000252 | 1.851199 | 15 |
| 4518_at   | YHR001W | QSR10    | 7.0697   | 7.184036 | 6.724257 | 10.24511 | 10.16404 | 10.09846 | 10.63273 | 10.78331 | 10.90579 | 10.89899  | 10.70507 | 11.26502 | 9.928149 | 9.6827   | 9.917931 | 11.20126 | 0.677   | -0.754   | 3.93E-09 | 2.14E-08 | 18.42455 | 10 |
| 4519_at   | YHR002W | LEU5     | 6.02783  | 5.987313 | 5.018529 | 6.497973 | 6.452695 | 6.363028 | 6.37811  | 6.83805  | 6.400694 | 6.692728  | 6.422095 | 6.386961 | 6.607678 | 5.95025  | 6.451007 | 6.573616 | 0.0881  | -0.117   | 0.00694  | 0.001136 | 1.53046  | 13 |
| 4520_at   | YHR003C |          | 6.212263 | 6.626595 | 6.260677 | 6.63154  | 6.58422  | 6.312189 | 6.6959   | 6.979561 | 6.497862 | 6.391853  | 6.434825 | 6.36515  | 5.253644 | 5.10368  | 4.934568 | 6.533978 | -0.32   | -0.222   | 2.18E-07 | 2.81E-07 | 2.899974 | 15 |
| 4521_at   | YHR004C | NEM1     | 7.94599  | 7.361566 | 6.248736 | 7.188532 | 8.195434 | 7.073859 | 8.57724  | 8.194571 | 7.861021 | 8.308163  | 8.045135 | 7.740555 | 7.744325 | 7.459645 | 7.609874 | 8.050579 | 0.121   | -0.185   | 0.0991   | 0.011947 | 1.900587 | 12 |
| 4522_at   | YHR005C | GPA1     | 4.448214 | 4.56935  | 4.193455 | 4.969783 | 5.078975 | 4.947506 | 5.010392 | 5.215387 | 4.873634 | 5.319492  | 4.907168 | 4.421997 | 4.912108 | 5.021783 | 4.897305 | 5.044423 | 0.107   | -0.0973  | 0.0331   | 0.004492 | 1.503348 | 13 |
| 4523_at   | YHR005C | MRS11    | 9.132048 | 9.377421 | 9.500965 | 9.94024  | 9.975387 | 9.167408 | 9.693756 | 9.679736 | 9.661299 | 9.381859  | 9.290476 | 9.967347 | 8.051111 | 7.948468 | 7.716907 | 9.729891 | -0.379  | -0.301   | 6.66E-08 | 1.30E-07 | 3.843576 | 17 |
| 4524_at   | YHR006W | STP2     | 6.042041 | 6.030956 | 5.797575 | 6.420069 | 6.220383 | 6.933061 | 6.437835 | 6.808736 | 6.669355 | 6.344315  | 6.793748 | 6.971378 | 7.555643 | 7.979284 | 8.035486 | 6.784165 | 0.494   | 0.0321   | 1.14E-07 | 1.87E-07 | 3.70743  | 7  |
| 4525_at   | YHR007C | ERG1     | 11.79707 | 12.05758 | 11.62801 | 12.08971 | 12.3164  | 12.19923 | 12.44263 | 12.50612 | 12.42381 | 12.59563  | 12.64369 | 12.63385 | 12.0387  | 12.16811 | 12.11732 | 12.54107 | 0.0905  | -0.16    | 1.57E-05 | 6.22E-06 | 1.702607 | 12 |
| 4526_at   | YHR008C | SOD1     | 8.982505 | 8.660985 | 8.472557 | 10.97666 | 10.52842 | 10.39827 | 11.2308  | 11.41946 | 11.23451 | 11.07901  | 11.34386 | 11.57336 | 7.694072 | 9.002327 | 8.745036 | 11.43286 | -0.0417 | -0.781   | 6.62E-08 | 1.79E-07 | 6.89513  | 11 |
| 4527_at   | YHR009C |          | 8.680196 | 8.857714 | 8.028756 | 8.735156 | 8.949721 | 8.982538 | 9.032754 | 9.04561  | 8.861967 | 8.539892  | 8.545066 | 8.731466 | 8.287595 | 8.293906 | 8.418154 | 8.836671 | -0.0792 | -0.11    | 0.0153   | 0.002255 | 1.475438 | 12 |
| 4528_i_at | YHR010W | RPL27A   | 10.60551 | 10.81392 | 10.88541 | 10.18692 | 10.33605 | 10.23024 | 9.969273 | 10.23816 | 9.890083 | 9.115291  | 9.157378 | 9.493249 | 8.145262 | 8.145262 | 8.441664 | 9.604425 | -0.623  | 0.00536  | 7.77E-09 | 3.25E-08 | 5.217597 | 18 |
| 4529_f_at | YHR010W | RPL27A   | 11.40996 | 11.54125 | 11.73531 | 10.94883 | 11.0527  | 11.40221 | 10.4174  | 10.54254 | 10.38051 | 9.531806  | 9.193014 | 9.512537 | 8.340447 | 8.631168 | 8.746313 | 9.991823 | -0.836  | 0.0296   | 2.12E-08 | 6.07E-08 | 9.164705 | 18 |
| 4530_at   | YHR011W | DI4A     | 4.676951 | 4.940931 | 4.87723  | 5.424713 | 5.509465 | 5.308551 | 4.623151 | 4.82282  | 4.524844 | 4.033181  | 4.219006 | 4.291558 | 4.104015 | 4.250647 | 3.886065 | 4.634726 | -0.272  | -0.0368  | 0.0094   | 0.001471 | 2.057216 | 16 |
| 4531_at   | YHR012W | VPS29    | 7.534694 | 7.411827 | 6.775455 | 7.320281 | 7.382397 | 7.092783 | 7.618735 | 7.563078 | 7.280749 | 7.516118  | 7.096996 | 7.057257 | 6.083664 | 6.106742 | 6.187475 | 7.313313 | -0.276  | -0.176   | 2.23E-05 | 8.94E-06 | 2.219685 | 15 |
| 4532_at   | YHR013C | ARD1     | 7.100989 | 7.247384 | 7.126466 | 6.244501 | 6.32253  | 6.444737 | 6.57655  | 5.79829  | 5.32453  | 4.894862  | 4.670279 | 4.668312 | 3.997349 | 4.399039 | 3.875022 | 5.183068 | -0.835  | 0.127    | 3.07E-09 | 1.87E-08 | 9.143067 | 18 |
| 4533_at   | YHR014W | SPO13    | 3.825004 | 3.915525 | 3.316868 | 3.725075 | 3.867074 | 3.510796 | 3.514944 | 3.654937 | 3.433415 | 3.467135  | 3.344446 | 3.095977 | 3.577976 | 3.300836 | 3.260196 | 3.505501 | -0.115  | 0.0139   | 0.0962   | 0.011635 | 1.305601 | 16 |
| 4534_at   | YHR015W | MIP6     | 4.99792  | 4.996929 | 4.648923 | 5.485035 | 5.690891 | 5.47884  | 6.169018 | 5.915956 | 5.928649 | 5.78243   | 6.148036 | 5.467608 | 5.136075 | 4.774485 | 4.918085 | 5.919367 | 0.0121  | -0.277   | 3.14E-05 | 1.18E-05 | 1.994242 | 12 |
| 4535_at   | YHR016C | YSC84    | 5.998262 | 5.889941 | 5.239444 | 6.895062 | 6.583374 | 6.528649 | 6.8401   | 7.005751 | 7.119946 | 7.340185  | 7.001244 | 7.26705  | 6.043606 | 5.886873 | 6.035057 | 7.153985 | 0.0929  | -0.357   | 1.69E-06 | 1.25E-06 | 2.952541 | 12 |
| 4536_at   | YHR017W | YSC83    | 7.015357 | 6.937942 | 6.032737 | 6.905106 | 6.94276  | 6.397778 | 7.102554 | 7.184574 | 6.811523 | 7.19784   | 6.98609  | 6.939985 | 6.666358 | 6.353475 | 6.315923 | 6.994003 | -0.0353 | -0.125   | 0.0638   | 0.008077 | 1.414502 | 12 |
| 4537_at   | YHR018C | ARG4     | 9.15123  | 9.183796 | 9.157649 | 9.32649  | 9.940806 | 9.041899 | 10.01716 | 9.745535 | 10.03219 | 10.076    | 9.996529 | 9.883569 | 8.697625 | 8.781344 | 8.761657 | 9.845204 | -0.135  | -0.298   | 0.000521 | 0.00122  | 2.504329 | 12 |
| 4538_at   | YHR019C | DED81    | 9.663939 | 9.901709 | 9.915792 | 9.919539 | 9.199566 | 9.433373 | 8.885449 | 8.901425 | 8.580284 | 7.9998    | 8.298476 | 7.739966 | 7.409249 | 7.717281 | 7.877046 | 8.564835 | -0.572  | 0.0529   | 1.59E-07 | 2.32E-07 | 4.55182  | 12 |
| 4539_at   | YHL023C | RMD11    | 4.980357 | 5.350603 | 5.071494 | 5.285692 | 5.150533 | 5.352478 | 5.120652 | 5.368846 | 5.188765 | 5.060043  | 5.348704 | 5.677745 | 5.13601  | 5.453443 | 5.451838 | 5.313232 | 0.0586  | -0.0197  | 0.277    | 0.029942 | 1.16799  | 13 |
| 4540_at   | YHL022C | SPO11    | 3.185486 | 3.288285 | 3.09313  | 3.59881  | 3.899119 | 3.688328 | 3.238145 | 3.202747 | 3.372588 | 3.219982  | 3.714097 | 3.095806 | 3.486383 | 3.397555 | 3.32918  | 3.337366 | 0.0173  | -0.00503 | 0.889    | 0.085402 | 1.047036 | 13 |
| 4541_at   | YHL021C | FMP12    | 5.714108 | 5.859556 | 4.872327 | 5.261139 | 5.34291  | 6.923584 | 7.045436 | 6.778529 | 6.802435 | 6.057259  | 5.900027 | 6.421994 | 6.458663 | 6.065948 | 6.260593 | 6.844254 | 0.0658  | -0.247   | 0.0803   | 0.009886 | 2.021426 | 12 |
| 4542_at   | YHL020C | OP11     | 7.765235 | 7.747265 | 7.247835 | 7.638847 | 7.774766 | 7.245138 | 8.199494 | 8.223336 | 7.844054 | 9.234061  | 8.461245 | 7.68014  | 9.632103 | 8.980435 | 8.664015 | 8.185945 | 0.422   | 0.0357   | 0.00168  | 0.000331 | 3.063392 | 7  |
| 4543_at   | YHL019C | APM2     | 5.729584 | 5.951835 | 6.153573 | 6.205253 | 6.241984 | 6.340544 | 6.304176 | 6.377019 | 6.137243 | 6.297247  | 6.238989 | 6.282743 | 5.879335 | 6.133799 | 6.002929 | 6.303487 | 0.0082  | -0.0887  | 0.00273  | 0.000502 | 1.255647 | 13 |
| 4544_at   | YHL018W |          | 3.405559 | 3.250516 | 2.829684 | 3.200448 | 3.407699 | 3.262448 | 3.476145 | 3.47003  | 3.505632 | 3.286011  | 3.09615  | 2.827578 | 3.086967 | 2.780822 | 3.286328 | 3.246296 | -0.0742 | -0.0574  | 0.0766   | 0.009478 | 1.297421 | 13 |
| 4545_at   | YHL017W |          | 6.51322  | 6.750667 | 5.437633 | 6.464411 | 6.478372 | 6.471843 | 6.896463 | 6.246746 | 6.372929 | 5.786332  | 5.804086 | 5.882458 | 5.209996 | 5.196051 | 5.145816 | 6.178417 | -0.31   | -0.125   | 0.000607 | 0.000139 | 2.34167  | 10 |
| 4546_at   | YHL016C | DUR3     | 5.954143 | 5.890112 | 5.379603 | 6.835329 | 6.825095 | 7.65706  | 7.998665 | 7.198234 | 7.12009  | 8.202235  | 7.637585 | 8.306099 | 7.999936 | 7.54936  | 7.855777 | 8.256599 | 0.463   | -0.389   | 0.000951 | 0.000204 | 3.589931 | 15 |
| 4547_at   | YHL015W | RPS20    | 11.37652 | 11.55926 | 11.68897 | 10.78099 | 10.98796 | 11.39436 | 10.4083  | 10.54657 | 10.7143  | 9.9171067 | 9.12233  | 9.586046 | 7.859433 | 7.739331 | 8.470222 | 9.948436 | -0.0917 | -0.0384  | 1.03E-08 | 3.89E-08 | 13.07535 | 20 |
| 4548_at   | YHL014C | YLF2     | 4.940767 | 5.082954 | 4.485507 | 5.187278 | 5.541016 | 4.996736 | 5.457378 | 5.626291 | 5.085016 | 5.62355   | 5        |          |          |          |          |          |         |          |          |          |          |    |

|           |                |          |          |          |          |          |          |          |          |          |          |          |          |          |          |          |          |         |          |          |          |          |    |
|-----------|----------------|----------|----------|----------|----------|----------|----------|----------|----------|----------|----------|----------|----------|----------|----------|----------|----------|---------|----------|----------|----------|----------|----|
| 4581_at   | YHL027W RIM101 | 9.93071  | 9.888965 | 9.143962 | 10.03549 | 10.03751 | 9.627549 | 10.10577 | 10.53445 | 10.28809 | 10.24411 | 10.64252 | 10.24082 | 10.83925 | 10.70155 | 11.04358 | 10.32671 | 0.311   | -0.0204  | 0.000363 | 8.94E-05 | 2.281618 | 7  |
| 4582_at   | YHL026C        | 6.812215 | 6.696286 | 6.548273 | 6.764649 | 7.117682 | 6.620739 | 7.743635 | 8.22194  | 7.183264 | 8.070481 | 8.720983 | 7.868515 | 6.165756 | 7.057882 | 6.656125 | 7.806464 | 0.0809  | -0.33    | 0.00917  | 0.00144  | 2.531901 | 12 |
| 4583_at   | YHL025W SNF6   | 8.074223 | 7.907844 | 8.003158 | 8.061165 | 8.293433 | 8.048454 | 8.381125 | 8.741026 | 8.387283 | 9.218714 | 8.924059 | 8.433862 | 10.45037 | 9.859212 | 9.851379 | 8.655899 | 0.54    | 0.0989   | 4.76E-07 | 4.93E-07 | 4.180329 | 7  |
| 4584_at   | YHL024W RIM4   | 6.684893 | 4.583713 | 4.348371 | 5.189182 | 5.034974 | 5.043974 | 5.368274 | 5.892483 | 5.596769 | 6.274459 | 6.391881 | 6.652328 | 6.067731 | 6.199177 | 6.009795 | 5.981201 | 0.468   | -0.191   | 7.87E-06 | 3.95E-06 | 3.454607 | 7  |
| 4705_at   | YGR275W RTT102 | 8.405174 | 8.438421 | 8.371401 | 8.854828 | 8.860951 | 8.4107   | 8.933206 | 8.947256 | 8.365787 | 9.284145 | 8.70633  | 8.693192 | 8.992966 | 8.521938 | 8.435801 | 8.849638 | 0.0688  | -0.0884  | 0.0909   | 0.011056 | 1.383367 | 13 |
| 4706_at   | YGR276C RNH70  | 8.383456 | 8.436468 | 7.833969 | 7.726755 | 8.159753 | 7.756627 | 8.063718 | 8.277392 | 7.771324 | 8.219131 | 7.918113 | 7.817471 | 8.902064 | 7.72657  | 7.965558 | 7.947657 | 0.0135  | 0.0733   | 0.413    | 0.042824 | 1.210886 | 13 |
| 4707_at   | YGR277C        | 9.027167 | 8.85386  | 8.866049 | 8.861867 | 8.975621 | 8.832044 | 9.021732 | 8.920391 | 8.715775 | 8.885468 | 8.654681 | 8.331812 | 8.123641 | 7.687155 | 7.916383 | 8.746681 | -0.262  | -0.0918  | 5.01E-06 | 2.82E-06 | 2.003337 | 15 |
| 4708_at   | YGR278W CWC22  | 4.566533 | 4.742243 | 4.475101 | 4.58655  | 4.845551 | 4.703069 | 4.715242 | 4.485444 | 4.26396  | 4.452824 | 4.314083 | 4.596695 | 4.061179 | 4.422586 | 4.110135 | 4.519594 | -0.112  | -0.0312  | 0.0135   | 0.002027 | 1.346722 | 16 |
| 4709_at   | YGR279C SCW4   | 11.26644 | 11.36794 | 10.9101  | 11.34995 | 11.27308 | 11.18319 | 11.66006 | 11.48823 | 11.20847 | 11.62297 | 11.54845 | 11.90519 | 11.13577 | 11.34335 | 11.52148 | 11.54168 | 0.0671  | -0.0816  | 0.0506   | 0.006559 | 1.357055 | 13 |
| 4710_at   | YGR280C PXR1   | 8.837726 | 8.999782 | 9.105395 | 8.910342 | 8.70149  | 8.258241 | 8.890148 | 9.298271 | 8.297622 | 9.491136 | 8.637608 | 8.694614 | 8.055408 | 7.351297 | 8.057597 | 8.776535 | -0.247  | -0.11    | 0.0147   | 0.002181 | 2.01376  | 15 |
| 4711_at   | YGR281W YOR1   | 7.158399 | 7.014524 | 6.102945 | 7.436732 | 7.358676 | 7.096728 | 8.296956 | 8.156627 | 8.252857 | 8.807644 | 8.720455 | 9.42706  | 8.940762 | 8.363672 | 9.362217 | 8.516883 | 0.619   | -0.201   | 6.11E-05 | 2.03E-05 | 5.16323  | 4  |
| 4712_at   | YGR282C BGL2   | 10.36882 | 10.3383  | 10.01932 | 10.36298 | 10.18986 | 10.54697 | 10.60437 | 10.57768 | 10.74572 | 10.39302 | 10.40491 | 10.89417 | 9.430075 | 9.833417 | 10.46039 | 10.56688 | -0.0721 | -0.138   | 0.00181  | 0.002616 | 1.556421 | 12 |
| 4713_at   | YGR283C        | 6.531719 | 6.441061 | 5.976342 | 5.96458  | 6.177303 | 5.544432 | 6.072903 | 6.031442 | 5.552126 | 5.67089  | 5.427254 | 4.807491 | 4.936821 | 4.961886 | 5.090521 | 5.511422 | -0.356  | 0.0407   | 0.000138 | 3.97E-05 | 2.572665 | 16 |
| 4714_at   | YGR284C ERV29  | 8.105828 | 8.440586 | 8.190016 | 7.961971 | 7.838546 | 7.776888 | 7.582812 | 7.28806  | 7.49946  | 6.066826 | 5.808291 | 6.986304 | 5.43887  | 5.626169 | 6.012147 | 6.905441 | -0.728  | 0.0252   | 2.22E-06 | 1.53E-06 | 6.894021 | 18 |
| 4715_at   | YGR285C ZUO1   | 9.801895 | 9.955583 | 9.917505 | 9.444853 | 9.32513  | 9.531514 | 9.268082 | 9.214107 | 9.340332 | 8.997289 | 9.097817 | 9.805109 | 8.254981 | 8.741388 | 8.707117 | 9.230807 | -0.314  | -0.00338 | 0.000203 | 5.50E-05 | 2.967922 | 16 |
| 4716_at   | YGR286C B1O2   | 10.85037 | 10.36958 | 9.806688 | 10.64076 | 10.75496 | 10.33895 | 10.42484 | 10.18052 | 10.66675 | 9.448213 | 9.403108 | 9.41785  | 8.154768 | 7.896822 | 8.162336 | 9.988115 | -0.641  | -0.208   | 4.2E-07  | 4.54E-07 | 5.47641  | 7  |
| 4717_at   | YGR287C        | 4.438463 | 4.689362 | 3.935739 | 4.971511 | 5.023357 | 5.511147 | 5.37124  | 5.373782 | 5.52204  | 5.510194 | 5.250906 | 5.508263 | 6.843355 | 6.331764 | 6.996365 | 5.529767 | 0.564   | 0.00803  | 1.14E-05 | 5.28E-06 | 4.454152 | 7  |
| 4718_at   | YGR288W MAL13  | 5.39824  | 5.359613 | 5.480555 | 5.258748 | 5.069676 | 5.510986 | 5.407156 | 5.658281 | 5.733255 | 5.370702 | 5.58693  | 5.185617 | 4.700841 | 4.549649 | 4.893363 | 5.461071 | -0.0956 | -0.154   | 0.0054   | 0.00091  | 1.679657 | 12 |
| 4719_at   | YGR289C MAL11  | 4.396593 | 4.040867 | 3.277052 | 4.560905 | 4.624224 | 4.683417 | 5.085497 | 5.186048 | 5.201586 | 5.224838 | 5.026892 | 5.067659 | 6.665862 | 5.996466 | 5.69991  | 5.172528 | 0.517   | -0.0558  | 0.000102 | 3.12E-05 | 3.941008 | 7  |
| 4720_at   | YGR290W        | 4.123947 | 4.064016 | 3.86673  | 3.900723 | 3.594216 | 4.127207 | 3.375302 | 3.830401 | 3.913844 | 3.345828 | 3.740088 | 3.526434 | 3.738737 | 3.440469 | 3.756423 | 3.657384 | -0.0763 | 0.0287   | 0.352    | 0.037037 | 1.224111 | 13 |
| 4721_at   | YGR291C        | 3.944182 | 3.819852 | 3.58294  | 3.980514 | 3.800704 | 4.122924 | 3.205761 | 3.722537 | 4.01827  | 3.683083 | 3.54501  | 3.32002  | 3.504179 | 3.595557 | 3.721016 | 3.664353 | -0.0753 | 0.0136   | 0.36     | 0.037813 | 1.220791 | 13 |
| 4722_s_at | YGR293C        | 4.760339 | 4.616153 | 4.185769 | 4.387713 | 4.285645 | 4.534121 | 4.049375 | 4.391756 | 4.4633   | 4.05823  | 4.412881 | 3.945996 | 4.281478 | 4.321261 | 4.479457 | 4.228448 | -0.0566 | 0.0601   | 0.131    | 0.015321 | 1.26674  | 13 |
| 4723_f_at | YGR294W PAM12  | 11.94529 | 12.03605 | 12.43547 | 12.00917 | 11.98973 | 12.12312 | 11.16544 | 11.54812 | 11.87444 | 11.36283 | 11.78825 | 12.27664 | 11.91217 | 11.81332 | 12.07236 | 11.72547 | -0.0521 | 0.0881   | 0.23     | 0.02528  | 1.345494 | 13 |
| 4724_i_at | YGR122C-A      | 7.789037 | 7.710395 | 7.404163 | 8.029894 | 8.245061 | 7.856168 | 8.087805 | 8.446524 | 8.466769 | 8.087805 | 8.329407 | 8.73195  | 7.983792 | 8.121145 | 8.701157 | 8.370126 | 0.166   | -0.116   | 0.00553  | 0.000299 | 1.72841  | 9  |
| 4725_f_at | YGR122C-A      | 2.833966 | 2.735326 | 2.461879 | 2.698664 | 3.237726 | 2.909444 | 2.688888 | 3.331751 | 2.970391 | 2.635553 | 3.043892 | 2.930975 | 2.888881 | 2.958592 | 3.200491 | 2.972027 | 0.0676  | -0.032   | 0.312    | 0.03325  | 1.204816 | 13 |
| 4726_at   | YGL006w-a      | 4.173944 | 4.242347 | 3.996224 | 4.596043 | 4.368365 | 4.464828 | 3.6924   | 4.07743  | 4.294219 | 3.871835 | 4.224867 | 3.823182 | 4.456397 | 4.99217  | 4.817099 | 4.149005 | 0.186   | 0.137    | 0.00816  | 0.001304 | 1.88842  | 8  |
| 4727_s_at | YGR029W ERV1   | 8.977368 | 8.970738 | 8.95292  | 8.312919 | 8.353331 | 8.050203 | 8.489572 | 8.506665 | 8.210884 | 8.146069 | 7.918235 | 7.76214  | 7.09601  | 6.60476  | 6.624053 | 8.035054 | -0.54   | -0.0508  | 1.76E-07 | 2.47E-07 | 4.185802 | 18 |
| 4729_i_at | YGR254W ENO1   | 13.21556 | 13.1964  | 12.95968 | 13.18011 | 13.1611  | 13.28998 | 13.22569 | 13.19941 | 13.48243 | 13.38496 | 13.42114 | 13.45957 | 13.47534 | 13.41831 | 13.52947 | 13.35755 | 0.0979  | -0.0711  | 0.00119  | 0.000246 | 1.296331 | 13 |
| 4730_s_at | YGR254W ENO1   | 12.73656 | 12.89654 | 12.79506 | 12.39286 | 12.56753 | 12.89901 | 12.58062 | 13.0167  | 13.07759 | 12.99859 | 12.9967  | 13.03934 | 12.86247 | 12.81061 | 13.13519 | 12.87713 | 0.0598  | -0.00598 | 0.394    | 0.041074 | 1.71852  | 13 |
| 4731_at   | YGR255C COQ6   | 7.408332 | 7.609333 | 7.48382  | 8.021299 | 8.089331 | 8.271136 | 8.374126 | 8.606739 | 8.629195 | 8.306501 | 8.18895  | 8.503071 | 8.469481 | 7.216136 | 7.473736 | 8.443907 | -0.11   | -0.322   | 1.41E-05 | 6.18E-06 | 2.534187 | 12 |
| 4732_at   | YGR256W GND2   | 6.798784 | 6.699801 | 6.406019 | 8.077589 | 7.69736  | 7.841423 | 8.903095 | 9.306987 | 9.117682 | 7.99542  | 8.325081 | 8.452291 | 8.146981 | 7.571599 | 7.983741 | 8.692348 | 0.276   | -0.391   | 0.000713 | 0.000159 | 4.015316 | 16 |
| 4733_at   | YGR257C MTM1   | 8.072878 | 8.001733 | 7.960448 | 7.865318 | 8.028888 | 8.017173 | 7.937291 | 7.878718 | 8.093148 | 7.684462 | 7.760944 | 7.555252 | 7.259912 | 7.345067 | 7.789356 | 7.89335  | -0.159  | -0.0534  | 4.41E-05 | 1.56E-05 | 1.52536  | 16 |
| 4734_at   | YGR258C RAD2   | 6.006947 | 5.964312 | 5.640193 | 6.335408 | 6.396361 | 6.478819 | 7.066699 | 7.121201 | 6.766175 | 7.282962 | 7.008849 | 6.708684 | 7.928182 | 7.789177 | 7.554795 | 6.990404 | 0.475   | -0.0502  | 3.52E-06 | 2.16E-06 | 3.517853 | 7  |
| 4735_at   | YGR259C        | 5.629329 | 5.366928 | 4.830916 | 5.04647  | 5.170317 | 4.397901 | 5.112163 | 5.454933 | 5.460174 | 5.342406 | 5.411314 | 4.594107 | 4.747687 | 4.862982 | 4.651528 | 5.196855 | -0.135  | -0.0511  | 0.0534   | 0.006889 | 1.440357 | 16 |
| 4736_at   | YGR260W TNA1   | 9.534181 | 9.200508 | 8.756605 | 9.485557 | 9.571776 | 10.1522  | 9.689982 | 9.733784 | 9.78057  | 8.285151 | 8.549689 | 9.077922 | 7.698927 | 7.837751 | 8.450247 | 9.290858 | -0.385  | -0.186   | 0.000829 | 0.000181 | 3.058877 | 15 |
| 4737_at   | YGR261C AP16   | 7.734197 | 7.835987 | 7.428396 | 7.02477  | 7.159511 | 7.050824 | 7.010253 | 7.36849  | 6.959254 | 6.997503 | 6.641814 | 6.406967 | 6.494788 | 6.24739  | 6.074085 | 6.821971 | -0.356  | 0.0381   | 5.32E-06 | 2.94E-06 | 2.573336 | 16 |
| 4738_at   | YGR262C BUD32  | 5.594642 | 5.578076 | 5.072174 | 5.011481 | 5.114574 | 5.055206 | 4.974161 | 5.320441 | 4.980605 | 4.912729 | 4.919709 | 4.980414 | 4.676318 | 4.284892 | 3.992662 | 4.941279 | -0.268  | -0.0231  | 0.000146 | 4.18E-05 | 2.037138 | 16 |
| 4739_at   | YGR263C SAYS1  | 6.969448 | 7.175247 | 7.109741 | 7.222354 | 7.424489 | 7.167845 | 7.458838 | 7.430701 | 7.178304 | 7.492362 | 7.329903 | 7.276711 | 7.227528 | 7.201904 | 6.919946 | 7.369833 | 0.0104  | -0.0742  | 0.0129   | 0.001941 | 2.167917 | 13 |
| 4740_at   | YGR264C MEY1   | 10.44367 | 10.41391 | 9.493005 | 9.28184  | 9.566218 | 9.100896 | 9.462591 | 9.220209 | 9.083406 | 9.042516 | 9.051203 | 8.471957 | 10.15542 | 9.04861  | 9.014742 | 8.995647 | -0.191  | 0.209    | 0.00847  | 0.001346 | 2.256951 | 14 |
| 4741_at   | YGR265W        | 3.471361 | 3.110218 | 2.879311 | 3.193845 | 2.978271 | 3.254546 | 3.11027  | 3.194185 | 3.259214 | 3.094573 | 3.042255 | 2.722477 | 3.011867 | 3.103278 | 2.83883  | 3.070218 | -0.0584 | 0.000765 | 0.312    | 0.033289 | 1.167337 | 13 |
| 4742_at   | YGR266W        | 6.123353 | 6.073424 | 5.348728 | 6.679131 | 6.318663 | 5.891509 | 6.535007 | 6.391095 | 6.691833 | 6.693226 | 6.697054 | 6.80689  | 5.505196 | 5.334577 | 5.313264 | 6.658607 | -0.0808 | -0.289   | 0.000376 | 9.22E-05 | 2.236414 | 12 |
| 4743_at   | YGR267C FOL2   | 9.       |          |          |          |          |          |          |          |          |          |          |          |          |          |          |          |         |          |          |          |          |    |

|           |               |          |           |          |          |          |          |          |          |          |          |          |          |          |          |          |           |          |          |          |          |          |    |
|-----------|---------------|----------|-----------|----------|----------|----------|----------|----------|----------|----------|----------|----------|----------|----------|----------|----------|-----------|----------|----------|----------|----------|----------|----|
| 4774_at   | YGR209C TRX2  | 9.691119 | 9.677237  | 9.994799 | 10.42637 | 10.51756 | 10.88798 | 10.71171 | 10.58865 | 10.5728  | 10.58012 | 10.47744 | 10.65911 | 9.981256 | 10.05687 | 10.28043 | 10.70719  | 0.0586   | -0.204   | 4.58E-05 | 1.60E-05 | 1.801586 | 12 |
| 4775_at   | YGR210C       | 7.473636 | 7.86684   | 8.08328  | 8.148323 | 8.10496  | 8.440391 | 7.895559 | 7.997501 | 8.119527 | 8.333794 | 8.299077 | 8.776181 | 8.591274 | 8.008759 | 8.924523 | 8.8318023 | 0.188    | -0.042   | 0.0219   | 0.003104 | 1.645855 | 9  |
| 4776_at   | YGR211W ZPR1  | 6.260915 | 6.397294  | 5.763368 | 6.119632 | 6.306239 | 5.898295 | 6.577611 | 6.347573 | 5.971708 | 6.017136 | 5.646704 | 5.854205 | 7.05001  | 6.487508 | 7.402357 | 6.06991   | 0.17     | 0.138    | 0.0158   | 0.002319 | 1.841601 | 8  |
| 4777_at   | YGR212W SLR1  | 3.941466 | 4.079769  | 3.271705 | 3.721874 | 4.106351 | 3.66547  | 3.92538  | 3.803934 | 3.697343 | 3.382504 | 3.521177 | 3.460724 | 3.520656 | 3.693089 | 4.70019  | 3.67033   | 0.155    | 0.142    | 0.0567   | 0.007266 | 1.814027 | 8  |
| 4778_at   | YGR213C RTA1  | 5.580332 | 5.489472  | 4.72151  | 4.779646 | 5.278744 | 5.141312 | 4.711398 | 4.889098 | 4.578247 | 4.541329 | 4.804983 | 4.742752 | 4.74467  | 4.678826 | 4.678381 | 4.736399  | -0.154   | 0.0706   | 0.0189   | 0.002721 | 1.518885 | 16 |
| 4779_f_at | YGR214W RPS0A | 10.77515 | 10.6561   | 10.39373 | 9.356376 | 9.950129 | 9.979123 | 9.766838 | 9.543176 | 9.182461 | 8.302973 | 8.163446 | 7.886994 | 7.089449 | 6.319603 | 6.63356  | 8.744408  | -1.06    | -0.0245  | 2.46E-09 | 1.74E-08 | 16.51715 | 20 |
| 4780_at   | YGR214W RPS0A | 11.29787 | 11.35586  | 11.41258 | 10.42922 | 10.81742 | 10.81035 | 10.27747 | 10.02208 | 9.853116 | 8.987147 | 8.994785 | 8.871014 | 7.9992   | 7.950706 | 7.974199 | 9.519695  | -0.927   | 0.0468   | 4.29E-10 | 7.34E-09 | 11.68711 | 20 |
| 4781_at   | YGR215W RSM27 | 5.08093  | 5.297621  | 5.820944 | 5.986736 | 5.97871  | 6.461099 | 6.025981 | 6.039656 | 5.586761 | 5.367429 | 5.466666 | 6.047685 | 4.686554 | 4.380341 | 4.656936 | 5.890183  | -0.246   | -0.241   | 0.000108 | 3.25E-05 | 2.664217 | 15 |
| 4782_at   | YGR216C GP11  | 5.869387 | 5.926631  | 5.1258   | 5.588444 | 5.421284 | 5.226073 | 5.391476 | 5.45179  | 5.240695 | 4.993575 | 4.973071 | 5.371539 | 4.415077 | 4.611528 | 4.831858 | 5.210604  | -0.264   | -0.0225  | 0.000406 | 9.85E-05 | 2.012724 | 16 |
| 4783_at   | YGR217W CCH1  | 4.699718 | 5.000805  | 5.166797 | 4.411803 | 4.489129 | 4.720375 | 4.100097 | 4.115488 | 4.066548 | 4.270141 | 4.350869 | 4.335401 | 5.295069 | 4.760396 | 5.025399 | 4.22033   | 0.0176   | 0.214    | 0.000131 | 3.81E-05 | 1.707249 | 13 |
| 4784_at   | YGR218W CRM1  | 4.010941 | 4.309504  | 3.416093 | 3.922092 | 4.146956 | 3.677736 | 4.309547 | 4.024922 | 4.162166 | 4.28755  | 4.256501 | 5.101382 | 4.166296 | 4.110572 | 4.905234 | 4.303428  | 0.163    | -0.0465  | 0.12     | 0.014165 | 1.542128 | 13 |
| 4785_at   | YGR219W       | 5.75758  | 6.074019  | 5.133376 | 5.409792 | 5.887212 | 5.825441 | 5.66569  | 5.705176 | 5.747554 | 4.979253 | 5.852649 | 5.243068 | 5.754196 | 5.807756 | 5.087864 | 5.551226  | -0.0136  | 0.0584   | 0.5      | 0.050834 | 1.177105 | 13 |
| 4786_at   | YGR220C MRPL9 | 8.103519 | 8.368252  | 8.323874 | 8.784291 | 8.79089  | 8.852622 | 8.830587 | 8.486941 | 8.67469  | 8.453694 | 8.443487 | 8.72474  | 7.792983 | 7.881222 | 8.034661 | 8.694615  | -0.114   | -0.163   | 1.83E-05 | 7.61E-06 | 1.773226 | 12 |
| 4787_at   | YGR221C TOS2  | 5.587124 | 5.684297  | 5.827758 | 5.603592 | 5.455784 | 5.939595 | 4.48445  | 4.807978 | 5.222931 | 4.5895   | 5.00268  | 4.315786 | 4.985021 | 5.046911 | 5.191866 | 4.874838  | -0.215   | 0.151    | 0.0114   | 0.001744 | 2.034169 | 14 |
| 4788_at   | YGR222W PET54 | 7.455897 | 7.514228  | 7.090192 | 7.284845 | 7.438496 | 7.265572 | 7.592422 | 7.778696 | 7.512374 | 6.977831 | 7.087719 | 7.083169 | 6.211244 | 6.423085 | 6.426314 | 7.295111  | -0.271   | -0.122   | 6.63E-06 | 3.47E-06 | 2.16039  | 15 |
| 4789_at   | YGR223C HSV2  | 7.682756 | 7.650186  | 7.302197 | 7.263774 | 7.387383 | 7.535821 | 7.419454 | 7.665303 | 7.557981 | 8.081765 | 7.836504 | 7.806763 | 8.012584 | 8.002234 | 8.105097 | 7.673878  | 0.161    | 0.0281   | 0.00194  | 0.000375 | 1.532951 | 16 |
| 4790_at   | YGR224W AZR1  | 5.476777 | 5.250128  | 4.717129 | 5.450612 | 4.856525 | 5.691986 | 4.537761 | 5.251517 | 5.007208 | 4.668546 | 5.080518 | 4.475314 | 4.717654 | 4.784705 | 4.840443 | 4.932091  | -0.131   | 0.0153   | 0.214    | 0.023712 | 1.414102 | 16 |
| 4791_at   | YGR225W AMA1  | 4.198196 | 3.880781  | 3.413194 | 4.232689 | 4.17371  | 4.487267 | 4.653817 | 4.922863 | 5.159665 | 6.006669 | 5.38663  | 5.284958 | 4.261843 | 4.073666 | 4.206526 | 5.160411  | 0.17     | -0.327   | 0.000859 | 0.000187 | 2.901597 | 10 |
| 4792_at   | YGR226C       | 7.348539 | 7.3563022 | 7.326291 | 6.378435 | 7.372944 | 7.945101 | 8.386212 | 9.321901 | 4.273441 | 4.055774 | 4.016063 | 4.117471 | 3.500643 | 3.654006 | 3.99691  | 4.043217  | 0.0618   | -0.119   | 0.00652  | 0.001076 | 1.471691 | 12 |
| 4793_at   | YGR227W DIE2  | 6.611872 | 6.736206  | 5.930622 | 6.493174 | 6.397972 | 5.686111 | 6.503139 | 6.489069 | 6.594199 | 6.081066 | 6.359507 | 6.327088 | 5.70971  | 6.022169 | 5.747338 | 6.398103  | -0.166   | -0.0737  | 0.00192  | 0.000372 | 1.598795 | 16 |
| 4794_at   | YGR228W       | 6.675662 | 6.944903  | 6.332517 | 6.151439 | 6.341407 | 6.84116  | 6.440827 | 6.525376 | 6.593003 | 6.227615 | 6.29785  | 6.885367 | 6.41423  | 6.583451 | 6.032426 | 6.183699  | -0.141   | 0.0512   | 0.0575   | 0.007358 | 1.453216 | 16 |
| 4795_at   | YGR229C SM11  | 6.990828 | 7.02176   | 6.397998 | 6.813604 | 6.890507 | 6.07628  | 6.896734 | 7.197638 | 6.854212 | 7.552198 | 6.853711 | 6.227396 | 7.020951 | 6.483035 | 6.374618 | 6.838881  | -0.0253  | -0.0391  | 0.799    | 0.077668 | 1.142771 | 13 |
| 4796_at   | YGR230W BNS1  | 3.549394 | 3.491828  | 3.484403 | 3.709064 | 3.624003 | 3.703893 | 3.569003 | 3.830483 | 3.732119 | 3.562165 | 3.580792 | 3.632332 | 3.272921 | 3.468873 | 3.218318 | 3.689476  | -0.0562  | -0.0692  | 0.000193 | 5.28E-05 | 1.291919 | 13 |
| 4797_at   | YGR187C GH1   | 7.266291 | 7.338012  | 6.596668 | 6.468026 | 6.465835 | 6.210908 | 5.95728  | 6.112919 | 5.729281 | 5.61326  | 5.48103  | 4.874522 | 4.523054 | 4.557636 | 5.602278 | 0.18      | 0.0566   | 1.09E-07 | 1.80E-07 | 5.930037 | 18       |    |
| 4798_at   | YGR188C BUB1  | 3.756788 | 3.758245  | 3.760979 | 3.939542 | 3.868    | 3.967459 | 3.49851  | 3.779915 | 3.885687 | 3.480763 | 3.791076 | 3.776115 | 3.823582 | 3.828515 | 3.586639 | 3.698991  | -0.0336  | 0.0194   | 0.567    | 0.056981 | 1.016513 | 13 |
| 4799_at   | YGR189C CRH1  | 9.114709 | 9.277585  | 9.063491 | 9.048452 | 9.101583 | 9.034617 | 8.816249 | 8.912582 | 9.078428 | 8.941336 | 8.94995  | 8.306302 | 8.744638 | 9.091641 | 9.252913 | 8.950352  | -0.03597 | 0.0381   | 0.137    | 0.015917 | 1.161318 | 12 |
| 4800_at   | YGR190C       | 3.721124 | 3.596584  | 3.374165 | 3.618471 | 3.580797 | 3.793963 | 3.876371 | 3.678682 | 4.155162 | 3.659437 | 3.63866  | 3.296817 | 3.240871 | 3.395786 | 3.159068 | 3.70235   | -0.0919  | -0.0789  | 0.0129   | 0.001943 | 1.405444 | 12 |
| 4801_at   | YGR191W HIP1  | 8.396095 | 8.515944  | 7.130296 | 7.923308 | 8.074329 | 7.951514 | 8.110773 | 8.683704 | 8.426593 | 7.945842 | 8.282283 | 8.161511 | 7.445871 | 7.401132 | 7.504994 | 8.199805  | -0.134   | -0.132   | 0.0358   | 0.004823 | 1.709422 | 15 |
| 4802_i_at | YGR192C TDH3  | 13.53435 | 13.61273  | 13.55337 | 13.10991 | 13.15143 | 13.18777 | 13.01548 | 13.25286 | 13.22547 | 12.40404 | 12.78893 | 12.69279 | 12.33135 | 12.26669 | 12.26896 | 12.84507  | -0.344   | 0.0231   | 3.58E-08 | 8.78E-08 | 2.49227  | 16 |
| 4803_at   | YGR193C PDX1  | 7.066788 | 7.322359  | 7.048078 | 7.057194 | 7.011869 | 6.918338 | 7.006628 | 7.222848 | 7.018191 | 6.824387 | 6.756047 | 6.712479 | 6.447686 | 6.454581 | 6.385459 | 6.892586  | -0.191   | -0.0293  | 2.64E-06 | 1.74E-06 | 1.65961  | 12 |
| 4804_at   | YGR194C XKS1  | 5.477156 | 5.651192  | 5.185873 | 6.245738 | 6.079668 | 5.888847 | 6.168176 | 5.980444 | 6.035211 | 5.242556 | 5.282305 | 5.673025 | 5.132938 | 5.208468 | 5.480792 | 5.827773  | -0.109   | -0.126   | 0.0267   | 0.003702 | 1.611733 | 12 |
| 4805_at   | YGR195W SK16  | 7.931673 | 8.259946  | 8.145369 | 7.660695 | 7.732037 | 7.66877  | 7.314462 | 7.588593 | 7.139849 | 7.233017 | 7.214306 | 6.834387 | 6.393951 | 6.595383 | 6.391059 | 7.207853  | -0.428   | 0.0224   | 1.45E-07 | 2.20E-07 | 8.874029 | 16 |
| 4806_at   | YGR196C FVY8  | 5.963003 | 5.980915  | 5.314135 | 5.847717 | 5.741781 | 5.426755 | 6.10198  | 6.085948 | 5.950346 | 6.373852 | 6.109013 | 6.001618 | 6.794079 | 6.319482 | 6.580927 | 6.092439  | 0.237    | 0.0132   | 0.00513  | 0.000873 | 1.874494 | 7  |
| 4807_at   | YGR197C SNG2  | 7.450508 | 7.722228  | 7.140133 | 7.373155 | 7.32776  | 7.192927 | 7.531593 | 7.589862 | 7.442428 | 8.14128  | 8.593944 | 8.570561 | 10.4207  | 10.39941 | 10.3634  | 8.053312  | 0.852    | 0.211    | 4.63E-11 | 2.77E-09 | 9.580854 | 5  |
| 4808_at   | YGR198W YP1   | 8.316509 | 8.462051  | 7.893319 | 7.758236 | 7.891973 | 7.515307 | 7.285946 | 7.534667 | 7.286333 | 7.462523 | 7.330546 | 6.967976 | 6.790943 | 7.64938  | 7.305367 | 7.302928  | -0.183   | 0.162    | 0.000303 | 7.67E-05 | 1.986728 | 14 |
| 4809_at   | YGR199W PMT6  | 7.345137 | 7.792354  | 6.7603   | 7.362584 | 7.182109 | 7.199018 | 7.309648 | 7.142599 | 6.951868 | 6.179984 | 6.726352 | 6.883942 | 6.780059 | 6.652721 | 6.238307 | 6.892777  | -0.23    | 0.0139   | 0.0144   | 0.002135 | 1.84145  | 16 |
| 4810_at   | YGR200C ELP2  | 4.05966  | 4.631188  | 4.029424 | 4.026733 | 4.318161 | 4.312983 | 3.866825 | 3.981335 | 3.516549 | 3.788569 | 3.39912  | 3.268011 | 3.246559 | 3.234187 | 3.685745 | 0.269     | 0.0186   | 0.000265 | 6.88E-05 | 2.037896 | 16       |    |
| 4811_at   | YGR201C       | 7.207854 | 7.488765  | 7.745946 | 9.702867 | 9.496047 | 10.04853 | 10.34242 | 10.40189 | 10.33206 | 9.555432 | 9.826818 | 10.25571 | 9.676958 | 9.826233 | 10.10615 | 10.36735  | 0.526    | -0.452   | 3.13E-05 | 1.18E-05 | 6.949549 | 16 |
| 4812_at   | YGR202C PCT1  | 7.109004 | 7.384618  | 7.132182 | 7.348719 | 7.453185 | 7.153888 | 7.596421 | 7.645509 | 7.152944 | 7.842315 | 7.502947 | 7.463946 | 8.664413 | 8.265389 | 8.320553 | 7.538335  | 0.305    | 0.0751   | 9.51E-06 | 4.58E-06 | 2.244839 | 8  |
| 4813_at   | YGR203W       | 7.282175 | 7.400581  | 7.305866 | 7.759583 | 7.511869 | 8.025816 | 7.341397 | 7.801013 | 7.419539 | 7.097107 | 7.498564 | 8.183923 | 6.475034 | 7.119126 | 6.813466 | 7.639587  | -0.14    | -0.155   | 0.00713  | 0.001161 | 1.816307 | 12 |
| 4814_at   | YGR204W ADE3  | 10.96601 | 10.92804  | 10.91311 | 10.71945 | 10.51869 | 10.68124 | 10.47997 | 10.51972 | 10.61209 | 10.4796  | 10.46651 | 10.44635 | 10.58972 | 10.78976 | 10.62832 | 10.48029  | -0.0711  | 0.0885   | 5.29E-06 | 2.94E-06 | 1.388962 | 13 |
| 4815_at   | YGR205W       | 5.734128 | 5.243785  | 4.1591   |          |          |          |          |          |          |          |          |          |          |          |          |           |          |          |          |          |          |    |

|           |                 |          |          |          |          |          |          |          |          |          |          |          |          |          |          |          |          |         |          |          |          |          |    |
|-----------|-----------------|----------|----------|----------|----------|----------|----------|----------|----------|----------|----------|----------|----------|----------|----------|----------|----------|---------|----------|----------|----------|----------|----|
| 4846_at   | YGR146C         | 7.842584 | 7.851704 | 6.878375 | 7.968933 | 7.779627 | 7.866937 | 8.101169 | 8.258433 | 7.93445  | 8.789596 | 8.660918 | 9.003408 | 11.03766 | 10.3686  | 10.78019 | 8.486387 | 0.832   | 0.175    | 1.29E-08 | 4.58E-08 | 9.086992 | 6  |
| 4847_at   | YGR147C NAT2    | 8.210691 | 8.713728 | 7.576747 | 7.972384 | 8.285792 | 8.135717 | 8.335233 | 8.37997  | 7.960493 | 8.369772 | 8.17924  | 8.321682 | 7.784224 | 7.312091 | 7.767713 | 8.266189 | -0.0511 | -0.144   | 0.0031   | 0.000561 | 1.521808 | 12 |
| 4848_at   | YGR148C RPL24B  | 12.84618 | 12.83806 | 12.79846 | 12.57236 | 12.53754 | 12.49552 | 12.45273 | 12.54217 | 12.07553 | 12.2038  | 12.12507 | 12.08072 | 12.34998 | 12.28    | 12.97515 | 12.24097 | -0.174  | 0.0766   | 8.29E-05 | 2.61E-05 | 1.592849 | 16 |
| 4849_at   | YGR149W         | 7.955592 | 7.452304 | 6.380461 | 8.560692 | 8.40027  | 8.131327 | 8.282273 | 8.928886 | 8.605886 | 9.22163  | 9.345928 | 8.65515  | 7.943199 | 8.442688 | 8.26483  | 9.204694 | 0.285   | -0.407   | 0.00011  | 3.31E-05 | 4.276719 | 10 |
| 4850_at   | YGR150C         | 4.167812 | 4.091847 | 3.587668 | 4.390614 | 4.815961 | 4.25132  | 4.734277 | 4.298702 | 4.081974 | 4.365311 | 4.058847 | 4.294593 | 3.968681 | 3.880881 | 3.999338 | 4.399122 | -0.0269 | -0.119   | 0.0393   | 0.00523  | 1.357542 | 12 |
| 4851_i_at | YGR151C         | 7.73719  | 8.046649 | 8.503228 | 7.349306 | 7.467236 | 6.677226 | 6.197712 | 6.398938 | 5.864498 | 5.999728 | 6.13016  | 5.957674 | 6.13576  | 6.188106 | 5.910432 | 6.119075 | -0.534  | 0.271    | 1.34E-05 | 5.92E-06 | 4.545742 | 14 |
| 4852_s_at | YGR151C         | 7.19592  | 8.24135  | 8.653874 | 7.571012 | 7.63803  | 7.285265 | 6.938928 | 6.745798 | 6.736521 | 7.184525 | 6.740028 | 6.434157 | 6.533072 | 6.668347 | 6.456367 | 6.788002 | -0.438  | 0.173    | 2.12E-05 | 8.59E-06 | 3.189489 | 14 |
| 4853_at   | YGR152C RSR1    | 4.523653 | 4.72613  | 4.313411 | 3.975775 | 4.344364 | 3.737589 | 3.760769 | 3.718343 | 3.244037 | 3.776282 | 3.701427 | 3.502253 | 3.164625 | 3.067792 | 3.194436 | 3.600553 | -0.337  | 0.063    | 0.0001   | 3.06E-05 | 2.445757 | 16 |
| 4854_at   | YGR153W         | 2.846259 | 3.107422 | 3.172768 | 3.065638 | 3.261065 | 3.187202 | 2.882957 | 3.008979 | 2.775437 | 2.923827 | 2.977374 | 2.887944 | 2.925211 | 2.898413 | 3.094633 | 2.97084  | -0.0314 | 0.0135   | 0.517    | 0.052325 | 1.06852  | 13 |
| 4855_at   | YGR154C GTO1    | 5.849429 | 5.884306 | 6.027755 | 6.535824 | 6.311396 | 6.340319 | 6.240288 | 6.244454 | 6.869177 | 6.26099  | 6.553084 | 6.773883 | 5.622995 | 5.967175 | 6.096635 | 6.58251  | -0.023  | -0.194   | 0.000297 | 7.54E-05 | 1.638868 | 12 |
| 4856_at   | YGR155W CYS4    | 10.05197 | 10.33562 | 10.13551 | 10.22916 | 10.13489 | 9.957036 | 10.1903  | 10.07004 | 10.23846 | 10.12852 | 9.988422 | 10.21154 | 8.656078 | 8.671598 | 8.898645 | 10.09444 | -0.341  | -0.179   | 1.79E-07 | 2.51E-07 | 2.765738 | 15 |
| 4857_at   | YGR156W PTI1    | 4.753188 | 4.95601  | 4.216541 | 4.852538 | 4.577946 | 4.958939 | 4.464906 | 5.014803 | 4.840354 | 4.910459 | 5.152071 | 4.921833 | 4.716821 | 5.039039 | 4.776743 | 4.899948 | 0.0684  | -0.0411  | 0.272    | 0.029394 | 1.233105 | 10 |
| 4858_at   | YGR157W CHO2    | 4.505516 | 4.873495 | 4.036076 | 6.304433 | 6.163543 | 6.214482 | 6.468187 | 6.619869 | 6.541959 | 6.176039 | 6.532736 | 6.900955 | 6.365077 | 6.471206 | 6.958157 | 6.745235 | 0.494   | -0.324   | 9.16E-06 | 4.44E-06 | 4.853743 | 10 |
| 4859_at   | YGR158C MTR3    | 6.72647  | 7.106969 | 6.511945 | 6.380861 | 6.479507 | 6.315101 | 5.899044 | 6.469071 | 6.291162 | 5.689641 | 5.636524 | 5.322485 | 6.521111 | 6.010982 | 6.253426 | 5.891009 | -0.188  | 0.178    | 0.00021  | 0.00042  | 2.081834 | 14 |
| 4860_at   | YGR159C NSR1    | 10.02475 | 10.03848 | 9.61257  | 9.950041 | 9.672539 | 9.094124 | 9.040207 | 9.371406 | 9.05555  | 8.802031 | 8.236457 | 7.604098 | 9.806771 | 8.598923 | 9.075696 | 8.653346 | -0.253  | 0.245    | 0.00709  | 0.001158 | 2.713756 | 14 |
| 4861_at   | YGR160W         | 5.603954 | 5.629218 | 4.976585 | 4.741369 | 4.683277 | 5.035375 | 4.60079  | 5.377389 | 5.229755 | 4.653851 | 5.140468 | 4.441146 | 5.398437 | 4.615879 | 5.298954 | 4.802761 | -0.0762 | 0.121    | 0.115    | 0.013662 | 1.51347  | 10 |
| 4862_at   | YGR161C RTS3    | 8.987774 | 8.51917  | 7.618894 | 8.668977 | 8.623287 | 8.72625  | 8.366566 | 10.24767 | 9.638762 | 10.8555  | 10.6739  | 9.51333  | 12.16414 | 11.59797 | 12.31346 | 10.12901 | 1.01    | 0.00854  | 7.29E-07 | 6.64E-07 | 14.43543 | 6  |
| 4863_at   | YGR162W TIF4631 | 6.823516 | 7.122099 | 6.073834 | 5.819575 | 5.968917 | 5.912034 | 6.044831 | 6.374728 | 6.175129 | 5.766197 | 5.585721 | 5.515868 | 6.247405 | 5.256195 | 6.046809 | 5.776945 | -0.217  | 0.13     | 0.0125   | 0.007888 | 1.940576 | 14 |
| 4864_at   | YGR163W GTR2    | 5.213929 | 5.470093 | 5.331072 | 5.268623 | 5.197879 | 5.290505 | 5.368879 | 5.421632 | 5.265355 | 5.150945 | 5.140354 | 5.616613 | 5.216243 | 5.171353 | 5.342501 | 5.305688 | -0.0174 | -0.00571 | 0.812    | 0.071866 | 1.047137 | 13 |
| 4865_at   | YGR120C COG2    | 5.592256 | 5.931228 | 5.466677 | 5.387928 | 5.381727 | 5.07568  | 6.054433 | 5.178586 | 4.662779 | 3.936166 | 4.565984 | 4.348439 | 5.579991 | 4.711857 | 5.113558 | 4.600664 | -0.193  | 0.226    | 0.00284  | 0.00052  | 2.358186 | 14 |
| 4866_at   | YGR121C MEP1    | 7.046076 | 6.78411  | 6.545173 | 7.5043   | 6.998945 | 6.719392 | 7.201467 | 7.72457  | 7.577227 | 7.904222 | 8.312582 | 8.364053 | 10.45108 | 9.824217 | 10.39742 | 7.838223 | 0.897   | 0.181    | 7.55E-09 | 3.20E-08 | 10.78347 | 6  |
| 4867_at   | YGR122W         | 6.066464 | 5.777933 | 4.853278 | 5.419072 | 5.43393  | 4.978906 | 4.961492 | 5.115531 | 5.435243 | 4.857063 | 5.164946 | 5.466764 | 5.885241 | 5.554857 | 6.152397 | 5.155567 | 0.0683  | 0.154    | 0.0345   | 0.004659 | 1.604298 | 13 |
| 4868_at   | YGR123C PPT1    | 6.047403 | 6.52112  | 5.307019 | 5.957569 | 6.115336 | 5.840661 | 5.495641 | 5.717979 | 5.778483 | 5.871162 | 5.836807 | 5.760998 | 5.009346 | 5.186819 | 4.893337 | 5.771917 | -0.224  | -0.076   | 0.00482  | 0.000827 | 1.811341 | 16 |
| 4869_at   | YGR124W ASN2    | 8.89511  | 9.279116 | 8.920874 | 8.182558 | 8.367001 | 8.510212 | 7.98584  | 8.250193 | 8.25842  | 8.589895 | 8.342988 | 8.358275 | 8.691865 | 8.529312 | 8.588396 | 8.212149 | -0.0771 | 0.163    | 0.00173  | 0.00034  | 1.677302 | 14 |
| 4870_at   | YGR125W         | 6.948942 | 7.34929  | 7.040584 | 8.327742 | 7.968092 | 7.920247 | 8.481222 | 8.478709 | 8.659364 | 8.329222 | 8.227562 | 9.243617 | 7.326455 | 7.796937 | 8.084259 | 8.616266 | -0.165  | -0.328   | 0.000107 | 3.22E-05 | 2.884747 | 10 |
| 4871_at   | YGR126W         | 3.398597 | 3.16184  | 2.90921  | 3.276525 | 3.264736 | 3.622247 | 3.113945 | 3.474049 | 3.449989 | 3.2477   | 3.305226 | 3.409794 | 3.601432 | 3.213458 | 3.143201 | 3.316738 | 0.023   | -0.0437  | 0.284    | 0.030625 | 1.150928 | 13 |
| 4872_at   | YGR127W         | 6.77937  | 6.974466 | 6.547129 | 7.654218 | 7.585884 | 7.842972 | 8.157463 | 8.316691 | 8.177997 | 8.046158 | 8.001045 | 8.185752 | 7.868814 | 7.379987 | 7.968947 | 8.178694 | 0.239   | -0.254   | 1.61E-05 | 6.86E-06 | 7.17526  | 9  |
| 4873_at   | YGR128C UTP8    | 6.75451  | 6.91491  | 6.547806 | 5.846386 | 5.968838 | 5.817423 | 5.414864 | 5.84294  | 5.380787 | 5.19717  | 5.048838 | 4.348546 | 6.63162  | 4.259637 | 4.957302 | 5.149704 | -0.601  | 0.129    | 1.67E-07 | 2.42E-07 | 4.915356 | 18 |
| 4874_at   | YGR129W SYF2    | 5.839187 | 6.087637 | 6.064719 | 6.191767 | 6.068526 | 5.792643 | 6.155196 | 6.503715 | 6.138574 | 5.902763 | 5.2842   | 5.465368 | 4.460131 | 4.34319  | 4.594659 | 5.78505  | -0.432  | -0.15    | 2.52E-05 | 9.85E-06 | 3.145759 | 17 |
| 4875_at   | YGR130C         | 4.434585 | 4.56072  | 3.804588 | 5.017712 | 4.757082 | 4.849848 | 4.088166 | 5.475045 | 5.308762 | 5.126257 | 5.187891 | 4.845106 | 4.711726 | 4.926623 | 5.922866 | 5.291905 | -0.151  | -0.202   | 0.000267 | 6.92E-05 | 2.07832  | 9  |
| 4876_at   | YGR131C         | 8.952333 | 8.796584 | 9.012774 | 9.15116  | 9.195006 | 9.076642 | 8.860378 | 9.013683 | 9.818419 | 8.42097  | 8.175224 | 9.164212 | 8.944729 | 9.01837  | 9.239303 | 8.921128 | -0.0314 | 0.00424  | 0.834    | 0.080702 | 1.086674 | 13 |
| 4877_at   | YGR132C PHB1    | 7.985658 | 7.859267 | 7.0891   | 8.165517 | 8.310996 | 7.917949 | 8.868726 | 8.15304  | 8.775304 | 8.885913 | 8.484233 | 8.601489 | 7.96508  | 7.453291 | 7.653334 | 8.366936 | 0.029   | -0.285   | 0.000557 | 0.000129 | 2.088819 | 12 |
| 4878_at   | YGR133W PEK4    | 5.130516 | 4.998292 | 5.110679 | 5.731945 | 5.463879 | 5.872241 | 6.153365 | 6.198022 | 6.051984 | 6.611132 | 6.630194 | 6.989145 | 5.726233 | 5.891415 | 5.537843 | 6.427133 | 0.224   | -0.289   | 2.75E-05 | 1.06E-05 | 2.88854  | 10 |
| 4879_at   | YGR134W CAF130  | 5.636752 | 5.710942 | 5.574222 | 5.397768 | 5.321622 | 5.484234 | 5.324984 | 5.706413 | 5.489301 | 5.176316 | 5.633813 | 5.470569 | 5.21046  | 5.496079 | 5.243089 | 5.417719 | -0.0743 | 0.0142   | 0.0914   | 0.011114 | 1.217628 | 13 |
| 4880_at   | YGR135W PRE9    | 8.730837 | 8.955093 | 9.344778 | 8.636592 | 8.855718 | 8.770854 | 8.711509 | 8.648026 | 8.598661 | 8.681499 | 8.256436 | 8.771855 | 8.895962 | 7.88163  | 8.29437  | 8.582492 | -0.243  | -0.0192  | 0.000286 | 7.32E-05 | 1.905697 | 16 |
| 4881_at   | YGR136W LSB1    | 9.787381 | 9.723513 | 8.924971 | 9.508929 | 9.379334 | 9.126344 | 9.340353 | 9.378577 | 9.49392  | 9.696662 | 9.935263 | 8.915621 | 9.184856 | 8.6049   | 8.488974 | 9.413894 | -0.231  | -0.131   | 0.0058   | 0.00097  | 2.030688 | 15 |
| 4882_g_at | YGR136W LSB1    | 8.207959 | 8.269697 | 8.192272 | 8.180308 | 8.130805 | 7.886847 | 9.25249  | 7.889761 | 7.797485 | 8.222552 | 8.333418 | 7.754306 | 7.183058 | 7.853498 | 7.425351 | 7.734854 | -0.163  | -0.0347  | 0.0146   | 0.002166 | 1.538612 | 16 |
| 4883_at   | YGR137W         | 5.218422 | 5.746137 | 5.820139 | 5.701084 | 5.358936 | 5.427257 | 5.133959 | 5.218671 | 4.921659 | 5.427246 | 5.362734 | 5.958019 | 4.785712 | 5.338244 | 5.307041 | 5.360176 | -0.0849 | 0.00171  | 0.45     | 0.046336 | 1.25234  | 13 |
| 4884_i_at | YGR138C TPO2    | 7.618814 | 7.496789 | 8.331333 | 8.479383 | 8.378166 | 8.373023 | 8.716991 | 8.918881 | 8.607676 | 10.2087  | 9.872994 | 10.54981 | 11.78099 | 11.85684 | 11.76895 | 9.495177 | 1.09    | 0.0807   | 1.48E-09 | 1.27E-08 | 17.86541 | 6  |
| 4885_at   | YGR139W         | 3.068905 | 3.073694 | 2.776225 | 2.94497  | 3.262921 | 3.330402 | 3.351128 | 3.156247 | 3.416417 | 3.518716 | 3.272011 | 3.240287 | 3.791549 | 4.02197  | 3.925698 | 3.345557 | 0.23    | 0.0278   | 3.63E-05 | 1.33E-05 | 1.841681 | 8  |
| 4886_at   | YGR140W CBF2    | 4.688846 | 5.024419 | 4.676757 | 4.81098  | 4.577747 | 4.77244  | 4.56232  | 4.967945 | 4.809717 | 5.174652 | 4.817875 | 5.08035  | 6.860191 | 6.804221 | 6.356084 | 4.923648 | 0.467   | 0.225    | 3.27E-08 | 8.33E-08 | 8.876138 | 8  |
| 4887_at   | YGR141W VP562   | 6.888649 | 6.50015  | 5.670783 | 6.755969 | 6.712    |          |          |          |          |          |          |          |          |          |          |          |         |          |          |          |          |    |

|           |                |          |          |          |          |          |          |          |          |          |          |          |          |          |          |          |          |          |          |          |          |          |    |
|-----------|----------------|----------|----------|----------|----------|----------|----------|----------|----------|----------|----------|----------|----------|----------|----------|----------|----------|----------|----------|----------|----------|----------|----|
| 4918_at   | YGR082W TOM20  | 9.871247 | 10.02219 | 9.709436 | 10.12494 | 10.24556 | 9.876961 | 9.707789 | 9.693755 | 9.395628 | 9.454253 | 9.924219 | 9.474871 | 9.524248 | 9.416328 | 9.781335 | -0.137   | -0.0241  | 0.0221   | 0.003125 | 1.437619 | 16       |    |
| 4919_at   | YGR083C GCD2   | 9.565744 | 6.543164 | 6.113485 | 6.175509 | 6.017907 | 5.812683 | 6.080924 | 6.015647 | 5.401358 | 5.735778 | 5.634904 | 5.600652 | 5.424445 | 5.218373 | 5.45841  | 5.71692  | -0.212   | 0.025    | 0.0013   | 0.000266 | 1.753145 | 16 |
| 4920_at   | YGR084C RRP13  | 6.384633 | 6.51834  | 6.095652 | 6.939861 | 7.293257 | 6.82795  | 6.790647 | 6.658172 | 6.050539 | 6.159002 | 5.699629 | 5.733699 | 5.362528 | 5.0941   | 5.034261 | 6.368244 | -0.376   | -0.158   | 0.000327 | 1.81E-05 | 2.846474 | 15 |
| 4921_i_at | YGR085C MLP11B | 12.25363 | 12.31994 | 12.61657 | 12.31062 | 12.37474 | 12.15126 | 11.96524 | 11.94163 | 11.25221 | 11.15049 | 11.32991 | 11.11695 | 10.76151 | 11.14274 | 11.00922 | 11.54121 | -0.416   | 0.0468   | 4.32E-05 | 1.53E-05 | 3.011853 | 16 |
| 4922_at   | YGR086C PIL1   | 8.926288 | 9.301515 | 8.54199  | 9.505332 | 8.783843 | 8.859649 | 9.188543 | 9.533671 | 9.298295 | 8.422516 | 9.030814 | 9.140196 | 8.700711 | 7.32376  | 7.493526 | 9.065699 | -0.355   | -0.231   | 0.000003 | 1.14E-05 | 3.150219 | 15 |
| 4923_at   | YGR087C PDC6   | 6.019243 | 5.819625 | 6.042305 | 7.146509 | 7.026348 | 7.980727 | 8.513614 | 8.98134  | 8.420132 | 6.752303 | 7.13263  | 6.840255 | 5.986639 | 5.785017 | 6.380772 | 7.884626 | -0.0646  | -0.518   | 0.000457 | 0.001009 | 3.743327 | 11 |
| 4924_at   | YGR088W CTT1   | 7.873795 | 7.239067 | 7.197004 | 10.17388 | 9.689571 | 9.583613 | 10.60916 | 10.5944  | 10.62711 | 10.5783  | 10.59063 | 11.13473 | 8.706631 | 8.314622 | 9.136351 | 10.86406 | 0.327    | -0.763   | 1.59E-08 | 5.06E-08 | 10.73032 | 11 |
| 4925_at   | YGR089W NNF2   | 3.192108 | 3.602356 | 3.601815 | 3.687278 | 4.148122 | 3.935378 | 4.244629 | 3.891087 | 4.036405 | 3.867197 | 3.730923 | 3.789227 | 2.966735 | 2.906893 | 3.271372 | 3.956576 | -0.127   | -0.196   | 2.95E-05 | 1.12E-05 | 1.951631 | 12 |
| 4926_at   | YGR090W UTP22  | 7.305848 | 7.601434 | 7.213336 | 6.999314 | 6.860364 | 7.177548 | 6.445716 | 6.399677 | 6.330075 | 5.964077 | 6.200473 | 6.166555 | 5.684829 | 6.062328 | 6.014712 | 6.300191 | -0.401   | 0.1      | 3.18E-06 | 2.01E-06 | 2.892016 | 16 |
| 4927_at   | YGR091W PRP31  | 5.205695 | 5.30277  | 5.04804  | 5.248024 | 5.389032 | 5.149666 | 4.890199 | 5.425432 | 5.156285 | 4.932644 | 4.804768 | 4.533605 | 4.504904 | 4.376098 | 4.369276 | 4.99097  | -0.226   | -0.0488  | 0.000115 | 3.43E-05 | 1.81921  | 16 |
| 4928_at   | YGR092W DBF2   | 6.162526 | 6.726217 | 6.031345 | 5.987606 | 6.00023  | 6.035006 | 5.227188 | 5.781021 | 5.525921 | 5.155516 | 4.978484 | 4.937219 | 5.211512 | 5.276549 | 5.44032  | 5.322494 | -0.305   | 0.14     | 0.0002   | 5.43E-05 | 2.291804 | 14 |
| 4929_at   | YGR093W        | 7.118892 | 7.364842 | 6.526706 | 6.752035 | 6.949849 | 6.688288 | 7.087432 | 7.476797 | 7.224397 | 7.219543 | 7.15114  | 6.975145 | 6.502892 | 6.673164 | 6.921279 | 7.084542 | -0.0548  | -0.0699  | 0.211    | 0.023477 | 1.290815 | 13 |
| 4930_at   | YGR094W VAS1   | 9.007379 | 9.203816 | 8.697143 | 7.857635 | 8.143764 | 8.125286 | 7.92204  | 8.156729 | 7.849819 | 7.85986  | 7.584283 | 7.860593 | 7.636128 | 7.212297 | 7.462155 | 7.749541 | -0.371   | 0.12     | 3.57E-06 | 2.18E-06 | 2.676026 | 14 |
| 4931_at   | YGR095C RRP46  | 8.467134 | 8.67959  | 8.590313 | 8.433382 | 8.482262 | 8.336676 | 8.077655 | 8.44778  | 8.040256 | 7.83539  | 8.02192  | 7.834109 | 6.995584 | 7.237261 | 7.135082 | 8.049443 | -0.382   | -0.0532  | 1.95E-08 | 5.83E-08 | 2.756241 | 16 |
| 4932_at   | YGR096W TPC1   | 5.998161 | 6.077565 | 6.020773 | 6.091773 | 6.249465 | 6.371538 | 6.111962 | 6.182184 | 6.141274 | 6.065198 | 6.108007 | 6.154891 | 5.690916 | 5.554998 | 5.824987 | 6.16406  | -0.093   | -0.0817  | 2.02E-05 | 8.24E-06 | 1.416951 | 12 |
| 4933_at   | YGR097W ASK10  | 8.301547 | 8.30765  | 7.983534 | 7.856258 | 7.809885 | 8.058701 | 8.018551 | 8.221062 | 8.236601 | 7.986366 | 8.504448 | 8.564037 | 8.165909 | 8.395205 | 8.454253 | 8.168463 | 0.0701   | 0.0218   | 0.268    | 0.029049 | 1.204171 | 13 |
| 4934_at   | YGR053C        | 5.3763   | 5.190245 | 5.226625 | 5.928902 | 6.006965 | 5.524874 | 6.016908 | 5.920642 | 5.740284 | 5.686473 | 5.538832 | 5.616545 | 5.474278 | 5.305604 | 5.075756 | 5.824921 | -0.0247  | -0.147   | 0.00179  | 0.000351 | 1.464892 | 12 |
| 4935_at   | YGR054W        | 7.009695 | 6.861758 | 5.901413 | 6.498729 | 6.561761 | 6.491376 | 6.745131 | 6.977111 | 6.855388 | 6.99426  | 6.791615 | 6.790187 | 5.760878 | 5.3868   | 5.627547 | 6.749975 | -0.214   | -0.187   | 0.00104  | 0.00022  | 2.25185  | 15 |
| 4936_at   | YGR055W MUP1   | 8.649341 | 8.591168 | 7.70265  | 8.541481 | 8.435334 | 7.742123 | 6.769112 | 7.199533 | 6.292174 | 6.997917 | 6.815438 | 6.222144 | 6.641862 | 6.589007 | 6.485924 | 6.934109 | -0.506   | 0.154    | 0.00287  | 0.000524 | 3.823707 | 18 |
| 4937_at   | YGR056W LSC1   | 6.316373 | 6.463743 | 6.324846 | 6.402024 | 6.224832 | 6.215559 | 6.920433 | 5.737793 | 5.88636  | 6.667048 | 6.009476 | 6.089677 | 5.917374 | 6.269182 | 5.890616 | 6.938508 | -0.0997  | 0.0738   | 0.0204   | 0.002912 | 1.403338 | 13 |
| 4938_at   | YGR057C RST7   | 6.638829 | 6.4445   | 5.815691 | 6.250097 | 6.529936 | 5.873376 | 6.607492 | 6.460594 | 6.525441 | 6.97753  | 6.813475 | 6.284384 | 5.293404 | 5.431424 | 5.345411 | 6.502289 | -0.19    | -0.198   | 0.00021  | 0.000421 | 2.192355 | 15 |
| 4939_at   | YGR058W PEF1   | 4.949684 | 4.948247 | 4.163025 | 4.853693 | 4.723623 | 4.908423 | 4.66311  | 5.152805 | 5.153421 | 5.182983 | 5.051787 | 4.816838 | 4.583678 | 4.495875 | 4.764714 | 4.990372 | -0.00742 | -0.095   | 0.0981   | 0.011837 | 1.267956 | 13 |
| 4940_at   | YGR059W SPR3   | 3.15061  | 2.942407 | 2.988522 | 3.519288 | 3.751004 | 4.025937 | 4.264864 | 4.364227 | 4.064262 | 3.982874 | 3.458399 | 3.482965 | 3.735857 | 3.922666 | 4.666839 | 3.999506 | 0.22     | -0.113   | 0.0324   | 0.004001 | 1.872736 | 9  |
| 4941_at   | YGR060W ERG25  | 11.97156 | 11.987   | 11.72616 | 12.20952 | 12.38552 | 12.29636 | 12.41019 | 12.64458 | 12.58375 | 12.78599 | 12.7332  | 12.70833 | 11.96828 | 12.05549 | 12.04049 | 12.64343 | 0.056    | -0.191   | 3.82E-06 | 2.30E-06 | 1.736382 | 12 |
| 4942_at   | YGR061C ADE6   | 8.978037 | 9.226479 | 9.106637 | 8.335546 | 8.254101 | 8.67107  | 8.016937 | 8.408246 | 7.974157 | 8.018369 | 8.593639 | 8.283899 | 8.111074 | 7.790335 | 7.768601 | 8.26508  | -0.255   | 0.0575   | 0.00739  | 0.001197 | 1.966431 | 16 |
| 4943_at   | YGR062C COX18  | 8.706349 | 8.770772 | 8.513205 | 9.09669  | 9.527295 | 9.147328 | 9.0819   | 8.862249 | 8.881351 | 9.093539 | 8.908387 | 8.695475 | 9.284405 | 9.122171 | 9.272069 | 9.03525  | 0.108    | -0.0185  | 0.0576   | 0.007365 | 1.337023 | 13 |
| 4944_at   | YGR063C SPT4   | 8.796542 | 8.661311 | 8.634847 | 8.916815 | 8.536742 | 9.368758 | 8.170158 | 8.740581 | 8.578881 | 7.974396 | 8.679209 | 8.814399 | 8.140319 | 8.284028 | 8.438504 | 8.5925   | -0.128   | -0.022   | 0.164    | 0.018681 | 1.403229 | 16 |
| 4945_at   | YGR064W        | 6.37657  | 5.919733 | 5.979651 | 5.773657 | 6.098225 | 6.40495  | 6.043658 | 6.013419 | 6.300614 | 5.821465 | 6.112157 | 5.602434 | 5.553414 | 5.812129 | 5.778883 | 5.955976 | -0.157   | 0.013    | 0.0143   | 0.00213  | 1.515294 | 16 |
| 4946_at   | YGR065C VHT1   | 8.08592  | 8.079114 | 6.992768 | 9.421267 | 9.642075 | 9.02871  | 10.03291 | 9.878685 | 9.951053 | 8.181014 | 8.312665 | 8.303482 | 7.152926 | 6.506319 | 9.265089 | -0.358   | -0.534   | 0.000229 | 6.07E-05 | 6.333788 | 16       |    |
| 4947_at   | YGR066C        | 4.927919 | 4.927384 | 4.561988 | 6.504255 | 5.482455 | 5.762418 | 6.48254  | 6.434421 | 6.529385 | 5.992801 | 6.243187 | 6.293586 | 5.725857 | 6.264358 | 5.853112 | 6.323063 | 0.28     | -0.262   | 0.001099 | 3.29E-05 | 2.954236 | 10 |
| 4948_at   | YGR067C        | 3.553284 | 3.343922 | 3.256709 | 3.779159 | 3.678349 | 3.704103 | 3.680723 | 4.05338  | 3.794352 | 3.68873  | 3.75267  | 3.674833 | 4.027946 | 3.729196 | 3.658878 | 3.810091 | 0.0892   | -0.0571  | 0.0175   | 0.00254  | 1.35222  | 13 |
| 4949_at   | YGR068C        | 5.877753 | 5.128446 | 4.499654 | 5.184307 | 4.922468 | 5.236387 | 5.263088 | 5.648159 | 5.458882 | 5.299725 | 5.205276 | 5.538485 | 4.917703 | 4.938373 | 5.043356 | 5.434107 | 0.0145   | -0.127   | 0.0359   | 0.004823 | 1.392491 | 12 |
| 4950_at   | YGR069W        | 3.694776 | 3.597629 | 3.521554 | 3.805272 | 3.736936 | 3.883579 | 3.253851 | 3.691225 | 3.622757 | 3.40297  | 3.568958 | 3.186923 | 3.464535 | 3.587021 | 3.612022 | 3.531022 | -0.0431  | 0.0184   | 0.481    | 0.049124 | 1.121003 | 13 |
| 4951_at   | YGR070W ROM1   | 6.263838 | 6.271026 | 6.06319  | 6.524194 | 6.505525 | 6.280433 | 6.513191 | 6.80253  | 6.754289 | 5.902386 | 6.378863 | 6.261862 | 6.034489 | 6.249765 | 6.061887 | 6.649063 | -0.0542  | -0.078   | 0.0721   | 0.008999 | 1.313709 | 13 |
| 4952_at   | YGR071C        | 4.85189  | 4.709516 | 3.970023 | 4.551528 | 4.536313 | 4.280542 | 4.599216 | 4.635215 | 4.350822 | 4.096726 | 3.966907 | 4.035424 | 3.515498 | 3.848773 | 3.585231 | 4.280352 | -0.229   | -0.0624  | 0.000573 | 0.00132  | 1.834339 | 16 |
| 4953_at   | YGR072W UFP3   | 5.212771 | 5.539653 | 5.405451 | 5.296159 | 5.136393 | 5.108115 | 5.57774  | 5.611118 | 4.888009 | 5.594811 | 4.94695  | 4.765985 | 4.87892  | 4.637345 | 5.079599 | 5.179721 | -0.107   | -0.00159 | 0.181    | 0.020386 | 1.327995 | 13 |
| 4954_at   | YGR073C        | 6.165999 | 6.270044 | 6.025148 | 6.039392 | 6.03658  | 6.084839 | 5.824856 | 5.887761 | 5.733499 | 5.599352 | 5.385019 | 5.510626 | 6.0138   | 6.273284 | 5.59893  | 5.69854  | -0.0865  | 0.103    | 0.0157   | 0.002309 | 1.475883 | 13 |
| 4955_at   | YGR074W SMD1   | 7.27952  | 7.070305 | 6.637969 | 6.327587 | 6.664818 | 6.499915 | 6.600895 | 6.534666 | 6.191617 | 6.277997 | 5.772274 | 5.796229 | 5.183307 | 5.12646  | 4.987228 | 6.132591 | -0.493   | -0.0268  | 3.18E-07 | 3.69E-07 | 3.696542 | 18 |
| 4956_at   | YGR078W MSP1   | 6.580102 | 6.619082 | 5.598909 | 6.670966 | 6.80193  | 6.465493 | 6.832882 | 6.995294 | 6.936776 | 6.736162 | 6.855178 | 6.928218 | 6.066752 | 6.41094  | 6.422084 | 6.85404  | -0.04005 | -0.156   | 0.0139   | 0.002079 | 1.463961 | 12 |
| 4957_at   | YGR030C POP6   | 6.476939 | 6.808142 | 6.505641 | 6.956198 | 6.699469 | 6.841205 | 6.982074 | 7.126812 | 6.912879 | 7.511702 | 7.669603 | 7.968659 | 8.221399 | 8.226097 | 8.637769 | 7.361775 | 0.489    | 0.0288   | 1.68E-07 | 2.43E-07 | 3.659607 | 7  |
| 4958_at   | YGR031W        | 7.939397 | 7.30914  | 6.479847 | 6.881307 | 6.689657 | 6.842157 | 7.128439 | 7.4312   | 7.022635 | 7.714418 | 7.600939 | 6.975367 | 8.403142 | 7.906933 | 8.491719 | 7.190492 | 0.259    | 0.133    | 0.0143   | 0.002131 | 2.152967 | 8  |
| 4959_at   | YGR032W GSC2   | 8.035644 | 8.151549 | 7.394574 | 8.728133 | 8.857103 |          |          |          |          |          |          |          |          |          |          |          |          |          |          |          |          |    |

|           |                |          |          |          |          |          |          |          |          |          |          |          |          |          |          |          |          |          |          |          |          |          |    |
|-----------|----------------|----------|----------|----------|----------|----------|----------|----------|----------|----------|----------|----------|----------|----------|----------|----------|----------|----------|----------|----------|----------|----------|----|
| 4990_at   | YGR017C        | 7.205683 | 7.332351 | 7.282308 | 7.081397 | 7.163593 | 7.011707 | 6.83491  | 6.533023 | 6.586809 | 6.452463 | 6.040141 | 6.610408 | 5.637598 | 5.328762 | 5.699211 | 6.542972 | -0.456   | -0.0322  | 2.53E-07 | 3.09E-07 | 3.345159 | 16 |
| 4991_at   | YGR018C        | 6.039038 | 6.209619 | 5.85766  | 5.607801 | 5.953308 | 5.87855  | 5.65108  | 5.700999 | 5.671518 | 5.546785 | 5.833671 | 5.514958 | 5.632633 | 5.555907 | 5.703522 | 5.643929 | -0.104   | 0.0522   | 0.00309  | 0.000559 | 1.342142 | 13 |
| 4992_at   | YGR019W UGA1   | 6.481094 | 6.724235 | 6.599138 | 7.791862 | 7.870006 | 7.913972 | 8.570397 | 7.776272 | 9.00079  | 6.64479  | 6.690125 | 7.372019 | 5.784776 | 5.92568  | 6.433984 | 7.80034  | -0.256   | -0.395   | 0.00206  | 0.000397 | 3.855974 | 17 |
| 4993_at   | YGR020C VMA7   | 9.936867 | 10.22337 | 10.03905 | 10.15927 | 10.06143 | 9.888077 | 9.526461 | 9.632056 | 9.66368  | 8.851999 | 9.083217 | 9.397024 | 8.080059 | 8.309711 | 8.487832 | 9.412131 | -0.49    | -0.061   | 2.11E-07 | 2.79E-07 | 3.666172 | 18 |
| 4994_at   | YGR021W        | 7.403789 | 7.243368 | 7.501459 | 8.148005 | 8.480710 | 7.935117 | 7.872433 | 7.900506 | 7.625867 | 7.247813 | 6.842926 | 6.533518 | 6.085872 | 6.133688 | 5.950213 | 7.527617 | -0.433   | -0.209   | 9.23E-05 | 2.86E-05 | 3.516697 | 17 |
| 4995_at   | YGR022C        | 5.528328 | 5.51026  | 5.757976 | 5.593797 | 5.484094 | 5.45466  | 5.067557 | 5.07855  | 5.112808 | 5.211755 | 5.631272 | 5.00375  | 4.858801 | 5.43067  | 5.541289 | 5.248268 | -0.00487 | 0.101    | 0.0487   | 0.006334 | 1.287698 | 13 |
| 4996_at   | YGR023W MTL1   | 3.535381 | 3.286487 | 2.923704 | 3.598709 | 3.315631 | 3.589316 | 3.682429 | 4.03542  | 4.059529 | 4.658586 | 4.335379 | 4.482597 | 5.077686 | 4.513969 | 5.438845 | 4.171356 | 0.49     | -0.0166  | 9.34E-06 | 4.51E-06 | 3.662383 | 7  |
| 4997_at   | YGR024C THG1   | 8.271807 | 8.210036 | 7.706419 | 7.963384 | 8.186482 | 7.863958 | 8.085012 | 8.357753 | 8.202617 | 8.27793  | 8.194264 | 8.165068 | 6.937397 | 7.193952 | 7.812582 | 8.155767 | -0.164   | -0.133   | 0.00286  | 0.000524 | 1.802516 | 15 |
| 4998_at   | YGR025W        | 4.829755 | 4.72282  | 3.670518 | 4.551225 | 4.063651 | 4.930584 | 3.925283 | 4.465844 | 4.738951 | 3.851434 | 4.491173 | 3.959362 | 3.97531  | 4.198745 | 5.364803 | 4.292518 | -0.00977 | 0.0508   | 0.833    | 0.08064  | 1.148586 | 13 |
| 4999_at   | YGR026W        | 8.190077 | 8.487117 | 7.647463 | 8.230288 | 8.133974 | 7.813804 | 8.555183 | 8.363108 | 8.383483 | 7.926325 | 7.812029 | 8.369637 | 6.159891 | 6.416406 | 6.246659 | 8.149423 | -0.448   | -0.268   | 1.49E-06 | 1.15E-06 | 4.064998 | 17 |
| 5000_i_at | YGR027C RPS25A | 10.02096 | 10.14313 | 11.07968 | 9.820447 | 9.744927 | 10.56058 | 9.311717 | 9.573379 | 9.504347 | 8.335928 | 7.989043 | 9.20754  | 7.649693 | 7.05064  | 6.584788 | 9.039389 | -0.743   | 0.0212   | 7.62E-05 | 2.45E-05 | 7.167106 | 18 |
| 5001_f_at | YGR027C RPS25A | 11.40056 | 11.7116  | 12.07739 | 11.30257 | 11.38251 | 11.85293 | 10.92411 | 11.20682 | 11.23419 | 10.26425 | 10.31405 | 10.78127 | 9.927918 | 8.95482  | 10.37492 | 10.83094 | -0.474   | 0.0243   | 1.66E-05 | 7.02E-06 | 3.515728 | 18 |
| 5002_at   | YGL015C        | 3.243954 | 3.249183 | 3.223654 | 3.39019  | 3.748741 | 3.487123 | 3.143451 | 3.274281 | 3.104861 | 3.242662 | 3.148828 | 3.147558 | 6.05372  | 4.569074 | 4.981275 | 3.316005 | 0.439    | 0.258    | 0.000117 | 3.48E-05 | 3.918178 | 8  |
| 5003_at   | YGL014W PUF4   | 7.253527 | 7.428129 | 6.968083 | 7.03784  | 6.909932 | 6.966966 | 6.878896 | 6.683232 | 6.651603 | 6.807203 | 6.759532 | 7.187692 | 7.480445 | 7.363883 | 8.255059 | 6.840826 | 0.125    | 0.168    | 0.00152  | 0.000305 | 1.828095 | 8  |
| 5004_at   | YGL013C PDR1   | 6.830574 | 6.898557 | 6.089028 | 7.070488 | 6.85874  | 6.610254 | 7.448244 | 7.3621   | 7.329252 | 8.035026 | 8.338386 | 8.35891  | 9.134416 | 8.525372 | 8.936823 | 7.748019 | 0.641    | -0.0112  | 1.83E-06 | 1.33E-06 | 5.472092 | 6  |
| 5005_at   | YGL012W ERG4   | 10.6828  | 10.52171 | 10.3942  | 11.1199  | 10.89193 | 10.69705 | 11.14367 | 10.74203 | 11.18638 | 10.44547 | 10.38798 | 10.49304 | 8.675051 | 8.638545 | 9.344655 | 10.75681 | -0.442   | -0.286   | 9.27E-08 | 1.64E-07 | 4.517293 | 17 |
| 5006_at   | YGL011C SCL1   | 8.389973 | 8.476535 | 8.596467 | 8.706247 | 8.410975 | 8.536547 | 8.557995 | 8.223887 | 8.817153 | 8.471876 | 8.701961 | 9.457275 | 8.418351 | 8.391671 | 9.116796 | 8.722354 | 0.0699   | -0.0458  | 0.425    | 0.04397  | 1.250061 | 13 |
| 5007_at   | YGL010W        | 7.22403  | 7.264289 | 7.492891 | 7.562402 | 7.374548 | 7.518465 | 9.06111  | 8.024158 | 7.95713  | 8.219963 | 8.335751 | 8.289362 | 9.278465 | 9.101553 | 9.12167  | 8.078033 | 0.491    | 0.0427   | 5.04E-09 | 2.47E-08 | 3.671403 | 7  |
| 5008_at   | YGL009C LEU1   | 9.120594 | 9.290372 | 8.72508  | 9.787943 | 8.455593 | 7.948645 | 6.191593 | 9.170051 | 9.551964 | 9.329351 | 9.16469  | 9.074048 | 8.844591 | 8.327638 | 8.951243 | 8.924924 | -0.00645 | -0.0308  | 0.934    | 0.083985 | 1.085272 | 13 |
| 5009_at   | YGL008C PMA1   | 11.25218 | 11.1658  | 9.981161 | 10.82199 | 10.8978  | 10.78809 | 11.28184 | 11.39622 | 11.47023 | 11.04163 | 11.19099 | 11.15425 | 11.47276 | 11.11377 | 12.19986 | 11.19447 | 0.197    | -0.0016  | 0.0999   | 0.012029 | 1.687289 | 13 |
| 5010_at   | YGL007W BRP1   | 5.625297 | 5.465909 | 5.293186 | 5.415344 | 5.508217 | 5.900986 | 5.238544 | 5.541778 | 5.522699 | 5.27577  | 5.537061 | 5.307018 | 5.569161 | 5.596135 | 6.445789 | 5.464314 | 0.0886   | 0.0652   | 0.11     | 0.013078 | 1.354104 | 13 |
| 5011_at   | YGL006W PMC1   | 7.224149 | 7.271912 | 6.886401 | 7.293727 | 7.374251 | 7.301876 | 7.558864 | 7.796173 | 7.246491 | 8.809965 | 8.470469 | 8.24061  | 11.03319 | 10.03474 | 10.41502 | 8.032083 | 0.91     | 0.202    | 6.57E-09 | 2.96E-08 | 11.16041 | 6  |
| 5012_at   | YGL005C COG7   | 5.369307 | 5.221209 | 4.925043 | 5.392246 | 5.598629 | 5.332789 | 5.120106 | 5.464634 | 5.363643 | 5.48243  | 5.212365 | 5.619931 | 5.492177 | 4.690356 | 5.357503 | 5.426075 | 0.00133  | -0.0671  | 0.271    | 0.029373 | 1.178785 | 13 |
| 5013_at   | YGL004C RPN14  | 6.340232 | 6.714904 | 6.24215  | 6.615837 | 6.821729 | 6.662138 | 6.444755 | 6.623658 | 6.528218 | 5.983853 | 5.728293 | 5.899515 | 6.247258 | 5.810497 | 5.719551 | 6.288567 | -0.194   | -0.0224  | 0.0173   | 0.002518 | 1.671839 | 16 |
| 5014_at   | YGL003C CDH1   | 5.120682 | 5.113572 | 4.590363 | 5.092064 | 4.901873 | 5.209304 | 5.239636 | 5.043483 | 5.161695 | 5.924187 | 5.721152 | 6.287753 | 6.650808 | 6.350856 | 6.693501 | 5.635948 | 0.452    | 0.0254   | 6.08E-06 | 3.26E-06 | 3.313931 | 7  |
| 5015_at   | YGL002W ERP6   | 7.214417 | 7.258499 | 7.088507 | 6.909209 | 7.100672 | 7.240934 | 7.38235  | 7.290906 | 7.136627 | 7.456111 | 7.258068 | 7.204415 | 6.548523 | 6.700562 | 7.164502 | 7.233898 | -0.0717  | -0.0673  | 0.0403   | 0.005352 | 1.311615 | 13 |
| 5016_at   | YGL001C ERG26  | 10.99874 | 10.83264 | 10.50641 | 11.15477 | 11.34755 | 11.16349 | 11.25336 | 11.35083 | 11.24654 | 11.52808 | 11.24536 | 11.2085  | 10.17044 | 10.17347 | 10.12467 | 11.33548 | -0.047   | -0.239   | 3.45E-07 | 3.92E-07 | 2.238212 | 15 |
| 5017_at   | YGR001C AML2   | 5.622087 | 5.860288 | 5.995381 | 6.196734 | 5.930427 | 6.012263 | 5.902393 | 6.056463 | 5.799633 | 5.864775 | 5.904365 | 6.514524 | 5.361042 | 5.613439 | 5.377396 | 6.040874 | -0.184   | -0.11    | 0.00694  | 0.001136 | 1.491183 | 12 |
| 5018_at   | YGR001C AML1   | 4.862574 | 4.907414 | 4.292077 | 4.905616 | 4.821303 | 4.8218   | 4.90437  | 5.115088 | 4.966675 | 4.751147 | 4.889693 | 5.039739 | 3.919221 | 3.872167 | 4.081257 | 4.930609 | -0.176   | -0.169   | 1.48E-05 | 6.39E-06 | 1.999243 | 15 |
| 5019_at   | YGR002C SMC4   | 5.64575  | 5.871371 | 5.054504 | 5.638301 | 5.683706 | 5.395274 | 5.964531 | 6.008959 | 5.740853 | 5.894777 | 5.440405 | 5.646728 | 5.791211 | 5.940075 | 5.501693 | 5.822194 | 0.0488   | -0.0633  | 0.219    | 0.024236 | 1.260698 | 13 |
| 5020_at   | YGR003W CUL3   | 5.163128 | 5.237    | 4.448528 | 5.200992 | 5.044515 | 5.001645 | 5.41422  | 5.591429 | 5.386512 | 5.404522 | 5.866524 | 5.460659 | 5.27852  | 5.217807 | 5.237132 | 5.407896 | 0.1      | -0.107   | 0.0259   | 0.003607 | 1.522691 | 13 |
| 5021_at   | YGR004W PEX31  | 6.933137 | 7.131888 | 6.81342  | 6.725898 | 6.75061  | 6.979933 | 6.698711 | 6.885427 | 6.617855 | 6.845754 | 6.651284 | 6.213156 | 5.802811 | 6.129849 | 5.906134 | 6.565018 | -0.258   | -0.0532  | 0.000207 | 1.05E-05 | 1.953891 | 16 |
| 5022_at   | YGR005C TFG2   | 7.379346 | 7.276089 | 6.887759 | 6.830516 | 7.058442 | 6.744286 | 7.13266  | 7.359836 | 6.901879 | 7.542362 | 7.057137 | 6.697819 | 6.809735 | 6.915948 | 6.615073 | 7.027581 | -0.0783  | -0.0178  | 0.34     | 0.035965 | 1.230595 | 13 |
| 5023_at   | YGR006W PRP18  | 4.135983 | 4.016372 | 3.201882 | 3.66183  | 3.65677  | 3.597498 | 3.757191 | 4.025945 | 3.83352  | 3.691991 | 3.800485 | 3.45382  | 3.488932 | 3.584927 | 3.353462 | 3.735781 | -0.0572  | -0.023   | 0.456    | 0.046911 | 1.17002  | 13 |
| 5024_at   | YGL038C OCH1   | 5.774567 | 5.820135 | 5.673011 | 5.461883 | 5.44823  | 5.767806 | 5.551013 | 5.431331 | 5.616555 | 4.948427 | 5.126942 | 5.430194 | 5.672043 | 5.297566 | 5.699755 | 5.346102 | -0.0786  | 0.0874   | 0.0225   | 0.00318  | 1.401795 | 13 |
| 5025_at   | YGL037C PNC1   | 10.85021 | 11.04344 | 11.31541 | 11.46458 | 11.16721 | 11.62301 | 11.34654 | 11.64673 | 11.75174 | 10.87764 | 11.19397 | 11.31085 | 11.05587 | 11.23982 | 11.44877 | 11.44163 | -0.00487 | -0.0709  | 0.313    | 0.03385  | 1.93203  | 13 |
| 5026_at   | YGL036W        | 5.531539 | 5.770633 | 5.075552 | 5.329948 | 5.22453  | 5.418045 | 5.617232 | 5.472827 | 5.792227 | 5.628966 | 5.669742 | 5.865172 | 6.400216 | 6.332967 | 6.72579  | 5.62005  | 0.272    | 0.0941   | 4.38E-05 | 1.55E-05 | 2.056218 | 8  |
| 5027_at   | YGL035C MIG1   | 5.689939 | 5.722825 | 5.414565 | 5.525451 | 5.579762 | 5.043195 | 5.738416 | 5.898488 | 5.901255 | 5.202673 | 5.826762 | 5.215119 | 5.190129 | 5.069293 | 5.02436  | 5.65691  | -0.0932  | -0.092   | 0.112    | 0.013327 | 1.451528 | 12 |
| 5028_at   | YGL034C        | 3.760382 | 3.472109 | 3.317344 | 3.528323 | 3.331967 | 3.494489 | 3.448289 | 3.400292 | 3.458548 | 3.665285 | 3.61265  | 3.331678 | 3.500466 | 3.433996 | 3.45378  | 3.504289 | -0.00243 | -0.00565 | 0.977    | 0.093093 | 1.01772  | 13 |
| 5029_at   | YGL033W HOP2   | 3.242486 | 3.153659 | 2.927428 | 3.690364 | 3.477512 | 3.32796  | 3.025575 | 3.27611  | 3.199617 | 3.294246 | 3.227489 | 3.166471 | 3.182695 | 3.163899 | 2.984267 | 3.30101  | -0.0195  | -0.0477  | 0.258    | 0.02806  | 1.153861 | 13 |
| 5030_at   | YGL032C AGA2   | 3.400759 | 3.512701 | 3.32249  | 3.947741 | 3.805352 | 4.149966 | 3.287886 | 3.762927 | 3.538329 | 3.507233 | 3.551938 | 3.574608 | 3.303778 | 3.618327 | 3.508929 | 3.684122 | -0.00204 | -0.049   | 0.458    | 0.047097 | 1.128121 | 13 |
| 5031_at   | YGL031C RPL2A4 | 11.78464 | 12.21323 |          |          |          |          |          |          |          |          |          |          |          |          |          |          |          |          |          |          |          |    |

|           |         |       |          |          |          |          |          |          |          |          |          |          |          |          |          |          |          |          |         |          |          |          |          |    |
|-----------|---------|-------|----------|----------|----------|----------|----------|----------|----------|----------|----------|----------|----------|----------|----------|----------|----------|----------|---------|----------|----------|----------|----------|----|
| 5063_at   | YGL044C | RNA15 | 6.07447  | 6.184118 | 5.934562 | 6.112521 | 5.774209 | 5.664203 | 6.006679 | 6.257746 | 6.000516 | 5.69894  | 6.076439 | 5.974871 | 5.365061 | 5.293572 | 5.496092 | 5.93056  | -0.159  | -0.0603  | 0.00134  | 0.000273 | 1.536756 | 16 |
| 5064_at   | YGL043W | DST1  | 6.224776 | 6.197856 | 6.25633  | 5.392194 | 5.772102 | 5.738217 | 6.11091  | 6.090119 | 5.943551 | 6.737237 | 6.54934  | 5.86522  | 8.843418 | 8.135022 | 8.038119 | 6.094062 | 0.565   | 0.321    | 2.8E-07  | 3.35E-07 | 5.662149 | 5  |
| 5065_at   | YGL042C |       | 4.756253 | 4.858536 | 4.343817 | 4.235627 | 4.46264  | 4.688128 | 4.496762 | 4.708139 | 4.581593 | 4.65891  | 4.721064 | 4.044362 | 5.026718 | 5.415859 | 5.445495 | 4.507122 | 0.152   | 0.128    | 0.00237  | 0.000445 | 1.748781 | 8  |
| 5066_at   | YGL041C |       | 9.161689 | 5.064259 | 4.268321 | 4.409984 | 4.594563 | 4.681095 | 4.258291 | 4.486541 | 4.761989 | 5.328338 | 4.871309 | 4.353639 | 5.476608 | 6.607334 | 8.61115  | 4.732969 | 0.542   | 0.304    | 0.00162  | 0.000321 | 5.462786 | 5  |
| 5067_at   | YGL040C | HEM2  | 10.1667  | 9.933323 | 9.390085 | 10.01742 | 10.19829 | 9.588846 | 10.20882 | 10.38287 | 9.914285 | 10.44153 | 10.19017 | 10.14096 | 8.956348 | 8.730311 | 9.281946 | 10.16474 | -0.179  | -0.212   | 0.000634 | 0.000144 | 2.220281 | 15 |
| 5068_at   | YGL039W |       | 11.02575 | 11.04434 | 10.85495 | 10.59787 | 10.76608 | 10.78969 | 9.804874 | 9.961351 | 9.975946 | 8.947911 | 9.368041 | 9.619704 | 8.887681 | 8.532031 | 9.132175 | 9.710531 | -0.601  | 0.0646   | 2.45E-06 | 1.65E-06 | 4.922108 | 18 |
| 5069_at   | YGL082W |       | 8.166558 | 7.744295 | 6.598248 | 7.521073 | 7.651359 | 7.047698 | 7.679499 | 7.43025  | 7.707968 | 7.370005 | 7.070449 | 7.264283 | 6.523599 | 6.34893  | 6.45264  | 7.372866 | -0.272  | -0.112   | 0.00435  | 0.000755 | 2.119675 | 15 |
| 5070_at   | YGL081W |       | 4.492138 | 4.578292 | 4.525395 | 4.983765 | 4.90033  | 4.898827 | 4.997849 | 5.132209 | 4.606019 | 5.115691 | 4.846427 | 5.117213 | 4.579021 | 4.099321 | 4.42625  | 5.011975 | -0.0357 | -0.154   | 0.000371 | 9.09E-05 | 1.513913 | 12 |
| 5071_at   | YGL080W | FMP37 | 8.730755 | 8.455662 | 8.161535 | 8.26402  | 8.497014 | 8.366665 | 8.687921 | 8.714736 | 8.352596 | 8.604459 | 8.304215 | 8.277096 | 7.432978 | 6.994878 | 7.251975 | 8.431129 | -0.294  | -0.167   | 9.12E-06 | 4.42E-06 | 2.462436 | 15 |
| 5072_at   | YGL079W |       | 6.312191 | 6.370175 | 6.129933 | 6.38819  | 6.279347 | 6.452148 | 6.255356 | 6.331954 | 6.398713 | 5.99562  | 6.268321 | 6.087705 | 5.165575 | 4.950514 | 5.180399 | 6.231797 | -0.301  | -0.15    | 3.09E-09 | 1.87E-08 | 2.418862 | 15 |
| 5073_at   | YGL078C | DBP3  | 8.636896 | 8.592083 | 8.115605 | 7.673931 | 7.921935 | 7.408934 | 7.510425 | 7.732649 | 7.420559 | 7.209611 | 6.983953 | 6.528551 | 6.652563 | 6.384077 | 6.077049 | 7.147344 | -0.545  | 0.0713   | 6.87E-07 | 6.38E-07 | 4.242147 | 18 |
| 5074_at   | YGL077C | HNM1  | 8.584716 | 8.708029 | 7.807669 | 9.066762 | 9.021256 | 8.392427 | 8.982182 | 8.759699 | 8.848849 | 8.573659 | 8.720495 | 9.067745 | 8.270302 | 7.98774  | 8.467292 | 8.877876 | -0.0416 | -0.156   | 0.01079  | 0.002599 | 1.536113 | 12 |
| 5075_i_at | YGL076C | RPL7A | 11.21275 | 10.95831 | 11.09925 | 10.23077 | 10.11776 | 10.13871 | 9.221504 | 9.129208 | 9.228098 | 7.450222 | 7.936609 | 8.281642 | 6.476956 | 6.476787 | 7.103796 | 8.576665 | -1.2    | 0.0949   | 2.69E-09 | 1.79E-08 | 24.33073 | 20 |
| 5076_f_at | YGL076C | RPL7A | 9.448215 | 9.572678 | 9.911187 | 8.053302 | 8.222398 | 8.872346 | 7.407384 | 7.732345 | 7.660545 | 5.830585 | 5.970751 | 6.395118 | 4.215285 | 4.468807 | 4.883879 | 6.792366 | -1.38   | 0.086    | 3.33E-10 | 6.44E-09 | 38.65192 | 12 |
| 5077_at   | YGL075C | PPS1  | 5.407794 | 5.075252 | 3.907769 | 5.004312 | 5.040788 | 4.861111 | 4.914195 | 5.598863 | 5.339767 | 5.400306 | 5.357441 | 5.073426 | 5.562438 | 5.238763 | 5.381866 | 5.259508 | 0.157   | -0.0467  | 0.141    | 0.016357 | 1.515386 | 13 |
| 5078_at   | YGL074C |       | 3.478926 | 3.462721 | 2.981844 | 3.327984 | 3.222156 | 3.324754 | 3.110171 | 3.413371 | 3.737109 | 3.238424 | 3.367249 | 3.919567 | 3.15135  | 3.272065 | 5.798677 | 3.315998 | 0.17    | 0.105    | 0.268    | 0.029075 | 1.714048 | 8  |
| 5079_at   | YGL073W | HSF1  | 7.05041  | 7.19202  | 7.389879 | 7.174275 | 7.095177 | 7.367907 | 7.651242 | 7.584574 | 7.645396 | 8.096202 | 8.083299 | 9.379720 | 9.0184   | 8.676769 | 9.082603 | 7.77306  | 0.468   | 0.0764   | 4.67E-08 | 1.04E-07 | 3.458858 | 7  |
| 5080_at   | YGL072C |       | 5.705242 | 5.836733 | 5.431858 | 5.286014 | 5.414924 | 5.30158  | 5.631758 | 5.508601 | 5.546011 | 5.65636  | 5.715132 | 5.412021 | 5.898957 | 6.398588 | 6.210601 | 5.59206  | 0.13    | 0.097    | 0.00161  | 0.000319 | 1.563721 | 13 |
| 5081_at   | YGL071W | AFT1  | 5.164809 | 5.157292 | 4.021944 | 5.645235 | 5.508515 | 5.195247 | 5.967725 | 6.062185 | 6.01402  | 6.283866 | 5.91488  | 6.256244 | 5.817126 | 5.765274 | 6.265216 | 6.088372 | 0.311   | -0.201   | 0.000529 | 0.000124 | 2.689547 | 9  |
| 5082_at   | YGL070C | RPB9  | 8.256924 | 7.998914 | 7.855055 | 7.480366 | 7.749769 | 7.522894 | 7.55017  | 7.664171 | 7.481491 | 7.273428 | 7.198624 | 6.89044  | 4.836282 | 6.301964 | 6.496698 | 7.282197 | -0.416  | -0.015   | 3.47E-08 | 8.58E-08 | 3.009628 | 16 |
| 5083_at   | YGL069C |       | 5.041922 | 5.141044 | 4.489362 | 4.747964 | 4.804096 | 4.936803 | 4.887025 | 4.886726 | 4.824665 | 4.608176 | 4.919199 | 4.517652 | 4.739565 | 4.999569 | 6.429018 | 4.756145 | -0.0369 | 0.024    | 0.533    | 0.053828 | 1.126453 | 16 |
| 5084_at   | YGL068W | MNP1  | 8.561115 | 8.187261 | 7.952114 | 8.528983 | 8.688725 | 8.967306 | 8.79357  | 8.733407 | 8.577017 | 8.437686 | 8.11994  | 8.182829 | 7.25456  | 7.284658 | 7.062451 | 8.544139 | -0.295  | -0.223   | 1.16E-06 | 9.47E-07 | 2.784104 | 15 |
| 5085_at   | YGL067W | NPY1  | 7.519027 | 7.663572 | 7.39476  | 7.266878 | 7.078123 | 7.418579 | 8.621103 | 7.094816 | 6.872921 | 6.783377 | 6.975198 | 7.010812 | 6.861992 | 6.942802 | 6.772276 | 6.936426 | -0.174  | 0.0717   | 0.000174 | 4.83E-05 | 1.584002 | 16 |
| 5086_at   | YGL066W | SGF73 | 6.780769 | 6.559616 | 6.372509 | 6.479536 | 6.424726 | 6.468329 | 6.540117 | 6.706946 | 6.385486 | 6.817368 | 6.625774 | 6.140095 | 6.301996 | 6.415248 | 6.268364 | 6.503032 | -0.0521 | -0.0165  | 0.337    | 0.035665 | 1.148001 | 13 |
| 5087_at   | YGL065C | ALG2  | 7.283798 | 7.276624 | 7.117823 | 7.051814 | 6.867253 | 6.972274 | 6.56994  | 6.744362 | 6.616186 | 6.431325 | 6.624983 | 6.463385 | 6.488438 | 6.74824  | 6.491144 | 6.588704 | -0.181  | 0.0883   | 1.81E-05 | 7.53E-06 | 1.65636  | 16 |
| 5088_at   | YGL064C | MRH4  | 6.497549 | 6.610881 | 6.216156 | 6.615228 | 6.952625 | 6.641235 | 6.664415 | 6.744023 | 6.530031 | 6.588267 | 6.413563 | 6.063034 | 6.078216 | 6.10987  | 5.457384 | 6.536426 | -0.181  | -0.11    | 0.000969 | 0.000207 | 1.766466 | 15 |
| 5089_at   | YGL063W | PUS2  | 5.619662 | 5.176721 | 4.398235 | 4.836156 | 4.546291 | 4.690785 | 4.492877 | 5.076792 | 4.516347 | 4.789277 | 4.664253 | 4.55729  | 4.719606 | 4.30049  | 4.346653 | 4.625088 | -0.141  | 0.0344   | 0.121    | 0.014295 | 1.451516 | 16 |
| 5090_at   | YGL062W | PPS1  | 8.69913  | 9.058371 | 8.505109 | 8.026294 | 8.647117 | 8.68454  | 8.728978 | 8.780859 | 8.486186 | 8.771765 | 8.762815 | 9.152556 | 9.610946 | 9.543271 | 9.663971 | 8.7876   | 0.221   | 0.108    | 1.39E-05 | 6.12E-06 | 1.903403 | 8  |
| 5091_at   | YGL061C | DUO1  | 5.594586 | 5.953453 | 5.944289 | 5.597166 | 5.60383  | 5.544357 | 5.211444 | 5.514004 | 5.205653 | 5.21061  | 5.121005 | 5.172346 | 4.916632 | 5.01571  | 4.963429 | 5.244443 | -0.232  | 0.045    | 5.52E-06 | 3.01E-06 | 1.850976 | 16 |
| 5092_at   | YGL105W | ARC1  | 5.098966 | 9.690944 | 9.424027 | 8.886257 | 8.867095 | 8.861073 | 8.459719 | 8.585199 | 8.57408  | 7.916817 | 8.023709 | 6.867792 | 6.683729 | 6.364107 | 6.855307 | 8.248203 | -0.741  | -0.045   | 1.92E-10 | 5.24E-09 | 7.125402 | 18 |
| 5093_at   | YGL104C | VPS73 | 6.930827 | 7.170306 | 6.437401 | 7.06741  | 7.070198 | 6.915004 | 7.265634 | 7.157062 | 6.960792 | 6.217093 | 6.382521 | 5.530313 | 5.535664 | 5.686847 | 6.723644 | -0.372   | -0.136  | 1.31E-05 | 5.81E-06 | 2.700955 | 15       |    |
| 5094_at   | YGL103W | RPL28 | 10.92048 | 11.30554 | 11.74235 | 10.73005 | 10.8286  | 11.36601 | 10.37193 | 10.53338 | 10.46526 | 9.841044 | 9.276109 | 9.97118  | 8.717868 | 8.757873 | 9.047924 | 10.1147  | -0.682  | -0.00309 | 6.08E-07 | 5.95E-07 | 6.095859 | 18 |
| 5095_at   | YGL102C |       | 6.705928 | 7.026266 | 6.287403 | 5.497689 | 6.268132 | 6.116286 | 6.338487 | 6.390456 | 6.950031 | 6.081877 | 5.932823 | 5.717872 | 5.480124 | 5.827146 | 5.734577 | 6.05661  | -0.245  | 0.0266   | 0.0207   | 0.002952 | 1.913978 | 16 |
| 5096_at   | YGL101W |       | 7.128461 | 7.018705 | 5.795741 | 6.868866 | 6.553819 | 5.569397 | 6.965416 | 7.069101 | 6.590827 | 8.627368 | 8.261294 | 7.938586 | 6.059317 | 7.664258 | 7.442991 | 7.389137 | 0.418   | -0.0736  | 0.0348   | 0.00469  | 3.028984 | 7  |
| 5097_at   | YGL100W | SEH1  | 7.016589 | 7.287677 | 7.261187 | 6.937001 | 7.231054 | 6.806365 | 6.874917 | 6.936084 | 6.604532 | 7.36076  | 6.696068 | 6.523699 | 7.424948 | 7.119453 | 6.918509 | 6.836887 | -0.011  | 0.0927   | 0.118    | 0.013978 | 1.273678 | 13 |
| 5098_at   | YGL099W | LSG1  | 5.773701 | 6.011102 | 5.643943 | 5.565246 | 5.484209 | 5.401836 | 5.710762 | 5.98333  | 5.182346 | 5.794153 | 5.502577 | 5.561646 | 5.072101 | 5.517612 | 4.963993 | 5.54563  | -0.135  | -0.0177  | 0.0562   | 0.007203 | 1.431215 | 16 |
| 5099_at   | YGL098W | USE1  | 5.183186 | 5.040622 | 4.245251 | 4.417709 | 4.50051  | 4.335158 | 4.950466 | 4.074167 | 4.99491  | 5.644628 | 4.871978 | 4.703635 | 6.915239 | 5.800391 | 6.5693   | 4.915285 | 0.428   | 0.19     | 0.000234 | 6.18E-05 | 3.349341 | 8  |
| 5100_at   | YGL097W | SRM1  | 8.232353 | 8.702412 | 8.551769 | 8.356444 | 8.44753  | 8.255684 | 8.325013 | 8.670149 | 8.045367 | 8.403021 | 8.119336 | 7.666826 | 7.716273 | 7.875247 | 7.438599 | 8.159059 | -0.261  | 0.00592  | 0.000387 | 9.46E-05 | 1.997711 | 16 |
| 5101_at   | YGL096W | TO58  | 8.116098 | 7.987755 | 7.883836 | 8.596934 | 8.63929  | 8.22945  | 8.690439 | 8.882321 | 8.927234 | 8.419279 | 8.481714 | 8.672128 | 9.142234 | 8.468494 | 9.422855 | 8.716348 | 0.225   | -0.0556  | 0.1003   | 0.001588 | 1.817595 | 9  |
| 5102_at   | YGL095C | VPS45 | 5.918739 | 6.191777 | 5.776288 | 6.083544 | 6.157239 | 5.930241 | 6.301177 | 5.960164 | 5.755527 | 5.945821 | 5.439389 | 5.506727 | 5.512918 | 5.323503 | 5.008729 | 5.84317  | -0.224  | -0.0717  | 0.000295 | 7.50E-05 | 1.810108 | 16 |
| 5103_at   | YGL094C | PAN2  | 6.294151 | 6.448181 | 6.142019 | 6.464618 | 6.354361 | 6.317411 | 6.718022 | 6.546987 | 6.435266 | 6.261367 | 6.517679 | 6.0530   |          |          |          |          |         |          |          |          |          |    |

|           |         |       |          |           |          |          |          |          |          |          |          |          |          |          |          |          |          |          |          |           |          |          |          |    |
|-----------|---------|-------|----------|-----------|----------|----------|----------|----------|----------|----------|----------|----------|----------|----------|----------|----------|----------|----------|----------|-----------|----------|----------|----------|----|
| 5135_at   | YGL107C | RMD9  | 7.526858 | 7.678756  | 7.341433 | 7.962911 | 7.795827 | 7.942285 | 7.788072 | 8.229136 | 8.178307 | 7.93903  | 8.034377 | 8.13481  | 7.645271 | 7.87483  | 8.92247  | 8.099571 | 0.147    | -0.0715   | 0.0675   | 0.008496 | 1.505568 | 13 |
| 5136_at   | YGL106W | MLC1  | 9.435107 | 9.152234  | 9.261891 | 8.402165 | 8.708421 | 8.56249  | 8.249165 | 8.561132 | 8.317098 | 8.087584 | 7.81216  | 7.722129 | 7.135715 | 6.764035 | 7.469006 | 8.050617 | -0.557   | 0.0407    | 3.68E-08 | 8.92E-08 | 4.373334 | 18 |
| 5137_at   | YGL153W | PXU1  | 6.872553 | 6.811721  | 6.463573 | 7.040173 | 7.020379 | 6.456122 | 7.080613 | 7.391258 | 6.687853 | 6.889139 | 6.492984 | 6.172579 | 6.216708 | 6.039954 | 5.945549 | 6.779152 | -0.192   | -0.105    | 0.005699 | 0.000694 | 1.78827  | 15 |
| 5138_at   | YGL151W | NET14 | 3.488661 | 3.854227  | 3.317753 | 3.348305 | 3.349413 | 3.215283 | 3.394649 | 3.83572  | 3.299112 | 3.53106  | 3.818213 | 3.57291  | 3.521014 | 3.362978 | 3.560018 | 0.0128   | -0.0178  | 0.903     | 0.086689 | 1.06554  | 13       |    |
| 5139_at   | YGL150C | IN080 | 7.554934 | 7.60585   | 6.772146 | 7.322953 | 7.391722 | 7.270951 | 7.919692 | 7.99058  | 7.506316 | 8.148358 | 7.737111 | 7.715194 | 7.79825  | 7.195892 | 7.525041 | 7.756074 | 0.0796   | -0.101    | 0.125    | 0.014681 | 1.451681 | 13 |
| 5140_at   | YGL149W |       | 4.167177 | 4.1108209 | 3.886741 | 4.058307 | 4.131089 | 4.190085 | 4.835769 | 3.799295 | 4.019755 | 4.300376 | 4.365217 | 4.028628 | 3.884075 | 3.991661 | 3.920637 | -0.0384  | 0.0281   | 0.275     | 0.029711 | 1.385613 | 13       |    |
| 5141_at   | YGL148W | ARO2  | 11.37026 | 11.37176  | 11.34347 | 10.80648 | 10.95011 | 10.61818 | 10.66884 | 10.49627 | 10.43606 | 10.47883 | 10.34878 | 10.1855  | 9.525226 | 9.426332 | 9.613453 | 10.38405 | -0.46    | 0.0143    | 1.13E-08 | 4.18E-08 | 3.38601  | 16 |
| 5142_i_at | YGL147C | RPL9A | 9.13226  | 9.643164  | 10.09383 | 8.626458 | 8.52858  | 8.71001  | 7.753712 | 7.419615 | 6.947091 | 6.187852 | 6.149596 | 7.18408  | 7.264355 | 6.784687 | 7.29992  | 7.028655 | -0.73    | 0.381     | 1.72E-05 | 7.23E-06 | 8.13621  | 19 |
| 5143_at   | YGL146C |       | 4.67214  | 4.424348  | 3.994301 | 4.478858 | 4.666995 | 4.497815 | 5.178429 | 5.292218 | 5.216732 | 4.884582 | 4.951304 | 4.963307 | 4.904681 | 4.180293 | 4.544166 | 5.005141 | 0.053    | -0.156    | 0.0226   | 0.00319  | 1.58796  | 12 |
| 5144_at   | YGL145W | TIP20 | 5.191933 | 5.770794  | 5.361262 | 4.992019 | 5.13155  | 4.813162 | 5.011301 | 4.910258 | 4.573769 | 4.777208 | 4.872639 | 4.880071 | 5.078722 | 4.75989  | 5.105741 | 4.795954 | -0.109   | 0.113     | 0.00333  | 0.000598 | 1.566632 | 14 |
| 5145_at   | YGL144C | ROG1  | 6.59612  | 6.579879  | 6.98531  | 6.702707 | 6.567151 | 7.01583  | 6.812245 | 6.59642  | 6.561416 | 7.100433 | 6.882803 | 7.337219 | 7.59299  | 7.242901 | 7.301259 | 6.89426  | 0.19     | 0.0417    | 0.00165  | 0.000327 | 1.654343 | 13 |
| 5146_at   | YGL143C | MRF1  | 5.898704 | 5.880489  | 5.939744 | 6.42079  | 6.418994 | 6.553814 | 6.383653 | 6.116934 | 6.366245 | 5.829447 | 5.878664 | 5.884199 | 5.118405 | 4.670024 | 4.766535 | 6.177534 | -0.308   | -0.214    | 1.85E-07 | 2.56E-07 | 2.782502 | 15 |
| 5147_at   | YGL142C | GPI10 | 5.638161 | 5.869955  | 4.953946 | 5.955641 | 5.900883 | 6.321036 | 6.607965 | 6.950081 | 6.566306 | 7.131212 | 7.286802 | 7.151963 | 6.109934 | 6.30633  | 6.612164 | 6.899179 | 0.275    | -0.278    | 0.000205 | 5.54E-05 | 3.050504 | 10 |
| 5148_at   | YGL141W | HUL5  | 6.975648 | 6.987738  | 6.679899 | 7.082777 | 7.081387 | 7.111041 | 7.362946 | 7.614468 | 7.350637 | 7.581226 | 7.720356 | 7.420717 | 6.876987 | 7.162855 | 7.759469 | 7.474432 | 0.12     | -0.114    | 0.0113   | 0.001724 | 1.598032 | 13 |
| 5149_at   | YGL140C |       | 5.285602 | 5.307048  | 4.304976 | 5.102116 | 5.08629  | 5.2805   | 5.931188 | 5.83994  | 5.728051 | 5.410049 | 5.640107 | 5.90954  | 5.292129 | 5.417536 | 5.483183 | 5.667518 | 0.123    | -0.138    | 0.0352   | 0.004746 | 1.720403 | 9  |
| 5150_at   | YGL139W | FLC3  | 5.473768 | 5.330666  | 4.061883 | 4.947381 | 5.011718 | 4.82288  | 5.277044 | 5.178099 | 5.29752  | 5.3463   | 5.194368 | 5.421921 | 5.573381 | 5.080865 | 5.445343 | 5.230679 | 0.123    | -0.0228   | 0.257    | 0.028008 | 1.386353 | 13 |
| 5151_at   | YGL138C |       | 2.92954  | 2.755592  | 2.783144 | 2.89604  | 2.79246  | 3.150613 | 2.843807 | 3.033022 | 2.955272 | 2.907052 | 3.036684 | 2.92308  | 2.825671 | 2.896745 | 2.825945 | 2.965522 | 0.00528  | -0.0351   | 0.139    | 0.016117 | 1.097738 | 13 |
| 5152_at   | YGL137W | SEC27 | 5.50937  | 8.484403  | 8.00554  | 7.613994 | 7.717464 | 7.766494 | 7.953103 | 8.149307 | 7.811058 | 7.998103 | 7.926155 | 7.455642 | 6.952337 | 7.509927 | 6.781166 | 7.741441 | -0.287   | -0.0164   | 0.00154  | 0.000308 | 2.139014 | 16 |
| 5153_at   | YGL136C | MRM2  | 5.2629   | 5.216742  | 4.748961 | 5.776924 | 5.575285 | 5.411061 | 5.779294 | 5.941658 | 5.617729 | 5.886075 | 5.870615 | 6.187385 | 4.938663 | 5.092192 | 4.999374 | 5.899307 | 0.00572  | -0.237    | 2.96E-05 | 1.13E-05 | 1.790709 | 12 |
| 5154_at   | YGL134W | PCL10 | 6.271278 | 6.288909  | 5.637638 | 6.518278 | 6.517171 | 6.138472 | 6.846175 | 6.926235 | 6.665441 | 7.384411 | 7.291851 | 7.103145 | 6.495119 | 6.374297 | 6.134182 | 6.985377 | 0.124    | -0.223    | 0.00141  | 0.000285 | 2.900699 | 12 |
| 5155_at   | YGL133W | ITC1  | 5.671015 | 5.825605  | 5.681258 | 5.673998 | 5.687783 | 5.670415 | 5.790587 | 6.052791 | 5.867714 | 5.89827  | 5.806901 | 5.814157 | 6.043728 | 6.129696 | 6.09778  | 5.814151 | 0.0962   | 0.0242    | 0.00112  | 0.00233  | 1.290476 | 13 |
| 5156_at   | YGL132W |       | 3.340106 | 3.38327   | 2.953984 | 3.228087 | 3.244561 | 3.518149 | 3.423724 | 3.383243 | 3.472763 | 3.565542 | 3.38557  | 3.183219 | 3.406358 | 3.907882 | 3.416548 | 3.406673 | 0.0826   | -0.000971 | 0.134    | 0.015635 | 1.244848 | 13 |
| 5157_at   | YGL131C | SGT1  | 5.653988 | 5.532925  | 4.546193 | 5.449663 | 5.422614 | 5.429058 | 6.242779 | 6.211182 | 6.132543 | 6.088862 | 6.030835 | 5.688943 | 6.091573 | 5.90515  | 5.854551 | 5.984883 | 0.186    | -0.111    | 0.0308   | 0.004214 | 1.763552 | 9  |
| 5158_at   | YGL130W | CEN2  | 7.13602  | 7.216996  | 6.91472  | 6.867739 | 6.896624 | 6.791494 | 6.936149 | 7.002985 | 6.700854 | 7.055899 | 6.86947  | 6.838865 | 6.405439 | 6.577065 | 6.305288 | 6.851381 | -0.147   | -0.0284   | 0.00107  | 0.000224 | 1.477843 | 16 |
| 5159_at   | YGL129C | RSW23 | 5.110963 | 5.428655  | 4.553288 | 5.328435 | 5.333887 | 5.017237 | 5.374106 | 5.275645 | 5.297343 | 4.740935 | 4.921976 | 5.184586 | 5.107842 | 4.66804  | 4.587891 | 5.15586  | -0.0885  | -0.0653   | 0.106    | 0.012666 | 1.354354 | 13 |
| 5160_at   | YGL128C | CWC23 | 6.439812 | 6.140206  | 5.444346 | 6.098385 | 6.181363 | 6.109661 | 6.424082 | 6.593826 | 6.236056 | 6.943933 | 7.016216 | 6.450172 | 7.327894 | 7.302898 | 6.840098 | 6.57801  | 0.322    | -0.00251  | 0.00053  | 0.00124  | 2.34895  | 7  |
| 5161_at   | YGL174W | BUD13 | 6.223157 | 6.267261  | 5.850961 | 5.705026 | 5.715576 | 6.006247 | 5.911573 | 6.186477 | 5.967246 | 6.24264  | 5.848487 | 6.249171 | 6.228211 | 6.160003 | 6.266259 | 5.99542  | 0.051    | 0.0421    | 0.18     | 0.020375 | 1.203305 | 13 |
| 5162_at   | YGL173C | KEM1  | 7.886241 | 8.206485  | 7.682808 | 7.732594 | 7.673599 | 7.813125 | 7.765959 | 7.977656 | 7.920552 | 8.16616  | 8.418522 | 8.659771 | 8.893143 | 8.471419 | 9.096743 | 8.091823 | 0.271    | 0.0721    | 0.000273 | 7.03E-05 | 2.052659 | 8  |
| 5163_at   | YGL172W | NUP49 | 8.528783 | 8.504462  | 8.629427 | 8.198526 | 8.165176 | 8.33758  | 7.910729 | 7.901172 | 7.874973 | 8.239324 | 8.80256  | 7.976974 | 8.492047 | 8.248012 | 8.377981 | 7.917816 | -0.0455  | 0.136     | 0.000239 | 6.29E-05 | 1.4956   | 13 |
| 5164_at   | YGL171W | ROK1  | 7.233102 | 7.486158  | 6.57417  | 6.593884 | 6.655449 | 6.299051 | 6.943793 | 6.782628 | 6.134045 | 6.555171 | 6.099974 | 5.449147 | 5.261534 | 5.929675 | 5.092648 | 6.174044 | -0.484   | -0.00989  | 4.81E-05 | 1.67E-05 | 3.607427 | 18 |
| 5165_at   | YGL170C | SPO74 | 2.964247 | 2.881171  | 2.521517 | 2.905513 | 2.987688 | 3.047397 | 2.584952 | 2.897277 | 3.046911 | 2.778977 | 3.019694 | 2.79429  | 2.816374 | 2.949873 | 2.680371 | 2.906601 | -0.00287 | -0.0247   | 0.672    | 0.066463 | 1.06476  | 13 |
| 5166_at   | YGL169W | SUA5  | 4.35834  | 4.476419  | 4.090369 | 3.93845  | 4.188777 | 4.260366 | 4.203952 | 4.383882 | 4.144959 | 4.068872 | 3.95665  | 3.833144 | 3.599095 | 3.639473 | 3.390549 | 4.057204 | -0.198   | -0.0374   | 6.15E-05 | 2.04E-05 | 1.691247 | 16 |
| 5167_at   | YGL168W | HUR1  | 3.530116 | 3.752324  | 3.16996  | 3.383458 | 3.433556 | 3.3016   | 3.315383 | 3.43425  | 3.300986 | 3.138451 | 3.465936 | 3.437264 | 4.113702 | 4.29417  | 3.669903 | 3.349466 | 0.129    | 0.113     | 0.00142  | 0.000287 | 1.61883  | 13 |
| 5168_at   | YGL167C | PMR1  | 7.735502 | 7.923488  | 7.013624 | 7.663834 | 7.487304 | 7.143065 | 7.934589 | 7.802675 | 7.611918 | 8.017853 | 8.757592 | 8.570909 | 9.325635 | 8.861337 | 9.322031 | 7.901414 | 0.438    | 0.123     | 2.79E-05 | 1.07E-05 | 3.192223 | 7  |
| 5169_at   | YGL166W | CUP2  | 6.943423 | 6.499395  | 6.918603 | 7.295752 | 7.385051 | 7.289093 | 7.779783 | 8.003004 | 7.909027 | 8.410473 | 8.19802  | 7.98752  | 9.320261 | 8.700278 | 8.987759 | 8.012389 | 0.573    | -0.0343   | 4.93E-07 | 5.07E-07 | 4.563813 | 7  |
| 5170_at   | YGL165C |       | 5.893389 | 5.534018  | 4.605399 | 5.388147 | 5.407456 | 5.211693 | 5.479612 | 5.335667 | 5.455547 | 5.166799 | 5.481089 | 4.77117  | 5.866037 | 5.950106 | 5.606583 | 5.289255 | 0.0895   | 0.0811    | 0.175    | 0.019799 | 1.406769 | 13 |
| 5171_at   | YGL164C | YRB30 | 6.910635 | 6.974583  | 6.704517 | 7.001838 | 6.658922 | 6.49521  | 7.005272 | 7.366448 | 6.683539 | 7.050634 | 6.957048 | 6.736448 | 6.878191 | 7.412367 | 6.664963 | 6.905443 | 0.12     | 0.0483    | 0.164    | 0.018688 | 1.390044 | 13 |
| 5172_at   | YGL163C | RAD54 | 5.422921 | 5.766186  | 5.458237 | 5.534306 | 5.523156 | 5.778084 | 6.258728 | 6.506822 | 6.120998 | 7.204619 | 7.649519 | 7.155362 | 7.614512 | 7.954455 | 7.579468 | 6.586602 | 0.62     | 0.0108    | 1.11E-06 | 9.10E-07 | 5.107158 | 6  |
| 5173_at   | YGL162W | SUT1  | 7.228442 | 6.428076  | 3.744651 | 3.942951 | 3.973223 | 3.760919 | 3.632503 | 4.638794 | 3.578793 | 3.503993 | 3.963982 | 3.590043 | 3.861793 | 3.901696 | 3.649088 | 3.620777 | -0.155   | 0.107     | 0.0505   | 0.006538 | 1.663888 | 14 |
| 5174_at   | YGL161C | YIP5  | 9.446057 | 9.104642  | 8.853907 | 8.89492  | 8.957809 | 8.43824  | 9.08755  | 9.965557 | 8.598471 | 8.685366 | 8.227124 | 7.955639 | 7.426111 | 7.568475 | 6.926505 | 8.525345 | -0.477   | -0.0849   | 9.94E-06 | 4.73E-06 | 3.536709 | 18 |
| 5175_at   | YGL160W |       | 3.998175 | 4.432599  | 3.623684 | 4.901181 | 4.798663 | 4.379317 | 5.256648 | 4.972664 | 5.02994  | 5.041135 | 6.28888  | 6.68583  | 4.925629 | 4        |          |          |          |           |          |          |          |    |



|           |                |          |           |          |          |          |          |          |          |          |          |          |          |          |          |          |          |          |          |          |          |          |    |
|-----------|----------------|----------|-----------|----------|----------|----------|----------|----------|----------|----------|----------|----------|----------|----------|----------|----------|----------|----------|----------|----------|----------|----------|----|
| 5207_at   | YGL218W        | 3.341342 | 3.276972  | 3.010428 | 3.152894 | 3.443375 | 3.278018 | 3.366581 | 3.254426 | 3.215032 | 2.998007 | 3.155787 | 2.964875 | 3.270443 | 2.925272 | 3.079809 | 3.181806 | -0.0515  | -0.00625 | 0.258    | 0.02805  | 1.146367 | 13 |
| 5208_at   | YGL217C        | 4.131239 | 4.204054  | 3.815955 | 4.039234 | 4.304601 | 4.120978 | 4.042009 | 4.309587 | 4.194918 | 4.092926 | 4.419613 | 3.855494 | 4.274386 | 4.085673 | 4.27247  | 4.166713 | 0.0326   | -0.00894 | 0.636    | 0.063224 | 1.09037  | 13 |
| 5209_at   | YGL216W KLP3   | 5.126377 | 5.243369  | 5.122233 | 5.31039  | 5.506651 | 5.336234 | 5.485849 | 5.281134 | 5.291697 | 5.768271 | 5.626943 | 6.003296 | 6.0332   | 6.368672 | 6.440196 | 5.552958 | 0.297    | 0.0523   | 3.65E-06 | 2.22E-06 | 2.197552 | 7  |
| 5210_at   | YGL215W CLG1   | 7.296997 | 7.274924  | 6.134086 | 7.22453  | 7.066449 | 6.431387 | 6.486485 | 7.882386 | 7.538307 | 6.848558 | 7.649215 | 6.606292 | 7.876402 | 7.661087 | 8.038680 | 8.000990 | 0.304    | -0.181   | 0.0242   | 0.003391 | 2.527792 | 9  |
| 5211_at   | YGL214W        | 4.245143 | 4.616658  | 4.292369 | 3.936107 | 4.316067 | 4.243755 | 4.191248 | 4.159996 | 4.134503 | 4.051086 | 4.044246 | 3.95301  | 4.127343 | 3.926947 | 4.051747 | 4.063221 | -0.0927  | 0.04     | 0.00667  | 0.001096 | 1.278664 | 13 |
| 5212_at   | YGL213C SKI8   | 6.723664 | 7.147874  | 7.079941 | 6.956602 | 6.874925 | 6.288775 | 6.660678 | 6.504    | 6.675802 | 6.310324 | 6.528804 | 6.85247  | 7.278959 | 5.727807 | 6.207868 | 6.621119 | -0.283   | -0.0491  | 0.000065 | 2.14E-05 | 2.115891 | 16 |
| 5213_at   | YGL212W VAM7   | 5.77835  | 5.814057  | 6.255569 | 5.864108 | 5.810434 | 5.737447 | 5.77987  | 5.822733 | 5.566681 | 5.796313 | 5.507785 | 4.906905 | 5.937829 | 4.904902 | 5.457155 | 5.566066 | -0.154   | 0.0364   | 0.0837   | 0.010276 | 1.502575 | 16 |
| 5214_at   | YGL211W NCS6   | 7.284101 | 6.982697  | 6.253281 | 6.65677  | 6.590515 | 6.530984 | 7.333139 | 7.07002  | 6.902223 | 7.359563 | 7.020922 | 6.343895 | 7.100769 | 6.190347 | 6.786853 | 6.893243 | -0.0186  | -0.0406  | 0.802    | 0.077925 | 1.133634 | 13 |
| 5215_at   | YGL210W YPT32  | 6.576151 | 6.831562  | 7.123914 | 6.803744 | 6.731205 | 6.42119  | 6.234797 | 6.315964 | 6.215808 | 6.161639 | 6.316257 | 5.865385 | 6.633465 | 6.628748 | 6.105798 | 6.22962  | -0.125   | 0.12     | 0.00934  | 0.001462 | 1.633418 | 14 |
| 5216_at   | YGL209W MIG2   | 5.952326 | 6.897865  | 6.153141 | 8.580901 | 9.095532 | 8.297435 | 8.574666 | 5.98302  | 9.268675 | 8.31398  | 8.307473 | 7.307885 | 7.578017 | 7.33605  | 6.970007 | 8.476225 | -0.455   | -0.103   | 0.00324  | 0.000584 | 3.343957 | 17 |
| 5217_at   | YGL208W SIP2   | 5.744744 | 5.683846  | 5.515541 | 6.648601 | 6.544643 | 6.485282 | 6.7686   | 7.202038 | 7.080483 | 6.73001  | 7.052972 | 6.495025 | 6.378069 | 6.180797 | 6.207063 | 6.947669 | 0.133    | -0.272   | 2.75E-05 | 1.06E-05 | 2.390386 | 12 |
| 5218_at   | YGL207W SPT16  | 6.894333 | 7.228822  | 6.721626 | 6.250796 | 6.67324  | 6.526697 | 6.631757 | 6.531813 | 6.369339 | 6.525158 | 6.223717 | 6.298032 | 6.343471 | 5.830171 | 6.018357 | 6.358802 | -0.215   | 0.0377   | 0.000694 | 0.000155 | 1.769569 | 16 |
| 5219_at   | YGL206C CHC1   | 8.391314 | 8.137712  | 6.380688 | 7.960618 | 8.029798 | 7.758971 | 8.026117 | 8.218807 | 8.078802 | 7.458808 | 7.507495 | 7.890365 | 6.565579 | 6.307546 | 6.45326  | 7.867607 | -0.32    | -0.227   | 0.00185  | 0.00036  | 2.934169 | 15 |
| 5220_at   | YGL205W POX1   | 3.934066 | 4.175135  | 3.318317 | 5.103256 | 4.806469 | 4.703808 | 5.271834 | 5.712557 | 5.521862 | 5.568771 | 5.357879 | 5.588945 | 5.644627 | 5.361808 | 5.855341 | 5.604448 | 0.459    | 0.244    | 7.61E-06 | 3.86E-06 | 3.77795  | 10 |
| 5221_at   | YGL204C        | 4.373384 | 4.157412  | 3.92107  | 4.057976 | 3.897912 | 4.302029 | 3.700205 | 4.060009 | 4.123694 | 3.993383 | 4.269734 | 4.067789 | 3.910998 | 4.101004 | 4.125277 | 4.039487 | -0.0177  | -0.158   | 0.795    | 0.077388 | 1.069108 | 13 |
| 5222_at   | YGL203C KEX1   | 4.405751 | 4.871483  | 5.083972 | 4.649876 | 4.521964 | 5.086303 | 4.894984 | 4.864153 | 4.888506 | 4.555715 | 5.042278 | 5.496008 | 5.561593 | 5.614207 | 6.555162 | 5.0729   | 0.244    | 0.0308   | 0.000787 | 0.000173 | 1.908867 | 8  |
| 5223_at   | YGL202W ARO8   | 3.73807  | 10.53019  | 10.19789 | 9.620985 | 9.553839 | 9.705726 | 9.23845  | 8.626452 | 9.839666 | 8.859085 | 9.352621 | 9.292931 | 7.712597 | 7.936442 | 8.161092 | 9.253988 | -0.61    | -0.0286  | 9.3E-07  | 0.900778 | 5.043217 | 18 |
| 5224_at   | YGL201C MCM6   | 3.73807  | 3.825844  | 3.429439 | 3.531362 | 3.626812 | 3.408631 | 3.588399 | 3.592984 | 3.50757  | 3.779029 | 3.763806 | 3.614789 | 3.653771 | 3.662285 | 3.445898 | 3.605898 | -0.00018 | 0.00252  | 0.994    | 0.094506 | 1.006405 | 13 |
| 5225_at   | YGL200C EMP24  | 10.57185 | 10.36509  | 10.45837 | 10.20524 | 10.24028 | 10.47578 | 10.11132 | 10.14578 | 10.04416 | 9.962757 | 9.827051 | 9.804108 | 9.865278 | 9.905544 | 9.814226 | 9.961888 | -0.409   | -0.0777  | 4.94E-09 | 2.46E-08 | 2.945498 | 16 |
| 5226_at   | YGL199C        | 4.909504 | 4.886204  | 4.804459 | 5.031755 | 4.879072 | 5.126896 | 4.690564 | 5.004526 | 4.88769  | 4.669905 | 4.784717 | 4.493778 | 4.53873  | 4.806119 | 4.686474 | 4.870071 | -0.0752  | -0.00582 | 0.0856   | 0.010481 | 1.220738 | 13 |
| 5227_at   | YGL198W YIP4   | 8.978377 | 9.172384  | 9.58344  | 9.299253 | 9.102213 | 9.535864 | 8.680983 | 8.842319 | 8.85968  | 8.120089 | 8.479534 | 8.459829 | 7.640033 | 8.129366 | 8.057647 | 8.697939 | -0.38    | -0.0135  | 0.000074 | 2.39E-05 | 2.738882 | 16 |
| 5228_at   | YGL197W MDS3   | 5.195026 | 5.096244  | 4.509568 | 5.218333 | 5.16076  | 5.059085 | 5.54811  | 5.690094 | 5.492491 | 4.987514 | 5.479212 | 5.746816 | 5.119073 | 5.00336  | 5.071411 | 5.454157 | 0.0375   | -0.127   | 0.0331   | 0.004485 | 1.445659 | 12 |
| 5229_at   | YGL239C        | 4.101896 | 3.928808  | 3.477295 | 4.003754 | 3.753681 | 4.00514  | 3.469334 | 3.756226 | 4.052441 | 3.497816 | 3.78066  | 3.447618 | 3.622075 | 3.753482 | 3.592564 | 3.712021 | -0.0701  | 0.0128   | 0.323    | 0.034288 | 1.204176 | 13 |
| 5230_at   | YGL238W CSE1   | 7.260563 | 7.790087  | 7.436858 | 7.05996  | 7.112699 | 7.215249 | 7.189342 | 6.97497  | 7.116815 | 6.708793 | 6.95348  | 6.372785 | 5.929809 | 5.85084  | 6.590261 | 6.984206 | -0.33    | -0.0512  | 0.000124 | 3.63E-05 | 2.240085 | 16 |
| 5231_at   | YGL237C HAP2   | 5.378588 | 5.291749  | 5.09142  | 5.513523 | 5.361416 | 5.625729 | 5.642729 | 5.894906 | 5.532668 | 5.924892 | 5.970669 | 6.256137 | 5.597345 | 5.718395 | 5.979649 | 5.832208 | 0.156    | -0.0913  | 0.00145  | 0.000292 | 1.602043 | 10 |
| 5232_at   | YGL236C MTO1   | 6.056264 | 6.194843  | 6.028335 | 6.412689 | 6.658657 | 6.67457  | 6.569591 | 6.778979 | 6.517834 | 6.399568 | 6.063221 | 6.002077 | 6.197346 | 5.785059 | 5.981229 | 6.47206  | -0.071   | -0.113   | 0.0129   | 0.001939 | 1.466622 | 12 |
| 5233_at   | YGL235W        | 4.805804 | 4.472061  | 4.282687 | 4.623935 | 4.20841  | 4.847815 | 4.802489 | 4.545193 | 4.475929 | 4.443038 | 4.430181 | 4.262816 | 4.388649 | 4.546855 | 4.513569 | 4.40292  | -0.0192  | 0.0294   | 0.69     | 0.068011 | 1.107434 | 13 |
| 5234_at   | YGL234W ADE5,7 | 10.21637 | 10.37871  | 9.92351  | 9.241475 | 9.220643 | 9.506271 | 9.097507 | 9.09805  | 9.947722 | 8.925077 | 8.735762 | 8.71424  | 9.004412 | 8.943472 | 9.166034 | 8.829007 | -0.293   | 0.213    | 1.34E-07 | 2.09E-07 | 2.6815   | 14 |
| 5235_at   | YGL233W SEC15  | 5.738691 | 5.900269  | 5.339401 | 5.397572 | 5.25306  | 5.532941 | 5.259851 | 5.504099 | 5.188622 | 4.988377 | 5.186209 | 5.231465 | 5.234715 | 5.275413 | 4.909214 | 5.205874 | -0.136   | 0.0533   | 0.00457  | 0.000791 | 1.43549  | 16 |
| 5236_n_at | YGL232W TAN1   | 3.412552 | 3.974369  | 2.95962  | 3.368035 | 3.005599 | 3.083761 | 3.174826 | 3.255835 | 3.20706  | 3.131068 | 2.832557 | 2.818405 | 2.858695 | 2.679055 | 2.621407 | 3.023533 | -0.19    | 0.0156   | 0.00275  | 0.001179 | 1.656389 | 16 |
| 5237_at   | YGL232W TAN1   | 5.334984 | 5.662327  | 5.578026 | 5.218335 | 5.058394 | 5.205533 | 4.988528 | 4.952335 | 4.739006 | 4.552745 | 4.282575 | 4.05549  | 3.605672 | 3.878923 | 3.845046 | 4.596029 | -0.479   | 0.0182   | 4.33E-08 | 9.97E-08 | 3.559369 | 18 |
| 5238_at   | YGL231C        | 8.743422 | 8.923044  | 9.320318 | 8.965059 | 8.939088 | 8.679393 | 8.651238 | 8.697245 | 8.634017 | 8.458353 | 8.080858 | 8.154922 | 7.76097  | 7.6254   | 7.543302 | 8.460393 | -0.369   | -0.0361  | 7.7E-07  | 6.93E-07 | 2.659636 | 16 |
| 5239_at   | YGL230C        | 3.328224 | 3.462587  | 2.985532 | 3.451288 | 3.333399 | 3.509793 | 3.234731 | 3.379568 | 3.253351 | 3.373531 | 3.276198 | 3.208525 | 4.847427 | 3.744958 | 4.192575 | 3.351952 | 0.227    | 0.117    | 0.00151  | 0.000303 | 1.958805 | 8  |
| 5240_at   | YGL229C SAP4   | 5.595465 | 5.605099  | 5.301616 | 5.774083 | 5.638578 | 5.809473 | 5.812195 | 5.613746 | 5.660737 | 5.942956 | 5.873305 | 5.616069 | 6.980035 | 6.249832 | 7.104637 | 5.951822 | 0.332    | 0.0527   | 0.00102  | 3.10E-05 | 2.041028 | 7  |
| 5241_at   | YGL228W SHE10  | 7.676407 | 7.730645  | 7.257017 | 7.793112 | 7.6656   | 7.562099 | 8.357994 | 8.296008 | 8.158646 | 8.973076 | 8.781382 | 8.571449 | 9.512026 | 9.050266 | 8.775981 | 8.438656 | 0.448    | -0.0363  | 2.19E-05 | 8.82E-06 | 3.282011 | 7  |
| 5242_at   | YGL227W VID30  | 4.510825 | 4.628199  | 3.607566 | 4.930426 | 4.872281 | 4.520907 | 5.370652 | 5.531325 | 4.958053 | 4.870707 | 5.233333 | 5.518631 | 5.431508 | 5.374234 | 5.206781 | 5.249472 | 0.273    | -0.126   | 0.00316  | 0.00057  | 2.104324 | 9  |
| 5243_at   | YGL226C-OST5   | 8.325756 | 8.871706  | 9.190464 | 8.828986 | 8.616306 | 9.2215   | 8.611391 | 8.552016 | 8.454786 | 8.049011 | 8.48973  | 8.778479 | 7.618856 | 7.958968 | 8.727768 | 8.547584 | -0.263   | -0.063   | 0.00166  | 0.000328 | 2.009133 | 16 |
| 5244_at   | YGL226W        | 6.540427 | 6.618472  | 6.478863 | 7.012798 | 6.96     | 7.129337 | 7.158904 | 7.276429 | 6.932349 | 7.144518 | 7.021647 | 7.105951 | 7.094848 | 6.923921 | 6.548696 | 7.15917  | 0.0682   | -0.124   | 0.000769 | 0.00017  | 1.506283 | 10 |
| 5245_at   | YGL225W VRG4   | 10.54414 | 10.507191 | 10.16403 | 10.39574 | 10.23723 | 10.15044 | 10.00321 | 9.878746 | 9.761906 | 9.559715 | 9.870557 | 9.825454 | 8.687223 | 8.981989 | 8.609883 | 9.839355 | -0.421   | -0.0687  | 3.43E-07 | 3.92E-07 | 3.055194 | 16 |
| 5246_at   | YGL224C SDT1   | 7.870034 | 8.222     | 8.721902 | 7.49498  | 7.35418  | 7.676136 | 7.811464 | 7.62252  | 7.713424 | 7.420297 | 7.842491 | 8.232743 | 7.287289 | 7.371441 | 7.58121  | 7.620347 | -0.169   | 0.0525   | 0.0717   | 0.008959 | 1.563782 | 16 |
| 5247_at   | YGL223C COG1   | 10.91909 | 7.472746  | 6.647995 | 7.1173   | 7.252008 | 7.060392 | 7.219885 | 7.090941 | 6.784775 | 6.588466 | 6.440368 | 6.617497 | 6.239023 | 6.207867 | 5.935217 | 6.799066 | -0.289   | -0.0414  | 0.000153 | 4.34E-05 | 2.153837 | 16 |
| 5248_at   | YGL222C EDC1   | 4.284962 | 4.350624  | 4.2      |          |          |          |          |          |          |          |          |          |          |          |          |          |          |          |          |          |          |    |

|           |                |          |          |          |          |          |           |          |          |          |          |          |           |           |          |          |          |          |           |          |          |          |    |
|-----------|----------------|----------|----------|----------|----------|----------|-----------|----------|----------|----------|----------|----------|-----------|-----------|----------|----------|----------|----------|-----------|----------|----------|----------|----|
| 5302_at   | YFR048W RMD8   | 5.033375 | 5.265522 | 4.636807 | 5.402458 | 5.472202 | 5.046123  | 5.72972  | 5.670693 | 5.41877  | 5.875841 | 5.774755 | 5.92788   | 5.155693  | 5.246896 | 5.336112 | 5.713873 | 0.0987   | -0.169    | 0.00093  | 0.0002   | 1.763893 | 12 |
| 5303_at   | YFR049W YMR31  | 7.644202 | 7.978636 | 8.234417 | 9.005736 | 8.906608 | 8.798799  | 8.760547 | 9.033078 | 9.069018 | 8.627773 | 8.86273  | 9.279239  | 7.704061  | 7.739408 | 7.85059  | 9.046311 | -0.0594  | -0.323    | 1.69E-06 | 1.25E-06 | 2.325171 | 12 |
| 5304_at   | YFR050C PRE4   | 9.640982 | 9.586942 | 9.975932 | 9.586069 | 9.699399 | 10.00504  | 9.676767 | 9.832446 | 9.916644 | 10.00306 | 9.921128 | 10.03423  | 9.971256  | 9.531537 | 10.30106 | 9.887724 | 0.0656   | -0.0161   | 0.328    | 0.034786 | 1.189992 | 13 |
| 5305_at   | YFR051C RET2   | 8.490347 | 8.66906  | 8.917845 | 8.059611 | 8.854501 | 8.427813  | 9.770423 | 8.009529 | 8.059532 | 8.011653 | 7.73894  | 8.367867  | 8.39809   | 7.944882 | 8.16507  | 7.979749 | -0.128   | 0.12      | 0.00274  | 0.000505 | 1.641367 | 14 |
| 5306_at   | YFR052W RPN12  | 7.789052 | 7.986517 | 7.853396 | 7.890091 | 7.879276 | 8.101598  | 7.937658 | 8.203411 | 8.244388 | 7.948236 | 8.229267 | 8.460433  | 7.439082  | 7.718686 | 7.623542 | 8.141037 | -0.0506  | -0.115    | 0.00365  | 0.000648 | 1.419728 | 12 |
| 5307_at   | YFR053C HXK1   | 9.885636 | 9.677266 | 9.295273 | 10.54214 | 10.45841 | 10.057408 | 10.3338  | 10.57617 | 10.67433 | 9.864943 | 10.0744  | 10.51437  | 10.46186  | 10.55489 | 10.84133 | 10.49048 | 0.189    | -0.0928   | 0.0343   | 0.004638 | 1.696511 | 9  |
| 5308_at   | YFR054C        | 4.388069 | 4.270065 | 3.767409 | 4.336525 | 4.202615 | 4.394532  | 4.306891 | 4.498618 | 4.343293 | 4.284694 | 4.567397 | 4.219261  | 4.171296  | 4.095322 | 4.088402 | 4.379584 | -0.00637 | -0.0685   | 0.0741   | 0.009212 | 1.188041 | 13 |
| 5309_at   | YFR056C        | 3.008283 | 2.879921 | 2.651593 | 2.824788 | 2.757679 | 3.030238  | 2.936783 | 3.135427 | 2.967269 | 2.951361 | 2.963275 | 2.678197  | 2.771146  | 2.759372 | 2.822023 | 2.923726 | -0.0202  | -0.0302   | 0.302    | 0.032311 | 1.110031 | 13 |
| 5310_at   | YFR055W IRC7   | 8.159026 | 7.169839 | 6.18602  | 7.257472 | 7.522663 | 6.90322   | 7.088001 | 7.257751 | 7.284776 | 6.630062 | 6.711367 | 6.492572  | 7.047288  | 6.763601 | 6.681969 | 6.972545 | -0.176   | -0.00426  | 0.246    | 0.026863 | 1.593245 | 16 |
| 5311_at   | YFR057W        | 3.256671 | 3.382343 | 3.208539 | 3.289452 | 3.177048 | 3.408341  | 3.047704 | 3.020193 | 3.17545  | 2.798185 | 3.151085 | 3.017088  | 3.191324  | 3.516646 | 3.140945 | 3.07736  | -0.0207  | 0.0598    | 0.106    | 0.012662 | 1.194653 | 13 |
| 5314_at   | YFL021c-a      | 6.628802 | 5.938653 | 6.365961 | 6.272783 | 6.205934 | 6.43155   | 6.147593 | 6.242321 | 6.346389 | 6.40611  | 6.56818  | 6.133057  | 7.894172  | 7.797116 | 7.864905 | 6.362721 | 0.371    | 0.2       | 9.21E-07 | 7.97E-07 | 3.061336 | 8  |
| 5315_at   | YFL013W-A      | 4.744102 | 4.751338 | 4.312188 | 4.464739 | 4.599593 | 4.600878  | 4.613708 | 4.660942 | 4.505414 | 4.690421 | 4.55048  | 4.113706  | 4.439654  | 4.436409 | 4.389893 | 4.513858 | -0.0526  | -0.000263 | 0.332    | 0.035175 | 1.149611 | 13 |
| 5316_at   | YFR036w-a      | 5.972751 | 6.428819 | 3.941966 | 4.530585 | 4.921058 | 4.766796  | 5.206662 | 5.185083 | 4.793221 | 4.952396 | 4.983822 | 4.135951  | 4.793184  | 4.677466 | 4.426136 | 4.73599  | -0.197   | 0.0782    | 0.265    | 0.002871 | 1.684314 | 16 |
| 5317_s_at | YFL042C        | 5.10221  | 5.055425 | 3.829399 | 4.833224 | 4.907074 | 4.910123  | 5.86482  | 5.682981 | 5.33265  | 5.586211 | 5.329263 | 5.698338  | 4.420328  | 4.451333 | 4.714945 | 5.48333  | 0.000517 | -0.251    | 0.00096  | 0.001411 | 1.837706 | 12 |
| 5318_s_at | YFL031W HAC1   | 8.442302 | 7.718997 | 5.813259 | 7.809637 | 7.208606 | 8.001288  | 8.342586 | 9.114238 | 8.627734 | 8.280215 | 9.372587 | 8.881285  | 10.57353  | 9.534513 | 10.21324 | 8.682327 | 0.728    | 0.00326   | 0.00121  | 0.000251 | 6.882647 | 6  |
| 5322_at   | YFR025C HIS2   | 7.035352 | 6.950729 | 7.041209 | 7.329449 | 7.315051 | 7.325054  | 7.51867  | 7.279719 | 7.445241 | 7.702914 | 7.471467 | 7.787779  | 6.709024  | 7.017383 | 7.086069 | 7.543607 | 0.00501  | -0.159    | 0.000127 | 3.70E-05 | 1.479528 | 12 |
| 5323_at   | YFR026C        | 4.684887 | 4.68758  | 4.244763 | 4.432524 | 4.521918 | 4.721834  | 4.52038  | 4.671146 | 4.598844 | 4.598844 | 4.658416 | 4.290312  | 4.364889  | 4.352707 | 4.292763 | 4.555768 | -0.0575  | -0.0333   | 0.0987   | 0.011903 | 1.945213 | 13 |
| 5324_at   | YFR027W ECO1   | 5.67338  | 5.539273 | 5.089904 | 5.546317 | 5.529415 | 5.192593  | 5.633778 | 6.118508 | 5.308882 | 6.593915 | 6.177155 | 5.700461  | 5.951264  | 5.980757 | 5.168219 | 5.854558 | 0.121    | -0.0856   | 0.2      | 0.022326 | 1.494279 | 13 |
| 5325_at   | YFR028C CDC14  | 5.684842 | 6.231698 | 5.951379 | 5.685262 | 5.520932 | 5.709556  | 5.296151 | 5.483112 | 5.313376 | 5.601423 | 5.470745 | 5.164343  | 5.082339  | 5.113596 | 4.954213 | 5.376131 | -0.222   | 0.0344    | 0.000294 | 7.49E-05 | 1.799196 | 16 |
| 5326_at   | YFR029W PTR3   | 4.809264 | 4.364382 | 4.230787 | 5.040142 | 5.012523 | 4.91492   | 5.654412 | 5.391475 | 5.035829 | 5.946502 | 5.504201 | 5.791184  | 5.333689  | 6.012435 | 5.780515 | 5.557921 | 0.342    | -0.132    | 5.74E-05 | 1.94E-05 | 2.476878 | 9  |
| 5327_at   | YFR030W MET10  | 8.251821 | 8.396503 | 7.923556 | 8.234842 | 8.070437 | 9.027984  | 8.448615 | 8.823284 | 8.601037 | 8.242597 | 8.172431 | 8.326306  | 9.379855  | 9.65526  | 9.574083 | 8.485057 | 0.306    | 0.116     | 0.000531 | 0.00124  | 2.286281 | 8  |
| 5328_at   | YFR031C SMC2   | 6.669292 | 6.648764 | 6.672289 | 6.725683 | 6.804636 | 6.690363  | 6.786726 | 6.766304 | 6.139605 | 6.822311 | 6.498357 | 6.534575  | 7.979763  | 7.721592 | 7.066726 | 6.646409 | 0.213    | 0.136     | 0.0011   | 0.000231 | 1.978976 | 8  |
| 5329_s_at | YFR031C-RPL2A  | 13.09114 | 13.09482 | 13.09044 | 12.84146 | 12.95199 | 13.03127  | 12.73739 | 12.75141 | 12.54046 | 11.8929  | 11.93017 | 12.02998  | 11.67703  | 11.48633 | 11.45667 | 12.33922 | -0.449   | -0.000768 | 1.94E-07 | 2.64E-07 | 3.289392 | 16 |
| 5330_at   | YFR032C        | 5.734743 | 5.565345 | 5.292854 | 5.274632 | 5.531764 | 5.825511  | 5.762666 | 5.693222 | 5.556155 | 5.985017 | 5.607432 | 5.333737  | 8.238657  | 7.512793 | 7.021074 | 5.67727  | 0.493    | 0.246     | 1.36E-05 | 6.00E-06 | 4.249615 | 8  |
| 5331_at   | YFR032C-RPL29  | 10.82858 | 11.15985 | 11.85074 | 10.9614  | 11.0144  | 11.57873  | 10.43168 | 10.27277 | 10.52348 | 9.708804 | 9.430785 | 10.26745  | 9.040393  | 9.359605 | 9.564162 | 10.22226 | -0.563   | 0.0313    | 8.37E-05 | 2.63E-05 | 4.449283 | 18 |
| 5332_at   | YFR033C QCR6   | 9.327255 | 9.060846 | 9.044539 | 10.97963 | 11.01089 | 10.11305  | 11.28708 | 11.21661 | 10.93561 | 11.80086 | 11.2121  | 11.23384  | 11.614123 | 11.20422 | 11.15041 | 11.42589 | 0.544    | -0.323    | 1.23E-06 | 9.84E-07 | 5.241729 | 10 |
| 5333_at   | YFR034C PHO4   | 6.981969 | 6.447311 | 6.03192  | 7.121053 | 6.314195 | 6.263784  | 6.127874 | 7.540295 | 6.961211 | 6.861238 | 7.667704 | 6.493964  | 0.058203  | 6.705754 | 7.05056  | 6.906555 | 0.215    | -0.0103   | 0.197    | 0.020708 | 1.767131 | 9  |
| 5334_at   | YFR035C        | 4.359212 | 4.4693   | 4.107828 | 4.274772 | 4.547231 | 4.137102  | 4.404537 | 4.402079 | 4.192536 | 4.278538 | 4.403253 | 4.327695  | 4.521863  | 4.531869 | 4.388897 | 4.355333 | 0.0268   | 0.00864   | 0.546    | 0.050535 | 1.07352  | 13 |
| 5335_at   | YFR036W CDC26  | 6.192165 | 6.358799 | 6.315503 | 6.885707 | 6.753252 | 6.872367  | 6.858432 | 6.793083 | 6.573926 | 7.09272  | 7.152043 | 7.165223  | 7.172871  | 7.386081 | 7.407256 | 7.032629 | 0.266    | -0.0577   | 4.29E-07 | 4.60E-07 | 2.025192 | 12 |
| 5336_at   | YFR037C RSC8   | 6.783142 | 7.211556 | 6.640589 | 6.10176  | 6.355288 | 6.406564  | 6.122392 | 6.311635 | 5.345172 | 6.130023 | 5.420682 | 5.252591  | 5.729309  | 5.316845 | 5.34202  | 5.738461 | -0.378   | 0.12      | 0.000313 | 7.89E-05 | 2.721577 | 14 |
| 5337_at   | YFR038W IRC5   | 5.33879  | 5.336135 | 4.319935 | 4.740831 | 4.793815 | 4.277837  | 5.075246 | 5.170209 | 4.720591 | 4.77282  | 4.636202 | 4.4390715 | 4.201822  | 4.268332 | 4.054001 | 4.68318  | -0.201   | -0.0312   | 0.0282   | 0.003892 | 1.705933 | 16 |
| 5338_at   | YFR039C        | 5.264813 | 5.332323 | 5.519878 | 5.084969 | 5.121364 | 4.994224  | 4.728313 | 4.802675 | 4.337061 | 4.460141 | 4.67138  | 4.837567  | 4.861976  | 5.066821 | 4.825143 | 4.681358 | -0.123   | 0.13      | 0.00137  | 0.000279 | 1.669311 | 14 |
| 5339_at   | YFR040W SAP155 | 6.067699 | 5.965665 | 5.585124 | 6.038934 | 5.959517 | 5.513497  | 6.424951 | 6.314638 | 6.273398 | 7.508858 | 7.192958 | 8.182463  | 8.467211  | 8.220906 | 7.915659 | 6.887353 | 0.92     | 0.159     | 1.91E-06 | 1.37E-06 | 1.144898 | 6  |
| 5340_at   | YFR041C ERJ5   | 3.816201 | 4.465313 | 4.03355  | 3.761384 | 4.02936  | 3.752444  | 3.336807 | 3.449162 | 3.455089 | 3.34334  | 3.457878 | 3.416283  | 3.468914  | 3.304743 | 3.254633 | 3.43149  | -0.217   | 0.0912    | 0.000946 | 0.002003 | 1.778719 | 16 |
| 5341_at   | YFR042W KEG1   | 5.687671 | 5.723654 | 6.115695 | 5.320786 | 5.55669  | 5.044667  | 5.053378 | 5.47486  | 4.681286 | 5.450497 | 4.560818 | 4.677192  | 4.568718  | 4.447765 | 4.627707 | 4.692034 | -0.346   | 0.141     | 9.52E-06 | 4.58E-06 | 2.501912 | 14 |
| 5342_at   | YFR043C IRC6   | 3.858692 | 4.233437 | 4.305008 | 4.112998 | 4.23997  | 4.222818  | 3.740485 | 3.678398 | 3.659772 | 3.526046 | 3.697095 | 3.56742   | 3.829278  | 3.214889 | 3.338622 | 3.725225 | -0.265   | -0.014    | 9.34E-05 | 2.89E-05 | 2.017434 | 16 |
| 5343_at   | YFR044C DUG1   | 9.277135 | 9.33135  | 9.353685 | 9.267959 | 9.061904 | 9.213242  | 9.312955 | 8.941926 | 9.139273 | 8.021097 | 8.390669 | 8.996615  | 7.794119  | 7.861292 | 8.215502 | 7.999591 | -0.384   | -0.0415   | 1.31E-05 | 1.18E-05 | 2.765473 | 16 |
| 5344_at   | YFR002W NIC96  | 5.780273 | 5.960116 | 5.227196 | 5.691457 | 5.751494 | 5.353204  | 5.780387 | 5.577434 | 5.145227 | 5.103122 | 4.606224 | 4.924078  | 5.13004   | 4.70643  | 4.820292 | 5.216984 | -0.244   | 0.0194    | 0.00689  | 0.001128 | 1.907699 | 16 |
| 5345_at   | YFR003C YP11   | 7.451293 | 7.599081 | 7.591724 | 8.000405 | 8.005385 | 7.767146  | 8.355521 | 8.299142 | 8.077333 | 8.283366 | 8.189375 | 8.780065  | 8.396298  | 8.023071 | 7.739015 | 8.189344 | -0.121   | -0.107    | 0.00543  | 0.000914 | 1.573747 | 14 |
| 5346_at   | YFR004W RPN11  | 9.36438  | 9.405398 | 9.603905 | 9.303361 | 9.394455 | 9.169952  | 9.318193 | 9.404324 | 9.152628 | 9.968138 | 9.418593 | 9.469747  | 10.65132  | 9.884789 | 10.07038 | 9.435189 | 0.21     | 0.106     | 0.000425 | 0.001013 | 1.856616 | 16 |
| 5347_at   | YFR005C SAD1   | 4.950994 | 5.122262 | 3.930523 | 4.431446 | 4.661315 | 3.958992  | 5.139501 | 4.371531 | 4.348386 | 4.030427 | 3.655281 | 3.965128  | 3.270663  | 3.186537 | 3.364548 | 4.183278 | -0.375   | -0.0597   | 0.001024 | 0.000255 | 2.701081 | 16 |
| 5348_at   | YFR006W        | 7.7      |          |          |          |          |           |          |          |          |          |          |           |           |          |          |          |          |           |          |          |          |    |

|           |         |        |          |          |          |          |          |          |          |          |          |          |          |          |          |          |          |          |          |          |          |          |          |        |    |
|-----------|---------|--------|----------|----------|----------|----------|----------|----------|----------|----------|----------|----------|----------|----------|----------|----------|----------|----------|----------|----------|----------|----------|----------|--------|----|
| 5380_at   | YFL008W | SMC1   | 6.073831 | 6.403048 | 5.935958 | 6.282997 | 6.169742 | 6.023721 | 6.656615 | 6.671837 | 6.274454 | 7.403145 | 7.282731 | 6.7928   | 6.318938 | 6.387045 | 5.976692 | 6.775317 | 0.104    | -0.173   | 0.0366   | 0.00491  | 1.794842 | 12     |    |
| 5381_at   | YFL007W | BLM10  | 7.633212 | 6.962237 | 4.69335  | 5.9728   | 5.719635 | 5.709576 | 7.220141 | 7.830032 | 7.465855 | 6.885714 | 7.567904 | 6.680442 | 7.449429 | 6.049878 | 6.533894 | 6.930771 | 0.127    | -0.122   | 0.617    | 0.061491 | 1.648797 | 9      |    |
| 5383_at   | YFL005W | SEC4   | 8.674253 | 7.972652 | 7.996612 | 8.145232 | 8.262563 | 8.186925 | 8.540809 | 8.412176 | 8.243593 | 8.406099 | 8.095775 | 7.946143 | 7.508413 | 7.350501 | 7.060093 | 8.232862 | -0.226   | -0.132   | 0.000176 | 4.87E-05 | 2.014811 | 15     |    |
| 5384_at   | YFL004W | WTC2   | 6.579293 | 6.470782 | 5.926502 | 6.516223 | 6.718727 | 6.319386 | 6.994146 | 6.862449 | 6.587984 | 6.692921 | 6.185511 | 6.411231 | 6.079572 | 6.100998 | 5.938444 | 6.669311 | -0.0761  | -0.135   | 0.00361  | 0.000641 | 1.554577 | 12     |    |
| 5385_at   | YFL003C | MSH4   | 4.034116 | 3.962893 | 3.149948 | 4.335023 | 4.540681 | 4.153076 | 4.926779 | 4.729187 | 4.502204 | 4.661344 | 4.628558 | 4.220441 | 4.235337 | 4.360007 | 4.161276 | 4.646031 | 0.12     | -0.181   | 0.00461  | 0.000797 | 1.877762 | 16     |    |
| 5386_at   | YFL002C | SPB4   | 8.632551 | 8.721398 | 8.043938 | 8.288786 | 8.443984 | 8.326713 | 8.402329 | 8.531364 | 8.001386 | 8.264444 | 8.162148 | 7.641809 | 7.455453 | 7.469082 | 7.276341 | 8.154908 | -0.279   | -0.0607  | 0.000173 | 4.81E-05 | 2.097109 | 16     |    |
| 5387_at   | YFL001W | DEG1   | 6.776393 | 6.841371 | 5.892301 | 6.553005 | 6.691514 | 6.120868 | 6.883906 | 7.174551 | 6.550189 | 6.827988 | 6.689498 | 6.462887 | 6.709181 | 6.333776 | 6.13189  | 6.695947 | -0.0203  | -0.0718  | 0.427    | 0.044169 | 1.221205 | 13     |    |
| 5388_at   | YFR001W | LOC1   | 8.183402 | 8.490906 | 8.141793 | 7.741422 | 7.569025 | 6.90493  | 7.272117 | 7.224877 | 6.457894 | 6.892325 | 6.265793 | 5.474165 | 6.661641 | 5.554882 | 5.497927 | 6.525055 | -0.634   | 0.156    | 6.67E-05 | 2.19E-05 | 5.367517 | 18     |    |
| 5389_at   | YFL044C | OTU1   | 6.338648 | 5.911387 | 5.264404 | 6.060382 | 6.052647 | 6.30718  | 6.739312 | 7.285667 | 6.878455 | 6.281273 | 6.398647 | 6.068039 | 5.707801 | 5.366233 | 5.157746 | 6.461838 | -0.116   | -0.233   | 0.00197  | 0.00038  | 2.087105 | 12     |    |
| 5390_at   | YFL041W | FET5   | 7.437954 | 7.267104 | 6.411373 | 7.618449 | 7.72539  | 7.348108 | 8.598021 | 8.406642 | 8.243676 | 8.515977 | 8.2381   | 8.382275 | 8.349119 | 8.577656 | 8.164935 | 8.342937 | 0.353    | -0.181   | 0.000447 | 0.000107 | 2.732289 | 9      |    |
| 5391_at   | YFL040W |        | 4.028208 | 3.882329 | 3.58851  | 4.963316 | 4.663747 | 4.14122  | 4.875442 | 4.947826 | 4.663429 | 4.697372 | 4.352986 | 4.454618 | 4.524388 | 4.55298  | 4.209593 | 4.746635 | 0.114    | -0.165   | 0.00856  | 0.001358 | 1.788951 | 12     |    |
| 5392_at   | YFL039C | ACT1   | 11.92921 | 12.00735 | 12.00177 | 11.911   | 11.81815 | 12.11111 | 12.03546 | 11.98067 | 12.00643 | 11.85296 | 11.96955 | 12.15701 | 12.0349  | 12.04809 | 12.18162 | 11.98862 | 0.0286   | 0.0119   | 0.272    | 0.029422 | 1.082508 | 13     |    |
| 5393_at   | YFL038C | YPT1   | 10.72321 | 10.85277 | 10.89308 | 10.57372 | 10.71423 | 10.6346  | 10.75939 | 10.94644 | 10.68806 | 10.78555 | 10.62662 | 10.61556 | 11.34456 | 10.58934 | 10.74139 | 10.69657 | 0.0387   | 0.0553   | 0.0901   | 0.010965 | 1.214126 | 13     |    |
| 5394_at   | YFL037W | TUB2   | 9.803002 | 9.704734 | 9.142621 | 8.977981 | 8.731293 | 8.75632  | 8.506834 | 8.563588 | 8.322192 | 7.896332 | 8.129693 | 8.111755 | 7.649898 | 7.539039 | 7.464186 | 8.206184 | -0.521   | 0.0951   | 3.1E-08  | 8.03E-08 | 3.978162 | 18     |    |
| 5395_at   | YFL036W | RPO41  | 7.426859 | 7.270337 | 6.701823 | 6.693825 | 6.654446 | 7.823983 | 7.84501  | 7.886841 | 7.771679 | 7.835707 | 7.784167 | 8.394116 | 8.387078 | 8.369709 | 8.473654 | 7.989808 | 0.315    | -0.0575  | 5.48E-05 | 1.87E-05 | 2.30658  | 7      |    |
| 5396_at   | YFL034C | RPL22B | 9.130852 | 9.483199 | 8.997223 | 9.121024 | 9.204099 | 4.979803 | 8.544423 | 8.387055 | 7.940316 | 7.433159 | 7.299858 | 7.177576 | 6.10451  | 6.323307 | 6.158039 | 7.924513 | -0.927   | -0.00863 | 1.68E-07 | 2.44E-07 | 11.67712 | 20     |    |
| 5397_at   | YFL034W |        | 4.065568 | 4.389212 | 3.798526 | 4.42428  | 4.320494 | 4.450365 | 4.446233 | 4.581575 | 4.266809 | 4.658094 | 4.610738 | 4.48545  | 6.300856 | 6.681736 | 6.506512 | 4.569963 | 0.376    | 0.082    | 0.00208  | 7.18E-05 | 2.709468 | 7      |    |
| 5398_at   | YFL033C | RIM15  | 5.704408 | 5.879432 | 4.602337 | 5.763405 | 6.01426  | 5.846512 | 6.209588 | 6.007136 | 5.906929 | 6.903951 | 6.986908 | 6.765137 | 8.16177  | 7.723853 | 7.934278 | 6.503862 | 0.733    | 0.0738   | 1.87E-06 | 1.35E-06 | 6.986852 | 6      |    |
| 5399_at   | YFL032W |        | 3.050811 | 2.806866 | 2.583205 | 2.770758 | 3.003334 | 2.797835 | 3.168613 | 3.13324  | 3.017836 | 3.059627 | 2.855129 | 3.09627  | 2.95193  | 3.42295  | 3.268274 | 3.254111 | 0.301697 | 0.116    | 0.0106   | 0.0113   | 0.001733 | 1.3587 | 13 |
| 5400_at   | YFL030W | AGX1   | 6.289742 | 6.201974 | 5.984157 | 8.322006 | 8.421405 | 7.409136 | 7.936786 | 7.944056 | 8.069516 | 10.11271 | 9.568415 | 9.764425 | 10.16345 | 9.507453 | 9.593572 | 9.714326 | 0.935    | -0.487   | 4.31E-07 | 4.61E-07 | 14.62369 | 4      |    |
| 5401_at   | YFL029C | CAK1   | 4.9697   | 5.099757 | 4.595583 | 5.280402 | 5.882904 | 4.746158 | 4.986178 | 5.604708 | 5.368602 | 5.326678 | 5.088425 | 5.112314 | 5.426894 | 5.110292 | 4.678608 | 5.272462 | 0.0378   | -0.0805  | 0.229    | 0.025245 | 1.291107 | 13     |    |
| 5402_at   | YFL028C | CAF16  | 7.229396 | 7.108293 | 7.104369 | 6.915307 | 7.048066 | 7.04016  | 7.296955 | 7.089716 | 6.834158 | 6.954904 | 6.74558  | 6.935294 | 5.78837  | 5.679946 | 5.655927 | 6.927742 | -0.352   | -0.14    | 5.41E-08 | 1.14E-07 | 2.622727 | 15     |    |
| 5403_at   | YFL027C | GYP8   | 5.528838 | 5.254271 | 5.248809 | 5.576583 | 5.760107 | 5.243179 | 5.773451 | 5.688885 | 5.241558 | 5.118128 | 5.049442 | 4.867544 | 4.697771 | 4.938304 | 4.791385 | 5.323969 | -0.177   | -0.0641  | 0.00476  | 0.000817 | 1.60437  | 16     |    |
| 5404_at   | YFL026W | STE2   | 3.377219 | 3.219557 | 3.024152 | 3.606486 | 3.59201  | 3.711846 | 3.931495 | 3.842977 | 3.55219  | 3.573757 | 3.584013 | 3.552967 | 3.747279 | 3.713073 | 3.703232 | 3.723076 | 0.105    | -0.0681  | 0.00899  | 0.001416 | 1.395656 | 13     |    |
| 5405_at   | YFL025C | BST1   | 5.227635 | 5.417866 | 4.683795 | 5.139397 | 5.115689 | 4.748936 | 5.098392 | 5.184536 | 4.829163 | 4.589316 | 4.87139  | 4.927    | 5.90058  | 5.130562 | 5.15997  | 4.915142 | 0.0502   | 0.0947   | 0.125    | 0.01469  | 1.35561  | 13     |    |
| 5406_at   | YFL024C | EPL1   | 3.726837 | 3.953564 | 3.799418 | 4.07134  | 3.81113  | 4.004042 | 4.126053 | 3.978735 | 4.133795 | 4.131617 | 4.056796 | 4.53001  | 4.82471  | 4.054014 | 4.729745 | 4.161406 | 0.187    | 0.00481  | 0.00341  | 0.000611 | 1.643421 | 13     |    |
| 5407_at   | YFL023W | BUD27  | 6.690658 | 6.623744 | 6.372548 | 6.394998 | 6.398396 | 6.221388 | 6.818463 | 7.036243 | 6.705333 | 7.185673 | 6.502994 | 6.110823 | 6.808571 | 7.837925 | 7.49092  | 6.570648 | 0.353    | 0.191    | 0.000643 | 0.000145 | 2.904566 | 8      |    |
| 5408_at   | YFL022C | FRS2   | 8.805231 | 9.097722 | 9.006243 | 8.488381 | 8.501205 | 8.600699 | 8.275099 | 8.339932 | 8.166198 | 8.207331 | 7.984745 | 8.304775 | 8.57386  | 8.334707 | 8.424456 | 8.199789 | -0.142   | 0.14     | 8.34E-06 | 4.12E-06 | 1.764838 | 14     |    |
| 5409_at   | YFL021W | GAT1   | 6.84389  | 6.893268 | 7.188053 | 8.64321  | 8.08625  | 7.850662 | 9.202604 | 8.274445 | 9.027882 | 10.63739 | 10.00407 | 10.26449 | 11.95443 | 11.37789 | 11.69797 | 9.59364  | 1.27     | -0.0799  | 7.14E-09 | 3.10E-08 | 29.10392 | 1      |    |
| 5410_f_at | YFL020C | PAU5   | 11.8504  | 11.9316  | 11.98995 | 12.26428 | 12.09754 | 12.36942 | 11.79397 | 11.99641 | 12.21198 | 11.77299 | 12.19871 | 12.56468 | 12.09316 | 11.96636 | 12.39609 | 12.16667 | 0.0506   | -0.0323  | 0.451    | 0.046434 | 1.172884 | 13     |    |
| 5411_at   | YFL019C |        | 3.617315 | 3.877298 | 3.928538 | 3.409712 | 3.844718 | 3.778289 | 3.398606 | 3.422829 | 3.335581 | 3.33673  | 3.517548 | 3.426648 | 3.948025 | 3.6061   | 3.890655 | 3.43862  | -0.00966 | 0.105    | 0.00912  | 0.001433 | 1.309155 | 13     |    |
| 5420_s_at | YFL068W |        | 4.826534 | 5.01155  | 5.141941 | 4.903308 | 5.08622  | 4.830094 | 4.971424 | 4.708214 | 4.857728 | 4.848511 | 4.650238 | 5.271743 | 5.267066 | 5.27733  | 4.839415 | 0.0559   | 0.817    | 0.00208  | 0.0004   | 1.328835 | 13       |        |    |
| 5421_i_at | YFL067W |        | 2.685321 | 2.721197 | 3.138153 | 2.627126 | 2.951602 | 2.765034 | 2.879283 | 2.891196 | 2.848718 | 3.062246 | 2.79341  | 2.722794 | 2.709623 | 2.725261 | 2.974118 | 2.84207  | -0.00333 | -0.0046  | 0.977    | 0.093093 | 1.01646  | 13     |    |
| 5422_s_at | YFL067W |        | 6.896838 | 6.743829 | 6.801096 | 6.67335  | 6.685834 | 6.587088 | 6.548266 | 6.536464 | 6.63535  | 6.557026 | 6.50254  | 6.604759 | 6.252965 | 6.384273 | 6.539179 | -0.115   | 0.0113   | 3.92E-06 | 2.33E-06 | 1.357495 | 16       |        |    |
| 5423_s_at | YFL057C | AAD16  | 8.613044 | 8.869115 | 9.058852 | 8.824155 | 8.455949 | 9.816532 | 9.144148 | 8.69445  | 8.895007 | 9.588875 | 9.954578 | 9.905675 | 9.648247 | 9.857936 | 9.97891  | 9.290059 | 0.327    | 0.00482  | 0.00133  | 0.00272  | 2.376991 | 7      |    |
| 5424_at   | YFL056C | AAD6   | 3.142674 | 3.183046 | 3.668472 | 3.005097 | 3.255909 | 3.501092 | 2.953576 | 2.930915 | 3.083562 | 2.758877 | 3.013444 | 3.039036 | 2.983678 | 3.012585 | 3.267788 | 2.98744  | -0.0767  | 0.0611   | 0.0755   | 0.009361 | 1.311483 | 13     |    |
| 5425_at   | YFL055W | AGP3   | 3.56763  | 3.439049 | 3.709626 | 3.395757 | 3.309258 | 3.410842 | 3.974097 | 3.087478 | 3.049754 | 3.02785  | 3.271797 | 3.214085 | 3.12427  | 2.97336  | 3.317998 | 3.087141 | -0.101   | 0.0664   | 0.00884  | 0.001395 | 1.38063  | 13     |    |
| 5426_at   | YFL054C |        | 4.232982 | 4.611537 | 4.716236 | 4.479267 | 4.439943 | 4.877823 | 3.949241 | 3.848581 | 4.117965 | 4.067952 | 4.139653 | 3.872012 | 4.282092 | 4.047632 | 4.304285 | 4.088868 | -0.101   | 0.0816   | 0.0414   | 0.005487 | 1.434335 | 13     |    |
| 5427_at   | YFL053W | DAK2   | 5.421585 | 5.48457  | 5.378774 | 5.364393 | 5.216742 | 5.188769 | 5.112482 | 5.323851 | 5.591742 | 5.355334 | 5.450572 | 4.921569 | 5.254702 | 5.121739 | 5.249854 | 5.319811 | -0.069   | 0.00167  | 0.289    | 0.031058 | 1.206632 | 13     |    |
| 5428_at   | YFL052W |        | 3.259769 | 3.023558 | 2.83391  | 3.157647 | 3.081856 | 3.267728 | 2.979481 | 3.085592 | 3.3799   | 3.129078 | 3.1196   | 3.026001 | 3.035947 | 3.286299 | 2.878311 | 3.142977 | -0.00179 | -0.0234  | 0.666    | 0.065898 | 1.060164 | 16     |    |
| 5429_at   | YFL051C |        | 6.226774 | 5.689394 | 5.718148 | 5.538935 | 5.34811  | 5.540131 | 5.291596 | 5.843577 | 6.100708 | 5.990923 | 5.5887   | 5.503315 | 5.142272 |          |          |          |          |          |          |          |          |        |    |

|         |                |          |          |          |          |          |          |          |          |          |          |          |          |          |          |          |          |          |          |          |          |          |    |
|---------|----------------|----------|----------|----------|----------|----------|----------|----------|----------|----------|----------|----------|----------|----------|----------|----------|----------|----------|----------|----------|----------|----------|----|
| 5535_at | YER186C        | 6.681516 | 6.602258 | 6.394062 | 6.535157 | 6.508674 | 6.360594 | 6.399714 | 6.488846 | 6.39251  | 6.308148 | 6.382342 | 6.186342 | 6.126904 | 5.768566 | 5.936559 | 6.350583 | -0.159   | -0.0272  | 3.41E-05 | 1.27E-05 | 1.52423  | 16 |
| 5536_at | YER187W        | 7.757966 | 7.579807 | 7.702013 | 7.982031 | 8.034484 | 8.723592 | 8.185434 | 8.49162  | 8.300937 | 8.469308 | 8.178038 | 8.337188 | 8.032027 | 8.068308 | 8.495601 | 8.393797 | 0.119    | -0.122   | 0.00644  | 0.001064 | 1.627668 | 13 |
| 5537_at | YER188W        | 3.452827 | 3.356792 | 3.058634 | 3.192543 | 3.129649 | 3.46766  | 3.081121 | 3.344814 | 3.393618 | 3.226826 | 3.299027 | 3.199791 | 3.102042 | 3.102236 | 3.378767 | 3.25237  | -0.0244  | -0.00304 | 0.704    | 0.069321 | 1.066727 | 13 |
| 5538_at | YEL020W-TIM9   | 8.601846 | 8.842007 | 9.401263 | 9.659949 | 9.603474 | 9.9031   | 9.257165 | 9.588931 | 9.321906 | 8.877535 | 7.54494  | 8.419799 | 7.182896 | 7.165318 | 7.345169 | 9.274165 | -0.49    | -0.317   | 2.27E-07 | 2.94E-07 | 4.854162 | 17 |
| 5539_at | YER039C-A      | 6.135775 | 5.363665 | 4.463433 | 5.674414 | 5.565292 | 5.427008 | 6.247829 | 6.212044 | 6.492651 | 6.960764 | 6.435507 | 5.546719 | 6.214377 | 5.72254  | 5.690339 | 6.227334 | 0.172    | -0.179   | 0.0757   | 0.009387 | 2.023996 | 9  |
| 5540_at | YER091C-A      | 3.657258 | 3.747993 | 3.534189 | 3.770798 | 3.466293 | 3.9262   | 3.523003 | 3.715049 | 3.764141 | 3.832001 | 3.667769 | 3.518601 | 5.092803 | 4.51941  | 4.400151 | 3.71265  | 0.239    | 0.126    | 0.000132 | 3.83E-05 | 2.040757 | 8  |
| 5541_at | YER006c-a      | 3.963452 | 3.851993 | 3.862687 | 3.903295 | 3.898991 | 4.156058 | 3.565117 | 3.782483 | 3.916648 | 3.899042 | 3.825001 | 3.685417 | 4.037678 | 4.388062 | 3.934452 | 3.83247  | 0.0432   | 0.051    | 0.106    | 0.012669 | 1.211485 | 13 |
| 5542_at | YER148W SPT15  | 8.937677 | 8.995733 | 8.580961 | 8.551085 | 8.716633 | 8.105807 | 8.691658 | 8.736619 | 8.637341 | 9.166599 | 8.771382 | 8.436728 | 9.234425 | 8.919498 | 9.044441 | 8.651842 | 0.0829   | 0.0778   | 0.0667   | 0.008411 | 1.380103 | 13 |
| 5543_at | YER149C PEA2   | 6.947514 | 7.087818 | 6.935321 | 6.882372 | 7.121709 | 6.781458 | 6.864698 | 6.988935 | 6.786786 | 6.564437 | 6.479314 | 6.593347 | 6.476031 | 6.411004 | 6.298484 | 6.719382 | -0.173   | -0.00542 | 4.46E-05 | 1.57E-05 | 1.5822   | 16 |
| 5544_at | YER150W SP11   | 8.257403 | 7.776998 | 8.020797 | 10.71975 | 10.31277 | 10.93196 | 11.29712 | 11.50509 | 11.73813 | 11.9632  | 11.9111  | 12.40672 | 12.83832 | 12.42558 | 13.09    | 12.04478 | 1.19     | -0.445   | 2.99E-09 | 1.86E-08 | 23.51027 | 2  |
| 5545_at | YER151C UBP3   | 4.962632 | 5.332604 | 5.973811 | 5.088356 | 5.013037 | 5.272977 | 5.253511 | 5.092567 | 5.086555 | 5.396624 | 5.117617 | 5.353468 | 5.842109 | 5.639393 | 5.767153 | 5.174983 | 0.0964   | 0.111    | 0.0102   | 0.001579 | 1.524397 | 13 |
| 5546_at | YER152C        | 9.423475 | 9.245533 | 9.457314 | 9.890309 | 9.522888 | 10.20578 | 10.14949 | 10.50354 | 10.34972 | 9.979739 | 10.36444 | 10.26051 | 9.802821 | 9.966889 | 10.14719 | 10.24138 | 0.143    | -0.156   | 0.00323  | 0.000582 | 1.838149 | 9  |
| 5547_at | YER153C PET122 | 6.452299 | 6.254042 | 6.354087 | 6.188767 | 5.98996  | 6.332476 | 5.930594 | 6.466247 | 6.234509 | 6.07082  | 6.336626 | 5.805096 | 6.092813 | 5.869277 | 5.992962 | 6.117922 | -0.0933  | 0.0131   | 0.0635   | 0.008041 | 1.280695 | 13 |
| 5548_at | YER154W OXA1   | 8.728986 | 8.497359 | 8.094376 | 8.669586 | 8.686251 | 8.816715 | 8.791461 | 9.300301 | 8.884585 | 8.787026 | 9.191948 | 8.994881 | 8.007459 | 8.666838 | 8.413129 | 8.932644 | -0.0158  | -0.147   | 0.0132   | 0.001982 | 1.451794 | 12 |
| 5549_at | YER155C BEM2   | 7.232792 | 7.506262 | 7.133067 | 7.120019 | 7.312058 | 7.374539 | 7.619757 | 7.552549 | 7.482293 | 7.715568 | 7.644173 | 7.993881 | 7.483726 | 7.573189 | 8.046288 | 7.612132 | 0.135    | -0.0365  | 0.0223   | 0.00315  | 1.431252 | 13 |
| 5550_at | YER156C        | 7.115749 | 7.308851 | 7.696866 | 6.648826 | 6.652906 | 6.826036 | 6.146615 | 6.581837 | 6.277804 | 6.562518 | 6.360656 | 6.076575 | 6.951301 | 7.806354 | 6.540792 | 6.311057 | -0.0767  | 0.255    | 0.00176  | 0.000344 | 2.097997 | 14 |
| 5551_at | YER157W COG3   | 4.600486 | 4.838284 | 4.107302 | 4.41816  | 4.945108 | 4.493695 | 4.856245 | 4.546238 | 4.40557  | 4.773158 | 4.146746 | 4.406296 | 4.180531 | 4.501009 | 3.954298 | 4.494675 | -0.0997  | -0.0337  | 0.221    | 0.024479 | 1.302558 | 13 |
| 5552_at | YER158C        | 7.236128 | 7.029375 | 6.555171 | 7.840006 | 8.151637 | 7.934336 | 9.000962 | 8.961897 | 8.767258 | 9.341779 | 9.413791 | 9.142248 | 8.932956 | 8.982703 | 9.734893 | 9.107018 | 0.756    | -0.204   | 3.86E-08 | 9.16E-08 | 7.428154 | 4  |
| 5553_at | YER159C BUR6   | 7.739548 | 8.253116 | 8.248808 | 7.913342 | 8.045356 | 8.372747 | 8.268857 | 8.240502 | 8.087911 | 9.059111 | 8.459954 | 8.715849 | 8.419713 | 8.589215 | 9.812285 | 8.460733 | 0.422    | 0.106    | 1.43E-06 | 1.12E-06 | 3.088157 | 7  |
| 5554_at | YER161C SPT2   | 6.091145 | 6.10081  | 4.902257 | 5.199938 | 4.846236 | 5.330794 | 5.642447 | 6.110666 | 5.69071  | 6.50626  | 6.21921  | 5.929024 | 6.767817 | 6.704835 | 5.669795 | 5.829692 | 0.391    | 0.129    | 0.00332  | 0.000597 | 2.817223 | 8  |
| 5555_at | YER162C RAD4   | 4.282891 | 4.456728 | 3.859399 | 4.428485 | 4.361666 | 4.482452 | 5.105815 | 4.948221 | 4.519187 | 5.832303 | 5.308631 | 4.881046 | 6.939317 | 6.919303 | 5.896979 | 5.003873 | 0.524    | 0.0238   | 1.87E-05 | 7.72E-06 | 4.00883  | 7  |
| 5556_at | YER163C        | 7.611495 | 7.761695 | 7.945047 | 8.01869  | 7.924789 | 8.480019 | 8.481106 | 8.731794 | 8.268024 | 8.920985 | 9.020298 | 9.380354 | 9.081899 | 9.416116 | 9.477648 | 8.783139 | 0.438    | -0.0689  | 5.69E-06 | 3.09E-06 | 3.195809 | 7  |
| 5557_at | YER164W CHD1   | 5.058752 | 5.039906 | 4.945879 | 4.836503 | 4.710235 | 4.85649  | 5.104588 | 5.276078 | 4.799008 | 5.541932 | 5.214625 | 5.576127 | 6.031103 | 6.023414 | 6.111956 | 5.17965  | 0.3      | 0.0926   | 3.7E-06  | 2.24E-06 | 2.215377 | 8  |
| 5558_at | YER165W PAB1   | 9.701715 | 9.512871 | 9.289969 | 9.44506  | 9.13865  | 9.57495  | 9.417072 | 9.71392  | 9.626039 | 8.977242 | 9.365059 | 9.99726  | 8.599148 | 8.926232 | 9.292591 | 9.463394 | -0.133   | -0.0694  | 0.0543   | 0.006986 | 1.485285 | 16 |
| 5559_at | YER166W DNF1   | 7.367101 | 7.596973 | 7.068823 | 7.258413 | 7.441137 | 7.602981 | 8.031497 | 7.580673 | 7.515638 | 7.725411 | 7.708057 | 7.831453 | 7.607929 | 8.646938 | 8.508445 | 7.720207 | 0.348    | 0.0873   | 0.000015 | 6.46E-06 | 2.517476 | 8  |
| 5560_at | YER167W BCK2   | 6.302845 | 6.682068 | 5.841429 | 6.960691 | 7.088144 | 6.891883 | 7.614415 | 7.55269  | 7.100793 | 7.683875 | 7.30138  | 7.465349 | 6.769996 | 7.100923 | 7.311109 | 7.448111 | 0.211    | -0.216   | 0.000605 | 0.000138 | 2.36948  | 8  |
| 5561_at | YER168C CCA1   | 5.747067 | 5.889576 | 5.81343  | 5.712361 | 5.721905 | 5.625303 | 5.84607  | 5.879198 | 5.568644 | 5.66735  | 5.637058 | 5.95827  | 5.880458 | 5.765794 | 6.15548  | 5.731275 | 0.0336   | 0.0384   | 0.134    | 0.015693 | 1.157723 | 13 |
| 5562_at | YER169W RPH1   | 6.479193 | 6.293711 | 5.967478 | 6.622289 | 6.445417 | 6.113064 | 6.856042 | 7.173918 | 6.957018 | 7.142954 | 7.259442 | 7.141632 | 8.38005  | 7.997939 | 7.642072 | 7.026918 | 0.467    | 0.2031   | 8.43E-06 | 4.16E-06 | 3.449089 | 7  |
| 5563_at | YER170W ADK2   | 5.203247 | 5.018025 | 3.872498 | 4.643992 | 4.997236 | 4.351812 | 4.722111 | 4.646613 | 4.470682 | 4.26557  | 4.126078 | 3.636426 | 3.815434 | 3.960469 | 6.330466 | 4.330256 | -0.269   | -0.0183  | 0.0137   | 0.002045 | 2.041931 | 16 |
| 5564_at | YER171W RAD3   | 5.634389 | 5.860124 | 5.187895 | 5.372274 | 5.333899 | 5.372445 | 5.748668 | 5.538222 | 5.285242 | 5.896969 | 5.834231 | 5.903973 | 5.99125  | 4.917163 | 4.713976 | 5.402186 | -0.152   | -0.055   | 0.0318   | 0.004336 | 1.500041 | 16 |
| 5565_at | YER125W RSP5   | 8.522999 | 8.331345 | 6.737784 | 8.244061 | 8.146864 | 7.988211 | 8.514007 | 8.773422 | 8.827536 | 8.663134 | 8.463499 | 9.023538 | 8.677449 | 8.572884 | 9.13312  | 8.660765 | 0.252    | -0.0949  | 0.0453   | 0.005949 | 1.948727 | 9  |
| 5566_at | YER126C PNA    | 9.752032 | 9.442557 | 8.805128 | 8.61566  | 8.930424 | 8.378565 | 8.463436 | 8.994891 | 8.230643 | 8.027896 | 7.636026 | 6.866089 | 6.444148 | 6.500846 | 6.954972 | 7.960549 | -0.808   | -0.039   | 1.15E-06 | 9.38E-07 | 8.510667 | 18 |
| 5567_at | YER127W LCP5   | 7.54574  | 7.52746  | 7.305195 | 7.144201 | 7.24533  | 6.918467 | 7.492322 | 7.39612  | 6.893968 | 7.817221 | 7.106568 | 6.466552 | 6.307296 | 6.300397 | 5.895902 | 7.103365 | -0.306   | -0.0826  | 0.00224  | 0.000425 | 2.252883 | 16 |
| 5568_at | YER128W        | 5.672353 | 5.817392 | 5.842932 | 5.57919  | 5.555037 | 5.514396 | 5.530983 | 5.679163 | 5.43151  | 5.869344 | 5.950589 | 5.813396 | 5.462317 | 5.530935 | 5.152878 | 5.503995 | -0.0858  | 0.0116   | 0.0741   | 0.000212 | 1.255268 | 13 |
| 5569_at | YER129W SAK1   | 5.854205 | 5.63089  | 5.459937 | 5.377552 | 5.496673 | 5.455709 | 5.631883 | 5.765068 | 5.679035 | 5.606078 | 5.606990 | 5.467819 | 5.687729 | 5.539217 | 5.519969 | 5.563226 | -0.00968 | 0.0115   | 0.84     | 0.08117  | 1.044313 | 13 |
| 5570_at | YER130C        | 7.01504  | 6.781931 | 6.423804 | 6.797986 | 6.846336 | 6.285547 | 7.244526 | 6.982434 | 7.082821 | 8.113863 | 7.962514 | 7.95665  | 8.51987  | 8.501108 | 8.036167 | 7.39664  | 0.482    | 0.0319   | 0.000044 | 1.55E-05 | 3.585689 | 7  |
| 5571_at | YER131W RPS26B | 10.28976 | 10.45597 | 10.64748 | 9.289422 | 9.328915 | 9.335554 | 8.086473 | 8.320937 | 7.729761 | 7.047912 | 7.02127  | 7.267728 | 6.571672 | 7.818757 | 7.12627  | 7.643557 | -0.922   | 0.334    | 6.32E-07 | 6.06E-07 | 11.51337 | 20 |
| 5572_at | YER132C PCD1   | 7.603891 | 7.072035 | 6.850563 | 6.835961 | 6.743032 | 6.858956 | 6.982702 | 6.835297 | 6.919507 | 6.816419 | 7.115389 | 6.824968 | 7.042491 | 6.988586 | 6.905294 | 6.86308  | -0.0123  | 0.0425   | 0.211    | 0.023408 | 1.13068  | 13 |
| 5573_at | YER133W GLC7   | 6.368389 | 6.044936 | 4.074741 | 5.592198 | 5.898855 | 5.085252 | 7.006007 | 6.757111 | 6.483531 | 7.31236  | 6.400391 | 5.748281 | 6.613266 | 5.129644 | 6.21287  | 6.463335 | 0.146    | -0.201   | 0.308    | 0.032898 | 2.058885 | 9  |
| 5574_at | YER133W GLC7   | 9.567983 | 9.379281 | 8.356759 | 9.384238 | 9.266195 | 8.641333 | 9.743942 | 9.592919 | 9.134891 | 9.865923 | 9.521244 | 9.15277  | 9.762137 | 9.002334 | 9.190667 | 9.436388 | 0.0767   | -0.0666  | 0.471    | 0.048239 | 1.329206 | 13 |
| 5575_at | YER134C        | 6.743546 | 6.613507 | 6.405426 | 6.975339 | 7.036038 | 7.049133 | 7.114378 | 7.125322 | 7.024575 | 6.63689  | 6.653898 | 6.883372 | 6.137878 | 6.12386  | 6.13568  | 6.957906 | -0.143   | -0.161   | 3.23E-06 | 2.02E-06 | 1.855422 | 15 |
| 5576_at | YER135C        | 3.789204 | 3.745997 | 3.542735 | 3.8      |          |          |          |          |          |          |          |          |          |          |          |          |          |          |          |          |          |    |

|           |                |          |          |          |          |          |          |          |          |          |          |          |          |          |          |          |          |         |         |          |          |          |    |
|-----------|----------------|----------|----------|----------|----------|----------|----------|----------|----------|----------|----------|----------|----------|----------|----------|----------|----------|---------|---------|----------|----------|----------|----|
| 5608_at   | YER123W YCK3   | 5.100283 | 5.309509 | 4.128102 | 4.599751 | 4.478015 | 4.376193 | 4.588297 | 4.870147 | 5.314125 | 4.859745 | 4.816895 | 4.859214 | 4.702097 | 4.205738 | 4.435808 | 4.79012  | -0.0775 | -0.0446 | 0.404    | 0.041988 | 1.270018 | 13 |
| 5609_at   | YER124C DSE1   | 4.228758 | 4.322086 | 3.25419  | 4.398663 | 4.57252  | 4.284356 | 4.398111 | 4.552006 | 4.345981 | 3.815169 | 3.838071 | 4.011542 | 3.94772  | 3.990537 | 3.979916 | 4.247203 | -0.0469 | -0.074  | 0.33     | 0.034952 | 1.285392 | 13 |
| 5610_at   | YER082C UTP7   | 6.118435 | 6.338952 | 6.187978 | 5.55248  | 5.580692 | 5.755979 | 5.736678 | 5.643364 | 5.096853 | 5.164488 | 4.927587 | 5.084508 | 5.035996 | 4.55824  | 4.843177 | 5.222115 | -0.37   | 0.08    | 1.78E-06 | 1.30E-06 | 2.669844 | 16 |
| 5611_at   | YER083C GET2   | 8.699944 | 8.856296 | 9.054417 | 8.654247 | 8.377009 | 8.524351 | 8.408461 | 8.485726 | 8.510906 | 8.127712 | 8.296128 | 8.464793 | 7.408215 | 7.578811 | 7.718169 | 8.358195 | -0.316  | -0.0409 | 5.08E-06 | 2.85E-06 | 2.311541 | 16 |
| 5612_at   | YER084W        | 5.683785 | 5.803179 | 6.074789 | 6.410155 | 6.472422 | 6.859496 | 6.746421 | 6.666084 | 6.68241  | 6.936305 | 6.269061 | 6.753319 | 7.089275 | 7.365519 | 6.952479 | 7.038357 | 0.348   | -0.15   | 3.88E-06 | 2.32E-06 | 2.516561 | 9  |
| 5613_at   | YER085C        | 4.006602 | 4.054097 | 4.49483  | 3.981886 | 4.175112 | 4.073813 | 4.397762 | 4.335679 | 3.977945 | 4.680593 | 4.610204 | 3.813919 | 3.965114 | 3.700814 | 3.825852 | 4.165846 | -0.0774 | -0.0459 | 0.181    | 0.020407 | 1.273145 | 13 |
| 5614_at   | YER086W ILV1   | 9.208624 | 9.447005 | 9.255649 | 8.752751 | 8.770652 | 8.990029 | 8.549648 | 8.362186 | 8.690873 | 8.098003 | 8.171921 | 8.624095 | 7.192235 | 6.61897  | 7.978505 | 8.38357  | -0.516  | -0.0282 | 1.91E-05 | 7.86E-06 | 3.922334 | 18 |
| 5615_at   | YER087W        | 6.827153 | 6.790891 | 6.653758 | 6.953073 | 6.962204 | 6.822849 | 7.170407 | 6.885476 | 6.83077  | 6.691734 | 6.239154 | 6.021467 | 5.713249 | 5.244123 | 5.479125 | 6.659667 | -0.361  | -0.146  | 3.14E-06 | 1.99E-06 | 2.696807 | 15 |
| 5616_at   | YER087C-A      | 4.861148 | 4.868449 | 4.640913 | 4.377105 | 4.070087 | 8.513726 | 7.99442  | 8.137485 | 7.861919 | 8.212778 | 8.148512 | 8.307591 | 8.308928 | 8.239511 | 8.097273 | 8.113602 | -0.0833 | 0.0794  | 0.0167   | 0.002441 | 1.385411 | 13 |
| 5617_at   | YER088C DOT6   | 8.979533 | 9.284714 | 8.430357 | 9.585678 | 9.398188 | 9.813709 | 11.31867 | 11.25084 | 10.80689 | 12.00586 | 11.84283 | 12.019   | 10.7148  | 11.58574 | 12.02196 | 11.36944 | 0.756   | -0.346  | 5.78E-05 | 1.95E-05 | 7.807577 | 4  |
| 5618_at   | YER089C PTC2   | 7.848679 | 7.623229 | 7.359249 | 7.258371 | 7.062928 | 7.622177 | 7.236874 | 7.588747 | 7.514687 | 7.543751 | 7.710424 | 7.749081 | 6.103789 | 6.619487 | 6.997024 | 7.465892 | -0.213  | -0.11   | 0.00717  | 0.001167 | 1.882586 | 15 |
| 5619_at   | YER090W TRP2   | 8.585895 | 8.81298  | 8.735956 | 9.70159  | 8.044284 | 8.387805 | 8.785511 | 7.831141 | 7.982805 | 7.623305 | 7.97083  | 8.34419  | 7.480695 | 7.920934 | 8.012261 | 7.887505 | -0.212  | 0.1     | 0.0016   | 0.000318 | 1.792851 | 14 |
| 5620_at   | YER091C MET6   | 10.88416 | 10.78118 | 10.54535 | 11.16719 | 11.10762 | 11.13291 | 11.21329 | 11.1228  | 11.50638 | 11.11367 | 11.12325 | 11.52943 | 9.528594 | 9.598674 | 9.438    | 11.33016 | -0.276  | -0.333  | 2.37E-07 | 3.00E-07 | 3.468476 | 15 |
| 5621_at   | YER092W IES5   | 6.683018 | 6.851541 | 6.966083 | 6.663517 | 6.749519 | 6.839238 | 6.46996  | 6.514517 | 6.40729  | 6.900089 | 6.659095 | 6.52306  | 6.710392 | 6.880974 | 7.125886 | 6.607664 | 0.0223  | 0.0732  | 0.0476   | 0.006196 | 1.2295   | 13 |
| 5622_at   | YER093C TSC11  | 5.562601 | 5.954935 | 5.867399 | 5.911044 | 5.995645 | 6.015284 | 6.318186 | 6.592743 | 6.212203 | 6.934027 | 6.823915 | 7.182304 | 8.489104 | 7.726619 | 7.88641  | 6.6418   | 0.606   | 0.0705  | 8.53E-08 | 1.55E-07 | 4.987321 | 6  |
| 5623_at   | YER093C-A      | 6.465035 | 6.646232 | 6.570334 | 7.463436 | 7.244294 | 7.625443 | 6.907827 | 7.248646 | 7.246922 | 7.563331 | 7.430978 | 7.729071 | 9.251008 | 9.344683 | 8.835517 | 7.544799 | 0.62    | 0.0935  | 6.76E-07 | 6.32E-07 | 5.172613 | 6  |
| 5624_at   | YER093C-A      | 6.692668 | 6.750963 | 6.530584 | 7.267619 | 7.124744 | 7.63638  | 7.003341 | 7.25653  | 7.382966 | 7.520269 | 7.897745 | 7.287007 | 6.095658 | 8.856048 | 8.350684 | 7.461949 | 0.492   | 0.0699  | 3.48E-06 | 2.14E-06 | 3.682069 | 7  |
| 5625_at   | YER094C PUP3   | 10.65087 | 10.3423  | 10.40662 | 10.27979 | 10.34981 | 10.30358 | 10.50278 | 10.61383 | 10.3408  | 10.69741 | 10.57009 | 10.17172 | 10.1548  | 10.13623 | 10.23078 | 10.40369 | -0.0221 | -0.0109 | 0.818    | 0.079276 | 1.066787 | 13 |
| 5626_at   | YER095W RAD51  | 9.314402 | 9.32551  | 8.877967 | 9.336577 | 9.246047 | 9.314610 | 9.160871 | 9.340301 | 9.054093 | 9.748316 | 9.644411 | 9.788851 | 9.110358 | 9.274421 | 9.235423 | 9.455844 | 0.0468  | -0.0757 | 0.111    | 0.013236 | 1.294757 | 13 |
| 5627_at   | YER096W SHC1   | 5.021197 | 4.866407 | 3.529338 | 6.491114 | 6.513251 | 6.192367 | 7.912143 | 8.190052 | 7.506597 | 8.679276 | 8.770713 | 8.435133 | 8.656962 | 8.446564 | 8.869953 | 8.28336  | 1.13    | -0.487  | 1.14E-07 | 1.87E-07 | 1.998855 | 2  |
| 5628_at   | YER097W        | 3.970127 | 3.925382 | 3.389658 | 3.552954 | 3.484679 | 3.863869 | 3.577033 | 3.812573 | 3.800317 | 3.775632 | 3.697512 | 4.195608 | 4.075725 | 4.185691 | 3.658298 | 0.0989   | 0.0808  | 0.00388 | 0.000685 | 1.428975 | 13       |    |
| 5629_at   | YER098W UBP9   | 7.05934  | 6.896916 | 6.336368 | 7.19768  | 7.144681 | 6.99958  | 7.808332 | 7.875101 | 7.600427 | 8.015534 | 7.718721 | 7.436436 | 8.196319 | 7.907224 | 7.989106 | 7.700429 | 0.329   | -0.0864 | 0.000271 | 6.99E-05 | 2.394685 | 7  |
| 5630_at   | YER099C PRS2   | 8.414676 | 8.238361 | 8.064449 | 7.921225 | 9.167701 | 8.08844  | 9.425471 | 8.799249 | 8.106642 | 9.45735  | 8.426037 | 8.135388 | 8.141831 | 8.411216 | 7.732376 | 8.880204 | -0.0234 | -0.144  | 0.256    | 0.027856 | 1.45244  | 12 |
| 5631_at   | YER100W UBC6   | 8.297712 | 8.382732 | 7.70788  | 8.343587 | 8.454166 | 8.178845 | 8.458918 | 8.480056 | 8.22261  | 8.331621 | 7.958452 | 7.940557 | 8.007662 | 7.779571 | 7.939514 | 8.257749 | -0.0797 | -0.0633 | 0.0624   | 0.007921 | 1.327631 | 13 |
| 5632_at   | YER101C AST2   | 6.257832 | 6.279657 | 5.514575 | 6.727494 | 6.590815 | 6.320928 | 7.135065 | 7.111896 | 6.629557 | 7.444403 | 7.063503 | 7.299508 | 7.268243 | 7.370196 | 7.096964 | 7.11592  | 0.335   | -0.136  | 7.45E-05 | 2.40E-05 | 2.429887 | 9  |
| 5633_at   | YER062C HOR2   | 9.343148 | 9.444125 | 9.574827 | 9.673136 | 9.959512 | 9.652459 | 9.306783 | 9.301388 | 9.614956 | 8.997415 | 9.01185  | 8.455799 | 8.239423 | 8.368508 | 9.26837  | 0.000000 | -0.314  | -0.0954 | 2.61E-07 | 3.17E-07 | 2.297819 | 15 |
| 5634_at   | YER063W THO1   | 8.931819 | 8.836486 | 8.365773 | 8.359871 | 8.336664 | 8.436902 | 8.288419 | 8.195032 | 8.22691  | 8.101293 | 8.225071 | 8.061058 | 7.414801 | 7.681016 | 7.453004 | 8.146583 | -0.296  | -0.0104 | 3.52E-06 | 2.16E-06 | 1.911758 | 16 |
| 5635_at   | YER064C        | 7.805497 | 7.591585 | 6.507286 | 6.752066 | 7.107909 | 6.507053 | 6.466165 | 7.391185 | 6.359157 | 6.940401 | 6.592743 | 6.257309 | 6.039596 | 6.684972 | 6.167422 | 6.609599 | -0.248  | 0.0499  | 0.0419   | 0.005543 | 1.927798 | 16 |
| 5636_at   | YER065C ICL1   | 7.629442 | 7.162701 | 6.216388 | 7.556337 | 7.586844 | 7.371939 | 7.721072 | 8.041174 | 7.627876 | 8.076522 | 7.579017 | 7.576718 | 8.4448   | 8.55579  | 7.851838 | 7.809898 | 0.308   | -0.0439 | 0.00663  | 0.001091 | 2.264013 | 7  |
| 5637_at   | YER066W        | 7.604887 | 7.134765 | 6.642455 | 8.371923 | 8.989509 | 8.258834 | 9.171767 | 9.054289 | 9.075295 | 9.314858 | 8.909525 | 9.159858 | 8.306394 | 8.255126 | 8.28974  | 9.144338 | 0.305   | -0.397  | 2.05E-06 | 1.44E-06 | 4.2697   | 10 |
| 5638_g_at | YER066W        | 8.858634 | 8.366435 | 7.737368 | 8.386945 | 8.858706 | 8.678375 | 9.672888 | 9.68208  | 9.591317 | 10.09705 | 9.742655 | 9.420936 | 9.901137 | 9.110272 | 9.580037 | 9.629241 | 0.339   | -0.2    | 0.00102  | 0.000217 | 2.798424 | 9  |
| 5639_at   | YER066C-A      | 4.218718 | 4.366322 | 4.097102 | 4.239349 | 4.070761 | 4.451316 | 4.387406 | 4.074538 | 4.191966 | 4.128465 | 4.114832 | 4.132078 | 4.226761 | 4.47543  | 4.419609 | 4.18875  | 0.0239  | 0.0324  | 0.256    | 0.027833 | 1.122825 | 13 |
| 5640_at   | YER067W        | 8.003124 | 7.075858 | 6.724258 | 8.740458 | 8.35007  | 8.975233 | 8.32022  | 8.568916 | 8.786145 | 8.43797  | 8.461754 | 9.099088 | 9.24146  | 9.592913 | 9.536492 | 8.848374 | 0.499   | -0.122  | 0.000501 | 0.00118  | 3.750215 | 7  |
| 5641_at   | YER068W MOT2   | 5.488606 | 5.766098 | 5.112225 | 5.660786 | 6.000203 | 5.814549 | 5.826439 | 5.817333 | 5.59453  | 6.068922 | 5.825856 | 5.927267 | 6.679652 | 6.676709 | 6.302511 | 5.854576 | 0.282   | 0.0411  | 1.26E-05 | 5.70E-06 | 2.12315  | 7  |
| 5642_at   | YER069W ARG5.6 | 8.621476 | 8.904385 | 9.23837  | 8.12008  | 7.970024 | 8.528175 | 9.088076 | 9.062491 | 8.94761  | 8.850286 | 8.997126 | 9.315588 | 10.51097 | 9.830812 | 10.03074 | 8.833668 | 0.347   | 0.179   | 0.000427 | 0.001033 | 2.799588 | 8  |
| 5643_at   | YER070W RNR1   | 8.66285  | 8.99995  | 8.432363 | 9.317372 | 9.25755  | 9.449622 | 8.550972 | 8.28123  | 8.910127 | 7.239303 | 7.479914 | 7.751666 | 8.46535  | 8.116458 | 8.276019 | 8.293236 | -0.25   | 0.0747  | 0.138    | 0.016052 | 1.941069 | 16 |
| 5644_at   | YER071C        | 7.343488 | 7.576021 | 7.297295 | 7.390087 | 7.481102 | 7.704628 | 7.352515 | 7.376169 | 7.281117 | 7.183128 | 7.137979 | 6.931588 | 6.811587 | 6.355628 | 6.347504 | 7.189994 | -0.249  | -0.0742 | 1.59E-06 | 1.20E-06 | 1.937123 | 16 |
| 5645_at   | YER072W VTC1   | 8.476289 | 8.687099 | 9.106292 | 8.425358 | 8.311848 | 8.808994 | 8.526992 | 8.193768 | 8.210541 | 8.673966 | 8.418567 | 9.260678 | 8.789165 | 8.923781 | 9.23878  | 8.522254 | 0.0868  | 0.0897  | 0.101    | 0.012177 | 1.427927 | 13 |
| 5646_at   | YER073W ALD5   | 7.821855 | 8.250359 | 7.583158 | 7.109604 | 7.361487 | 7.621115 | 7.858092 | 7.245061 | 7.118725 | 7.293856 | 6.858961 | 6.734748 | 6.97408  | 6.6335   | 6.510929 | 7.023925 | -0.286  | 0.0684  | 0.00384  | 0.000678 | 2.137014 | 16 |
| 5647_s_at | YER074W RPS24  | 10.96563 | 11.24749 | 11.55363 | 10.69868 | 10.80254 | 11.10683 | 10.21195 | 10.12547 | 9.887363 | 9.236978 | 8.83355  | 9.733746 | 7.842864 | 8.118062 | 8.676263 | 9.744328 | -0.835  | 0.00536 | 3.96E-07 | 4.34E-07 | 9.143313 | 16 |
| 5648_at   | YER075C PTP3   | 4.822704 | 5.035967 | 4.641529 | 5.201175 | 5.209601 | 5.122738 | 5.431199 | 5.244765 | 5.104274 | 4.857167 | 4.715253 | 4.784275 | 4.858644 | 4.552359 | 5.181444 | 5.141148 | -0.0246 | -0.077  | 0.146    | 0.016875 | 1.254241 | 13 |
| 5649_at   | YER076C        | 7.102112 | 6.84031  | 5.979898 | 6.85718  | 7.0488   |          |          |          |          |          |          |          |          |          |          |          |         |         |          |          |          |    |

|         |          |       |          |           |          |          |          |          |           |          |          |          |          |          |          |          |          |          |          |          |          |          |          |    |
|---------|----------|-------|----------|-----------|----------|----------|----------|----------|-----------|----------|----------|----------|----------|----------|----------|----------|----------|----------|----------|----------|----------|----------|----------|----|
| 5680_at | YER025W  | GCD11 | 10.02868 | 9.959724  | 8.480767 | 9.058862 | 9.400011 | 8.54405  | 9.546908  | 9.496661 | 9.257528 | 9.420514 | 9.420124 | 8.984118 | 9.352662 | 8.556082 | 8.477489 | 9.213505 | -0.146   | -0.0268  | 0.342    | 0.036104 | 1.47171  | 16 |
| 5681_at | YER026C  | CHO1  | 7.403799 | 7.719481  | 7.425015 | 8.087834 | 7.873333 | 7.761678 | 8.108816  | 8.193907 | 8.25264  | 7.625042 | 7.821297 | 8.287664 | 7.363336 | 7.120298 | 7.696261 | 8.068365 | -0.0422  | -0.168   | 0.00167  | 0.000329 | 1.582639 | 12 |
| 5682_at | YER027C  | GAL83 | 7.643251 | 7.469187  | 7.18951  | 7.565763 | 7.484414 | 7.321089 | 7.691475  | 7.416194 | 7.421682 | 7.367552 | 7.683485 | 7.766394 | 7.200781 | 6.783002 | 7.544183 | 7.544476 | -0.0492  | -0.0678  | 0.131    | 0.015349 | 1.272093 | 13 |
| 5683_at | YER028C  | MIG3  | 9.532709 | 5.696475  | 6.10687  | 6.070112 | 1.197863 | 6.317498 | 6.052538  | 6.233279 | 6.445889 | 5.726997 | 6.190529 | 6.667487 | 5.032296 | 4.819712 | 5.116666 | 6.230852 | -0.225   | -0.215   | 3.51E-05 | 1.30E-05 | 2.41925  | 15 |
| 5684_at | YER029C  | SMB1  | 7.613674 | 7.698566  | 8.425562 | 7.660009 | 7.437881 | 7.351958 | 6.995386  | 7.518615 | 7.158821 | 7.068123 | 6.801481 | 7.003148 | 6.43586  | 6.594804 | 6.777859 | 7.079688 | -0.343   | 0.0521   | 5.29E-05 | 1.82E-05 | 2.428574 | 16 |
| 5685_at | YER030W  | CHZ1  | 7.17606  | 7.367412  | 8.027196 | 7.429895 | 7.06207  | 6.961825 | 6.923964  | 7.180336 | 6.563919 | 6.878697 | 6.53109  | 6.336015 | 6.369171 | 5.315876 | 5.773555 | 6.717803 | -0.441   | -0.0122  | 0.000136 | 3.93E-05 | 3.220871 | 16 |
| 5686_at | YER031C  | YPT31 | 9.066385 | 9.365458  | 9.651469 | 8.783571 | 9.047467 | 8.957229 | 8.752309  | 8.7346   | 8.576319 | 8.151693 | 8.285071 | 7.952522 | 6.738971 | 6.91565  | 7.414704 | 8.38087  | -0.612   | -0.051   | 1.98E-08 | 5.86E-08 | 5.064981 | 18 |
| 5687_at | YER032W  | FIR1  | 5.710087 | 6.20135   | 5.881854 | 5.825007 | 5.705184 | 6.157179 | 5.394271  | 5.403824 | 5.547012 | 5.028647 | 5.175575 | 5.511697 | 4.398349 | 4.846044 | 5.11712  | 5.405385 | -0.316   | -0.0082  | 0.000232 | 6.14E-05 | 2.310133 | 16 |
| 5688_at | YER033C  | ZR8   | 5.686842 | 5.899311  | 5.275297 | 6.352713 | 6.326426 | 6.576169 | 6.887801  | 6.719981 | 6.689983 | 6.966763 | 7.039562 | 7.089887 | 6.941701 | 7.263504 | 7.712391 | 6.957671 | 0.433    | -0.136   | 1.78E-06 | 1.29E-06 | 3.149038 | 7  |
| 5689_at | YER034W  |       | 5.769132 | 5.940514  | 6.135407 | 6.692567 | 6.544813 | 6.74426  | 6.741141  | 6.53986  | 6.787033 | 6.722505 | 6.665802 | 6.586652 | 5.403831 | 5.856636 | 5.80264  | 6.754017 | -0.0742  | -0.255   | 5.2E-07  | 5.28E-07 | 2.039903 | 12 |
| 5690_at | YER035W  | EDC2  | 9.102672 | 8.883803  | 9.232286 | 10.12203 | 10.13266 | 10.20096 | 10.2202   | 10.51966 | 10.59816 | 11.04326 | 10.80439 | 11.09673 | 11.16229 | 11.66687 | 11.72486 | 10.81933 | 0.665    | -0.121   | 9.12E-11 | 3.41E-09 | 5.830625 | 6  |
| 5691_at | YER036C  | ARB1  | 10.39469 | 10.47888  | 9.673814 | 9.906661 | 9.969014 | 9.604867 | 10.2909   | 10.52348 | 10.30877 | 10.53083 | 10.246   | 10.00381 | 10.47919 | 10.29886 | 10.39295 | 10.18833 | 0.0768   | 0.0204   | 0.418    | 0.043285 | 1.225765 | 13 |
| 5692_at | YER037W  | PHM8  | 5.991164 | 5.705847  | 5.208898 | 8.196816 | 8.830274 | 8.114468 | 9.780004  | 9.547401 | 9.593329 | 10.63046 | 9.959199 | 9.632177 | 10.72391 | 10.64639 | 10.72527 | 10.05588 | 1.27     | -0.515   | 1.97E-08 | 5.86E-08 | 28.9908  | 2  |
| 5693_at | YER038C  | KRE29 | 3.998072 | 3.626559  | 3.267134 | 3.719105 | 3.911683 | 3.716239 | 3.824239  | 3.726569 | 3.943967 | 3.867039 | 3.93597  | 3.629528 | 3.736424 | 4.067853 | 3.721526 | 3.836754 | 0.0487   | -0.0269  | 0.38     | 0.039729 | 1.154352 | 13 |
| 5694_at | YER039C  | HVG1  | 7.605836 | 7.217294  | 6.746392 | 7.849449 | 7.81407  | 7.839369 | 7.975995  | 7.996553 | 7.727912 | 8.285511 | 8.211089 | 7.507894 | 8.284255 | 8.382135 | 7.801587 | 8.032986 | 0.232    | -0.0958  | 0.00418  | 0.000729 | 1.849063 | 9  |
| 5695_at | YER040W  | GLN3  | 4.083244 | 4.022872  | 3.029417 | 4.025045 | 4.048542 | 3.781168 | 4.228625  | 4.326738 | 4.366848 | 4.356196 | 4.45478  | 4.657347 | 4.058497 | 4.154009 | 4.099347 | 4.364715 | 0.126    | -0.119   | 0.0171   | 0.00249  | 1.676287 | 9  |
| 5696_at | YER041W  | YEN1  | 6.488551 | 6.376993  | 6.087424 | 6.817208 | 6.712524 | 6.383475 | 6.897628  | 6.949599 | 6.738962 | 6.653508 | 6.608618 | 6.663894 | 6.356575 | 6.345442 | 6.327376 | 6.765068 | -0.00568 | -0.129   | 0.00229  | 0.000443 | 1.340673 | 12 |
| 5697_at | YER042W  | MXR1  | 7.533556 | 7.469353  | 7.0847   | 8.399082 | 8.158283 | 8.129458 | 8.811812  | 8.837581 | 8.680033 | 9.047247 | 8.961123 | 9.288846 | 7.356349 | 7.533846 | 7.476331 | 8.935934 | 0.07     | -0.425   | 5.76E-07 | 5.66E-07 | 3.129033 | 11 |
| 5698_at | YER043C  | SAH1  | 9.990228 | 10.0592   | 9.199313 | 10.29498 | 10.28005 | 10.13334 | 10.44759  | 10.57908 | 10.59567 | 10.63489 | 10.57574 | 11.06401 | 9.431902 | 9.196537 | 9.660592 | 10.63975 | -0.0461  | -0.293   | 0.000143 | 4.09E-05 | 2.28813  | 12 |
| 5699_at | YER044C  | ERG28 | 10.63556 | 10.83639  | 10.86192 | 10.90374 | 10.91347 | 11.01398 | 10.95897  | 11.00744 | 11.08451 | 11.15238 | 11.31829 | 10.30587 | 10.62722 | 10.59742 | 11.10606 | -0.0444  | -0.129   | 0.000281 | 7.19E-05 | 1.452942 | 12       |    |
| 5700_at | YER044C- | MEI4  | 3.640205 | 3.465833  | 2.951833 | 3.508893 | 3.557783 | 3.451544 | 3.368858  | 3.570681 | 3.454065 | 3.639542 | 3.369956 | 3.207393 | 4.175957 | 4.097869 | 3.69548  | 3.476766 | 0.141    | 0.0564   | 0.01219  | 0.001939 | 1.47148  | 13 |
| 5701_at | YER002W  | NOP16 | 8.002653 | 8.3203    | 7.864742 | 7.753535 | 8.089551 | 7.497576 | 8.342476  | 8.461123 | 7.700461 | 9.261021 | 8.469618 | 8.38601  | 9.111155 | 8.934604 | 8.818798 | 8.323641 | 0.287    | 0.0424   | 0.00657  | 0.001083 | 2.141562 | 7  |
| 5702_at | YER003C  | PMI40 | 9.294599 | 9.541663  | 9.285331 | 9.226316 | 9.288047 | 9.423791 | 9.866647  | 9.026651 | 9.189767 | 8.971282 | 8.962239 | 9.328233 | 8.359144 | 8.723121 | 8.832806 | 9.094465 | -0.186   | -0.0233  | 0.000662 | 0.000149 | 1.636637 | 16 |
| 5703_at | YER004W  | FMP52 | 9.618309 | 9.1985    | 8.973362 | 9.836351 | 9.862855 | 9.904631 | 10.07033  | 10.40641 | 10.4992  | 10.69991 | 10.95004 | 11.16056 | 10.53593 | 10.8077  | 11.00123 | 10.6252  | 0.433    | -0.17    | 4.48E-06 | 2.58E-06 | 3.174658 | 7  |
| 5704_at | YER005W  | YND1  | 7.561298 | 7.391918  | 6.785995 | 7.242208 | 7.233525 | 7.571801 | 7.757794  | 8.005492 | 7.628562 | 7.656646 | 7.586286 | 7.590898 | 7.889479 | 7.659103 | 7.602128 | 7.658404 | 0.119    | -0.0508  | 0.0752   | 0.009342 | 1.372657 | 13 |
| 5705_at | YER006W  | NUG1  | 8.319689 | 8.606903  | 7.937835 | 7.787934 | 8.047511 | 7.925312 | 7.923444  | 8.076923 | 7.642591 | 8.26179  | 8.19729  | 7.265668 | 9.346116 | 8.921728 | 8.470437 | 7.810022 | 0.143    | 0.218    | 0.00171  | 0.000337 | 2.112861 | 8  |
| 5706_at | YER007W  | PAC2  | 5.543089 | 5.407835  | 5.050703 | 5.306804 | 5.420993 | 5.279383 | 5.313515  | 5.518958 | 5.141347 | 5.585493 | 5.316916 | 4.995231 | 5.363365 | 5.260781 | 5.026134 | 5.313128 | -0.0307  | -0.0103  | 0.679    | 0.007045 | 1.084899 | 13 |
| 5707_at | YER007C- | TMA20 | 9.038034 | 9.339009  | 9.917013 | 8.947422 | 8.85697  | 9.150143 | 8.407369  | 8.39087  | 8.164133 | 7.698877 | 7.530241 | 7.391001 | 6.356361 | 6.657587 | 7.93565  | 7.969722 | -0.779   | 0.0167   | 6.13E-08 | 1.22E-05 | 7.892719 | 18 |
| 5708_at | YER008C  | SEC3  | 6.538851 | 6.788192  | 6.306231 | 6.585419 | 6.513454 | 6.830742 | 7.218965  | 6.849312 | 6.69861  | 7.034566 | 6.999362 | 7.182895 | 7.384724 | 7.565369 | 7.380682 | 6.970796 | 0.242    | 0.00412  | 0.000116 | 3.45E-05 | 1.8971   | 7  |
| 5709_at | YER009W  | NTF2  | 9.977752 | 10.18859  | 10.30897 | 9.52647  | 9.498724 | 9.931694 | 9.9122394 | 9.820223 | 9.142743 | 8.381116 | 8.684749 | 9.079699 | 7.425241 | 7.815748 | 7.802055 | 8.947413 | -0.65    | -0.00524 | 4.38E-08 | 1.00E-05 | 5.602961 | 18 |
| 5710_at | YER010C  |       | 7.832975 | 7.778971  | 7.838711 | 8.099655 | 8.112522 | 8.196836 | 8.266431  | 8.29898  | 8.413221 | 8.189615 | 8.331015 | 8.754333 | 7.81604  | 8.163712 | 8.073034 | 8.381184 | 0.0626   | -0.129   | 0.000691 | 0.000154 | 1.510094 | 12 |
| 5711_at | YER011W  | TIR1  | 13.61633 | 13.471445 | 13.47428 | 13.09819 | 12.87964 | 12.8831  | 12.33333  | 12.25978 | 12.62092 | 12.01756 | 12.59094 | 12.87113 | 12.22826 | 12.6676  | 12.52991 | 12.4363  | -0.266   | 0.156    | 0.000317 | 7.96E-05 | 2.234377 | 14 |
| 5712_at | YER012W  | PRE1  | 8.620471 | 8.845981  | 8.651212 | 8.66274  | 8.549836 | 8.641816 | 8.623236  | 8.753066 | 8.588617 | 8.390225 | 8.400911 | 8.685082 | 7.511474 | 7.705577 | 7.734217 | 5.544355 | -0.261   | -0.102   | 1.38E-07 | 2.14E-07 | 2.036594 | 15 |
| 5713_at | YER013W  | PRP22 | 5.772526 | 5.752678  | 5.434349 | 5.90598  | 5.916739 | 5.613722 | 6.163476  | 6.203351 | 5.816218 | 5.999601 | 6.004517 | 5.784239 | 6.316662 | 6.466714 | 5.840096 | 5.969756 | 0.137    | -0.0118  | 0.031    | 0.004237 | 1.437057 | 13 |
| 5714_at | YER014W  | HEM14 | 8.83519  | 8.840135  | 8.710872 | 7.931679 | 8.155837 | 8.199368 | 7.968311  | 7.904202 | 7.737882 | 7.724207 | 7.292356 | 6.996796 | 7.78684  | 7.736107 | 7.266839 | 7.560673 | -0.334   | 0.176    | 7.36E-06 | 3.75E-06 | 2.623351 | 14 |
| 5715_at | YER015W  | FAA2  | 4.587902 | 4.781263  | 3.429252 | 5.552815 | 5.368431 | 5.065034 | 5.839271  | 6.04429  | 5.866682 | 4.843224 | 4.875038 | 5.619949 | 4.657283 | 4.509615 | 4.608113 | 5.594039 | 0.0272   | -0.312   | 0.00736  | 0.001193 | 2.227886 | 12 |
| 5716_at | YER016W  | BIM1  | 6.686871 | 6.653558  | 5.368525 | 6.280263 | 6.2513   | 6.007537 | 5.651207  | 5.930124 | 5.346521 | 5.631325 | 5.488469 | 5.126027 | 6.48599  | 5.051626 | 5.490576 | 5.562123 | -0.0991  | 0.136    | 0.173    | 0.01958  | 1.631297 | 14 |
| 5717_at | YER017C  | AFG3  | 8.59218  | 7.688636  | 7.711142 | 8.512415 | 8.382133 | 8.296558 | 9.376608  | 9.366332 | 9.196158 | 10.02385 | 9.89869  | 9.845907 | 10.90807 | 10.62898 | 10.73284 | 9.477478 | 0.677    | 0.0111   | 4.53E-06 | 2.60E-06 | 6.013373 | 6  |
| 5718_at | YER018C  | SPC25 | 7.57882  | 7.738221  | 8.033197 | 9.142478 | 9.102328 | 9.153613 | 9.111879  | 9.233069 | 9.270819 | 9.200478 | 9.460469 | 9.579582 | 9.031672 | 8.712033 | 8.461185 | 9.465725 | 0.148    | -0.373   | 3.05E-07 | 3.59E-07 | 3.127963 | 10 |
| 5719_at | YER019W  | ISC1  | 9.399704 | 8.910714  | 8.432444 | 9.022273 | 8.974557 | 8.734576 | 8.692303  | 9.031702 | 8.443701 | 8.452107 | 8.566342 | 8.302079 | 8.214334 | 8.150416 | 7.892869 | 8.612373 | -0.232   | -0.0278  | 0.000257 | 0.000478 | 1.852017 | 16 |
| 5720_at | YER019C- | SBH2  | 10.12044 | 10.47918  | 10.63882 | 10.3945  | 10.46296 | 10.74186 | 10.1584   | 10.29486 | 1        |          |          |          |          |          |          |          |          |          |          |          |          |    |

|           |         |         |          |          |          |          |          |          |          |          |          |          |          |           |          |          |          |          |         |         |          |          |          |    |
|-----------|---------|---------|----------|----------|----------|----------|----------|----------|----------|----------|----------|----------|----------|-----------|----------|----------|----------|----------|---------|---------|----------|----------|----------|----|
| 5752_at   | YEL038W | UTR4    | 7.984813 | 7.980709 | 8.426176 | 8.350271 | 8.239172 | 8.405021 | 8.067512 | 8.244475 | 8.42822  | 9.05465  | 9.096114 | 9.275847  | 8.21197  | 7.675919 | 8.588496 | 8.687702 | 0.0793  | -0.155  | 0.0716   | 0.008953 | 1.652474 | 12 |
| 5753_at   | YEL037C | RAD23   | 8.264934 | 8.320638 | 8.311567 | 8.120419 | 8.112086 | 8.395202 | 8.44502  | 8.389001 | 8.49824  | 8.952631 | 8.77211  | 8.826319  | 8.583428 | 8.22816  | 8.949998 | 8.541939 | 0.123   | -0.0328 | 0.0822   | 0.010105 | 1.386572 | 13 |
| 5754_at   | YEL036C | ANP1    | 8.441153 | 8.785966 | 8.722196 | 8.662099 | 8.626739 | 8.475645 | 8.842604 | 8.809176 | 8.502713 | 9.081435 | 8.937455 | 8.600871  | 8.266155 | 7.990436 | 7.845589 | 8.726233 | -0.153  | -0.0926 | 0.00352  | 0.006028 | 1.617004 | 15 |
| 5755_at   | YEL035C | UTR5    | 4.470764 | 4.62129  | 5.049213 | 5.05102  | 4.753337 | 4.843069 | 4.8258   | 5.13541  | 4.885188 | 5.008808 | 5.394135 | 4.834473  | 5.507638 | 4.822375 | 5.163678 | 5.026361 | 0.132   | -0.0171 | 0.0535   | 0.006881 | 1.418838 | 13 |
| 5756_at   | YEL034W | HPY2    | 12.38607 | 12.31855 | 12.22886 | 12.66759 | 12.68186 | 12.48622 | 12.71426 | 12.96321 | 12.96453 | 12.94301 | 12.91345 | 13.040265 | 11.41113 | 11.5731  | 11.79525 | 12.89572 | -0.152  | -0.263  | 1.45E-06 | 1.13E-06 | 3.279448 | 15 |
| 5757_at   | YEL033W |         | 5.26374  | 5.563854 | 4.996022 | 5.538899 | 5.50316  | 5.745581 | 5.726894 | 6.055295 | 5.84401  | 6.364946 | 5.928091 | 6.340269  | 6.894639 | 6.954903 | 7.121392 | 6.94140  | 0.432   | 0.0122  | 7.38E-07 | 6.69E-07 | 3.144591 | 7  |
| 5758_at   | YEL032W | MCM3    | 6.457434 | 6.572828 | 5.513431 | 6.595277 | 6.614286 | 6.560398 | 7.005066 | 7.121465 | 7.146767 | 7.299486 | 7.443142 | 7.242345  | 6.986717 | 7.439337 | 7.595113 | 7.183846 | 0.319   | -0.12   | 0.000441 | 0.000106 | 2.330646 | 9  |
| 5759_at   | YEL031W | SPF1    | 8.837904 | 9.036222 | 8.869536 | 8.664305 | 8.603505 | 8.973492 | 8.948504 | 8.427559 | 8.470384 | 8.274983 | 8.602648 | 9.227999  | 9.139528 | 9.07007  | 9.217745 | 8.680586 | 0.061   | 0.104   | 0.0416   | 0.005508 | 1.411385 | 13 |
| 5760_at   | YEL030W | ECM10   | 5.000893 | 4.9573   | 4.600171 | 4.932691 | 4.777747 | 4.953724 | 5.036225 | 5.395828 | 5.383689 | 5.843341 | 5.588086 | 5.349528  | 5.442024 | 5.695694 | 5.217791 | 5.365469 | 0.193   | -0.0644 | 0.00528  | 0.000895 | 1.668152 | 9  |
| 5761_at   | YEL029C | BUD16   | 6.385316 | 6.485716 | 5.825801 | 5.553751 | 5.960296 | 5.678479 | 6.120541 | 5.88065  | 5.862938 | 5.872922 | 5.718181 | 5.389356  | 5.045317 | 5.38054  | 4.666519 | 5.698539 | -0.29   | -0.0232 | 0.00079  | 0.000173 | 2.158689 | 16 |
| 5762_at   | YEL028W |         | 5.825527 | 5.969473 | 5.375925 | 5.826059 | 5.785183 | 6.073709 | 6.020202 | 6.022086 | 6.01433  | 5.988983 | 5.811705 | 5.836645  | 5.414954 | 5.42876  | 5.363297 | 5.949976 | -0.0842 | -0.107  | 0.000666 | 0.00015  | 1.477595 | 12 |
| 5763_at   | YEL027W | CUP5    | 12.26879 | 12.36039 | 12.13502 | 11.9296  | 11.83102 | 12.05511 | 11.96525 | 11.93924 | 11.81584 | 11.66225 | 11.60649 | 11.53386  | 10.86995 | 11.06954 | 10.85376 | 11.70927 | -0.338  | -0.0331 | 2.33E-09 | 1.70E-08 | 2.450969 | 16 |
| 5764_at   | YEL026W | SNU13   | 11.0325  | 11.19919 | 11.37016 | 10.68354 | 10.63387 | 11.0771  | 11.01326 | 10.54409 | 10.19107 | 10.34623 | 10.37326 | 10.34477  | 9.57281  | 10.28337 | 9.793392 | 10.33106 | -0.33   | 0.0589  | 0.000169 | 4.71E-05 | 2.398261 | 16 |
| 5765_at   | YEL025C |         | 5.154438 | 4.839707 | 4.442754 | 5.016286 | 5.120492 | 4.775653 | 5.704097 | 5.479717 | 5.483867 | 5.236016 | 5.015884 | 4.977904  | 4.539527 | 4.576189 | 4.435927 | 5.254147 | -0.0813 | -0.165  | 0.00464  | 0.000801 | 1.679929 | 12 |
| 5766_at   | YEL024W | RIP1    | 9.657215 | 9.967374 | 7.639418 | 10.70042 | 10.66234 | 9.766183 | 11.5848  | 11.56473 | 11.50687 | 11.73965 | 11.50881 | 11.29998  | 10.4148  | 10.11651 | 10.00817 | 11.56187 | 0.378   | -0.579  | 6.82E-05 | 2.23E-05 | 7.457294 | 10 |
| 5767_at   | YEL023C |         | 4.498906 | 4.279959 | 4.139592 | 4.355774 | 4.456475 | 4.230044 | 4.332146 | 4.462426 | 4.312723 | 4.423128 | 4.187846 | 4.297559  | 4.178106 | 4.230514 | 4.020977 | 4.337721 | -0.044  | -0.0309 | 0.0615   | 0.007814 | 1.158579 | 13 |
| 5768_at   | YEL022W | GEA2    | 4.358351 | 4.672947 | 4.003421 | 3.972015 | 3.952674 | 4.127709 | 3.584319 | 3.823573 | 3.487533 | 3.350737 | 3.36276  | 3.262772  | 3.250985 | 3.466356 | 3.70063  | 3.503802 | -0.252  | 0.115   | 0.000138 | 3.96E-05 | 1.981883 | 14 |
| 5769_at   | YEL065W | SIT1    | 5.363702 | 5.471863 | 5.011964 | 5.198819 | 5.637389 | 5.474581 | 5.438738 | 5.248322 | 5.266694 | 5.139448 | 4.999624 | 4.857728  | 4.743609 | 4.504021 | 4.833154 | 5.203556 | -0.178  | -0.0557 | 0.000868 | 0.000188 | 1.602228 | 16 |
| 5770_at   | YEL064C | AVT2    | 5.320265 | 5.140503 | 4.462162 | 4.947575 | 4.97474  | 4.286739 | 4.677211 | 4.669165 | 4.982944 | 4.55336  | 4.679267 | 4.430368  | 4.265629 | 4.387143 | 5.923569 | 4.741821 | 0.175   | 0.19    | 0.00608  | 0.000102 | 2.097216 | 8  |
| 5771_at   | YEL063C | CAN1    | 7.776599 | 7.434683 | 6.921346 | 8.853807 | 8.51886  | 7.894413 | 8.945451 | 9.053177 | 9.328306 | 9.140232 | 8.891634 | 9.235323  | 8.802785 | 8.496645 | 8.800888 | 9.136798 | 0.336   | -0.302  | 6.07E-05 | 2.02E-05 | 3.565781 | 10 |
| 5772_at   | YEL062W | NPR2    | 4.718878 | 4.781234 | 3.590516 | 4.678901 | 4.742855 | 4.590919 | 4.498784 | 5.09384  | 4.828015 | 5.135943 | 5.108934 | 5.206156  | 4.347078 | 5.459669 | 3.974917 | 5.036535 | 0.0115  | -0.199  | 0.0106   | 0.001639 | 1.647521 | 12 |
| 5773_at   | YEL061C | CIN8    | 3.43308  | 3.674613 | 3.062931 | 3.296107 | 3.098286 | 3.180202 | 3.250877 | 3.182675 | 3.195853 | 3.598884 | 3.093532 | 3.145522  | 5.917922 | 5.373955 | 4.971753 | 3.252368 | 0.492   | 0.32    | 6.18E-07 | 5.98E-07 | 4.898242 | 8  |
| 5774_at   | YEL060C | PRB1    | 9.894013 | 9.79498  | 8.957527 | 10.43377 | 10.40721 | 10.30508 | 11.01314 | 11.0779  | 11.03299 | 11.54087 | 11.32039 | 11.42272  | 11.3812  | 11.51075 | 11.46333 | 11.24078 | 0.512   | -0.207  | 8.36E-07 | 7.38E-07 | 3.881248 | 7  |
| 5775_at   | YEL059C | -J-SOM1 | 8.370892 | 8.746657 | 9.109355 | 8.824036 | 8.800221 | 9.345223 | 9.232307 | 9.336566 | 8.07796  | 8.800879 | 8.209603 | 8.244527  | 8.352613 | 8.888453 | 8.173279 | 8.319354 | -0.114  | 0.0893  | 0.214    | 0.023711 | 1.490335 | 14 |
| 5776_at   | YEL059W |         | 6.362358 | 6.087805 | 5.755028 | 5.949982 | 5.737958 | 5.961586 | 5.878976 | 6.143651 | 6.028499 | 6.133709 | 6.480384 | 6.537482  | 7.086497 | 6.284184 | 6.390873 | 6.010775 | 0.14    | 0.0853  | 0.027    | 0.003737 | 1.553749 | 13 |
| 5777_at   | YEL058W | PCM1    | 9.442274 | 9.276572 | 9.263955 | 8.933215 | 8.921094 | 9.137864 | 9.286725 | 8.976165 | 9.532485 | 9.688128 | 9.30301  | 9.848676  | 9.726362 | 9.46973  | 9.244604 | 9.07775  | 0.131   | 0.066   | 0.00725  | 0.001179 | 1.468994 | 13 |
| 5778_at   | YEL057C |         | 6.805866 | 6.253153 | 5.995075 | 5.889801 | 5.901138 | 5.872865 | 5.245068 | 5.37077  | 5.339427 | 4.462164 | 4.483205 | 4.280277  | 4.14174  | 4.601868 | 4.299359 | 4.913356 | -0.582  | 0.129   | 2.68E-06 | 1.75E-06 | 4.677139 | 18 |
| 5779_at   | YEL056W | HAT2    | 6.97806  | 7.154262 | 6.410161 | 6.520741 | 6.439738 | 6.557102 | 6.458277 | 6.722079 | 6.605585 | 6.948643 | 6.735808 | 6.655787  | 5.807101 | 6.017123 | 5.771582 | 6.585548 | -0.21   | -0.0696 | 0.00329  | 0.000592 | 1.744254 | 16 |
| 5780_at   | YEL055C | POL5    | 6.225184 | 6.488137 | 6.008566 | 5.993957 | 5.878434 | 6.103785 | 5.983641 | 6.049967 | 5.592208 | 5.472266 | 5.53215  | 5.635643  | 4.8248   | 5.080015 | 5.108507 | 5.696243 | -0.326  | -0.0196 | 1.65E-06 | 1.23E-06 | 2.375087 | 16 |
| 5781_i_at | YEL054C | RPL12A  | 12.47779 | 12.5374  | 12.32902 | 11.77656 | 11.9109  | 12.07372 | 11.70889 | 11.68937 | 11.46852 | 10.50082 | 10.55159 | 10.37305  | 8.291598 | 8.363594 | 8.679263 | 11.01857 | -1.06   | -0.155  | 2.75E-13 | 1.65E-10 | 16.69038 | 20 |
| 5782_at   | YEL053C | MAK10   | 4.60117  | 5.000127 | 4.38034  | 4.62929  | 4.653155 | 4.443672 | 4.410261 | 4.432338 | 4.243528 | 4.271519 | 4.097448 | 4.392785  | 3.946788 | 4.311795 | 3.837923 | 4.326642 | -0.184  | -0.0012 | 0.000746 | 0.000165 | 1.629299 | 16 |
| 5783_at   | YEL052W | AFG1    | 6.883784 | 6.994685 | 6.12165  | 7.688768 | 7.794035 | 7.31304  | 8.141695 | 8.14609  | 7.805813 | 8.521544 | 8.31917  | 8.42062   | 6.752023 | 6.990498 | 6.724635 | 8.249483 | 0.0827  | -0.418  | 6.87E-06 | 3.56E-06 | 3.136407 | 11 |
| 5784_at   | YEL051W | VMA8    | 8.325738 | 8.803577 | 9.126782 | 8.028991 | 8.041967 | 8.393237 | 8.243906 | 7.858482 | 8.081786 | 8.703488 | 7.602819 | 7.984526  | 7.020873 | 6.555094 | 7.022687 | 7.858343 | -0.465  | -0.0169 | 5.59E-06 | 3.04E-06 | 3.430163 | 16 |
| 5785_at   | YEL050C | RML2    | 7.599237 | 7.611886 | 7.025129 | 7.909245 | 8.046766 | 7.788649 | 8.212554 | 7.844588 | 7.731674 | 7.871538 | 7.210544 | 7.488531  | 7.426912 | 7.326599 | 7.116983 | 7.805507 | -0.0726 | -0.12   | 0.0342   | 0.004625 | 1.493386 | 12 |
| 5786_f_at | YEL049W | PAU2    | 11.61981 | 11.72272 | 11.90527 | 12.08535 | 12.01771 | 12.14547 | 11.35478 | 11.76756 | 11.81222 | 11.25764 | 11.85603 | 12.31471  | 11.873   | 11.96319 | 11.95696 | 11.83973 | 0.027   | 0.00569 | 0.892    | 0.085664 | 1.074218 | 13 |
| 5787_at   | YEL048C |         | 4.283419 | 4.179536 | 3.454367 | 3.886034 | 4.341355 | 3.802716 | 4.274455 | 3.850137 | 3.865475 | 3.970603 | 3.702711 | 3.536353  | 3.628896 | 3.670053 | 3.44784  | 3.879698 | -0.117  | -0.0264 | 0.105    | 0.012585 | 1.364872 | 16 |
| 5788_at   | YEL047C |         | 9.945619 | 9.887033 | 9.329218 | 9.021107 | 9.046455 | 9.401846 | 8.931616 | 8.730768 | 8.539773 | 8.117233 | 8.255058 | 8.570968  | 9.02373  | 8.954439 | 8.406261 | 8.530575 | -0.273  | 0.204   | 0.00016  | 4.50E-05 | 2.543046 | 14 |
| 5789_at   | YEL046C | GLY1    | 9.73263  | 9.075015 | 8.125327 | 8.536168 | 8.853877 | 8.777005 | 9.483815 | 9.669232 | 9.797821 | 10.17815 | 9.829348 | 9.469974  | 9.73791  | 8.743987 | 8.963057 | 9.524091 | 0.121   | -0.141  | 0.257    | 0.027921 | 1.707776 | 9  |
| 5790_at   | YEL045C |         | 5.104979 | 4.929396 | 4.531004 | 4.957515 | 5.137714 | 4.730806 | 5.090577 | 5.051871 | 5.052693 | 4.983748 | 4.878551 | 4.925614  | 5.34328  | 5.074207 | 5.017297 | 4.945666 | 0.0533  | 0.014   | 0.241    | 0.04256  | 1.151781 | 13 |
| 5791_at   | YEL044W | IES6    | 7.507982 | 7.348262 | 7.917114 | 7.7728   | 7.951207 | 7.800955 | 7.528729 | 7.620951 | 7.524171 | 7.852211 | 7.462458 | 7.785128  | 7.734184 | 6.962282 | 7.401226 | 7.697388 | -0.0612 | -0.0574 | 0.176    | 0.019965 | 1.26854  | 13 |
| 5808_i_at | YEL043W | A       | 3.125874 | 3.145265 | 3.672382 | 3.052006 | 3.154298 | 3.220734 | 3.605883 | 2.96964  | 3.211392 | 3.795499 | 3.507577 |           |          |          |          |          |         |         |          |          |          |    |

|         |                |          |          |           |          |          |           |          |          |          |          |          |          |          |          |          |          |          |         |          |          |          |    |
|---------|----------------|----------|----------|-----------|----------|----------|-----------|----------|----------|----------|----------|----------|----------|----------|----------|----------|----------|----------|---------|----------|----------|----------|----|
| 5944_at | YDR520C        | 6.101184 | 6.220331 | 5.457106  | 6.558945 | 6.560264 | 5.982831  | 6.855091 | 6.857239 | 6.477804 | 6.701159 | 6.684579 | 6.647943 | 6.448137 | 6.730823 | 6.107791 | 6.670558 | 0.129    | -0.147  | 0.0096   | 0.001499 | 1.754523 | 9  |
| 5945_at | YDR521W        | 4.653517 | 4.401116 | 3.979635  | 4.508386 | 4.226475 | 4.217978  | 4.541909 | 4.361663 | 4.511907 | 4.307402 | 4.935351 | 3.917098 | 4.261143 | 4.078904 | 4.037957 | 4.323146 | -0.0597  | -0.0282 | 0.242    | 0.026512 | 1.187622 | 13 |
| 5946_at | YDR522C SPS2   | 3.683741 | 3.624099 | 3.628224  | 3.597539 | 3.578308 | 3.647939  | 3.808261 | 3.793052 | 3.724163 | 3.623545 | 3.804566 | 3.520367 | 4.149853 | 3.916328 | 4.068233 | 3.694802 | 0.115    | 0.0536  | 0.00219  | 0.000417 | 1.391527 | 13 |
| 5947_at | YDR523C SPS1   | 3.744367 | 3.6344   | 3.477994  | 3.769284 | 3.615956 | 3.487564  | 3.952717 | 3.952879 | 3.527544 | 3.956672 | 4.157669 | 3.94961  | 9.965547 | 6.664674 | 8.079522 | 4.261282 | 1.18     | 0.458   | 1.39E-07 | 2.14E+07 | 2.493217 | 3  |
| 5948_at | YDR524C AGE1   | 6.029806 | 6.149201 | 5.392604  | 6.33728  | 6.34492  | 5.812842  | 6.326529 | 6.311678 | 6.244111 | 6.353932 | 6.373732 | 6.622333 | 7.718912 | 6.77121  | 7.429047 | 6.407873 | 0.36     | 0.0493  | 0.0002   | 5.43E-05 | 2.599382 | 7  |
| 5949_at | YDR525W ABE2   | 3.22122  | 3.274057 | 3.493635  | 3.222148 | 3.414393 | 3.384483  | 3.306174 | 3.231281 | 2.916512 | 3.471632 | 3.297738 | 3.18653  | 4.417215 | 3.191714 | 3.414862 | 3.261094 | 0.00663  | 0.0213  | 0.678    | 0.06693  | 1.052289 | 13 |
| 5950_at | YDR526C        | 5.02864  | 5.040934 | 5.30682   | 4.819796 | 4.86557  | 4.795106  | 5.118193 | 4.999608 | 4.904469 | 5.214408 | 5.035194 | 4.640889 | 5.169796 | 4.599515 | 4.664633 | 4.913282 | -0.0631  | 0.0114  | 0.361    | 0.03788  | 1.182093 | 13 |
| 5951_at | YDR527W RBA50  | 5.286631 | 5.44824  | 5.548695  | 5.194782 | 4.979031 | 4.69902   | 5.609381 | 5.499296 | 5.151511 | 6.139304 | 5.706924 | 5.592908 | 5.956374 | 5.289052 | 5.803534 | 5.462323 | 0.131    | 0.0153  | 0.21     | 0.023354 | 1.413427 | 13 |
| 5952_at | YDR528W HLR1   | 5.233653 | 5.35355  | 5.712573  | 5.851342 | 6.086829 | 5.815237  | 5.938343 | 5.755182 | 6.044809 | 5.633103 | 5.794947 | 6.136825 | 6.289155 | 5.817993 | 5.88791  | 5.958986 | 0.121    | -0.063  | 0.0307   | 0.004209 | 1.414527 | 13 |
| 5953_at | YDR529C QCR7   | 9.855176 | 9.817322 | 9.931704  | 11.28561 | 11.18036 | 11.31943  | 11.48222 | 11.45769 | 11.60256 | 11.39107 | 11.36424 | 11.87611 | 10.61977 | 10.03862 | 10.90947 | 11.6698  | 0.151    | -0.401  | 8E-07    | 7.10E-07 | 3.36122  | 13 |
| 5954_at | YDR530C APA2   | 7.867005 | 8.035238 | 8.150748  | 8.770077 | 8.503687 | 8.619765  | 8.642442 | 8.760245 | 8.91478  | 8.566526 | 9.117326 | 9.294822 | 9.746386 | 8.436937 | 9.51673  | 8.946531 | 0.307    | -0.0866 | 0.00216  | 0.000412 | 1.25471  | 9  |
| 5955_at | YDR531W        | 9.197022 | 9.229285 | 9.227115  | 8.96993  | 9.022841 | 8.364702  | 8.602301 | 8.394341 | 8.246151 | 8.254722 | 8.25442  | 8.189798 | 6.977037 | 7.026631 | 7.188873 | 8.301988 | -0.542   | -0.0447 | 1.01E-07 | 1.71E-07 | 4.206606 | 18 |
| 5956_at | YDR532C        | 2.76768  | 2.917641 | 4.091698  | 3.287412 | 3.293825 | 3.173143  | 3.171573 | 3.232194 | 2.881146 | 3.268346 | 3.208224 | 3.200159 | 4.549861 | 3.213261 | 4.511824 | 3.195688 | 0.2      | 0.134   | 0.0311   | 0.004252 | 1.925106 | 8  |
| 5957_at | YDR533C HSP31  | 10.26464 | 10.39839 | 10.79897  | 11.96149 | 11.62718 | 11.95399  | 12.2682  | 12.19917 | 12.54821 | 12.11485 | 12.34245 | 12.58364 | 12.36013 | 12.14968 | 12.59753 | 12.46299 | 0.454    | -0.28   | 1.71E-06 | 1.26E-06 | 4.092786 | 10 |
| 5958_at | YDR489W SLD5   | 5.249297 | 5.385713 | 5.314023  | 5.330519 | 5.417199 | 4.792547  | 5.273018 | 5.122266 | 4.807659 | 4.864514 | 4.776704 | 5.150714 | 4.319232 | 4.776864 | 4.492937 | 4.993607 | -0.203   | -0.0191 | 0.00138  | 0.000281 | 1.714241 | 16 |
| 5959_at | YDR490C PKH1   | 8.884211 | 8.844481 | 8.25764   | 9.539904 | 9.55208  | 9.048119  | 10.50201 | 9.628638 | 9.363217 | 10.30281 | 9.739519 | 10.20048 | 9.133782 | 9.02093  | 9.168533 | 9.905949 | 0.148    | -0.284  | 0.000167 | 4.68E-05 | 2.519058 | 12 |
| 5960_at | YDR491C        | 4.997968 | 5.48533  | 5.393294  | 5.158591 | 5.053163 | 5.40302   | 5.408477 | 5.380511 | 5.176727 | 5.438896 | 5.51349  | 5.303818 | 5.341294 | 5.444759 | 5.92947  | 5.351492 | 0.0857   | 0.0199  | 0.109    | 0.012982 | 1.255028 | 13 |
| 5961_at | YDR492W IZH1   | 11.35314 | 11.22126 | 10.54265  | 11.46292 | 11.59247 | 10.98848  | 12.11465 | 11.95318 | 11.75949 | 12.34106 | 12.15372 | 12.29467 | 11.87656 | 11.47907 | 11.85148 | 12.03503 | 0.224    | -0.185  | 0.00184  | 0.000359 | 2.243402 | 9  |
| 5962_at | YDR493W FMP36  | 6.543084 | 6.583012 | 6.739650  | 7.408204 | 7.25131  | 7.277686  | 7.167124 | 7.02359  | 6.91382  | 7.836331 | 7.005364 | 7.23104  | 8.296406 | 7.494942 | 7.988606 | 7.338533 | 0.312    | -0.011  | 0.000821 | 0.000179 | 2.286633 | 7  |
| 5963_at | YDR494W SPM28  | 8.341238 | 8.234311 | 7.33969   | 8.889435 | 9.010448 | 7.905296  | 9.554538 | 9.269878 | 8.959688 | 10.02872 | 9.358373 | 8.848406 | 8.604815 | 7.316337 | 7.340258 | 9.288738 | -0.00932 | -0.399  | 0.0037   | 0.000655 | 2.64802  | 11 |
| 5964_at | YDR495C RSM3   | 3.73724  | 3.670193 | 4.30413   | 3.770955 | 3.720833 | 3.822812  | 3.675151 | 3.746007 | 3.594665 | 3.575988 | 3.738331 | 4.165494 | 4.309948 | 3.953167 | 4.012685 | 3.763788 | 0.0815   | 0.0481  | 0.149    | 0.017155 | 1.288877 | 13 |
| 5965_at | YDR496C PUF6   | 6.266021 | 6.59714  | 6.699912  | 5.54813  | 5.904242 | 5.293585  | 5.570312 | 5.637772 | 5.137804 | 5.14003  | 4.964585 | 4.413645 | 4.261993 | 3.813631 | 3.740472 | 5.032245 | -0.66    | 0.0516  | 2.38E-07 | 3.00E-07 | 5.754605 | 18 |
| 5966_at | YDR497C ITR1   | 9.335581 | 9.716157 | 9.344738  | 10.45296 | 10.44348 | 10.62672  | 10.90319 | 10.71857 | 10.92723 | 10.84602 | 10.83821 | 11.14383 | 10.61206 | 9.960809 | 10.89478 | 10.98069 | 0.255    | -0.274  | 0.00013  | 5.81E-06 | 2.923638 | 10 |
| 5967_at | YDR498C SEC20  | 8.345657 | 8.360345 | 8.662932  | 8.097468 | 8.066748 | 7.984602  | 7.611602 | 7.731136 | 7.695835 | 6.976063 | 7.506893 | 7.09733  | 6.744579 | 7.024119 | 6.809897 | 7.446487 | -0.438   | 0.0616  | 1.75E-07 | 2.46E-07 | 3.192323 | 16 |
| 5968_at | YDR499W LCD1   | 5.267297 | 5.421265 | 5.664569  | 5.340098 | 5.5622   | 5.192449  | 5.327906 | 5.156645 | 5.425851 | 5.703356 | 5.404893 | 5.211775 | 5.351185 | 4.955219 | 5.246829 | 5.359195 | -0.0531  | -0.0128 | 0.373    | 0.039047 | 1.15128  | 13 |
| 5969_at | YDR500C RPL37B | 12.078   | 12.24821 | 12.49427  | 12.06355 | 11.99167 | 12.234516 | 11.32126 | 11.57927 | 11.70809 | 11.23717 | 11.32311 | 11.66576 | 11.21878 | 11.13075 | 11.5192  | 11.54599 | -0.278   | 0.0701  | 0.000474 | 0.000113 | 2.088951 | 16 |
| 5970_at | YDR501W PLM2   | 4.165604 | 4.24043  | 3.345448  | 3.554517 | 3.342551 | 4.170325  | 3.229644 | 3.422743 | 3.614707 | 3.538723 | 3.346801 | 3.450866 | 3.327506 | 3.383809 | 3.616492 | 3.44131  | -0.122   | 0.0665  | 0.101    | 0.01211  | 1.430535 | 16 |
| 5971_at | YDR502C SAM2   | 10.18654 | 10.39692 | 9.818868  | 11.02536 | 11.14093 | 11.039    | 11.10772 | 10.97019 | 11.48456 | 11.45779 | 11.28377 | 11.76104 | 9.9409   | 10.31598 | 10.62652 | 11.42646 | 0.0585   | -0.333  | 1.19E-05 | 4.47E-06 | 2.457204 | 12 |
| 5972_at | YDR503C SAM2   | 4.094678 | 4.336288 | 3.770108  | 4.27505  | 4.331704 | 4.480282  | 4.343394 | 4.315128 | 4.194489 | 4.543466 | 4.390856 | 4.282903 | 4.177964 | 4.216923 | 4.323313 | 4.392242 | 0.0426   | -0.0642 | 0.0418   | 0.00553  | 1.250672 | 13 |
| 5973_at | YDR504C SPP3   | 7.457119 | 7.73916  | 6.927538  | 6.878627 | 6.33213  | 7.989391  | 9.458277 | 9.538044 | 9.243473 | 9.999119 | 9.883954 | 10.35629 | 8.800416 | 9.181327 | 9.220432 | 9.676739 | 0.951    | -0.411  | 1.36E-05 | 5.99E-06 | 6.13547  | 10 |
| 5974_at | YDR505C PSP1   | 4.69133  | 4.636601 | 3.584365  | 4.893534 | 4.813321 | 4.422776  | 5.583391 | 5.784493 | 5.62263  | 6.369762 | 6.135714 | 6.260979 | 4.928404 | 4.837238 | 4.90274  | 5.827215 | 0.241    | -0.351  | 0.00116  | 0.00024  | 3.448588 | 10 |
| 5975_at | YDR506C        | 5.501445 | 5.597641 | 5.018188  | 6.145585 | 5.857285 | 5.935399  | 6.335082 | 6.632131 | 6.421868 | 6.377793 | 6.890791 | 6.010742 | 6.868479 | 5.992679 | 5.781438 | 6.414269 | 0.13     | -0.228  | 0.00174  | 0.000342 | 1.214422 | 12 |
| 5976_at | YDR507C GIN4   | 5.896168 | 6.256804 | 5.384379  | 5.845733 | 5.438204 | 5.411152  | 5.252746 | 5.472404 | 5.336488 | 5.477381 | 5.544969 | 5.366636 | 5.383467 | 5.677374 | 5.459927 | 5.363397 | -0.0537  | 0.093   | 0.0632   | 0.000809 | 1.365082 | 13 |
| 5977_at | YDR508C GNP1   | 8.086944 | 8.475431 | 8.163293  | 8.589076 | 8.596073 | 8.678857  | 8.418038 | 8.794108 | 8.462528 | 8.36361  | 8.542748 | 8.435612 | 8.68846  | 5.163334 | 4.885394 | 4.336251 | -0.835   | 0.61    | 6.48E-09 | 2.96E-08 | 1.76621  | 13 |
| 5978_at | YDR509W        | 3.869023 | 3.73956  | 3.286448  | 3.557925 | 3.529242 | 3.582374  | 3.152839 | 3.378677 | 3.515457 | 3.442548 | 3.675066 | 3.273959 | 3.458611 | 3.765199 | 3.501753 | 3.42078  | -0.0124  | 0.0508  | 0.298    | 0.031962 | 1.15345  | 16 |
| 5979_at | YDR510W SMT3   | 8.34062  | 9.023291 | 9.364866  | 8.588154 | 8.613418 | 8.915806  | 8.548602 | 8.442461 | 8.47899  | 8.534593 | 8.580524 | 8.890124 | 8.189671 | 8.32656  | 8.464114 | 8.556499 | -0.153   | 0.0287  | 0.0188   | 0.002716 | 1.500947 | 16 |
| 5980_at | YDR466W PKH3   | 7.11064  | 7.059432 | 7.189432  | 7.144398 | 7.257889 | 7.064902  | 7.404233 | 7.379795 | 7.263308 | 6.76766  | 6.871024 | 6.590956 | 6.418504 | 6.164027 | 6.414993 | 7.033597 | -0.232   | -0.0838 | 2.91E-05 | 1.11E-05 | 1.855    | 16 |
| 5981_at | YDR467C        | 5.962772 | 6.184219 | 6.204861  | 5.736088 | 5.71495  | 6.008451  | 5.227474 | 5.404612 | 5.466740 | 5.09143  | 5.389708 | 4.99959  | 5.097979 | 5.213712 | 5.071377 | 5.298585 | -0.275   | 0.0935  | 1.49E-05 | 6.46E-06 | 2.074311 | 13 |
| 5982_at | YDR468C TLG1   | 6.725802 | 6.834402 | 6.877146  | 6.071256 | 6.149324 | 6.216302  | 6.088915 | 5.9513   | 5.90801  | 5.958646 | 5.478611 | 5.511774 | 4.604654 | 4.840747 | 4.455986 | 5.745063 | -0.557   | -0.0153 | 9.31E-09 | 3.64E-08 | 4.382334 | 18 |
| 5983_at | YDR469W UDC1   | 5.08046  | 5.380934 | 5.134491  | 4.656396 | 4.998906 | 4.904564  | 4.455985 | 4.698998 | 4.550041 | 4.828044 | 4.774124 | 4.565576 | 3.995336 | 4.31354  | 3.93368  | 4.621281 | -0.261   | 0.00409 | 0.000208 | 5.60E-05 | 1.996259 | 16 |
| 5984_at | YDR470C SGO1   | 3.097691 | 3.200906 | 2.547551  | 3.240534 | 3.327873 | 3.145766  | 3.349578 | 3.253958 | 3.387378 | 3.297684 | 3.011761 | 3.299163 | 3.003632 | 3.003924 | 2.869445 | 3.239471 | -0.0176  | -0.0739 | 0.103    | 0.012347 | 1.212394 | 13 |
| 5985_at | YDR471W RPL27B | 11.16302 | 11.21204 | 11.511305 | 10.7     |          |           |          |          |          |          |          |          |          |          |          |          |          |         |          |          |          |    |



|           |                |          |          |          |          |          |          |          |          |          |          |          |          |          |          |          |          |         |          |          |          |          |    |
|-----------|----------------|----------|----------|----------|----------|----------|----------|----------|----------|----------|----------|----------|----------|----------|----------|----------|----------|---------|----------|----------|----------|----------|----|
| 6017_at   | YDR458C HEH2   | 3.813676 | 4.326531 | 4.191615 | 4.292114 | 4.104806 | 4.047921 | 4.862135 | 4.538365 | 4.044941 | 4.417895 | 4.126623 | 4.631459 | 3.505853 | 3.857782 | 3.526036 | 4.379276 | -0.103  | -0.144   | 0.00748  | 0.001209 | 1.663232 | 12 |
| 6018_at   | YDR459C PFA5   | 6.288513 | 6.234716 | 6.295358 | 6.283652 | 6.30064  | 5.943953 | 6.416721 | 6.517003 | 6.063041 | 6.800343 | 6.602211 | 6.699668 | 6.410135 | 6.470475 | 6.350802 | 6.460777 | 0.0766  | -0.0378  | 0.159    | 0.018242 | 1.239522 | 13 |
| 6019_at   | YDR460W TFB3   | 6.832776 | 7.053848 | 7.195744 | 7.169725 | 7.064129 | 6.768843 | 7.281583 | 7.259829 | 6.511209 | 7.569425 | 7.152585 | 7.3241   | 7.096596 | 6.938992 | 7.073952 | 7.169096 | 0.0353  | -0.041   | 0.552    | 0.055539 | 1.168683 | 13 |
| 6020_r_at | YDR461W MFA1   | 5.38619  | 4.976683 | 5.54418  | 5.88789  | 5.614668 | 5.363773 | 5.610075 | 5.437127 | 5.147239 | 5.57141  | 5.409908 | 5.856634 | 6.147451 | 5.797191 | 6.47688  | 5.588908 | 0.2     | 0.0404   | 0.00773  | 0.001243 | 1.698523 | 13 |
| 6020_f_at | YDR461W MFA1   | 5.515871 | 5.352945 | 5.81673  | 6.258041 | 6.340639 | 5.61623  | 7.080676 | 7.199292 | 6.809344 | 6.348293 | 8.310142 | 7.081739 | 9.465159 | 9.520156 | 9.697697 | 7.638709 | 1.08    | -0.0275  | 7.40E-11 | 3.25E-09 | 17.68837 | 4  |
| 6022_at   | YDR462W MRPL28 | 6.281929 | 6.633557 | 6.911287 | 7.206136 | 7.169587 | 7.240661 | 7.104816 | 7.155158 | 6.873789 | 7.007074 | 7.077117 | 8.185789 | 7.128099 | 6.789358 | 7.10222  | 7.164668 | 0.0817  | -0.0941  | 0.0213   | 0.003203 | 1.431799 | 13 |
| 6023_at   | YDR463W STP1   | 7.31882  | 7.220744 | 7.268923 | 7.512772 | 7.459051 | 7.179295 | 8.24249  | 8.103995 | 7.945098 | 8.774259 | 8.56107  | 8.541058 | 8.892902 | 8.32205  | 8.966797 | 8.252589 | 0.433   | -0.0792  | 5.14E-05 | 1.77E-05 | 3.154453 | 7  |
| 6024_at   | YDR464W SPP41  | 5.462053 | 5.456558 | 5.928064 | 5.625341 | 5.311306 | 5.526275 | 5.678981 | 5.937873 | 5.536756 | 6.200192 | 6.103173 | 6.152945 | 7.165386 | 6.494007 | 6.569732 | 5.878292 | 0.322   | 0.0781   | 4.64E-05 | 1.62E-05 | 2.348197 | 8  |
| 6025_at   | YDR465C RMT2   | 8.070661 | 8.018917 | 7.693696 | 7.247785 | 7.581153 | 7.281096 | 7.599511 | 7.616807 | 7.013484 | 7.344699 | 6.718476 | 5.947041 | 5.801311 | 6.983484 | 5.087096 | 6.931663 | -0.676  | -0.0918  | 6.88E-06 | 3.56E-06 | 5.998428 | 18 |
| 6026_at   | YDR420W HKR1   | 5.340639 | 5.453082 | 4.998274 | 5.377572 | 5.343121 | 5.220561 | 5.672538 | 5.439172 | 5.508006 | 5.039881 | 5.239475 | 5.903537 | 5.574278 | 5.434238 | 5.707967 | 5.447762 | 0.0724  | -0.00872 | 0.351    | 0.036961 | 1.211694 | 13 |
| 6027_at   | YDR421W ARO80  | 3.606811 | 3.579114 | 3.380884 | 3.8593   | 3.769271 | 3.558374 | 4.272323 | 4.190121 | 3.724937 | 4.416598 | 4.042903 | 4.011533 | 3.472419 | 3.549803 | 3.435088 | 4.072075 | 0.162   | -0.16    | 0.0021   | 0.00404  | 1.511444 | 12 |
| 6028_at   | YDR422C SIP1   | 5.392221 | 5.564691 | 5.306902 | 5.655436 | 5.578131 | 5.479144 | 6.105732 | 5.691884 | 5.465046 | 5.719337 | 5.736834 | 5.940488 | 5.440943 | 5.600113 | 5.663519 | 5.765826 | -0.0476 | -0.0761  | 0.0376   | 0.005035 | 1.29793  | 13 |
| 6029_at   | YDR423C CAD1   | 5.793144 | 5.862695 | 5.5175   | 5.998916 | 5.926893 | 5.780986 | 5.815861 | 5.798946 | 5.581509 | 5.505356 | 5.594569 | 5.532428 | 5.665502 | 5.632547 | 5.769364 | 5.698852 | -0.0381 | 0.00648  | 0.498    | 0.050639 | 1.106373 | 13 |
| 6030_at   | YDR424C DYN2   | 9.28936  | 9.409764 | 9.779547 | 9.304938 | 9.364884 | 9.529754 | 9.861459 | 9.839129 | 8.670869 | 8.244043 | 8.252698 | 8.458418 | 7.618209 | 7.960892 | 8.020053 | 8.666873 | -0.465  | 0.0107   | 3.02E-06 | 1.92E-06 | 3.426962 | 16 |
| 6031_at   | YDR425W SNX41  | 4.850214 | 5.012674 | 5.353296 | 5.052201 | 5.309452 | 4.675576 | 5.616638 | 5.466866 | 5.076076 | 5.377172 | 5.096894 | 5.461602 | 4.928001 | 4.670586 | 5.023587 | 5.27713  | -0.0307 | -0.088   | 0.136    | 0.005864 | 1.290651 | 13 |
| 6032_at   | YDR426C        | 3.27596  | 3.130993 | 3.277565 | 3.021388 | 3.03699  | 3.023942 | 3.455836 | 3.305188 | 2.93623  | 3.024192 | 3.052058 | 3.250307 | 3.142586 | 3.111284 | 3.339568 | 3.09627  | -0.015  | 0.062    | 0.22     | 0.024382 | 1.190069 | 13 |
| 6033_at   | YDR427W RPN9   | 8.767115 | 8.773334 | 8.57028  | 8.369712 | 8.405263 | 8.193175 | 8.400262 | 8.403159 | 8.369409 | 8.232949 | 8.211456 | 8.442266 | 7.74844  | 7.663649 | 7.673229 | 8.289101 | -0.243  | -0.0274  | 4.38E-06 | 2.54E-06 | 1.902234 | 16 |
| 6034_at   | YDR428C        | 6.328316 | 6.663736 | 6.926046 | 6.418276 | 6.143159 | 6.218355 | 5.782131 | 5.555464 | 5.621888 | 5.264693 | 4.981469 | 5.085462 | 5.869723 | 5.307531 | 5.340788 | 5.446167 | -0.347  | 0.18     | 0.000101 | 3.10E-05 | 2.702253 | 14 |
| 6035_at   | YDR429C TIF35  | 11.19158 | 11.10742 | 10.81681 | 10.35123 | 10.60559 | 10.1756  | 10.31287 | 10.34205 | 10.01214 | 10.2717  | 9.21242  | 9.104418 | 9.310479 | 8.585649 | 9.099363 | 9.958265 | -0.516  | 0.0145   | 2.99E-06 | 1.91E-06 | 3.931447 | 18 |
| 6036_at   | YDR430C CYM1   | 5.042091 | 5.353173 | 5.593782 | 5.705114 | 5.731139 | 5.69397  | 5.977163 | 5.717665 | 5.36787  | 5.992536 | 5.670179 | 6.14376  | 6.204355 | 5.494162 | 5.514071 | 5.851281 | 0.0339  | -0.132   | 0.015    | 0.002214 | 1.454777 | 12 |
| 6037_at   | YDR431W        | 3.077047 | 3.040305 | 4.157679 | 2.970221 | 3.299719 | 2.945096 | 2.947636 | 2.905957 | 2.846321 | 2.877555 | 3.007568 | 2.786129 | 2.954899 | 2.906656 | 3.171312 | 2.87009  | -0.1    | 0.0952   | 0.0778   | 0.009613 | 1.479718 | 13 |
| 6038_at   | YDR432W NPL3   | 9.832471 | 9.624178 | 8.682448 | 8.85082  | 8.455608 | 8.33599  | 8.853888 | 9.136205 | 8.695532 | 9.331124 | 9.429204 | 8.780129 | 10.12676 | 9.385881 | 9.596547 | 8.865303 | 0.136   | 0.176    | 0.0253   | 0.003523 | 1.89698  | 8  |
| 6039_g_at | YDR432W NPL3   | 11.10272 | 11.16097 | 10.51005 | 10.36079 | 10.40729 | 10.3198  | 10.46671 | 10.4394  | 10.42202 | 11.28477 | 10.94105 | 10.434   | 11.31669 | 11.63471 | 11.39449 | 10.57428 | 0.176   | 0.163    | 0.00132  | 0.002071 | 1.970953 | 8  |
| 6040_i_at | YDR433W        | 11.37794 | 11.73117 | 12.01416 | 10.99589 | 11.06561 | 11.15295 | 10.90915 | 10.82207 | 10.97867 | 11.75488 | 11.4919  | 11.14617 | 11.86818 | 12.35415 | 12.18688 | 11.11264 | 0.152   | 0.218    | 0.000301 | 7.62E-05 | 2.146422 | 8  |
| 6041_at   | YDR434W GPI17  | 7.330484 | 7.424705 | 7.343295 | 7.614112 | 6.97627  | 7.007217 | 6.686659 | 6.455418 | 6.659429 | 6.243778 | 6.077995 | 6.139051 | 6.086691 | 6.417363 | 6.107839 | 6.317594 | -0.326  | 0.117    | 3.28E-07 | 3.77E-07 | 2.373103 | 14 |
| 6042_at   | YDR435C PPM1   | 6.169274 | 6.050338 | 5.728778 | 6.327304 | 6.249044 | 6.042986 | 6.366364 | 6.13921  | 6.49094  | 6.332844 | 6.437291 | 6.918378 | 5.188143 | 5.733578 | 5.70625  | 6.432944 | -0.0797 | -0.188   | 0.001059 | 0.000316 | 1.756505 | 12 |
| 6043_at   | YDR436W PPZ2   | 5.89505  | 5.976115 | 5.408509 | 6.119279 | 6.136678 | 6.198403 | 6.59427  | 6.448722 | 6.463433 | 6.883608 | 6.907441 | 6.628654 | 6.168061 | 6.54448  | 6.213997 | 6.673078 | 0.172   | -0.17    | 0.000174 | 4.83E-05 | 1.98279  | 9  |
| 6044_at   | YDR437W GPI19  | 5.439018 | 4.925352 | 4.6785   | 4.783644 | 4.794408 | 4.974845 | 4.618162 | 5.130128 | 5.152032 | 4.805894 | 5.093627 | 4.6893   | 4.577719 | 4.819571 | 4.729062 | 4.869571 | -0.0713 | -0.00427 | 0.343    | 0.036169 | 1.208011 | 13 |
| 6045_at   | YDR438W TH14   | 5.490418 | 5.773881 | 5.128871 | 6.132377 | 5.718565 | 6.151465 | 6.276985 | 6.352174 | 6.32804  | 6.475789 | 6.636472 | 7.246439 | 6.181456 | 6.553352 | 7.150225 | 6.562363 | 0.328   | -0.145   | 0.000476 | 0.000113 | 2.407343 | 9  |
| 6046_at   | YDR439W LRS4   | 5.025826 | 5.066772 | 4.602172 | 4.829646 | 4.652762 | 4.788884 | 4.647081 | 4.964171 | 4.879524 | 4.75781  | 5.153146 | 5.17664  | 4.941936 | 5.154495 | 4.972723 | 4.889411 | 0.0387  | 0.00939  | 0.595    | 0.059517 | 1.108091 | 13 |
| 6047_at   | YDR440W DOT1   | 5.366997 | 5.71797  | 5.476012 | 5.349622 | 5.306611 | 5.475897 | 5.199    | 5.385808 | 5.265343 | 5.485498 | 5.227439 | 5.076923 | 4.538359 | 5.385283 | 4.667461 | 5.260128 | -0.161  | -0.0196  | 0.0121   | 0.00184  | 1.532783 | 16 |
| 6048_at   | YDR441C APT2   | 4.963658 | 4.607652 | 4.61267  | 5.246292 | 5.041758 | 5.874597 | 5.434132 | 5.510085 | 5.365647 | 5.59235  | 5.613038 | 6.39489  | 4.818374 | 5.437988 | 5.369756 | 5.698572 | 0.142   | -0.201   | 0.00445  | 0.000771 | 2.024661 | 9  |
| 6049_at   | YDR398W UTP5   | 8.364232 | 8.756865 | 8.70931  | 7.823454 | 7.912574 | 7.914219 | 7.87119  | 7.863619 | 7.679357 | 7.593524 | 7.278556 | 7.030075 | 6.347158 | 6.050943 | 6.346788 | 7.456642 | -0.599  | -0.0104  | 6.35E-09 | 2.93E-08 | 4.887459 | 18 |
| 6050_at   | YDR399W HPT1   | 8.822452 | 8.942049 | 9.369647 | 9.069699 | 9.876855 | 8.911043 | 8.374494 | 8.481316 | 8.672741 | 8.115924 | 8.064392 | 8.501099 | 8.423411 | 8.024548 | 8.95727  | 8.447089 | -0.189  | 0.0916   | 0.0174   | 0.002536 | 1.629095 | 16 |
| 6051_at   | YDR400W URH1   | 7.658598 | 7.528458 | 7.27773  | 7.617195 | 7.528879 | 7.700482 | 7.445802 | 7.501246 | 7.75516  | 7.391894 | 7.651345 | 7.513916 | 7.470815 | 7.419879 | 7.861872 | 7.517776 | 0.0135  | -0.00804 | 0.887    | 0.085282 | 1.042107 | 13 |
| 6052_at   | YDR402C DIT2   | 4.367079 | 4.47165  | 4.03162  | 4.340911 | 4.239362 | 4.562152 | 4.341798 | 4.523187 | 4.488314 | 4.589468 | 4.39092  | 4.279285 | 4.396512 | 4.623495 | 4.570172 | 4.440896 | 0.0568  | -0.00814 | 0.206    | 0.022903 | 1.162405 | 13 |
| 6053_at   | YDR401W        | 5.3454   | 4.972902 | 4.569562 | 5.217322 | 5.084639 | 5.364082 | 4.889449 | 5.049615 | 5.25101  | 5.016936 | 5.306729 | 4.742718 | 5.594781 | 5.450409 | 5.59624  | 5.118265 | 0.15    | 0.0589   | 0.028    | 0.003868 | 1.5048   | 13 |
| 6054_at   | YDR403W DIT1   | 3.802479 | 3.644375 | 3.06628  | 3.802134 | 3.595608 | 3.932447 | 4.029933 | 4.022562 | 4.124591 | 4.059527 | 3.948956 | 3.966172 | 4.143719 | 4.093454 | 4.501171 | 4.050251 | 0.197   | -0.057   | 0.00131  | 0.000269 | 1.686178 | 9  |
| 6055_at   | YDR404C RPB2   | 8.249173 | 8.454987 | 8.387627 | 8.005982 | 8.154509 | 8.193174 | 8.784019 | 7.918169 | 7.884376 | 7.859506 | 7.725544 | 8.065309 | 7.703092 | 7.67024  | 8.461598 | 7.888617 | -0.109  | 0.0739   | 0.0249   | 0.003476 | 1.425905 | 16 |
| 6056_at   | YDR405W MRP20  | 6.271971 | 6.678859 | 6.154057 | 6.796394 | 7.016603 | 7.110367 | 7.384493 | 7.136828 | 6.997782 | 7.794677 | 7.096443 | 7.687983 | 7.183184 | 7.318114 | 7.630719 | 7.391743 | 0.273   | -0.143   | 0.000114 | 3.39E-05 | 2.194682 | 12 |
| 6057_at   | YDR406W PDR15  | 6.07775  | 5.989017 | 5.00493  | 6.053956 | 7.06884  | 7.254615 | 6.515775 | 6.272553 | 6.026847 | 6.476936 | 6.838881 | 9.32345  | 10.37739 | 9.104418 | 10.27267 | 8.85238  | 1.074   | -0.29    | 3.26E-06 | 2.04E-06 | 15.85175 | 4  |
| 6058_at   | YDR407C TRS120 | 6.024268 | 6.280723 |          |          |          |          |          |          |          |          |          |          |          |          |          |          |         |          |          |          |          |    |

|           |                |          |          |          |          |          |          |          |          |          |          |          |          |          |          |           |          |          |          |          |          |          |    |
|-----------|----------------|----------|----------|----------|----------|----------|----------|----------|----------|----------|----------|----------|----------|----------|----------|-----------|----------|----------|----------|----------|----------|----------|----|
| 6089_at   | YDR392W SPT3   | 5.521935 | 5.572261 | 5.746183 | 5.609556 | 5.502508 | 5.450864 | 5.939243 | 5.898577 | 5.313839 | 5.964428 | 5.522076 | 5.177986 | 5.7422   | 5.141261 | 5.611306  | 5.667476 | -0.0103  | -0.0343  | 0.672    | 0.066463 | 1.101272 | 13 |
| 6090_at   | YDR393W SHE9   | 5.127864 | 4.890187 | 5.054088 | 5.079947 | 5.220567 | 5.462056 | 5.159539 | 5.113302 | 4.651534 | 4.792078 | 4.284591 | 4.511256 | 4.305313 | 4.078917 | 4.150196  | 4.746783 | -0.238   | -0.0386  | 0.00072  | 0.00016  | 1.88136  | 16 |
| 6091_at   | YDR394W RPT3   | 7.568624 | 7.468199 | 7.568685 | 7.442339 | 8.070490 | 7.295385 | 8.020589 | 7.52351  | 7.346259 | 8.20526  | 7.546751 | 7.742938 | 7.711665 | 7.196777 | 7.61002   | 7.676699 | 0.00264  | -0.0437  | 0.687    | 0.067728 | 1.11608  | 13 |
| 6092_at   | YDR395W SXM1   | 7.210391 | 7.631889 | 7.222664 | 6.813441 | 6.954042 | 7.015119 | 6.776018 | 6.573263 | 6.604356 | 6.334707 | 6.697166 | 7.632652 | 6.511172 | 6.788518 | 6.6521263 |          | -0.118   | 0.185    | 0.00337  | 0.000604 | 1.891085 | 14 |
| 6093_at   | YDR396W        | 5.587695 | 5.864809 | 5.612233 | 4.900533 | 5.297762 | 5.007449 | 4.165198 | 5.297738 | 5.292499 | 4.91091  | 5.148031 | 4.525238 | 4.742688 | 4.430279 | 4.558194  | 4.956692 | -0.281   | 0.0451   | 0.000103 | 3.14E-05 | 2.103836 | 16 |
| 6094_at   | YDR397C NCB2   | 6.729417 | 7.080698 | 7.506984 | 7.305083 | 7.356578 | 6.261849 | 7.018465 | 7.046242 | 6.880594 | 6.900857 | 6.684623 | 6.062041 | 5.4013   | 6.225089 | 6.705964  | 6.999339 | -0.175   | -0.0516  | 0.00444  | 0.00077  | 1.588915 | 16 |
| 6095_at   | YDR354W TRP4   | 7.278358 | 7.603875 | 7.49354  | 6.649641 | 6.850375 | 6.351602 | 6.263224 | 6.114385 | 6.046917 | 6.070025 | 5.887747 | 5.779963 | 5.963536 | 5.939001 | 5.600195  | 5.985254 | -0.42    | 0.182    | 2.28E-07 | 2.94E-07 | 3.056543 | 14 |
| 6096_at   | YDR355C        | 4.289828 | 4.370376 | 4.068044 | 4.365966 | 4.525491 | 4.177515 | 4.511812 | 4.217808 | 4.187071 | 4.297611 | 4.034561 | 3.970822 | 4.174665 | 4.295703 | 3.885042  | 4.234516 | -0.0527  | -0.0122  | 0.333    | 0.035247 | 1.1499   | 13 |
| 6097_at   | YDR356W SPC110 | 4.232812 | 4.613441 | 4.154818 | 4.161516 | 4.788233 | 3.913894 | 4.547019 | 4.253694 | 3.903019 | 4.659345 | 4.040068 | 4.003949 | 4.822169 | 4.124413 | 4.017597  | 4.23781  | -0.00533 | 0.0251   | 0.904    | 0.086718 | 1.071651 | 13 |
| 6098_at   | YDR357C        | 6.294315 | 6.222507 | 6.512369 | 6.372566 | 7.12701  | 6.464087 | 7.426271 | 6.584002 | 6.453665 | 7.404786 | 6.726448 | 6.881705 | 6.33689  | 6.494996 | 6.404768  | 6.914442 | 0.0378   | -0.15    | 0.0474   | 0.006175 | 1.525707 | 12 |
| 6099_at   | YDR358W GGA1   | 6.447132 | 6.552501 | 6.328288 | 7.100277 | 7.125557 | 6.577336 | 7.581024 | 7.415686 | 7.264621 | 7.012755 | 6.916463 | 7.078387 | 6.44383  | 6.372125 | 6.34784   | 7.209411 | -0.0299  | -0.218   | 0.000255 | 6.66E-05 | 1.749385 | 12 |
| 6100_at   | YDR359C EAF1   | 6.272761 | 6.109535 | 5.589821 | 6.492528 | 6.238441 | 6.05578  | 6.461702 | 6.401719 | 6.129799 | 6.155555 | 6.550732 | 6.138294 | 6.63128  | 6.607507 | 6.695597  | 6.343433 | 0.15     | -0.00491 | 0.0193   | 0.00278  | 1.489719 | 13 |
| 6101_at   | YDR360W OPI7   | 2.958646 | 2.951632 | 3.546297 | 3.129191 | 3.025301 | 2.880362 | 3.172935 | 3.147179 | 2.889764 | 2.831569 | 2.970137 | 2.858255 | 2.842206 | 2.901106 | 2.970065  | 2.955543 | -0.0696  | 0.0198   | 0.155    | 0.001779 | 1.202653 | 13 |
| 6102_at   | YDR361C BCP1   | 6.891241 | 6.262013 | 6.854391 | 5.995556 | 6.243906 | 5.472972 | 6.137282 | 6.315656 | 5.756157 | 6.112083 | 5.765496 | 5.692018 | 5.223415 | 4.865923 | 5.057575  | 5.801947 | -0.408   | 0.0245   | 0.000094 | 2.91E-05 | 2.948874 | 16 |
| 6103_at   | YDR362C TFC6   | 6.1049   | 5.933604 | 5.916856 | 5.98103  | 5.971854 | 5.353117 | 6.304997 | 6.394787 | 5.922305 | 6.867013 | 6.427956 | 6.669632 | 7.112003 | 6.020466 | 6.460459  | 6.315374 | 0.199    | -0.0245  | 0.067    | 0.008434 | 1.694598 | 9  |
| 6104_at   | YDR363W ESC2   | 4.919823 | 4.709348 | 4.796292 | 4.500031 | 4.647081 | 4.534973 | 5.171134 | 5.039549 | 5.055892 | 4.917166 | 4.789322 | 4.789828 | 4.005308 | 3.567744 | 4.438656  | 4.836151 | -0.179   | -0.125   | 0.00291  | 0.00053  | 1.616539 | 16 |
| 6105_at   | YDR363W SEM1   | 6.862305 | 7.219499 | 8.273771 | 7.242756 | 7.138992 | 7.087382 | 6.919948 | 6.619045 | 6.763697 | 6.84917  | 6.860281 | 6.682324 | 6.151556 | 5.834567 | 6.29903   | 6.786727 | -0.338   | -0.00337 | 0.00158  | 0.000316 | 2.446663 | 16 |
| 6106_at   | YDR364C CDC40  | 6.290027 | 6.245351 | 6.160749 | 6.008541 | 6.20075  | 5.814042 | 6.401578 | 6.433236 | 6.41872  | 6.419309 | 6.293714 | 5.965651 | 5.370702 | 4.805043 | 4.828699  | 6.209401 | -0.281   | -0.17    | 6.61E-05 | 2.17E-05 | 2.41804  | 15 |
| 6107_at   | YDR365C ESF1   | 6.025382 | 6.382124 | 6.857759 | 5.488173 | 5.886884 | 5.171455 | 5.562173 | 5.400018 | 5.076393 | 5.786644 | 4.815351 | 4.40859  | 4.987012 | 4.800196 | 4.317339  | 5.040336 | -0.506   | 0.0928   | 0.00042  | 0.000102 | 3.821752 | 18 |
| 6108_at   | YDR366C        | 4.942983 | 5.142491 | 5.913634 | 5.286976 | 5.384139 | 5.280592 | 5.161988 | 5.329882 | 5.337175 | 5.357366 | 5.640044 | 5.5119   | 6.259942 | 5.762852 | 5.955119  | 5.396467 | 0.175    | 0.0731   | 0.000467 | 0.000804 | 1.624688 | 13 |
| 6109_at   | YDR367W        | 6.680622 | 6.849613 | 7.453142 | 6.341066 | 6.250774 | 6.573597 | 7.09221  | 5.808607 | 6.238598 | 5.403168 | 5.575846 | 6.259162 | 5.909391 | 5.37356  | 5.819246  | 5.815912 | -0.365   | 0.134    | 0.000171 | 4.75E-05 | 2.631069 | 14 |
| 6110_at   | YDR368W YPR1   | 9.256655 | 9.415699 | 9.589098 | 9.212484 | 9.304038 | 9.458996 | 9.132531 | 8.79659  | 9.218507 | 8.27488  | 8.385686 | 8.705512 | 6.72517  | 7.528867 | 7.699981  | 8.778618 | -0.567   | -0.109   | 5.73E-07 | 5.65E-07 | 4.92235  | 18 |
| 6111_at   | YDR369C XRS2   | 5.020005 | 5.146938 | 4.742863 | 5.087743 | 5.400277 | 4.939625 | 5.603338 | 5.210979 | 5.294243 | 5.531569 | 5.108344 | 4.986804 | 4.731919 | 4.942539 | 4.690406  | 5.271073 | -0.0466  | -0.109   | 0.014    | 0.002089 | 1.390795 | 12 |
| 6112_at   | YDR370C        | 5.274394 | 5.592296 | 4.96401  | 5.409135 | 5.402157 | 5.167029 | 5.319769 | 5.098969 | 5.302326 | 5.215069 | 4.783189 | 5.314023 | 3.993712 | 4.325406 | 4.165928  | 5.175176 | -0.281   | -0.125   | 1.67E-05 | 7.06E-06 | 2.217183 | 15 |
| 6113_at   | YDR371W CTS2   | 3.295502 | 3.290416 | 2.877572 | 3.299395 | 3.271307 | 3.140755 | 3.313702 | 3.408858 | 3.436993 | 3.24933  | 3.359524 | 3.376788 | 2.753935 | 3.198474 | 2.921064  | 3.3412   | -0.0444  | -0.0797  | 0.0108   | 0.001663 | 1.296482 | 14 |
| 6114_at   | YDR372C VPS74  | 6.93657  | 7.262954 | 6.40546  | 6.468631 | 6.614042 | 6.649748 | 6.694055 | 6.517443 | 6.49449  | 6.618197 | 6.491834 | 6.465752 | 6.074021 | 6.630763 | 6.196508  | 6.499401 | -0.181   | -0.00621 | 0.00208  | 0.000525 | 1.61687  | 16 |
| 6115_at   | YDR373W FRQ1   | 7.789705 | 7.749215 | 8.149811 | 7.456672 | 7.250977 | 7.562827 | 7.086015 | 7.196752 | 7.120274 | 7.406236 | 7.503241 | 7.430318 | 7.708358 | 7.705891 | 7.502184  | 7.260338 | -0.0424  | 0.138    | 0.00239  | 0.000449 | 1.931919 | 13 |
| 6116_at   | YDR374C        | 3.558177 | 3.532297 | 3.222019 | 3.475077 | 3.540448 | 3.78502  | 3.728367 | 4.019774 | 3.753331 | 3.748029 | 3.943543 | 3.950356 | 4.032555 | 4.412557 | 4.112279  | 3.849074 | -0.012   | -0.012   | 0.000332 | 8.29E-05 | 1.667075 | 13 |
| 6117_at   | YDR331W GP3    | 6.745313 | 6.524185 | 6.41572  | 6.538414 | 6.319643 | 6.374634 | 5.952283 | 5.754856 | 5.713018 | 5.670607 | 5.981393 | 6.092489 | 6.708817 | 6.310895 | 6.243064  | 5.938216 | -0.0567  | 0.157    | 0.00704  | 0.001149 | 1.602573 | 13 |
| 6118_at   | YDR332W IRC8   | 4.76974  | 5.098592 | 5.707847 | 4.71566  | 4.736362 | 4.634843 | 4.799514 | 4.817133 | 4.601444 | 4.773635 | 4.903893 | 4.950161 | 4.476671 | 4.672111 | 4.610333  | 4.718922 | -0.104   | 0.0535   | 0.0897   | 0.010927 | 1.345483 | 13 |
| 6119_at   | YDR333C        | 7.106071 | 7.05005  | 6.615633 | 6.491266 | 6.788812 | 6.349835 | 6.970386 | 6.690546 | 6.817208 | 7.12888  | 7.064272 | 6.776786 | 7.14229  | 6.743746 | 6.957496  | 6.803577 | 0.0431   | 0.03     | 0.504    | 0.051163 | 1.15445  | 13 |
| 6120_at   | YDR334W SWR1   | 4.560506 | 4.805815 | 5.769706 | 4.803625 | 4.710885 | 4.65018  | 4.089232 | 4.623064 | 4.284874 | 4.351367 | 4.58487  | 4.503304 | 5.146609 | 4.982034 | 5.073631  | 4.425881 | 0.000788 | 0.175    | 0.0156   | 0.002292 | 1.529026 | 13 |
| 6121_at   | YDR335W MSN5   | 7.496276 | 7.859702 | 7.959808 | 7.743581 | 7.68527  | 8.126375 | 7.872386 | 7.962526 | 8.025737 | 8.336227 | 8.429672 | 8.830585 | 8.863575 | 8.706398 | 9.022844  | 8.226759 | 0.316    | 0.0216   | 4.81E-05 | 1.67E-05 | 2.311217 | 7  |
| 6122_at   | YDR336W        | 7.732308 | 7.292369 | 6.864699 | 7.79292  | 7.992642 | 8.128951 | 7.939096 | 8.139714 | 7.940194 | 8.039608 | 8.178666 | 8.860448 | 8.079489 | 8.386222 | 8.402333  | 8.112124 | 0.229    | -0.0833  | 0.00148  | 0.000298 | 1.832994 | 9  |
| 6123_at   | YDR337W MRPS28 | 7.56036  | 7.680675 | 6.839414 | 8.041741 | 8.428268 | 8.254471 | 8.475324 | 8.196922 | 8.171852 | 7.895338 | 7.532998 | 7.741973 | 6.799845 | 6.837174 | 6.590123  | 8.122433 | -0.208   | -0.288   | 4.21E-05 | 1.50E-05 | 2.775757 | 15 |
| 6124_at   | YDR338C        | 5.925257 | 6.257555 | 5.449027 | 6.416942 | 6.315774 | 6.455789 | 6.842726 | 6.669102 | 6.933983 | 6.644892 | 6.980462 | 6.82958  | 6.692445 | 6.792614 | 6.814155  | 6.814155 | 0.258    | -0.121   | 6.53E-05 | 2.15E-05 | 2.032103 | 9  |
| 6125_at   | YDR339C FCF1   | 7.742236 | 7.843789 | 8.264815 | 7.762809 | 7.711255 | 7.833866 | 7.529151 | 7.791391 | 7.340704 | 7.839824 | 7.608953 | 7.473566 | 6.551202 | 7.214706 | 7.742572  | 7.585915 | -0.266   | -0.0543  | 0.000441 | 0.000106 | 2.024693 | 16 |
| 6126_at   | YDR340W        | 2.988352 | 2.933664 | 2.672399 | 2.602658 | 2.700657 | 2.890453 | 2.723533 | 2.757755 | 2.799435 | 2.734369 | 2.736023 | 2.642598 | 2.73004  | 2.987192 | 2.808728  | 2.731225 | -0.00663 | 0.0381   | 0.153    | 0.017568 | 1.108179 | 13 |
| 6127_at   | YDR341C        | 11.03044 | 11.04001 | 10.84035 | 10.30048 | 10.51074 | 10.243   | 10.27427 | 10.1239  | 9.898914 | 9.950608 | 9.764984 | 9.62878  | 10.6808  | 10.13692 | 10.57179  | 9.912625 | -0.154   | 0.223    | 1.86E-05 | 7.69E-06 | 2.196071 | 14 |
| 6128_f_at | YDR342C HXT7   | 10.36954 | 10.04455 | 8.708738 | 10.52135 | 10.40134 | 10.31992 | 11.17709 | 11.34272 | 11.27974 | 11.69696 | 11.49033 | 11.66402 | 12.11896 | 12.13741 | 12.15807  | 11.41089 | 0.647    | -0.139   | 1.98E-05 | 8.10E-06 | 5.55403  | 4  |
| 6129_f_at | YDR343C HXT6   | 10.00405 | 9.712405 | 8.390654 | 10.50574 | 10.39552 | 10.56613 | 11.41705 | 11.71849 | 11.51942 | 12.03135 | 11.71912 | 11.94119 | 12.70918 | 12.62302 | 12.69031  | 11.7162  | 0.859    | -0.197   | 1.92E-06 | 1.37E-06 | 9.761162 | 4  |
| 6130_at   | YDR344C        | 3.87066  | 3.684451 |          |          |          |          |          |          |          |          |          |          |          |          |           |          |          |          |          |          |          |    |

|           |         |        |          |          |          |          |          |          |          |          |          |          |          |          |          |          |          |          |         |         |          |          |          |    |
|-----------|---------|--------|----------|----------|----------|----------|----------|----------|----------|----------|----------|----------|----------|----------|----------|----------|----------|----------|---------|---------|----------|----------|----------|----|
| 6161_at   | YDR329C | PEX3   | 6.488376 | 6.513045 | 6.758032 | 6.141821 | 6.429582 | 6.114738 | 6.738683 | 6.575914 | 6.330837 | 7.091357 | 6.831128 | 6.611608 | 7.315282 | 6.946951 | 7.132659 | 6.591771 | 0.18    | 0.0668  | 0.00073  | 0.00066  | 1.6224   | 13 |
| 6162_at   | YDR330W | UBX5   | 6.093686 | 6.196797 | 6.311882 | 6.535999 | 6.490898 | 6.102618 | 6.805319 | 6.710776 | 6.593013 | 6.855325 | 6.895185 | 7.267334 | 6.29212  | 6.977321 | 6.421711 | 6.794614 | 0.0532  | -0.165  | 0.00533  | 0.0009   | 1.624712 | 12 |
| 6163_at   | YDR289C | RTT103 | 4.874307 | 4.98015  | 4.82333  | 4.839238 | 5.018812 | 4.357464 | 4.866526 | 4.915063 | 4.437395 | 5.475524 | 4.718853 | 4.752382 | 5.33166  | 5.13911  | 5.020706 | 4.834117 | 0.0887  | 0.0512  | 0.146    | 0.016884 | 1.314943 | 13 |
| 6164_at   | YDR290W |        | 3.103335 | 3.055916 | 2.820705 | 3.189675 | 3.205295 | 2.973419 | 3.145516 | 3.082712 | 3.071982 | 3.107293 | 3.091704 | 3.026755 | 2.997778 | 3.049728 | 3.022586 | 3.119294 | 0.00346 | -0.0296 | 0.181    | 0.020407 | 1.080139 | 13 |
| 6165_at   | YDR291W | HRP1   | 7.372681 | 7.418434 | 6.798169 | 7.3159   | 7.404273 | 6.495028 | 7.721138 | 7.622987 | 7.053609 | 7.766339 | 7.670930 | 7.348469 | 7.218143 | 7.263894 | 6.92585  | 7.438948 | 0.0225  | -0.0814 | 0.4      | 0.041635 | 1.262265 | 13 |
| 6166_at   | YDR292C | SRP101 | 7.06498  | 7.139421 | 6.589705 | 6.583507 | 6.622765 | 6.890312 | 6.24038  | 6.152301 | 6.576992 | 6.118953 | 6.385332 | 5.763097 | 6.739995 | 6.405074 | 5.933177 | 5.862268 | -0.199  | 0.201   | 0.00416  | 0.000725 | 2.242049 | 14 |
| 6167_at   | YDR293C | SSD1   | 7.738711 | 7.687078 | 6.93565  | 8.17735  | 8.127684 | 7.850804 | 9.336336 | 8.912454 | 8.819944 | 9.615831 | 9.252666 | 9.830579 | 9.910295 | 9.553443 | 10.12119 | 9.219138 | 0.667   | -0.163  | 5.1E-06  | 2.85E-06 | 5.8672   | 4  |
| 6168_at   | YDR294C | DPL1   | 8.65048  | 8.55947  | 8.55448  | 9.123623 | 8.834432 | 8.888148 | 9.477359 | 9.493326 | 9.034067 | 9.773794 | 9.546703 | 9.83882  | 7.832918 | 8.448868 | 7.866958 | 9.454925 | -0.071  | -0.321  | 0.00028  | 7.18E-05 | 2.359828 | 12 |
| 6169_at   | YDR295C | HDA2   | 2.895894 | 2.996317 | 3.296717 | 3.270113 | 3.375041 | 2.953062 | 3.290264 | 3.156338 | 2.798489 | 3.192824 | 2.906671 | 2.899578 | 2.832668 | 2.773139 | 2.786411 | 3.076296 | -0.0796 | -0.038  | 0.0644   | 0.008139 | 1.258975 | 13 |
| 6170_at   | YDR296W | MHR1   | 7.67782  | 8.019564 | 8.013476 | 8.622051 | 8.520089 | 8.512708 | 8.759394 | 8.985942 | 8.443275 | 8.461461 | 8.151551 | 8.295911 | 7.434837 | 6.986717 | 7.145336 | 8.574607 | -0.208  | -0.28   | 1.19E-06 | 9.63E-07 | 2.723209 | 15 |
| 6171_at   | YDR297W | SUR2   | 8.84106  | 8.923049 | 8.159981 | 8.113028 | 8.221881 | 8.394683 | 8.606726 | 8.448936 | 8.752829 | 8.668224 | 8.778463 | 8.916843 | 9.648265 | 9.108948 | 9.886592 | 8.591429 | 0.259   | 0.133   | 0.000492 | 0.000117 | 2.153077 | 8  |
| 6172_at   | YDR298C | ATP5   | 6.649321 | 6.640364 | 6.649999 | 7.804348 | 7.818523 | 7.234931 | 8.030564 | 7.84437  | 7.890946 | 6.8517   | 6.80278  | 7.690601 | 5.312544 | 4.985223 | 5.619973 | 7.603474 | -0.388  | -0.443  | 9.58E-07 | 8.24E-07 | 5.409254 | 17 |
| 6173_at   | YDR299W | BFR2   | 5.389207 | 5.752787 | 6.392391 | 5.399743 | 5.284203 | 4.918224 | 5.465425 | 5.392476 | 5.106522 | 5.81364  | 5.023861 | 4.673283 | 3.834535 | 3.401574 | 3.728318 | 5.11038  | -0.516  | -0.107  | 0.000109 | 3.28E-05 | 3.922548 | 18 |
| 6174_at   | YDR300C | PRO1   | 7.803422 | 8.199773 | 8.046193 | 7.720558 | 7.66058  | 7.293957 | 7.640136 | 7.490642 | 7.100619 | 7.571978 | 7.166649 | 7.203783 | 6.973942 | 6.536392 | 6.97306  | 7.312946 | -0.292  | 0.0281  | 0.000157 | 4.42E-05 | 2.168269 | 16 |
| 6175_at   | YDR301W | CF11   | 5.014522 | 5.286464 | 5.970477 | 5.167285 | 5.183988 | 5.182109 | 5.362584 | 5.154474 | 5.123701 | 5.186982 | 5.230205 | 5.406324 | 5.340552 | 5.172723 | 5.267472 | 5.200885 | -0.0273 | 0.0364  | 0.551    | 0.055512 | 1.141183 | 13 |
| 6176_at   | YDR302W | GP111  | 8.576842 | 8.442395 | 8.753364 | 8.343002 | 8.336323 | 8.175266 | 8.184445 | 7.884253 | 7.811314 | 7.515832 | 7.507131 | 7.490577 | 7.545071 | 7.006824 | 6.920175 | 7.74657  | -0.395  | 0.0384  | 1.6E-06  | 1.21E-06 | 2.850722 | 16 |
| 6177_at   | YDR303C | RSC3   | 5.154162 | 5.506993 | 6.125552 | 5.106837 | 5.092553 | 5.212852 | 4.40005  | 5.692566 | 4.523768 | 4.695564 | 4.801066 | 4.759587 | 5.58903  | 5.098005 | 5.28296  | 4.657959 | -0.0902 | 0.212   | 0.00187  | 0.000364 | 1.932621 | 14 |
| 6178_at   | YDR304C | CPR5   | 9.935747 | 9.955303 | 10.37468 | 10.11807 | 10.11525 | 10.41391 | 9.928133 | 9.865429 | 10.07309 | 9.119634 | 9.139074 | 9.562923 | 7.947617 | 7.828811 | 8.126236 | 9.670234 | -0.582  | -0.172  | 1.22E-08 | 4.43E-08 | 4.674318 | 17 |
| 6179_at   | YDR305C | HNT2   | 7.455268 | 7.615682 | 8.473265 | 7.706535 | 7.572874 | 7.108518 | 7.124903 | 7.22497  | 7.238956 | 6.961918 | 6.795523 | 6.845004 | 6.722421 | 6.83929  | 6.644675 | 7.029639 | -0.316  | 0.0659  | 0.000253 | 6.60E-05 | 2.31175  | 16 |
| 6180_i_at | YDR305C | HNT2   | 2.964038 | 3.060545 | 2.957927 | 3.013988 | 2.830762 | 3.161672 | 3.16182  | 3.068431 | 3.148649 | 2.955714 | 3.071058 | 3.24357  | 2.750979 | 2.924407 | 2.933356 | 3.087251 | -0.025  | -0.0437 | 0.0538   | 0.006924 | 1.154389 | 13 |
| 6181_r_at | YDR305C | HNT2   | 2.38449  | 2.663117 | 2.535746 | 2.900751 | 2.807426 | 2.79866  | 2.662229 | 2.635758 | 2.76407  | 2.694398 | 2.78998  | 3.01397  | 2.64334  | 2.799532 | 2.642566 | 2.792849 | 0.0156  | -0.0327 | 0.223    | 0.024623 | 1.109843 | 13 |
| 6182_f_at | YDR305C | HNT2   | 3.456223 | 4.001481 | 3.228132 | 3.11299  | 3.213905 | 2.882525 | 3.751159 | 3.527966 | 3.48319  | 3.501344 | 3.42572  | 3.875791 | 3.306358 | 3.020237 | 3.895837 | 3.439706 | 0.0028  | 0.00371 | 0.997    | 0.094763 | 1.013454 | 13 |
| 6183_at   | YDR306C |        | 7.539818 | 7.745339 | 6.895954 | 7.592215 | 7.516762 | 7.830781 | 7.917018 | 7.786676 | 8.022899 | 8.078693 | 8.136345 | 8.028358 | 6.91041  | 7.523875 | 7.596443 | 7.972829 | 0.0178  | -0.171  | 0.0101   | 0.001575 | 1.556884 | 12 |
| 6184_at   | YDR307W |        | 6.838587 | 7.210304 | 6.45635  | 6.910817 | 6.982903 | 6.8989   | 6.855391 | 6.508533 | 6.581591 | 6.300301 | 6.516229 | 6.26072  | 6.612025 | 6.536638 | 6.038186 | 6.563669 | -0.227  | -0.0271 | 0.00514  | 0.000874 | 1.82621  | 16 |
| 6185_at   | YDR308C | SRB7   | 7.109004 | 7.546882 | 7.235784 | 7.714627 | 7.281544 | 6.99621  | 6.496324 | 6.6637   | 6.691807 | 6.468785 | 6.309494 | 5.663718 | 5.989435 | 6.225721 | 5.803504 | 6.450114 | -0.376  | 0.062   | 0.000105 | 3.19E-05 | 2.709413 | 16 |
| 6186_at   | YDR309C | GIC2   | 7.498343 | 7.80124  | 6.469462 | 7.872693 | 7.838043 | 7.359067 | 8.138002 | 7.940511 | 7.772671 | 9.078357 | 8.87048  | 8.718148 | 8.81465  | 8.128663 | 7.928643 | 8.392896 | 0.259   | -0.224  | 0.0057   | 0.000956 | 2.60746  | 9  |
| 6187_at   | YDR267C | CI A1  | 7.233774 | 7.058687 | 6.953877 | 6.536226 | 6.644553 | 6.237641 | 6.735075 | 6.592968 | 6.221493 | 6.726719 | 6.301599 | 6.03862  | 5.31137  | 5.078312 | 4.961112 | 6.323107 | -0.468  | -0.0673 | 7.01E-06 | 3.61E-06 | 3.459816 | 16 |
| 6188_at   | YDR268W | MSW1   | 5.456009 | 5.435551 | 5.760679 | 5.582636 | 5.603415 | 5.68696  | 5.883929 | 5.45871  | 5.458787 | 5.254048 | 5.250341 | 5.522188 | 4.648553 | 4.611304 | 4.663537 | 5.500417 | -0.247  | -0.109  | 2.24E-06 | 1.53E-06 | 2.007275 | 15 |
| 6189_at   | YDR269C |        | 4.390331 | 4.212122 | 5.433445 | 4.102253 | 4.319254 | 4.362358 | 4.403089 | 3.974656 | 4.136531 | 4.145366 | 4.271892 | 3.954113 | 3.920541 | 3.886006 | 4.103227 | 4.055837 | -0.163  | 0.0697  | 0.0433   | 0.005077 | 1.53908  | 16 |
| 6190_at   | YDR270W | CCC2   | 5.111374 | 5.664834 | 6.0312   | 6.258817 | 7.103426 | 5.886232 | 7.615482 | 6.423963 | 6.26925  | 8.433438 | 6.72481  | 6.90237  | 5.858007 | 6.449799 | 7.071261 | 0.253    | -0.229  | 0.031   | 0.004238 | 2.613723 | 9        |    |
| 6191_at   | YDR271C |        | 4.144567 | 4.336953 | 5.25567  | 4.662627 | 4.587457 | 4.673929 | 4.331408 | 4.252586 | 4.451383 | 4.26031  | 4.570404 | 4.422642 | 4.495372 | 4.353718 | 4.529003 | 4.43431  | -0.0402 | 0.0262  | 0.679    | 0.067045 | 1.1367   | 13 |
| 6192_at   | YDR272W | GLO2   | 7.092846 | 6.932435 | 7.082836 | 7.868324 | 7.858428 | 7.509648 | 8.11332  | 7.97738  | 8.194208 | 7.286103 | 7.286103 | 7.286562 | 6.581306 | 6.188713 | 6.575673 | 7.811741 | -0.19   | -0.29   | 1.24E-05 | 5.63E-06 | 2.708188 | 15 |
| 6193_at   | YDR273W | DON1   | 5.197    | 5.066717 | 5.226123 | 5.766488 | 5.778535 | 5.884256 | 6.222229 | 6.185912 | 5.997303 | 7.037431 | 6.698633 | 6.863287 | 6.454194 | 7.309624 | 7.166127 | 6.521663 | 0.505   | -0.128  | 7.15E-07 | 6.57E-07 | 3.811674 | 7  |
| 6194_at   | YDR274C |        | 5.993932 | 5.764707 | 5.247569 | 5.603286 | 5.487876 | 5.627871 | 5.878956 | 5.636263 | 5.751005 | 5.861251 | 5.810738 | 5.323449 | 5.572263 | 5.871817 | 5.794497 | 5.672273 | 0.0227  | 0.00799 | 0.852    | 0.082193 | 1.062056 | 13 |
| 6195_at   | YDR275W | BSC2   | 7.292535 | 7.398024 | 6.85622  | 7.910751 | 7.65722  | 7.756815 | 8.150946 | 8.275259 | 8.322888 | 8.662479 | 8.585852 | 8.825324 | 7.752411 | 7.462906 | 8.22782  | 8.504222 | 0.204   | -0.282  | 9.08E-05 | 2.82E-05 | 2.74798  | 10 |
| 6196_at   | YDR276C | PMP3   | 11.83611 | 11.58979 | 11.10287 | 12.00737 | 11.90564 | 11.98553 | 11.94856 | 12.27276 | 12.12074 | 12.38771 | 12.56845 | 12.72252 | 11.93663 | 12.31668 | 12.34427 | 12.35855 | 0.205   | -0.141  | 0.000403 | 9.78E-05 | 1.954801 | 9  |
| 6197_at   | YDR277C | MTH1   | 7.205293 | 6.878857 | 5.898896 | 7.534993 | 7.560609 | 7.382585 | 7.234428 | 8.170793 | 7.749411 | 7.754708 | 7.544523 | 7.568916 | 7.822956 | 8.038672 | 8.342779 | 7.767159 | 0.325   | -0.106  | 0.00408  | 0.000714 | 2.367401 | 9  |
| 6198_at   | YDR278C |        | 3.71661  | 3.632151 | 3.052157 | 3.250043 | 3.001041 | 3.170335 | 3.240463 | 3.222815 | 3.330775 | 3.374899 | 3.396232 | 3.388436 | 3.470024 | 3.446634 | 4.122497 | 3.261517 | 0.0737  | 0.0822  | 0.0512   | 0.006623 | 1.372187 | 13 |
| 6199_at   | YDR279W | RNH202 | 4.353818 | 4.454386 | 3.853477 | 4.140968 | 4.109363 | 4.08064  | 4.069947 | 4.224986 | 3.968444 | 4.344332 | 4.270824 | 4.223382 | 4.209136 | 4.296729 | 4.124186 | 4.163578 | 0.0152  | 0.0123  | 0.797    | 0.077491 | 1.05621  | 9  |
| 6200_at   | YDR280W | RRP45  | 7.258049 | 7.235979 | 6.50952  | 6.490355 | 6.901432 | 6.150787 | 6.659839 | 6.665126 | 6.144109 | 6.678973 | 6.367363 | 6.028505 | 6.569609 | 6.277919 | 6.11775  | 6.361382 | -0.167  | 0.0803  | 0.0357   | 0.004799 | 1.588161 | 16 |
| 6201_at   | YDR281C | PMM6   | 3.755272 | 3.250528 | 3.092192 | 3.982178 | 4.182591 | 4.287047 | 4.379056 | 4.904861 | 4.540415 | 4.175882 | 4.06083  | 3.974257 | 3.657789 |          |          |          |         |         |          |          |          |    |

|           |               |          |          |          |          |          |          |          |          |          |           |          |          |          |          |          |          |          |          |          |          |          |    |
|-----------|---------------|----------|----------|----------|----------|----------|----------|----------|----------|----------|-----------|----------|----------|----------|----------|----------|----------|----------|----------|----------|----------|----------|----|
| 6233_at   | YDR222W       | 6.345457 | 6.388376 | 5.561714 | 7.680304 | 7.076578 | 7.156399 | 7.77765  | 7.426869 | 7.931423 | 7.671382  | 7.032987 | 7.115868 | 6.847199 | 6.453552 | 7.798299 | 0.145    | -0.365   | 0.000368 | 9.03E-05 | 3.052494 | 10       |    |
| 6234_at   | YDR223W CRF1  | 5.243043 | 5.052741 | 4.47976  | 7.649815 | 6.990554 | 6.152233 | 7.992659 | 7.72193  | 7.591393 | 7.291328  | 6.977756 | 7.212632 | 6.231788 | 6.236315 | 6.155699 | 7.539618 | 0.29     | -0.54    | 2.42E-05 | 9.54E-06 | 5.890738 | 10 |
| 6235_at   | YDR224C HTB1  | 10.35996 | 10.45909 | 10.98885 | 9.788489 | 9.789261 | 9.694277 | 9.454658 | 9.278317 | 9.652755 | 9.604056  | 9.522037 | 9.869406 | 9.68776  | 9.300217 | 9.621584 | 9.506525 | -0.195   | 0.125    | 0.000408 | 9.89E-05 | 1.858017 | 14 |
| 6236_i_at | YDR225W HTA1  | 11.88203 | 11.63552 | 11.92761 | 11.64168 | 11.79542 | 11.90154 | 11.53399 | 11.70205 | 11.42792 | 11.29676  | 11.31658 | 11.25481 | 11.44645 | 11.75653 | 11.48519 | 11.46555 | -0.0964  | 0.0656   | 0.0153   | 0.002252 | 1.368609 | 13 |
| 6237_at   | YDR226W ADK1  | 11.20401 | 11.26033 | 11.49554 | 10.85582 | 10.95518 | 11.131   | 10.46217 | 10.29617 | 10.39708 | 9.052178  | 9.124747 | 9.291687 | 9.584466 | 8.1063   | 8.497406 | 8.935321 | -0.883   | -0.013   | 1.66E-08 | 5.24E-08 | 10.39273 | 18 |
| 6238_at   | YDR227W SIR4  | 3.212227 | 3.692486 | 3.088474 | 3.535768 | 3.577502 | 3.181928 | 3.415232 | 3.90982  | 3.44188  | 3.805448  | 3.920244 | 3.821633 | 3.837143 | 3.852534 | 3.568132 | 3.769192 | 0.119    | -0.0656  | 0.0569   | 0.007282 | 1.419261 | 13 |
| 6239_at   | YDR228C PCF11 | 5.654686 | 5.799172 | 5.813944 | 6.013765 | 5.836223 | 5.529078 | 5.766802 | 5.876469 | 5.296565 | 5.451541  | 5.500666 | 5.511974 | 5.217552 | 5.298671 | 5.192419 | 5.595537 | -0.147   | -0.0252  | 0.00315  | 0.000569 | 1.475365 | 16 |
| 6240_at   | YDR229W IVY1  | 6.404414 | 6.428891 | 6.529935 | 6.531642 | 6.81095  | 6.527786 | 6.662761 | 6.586797 | 6.192297 | 6.588607  | 5.913624 | 6.651667 | 6.078634 | 5.651999 | 5.63919  | 6.321356 | -0.207   | -0.0501  | 0.0074   | 0.001199 | 1.732525 | 16 |
| 6241_at   | YDR230W       | 5.317086 | 5.401981 | 5.316706 | 5.028863 | 6.629118 | 4.885994 | 5.44594  | 5.338057 | 4.814791 | 4.913414  | 5.23292  | 4.996677 | 5.309184 | 5.717444 | 5.072371 | 5.108458 | -0.00503 | 0.0684   | 0.322    | 0.034212 | 1.189446 | 13 |
| 6242_at   | YDR231C COX20 | 9.461243 | 9.180356 | 9.132858 | 9.802728 | 9.937175 | 9.640828 | 10.56686 | 10.28482 | 9.980931 | 10.29548  | 9.948556 | 9.905352 | 9.863792 | 9.587941 | 9.578786 | 10.16658 | 0.0987   | -0.193   | 0.000866 | 0.000188 | 1.867947 | 12 |
| 6243_at   | YDR232W HEM1  | 4.955934 | 9.27562  | 8.94881  | 8.98079  | 8.97237  | 9.646173 | 9.368506 | 9.300281 | 9.311794 | 9.310999  | 9.22323  | 9.56217  | 9.963878 | 9.36039  | 10.0843  | 9.329944 | 0.148    | 0.0501   | 0.0252   | 0.00352  | 1.480261 | 13 |
| 6244_at   | YDR233C RTN1  | 11.57083 | 11.29442 | 10.86682 | 11.83986 | 11.73925 | 11.43281 | 11.97402 | 11.90892 | 11.7825  | 12.37295  | 12.26301 | 12.36379 | 12.14032 | 11.68466 | 12.22097 | 12.11784 | 0.229    | -0.137   | 0.000352 | 8.71E-05 | 2.013843 | 9  |
| 6245_at   | YDR234W LYS4  | 8.903688 | 9.19791  | 8.966355 | 8.542364 | 8.5537   | 8.335035 | 8.330455 | 8.294294 | 8.13513  | 8.311745  | 8.516932 | 8.282973 | 8.39193  | 8.360101 | 8.363942 | 8.264019 | -0.148   | 0.117    | 0.000105 | 3.71E-05 | 1.684508 | 14 |
| 6246_at   | YDR235W PRP42 | 6.193838 | 6.607128 | 6.595865 | 6.462066 | 6.472294 | 6.301299 | 6.349231 | 6.337963 | 6.130273 | 6.578173  | 6.582248 | 6.509139 | 7.723949 | 6.976304 | 6.89839  | 6.431257 | 0.192    | 0.111    | 0.00056  | 0.00013  | 1.810126 | 8  |
| 6247_at   | YDR236C FMN1  | 7.38343  | 7.395435 | 8.302865 | 7.297237 | 7.319956 | 7.596795 | 7.362314 | 7.057791 | 7.257357 | 7.191065  | 7.219774 | 7.466843 | 6.719208 | 6.514741 | 7.064107 | 7.232689 | -0.22    | -0.0024  | 0.00815  | 0.001303 | 1.791331 | 16 |
| 6248_at   | YDR237W MRPL7 | 7.212347 | 7.176103 | 7.418588 | 7.719976 | 7.857876 | 7.817993 | 7.741044 | 7.622413 | 7.830444 | 7.783395  | 7.639987 | 7.829137 | 7.50498  | 7.16503  | 7.229873 | 7.818169 | -0.00324 | -0.144   | 5.85E-05 | 1.97E-05 | 1.42029  | 12 |
| 6249_at   | YDR238C SEC26 | 8.898963 | 8.745577 | 8.7254   | 8.976973 | 8.891394 | 8.852478 | 8.5354   | 8.99399  | 8.870424 | 8.412992  | 8.675749 | 8.899286 | 8.418088 | 8.386434 | 8.210632 | 8.767347 | -0.0723  | -0.0213  | 0.179    | 0.020193 | 1.21114  | 13 |
| 6250_at   | YDR239C       | 6.517962 | 6.768065 | 7.106793 | 7.194899 | 6.91158  | 7.207479 | 7.191582 | 7.57444  | 7.151748 | 7.998169  | 7.874475 | 8.060828 | 6.754035 | 7.280378 | 7.153393 | 7.615124 | 0.13     | -0.194   | 0.00475  | 0.000815 | 1.974133 | 13 |
| 6251_at   | YDR240C SNU56 | 4.266484 | 4.260555 | 3.53524  | 4.030692 | 3.753766 | 3.984739 | 3.945754 | 4.019427 | 4.027384 | 4.17602   | 3.982472 | 3.897739 | 3.702991 | 3.772212 | 4.007164 | 3.983931 | -0.0385  | -0.0184  | 0.556    | 0.055966 | 1.11771  | 13 |
| 6252_at   | YDR241W BUD26 | 3.051527 | 2.980105 | 2.671636 | 2.893032 | 2.637861 | 2.933711 | 2.665102 | 2.872639 | 2.832833 | 2.735183  | 2.772703 | 2.758517 | 2.732427 | 2.878871 | 2.789024 | 2.773066 | -0.0203  | 0.0171   | 0.608    | 0.060629 | 1.076651 | 13 |
| 6253_at   | YDR242W AMD2  | 6.488274 | 6.44883  | 5.744462 | 6.736727 | 6.915915 | 6.463547 | 6.755939 | 6.988836 | 6.880573 | 7.373339  | 7.372016 | 7.351121 | 6.117293 | 6.863813 | 6.857224 | 7.586042 | 0.0861   | -0.336   | 0.0219   | 0.03107  | 2.589053 | 12 |
| 6254_at   | YDR243C PRP28 | 5.936409 | 5.920787 | 5.539098 | 5.76685  | 5.988329 | 5.968687 | 5.840382 | 5.7034   | 5.885351 | 6.11044   | 5.770747 | 5.515702 | 4.769591 | 5.605452 | 5.11914  | 5.822977 | -0.159   | -0.0934  | 0.0042   | 0.000732 | 1.638322 | 15 |
| 6255_at   | YDR198C RKM2  | 3.656837 | 3.923429 | 4.831065 | 3.745963 | 3.888412 | 3.711558 | 3.674088 | 3.61802  | 3.575512 | 3.466744  | 3.41712  | 3.621023 | 3.464224 | 3.128191 | 3.240892 | 3.534948 | -0.218   | 0.047    | 0.00531  | 0.000898 | 1.784033 | 16 |
| 6256_at   | YDR199W       | 5.299727 | 5.411719 | 6.04464  | 5.159972 | 5.211928 | 4.937771 | 4.992743 | 5.01078  | 4.949654 | 4.904909  | 5.096324 | 4.748457 | 5.063695 | 4.958516 | 5.15082  | 4.904408 | -0.131   | 0.113    | 0.00206  | 0.000396 | 1.623286 | 14 |
| 6257_at   | YDR200C VPS64 | 4.992718 | 5.516136 | 6.198895 | 5.110296 | 4.958826 | 4.86553  | 5.35768  | 5.119644 | 4.859103 | 5.416819  | 5.173653 | 5.429656 | 5.112472 | 5.088702 | 5.150752 | 5.108689 | -0.0694  | 0.0575   | 0.403    | 0.041902 | 1.248373 | 13 |
| 6258_at   | YDR201W SPC19 | 7.023369 | 6.844076 | 7.317148 | 6.174729 | 6.32119  | 6.873442 | 5.785843 | 5.906745 | 5.510006 | 5.583171  | 5.438613 | 5.022433 | 5.127658 | 4.84215  | 4.797054 | 5.470536 | -0.55    | 0.143    | 1.15E-07 | 1.87E-07 | 4.297496 | 18 |
| 6259_at   | YDR202C RAV2  | 6.803924 | 7.145111 | 7.598515 | 7.399081 | 7.172359 | 7.021793 | 7.376522 | 7.379638 | 7.340796 | 6.876931  | 6.946884 | 7.22962  | 5.988094 | 5.416669 | 6.242676 | 7.157641 | -0.33    | -0.173   | 2.61E-05 | 1.02E-05 | 2.679468 | 15 |
| 6260_at   | YDR203W       | 6.324269 | 3.877671 | 4.39206  | 3.308144 | 3.208106 | 3.342459 | 3.356626 | 3.323749 | 3.309607 | 3.337702  | 3.458433 | 3.142829 | 3.057003 | 3.243571 | 3.109237 | 3.214318 | -0.185   | 0.0874   | 0.00194  | 0.000375 | 1.662587 | 16 |
| 6261_at   | YDR204W COQ4  | 7.600978 | 7.361444 | 8.010008 | 8.058984 | 7.815814 | 8.274484 | 8.127466 | 8.389198 | 8.409434 | 7.36906   | 7.808292 | 6.707699 | 6.650042 | 6.744313 | 6.921532 | 7.985577 | -0.263   | -0.209   | 4.28E-05 | 1.52E-05 | 2.551026 | 12 |
| 6262_at   | YDR205W MSC2  | 5.655054 | 5.97776  | 5.780837 | 5.880184 | 5.96896  | 5.45857  | 5.627523 | 5.790345 | 6.061614 | 6.013965  | 5.913897 | 6.261092 | 5.249898 | 5.962191 | 5.73478  | 6.099292 | -0.0436  | -0.101   | 0.0498   | 0.006458 | 1.539284 | 15 |
| 6263_at   | YDR206W EBS1  | 7.641207 | 7.338457 | 6.3539   | 6.624557 | 6.921494 | 6.635665 | 7.170471 | 7.025239 | 7.117109 | 7.399139  | 7.23003  | 6.955266 | 6.454168 | 6.508165 | 6.761323 | 7.021399 | -0.0908  | -0.0571  | 0.307    | 0.038222 | 1.335818 | 13 |
| 6264_at   | YDR207C WSC   | 6.753999 | 6.793552 | 6.672598 | 6.368209 | 6.829712 | 6.576838 | 6.785792 | 6.364676 | 6.525755 | 6.265302  | 6.713232 | 6.65684  | 6.190523 | 6.19052  | 6.248612 | 6.676173 | -0.128   | -0.078   | 0.0365   | 0.004905 | 1.969599 | 16 |
| 6265_at   | YDR208W MSS4  | 6.29916  | 6.388421 | 5.783132 | 6.264596 | 6.203191 | 6.27085  | 6.563941 | 6.198702 | 6.381738 | 6.850768  | 6.732316 | 6.960366 | 6.701822 | 6.978344 | 7.106153 | 6.592828 | 0.232    | -0.0173  | 0.000615 | 0.00014  | 1.847642 | 9  |
| 6266_at   | YDR209C       | 5.570453 | 5.83713  | 6.470444 | 4.65565  | 5.196964 | 5.111695 | 5.126527 | 4.776965 | 4.833657 | 4.917184  | 5.121436 | 4.442241 | 4.607966 | 5.086216 | 5.071765 | 4.832694 | -0.11    | 0.0837   | 0.149    | 0.017196 | 1.461623 | 16 |
| 6267_at   | YDR210W       | 9.873405 | 10.02953 | 10.18152 | 9.447815 | 9.60437  | 9.4555   | 8.782087 | 8.906062 | 9.067967 | 9.067583  | 9.021117 | 8.736833 | 8.471212 | 8.774876 | 9.057896 | 8.940313 | -0.323   | 0.128    | 3.33E-05 | 1.24E-05 | 2.352275 | 14 |
| 6268_at   | YDR211W GCD6  | 7.121177 | 7.171834 | 6.090212 | 6.239249 | 6.444163 | 6.031039 | 6.619839 | 6.45502  | 6.170539 | 6.495936  | 6.316842 | 5.664903 | 5.776632 | 5.90362  | 5.361992 | 6.17922  | -0.268   | 0.0114   | 0.0118   | 0.0018   | 2.034412 | 16 |
| 6269_at   | YDR212W TCP1  | 9.838517 | 9.673476 | 9.314072 | 9.293511 | 9.219275 | 9.453938 | 9.267146 | 9.347731 | 9.056971 | 9.219961  | 9.203182 | 9.199212 | 9.153563 | 9.063673 | 9.378995 | 9.190005 | -0.0999  | 0.0579   | 0.00865  | 0.001368 | 1.531118 | 13 |
| 6270_at   | YDR213W UPC2  | 7.522418 | 7.660023 | 7.160023 | 6.767472 | 6.797221 | 7.012162 | 6.405633 | 6.73103  | 6.514201 | 6.8787615 | 7.801972 | 7.675117 | 6.853306 | 8.912468 | 8.543468 | 8.608691 | 0.34     | 0.347    | 3.6E-06  | 4.28E-06 | 3.998886 | 8  |
| 6271_at   | YDR214W AH1   | 7.730701 | 7.812274 | 7.825229 | 8.031234 | 7.971    | 8.044128 | 7.770411 | 7.959152 | 7.936112 | 7.937293  | 8.014145 | 8.931077 | 8.865848 | 9.415715 | 7.917495 | 7.984905 | 0.13     | 1.01E-05 | 2.70E-06 | 2.299023 | 8        |    |
| 6272_at   | YDR215C       | 6.370457 | 6.156703 | 6.248744 | 6.242997 | 6.164899 | 6.361142 | 6.222265 | 6.403449 | 6.359164 | 6.396305  | 6.505909 | 6.192736 | 6.487529 | 6.469602 | 6.53613  | 6.336341 | 0.0635   | 0.0104   | 0.0193   | 0.002777 | 1.183427 | 13 |
| 6273_at   | YDR216W ADR1  | 4.074001 | 3.911561 | 3.817159 | 4.272844 | 4.165055 | 4.089009 | 4.725648 | 4.911308 | 4.58876  | 5.195458  | 5.045874 | 4.911911 | 4.409258 | 7.001063 | 7.98726  | 4.925029 | 0.956    | 0.241    | 8.10E-09 | 3.26E-08 | 1.625049 | 5  |
| 6274_at   | YDR217C RAD9  | 3.193282 | 3.28624  | 3.532108 | 3.736682 | 3.485441 | 3        |          |          |          |           |          |          |          |          |          |          |          |          |          |          |          |    |

|         |               |          |          |          |          |          |          |          |          |          |           |          |           |          |          |          |          |         |          |          |          |          |    |
|---------|---------------|----------|----------|----------|----------|----------|----------|----------|----------|----------|-----------|----------|-----------|----------|----------|----------|----------|---------|----------|----------|----------|----------|----|
| 6305_at | YDR159W SAC3  | 5.072426 | 5.221833 | 4.867508 | 5.043049 | 5.077158 | 4.569448 | 5.518724 | 5.146681 | 4.966578 | 4.900573  | 4.767475 | 4.883433  | 5.185962 | 5.061948 | 4.686368 | 4.974072 | -0.0295 | 0.0101   | 0.827    | 0.080124 | 1.081356 | 13 |
| 6306_at | YDR160W S5Y1  | 5.44005  | 5.804271 | 4.931901 | 5.822816 | 6.011486 | 5.285315 | 6.134248 | 5.607293 | 5.354682 | 5.866135  | 5.366006 | 5.848884  | 5.6721   | 5.567927 | 5.161188 | 5.743016 | 0.0128  | -0.0846  | 0.328    | 0.034828 | 1.252543 | 13 |
| 6307_at | YDR161W       | 5.793497 | 6.156256 | 6.179773 | 5.48624  | 5.494756 | 5.190566 | 5.407685 | 5.439373 | 4.757235 | 5.132526  | 4.767169 | 4.54921   | 4.133537 | 4.189414 | 3.967682 | 4.942916 | -0.497  | 0.0336   | 9.39E-07 | 8.11E-07 | 3.73366  | 18 |
| 6308_at | YDR162C NBP2  | 6.353873 | 6.023042 | 6.07348  | 5.729312 | 6.730862 | 5.358665 | 6.653327 | 6.012158 | 5.505578 | 6.164379  | 6.007038 | 5.865554  | 7.04818  | 6.03241  | 5.914378 | 6.143211 | 0.0793  | 0.0225   | 0.742    | 0.072749 | 1.23392  | 13 |
| 6309_at | YDR163W CWC15 | 7.198826 | 7.310903 | 7.482453 | 7.295151 | 7.233676 | 7.098124 | 7.531591 | 7.499198 | 6.969634 | 7.789643  | 7.351191 | 7.387713  | 7.997995 | 7.067662 | 7.384872 | 7.381918 | 0.0611  | 0.00372  | 0.541    | 0.05461  | 1.175691 | 13 |
| 6310_at | YDR164C S1    | 5.017095 | 5.745674 | 5.864661 | 5.895245 | 5.801848 | 5.622101 | 5.555671 | 6.005943 | 5.487325 | 5.503398  | 5.47954  | 5.748861  | 5.007621 | 5.512126 | 4.853233 | 5.665653 | -0.194  | -0.0817  | 3.46E-05 | 1.28E-05 | 1.671697 | 16 |
| 6311_at | YDR165W TRM82 | 6.448582 | 6.937171 | 7.120896 | 6.464308 | 6.803427 | 6.279526 | 6.50076  | 6.419485 | 6.103924 | 6.211921  | 6.004123 | 5.699177  | 5.221832 | 5.12768  | 5.025266 | 6.133222 | -0.444  | -0.0418  | 1.67E-06 | 1.24E-06 | 3.245399 | 16 |
| 6312_at | YDR166C SEC5  | 6.757428 | 6.800043 | 6.709151 | 7.050262 | 7.081149 | 6.711678 | 7.384937 | 7.187413 | 7.077835 | 7.302417  | 7.334307 | 6.776894  | 6.28201  | 6.832077 | 7.23466  | -0.00826 | -0.152  | 0.00156  | 0.000312 | 1.45776  | 12       |    |
| 6313_at | YDR167W TAF10 | 8.570961 | 8.569852 | 8.880499 | 8.236809 | 8.426169 | 8.058057 | 8.257086 | 8.164977 | 7.646692 | 7.99042   | 7.646003 | 7.212978  | 7.413542 | 7.07024  | 6.75788  | 7.793801 | -0.421  | 0.0232   | 2.08E-05 | 8.47E-06 | 3.054061 | 16 |
| 6314_at | YDR168W CDC37 | 7.04657  | 7.40311  | 7.865869 | 7.096174 | 7.115436 | 7.25487  | 7.49966  | 7.272763 | 7.443469 | 7.574573  | 7.43309  | 7.674023  | 7.415902 | 7.677747 | 7.991014 | 7.401318 | 0.0939  | 0.0405   | 0.128    | 0.01497  | 1.301063 | 13 |
| 6315_at | YDR169C STB3  | 4.8886   | 5.06788  | 5.692744 | 5.159457 | 5.134599 | 4.985625 | 5.60777  | 5.296812 | 5.409947 | 6.116467  | 5.910109 | 5.865837  | 6.465001 | 5.852711 | 6.60381  | 5.619677 | 0.328   | 0.0323   | 0.000569 | 0.000131 | 2.387303 | 7  |
| 6316_at | YDR170C SEC7  | 8.18776  | 8.163212 | 7.915984 | 7.568442 | 7.640003 | 7.559872 | 7.606523 | 7.493646 | 7.414393 | 7.346288  | 7.63149  | 7.276243  | 7.164913 | 6.873781 | 6.93421  | 7.397222 | -0.265  | 0.0365   | 5.7E-06  | 3.09E-06 | 2.019984 | 16 |
| 6317_at | YDR171W HSP42 | 7.363961 | 7.312535 | 7.598833 | 8.440933 | 8.274177 | 7.817947 | 8.386656 | 8.594617 | 8.921477 | 8.419845  | 8.628598 | 8.645275  | 9.090137 | 9.050495 | 8.863447 | 8.648197 | 0.382   | -0.118   | 2.58E-05 | 1.01E-05 | 2.755437 | 7  |
| 6318_at | YDR172W SUP35 | 8.180652 | 7.91938  | 7.854903 | 6.765236 | 7.583005 | 7.2397   | 7.231484 | 7.623676 | 7.352521 | 6.988939  | 6.746477 | 6.375076  | 7.059334 | 6.314918 | 6.319763 | 7.018526 | -0.398  | 0.0725   | 5.02E-05 | 1.73E-05 | 2.870409 | 16 |
| 6319_at | YDR173C ARG82 | 5.112893 | 5.333298 | 4.975977 | 6.588993 | 5.738032 | 5.279254 | 6.299688 | 6.062286 | 6.013404 | 7.937295  | 7.29385  | 7.583646  | 8.780765 | 8.608444 | 8.833058 | 6.811113 | 1.01    | 0.0257   | 1.75E-08 | 5.40E-08 | 1.468789 | 6  |
| 6320_at | YDR174W HMO1  | 9.752305 | 9.767928 | 9.64027  | 10.0687  | 9.987843 | 9.8498   | 9.831075 | 8.851432 | 10.22404 | 9.688645  | 9.84845  | 10.16139  | 9.161407 | 9.419346 | 9.563085 | 9.962919 | -0.0906 | -0.112   | 0.000844 | 0.000184 | 1.513976 | 16 |
| 6321_at | YDR175C S2M24 | 7.873594 | 7.866241 | 7.012703 | 8.166427 | 8.380337 | 7.995943 | 8.762661 | 8.357551 | 8.396831 | 8.635382  | 8.284137 | 8.233401  | 7.085555 | 7.032866 | 6.886426 | 8.457345 | -0.139  | -0.321   | 1.47E-05 | 6.38E-06 | 2.661396 | 12 |
| 6322_at | YDR176W NGG1  | 5.576361 | 5.658645 | 5.488346 | 5.203513 | 5.334862 | 5.154292 | 5.400097 | 5.195679 | 4.981366 | 5.326716  | 5.142146 | 4.959764  | 4.765222 | 5.02141  | 4.659361 | 5.119453 | -0.181  | 0.0185   | 0.000415 | 0.0001   | 1.616933 | 16 |
| 6323_at | YDR133C       | 10.68114 | 10.98932 | 10.71282 | 10.59275 | 10.73821 | 10.41666 | 10.39198 | 10.6181  | 10.11787 | 10.750269 | 9.969335 | 10.178478 | 10.2956  | 10.20233 | 10.11882 | 10.43091 | -0.131  | 0.022    | 0.0728   | 0.009079 | 1.413789 | 16 |
| 6324_g  | at YDR133C    | 10.12777 | 10.36762 | 10.11791 | 9.964186 | 9.922059 | 9.952909 | 9.52543  | 9.969799 | 9.858489 | 10.15178  | 9.300616 | 10.08329  | 9.671699 | 9.308831 | 9.492499 | 9.793828 | -0.169  | 0.0136   | 0.0179   | 0.002594 | 1.565614 | 16 |
| 6325_at | YDR135C YCF1  | 6.000103 | 6.139109 | 6.581625 | 5.741235 | 6.800301 | 6.173923 | 6.393916 | 5.770306 | 5.927705 | 5.917273  | 5.795339 | 6.381856  | 6.183259 | 5.370521 | 6.200416 | 5.940759 | -0.0681 | 0.0349   | 0.498    | 0.050666 | 1.231915 | 13 |
| 6326_at | YDR136C VPS61 | 3.176346 | 3.057454 | 4.503973 | 3.203557 | 3.17784  | 3.19651  | 3.159264 | 3.204037 | 3.198577 | 3.825889  | 3.815507 | 4.521665  | 3.708534 | 3.280456 | 3.534121 | 3.526788 | 0.067   | -0.00456 | 0.808    | 0.07847  | 1.194409 | 13 |
| 6327_at | YDR137W RGP1  | 7.469482 | 7.595583 | 7.600033 | 7.121174 | 7.265822 | 6.791744 | 7.432912 | 7.41935  | 6.881539 | 7.729376  | 7.627009 | 7.637294  | 6.851649 | 6.858237 | 6.561109 | 7.322529 | -0.132  | -0.0554  | 0.12     | 0.014165 | 1.444299 | 16 |
| 6328_at | YDR138W HPR1  | 5.244942 | 5.135475 | 5.479865 | 4.950754 | 4.988759 | 4.592088 | 5.780369 | 5.618897 | 5.553479 | 6.458977  | 6.230969 | 6.078859  | 6.1951   | 5.161509 | 5.846841 | 5.735763 | 0.215   | -0.0775  | 0.105    | 0.012598 | 1.76892  | 9  |
| 6329_at | YDR139C RUB1  | 9.379171 | 9.508381 | 10.37458 | 10.23241 | 10.12866 | 10.38891 | 9.570519 | 9.72327  | 9.75213  | 9.807859  | 9.455849 | 10.04323  | 9.293467 | 9.136976 | 9.851142 | 9.874566 | -0.111  | -0.0706  | 0.175    | 0.019797 | 1.426674 | 16 |
| 6330_at | YDR139C RUB1  | 8.264883 | 8.121705 | 9.053035 | 8.753368 | 8.593779 | 9.001588 | 7.798533 | 8.413088 | 8.838661 | 8.511445  | 8.098191 | 8.743348  | 4.474679 | 7.157194 | 8.16923  | 8.490636 | -0.232  | -0.121   | 0.0178   | 0.00258  | 1.969649 | 15 |
| 6331_at | YDR140W MTPQ2 | 6.32405  | 6.202717 | 6.821098 | 7.109752 | 7.064004 | 6.958094 | 7.084769 | 7.173354 | 7.023795 | 7.341098  | 7.562991 | 7.647476  | 6.212995 | 6.446938 | 6.672341 | 7.345856 | 0.0311  | -0.249   | 8.81E-05 | 2.75E-05 | 1.919431 | 12 |
| 6332_at | YDR141C DOP1  | 5.273777 | 5.453819 | 4.55576  | 5.102221 | 5.128614 | 4.655372 | 5.365762 | 5.080797 | 5.41756  | 5.148555  | 5.232639 | 5.324725  | 4.297941 | 4.855237 | 5.069228 | 5.27475  | -0.0878 | -0.0967  | 0.0743   | 0.009239 | 1.453478 | 12 |
| 6333_at | YDR142C PEX7  | 5.170633 | 5.115754 | 4.395368 | 5.302071 | 5.145496 | 5.373629 | 5.179589 | 4.94697  | 5.369632 | 5.223058  | 5.006922 | 5.34223   | 4.406716 | 5.097834 | 4.727659 | 5.266506 | -0.0523 | -0.119   | 0.0358   | 0.004823 | 1.430947 | 16 |
| 6334_at | YDR143C SAN1  | 6.978101 | 6.55711  | 6.05311  | 6.61906  | 6.422036 | 6.555463 | 6.654245 | 6.4404   | 6.601574 | 6.936117  | 6.937989 | 7.072404  | 7.464457 | 7.067694 | 7.482542 | 6.764758 | 0.263   | 0.0628   | 9.51E-05 | 2.94E-05 | 2.006949 | 8  |
| 6335_at | YDR144C MKC7  | 6.309329 | 6.099396 | 5.542475 | 5.200699 | 5.247302 | 5.253817 | 4.530342 | 4.368271 | 4.699106 | 4.1512    | 4.378311 | 4.275603  | 4.422215 | 4.36773  | 4.013458 | 4.407408 | -0.46   | 0.201    | 2.08E-06 | 1.46E-06 | 3.40663  | 14 |
| 6336_at | YDR145W TAF12 | 5.638653 | 5.577715 | 4.730272 | 5.012383 | 5.292322 | 5.032031 | 5.632967 | 5.28403  | 5.226183 | 5.764128  | 5.458406 | 5.11243   | 5.285312 | 5.540355 | 5.404777 | 5.339798 | 0.0472  | 0.00195  | 0.73     | 0.071623 | 1.133228 | 13 |
| 6337_at | YDR146C SKW15 | 5.174964 | 5.211774 | 4.190659 | 4.638787 | 4.482832 | 4.196018 | 3.917333 | 3.718319 | 3.767128 | 3.339436  | 3.340291 | 3.206165  | 3.048607 | 3.129839 | 3.018804 | 3.598124 | -0.502  | 0.106    | 1.41E-05 | 6.19E-06 | 3.870328 | 18 |
| 6338_at | YDR147W EK11  | 5.96893  | 6.369312 | 6.01582  | 6.307556 | 6.035786 | 6.025762 | 6.409806 | 6.071673 | 5.9818   | 6.374678  | 6.031324 | 6.002224  | 6.04963  | 6.254693 | 6.178741 | 6.173748 | 0.00219 | -0.00793 | 0.964    | 0.009209 | 1.022951 | 13 |
| 6339_at | YDR148C KGD2  | 7.823145 | 7.839262 | 7.396203 | 8.616114 | 8.532422 | 8.41822  | 8.865583 | 8.753913 | 8.831368 | 8.548426  | 8.595647 | 8.71178   | 8.416308 | 8.355402 | 8.562294 | 8.790505 | 0.165   | -0.196   | 5.89E-05 | 1.98E-05 | 2.093533 | 9  |
| 6340_at | YDR149C       | 4.893737 | 4.733253 | 4.46285  | 4.847948 | 4.800217 | 4.684906 | 4.42694  | 4.529494 | 4.797429 | 4.690248  | 4.691905 | 4.446391  | 4.548101 | 4.660964 | 4.546359 | 4.637076 | -0.0371 | 0.00307  | 0.502    | 0.051023 | 1.103266 | 16 |
| 6341_at | YDR150W NUM1  | 6.196983 | 6.375995 | 6.281919 | 6.209403 | 6.355056 | 6.157446 | 6.069875 | 6.476557 | 6.370366 | 6.791176  | 6.885021 | 7.094313  | 7.192447 | 7.463959 | 7.164397 | 6.652822 | 0.289   | 0.03     | 6.39E-06 | 3.39E-06 | 2.151244 | 7  |
| 6342_at | YDR151C CTH1  | 5.803611 | 5.657883 | 5.417021 | 5.932182 | 5.919485 | 5.870484 | 5.989954 | 6.14074  | 6.172501 | 6.230603  | 6.369492 | 6.752253  | 6.039023 | 5.817196 | 6.276013 | 6.267136 | 0.138   | -0.122   | 0.00164  | 0.000325 | 1.675878 | 9  |
| 6343_at | YDR152W GIR2  | 6.639936 | 6.927579 | 7.591741 | 6.752969 | 6.800424 | 6.497221 | 6.548051 | 6.882727 | 6.398704 | 7.117334  | 6.745369 | 6.927714  | 6.381969 | 7.437629 | 7.330273 | 6.726704 | 0.109   | 0.132    | 0.00764  | 0.001231 | 1.635227 | 13 |
| 6344_at | YDR153C ENT5  | 7.610909 | 7.646754 | 7.276436 | 7.451347 | 7.12585  | 7.251854 | 7.255508 | 7.718651 | 7.208173 | 7.57386   | 7.252776 | 6.924148  | 7.91782  | 8.075921 | 7.395478 | 7.343812 | 0.0507  | 0.0878   | 0.123    | 0.014511 | 1.335331 | 13 |
| 6345_at | YDR154C       | 11.67851 | 11.91728 | 12.42644 | 12.05047 | 12.06314 | 12.23151 | 11.96564 | 11.99427 | 12.08913 | 12.04618  | 11.86129 | 12.32181  | 12.1027  | 12.17266 | 12.211   | 12.083   | 0.033   | 0.00226  | 0.717    | 0.070447 | 1.091493 | 13 |
| 6346_at | YDR111C ALT2  | 7.548804 | 7.20155  | 6.0096   |          |          |          |          |          |          |           |          |           |          |          |          |          |         |          |          |          |          |    |

|         |                |          |          |          |          |          |          |          |          |          |          |          |          |          |          |          |          |         |          |          |          |          |    |
|---------|----------------|----------|----------|----------|----------|----------|----------|----------|----------|----------|----------|----------|----------|----------|----------|----------|----------|---------|----------|----------|----------|----------|----|
| 6377_at | YDR097C MSH6   | 6.753903 | 6.893955 | 6.218444 | 6.703817 | 6.825974 | 6.485185 | 6.763853 | 6.765676 | 6.688597 | 6.429715 | 6.566015 | 6.662435 | 7.908684 | 7.252066 | 6.99425  | 6.627101 | 0.17    | 0.106    | 0.00816  | 0.001304 | 1.719202 | 8  |
| 6378_at | YDR098C GRX3   | 8.191464 | 8.406548 | 8.417844 | 7.939544 | 8.097776 | 8.050394 | 8.141013 | 7.667394 | 7.352164 | 7.649194 | 7.464666 | 7.417642 | 7.613879 | 7.554382 | 7.283347 | 7.622103 | -0.235  | 0.0818   | 0.000268 | 6.94E-05 | 1.866244 | 16 |
| 6379_at | YDR099W BMH2   | 9.717761 | 9.404109 | 8.839774 | 10.04771 | 9.878417 | 9.328936 | 10.69392 | 10.61271 | 10.43682 | 10.91543 | 10.83299 | 11.02113 | 10.42194 | 9.971391 | 10.02085 | 10.66015 | 0.267   | -0.265   | 0.000725 | 0.000161 | 2.914563 | 10 |
| 6380_at | YDR100W TVP15  | 7.547111 | 7.165154 | 7.926068 | 7.682051 | 7.453498 | 7.362897 | 7.283047 | 7.304008 | 7.141193 | 7.273301 | 7.148776 | 7.20248  | 9.01148  | 8.755494 | 9.727709 | 7.249604 | 0.107   | 0.214    | 0.00161  | 0.000319 | 1.965658 | 8  |
| 6381_at | YDR101C ARX1   | 7.045849 | 7.54396  | 7.165161 | 6.485703 | 6.799111 | 6.516271 | 6.702678 | 6.813425 | 6.308398 | 6.451031 | 9.525194 | 5.774225 | 5.20237  | 4.906361 | 4.83815  | 6.232122 | -0.578  | -0.0345  | 2.44E-07 | 3.04E-07 | 4.622938 | 18 |
| 6382_at | YDR102C        | 2.917862 | 2.846864 | 4.150692 | 2.997177 | 3.096649 | 2.966799 | 2.927848 | 2.971362 | 2.843474 | 2.838418 | 2.975987 | 2.862429 | 3.000327 | 3.906662 | 2.882599 | 2.886187 | -0.0988 | 0.0597   | 0.201    | 0.022493 | 1.354252 | 13 |
| 6383_at | YDR103W STE5   | 4.099149 | 3.940574 | 5.134425 | 4.374174 | 4.263645 | 4.199104 | 4.496942 | 4.42701  | 4.234861 | 5.241184 | 5.05324  | 5.282006 | 7.507312 | 6.040828 | 6.827637 | 4.760873 | 0.65    | 0.225    | 5.94E-06 | 3.20E-06 | 5.600223 | 5  |
| 6384_at | YDR104C SPO71  | 3.643733 | 3.682005 | 4.687845 | 3.597712 | 3.740426 | 3.708872 | 4.119792 | 4.128455 | 3.859814 | 4.149502 | 4.264089 | 4.213659 | 4.66639  | 3.936365 | 3.838554 | 4.014938 | 0.0751  | 0.00987  | 0.568    | 0.057067 | 1.220205 | 13 |
| 6385_at | YDR105C TMS1   | 8.191759 | 7.941568 | 8.65888  | 8.16777  | 8.145021 | 7.983001 | 8.148007 | 8.108482 | 8.161935 | 8.094481 | 8.025799 | 8.284723 | 7.835466 | 7.351166 | 7.726472 | 8.097686 | -0.144  | -0.0428  | 0.00873  | 0.001378 | 1.46439  | 16 |
| 6386_at | YDR106W ARP10  | 5.198109 | 5.268946 | 6.154197 | 5.213402 | 5.355147 | 5.391705 | 5.052748 | 5.189473 | 5.085975 | 4.94867  | 5.331305 | 5.153811 | 4.943183 | 5.12457  | 4.878338 | 5.123388 | -0.138  | 0.0379   | 0.0468   | 0.006113 | 1.442117 | 16 |
| 6387_at | YDR107C TMN2   | 6.649552 | 6.398288 | 5.83444  | 6.5085   | 6.088718 | 6.216336 | 5.465546 | 6.005992 | 5.938034 | 4.998926 | 5.06758  | 5.436648 | 4.846426 | 4.764948 | 4.594671 | 5.566726 | -0.454  | -0.00672 | 4.41E-05 | 1.56E-05 | 3.331765 | 16 |
| 6388_at | YDR108W GSG1   | 6.448876 | 6.246283 | 6.127171 | 6.160968 | 6.167782 | 6.116696 | 5.853757 | 5.63638  | 5.849761 | 5.979483 | 5.724904 | 5.536895 | 5.226058 | 5.392443 | 5.037246 | 5.792956 | -0.273  | -0.0109  | 2.37E-05 | 9.40E-06 | 2.061422 | 16 |
| 6389_at | YDR109C        | 5.471604 | 5.49889  | 4.730741 | 5.213808 | 5.384457 | 5.265835 | 5.88696  | 5.45089  | 5.673493 | 5.738242 | 5.595164 | 5.107057 | 4.80714  | 4.588249 | 4.121864 | 5.511763 | -0.168  | -0.181   | 0.00206  | 0.000397 | 2.025536 | 15 |
| 6390_at | YDR110W FOB1   | 5.493054 | 5.508298 | 4.906267 | 5.210515 | 5.178682 | 5.230868 | 5.299597 | 5.137299 | 5.229884 | 5.407348 | 5.068493 | 5.091601 | 5.184338 | 5.334837 | 5.228238 | 5.191789 | -0.0132 | 0.0227   | 0.683    | 0.067372 | 1.079067 | 13 |
| 6391_at | YDR067C OCA6   | 4.354232 | 4.63457  | 4.931278 | 4.891676 | 4.501017 | 4.381751 | 4.508087 | 4.446797 | 4.118398 | 4.19062  | 4.002913 | 4.286184 | 3.608197 | 3.934478 | 3.636838 | 4.285926 | -0.247  | -0.0259  | 0.000273 | 7.04E-05 | 1.926713 | 16 |
| 6392_at | YDR068W DOS2   | 7.594628 | 7.642626 | 7.728343 | 7.434043 | 7.378469 | 6.760982 | 6.335459 | 7.3654   | 6.860817 | 7.517613 | 7.053779 | 7.053197 | 7.619162 | 7.017103 | 7.230918 | 7.123043 | -0.0925 | 0.102    | 0.0509   | 0.006589 | 1.484447 | 13 |
| 6393_at | YDR069C DOA4   | 5.992222 | 5.413182 | 5.748757 | 5.818009 | 5.615634 | 5.3632   | 4.904333 | 5.932264 | 5.698707 | 5.918179 | 5.771457 | 6.145494 | 6.840066 | 6.146537 | 6.621675 | 5.871658 | 0.248   | 0.0504   | 0.00027  | 6.97E-05 | 1.923998 | 8  |
| 6394_at | YDR070C FMP16  | 7.080457 | 7.756377 | 7.353967 | 9.970719 | 9.515247 | 9.675054 | 10.44497 | 10.39663 | 10.64894 | 9.727921 | 10.03471 | 11.02076 | 9.240743 | 7.979685 | 9.815287 | 10.53451 | 0.36    | -0.553   | 4.58E-05 | 1.60E-05 | 6.801957 | 10 |
| 6395_at | YDR071C PAA1   | 8.673651 | 8.903949 | 9.333071 | 8.484389 | 8.559473 | 8.095201 | 7.988845 | 7.864985 | 7.877563 | 7.462623 | 7.390741 | 7.708813 | 6.766521 | 7.484501 | 7.648659 |          | -0.456  | 0.14     | 1.42E-05 | 6.21E-06 | 3.347152 | 14 |
| 6396_at | YDR072C IPT1   | 8.235828 | 7.966776 | 7.602939 | 8.242187 | 8.360454 | 7.841944 | 8.164189 | 8.126881 | 8.16162  | 8.168951 | 7.791317 | 8.088556 | 7.912096 | 7.372516 | 8.03649  | 8.126714 | -0.0337 | -0.0849  | 0.12     | 0.014185 | 1.288225 | 13 |
| 6397_at | YDR073W SNF11  | 5.716367 | 5.529958 | 6.086537 | 5.904599 | 5.969768 | 5.954787 | 5.427298 | 6.170719 | 5.748883 | 5.788295 | 5.816231 | 6.369239 | 7.031063 | 6.374443 | 4.730947 | 5.919765 | 0.29    | 0.123    | 0.000872 | 0.000189 | 2.247936 | 8  |
| 6398_at | YDR074W TPS2   | 8.410614 | 8.031721 | 7.79297  | 9.817106 | 9.324245 | 8.921429 | 8.989412 | 9.013864 | 9.581334 | 8.857656 | 8.717947 | 9.079428 | 11.2137  | 9.682244 | 10.42473 | 9.28821  | 0.502   | 0.00702  | 0.00462  | 0.000798 | 3.788603 | 7  |
| 6399_at | YDR075W PPH3   | 5.320679 | 5.189634 | 5.649344 | 5.332815 | 5.248886 | 4.862008 | 5.256921 | 5.328635 | 4.942542 | 5.541554 | 5.298297 | 4.963302 | 5.178496 | 5.078424 | 4.986006 | 5.176591 | -0.0588 | 0.0129   | 0.43     | 0.044465 | 1.168556 | 13 |
| 6400_at | YDR076W RAD55  | 4.399478 | 4.215902 | 3.931377 | 4.09123  | 3.985161 | 4.271385 | 3.908545 | 4.196239 | 4.316034 | 4.080003 | 4.302337 | 3.74608  | 3.86873  | 3.865102 | 4.01921  | 4.079065 | -0.069  | -0.00829 | 0.203    | 0.02268  | 1.20822  | 10 |
| 6401_at | YDR077W SED1   | 11.59451 | 11.69142 | 11.25459 | 11.67732 | 11.75915 | 11.9564  | 12.21275 | 11.89956 | 12.35423 | 12.45673 | 12.31584 | 12.17583 | 12.17583 | 12.13496 | 12.28315 | 12.24416 | 0.199   | -0.11    | 0.001165 | 4.62E-05 | 1.799427 | 9  |
| 6402_at | YDR078C SHU2   | 7.086745 | 7.269943 | 6.898022 | 7.200679 | 7.349597 | 6.830045 | 7.451467 | 7.078859 | 7.191406 | 7.875436 | 7.963383 | 7.617583 | 7.415207 | 7.773399 | 7.291629 | 7.492522 | 0.155   | -0.0611  | 0.0327   | 0.004438 | 1.50847  | 13 |
| 6403_at | YDR079W PET100 | 9.744483 | 8.129684 | 8.447595 | 9.365375 | 9.276603 | 9.792819 | 9.753547 | 9.348351 | 9.722261 | 9.595442 | 9.433557 | 10.17065 | 6.884111 | 9.08978  | 8.832258 | 8.915738 | 0.161   | -0.35    | 8.22E-06 | 4.08E-06 | 3.019173 | 10 |
| 6404_at | YDR080W VPS41  | 4.128458 | 4.434251 | 3.217923 | 4.195172 | 4.42367  | 4.009212 | 4.862956 | 4.541394 | 4.291179 | 4.661453 | 4.490419 | 4.260534 | 3.337061 | 4.447971 | 4.239909 | 4.504526 | 0.106   | -0.103   | 0.0932   | 0.011304 | 1.522351 | 13 |
| 6405_at | YDR081C PDC2   | 7.22916  | 7.151663 | 6.751631 | 6.821223 | 6.751634 | 6.924269 | 6.708214 | 6.630749 | 6.732973 | 6.402132 | 6.571175 | 6.281494 | 6.284154 | 6.8907   | 6.258005 | 6.554904 | -0.164  | 0.0585   | 0.00395  | 0.000694 | 1.543522 | 16 |
| 6406_at | YDR082W STN1   | 5.774434 | 5.539319 | 4.5224   | 5.624962 | 5.720037 | 5.18257  | 5.803803 | 5.826154 | 5.625698 | 5.819583 | 5.449057 | 5.467164 | 5.812379 | 5.386762 | 5.211938 | 5.664716 | 0.0404  | -0.0797  | 0.368    | 0.038568 | 1.94186  | 13 |
| 6407_at | YDR083W RRP8   | 8.845479 | 8.894715 | 7.792537 | 8.155365 | 8.139732 | 7.768202 | 8.347244 | 8.500775 | 7.714257 | 8.30219  | 7.741392 | 7.167409 | 7.423825 | 7.421192 | 6.925749 | 8.717148 | -0.32   | 0.000483 | 0.00853  | 0.001354 | 2.337961 | 16 |
| 6408_at | YDR084C TVP23  | 8.121723 | 8.103202 | 8.15227  | 7.748519 | 7.680886 | 7.94464  | 7.484732 | 7.398977 | 7.429014 | 7.259395 | 7.196175 | 7.188016 | 6.899757 | 7.249937 | 6.704745 | 7.328164 | -0.304  | 0.0643   | 4.18E-06 | 2.45E-06 | 2.240573 | 16 |
| 6409_at | YDR085C AFR1   | 6.082971 | 5.68262  | 5.172881 | 6.03785  | 5.906143 | 5.970584 | 6.326503 | 6.519533 | 6.443441 | 6.411993 | 6.321438 | 6.579622 | 6.868948 | 7.080128 | 7.334804 | 6.422559 | 0.366   | -0.0154  | 6.14E-05 | 2.04E-05 | 2.657919 | 7  |
| 6410_at | YDR086C SSS1   | 4.971785 | 9.654677 | 10.2131  | 9.490664 | 9.883556 | 9.713828 | 9.03397  | 9.135785 | 8.945171 | 8.43737  | 8.858021 | 9.307853 | 8.272516 | 8.460101 | 8.701435 | 8.981175 | -0.346  | 0.0435   | 0.000286 | 7.30E-05 | 2.036904 | 16 |
| 6411_at | YDR087C RRP1   | 7.683284 | 7.763248 | 7.856755 | 6.2587   | 6.575857 | 5.748553 | 5.46031  | 6.052244 | 5.193055 | 5.242546 | 4.765578 | 3.679144 | 5.313061 | 5.393967 | 4.327766 | 4.977519 | -0.756  | 0.391    | 7.2E-06  | 3.69E-06 | 8.699825 | 19 |
| 6412_at | YDR088C SLU7   | 5.679371 | 5.652389 | 4.975948 | 5.620979 | 5.584287 | 4.60973  | 5.936551 | 6.198652 | 5.444981 | 6.672535 | 6.075212 | 5.832331 | 7.155388 | 6.396716 | 6.621688 | 5.911936 | 0.373   | 0.0385   | 0.00404  | 0.000709 | 2.686282 | 7  |
| 6413_at | YDR044W HEM13  | 10.77889 | 10.70736 | 11.09737 | 9.496747 | 9.932711 | 10.40888 | 9.462627 | 8.881811 | 9.631447 | 10.48043 | 10.15263 | 10.61112 | 11.19194 | 11.32348 | 11.26984 | 9.814522 | 0.171   | 0.338    | 0.000963 | 0.000206 | 2.919226 | 8  |
| 6414_at | YDR045C RAC1   | 8.280912 | 8.317204 | 8.258017 | 7.932347 | 8.224411 | 7.79361  | 8.053212 | 7.608968 | 7.707868 | 7.820836 | 7.491273 | 7.25885  | 6.630949 | 7.278084 | 6.734405 | 7.643599 | -0.363  | -0.0163  | 1.33E-05 | 5.89E-06 | 2.615477 | 16 |
| 6415_at | YDR046C BPC13  | 8.886991 | 8.004837 | 7.11894  | 7.349979 | 7.119751 | 7.554107 | 5.363763 | 5.573329 | 5.169493 | 4.758128 | 4.723012 | 4.639971 | 4.771071 | 4.540610 | 4.844023 | 5.239616 | -0.835  | 0.333    | 0.000122 | 3.59E-05 | 9.145838 | 19 |
| 6416_at | YDR047W HEM12  | 8.898302 | 9.082838 | 9.142067 | 9.118257 | 9.83111  | 9.152534 | 9.362828 | 8.331484 | 8.641474 | 9.269351 | 8.187664 | 8.396044 | 10.05319 | 9.799974 | 8.835969 | 8.859134 | 0.0694  | 0.132    | 0.268    | 0.029092 | 1.528375 | 10 |
| 6417_at | YDR048C        | 3.024676 | 3.122847 | 2.738941 | 3.515793 | 3.395676 | 4.087335 | 3.841513 | 3.738229 | 3.455185 | 3.138452 | 3.377674 | 3.360665 | 3.640783 | 3.264025 | 3.535179 | 0.0741   | -0.0737 | 0.312    | 0.033287 | 1.343631 | 16       |    |
| 6418_at | YDR049W        | 4.820088 | 4.9      |          |          |          |          |          |          |          |          |          |          |          |          |          |          |         |          |          |          |          |    |

|           |               |          |          |          |          |          |          |          |          |          |           |          |          |          |          |          |          |          |          |          |          |          |          |    |
|-----------|---------------|----------|----------|----------|----------|----------|----------|----------|----------|----------|-----------|----------|----------|----------|----------|----------|----------|----------|----------|----------|----------|----------|----------|----|
| 6449_at   | YDR034W-BAD5  | 8.415345 | 8.569856 | 9.032147 | 8.254965 | 7.955101 | 8.196309 | 8.307076 | 8.584595 | 7.931462 | 8.743836  | 8.803975 | 8.799114 | 8.908245 | 8.916733 | 9.10366  | 8.416747 | 0.134    | 0.104    | 0.0201   | 0.002873 | 1.604417 | 13       |    |
| 6450_at   | YDR035W ARO3  | 10.67574 | 10.55603 | 9.656529 | 9.694015 | 9.793561 | 9.793136 | 10.29805 | 10.15998 | 10.37382 | 10.59455  | 10.30905 | 10.52176 | 10.29906 | 9.621565 | 10.42004 | 10.20517 | 0.0137   | -0.0106  | 0.975    | 0.092959 | 1.004823 | 13       |    |
| 6451_at   | YDR036C EHD3  | 7.816739 | 7.840136 | 7.470898 | 8.606361 | 8.516646 | 8.990818 | 9.073379 | 8.866254 | 8.92138  | 7.880385  | 8.267274 | 8.707011 | 6.937334 | 6.555792 | 7.288878 | 8.72387  | -0.247   | -0.381   | 8.71E-06 | 4.26E-06 | 3.67461  | 15       |    |
| 6452_at   | YDR037W KRS1  | 10.40725 | 10.72081 | 10.868   | 10.50159 | 10.61332 | 10.57721 | 10.14418 | 10.0857  | 10.40038 | 9.856576  | 9.602405 | 10.39438 | 8.409481 | 7.772597 | 8.515784 | 10.09573 | -0.619   | -0.177   | 2.63E-07 | 3.19E-07 | 5.164323 | 18       |    |
| 6453_at   | YDR038C ENA5  | 3.167556 | 3.379977 | 4.790467 | 3.219077 | 3.134759 | 3.374909 | 3.466649 | 3.039141 | 3.047804 | 3.240699  | 3.302492 | 3.285131 | 3.741588 | 3.731312 | 3.664639 | 3.194433 | 0.00288  | 0.149    | 0.101    | 0.012519 | 1.436385 | 13       |    |
| 6454_g_at | YDR038C ENA5  | 6.445154 | 6.286153 | 6.427414 | 6.340544 | 6.228862 | 6.303408 | 6.953033 | 6.673269 | 6.272459 | 6.423773  | 6.645423 | 6.466195 | 7.008067 | 6.33382  | 6.545896 | 6.502462 | 0.0708   | -0.00198 | 0.377    | 0.039502 | 1.206413 | 13       |    |
| 6455_s_at | YDR039C ENA2  | 5.942183 | 5.930081 | 6.718211 | 6.067422 | 5.906578 | 6.261911 | 6.242113 | 6.0871   | 5.99494  | 5.981426  | 5.991089 | 6.554805 | 6.734509 | 6.46956  | 6.828666 | 6.127879 | 0.124    | 0.0846   | 0.0206   | 0.00294  | 1.504566 | 13       |    |
| 6456_at   | YDR041W RSM10 | 7.405091 | 7.307269 | 7.813592 | 8.206902 | 8.155114 | 8.127989 | 7.694632 | 7.700185 | 8.083853 | 7.614144  | 7.414338 | 7.647486 | 6.635033 | 5.91935  | 6.734722 | 7.82535  | -0.31    | -0.228   | 1.85E-05 | 1.67E-06 | 2.891679 | 15       |    |
| 6457_at   | YDR042C       | 3.995239 | 3.644302 | 4.506679 | 4.352557 | 4.190108 | 4.181501 | 4.637133 | 4.487138 | 4.487119 | 5.397764  | 5.083012 | 4.594129 | 8.460716 | 7.149561 | 7.850282 | 4.801282 | 0.952    | 0.313    | 5.78E-08 | 1.18E-07 | 12.49057 | 5        |    |
| 6458_at   | YDR043C NRG1  | 6.579087 | 6.160836 | 5.106234 | 6.435255 | 6.284709 | 6.921381 | 6.694299 | 6.703488 | 6.946755 | 7.718379  | 8.071708 | 8.527393 | 9.696612 | 9.616387 | 10.20855 | 7.483441 | 1.05     | 0.11     | 1.04E-07 | 1.75E-07 | 16.022   | 6        |    |
| 6459_at   | YDL003W MCD1  | 4.918565 | 5.058763 | 4.824155 | 4.937281 | 5.263538 | 4.729065 | 4.674864 | 4.68887  | 4.211418 | 4.384351  | 4.408656 | 4.289837 | 3.917312 | 3.993561 | 3.498905 | 4.513155 | -0.31    | -0.0352  | 9.19E-05 | 2.85E-05 | 2.274871 | 16       |    |
| 6460_at   | YDL002C NHP10 | 4.394801 | 4.214287 | 4.260318 | 3.972707 | 4.274425 | 3.787476 | 4.739927 | 4.510076 | 4.082231 | 4.372517  | 3.990397 | 3.800013 | 3.37904  | 3.08557  | 3.127299 | 4.139021 | -0.264   | -0.114   | 0.000448 | 0.000107 | 2.097203 | 15       |    |
| 6461_at   | YDL001W RMD1  | 4.653938 | 4.964638 | 5.312452 | 4.956845 | 4.925604 | 4.853239 | 5.087968 | 4.973099 | 4.486194 | 5.028599  | 4.655798 | 5.04778  | 4.69251  | 4.459929 | 4.530501 | 4.871287 | -0.0957  | -0.0291  | 0.0983   | 0.011862 | 1.288826 | 13       |    |
| 6462_at   | YDR001C NTH1  | 8.146618 | 8.197973 | 8.432538 | 8.764115 | 8.47373  | 8.538109 | 9.200329 | 9.243321 | 8.909242 | 9.279667  | 9.418319 | 9.698924 | 9.888657 | 9.250352 | 10.01067 | 9.252059 | 0.403    | -0.0773  | 1.99E-05 | 8.15E-06 | 2.907074 | 7        |    |
| 6463_at   | YDR002W YRB1  | 11.04504 | 11.29151 | 11.17188 | 10.76814 | 10.75807 | 10.56482 | 11.01981 | 10.98652 | 10.81614 | 10.71277  | 10.71936 | 10.6199  | 10.20639 | 9.509538 | 10.20593 | 10.70178 | -0.285   | -0.041   | 0.00014  | 4.02E-05 | 5.365724 | 16       |    |
| 6464_at   | YDR003W RCR2  | 6.354092 | 6.605622 | 6.72421  | 6.632905 | 6.657024 | 6.476306 | 6.794727 | 7.07877  | 7.156922 | 6.815763  | 7.007164 | 7.242236 | 7.396441 | 6.948566 | 7.430604 | 6.959318 | 0.191    | -0.0171  | 0.00366  | 0.000649 | 1.657762 | 13       |    |
| 6465_at   | YDR004W RAD57 | 7.415572 | 7.017344 | 6.866843 | 6.922377 | 7.077865 | 6.779565 | 7.520834 | 7.1794   | 6.918328 | 8.074349  | 4.771944 | 6.996985 | 7.472173 | 6.629518 | 6.410714 | 7.270407 | 0.000543 | -0.0808  | 0.49     | 0.049938 | 1.216954 | 13       |    |
| 6466_at   | YDR005C MAF1  | 6.564074 | 6.49825  | 6.392997 | 6.790348 | 6.7965   | 6.215426 | 7.02143  | 6.664123 | 6.771776 | 6.732024  | 6.616213 | 6.834423 | 6.205308 | 5.435634 | 6.163574 | 6.744079 | -0.128   | -0.149   | 0.00235  | 0.000443 | 1.757235 | 15       |    |
| 6467_at   | YDR006C SOK1  | 6.951176 | 5.995564 | 7.084316 | 6.763446 | 6.848562 | 6.105136 | 6.997767 | 6.938902 | 7.034862 | 7.129625  | 7.13708  | 7.60329  | 8.17444  | 7.479963 | 6.357707 | 7.171848 | 0.372    | 0.0303   | 0.000259 | 6.75E-05 | 2.680188 | 7        |    |
| 6468_at   | YDR007W TRP1  | 8.954041 | 8.521101 | 8.6661   | 8.853044 | 8.848416 | 8.556668 | 8.859438 | 8.934961 | 8.746624 | 8.996786  | 8.809299 | 8.675136 | 8.529866 | 8.036551 | 8.462759 | 8.849802 | -0.0922  | -0.0881  | 0.00226  | 0.000249 | 1.436035 | 12       |    |
| 6469_at   | YDR008C       | 5.155713 | 5.148772 | 5.489437 | 4.929918 | 5.105318 | 5.044114 | 5.195267 | 4.918753 | 4.931215 | 4.790959  | 5.128214 | 4.683493 | 4.878699 | 4.840789 | 5.009623 | 4.899449 | -0.0931  | 0.0513   | 0.016    | 0.002347 | 1.315221 | 13       |    |
| 6470_at   | YDR009W GAL3  | 4.782195 | 4.774262 | 4.170244 | 4.968444 | 4.977234 | 4.970789 | 5.387665 | 5.007206 | 5.140973 | 5.590124  | 5.477838 | 5.140232 | 4.749786 | 4.697367 | 4.681332 | 5.295115 | 0.0578   | -0.182   | 0.000648 | 0.000146 | 1.703081 | 12       |    |
| 6471_at   | YDR010C       | 4.810991 | 4.534012 | 3.941089 | 4.395968 | 4.217602 | 4.785987 | 4.421215 | 4.353279 | 4.67696  | 4.870961  | 4.536434 | 4.364144 | 4.033552 | 4.621472 | 4.650586 | 4.534066 | 0.0116   | -0.0288  | 0.827    | 0.080115 | 1.093247 | 13       |    |
| 6472_at   | YDR011W SNQ2  | 7.181522 | 7.343185 | 7.090051 | 6.900035 | 6.8564   | 6.880503 | 7.47328  | 6.902767 | 7.275454 | 8.398254  | 8.071809 | 8.248999 | 9.613717 | 8.843425 | 9.694924 | 7.187836 | 0.634    | 0.176    | 1.46E-06 | 1.13E-06 | 5.365724 | 6        |    |
| 6473_i_at | YDR012W RPL4B | 10.16868 | 10.72683 | 11.28664 | 9.872755 | 9.982264 | 10.66971 | 9.936737 | 9.131749 | 9.56446  | 9.835003  | 9.389828 | 9.802458 | 8.531593 | 9.253814 | 8.952475 | 9.603938 | -0.446   | 0.0593   | 0.00102  | 0.000216 | 3.258451 | 16       |    |
| 6474_at   | YDR013W PSF1  | 5.243116 | 5.898429 | 6.054929 | 5.856752 | 5.814997 | 5.935457 | 5.384081 | 5.146786 | 5.227791 | 5.286527  | 5.637671 | 5.703767 | 5.270418 | 5.657751 | 5.492465 | 5.501205 | -0.0736  | 0.0328   | 0.437    | 0.04511  | 1.218526 | 13       |    |
| 6475_at   | YDR014W RAD61 | 4.928693 | 4.617107 | 3.800855 | 4.376246 | 4.477812 | 4.21664  | 5.040621 | 4.774905 | 4.697022 | 4.751126  | 4.408315 | 4.236892 | 4.255877 | 4.424413 | 3.971388 | 4.571902 | -0.0588  | -0.069   | 0.313    | 0.033385 | 1.291794 | 13       |    |
| 6476_at   | YDR015C       | 4.458955 | 4.470656 | 3.772838 | 4.200169 | 4.299771 | 4.232867 | 4.403668 | 4.072702 | 4.119454 | 4.025822  | 4.174568 | 4.458253 | 4.414972 | 4.073839 | 4.205827 | 4.571902 | -0.0588  | 0.0193   | 0.646    | 0.064062 | 1.099116 | 13       |    |
| 6477_at   | YDR016C DAD1  | 7.476597 | 7.62343  | 8.294032 | 7.108103 | 7.004654 | 7.55958  | 6.254571 | 6.342128 | 6.264339 | 6.339848  | 6.410459 | 6.590537 | 6.233638 | 6.563144 | 6.300864 | 6.421197 | -0.372   | 0.186    | 0.000297 | 7.54E-05 | 2.853634 | 14       |    |
| 6478_at   | YDR017C SOK1  | 7.625924 | 7.467578 | 6.971364 | 7.367993 | 7.32366  | 7.17108  | 7.592911 | 7.648726 | 7.425824 | 7.488709  | 7.532036 | 7.684266 | 7.392747 | 7.473993 | 7.381722 | 7.507908 | 0.0372   | -0.0343  | 0.393    | 0.040955 | 1.153499 | 13       |    |
| 6479_at   | YDR018C       | 4.438782 | 4.325137 | 3.526939 | 5.515721 | 5.559601 | 5.731571 | 6.28828  | 6.450084 | 6.147011 | 5.875896  | 6.077071 | 6.804218 | 5.618881 | 5.595951 | 5.846047 | 6.37415  | 0.39     | -0.405   | 8.25E-06 | 4.09E-06 | 4.992167 | 10       |    |
| 6480_at   | YDR019C GCV1  | 9.30975  | 9.41912  | 9.079383 | 8.62311  | 8.294863 | 8.623134 | 7.332926 | 7.531493 | 7.350884 | 6.473562  | 6.34332  | 6.274409 | 5.6968   | 5.914299 | 6.283228 | 6.972895 | -0.931   | 0.189    | 1E-07    | 1.71E-07 | 1.178538 | 20       |    |
| 6481_at   | YDR020C       | 3.439055 | 3.170943 | 2.562323 | 2.815145 | 2.885662 | 2.7632   | 2.97706  | 3.07287  | 2.892347 | 2.744785  | 2.842345 | 2.60373  | 2.551035 | 2.556427 | 2.438971 | 2.801224 | -0.138   | -0.00586 | 0.0198   | 0.002843 | 1.440098 | 16       |    |
| 6482_at   | YDL025C       | 7.348228 | 7.456798 | 7.317393 | 7.802971 | 7.903953 | 7.874634 | 6.068969 | 7.738985 | 8.252206 | 8.574898  | 8.955038 | 8.133005 | 8.792599 | 8.863172 | 8.821913 | 8.170985 | 0.364    | -0.018   | 1.75E-06 | 1.28E-06 | 6.242551 | 7        |    |
| 6483_at   | YDL024C DIA3  | 5.453533 | 5.078857 | 4.376218 | 6.018385 | 6.651908 | 5.861366 | 6.184736 | 6.397048 | 6.671168 | 6.781422  | 7.044313 | 7.454599 | 7.803514 | 7.559056 | 7.861027 | 6.783337 | 0.738    | -0.121   | 2.58E-07 | 3.14E-07 | 7.072362 | 4        |    |
| 6484_at   | YDL023C       | 5.365698 | 5.414996 | 4.474531 | 4.827189 | 4.872243 | 4.972385 | 5.173979 | 4.885462 | 5.433991 | 4.666202  | 4.838577 | 4.010732 | 5.040461 | 5.194852 | 4.807017 | 4.796453 | -0.0571  | 0.071    | 0.448    | 0.04625  | 1.301523 | 13       |    |
| 6485_at   | YDL022W GPD1  | 11.34753 | 11.63789 | 11.24503 | 11.6047  | 11.46399 | 11.87239 | 11.83952 | 11.66364 | 11.03098 | 11.66982  | 10.52239 | 10.44658 | 10.75653 | 11.79392 | 11.42734 | 11.60965 | 11.12448 | -0.0461  | 0.117    | 0.283    | 0.030501 | 1.429317 | 13 |
| 6486_at   | YDL021W GPM2  | 7.553823 | 7.700975 | 7.948386 | 7.579519 | 7.820121 | 7.985631 | 8.330987 | 7.252209 | 7.475878 | 7.020843  | 6.752644 | 6.902621 | 7.270945 | 6.947572 | 7.234555 | 7.291211 | -0.211   | 0.0492   | 0.0117   | 0.001788 | 1.748963 | 16       |    |
| 6487_at   | YDL020C RPN4  | 8.777548 | 8.53556  | 8.171982 | 9.074208 | 9.087968 | 7.709469 | 9.501906 | 9.303763 | 9.26239  | 10.074582 | 10.05248 | 10.16254 | 11.43642 | 11.53282 | 11.67909 | 9.794518 | 0.819    | 0.0588   | 7.07E-10 | 9.62E-09 | 8.778301 | 6        |    |
| 6488_at   | YDL019C OSH2  | 8.306482 | 8.298963 | 7.946289 | 8.662425 | 8.359076 | 8.236016 | 8.43635  | 8.288939 | 8.4023   | 8.347232  | 8.528546 | 8.564699 | 8.088125 | 8.211183 | 8.37033  | 8.457417 | 0.0119   | -0.069   | 0.0475   | 0.006817 | 1.20447  | 13       |    |
| 6489_at   | YDL018C ERP3  | 5.473138 | 5.468094 | 5.291102 | 5.7408   | 5.640011 | 5.848539 | 5.685807 | 5.748213 | 5.714415 | 5.888901  | 5.596394 | 5.846366 | 4.29383  | 4.894669 | 4.082051 | 5.773341 | -0.235   | -0.236   | 5.18E-06 | 2.89E-06 | 2.580853 | 15       |    |
| 6490_at   | YDL017W CDC7  | 6.244    |          |          |          |          |          |          |          |          |           |          |          |          |          |          |          |          |          |          |          |          |          |    |

|           |         |        |          |           |          |          |           |          |           |          |          |          |          |          |          |          |          |          |          |         |          |          |          |    |
|-----------|---------|--------|----------|-----------|----------|----------|-----------|----------|-----------|----------|----------|----------|----------|----------|----------|----------|----------|----------|----------|---------|----------|----------|----------|----|
| 6521_at   | YDL031W | DBP10  | 7.615618 | 7.685207  | 8.127795 | 7.155811 | 7.145233  | 7.043955 | 7.479425  | 7.553556 | 6.967931 | 7.696435 | 6.738967 | 6.893402 | 6.975581 | 6.827915 | 7.033103 | 7.092413 | -0.201   | 0.0729  | 0.0154   | 0.002268 | 1.704702 | 16 |
| 6522_at   | YDL030W | PRP9   | 6.442378 | 6.330583  | 6.822973 | 6.392716 | 6.439638  | 6.128456 | 6.674897  | 6.498192 | 6.332575 | 6.445319 | 6.274609 | 5.910998 | 6.097005 | 5.469133 | 5.648259 | 6.298259 | -0.2     | -0.0471 | 0.00263  | 0.000487 | 1.701415 | 16 |
| 6523_at   | YDL029W | ARP2   | 8.918365 | 8.834273  | 9.56443  | 8.890744 | 8.813815  | 8.761195 | 8.375242  | 7.964993 | 8.367565 | 7.910893 | 7.693623 | 8.15216  | 7.636507 | 7.529295 | 7.826766 | 8.132642 | -0.395   | 0.0777  | 3.57E-05 | 1.31E-05 | 2.851356 | 16 |
| 6524_at   | YDL028C | MP51   | 4.484412 | 4.726179  | 5.497291 | 4.786333 | 4.821241  | 4.690095 | 4.778012  | 4.439972 | 4.439941 | 4.175511 | 4.978426 | 5.180446 | 5.61066  | 5.553292 | 5.970084 | 4.8762   | 0.3      | 0.159   | 0.000259 | 6.73E-05 | 2.456438 | 8  |
| 6525_at   | YDL027C |        | 5.695937 | 5.776426  | 6.030717 | 6.361435 | 6.275735  | 6.091724 | 6.324306  | 6.288724 | 6.599275 | 6.012244 | 6.093714 | 6.522491 | 6.137252 | 5.241272 | 5.91984  | 6.336878 | -0.0307  | -0.147  | 0.0126   | 0.001998 | 1.476187 | 12 |
| 6526_at   | YDL026W |        | 4.50757  | 4.383345  | 4.847952 | 4.675451 | 4.322155  | 4.603378 | 4.28262   | 4.292952 | 4.314983 | 4.170907 | 4.31307  | 3.747131 | 4.365922 | 4.178354 | 4.045956 | 4.228998 | -0.124   | 0.0476  | 0.0283   | 0.009395 | 1.390853 | 16 |
| 6527_at   | YDL071C |        | 6.504073 | 6.229741  | 6.052184 | 6.326318 | 6.267263  | 6.151748 | 6.480149  | 6.411114 | 6.241911 | 6.23556  | 6.425818 | 6.166019 | 6.348346 | 6.242594 | 6.190533 | 6.308028 | -0.00166 | -0.0135 | 0.83     | 0.080361 | 1.035036 | 13 |
| 6528_at   | YDL070W | BDF2   | 6.463346 | 6.415364  | 7.060196 | 6.987353 | 7.106276  | 6.805718 | 6.858538  | 6.614631 | 6.67611  | 8.156732 | 7.351111 | 7.834414 | 8.43448  | 8.025561 | 8.37477  | 7.307396 | 0.463    | 0.0412  | 5.55E-05 | 1.89E-05 | 3.413554 | 7  |
| 6529_at   | YDL069C | CBS1   | 4.685147 | 4.733559  | 4.624448 | 4.530384 | 4.743327  | 4.304464 | 4.955456  | 4.831517 | 4.302979 | 4.867254 | 4.513507 | 4.646739 | 4.930166 | 4.56955  | 4.61503  | 4.638997 | 0.0163   | 0.0124  | 0.86     | 0.082888 | 1.058236 | 13 |
| 6530_at   | YDL068W |        | 4.777339 | 4.741059  | 4.901414 | 4.629385 | 4.703654  | 4.413597 | 4.974787  | 4.742079 | 4.440702 | 7.223509 | 5.636454 | 5.027248 | 10.15308 | 8.926323 | 8.908547 | 5.311552 | 1.2      | 0.479   | 1.58E-07 | 2.31E-07 | 26.55534 | 3  |
| 6531_at   | YDL067C | COX9   | 8.441129 | 8.526246  | 9.505837 | 10.11814 | 9.77292   | 10.32372 | 10.07917  | 10.26564 | 10.32665 | 9.712706 | 9.805351 | 10.76455 | 9.394468 | 8.797028 | 9.972756 | 10.30552 | 0.111    | -0.324  | 0.003007 | 0.000556 | 2.616276 | 12 |
| 6532_at   | YDL066W | IDP1   | 9.423873 | 9.5958    | 9.325019 | 9.411754 | 9.065228  | 9.481924 | 9.166397  | 9.364905 | 9.478601 | 8.559036 | 9.227809 | 9.906473 | 8.750224 | 8.389797 | 8.812452 | 9.250266 | -0.196   | -0.058  | 0.0185   | 0.002676 | 1.679268 | 16 |
| 6533_at   | YDL065C | PEX19  | 6.783962 | 7.222996  | 7.335173 | 7.179128 | 7.267628  | 6.827591 | 7.886843  | 7.498167 | 7.00951  | 8.028454 | 7.207623 | 7.551258 | 7.251272 | 7.125422 | 7.504007 | 7.460078 | 0.0838   | -0.0715 | 0.252    | 0.027464 | 1.360295 | 13 |
| 6534_at   | YDL064W | UBC9   | 7.786194 | 7.650035  | 8.391148 | 7.763051 | 7.730992  | 7.799342 | 7.220688  | 7.288806 | 7.480752 | 7.430283 | 7.322245 | 7.537428 | 7.789485 | 7.698081 | 7.642115 | 7.423315 | -0.0688  | 0.114   | 0.0172   | 0.0025   | 1.470806 | 13 |
| 6535_at   | YDL063C |        | 4.530906 | 4.429005  | 5.189184 | 4.040104 | 4.049587  | 3.720603 | 3.975162  | 4.005267 | 3.610201 | 3.748111 | 3.43381  | 3.376826 | 3.446039 | 3.045052 | 3.253736 | 3.601454 | -0.372   | 0.102   | 0.000018 | 7.51E-06 | 2.682265 | 16 |
| 6536_at   | YDL062W |        | 3.564583 | 3.405838  | 4.910956 | 3.442939 | 3.537995  | 3.581673 | 3.551587  | 3.400088 | 3.473759 | 3.642115 | 3.656937 | 3.464248 | 3.455168 | 3.230194 | 3.340391 | 3.433839 | -0.139   | 0.0568  | 0.155    | 0.017784 | 1.445023 | 16 |
| 6537_f_at | YDL061C | RPS29B | 11.02563 | 11.05248  | 11.46268 | 10.76366 | 10.631971 | 10.37995 | 10.872398 | 10.235   | 10.31918 | 9.649113 | 9.869819 | 10.40544 | 9.77735  | 8.941699 | 9.517346 | 10.11305 | -0.481   | 0.0507  | 8.07E-05 | 2.56E-05 | 3.483722 | 18 |
| 6538_at   | YDL060W | TSR1   | 8.394089 | 8.491406  | 8.196773 | 7.563245 | 7.850821  | 7.356039 | 7.647756  | 7.624414 | 7.057055 | 7.085306 | 6.900022 | 6.444201 | 6.787105 | 5.934919 | 6.391211 | 7.050707 | -0.525   | 0.0863  | 3.63E-06 | 2.21E-06 | 4.024645 | 18 |
| 6539_at   | YDL059C | RAD59  | 8.068541 | 8.195111  | 7.983756 | 8.310846 | 8.05642   | 7.962671 | 8.48948   | 8.030061 | 7.929853 | 8.76349  | 8.017757 | 7.235289 | 6.765291 | 7.682675 | 7.299059 | 8.087448 | -0.165   | -0.0649 | 0.07     | 0.008782 | 1.568888 | 16 |
| 6540_at   | YDL058W | USO1   | 5.252401 | 5.469496  | 4.855248 | 5.12214  | 5.208887  | 5.238408 | 5.351226  | 4.888626 | 4.927376 | 5.407879 | 5.106181 | 5.314684 | 5.727522 | 5.621689 | 5.431138 | 5.185346 | 0.111    | 0.0597  | 0.0147   | 0.002185 | 1.3959   | 13 |
| 6541_at   | YDL057W |        | 6.652673 | 6.729303  | 7.061765 | 7.091793 | 7.053224  | 7.18797  | 7.006412  | 6.623582 | 6.986736 | 6.348796 | 6.256108 | 6.410723 | 6.010995 | 5.939038 | 5.594874 | 6.662845 | -0.296   | -0.0927 | 8.29E-05 | 2.61E-05 | 2.191301 | 15 |
| 6542_at   | YDL056W | MBP1   | 5.666522 | 5.940829  | 6.144781 | 5.891581 | 5.634342  | 6.21683  | 6.048661  | 5.636691 | 5.760948 | 5.925007 | 5.779224 | 6.189948 | 5.721949 | 6.041589 | 5.585857 | 5.89636  | -0.0241  | -0.0131 | 0.803    | 0.077984 | 1.075544 | 13 |
| 6543_at   | YDL055C | PSA1   | 11.80729 | 11.81721  | 11.46776 | 11.37823 | 11.48532  | 11.50774 | 10.89521  | 10.49419 | 10.74978 | 10.18554 | 10.16042 | 10.20061 | 9.420956 | 10.41418 | 10.15336 | 10.54139 | -0.491   | 0.0926  | 3.69E-05 | 1.35E-05 | 3.676441 | 18 |
| 6544_at   | YDL054C | MCH1   | 6.743388 | 6.520741  | 6.109494 | 6.900098 | 6.764696  | 6.751713 | 7.738427  | 7.148849 | 7.246433 | 8.597303 | 8.273302 | 8.579245 | 8.671274 | 8.807131 | 8.758821 | 7.861105 | 0.67     | -0.0811 | 2.16E-06 | 1.49E-06 | 5.910481 | 6  |
| 6545_at   | YDL053C | PBP4   | 8.480565 | 8.353585  | 8.340595 | 8.477606 | 8.452933  | 8.587881 | 8.651024  | 8.749419 | 8.878451 | 9.362676 | 9.148255 | 9.39048  | 9.835574 | 9.144693 | 9.162376 | 8.985414 | 0.225    | -0.0741 | 0.000278 | 7.15E-05 | 1.816978 | 9  |
| 6546_at   | YDL052C | SLC1   | 8.879643 | 8.879604  | 8.817696 | 8.534784 | 8.464884  | 8.541948 | 8.175665  | 7.922633 | 8.172499 | 7.934695 | 7.939319 | 8.394766 | 8.762345 | 8.961706 | 8.113388 | 8.107418 | -0.0178  | 0.21    | 3.78E-05 | 1.37E-05 | 1.710748 | 13 |
| 6547_at   | YDL051W | LHP1   | 7.988656 | 8.183677  | 8.232512 | 7.278389 | 7.245923  | 7.04222  | 6.842949  | 7.042144 | 6.568514 | 6.611653 | 6.56582  | 6.480635 | 6.265163 | 6.289141 | 5.84562  | 6.606944 | -0.505   | 0.143   | 4.22E-08 | 9.75E-08 | 3.817205 | 18 |
| 6548_at   | YDL050C |        | 6.166852 | 6.473883  | 5.586405 | 6.020419 | 5.734643  | 5.803117 | 5.850184  | 5.695313 | 5.519799 | 5.154326 | 5.520744 | 4.9834   | 4.77781  | 5.740128 | 5.411218 | 5.427496 | -0.164   | 0.107   | 0.00079  | 0.001387 | 1.685631 | 14 |
| 6549_at   | YDL049C | KNH3   | 6.15605  | 5.906939  | 5.397203 | 5.650218 | 5.687958  | 5.308494 | 5.033193  | 5.324459 | 5.458126 | 4.68251  | 4.808583 | 4.751369 | 7.225781 | 6.102862 | 6.491827 | 5.084495 | 0.123    | 0.319   | 0.00192  | 0.000373 | 2.574091 | 8  |
| 6550_at   | YDL091C | UBX3   | 6.745689 | 6.896615  | 7.341969 | 7.095302 | 7.032002  | 6.778787 | 7.157935  | 6.081567 | 7.034785 | 6.859136 | 6.907782 | 7.245069 | 6.311677 | 6.133366 | 6.336284 | 7.01359  | -0.174   | -0.108  | 0.000228 | 6.04E-05 | 1.739573 | 15 |
| 6551_at   | YDL090C | RAM1   | 6.763163 | 6.681685  | 6.75989  | 6.788865 | 6.693162  | 6.36107  | 6.483208  | 6.226012 | 6.788927 | 6.318622 | 6.406415 | 6.015775 | 5.389334 | 5.775487 | 5.532135 | 6.368661 | -0.305   | -0.0595 | 8.14E-06 | 4.05E-06 | 2.2436   | 16 |
| 6552_at   | YDL089W |        | 6.886185 | 7.001566  | 7.078034 | 7.153394 | 7.043167  | 7.147354 | 7.304684  | 6.783316 | 7.421863 | 7.252013 | 7.259909 | 7.129874 | 7.0524   | 7.6174   | 7.328262 | 7.201577 | 0.0838   | -0.0127 | 0.148    | 0.017055 | 1.248876 | 13 |
| 6553_at   | YDL088C | ASM4   | 6.501537 | 6.783425  | 5.881368 | 6.436379 | 6.367771  | 6.312732 | 6.614151  | 6.437483 | 6.584045 | 7.015446 | 6.845858 | 6.572935 | 6.855741 | 7.593829 | 7.03758  | 6.64735  | 0.218    | 0.0325  | 0.00493  | 0.000844 | 1.781429 | 13 |
| 6554_at   | YDL087C | LUC7   | 4.85178  | 4.698123  | 3.994618 | 4.410504 | 4.27903   | 4.645591 | 4.405537  | 4.363479 | 4.500562 | 4.79644  | 5.045867 | 4.583255 | 4.292976 | 4.374868 | 4.115492 | 4.761182 | -0.0397  | -0.108  | 0.0787   | 0.009709 | 1.732035 | 12 |
| 6555_at   | YDL086W |        | 8.855391 | 9.353731  | 9.319242 | 11.37214 | 11.1396   | 11.10986 | 11.15073  | 11.22757 | 11.43671 | 11.62884 | 11.70469 | 11.09342 | 9.957651 | 9.969527 | 9.64139  | 11.73617 | 0.0974   | -0.651  | 3.77E-08 | 9.00E-08 | 5.65108  | 11 |
| 6556_at   | YDL085W | NDE2   | 5.460324 | 5.272757  | 4.838293 | 5.748323 | 5.447849  | 5.87017  | 5.996531  | 6.02476  | 5.931054 | 5.733099 | 5.966252 | 6.106633 | 5.81402  | 6.404375 | 6.11211  | 5.981832 | 0.225    | -0.0905 | 0.0009   | 0.000195 | 1.815722 | 9  |
| 6557_at   | YDL084W | SUB2   | 9.968742 | 9.982927  | 9.891068 | 9.396425 | 9.317603  | 9.551029 | 9.005255  | 8.715266 | 9.128023 | 8.802194 | 8.710008 | 8.979511 | 8.735814 | 8.901408 | 8.774349 | 8.888442 | -0.301   | 0.136   | 1.21E-06 | 9.77E-07 | 2.253212 | 14 |
| 6558_f_at | YDL083C | RPS16B | 10.98923 | 11.28421  | 11.68818 | 10.74661 | 10.82462  | 11.32544 | 9.729936  | 9.794252 | 10.09938 | 8.916401 | 8.879817 | 9.790577 | 9.392877 | 9.016775 | 8.842472 | 9.665548 | -0.729   | 0.113   | 0.000016 | 6.84E-06 | 6.906625 | 18 |
| 6559_f_at | YDL083C | RPS16B | 11.26171 | 11.371115 | 11.58424 | 11.05457 | 11.01573  | 11.50769 | 10.38109  | 10.52466 | 10.33116 | 9.659216 | 9.775096 | 10.00512 | 9.898366 | 9.229647 | 9.260196 | 10.2092  | 0.2899   | 0.0289  | 5.19E-07 | 5.28E-07 | 5.928515 | 18 |
| 6560_at   | YDL082W | RPL13A | 11.50499 | 11.327    | 11.30139 | 10.64284 | 10.56145  | 10.49223 | 9.931826  | 10.36329 | 9.75023  | 9.864578 | 9.800665 | 8.834524 | 6.384412 | 6.95882  | 6.794439 | 9.419876 | -1.23    | -0.1    | 3.26E-12 | 6.50E-10 | 25.79911 | 10 |
| 6561_at   | YDL081C | RPP1A  | 11.79104 | 11.86866  | 11.98352 | 11.65248 | 11.59561  | 11.93553 | 11.12699  | 11.52172 | 11.19404 | 10.67915 |          |          |          |          |          |          |          |         |          |          |          |    |



|         |               |          |          |          |          |          |          |          |          |          |          |          |          |           |          |          |          |          |          |          |          |          |    |
|---------|---------------|----------|----------|----------|----------|----------|----------|----------|----------|----------|----------|----------|----------|-----------|----------|----------|----------|----------|----------|----------|----------|----------|----|
| 6593_at | YDL093W PMT5  | 7.107754 | 7.098619 | 6.990417 | 6.245682 | 6.314801 | 6.308876 | 6.385678 | 5.966214 | 6.056352 | 5.731483 | 6.160558 | 6.173315 | 6.374414  | 5.625433 | 5.962087 | 5.994144 | -0.263   | 0.143    | 0.000071 | 2.31E-05 | 2.159288 | 14 |
| 6594_at | YDL092W SRP14 | 6.721337 | 7.574193 | 8.251259 | 7.302277 | 7.318494 | 6.275913 | 6.90219  | 6.892215 | 6.856306 | 6.87556  | 6.39487  | 6.559579 | 5.88972   | 6.058559 | 5.669475 | 6.724826 | -0.578   | -0.0115  | 8.11E-07 | 7.19E-07 | 4.634129 | 18 |
| 6595_at | YDL133W       | 6.755811 | 6.823396 | 6.397946 | 6.969913 | 6.840129 | 6.49319  | 6.171986 | 6.730898 | 6.574759 | 6.73097  | 6.577097 | 6.672688 | 6.448135  | 6.585498 | 6.08972  | 6.813939 | -0.086   | -0.0816  | 0.0524   | 0.006759 | 1.399066 | 12 |
| 6596_at | YDL132W CDC53 | 6.563568 | 6.666091 | 6.669733 | 6.537347 | 6.502389 | 6.083456 | 6.601348 | 6.534992 | 6.116327 | 6.743479 | 6.373515 | 6.740307 | 6.6860934 | 6.834548 | 6.429469 | 6.469553 | 0.0425   | 0.0521   | 0.227    | 0.024961 | 1.213058 | 13 |
| 6597_at | YDL131W LYS21 | 10.21217 | 10.6928  | 11.06928 | 10.47904 | 10.59932 | 10.76956 | 10.16881 | 9.892799 | 10.24912 | 8.588072 | 8.273842 | 9.75679  | 8.650903  | 9.12682  | 9.366734 | 9.672193 | -0.508   | 0.0615   | 0.000924 | 0.000199 | 3.848845 | 18 |
| 6598_at | YDL130W-STF1  | 9.276122 | 9.21095  | 9.636465 | 10.74988 | 10.57337 | 10.29469 | 10.85296 | 10.85981 | 10.58697 | 10.02347 | 10.87293 | 11.07223 | 10.22699  | 10.07634 | 10.01055 | 10.96896 | 0.185    | -0.336   | 0.05E-08 | 1.21E-07 | 3.033673 | 10 |
| 6599_at | YDL130W RPP1B | 11.4898  | 11.73141 | 11.85765 | 11.17759 | 11.14998 | 11.30175 | 10.51701 | 10.54366 | 10.24179 | 9.394133 | 9.486067 | 10.05557 | 8.402028  | 9.071574 | 8.791822 | 10.09843 | -0.804   | 0.043    | 7.24E-08 | 1.38E-07 | 8.429256 | 18 |
| 6600_at | YDL130W RPP1B | 12.91421 | 12.96981 | 12.90254 | 12.65156 | 12.55788 | 12.54029 | 12.24729 | 12.10971 | 11.65537 | 11.2659  | 11.1894  | 11.38954 | 10.61609  | 10.97417 | 10.73171 | 11.69626 | -0.605   | 0.0496   | 1.24E-07 | 1.98E-07 | 4.966651 | 18 |
| 6601_at | YDL129W       | 5.471831 | 5.230202 | 5.981797 | 5.309233 | 5.096223 | 5.331966 | 5.159231 | 5.643227 | 5.22469  | 5.523761 | 5.452635 | 5.210646 | 5.946907  | 5.165518 | 5.30244  | 5.308547 | -0.00578 | 0.054    | 0.516    | 0.05224  | 1.150144 | 13 |
| 6602_at | YDL128W VCX1  | 7.970514 | 7.732291 | 7.509204 | 8.418953 | 8.214472 | 7.457489 | 8.717056 | 8.508379 | 8.274307 | 7.966912 | 7.826364 | 8.072495 | 6.987184  | 6.904437 | 6.95138  | 8.196043 | -0.213   | -0.236   | 0.000158 | 4.46E-05 | 2.486693 | 15 |
| 6603_at | YDL127W PCL2  | 5.981258 | 6.113423 | 6.524823 | 5.4653   | 6.637044 | 5.578501 | 6.120665 | 5.339696 | 5.217157 | 6.505368 | 5.420874 | 5.288559 | 5.291603  | 5.304097 | 5.084892 | 5.639307 | -0.231   | 0.0203   | 0.0881   | 0.010765 | 1.843889 | 16 |
| 6604_at | YDL126C CDC48 | 9.568957 | 9.345857 | 9.671387 | 9.670898 | 9.681142 | 9.710557 | 10.03943 | 9.702778 | 10.0866  | 10.18144 | 9.876092 | 10.20739 | 10.23387  | 9.71481  | 10.30957 | 9.994347 | 0.158    | -0.0538  | 0.00492  | 0.000844 | 1.519168 | 13 |
| 6605_at | YDL125C HNT1  | 10.95206 | 10.68953 | 11.02347 | 10.7991  | 10.65507 | 10.9065  | 10.62814 | 10.34882 | 10.7729  | 10.73513 | 10.53904 | 10.66814 | 10.52227  | 10.1961  | 10.5812  | 10.62579 | -0.112   | 0.0101   | 0.0213   | 0.003023 | 1.347431 | 16 |
| 6606_at | YDL125C HNT1  | 12.18938 | 11.63763 | 11.5309  | 11.89807 | 11.69985 | 11.40481 | 12.00918 | 11.79013 | 11.57337 | 11.96132 | 11.86714 | 11.34496 | 11.30526  | 10.8593  | 11.15813 | 11.71197 | -0.158   | -0.0757  | 0.0135   | 0.002019 | 1.579279 | 16 |
| 6607_at | YDL124W       | 6.920868 | 6.989895 | 7.738509 | 8.999339 | 8.600746 | 8.670787 | 8.676746 | 8.277714 | 9.009773 | 8.240717 | 8.42566  | 9.063248 | 8.293835  | 7.752612 | 8.771732 | 8.906424 | 0.208    | -0.309   | 0.0017   | 0.000335 | 2.952478 | 10 |
| 6608_at | YDL123W SNA4  | 7.629782 | 7.160942 | 6.633778 | 7.647228 | 7.824868 | 7.699689 | 8.272658 | 8.295802 | 8.752943 | 9.467692 | 9.059331 | 8.957604 | 8.745105  | 9.27065  | 9.53699  | 8.821381 | 0.576    | -0.189   | 2.65E-05 | 1.03E-05 | 4.608964 | 7  |
| 6609_at | YDL122W UBP1  | 8.959283 | 9.026858 | 8.275148 | 8.27919  | 8.472764 | 8.319991 | 8.956726 | 8.769665 | 8.643203 | 9.50761  | 8.948807 | 8.64082  | 9.721159  | 9.709535 | 9.170188 | 8.777973 | 0.239    | 0.0934   | 0.00517  | 0.000879 | 1.918384 | 8  |
| 6610_at | YDL121C       | 6.653986 | 6.623121 | 6.890762 | 6.954799 | 6.718688 | 6.196385 | 6.823121 | 5.538685 | 5.742347 | 5.713782 | 6.573773 | 5.056304 | 4.831246  | 5.159242 | 4.585475 | 5.561277 | -0.476   | 0.0632   | 1.54E-06 | 1.18E-06 | 3.532707 | 18 |
| 6611_at | YDL120W YFH1  | 7.326613 | 7.461962 | 7.715248 | 7.031709 | 7.807519 | 7.450278 | 8.518104 | 7.327671 | 7.372773 | 7.993946 | 7.427796 | 7.398368 | 7.470758  | 7.523946 | 7.430763 | 7.532874 | 0.00812  | -0.0144  | 0.938    | 0.08975  | 1.049128 | 13 |
| 6612_at | YDL119C       | 6.667135 | 6.387831 | 6.037057 | 6.417196 | 6.575192 | 6.258242 | 6.741119 | 6.393668 | 6.687779 | 6.844312 | 6.488107 | 6.126791 | 5.604304  | 5.791953 | 5.559251 | 6.531099 | -0.169   | -0.141   | 0.000692 | 0.000154 | 1.855145 | 15 |
| 6613_at | YDL118W       | 6.03803  | 5.753543 | 5.290402 | 5.309978 | 5.298607 | 5.580425 | 5.652912 | 5.440131 | 5.633487 | 5.650111 | 5.489678 | 4.73968  | 5.324161  | 5.483009 | 5.179497 | 5.373879 | -0.0968  | 0.0361   | 0.235    | 0.025751 | 1.925666 | 13 |
| 6614_at | YDL117W CYK3  | 6.944556 | 6.9738   | 6.315402 | 6.731849 | 6.573557 | 6.453798 | 6.734811 | 6.644662 | 6.375299 | 6.773606 | 6.601333 | 6.434658 | 6.049336  | 6.710198 | 6.003421 | 6.564416 | -0.112   | -0.0197  | 0.116    | 0.013778 | 1.346372 | 16 |
| 6615_at | YDL116W NUP84 | 7.483106 | 7.498807 | 6.824394 | 6.96933  | 6.897551 | 6.895816 | 6.944553 | 6.78663  | 6.411076 | 6.500854 | 6.520845 | 6.058269 | 5.951945  | 6.559321 | 5.858251 | 6.528944 | -0.31    | 0.0483   | 0.000393 | 9.57E-05 | 2.275661 | 16 |
| 6616_at | YDL115C IWR1  | 5.790556 | 5.389444 | 5.119358 | 5.780197 | 5.790622 | 5.525141 | 6.107187 | 6.098793 | 6.830588 | 7.052257 | 6.840077 | 6.416335 | 7.384999  | 7.378451 | 7.19254  | 6.312727 | 0.519    | 0.0133   | 7.52E-07 | 6.77E-07 | 3.955538 | 7  |
| 6617_at | YDL114W       | 4.384928 | 4.020679 | 4.122715 | 4.075768 | 3.986661 | 4.48689  | 4.239576 | 4.757211 | 4.470885 | 4.591407 | 4.901217 | 4.437198 | 4.638623  | 4.994849 | 5.200771 | 4.512029 | 0.216    | 0.00954  | 0.00395  | 0.000694 | 1.777398 | 13 |
| 6618_at | YDL157C       | 10.03696 | 9.869977 | 9.697399 | 9.940994 | 9.988845 | 10.09544 | 9.980147 | 10.02162 | 9.970929 | 9.984209 | 9.957677 | 9.891858 | 8.680603  | 8.241424 | 8.614877 | 9.952073 | -0.318   | -0.203   | 1.49E-07 | 2.22E-07 | 2.773118 | 15 |
| 6619_at | YDL156W       | 4.250171 | 4.09381  | 5.733502 | 4.828743 | 4.722815 | 4.677644 | 4.492686 | 5.29065  | 5.090746 | 4.525723 | 4.980953 | 4.434781 | 4.094483  | 3.48134  | 4.152645 | 4.778227 | -0.202   | -0.131   | 0.0373   | 0.005001 | 1.918576 | 15 |
| 6620_at | YDL155W CLB3  | 6.421586 | 6.576488 | 6.813479 | 6.559474 | 6.118581 | 6.122997 | 6.495605 | 6.660445 | 6.124255 | 6.511146 | 6.460989 | 6.21613  | 6.1523    | 5.846625 | 6.056635 | 6.332161 | -0.127   | -0.0101  | 0.0428   | 0.005648 | 1.939627 | 16 |
| 6621_at | YDL154W MSH5  | 4.284514 | 4.250495 | 3.465539 | 3.462025 | 4.502407 | 4.492145 | 4.773278 | 4.536424 | 4.709489 | 4.693734 | 4.795207 | 4.63735  | 4.61218   | 4.492313 | 4.467114 | 4.716971 | 0.133    | -0.125   | 0.00216  | 0.000412 | 1.676091 | 9  |
| 6622_at | YDL153C SAS10 | 8.892732 | 8.700576 | 8.056413 | 7.797605 | 8.305041 | 7.548824 | 8.478918 | 8.197275 | 7.615056 | 8.173873 | 7.694234 | 6.875535 | 7.434715  | 8.00909  | 7.604006 | 7.781389 | -0.257   | 0.0546   | 0.0897   | 0.01093  | 1.974771 | 16 |
| 6623_at | YDL152W       | 4.896761 | 4.616611 | 3.881513 | 4.668847 | 4.350457 | 4.571735 | 3.888167 | 4.020663 | 4.632677 | 4.25251  | 4.392607 | 3.856293 | 4.07862   | 4.232056 | 3.510972 | 4.233033 | -0.147   | -0.00493 | 0.153    | 0.01762  | 1.477194 | 16 |
| 6624_at | YDL151C BUD30 | 5.44729  | 5.412308 | 5.153711 | 5.522226 | 5.42762  | 5.609245 | 4.982744 | 5.002782 | 5.269088 | 4.965367 | 5.236269 | 4.982947 | 5.18427   | 4.969317 | 4.91445  | 5.158274 | -0.107   | 0.0116   | 0.0664   | 0.008371 | 1.327382 | 13 |
| 6625_at | YDL150W RPS53 | 7.46397  | 7.765162 | 7.97146  | 6.755443 | 6.876927 | 6.735124 | 6.637528 | 6.683566 | 6.302756 | 6.660345 | 6.371441 | 5.715593 | 6.111158  | 6.480842 | 5.692833 | 6.300997 | -0.454   | 0.143    | 3.88E-05 | 1.26E-05 | 3.331552 | 14 |
| 6626_at | YDL149W ATG9  | 8.337179 | 4.011279 | 3.629189 | 4.073006 | 3.901496 | 4.06293  | 4.148448 | 4.139264 | 4.210391 | 4.310396 | 4.457132 | 4.452016 | 4.903384  | 4.974964 | 4.866512 | 4.27647  | 0.283    | 0.253    | 2.81E-08 | 7.41E-08 | 2.117195 | 7  |
| 6627_at | YDL148C NOP14 | 5.780937 | 5.48796  | 4.557122 | 4.449455 | 4.68591  | 4.129177 | 4.882335 | 4.680963 | 4.29518  | 4.796645 | 4.12068  | 3.419425 | 3.787715  | 4.20213  | 3.138388 | 4.21916  | -0.392   | 0.0701   | 0.00589  | 0.000982 | 2.824199 | 16 |
| 6628_at | YDL147W RPN5  | 8.32685  | 8.23638  | 8.227523 | 8.090372 | 8.062425 | 8.049355 | 8.444631 | 8.355781 | 8.354009 | 8.764917 | 8.515984 | 8.44458  | 8.054368  | 8.260432 | 8.312984 | 8.389613 | 0.026    | -0.0484  | 0.305    | 0.032618 | 1.172341 | 13 |
| 6629_at | YDL146W LDB17 | 5.283756 | 5.172997 | 4.791273 | 5.415927 | 5.332787 | 5.297629 | 4.925099 | 5.242021 | 5.317981 | 5.009087 | 5.13432  | 5.138441 | 6.963088  | 6.285278 | 6.30343  | 5.224758 | 0.32     | 0.166    | 0.00012  | 3.55E-05 | 1.952161 | 8  |
| 6630_at | YDL145C COP1  | 9.328395 | 9.329024 | 8.783214 | 8.713937 | 8.57955  | 8.443111 | 8.767579 | 8.68484  | 8.404736 | 8.32386  | 8.513505 | 8.215904 | 7.991904  | 8.198465 | 7.987864 | 8.397605 | -0.27    | 0.0534   | 5.59E-05 | 1.89E-05 | 2.045299 | 16 |
| 6631_at | YDL144C       | 6.399043 | 6.404354 | 6.315316 | 6.670096 | 6.460823 | 6.612416 | 6.504213 | 6.64154  | 6.687935 | 6.434122 | 6.68154  | 6.687935 | 6.108442  | 6.108442 | 6.108442 | 6.44886  | -0.203   | -0.117   | 3.03E-06 | 1.93E-06 | 1.870288 | 15 |
| 6632_at | YDL143W CCD1  | 6.894115 | 6.289937 | 9.428704 | 8.884557 | 8.901245 | 8.768297 | 8.605788 | 8.664536 | 8.240755 | 8.272243 | 8.421071 | 8.43367  | 7.584766  | 7.69976  | 7.89947  | 8.443592 | -0.362   | -0.00243 | 1.21E-05 | 5.53E-06 | 2.613732 | 16 |
| 6633_at | YDL142C CRT4  | 6.452693 | 6.447026 | 5.256093 | 6.509761 | 6.551093 | 6.48897  | 6.521    | 6.89847  | 6.663945 | 6.689941 | 6.684161 | 6.604158 | 6.220325  | 6.783813 | 7.10848  | 6.731867 | 0.313    | -0.00267 | 0.0142   | 0.002108 | 2.291195 | 7  |
| 6634_at | YDL141W BPL1  | 4.017582 | 4.004775 | 3.414337 |          |          |          |          |          |          |          |          |          |           |          |          |          |          |          |          |          |          |    |

|           |         |        |           |          |          |          |          |          |          |          |          |          |          |           |          |          |          |          |          |          |           |          |          |    |
|-----------|---------|--------|-----------|----------|----------|----------|----------|----------|----------|----------|----------|----------|----------|-----------|----------|----------|----------|----------|----------|----------|-----------|----------|----------|----|
| 6665_at   | YDL198C | GGC1   | 9.102858  | 9.128811 | 8.915853 | 9.353183 | 9.332058 | 8.739217 | 9.607249 | 9.293091 | 9.019864 | 9.65835  | 9.307316 | 9.630682  | 8.579879 | 8.449553 | 8.411836 | 9.379476 | -0.106   | -0.174   | 0.0021    | 0.000404 | 1.790333 | 12 |
| 6666_at   | YDL197C | ASF2   | 5.362416  | 5.568653 | 5.362857 | 5.607844 | 5.633106 | 5.415131 | 6.265115 | 5.814817 | 5.50923  | 6.15039  | 5.991792 | 5.920272  | 5.743449 | 6.079932 | 5.966693 | 5.90331  | 0.148    | -0.0651  | 0.00839   | 0.001337 | 1.485589 | 13 |
| 6667_at   | YDL196W |        | 5.097042  | 5.044565 | 5.461087 | 5.140159 | 5.363219 | 5.212447 | 5.507056 | 4.899448 | 5.089778 | 5.074621 | 5.024385 | 4.884214  | 4.873113 | 4.962743 | 4.918967 | 5.040373 | -0.0839  | 0.00776  | 0.0382    | 0.005099 | 1.249024 | 13 |
| 6668_at   | YDL195W | SEC31  | 8.7117851 | 8.527839 | 8.180608 | 8.636774 | 8.243953 | 8.437713 | 8.416257 | 8.609324 | 8.480001 | 8.131491 | 8.63927  | 8.894614  | 8.798209 | 8.495533 | 8.555049 | 8.513159 | 0.0424   | 0.00793  | 0.622     | 0.061963 | 1.119038 | 13 |
| 6669_at   | YDL194W | SNF3   | 4.024855  | 4.148538 | 5.168776 | 4.467899 | 4.389966 | 4.273957 | 4.676999 | 4.529325 | 4.245504 | 4.705473 | 4.433669 | 4.823757  | 4.316734 | 4.335042 | 4.313103 | 4.530578 | -0.00708 | -0.0434  | 0.676     | 0.066828 | 1.118925 | 13 |
| 6670_at   | YDL193W | NUS1   | 6.592978  | 6.594716 | 6.743369 | 6.155758 | 6.359152 | 5.951922 | 6.304281 | 6.290485 | 5.763955 | 5.869063 | 5.793401 | 5.4895152 | 5.408979 | 5.361205 | 5.436104 | 5.528841 | -0.312   | 0.0232   | 3.222e-06 | 2.02E-06 | 2.287262 | 16 |
| 6671_at   | YDL192W | ARF1   | 12.9916   | 13.01086 | 12.90231 | 12.80433 | 12.86957 | 12.6999  | 12.76733 | 12.59258 | 12.36047 | 12.40628 | 12.33638 | 12.20846  | 11.39251 | 11.51779 | 11.49357 | 12.44532 | -0.389   | -0.0616  | 3.17E-09  | 1.90E-08 | 2.803133 | 16 |
| 6672_s_at | YDL191W | RPL35A | 10.85735  | 11.1173  | 11.57665 | 10.73955 | 10.83764 | 11.16335 | 10.28002 | 10.22347 | 10.33894 | 9.970143 | 9.618882 | 10.04277  | 9.047479 | 8.736352 | 9.369281 | 10.13477 | -0.575   | 0.000489 | 1.41E-06  | 1.11E-06 | 4.591028 | 18 |
| 6673_at   | YDL190C | UFD2   | 7.82139   | 7.94205  | 7.798917 | 7.724502 | 7.618889 | 7.440098 | 7.763736 | 7.624405 | 7.425901 | 6.993782 | 7.364185 | 7.282428  | 6.33194  | 6.249449 | 6.324848 | 7.365482 | -0.399   | -0.0801  | 8.59E-09  | 3.38E-08 | 2.876285 | 16 |
| 6674_at   | YDL189W | RBS1   | 3.993744  | 3.52736  | 4.933108 | 3.215244 | 3.326734 | 3.173896 | 3.331348 | 3.285195 | 3.350248 | 2.978149 | 2.980759 | 2.891073  | 3.073874 | 2.809047 | 3.115364 | 3.005336 | -0.287   | 0.153    | 0.000873  | 0.000189 | 2.296201 | 14 |
| 6675_at   | YDL189W | RBS1   | 6.414993  | 6.643714 | 7.379783 | 6.236674 | 5.8916   | 6.020088 | 5.254471 | 5.384631 | 5.427727 | 5.19803  | 5.194957 | 5.312236  | 5.243221 | 4.899    | 5.175226 | 5.293718 | -0.444   | 0.185    | 1.09E-05  | 5.08E-06 | 3.246996 | 14 |
| 6676_at   | YDL188C | PPH22  | 8.551612  | 8.441974 | 8.525783 | 8.942513 | 8.756903 | 8.881276 | 8.426585 | 8.3242   | 8.635606 | 8.254567 | 8.250546 | 9.063063  | 8.606625 | 7.926225 | 8.597372 | 8.599631 | -0.0543  | -0.038   | 0.48      | 0.049005 | 1.198781 | 13 |
| 6677_at   | YDL187C |        | 5.008336  | 5.069874 | 5.810474 | 4.984655 | 4.686731 | 4.645452 | 4.22642  | 4.390015 | 4.328051 | 4.27556  | 4.167802 | 3.70791   | 4.065633 | 4.107288 | 3.928055 | 4.186032 | -0.342   | 0.134    | 0.000053  | 1.82E-05 | 2.474412 | 14 |
| 6678_at   | YDL186W |        | 3.745643  | 3.831071 | 3.230557 | 3.640489 | 3.588053 | 3.912309 | 3.832924 | 3.851325 | 3.962727 | 3.8182   | 3.801866 | 3.601787  | 3.35348  | 3.596124 | 3.611488 | 3.801953 | -0.0241  | -0.0666  | 0.0912    | 0.011091 | 1.214642 | 13 |
| 6679_at   | YDL185W | TFP1   | 10.00455  | 10.11011 | 9.888551 | 9.612388 | 9.801964 | 9.845011 | 10.06193 | 9.116569 | 9.72176  | 9.59649  | 9.43878  | 9.586297  | 8.482784 | 9.287796 | 9.057311 | 9.561219 | -0.262   | -0.0256  | 0.00149   | 0.000299 | 2.005082 | 16 |
| 6680_s_at | YDL184C | RPL41A | 7.086794  | 7.690316 | 7.123077 | 6.261179 | 6.436191 | 6.965529 | 6.14767  | 6.228022 | 6.116706 | 5.808631 | 5.13363  | 5.352462  | 4.832417 | 4.933198 | 4.941141 | 5.656295 | -0.667   | 0.127    | 1.01E-07  | 1.71E-07 | 5.861409 | 18 |
| 6681_at   | YDL183C |        | 5.399573  | 5.351086 | 4.771289 | 5.484005 | 5.521131 | 5.385588 | 5.619028 | 5.499268 | 5.469429 | 5.785401 | 5.685597 | 5.797177  | 6.048235 | 6.252648 | 6.218981 | 5.674862 | 0.257    | 0.00301  | 1.32E-05  | 5.87E-06 | 1.974465 | 7  |
| 6682_at   | YDL182W | LYS20  | 11.54569  | 11.70936 | 12.28263 | 11.22431 | 11.29149 | 11.35625 | 10.61631 | 10.22827 | 11.42194 | 11.18234 | 10.90742 | 10.92968  | 11.51638 | 12.07401 | 11.9974  | 10.89101 | 0.00399  | 0.267    | 0.00242   | 0.000454 | 1.913039 | 14 |
| 6683_g_at | YDL182W | LYS20  | 11.41107  | 11.5741  | 11.47743 | 10.836   | 10.89758 | 11.0797  | 10.67457 | 10.25868 | 11.18576 | 10.4394  | 10.20851 | 10.19674  | 10.26592 | 10.58681 | 10.83561 | 10.46998 | -0.262   | 0.155    | 0.000186  | 5.12E-05 | 2.127316 | 14 |
| 6684_at   | YDL181W | INH1   | 6.264968  | 6.284966 | 5.095859 | 5.919211 | 9.244361 | 9.133817 | 9.42527  | 9.133038 | 9.305481 | 9.041279 | 9.101876 | 9.735222  | 7.742643 | 8.069978 | 7.965118 | 9.756685 | 0.43     | -0.765   | 3.23E-06  | 2.02E-06 | 12.70888 | 10 |
| 6685_at   | YDL180W |        | 6.8313    | 6.942842 | 6.330288 | 6.706199 | 6.726099 | 6.695429 | 6.492718 | 6.748785 | 6.489733 | 6.801361 | 6.439673 | 7.723773  | 7.370766 | 6.676621 | 6.66061  | 6.66061  | 0.124    | 0.0834   | 0.00523   | 0.000887 | 1.500315 | 13 |
| 6686_at   | YDL221W |        | 3.744094  | 3.875581 | 5.413091 | 3.966687 | 3.84593  | 4.291889 | 3.835754 | 3.783225 | 3.645538 | 3.931745 | 3.850485 | 3.61486   | 3.720454 | 3.586582 | 3.760299 | 3.771893 | -0.163   | 0.0675   | 0.14      | 0.016298 | 1.540078 | 16 |
| 6687_at   | YDL220C | CDC13  | 6.164514  | 6.468732 | 6.612261 | 6.542107 | 6.138646 | 6.595463 | 6.189191 | 6.335658 | 6.383555 | 6.051231 | 6.591698 | 5.729027  | 6.411842 | 5.742173 | 5.79346  | 6.205737 | -0.174   | 0.0286   | 0.0225    | 0.003177 | 1.586125 | 16 |
| 6688_at   | YDL219W | DTD1   | 7.473088  | 7.387136 | 7.721075 | 7.144878 | 7.348847 | 7.168739 | 6.379415 | 6.570936 | 6.541448 | 5.319865 | 5.671592 | 4.796841  | 4.481439 | 4.232618 | 4.366538 | 5.970554 | -0.9     | 0.0037   | 1.18E-07  | 1.91E-07 | 10.86273 | 18 |
| 6689_at   | YDL219W | DTD1   | 7.448176  | 7.449879 | 7.981985 | 7.223105 | 7.383811 | 7.243331 | 6.377546 | 6.035798 | 6.445796 | 5.101076 | 5.460806 | 4.913198  | 4.563066 | 4.979372 | 4.548825 | 5.837499 | -0.849   | 0.0984   | 1.43E-06  | 1.12E-06 | 9.499025 | 16 |
| 6690_at   | YDL218W |        | 4.754679  | 4.646704 | 3.904144 | 4.384046 | 4.242322 | 4.326084 | 3.964619 | 4.048563 | 4.250986 | 3.962584 | 4.160812 | 3.94416   | 3.676629 | 3.955571 | 4.020627 | 4.071435 | -0.148   | 0.0258   | 0.0219    | 0.003102 | 1.472963 | 16 |
| 6691_at   | YDL217C | TIM22  | 6.929908  | 6.551385 | 6.20985  | 6.648538 | 6.670338 | 6.685358 | 6.826569 | 6.53251  | 6.885661 | 7.174756 | 6.784422 | 6.784329  | 6.989555 | 6.645051 | 6.235795 | 6.814273 | -0.03    | -0.0992  | 0.0519    | 0.006706 | 1.32241  | 12 |
| 6692_at   | YDL216C | RR11   | 3.66274   | 3.462741 | 2.870825 | 3.449146 | 3.10616  | 3.321356 | 2.967587 | 3.034192 | 3.182157 | 3.015167 | 3.063274 | 2.91429   | 2.995277 | 3.091408 | 3.151953 | 3.082996 | -0.049   | 0.0179   | 0.383     | 0.04005  | 1.138454 | 13 |
| 6693_at   | YDL215C | GDH2   | 6.527043  | 6.785835 | 5.387494 | 7.356858 | 7.517092 | 7.502752 | 8.066071 | 7.120586 | 7.841598 | 7.619578 | 7.639556 | 8.151683  | 7.98241  | 7.956797 | 8.114423 | 7.927076 | 0.437    | -0.216   | 0.000199  | 5.41E-05 | 3.403636 | 10 |
| 6694_at   | YDL214C | PRR2   | 4.084298  | 4.084417 | 3.806334 | 5.304625 | 5.050272 | 5.488515 | 5.870262 | 5.400567 | 5.651634 | 4.764181 | 4.276556 | 4.438812  | 5.239324 | 5.276544 | 5.324964 | 5.377116 | 0.228    | -0.192   | 0.0213    | 0.003025 | 2.990202 | 9  |
| 6695_at   | YDL213C | NOP6   | 7.43982   | 7.766618 | 8.046109 | 7.277733 | 7.316634 | 7.235519 | 7.370167 | 7.134429 | 6.967354 | 7.797566 | 7.119964 | 6.846819  | 6.241888 | 6.779896 | 6.804155 | 7.140454 | -0.262   | 0.00694  | 0.00514   | 0.000874 | 2.000203 | 16 |
| 6696_at   | YDL212W | SHR3   | 10.10102  | 10.14382 | 9.539349 | 9.568825 | 9.565603 | 9.370942 | 9.744393 | 9.450095 | 9.479829 | 9.334587 | 9.212203 | 8.861683  | 7.628799 | 7.843499 | 7.516575 | 9.27246  | -0.556   | -0.128   | 7.42E-08  | 1.40E-07 | 4.36842  | 18 |
| 6697_at   | YDL211C |        | 4.962262  | 4.563659 | 3.870805 | 4.379599 | 4.220519 | 4.313171 | 4.524588 | 4.260513 | 4.399206 | 4.799833 | 4.912123 | 4.787418  | 4.370039 | 4.370652 | 4.069593 | 4.580935 | 0.0712   | -0.0724  | 0.158     | 0.018088 | 1.336204 | 13 |
| 6698_at   | YDL210W | UGA4   | 5.550692  | 5.368556 | 5.251635 | 6.864044 | 6.883862 | 6.198139 | 8.850325 | 8.495554 | 9.60924  | 8.456804 | 8.195519 | 8.278716  | 7.319384 | 7.226229 | 6.699015 | 8.52286  | 0.434    | -0.641   | 0.00177   | 0.000347 | 9.474656 | 10 |
| 6699_at   | YDL209C | CWC2   | 6.325843  | 6.14571  | 5.945562 | 6.11908  | 6.135763 | 5.856289 | 6.045716 | 6.35224  | 6.05929  | 6.486731 | 6.163046 | 5.620053  | 6.067521 | 5.963391 | 5.525533 | 6.086249 | -0.0653  | -0.0268  | 0.352     | 0.03703  | 1.197448 | 13 |
| 6700_at   | YDL208W | NHP2   | 11.49765  | 11.45736 | 11.56696 | 10.99542 | 11.101   | 10.80472 | 10.15704 | 10.87733 | 10.34177 | 10.09487 | 10.10927 | 9.67384   | 8.951525 | 9.536315 | 9.266155 | 10.21227 | -0.601   | 0.049    | 2.11E-07  | 2.79E-07 | 4.925121 | 18 |
| 6701_at   | YDL207W | GLE1   | 6.612173  | 6.583572 | 6.063708 | 6.462047 | 6.345517 | 5.989747 | 5.747381 | 6.115839 | 5.647886 | 5.672637 | 5.943517 | 5.994192  | 5.66994  | 5.756806 | 5.663339 | 5.890911 | -0.191   | 0.0485   | 0.00548   | 0.000922 | 1.657924 | 16 |
| 6702_at   | YDL206W |        | 5.0789    | 5.316078 | 4.482719 | 5.845445 | 5.648459 | 5.569818 | 6.220553 | 5.960581 | 6.025117 | 6.406213 | 6.161723 | 6.75862   | 6.689547 | 6.452007 | 6.520158 | 6.280606 | 0.417    | -0.139   | 6.49E-06  | 3.42E-06 | 3.017402 | 7  |
| 6703_at   | YDL205C | HEM3   | 5.599284  | 5.582947 | 4.25137  | 4.944221 | 4.579557 | 4.927136 | 4.753223 | 5.050889 | 4.926032 | 4.635514 | 4.897223 | 4.820359  | 4.687545 | 4.435213 | 4.612068 | 4.774557 | -0.139   | 0.0218   | 0.179     | 0.020241 | 1.446603 | 16 |
| 6704_at   | YDL204W | RTN2   | 4.590435  | 4.25387  | 3.520167 | 6.878518 | 6.34017  | 6.224031 | 7.423689 | 7.28598  | 7.246037 | 8.926653 | 5.274275 | 5.868323  | 4.475559 | 4.688654 | 4.530308 | 6.605922 | -0.0582  | -0.604   | 0.000264  | 0.000489 | 4.578716 | 11 |
| 6705_at   | YDL203C | ACK1   | 6.609732  | 6.466721 | 6.049908 | 6.579176 | 6.440455 | 6.213121 | 6.476707 | 6.379136 | 6.31448  | 6        |          |           |          |          |          |          |          |          |           |          |          |    |

|           |              |       |          |          |          |          |          |          |          |          |           |          |          |          |          |          |          |          |          |          |          |           |          |    |
|-----------|--------------|-------|----------|----------|----------|----------|----------|----------|----------|----------|-----------|----------|----------|----------|----------|----------|----------|----------|----------|----------|----------|-----------|----------|----|
| 6763_at   | YCL008C      | STP22 | 7.08597  | 6.759638 | 6.765719 | 6.635738 | 6.627753 | 6.923086 | 6.638064 | 6.589248 | 6.70189   | 6.971471 | 7.289617 | 7.228395 | 6.504381 | 7.478252 | 7.031127 | 6.881543 | 0.0744   | 0.0119   | 0.446    | 0.04604   | 1.218094 | 13 |
| 6764_g_at | YCL008C      | STP22 | 5.353356 | 4.943229 | 4.740657 | 4.974182 | 4.990262 | 5.250803 | 5.297722 | 5.101376 | 5.230028  | 5.842868 | 5.595713 | 5.497309 | 4.695844 | 5.110422 | 5.063088 | 5.387077 | 0.0332   | -0.116   | 0.0576   | 0.007365  | 1.395922 | 12 |
| 6780_at   | YCR086W      | CSM1  | 6.466359 | 6.8281   | 6.738216 | 6.909515 | 6.791074 | 7.260634 | 6.467965 | 6.787706 | 6.715263  | 6.857308 | 6.968747 | 7.243263 | 6.746227 | 7.36353  | 7.043966 | 6.924517 | 0.107    | -0.00767 | 0.114    | 0.013579  | 1.329596 | 13 |
| 6781_at   | YCR087W      |       | 4.876241 | 4.86699  | 4.476681 | 4.654938 | 4.679791 | 4.563187 | 4.49279  | 4.44344  | 4.4572019 | 4.495324 | 4.604227 | 4.059078 | 4.306774 | 4.45417  | 4.203469 | 4.476906 | -0.118   | 0.0157   | 0.0162   | 0.002375  | 1.366493 | 16 |
| 6782_at   | YCR087C-LUG1 |       | 7.705024 | 7.675103 | 7.895649 | 7.234138 | 7.215509 | 7.714531 | 6.985628 | 7.730894 | 6.665629  | 6.725764 | 7.15584  | 5.623483 | 5.563929 | 6.214062 | 6.590796 | 6.607342 | -0.574   | 0.0425   | 2.46E-05 | 9.71E-06  | 4.57397  | 18 |
| 6783_at   | YCR088W      | ABP1  | 6.715633 | 7.736083 | 7.265282 | 7.378017 | 7.302023 | 7.378094 | 7.393586 | 7.367674 | 7.200477  | 7.684159 | 7.162633 | 7.343194 | 6.352172 | 6.493294 | 6.62233  | 7.155667 | -0.261   | -0.0411  | 6.47E-05 | 2.13E-05  | 1.999071 | 16 |
| 6784_at   | YCR089W      | FIG2  | 4.6326   | 4.431801 | 3.973403 | 4.357955 | 4.15537  | 4.380592 | 4.469568 | 4.38179  | 4.513393  | 4.706235 | 4.857577 | 4.997934 | 5.702919 | 5.036391 | 5.066222 | 4.818228 | 0.265    | 0.0484   | 0.000338 | 8.42E-05  | 2.017121 | 8  |
| 6785_at   | YCR090C      |       | 7.179205 | 7.111207 | 6.973146 | 6.471793 | 6.632014 | 6.319457 | 6.3948   | 6.468994 | 6.115172  | 6.073557 | 5.911331 | 5.531046 | 6.091701 | 5.916768 | 5.179563 | 6.031051 | -0.365   | 0.104    | 3.52E-05 | 1.30E-05  | 2.631999 | 16 |
| 6786_at   | YCR091W      | KIN82 | 3.05541  | 3.286535 | 2.72584  | 3.855276 | 3.733933 | 3.652895 | 3.817486 | 3.658558 | 3.729906  | 3.571266 | 3.613661 | 4.081366 | 3.537427 | 3.569719 | 3.81939  | 3.848556 | 0.137    | -0.137   | 0.00122  | 0.000252  | 1.73701  | 9  |
| 6787_at   | YCR092C      | MSH3  | 3.343503 | 3.452444 | 3.043026 | 3.276385 | 3.270337 | 3.350267 | 3.298667 | 3.45447  | 2.909682  | 3.031256 | 3.123118 | 3.199304 | 3.529294 | 3.289383 | 3.141371 | 3.191516 | -0.00461 | 0.0317   | 0.57     | 0.057284  | 1.087813 | 13 |
| 6788_at   | YCR093W      | CDC39 | 5.067341 | 5.340041 | 4.589528 | 5.160937 | 4.938041 | 4.991555 | 4.856745 | 4.88441  | 4.975167  | 5.028814 | 5.158664 | 5.399583 | 7.062941 | 6.1955   | 6.150723 | 5.089287 | 0.367    | 0.179    | 2.09E-05 | 8.49E-06  | 2.915356 | 8  |
| 6789_at   | YCR094W      | CDC50 | 5.740518 | 5.77745  | 5.295014 | 5.642812 | 5.622248 | 5.442364 | 5.600603 | 5.543812 | 5.351771  | 5.265017 | 5.368832 | 5.734633 | 5.180238 | 5.430459 | 4.734971 | 5.478014 | -0.123   | -0.0325  | 0.0324   | 0.004403  | 1.386902 | 16 |
| 6790_at   | YCR095C      | OCA4  | 5.735968 | 5.822409 | 5.647221 | 5.867043 | 5.944815 | 5.589713 | 6.11375  | 5.987867 | 5.797922  | 6.236284 | 5.842298 | 6.229597 | 5.834318 | 6.169542 | 5.703189 | 6.010114 | 0.0606   | -0.0551  | 0.106    | 0.01269   | 1.259547 | 13 |
| 6791_s_at | YCR097W      | HMRA1 | 3.39043  | 3.692251 | 3.582655 | 3.946335 | 3.540474 | 3.479132 | 3.734169 | 3.758522 | 3.593383  | 3.568597 | 3.627852 | 3.938181 | 3.678664 | 3.469557 | 3.744038 | 3.709601 | 0.0202   | -0.0321  | 0.444    | 0.045788  | 1.116312 | 13 |
| 6792_s_at | YCR097W      | HMRA1 | 8.222359 | 8.327759 | 9.324681 | 9.027953 | 8.960584 | 8.67182  | 8.654158 | 8.657719 | 8.656306  | 8.438185 | 8.372676 | 8.886695 | 8.63378  | 8.531911 | 8.578016 | 8.687339 | -0.0362  | -0.0186  | 0.77     | 0.07513   | 1.113308 | 13 |
| 6793_at   | YCR098C      | GIT1  | 4.739136 | 4.292058 | 4.06995  | 4.752559 | 4.423286 | 4.592085 | 5.62957  | 5.679    | 5.448548  | 5.108095 | 5.572836 | 5.559928 | 6.015285 | 4.623364 | 5.774835 | 6.322586 | 0.494    | -0.0792  | 1.76E-05 | 7.38E-06  | 3.70134  | 7  |
| 6794_at   | YCR099C      |       | 4.221458 | 4.073474 | 3.865527 | 4.066088 | 4.082521 | 4.342937 | 4.310777 | 4.148444 | 4.00619   | 3.618142 | 3.403422 | 3.842722 | 4.069334 | 4.387662 | 4.242297 | 3.885439 | -0.0683  | 0.0319   | 0.288    | 0.0030972 | 1.205868 | 13 |
| 6795_at   | YCR100C      |       | 5.179012 | 5.299148 | 4.726388 | 5.160317 | 4.97524  | 4.849547 | 4.445509 | 5.302616 | 5.129378  | 4.942119 | 5.019206 | 4.578776 | 5.521734 | 5.041155 | 5.042148 | 5.061734 | -0.0155  | 0.0199   | 0.833    | 0.08064   | 1.075801 | 13 |
| 6796_at   | YCR101C      |       | 2.888984 | 2.640417 | 3.058691 | 2.911146 | 2.872234 | 2.790494 | 3.019091 | 2.813938 | 2.734574  | 2.673508 | 2.710796 | 2.698938 | 2.810933 | 2.668741 | 2.679866 | 2.768351 | -0.0473  | 0.00702  | 0.216    | 0.023892  | 1.33702  | 13 |
| 6797_at   | YCR102C      |       | 9.963186 | 9.869896 | 10.19447 | 9.187432 | 9.476792 | 9.647988 | 9.850771 | 9.376381 | 9.725641  | 10.2478  | 10.22492 | 10.45506 | 10.47108 | 10.70885 | 10.84732 | 9.850398 | 0.239    | 0.126    | 0.00149  | 0.0003    | 2.043444 | 8  |
| 6798_f_at | YCR104W      | PAU3  | 10.16635 | 10.29062 | 10.86477 | 10.30188 | 10.00777 | 10.19697 | 9.485799 | 9.808327 | 10.19169  | 9.4911   | 10.18763 | 10.42504 | 10.3965  | 10.41757 | 10.51533 | 10.03594 | 0.0216   | 0.111    | 0.274    | 0.029671  | 1.338653 | 13 |
| 6799_at   | YCR105W      | ADH7  | 7.038672 | 7.048521 | 7.504663 | 7.620232 | 7.61508  | 7.637931 | 7.700148 | 7.650403 | 7.325351  | 7.439738 | 7.404472 | 7.435642 | 7.805952 | 7.144236 | 7.148861 | 7.567337 | 0.0176   | -0.0744  | 0.186    | 0.020893  | 1.231345 | 13 |
| 6800_at   | YCR106W      | RDS1  | 5.24625  | 5.294252 | 5.504973 | 5.064774 | 4.700129 | 4.898044 | 5.580798 | 5.475377 | 5.192328  | 5.233515 | 5.93311  | 5.380359 | 4.836587 | 4.37783  | 4.937609 | 5.27981  | -0.0974  | -0.0793  | 0.208    | 0.023168  | 1.420114 | 12 |
| 6801_at   | YCL022C      |       | 4.277513 | 4.294062 | 5.542295 | 4.446405 | 4.443246 | 4.427745 | 4.486733 | 4.572674 | 4.417974  | 4.82332  | 4.600252 | 4.290577 | 4.429793 | 4.298106 | 4.278103 | 4.525172 | -0.077   | -0.00505 | 0.54     | 0.054433  | 1.263734 | 13 |
| 6802_at   | YCL022C      |       | 3.649042 | 3.645938 | 5.102629 | 3.279958 | 3.791433 | 3.641968 | 3.923112 | 3.599856 | 3.549935  | 3.76764  | 3.706752 | 3.578002 | 3.759073 | 3.742588 | 3.598894 | 3.633697 | -0.0984  | 0.0754   | 0.246    | 0.026911  | 1.405901 | 13 |
| 6804_at   | YCR064C      |       | 3.30262  | 3.366464 | 3.439131 | 3.369974 | 3.262566 | 3.314222 | 3.36522  | 3.24676  | 3.279438  | 3.512616 | 3.290499 | 3.600905 | 3.486016 | 3.51558  | 3.550442 | 3.328837 | 0.031    | 0.0315   | 0.236    | 0.025886  | 1.143432 | 13 |
| 6805_at   | YCR063W      | BUD31 | 6.14827  | 5.720152 | 5.622959 | 6.141049 | 6.021793 | 5.907386 | 6.171823 | 6.11629  | 5.974015  | 5.954934 | 5.935015 | 5.527015 | 4.842125 | 5.149389 | 4.93191  | 5.957648 | -0.228   | -0.152   | 6.92E-06 | 3.58E-06  | 2.102584 | 15 |
| 6806_at   | YCR065W      | HCM1  | 5.928107 | 5.621444 | 4.542548 | 5.931795 | 5.663467 | 5.332788 | 5.45685  | 5.398265 | 5.368189  | 4.472917 | 4.387662 | 4.242297 | 5.49887  | 4.224297 | 5.49887  | 4.224297 | -0.277   | -0.173   | 0.000793 | 0.000174  | 2.410564 | 15 |
| 6807_at   | YCR066W      | RAD18 | 4.931153 | 4.251067 | 3.786183 | 4.154031 | 4.267428 | 4.091379 | 4.438417 | 4.435269 | 3.649947  | 4.440896 | 3.687514 | 4.234223 | 3.354523 | 3.418625 | 3.320168 | 4.15079  | -0.17    | -0.122   | 0.00309  | 0.000559  | 1.767212 | 13 |
| 6808_at   | YCR067C      | SED4  | 6.172641 | 6.975506 | 7.219488 | 6.853595 | 6.823329 | 6.99134  | 7.112607 | 6.771069 | 6.622628  | 6.798581 | 6.726252 | 7.15139  | 7.564057 | 7.398637 | 7.217883 | 6.855913 | 0.0846   | 0.101    | 0.00217  | 0.000415  | 1.461527 | 15 |
| 6809_at   | YCR068W      | ATG15 | 6.671976 | 5.966837 | 6.06429  | 5.934669 | 5.733086 | 5.659296 | 7.188845 | 5.75083  | 5.754515  | 6.754659 | 6.797787 | 6.363409 | 7.789208 | 6.824401 | 7.469564 | 6.894169 | 0.327    | -0.0415  | 0.092    | 0.011169  | 2.378293 | 13 |
| 6810_g_at | YCR068W      | ATG15 | 5.88404  | 4.975    | 5.269413 | 4.855716 | 4.731583 | 4.885843 | 6.323131 | 6.761263 | 6.774274  | 5.977507 | 6.67798  | 5.922415 | 6.582411 | 6.637508 | 6.714993 | 6.607329 | 0.298    | -0.0793  | 0.135    | 0.015716  | 2.200506 | 9  |
| 6811_at   | YCR069W      | CPR4  | 9.046648 | 8.984534 | 8.967312 | 8.805738 | 8.811703 | 9.000934 | 9.272594 | 9.096083 | 9.212936  | 9.469171 | 9.498907 | 10.01285 | 9.841968 | 9.727788 | 10.2346  | 9.349649 | -0.285   | 0.026    | 0.000219 | 5.83E-05  | 2.126529 | 7  |
| 6812_at   | YCR071C      | IMG2  | 4.837876 | 5.005997 | 5.70265  | 5.934218 | 5.724023 | 5.7374   | 5.939088 | 5.726199 | 5.903773  | 5.401294 | 5.352353 | 5.661853 | 5.971689 | 5.805089 | 4.849264 | 5.651734 | -0.0902  | -0.156   | 0.0125   | 0.001888  | 1.674039 | 12 |
| 6813_at   | YCR072C      | RSA4  | 7.2802   | 7.310939 | 7.302787 | 6.869367 | 6.840874 | 6.616238 | 6.732893 | 6.77791  | 6.336515  | 6.475484 | 6.112599 | 5.669065 | 5.791216 | 5.804926 | 5.792434 | 6.312009 | -0.405   | 0.0656   | 1.77E-06 | 1.29E-06  | 2.925641 | 16 |
| 6814_at   | YCR073C      | SSK22 | 6.610057 | 6.028916 | 6.870704 | 5.59916  | 5.528429 | 5.71746  | 5.534091 | 5.521501 | 5.32332   | 5.370774 | 5.251197 | 5.312408 | 5.588427 | 5.575271 | 5.486301 | 5.315226 | -0.198   | 0.171    | 8.77E-05 | 2.74E-05  | 2.027853 | 14 |
| 6815_at   | YCR073W      | SOL2  | 9.354679 | 9.146975 | 9.086422 | 9.548565 | 9.442161 | 9.682073 | 9.998385 | 9.808557 | 9.637553  | 10.16318 | 10.55828 | 10.1812  | 10.29455 | 10.06934 | 10.46093 | 10.05372 | 0.309    | -0.0908  | 1.03E-05 | 4.85E-06  | 2.268631 | 9  |
| 6816_at   | YCR075C      | ERS1  | 7.466663 | 7.412351 | 8.067771 | 7.473904 | 7.418266 | 7.513923 | 7.052752 | 7.025805 | 7.100474  | 6.409227 | 6.84454  | 6.778992 | 6.143687 | 5.946528 | 6.150504 | 6.87681  | -0.434   | 0.00122  | 1.1E-06  | 9.07E-07  | 3.156094 | 16 |
| 6817_at   | YCR076C      |       | 7.666273 | 7.658788 | 8.240845 | 7.967158 | 7.899337 | 8.067595 | 8.122351 | 8.0664   | 8.066559  | 8.066535 | 7.923239 | 7.70612  | 7.138665 | 6.84685  | 7.051957 | 7.976965 | -0.213   | -0.15    | 1.16E-05 | 3.56E-06  | 2.04261  | 15 |
| 6818_at   | YCR077C      | PAT1  | 7.405187 | 7.421985 | 7.263242 | 7.417588 | 7.179956 | 7.395726 | 6.973128 | 6.810719 | 7.13133   | 6.824415 | 7.148531 | 7.274286 | 7.531066 | 6.470482 | 7.301105 | 7.074335 | -0.0729  | 0.046    | 0.339    | 0.035895  | 1.256697 | 13 |
| 6819_at   | YCR079W      | PTC6  | 6.669671 | 6.162751 | 6.124961 | 6.914049 | 6.913368 | 7.116777 | 6.887262 | 7.385991 | 7.08888   | 6.890975 | 6.796456 | 7.131462 | 6.80288  |          |          |          |          |          |          |           |          |    |

|           |                |          |          |          |          |          |          |          |          |          |          |          |          |          |          |          |          |         |         |          |          |          |    |
|-----------|----------------|----------|----------|----------|----------|----------|----------|----------|----------|----------|----------|----------|----------|----------|----------|----------|----------|---------|---------|----------|----------|----------|----|
| 6851_at   | YCR019W MAK32  | 5.312813 | 5.425599 | 5.075431 | 5.613984 | 5.585782 | 5.24567  | 5.389406 | 5.409928 | 5.385382 | 5.627375 | 5.475141 | 5.459653 | 5.165677 | 5.197842 | 5.015886 | 5.489636 | -0.0314 | -0.0794 | 0.00744  | 0.001204 | 1.266779 | 13 |
| 6852_at   | YCR020C PET18  | 5.688109 | 7.696056 | 7.434688 | 8.383559 | 8.351031 | 8.682056 | 7.944573 | 8.071532 | 8.095755 | 7.267768 | 7.492397 | 7.605579 | 7.655756 | 7.502807 | 7.498341 | 7.923272 | -0.168  | -0.0425 | 0.126    | 0.014831 | 1.561405 | 16 |
| 6853_at   | YCR020C-MAK31  | 9.430208 | 9.240642 | 9.646543 | 9.151692 | 9.123108 | 9.444025 | 9.007696 | 9.154802 | 8.820584 | 8.182534 | 8.360968 | 8.242067 | 7.736328 | 7.758244 | 7.470987 | 8.649606 | -0.5    | -0.0236 | 1.04E-07 | 1.75E-07 | 3.766447 | 18 |
| 6854_at   | YCR021C HSP30  | 5.290956 | 4.686065 | 4.844127 | 6.614701 | 6.05428  | 6.235241 | 6.703333 | 6.639065 | 8.054086 | 9.732546 | 8.868005 | 9.788287 | 10.95894 | 10.90357 | 11.12881 | 8.558414 | 1.65    | -0.175  | 2.58E-09 | 1.74E-08 | 8.010708 | 1  |
| 6855_at   | YCR022C        | 3.970198 | 3.897708 | 3.512123 | 3.785119 | 3.689453 | 3.574443 | 3.582055 | 3.751076 | 3.689533 | 3.803308 | 3.918405 | 3.553595 | 5.603536 | 4.844663 | 5.106623 | 3.733626 | 0.41    | 0.251   | 0.000106 | 3.20E-05 | 3.648347 | 8  |
| 6856_at   | YCR023C        | 6.776313 | 6.556671 | 6.100298 | 6.626029 | 6.644941 | 6.455384 | 6.807793 | 6.803326 | 6.570837 | 6.477159 | 6.607134 | 6.716079 | 6.93157  | 6.804683 | 6.650188 | 6.679154 | 0.162   | 0.0411  | 0.073    | 0.009104 | 1.538345 | 13 |
| 6857_at   | YCR024C SLM5   | 5.162513 | 5.378654 | 4.851218 | 5.695094 | 5.49558  | 5.399083 | 5.2589   | 5.344674 | 5.212717 | 4.755792 | 5.105932 | 5.132648 | 5.548014 | 5.427579 | 5.092772 | 5.248106 | 0.00726 | 0.00629 | 0.979    | 0.093317 | 1.027371 | 13 |
| 6858_f_at | YCR024C-PMP1   | 10.3786  | 10.63249 | 10.44981 | 10.46059 | 10.45659 | 10.9053  | 10.61094 | 10.43248 | 10.64171 | 9.867156 | 9.966251 | 10.64688 | 9.868034 | 9.025489 | 9.579521 | 10.38426 | -0.293  | -0.116  | 0.000127 | 3.69E-05 | 2.227958 | 15 |
| 6859_at   | YCR025C        | 4.642897 | 4.674079 | 4.261403 | 4.484666 | 4.392192 | 4.435049 | 4.516355 | 4.617883 | 4.404962 | 4.751361 | 5.082796 | 4.670996 | 5.493199 | 5.294803 | 4.994433 | 4.647192 | 0.209   | 0.0652  | 0.000153 | 4.35E-05 | 1.74058  | 8  |
| 6860_at   | YCR026C NPP1   | 5.498069 | 5.773646 | 5.641857 | 5.820329 | 5.931529 | 5.776439 | 4.656861 | 6.02542  | 6.180075 | 6.090086 | 5.961435 | 5.769798 | 5.293678 | 5.328787 | 5.57517  | 6.051039 | -0.063  | -0.148  | 0.000709 | 0.000158 | 1.566124 | 12 |
| 6861_at   | YCR027C RHB1   | 4.457512 | 4.488375 | 3.835183 | 4.486669 | 4.605503 | 4.544705 | 4.823707 | 4.674537 | 4.656382 | 4.875552 | 4.478978 | 4.694915 | 4.356602 | 4.159735 | 4.497244 | 4.709634 | 0.0208  | -0.113  | 0.0129   | 0.001944 | 1.359602 | 12 |
| 6862_at   | YCR028C FEN2   | 5.271311 | 4.807311 | 4.123373 | 4.567802 | 4.416569 | 4.326959 | 4.650545 | 4.33553  | 5.167644 | 5.286687 | 5.227522 | 4.728496 | 4.530702 | 4.09547  | 4.338341 | 5.078217 | -0.0746 | -0.16   | 0.0709   | 0.008873 | 3.642511 | 12 |
| 6863_at   | YCR028C-RIM1   | 8.714906 | 8.799693 | 8.79909  | 8.706279 | 8.549317 | 8.888945 | 8.444886 | 8.151117 | 7.845391 | 7.452417 | 7.412056 | 6.672364 | 6.721103 | 6.815403 | 6.923124 | 8.065626 | -0.522  | -0.0693 | 3.16E-05 | 1.19E-05 | 1.393119 | 18 |
| 6864_at   | YCR028C-RIM1   | 8.742735 | 8.659067 | 8.589379 | 8.47724  | 8.486815 | 8.844028 | 8.308725 | 8.200893 | 8.108035 | 7.81013  | 7.772109 | 8.391883 | 6.634477 | 6.605466 | 6.748156 | 8.132204 | -0.516  | -0.127  | 7.48E-08 | 1.40E-07 | 3.928207 | 17 |
| 6865_at   | YCR030C SYP1   | 6.412865 | 6.367909 | 6.382335 | 6.882834 | 6.668927 | 6.956016 | 6.901665 | 6.67115  | 6.637536 | 6.196344 | 5.93154  | 6.599581 | 7.49227  | 6.874108 | 6.939192 | 6.611496 | 0.114   | 0.0453  | 0.21     | 0.023359 | 1.305403 | 13 |
| 6866_at   | YCR031C RPS14A | 10.73456 | 10.9736  | 11.06522 | 10.32942 | 10.33173 | 10.73663 | 10.40936 | 10.31939 | 9.858728 | 9.501633 | 9.743331 | 10.29665 | 9.217052 | 8.728166 | 9.083811 | 9.992425 | -0.494  | -0.0068 | 2.88E-06 | 1.85E-06 | 3.707648 | 16 |
| 6867_at   | YCR032W BPH1   | 5.734299 | 5.751138 | 6.402769 | 5.745855 | 6.010521 | 5.414197 | 6.066719 | 5.666882 | 5.420271 | 5.410257 | 5.24649  | 5.344984 | 4.901373 | 4.831022 | 5.206943 | 5.502125 | -0.217  | 0.0197  | 0.00615  | 0.001021 | 1.776648 | 18 |
| 6868_at   | YCR033W SNT1   | 7.227205 | 7.042862 | 7.422003 | 7.087027 | 6.976521 | 6.843777 | 7.214692 | 7.078138 | 6.927298 | 7.118435 | 7.532432 | 7.420629 | 8.302164 | 8.086272 | 8.190979 | 7.171857 | 0.264   | 0.146   | 8.33E-07 | 7.36E-07 | 2.228869 | 8  |
| 6869_at   | YCR034W FEN1   | 9.33069  | 9.287472 | 8.721769 | 8.427711 | 8.573809 | 7.975357 | 7.669021 | 7.368676 | 7.060518 | 6.640623 | 6.360942 | 6.255578 | 5.841795 | 5.793928 | 5.455274 | 6.940575 | -0.938  | 0.136   | 5.79E-08 | 1.18E-07 | 12.03026 | 20 |
| 6870_at   | YCL010C SGF29  | 6.590343 | 6.467887 | 5.002386 | 5.477878 | 5.746591 | 5.020111 | 6.149865 | 6.171554 | 5.742585 | 5.370205 | 5.652241 | 4.46351  | 6.423121 | 5.364528 | 4.809092 | 5.447045 | -0.148  | 0.087   | 0.43     | 0.044465 | 1.56605  | 16 |
| 6871_at   | YCL009C ILV6   | 9.997469 | 10.0464  | 10.25967 | 9.49847  | 9.923339 | 9.938648 | 10.15883 | 9.852853 | 9.950008 | 10.25139 | 10.24647 | 10.38353 | 9.190084 | 9.781091 | 9.874076 | 9.988959 | -0.0576 | -0.046  | 0.499    | 0.050723 | 1.228054 | 13 |
| 6872_at   | YCL007C        | 4.334436 | 4.819997 | 4.357194 | 3.797338 | 4.412336 | 4.55483  | 4.585058 | 4.188322 | 4.518102 | 4.005371 | 4.272612 | 4.479608 | 4.087944 | 4.173898 | 4.556753 | 4.285    | -0.0566 | 0.0263  | 0.526    | 0.053195 | 1.167213 | 13 |
| 6874_at   | YCL005W LDB16  | 7.162109 | 7.217351 | 7.075954 | 6.96344  | 7.056558 | 6.780326 | 6.988318 | 6.728364 | 6.653025 | 6.917015 | 6.581749 | 6.862647 | 6.621114 | 6.252482 | 6.498521 | 6.772893 | -0.17   | 0.00803 | 0.000569 | 0.000131 | 1.568807 | 16 |
| 6875_at   | YCL004W PGS1   | 4.13383  | 4.185551 | 3.660347 | 4.171554 | 4.288945 | 4.021848 | 4.618911 | 4.584102 | 4.47002  | 4.269929 | 4.184041 | 4.164255 | 3.868922 | 3.798295 | 3.771148 | 4.348985 | -0.0538 | -0.124  | 0.00397  | 0.000698 | 1.458606 | 12 |
| 6876_at   | YCL002C        | 7.081537 | 6.931276 | 6.348359 | 6.7701   | 6.794435 | 6.579344 | 7.020269 | 6.778052 | 6.760242 | 6.803477 | 6.820381 | 7.110924 | 6.103514 | 5.97333  | 6.226038 | 6.832927 | -0.148  | -0.111  | 0.00235  | 0.000443 | 1.66677  | 16 |
| 6877_at   | YCL001W RER1   | 8.008905 | 8.074475 | 8.382886 | 8.093699 | 8.148227 | 8.208728 | 8.141348 | 7.961088 | 7.957382 | 7.691494 | 8.113084 | 7.062665 | 5.206607 | 7.231234 | 7.933852 | 7.933852 | -0.26   | -0.0737 | 0.00306  | 1.60E-06 | 1.990648 | 16 |
| 6878_at   | YCL001W-A      | 3.012337 | 2.925615 | 3.654869 | 2.806604 | 2.853071 | 3.125577 | 3.085361 | 2.992535 | 2.930854 | 2.731718 | 2.799948 | 3.017827 | 2.819416 | 2.972787 | 3.024838 | 2.883328 | -0.0662 | 0.0498  | 0.141    | 0.016362 | 1.254738 | 13 |
| 6879_at   | YCR001W        | 7.394789 | 3.762179 | 4.655547 | 3.698462 | 3.890005 | 3.865148 | 3.790521 | 3.611028 | 3.456159 | 3.51913  | 3.579534 | 3.337479 | 3.649783 | 3.485814 | 3.344531 | 3.550721 | -0.153  | 0.0624  | 0.0188   | 0.00272  | 1.50086  | 16 |
| 6880_at   | YCR002C CDC10  | 8.269368 | 8.46684  | 8.861946 | 8.335079 | 8.360918 | 8.176538 | 8.242351 | 8.191268 | 7.796355 | 8.227947 | 8.100404 | 8.747487 | 7.477897 | 7.974552 | 7.883248 | 8.195218 | -0.162  | -0.0134 | 0.0462   | 0.000646 | 1.536973 | 16 |
| 6881_at   | YCR003W MRP132 | 8.049726 | 7.975762 | 8.071341 | 8.188569 | 8.298596 | 7.818679 | 7.954058 | 7.942077 | 7.552995 | 7.240257 | 7.920245 | 7.183575 | 6.492287 | 5.93989  | 5.560016 | 7.591402 | -0.549  | -0.154  | 2.39E-07 | 3.01E-07 | 4.290773 | 17 |
| 6882_at   | YCR004C YCP4   | 8.737183 | 8.45996  | 7.993684 | 8.705544 | 8.677638 | 8.192894 | 8.737256 | 8.990382 | 8.34933  | 8.599505 | 8.342171 | 8.555263 | 7.541221 | 7.183374 | 7.486683 | 8.573641 | -0.245  | -0.187  | 8.71E-05 | 2.72E-05 | 2.348409 | 15 |
| 6883_at   | YCR005C CIT2   | 9.782242 | 9.143588 | 8.87807  | 8.183092 | 9.227908 | 7.735645 | 9.344928 | 9.467507 | 8.975025 | 8.286626 | 8.496352 | 8.252918 | 8.446945 | 8.307064 | 8.32744  | 8.716933 | -0.203  | 0.0157  | 0.235    | 0.025783 | 1.712355 | 16 |
| 6884_at   | YCR006C        | 4.50312  | 4.069576 | 5.444626 | 4.124058 | 4.199636 | 4.105308 | 4.578541 | 4.695158 | 4.677268 | 4.608072 | 4.526446 | 4.079751 | 4.482358 | 3.889889 | 4.255268 | 4.377805 | -0.0938 | 0.0102  | 0.506    | 0.051421 | 1.822688 | 13 |
| 6885_at   | YCR006W SAT4   | 7.48805  | 7.370443 | 7.117663 | 7.46112  | 7.610806 | 7.950066 | 7.98996  | 7.979148 | 7.952707 | 8.18255  | 8.004128 | 8.019241 | 8.31068  | 7.878413 | 8.110772 | 7.987444 | 0.254   | -0.0556 | 0.000206 | 5.55E-05 | 1.958157 | 9  |
| 6886_at   | YCR009C RVS161 | 9.418863 | 9.018699 | 9.125495 | 9.612817 | 9.570999 | 9.339392 | 9.507337 | 9.487945 | 9.616604 | 9.058539 | 9.394787 | 9.30231  | 8.228723 | 7.65897  | 8.846905 | 9.407627 | -0.281  | -0.172  | 7.45E-05 | 2.40E-05 | 2.425777 | 15 |
| 6887_at   | YCR010C ADY2   | 5.430937 | 5.004475 | 5.992468 | 5.030547 | 4.917578 | 5.107261 | 4.952206 | 4.577954 | 4.768349 | 5.261441 | 4.865376 | 4.490927 | 7.240281 | 5.864646 | 5.951323 | 4.81751  | 0.21    | 0.303   | 0.00077  | 0.00017  | 2.887153 | 8  |
| 6888_at   | YCR011C ADP1   | 6.969857 | 7.04263  | 7.14793  | 7.299865 | 6.975018 | 6.887724 | 5.949602 | 7.204281 | 7.337107 | 7.274465 | 7.344769 | 7.162107 | 7.040027 | 7.091646 | 7.073008 | 7.264339 | 0.0124  | -0.0587 | 0.122    | 0.014346 | 1.175793 | 13 |
| 6889_at   | YCR013C        | 5.844979 | 6.442211 | 6.451392 | 5.223051 | 5.096967 | 5.859561 | 5.654935 | 5.510318 | 6.017569 | 5.764479 | 6.009243 | 5.058864 | 4.841301 | 6.664318 | 5.37726  | 5.499382 | -0.124  | 0.112   | 0.288    | 0.030972 | 1.601994 | 14 |
| 6890_at   | YCR012W PGK1   | 12.58659 | 12.66307 | 12.48402 | 12.41836 | 12.41914 | 12.83283 | 12.63045 | 12.46391 | 12.91568 | 12.70042 | 12.82934 | 12.96619 | 12.62525 | 12.81244 | 12.95491 | 12.72454 | 0.0737  | -0.0125 | 0.153    | 0.017614 | 1.215657 | 13 |
| 6891_at   | YCR014C POL4   | 5.518106 | 5.432612 | 4.702784 | 5.207145 | 5.391737 | 5.411577 | 5.379476 | 5.108356 | 5.131987 | 5.471727 | 4.959747 | 5.011661 | 4.918097 | 5.060409 | 5.03829  | 5.213428 | -0.0649 | -0.0257 | 0.32     | 0.034011 | 1.914001 | 13 |
| 6892_at   | YCR015C        | 6.29426  | 5.908051 | 5.178366 | 5.591929 | 5.5651   | 5.34996  | 5.155444 | 5.237909 | 4.611364 | 4.604141 | 4.020076 | 4.234106 | 4.353958 | 4.121181 | 4.028888 | 4.611496 | -0.45   | 0.0639  | 6.44E-05 | 2.13E-05 | 3.293083 | 16 |
| 6893_at   | YCL039W GID7   | 5.521841 | 5.       |          |          |          |          |          |          |          |          |          |          |          |          |          |          |         |         |          |          |          |    |

|           |           |         |          |          |          |          |          |          |          |          |          |           |           |           |          |          |          |          |         |          |          |          |          |    |
|-----------|-----------|---------|----------|----------|----------|----------|----------|----------|----------|----------|----------|-----------|-----------|-----------|----------|----------|----------|----------|---------|----------|----------|----------|----------|----|
| 6925_at   | YCL0510W  | LRL1    | 5.36545  | 5.255751 | 5.192862 | 5.132285 | 5.223412 | 5.227133 | 5.290413 | 5.434371 | 5.20044  | 5.521036  | 5.49975   | 5.818207  | 5.914747 | 6.172356 | 5.991712 | 5.430007 | 0.214   | 0.0574   | 4.44E-06 | 2.56E-06 | 1.765236 | 8  |
| 6926_at   | YCL0500C  | APA1    | 7.524871 | 7.515947 | 7.582584 | 6.923294 | 6.961243 | 6.659849 | 6.310204 | 6.327735 | 6.130887 | 6.665904  | 6.024786  | 6.096786  | 6.500511 | 6.435613 | 6.058558 | 6.100684 | -0.34   | 0.234    | 1.73E-06 | 1.27E-06 | 3.040172 | 14 |
| 6928_at   | YCL049C   |         | 9.310508 | 9.204666 | 8.879236 | 9.285399 | 9.180444 | 8.987589 | 9.1723   | 8.644071 | 8.927169 | 8.714478  | 8.51434   | 8.633904  | 8.537017 | 8.558935 | 8.49733  | 8.814893 | -0.183  | 0.00862  | 0.00177  | 0.000346 | 1.624486 | 16 |
| 6928_at   | YCL048W   | SPS22   | 3.032399 | 3.297535 | 2.935479 | 3.251253 | 3.250863 | 3.230437 | 3.418549 | 3.243665 | 3.082752 | 3.215612  | 3.271311  | 3.371007  | 3.929323 | 3.104909 | 3.041682 | 3.253633 | 0.00598 | -0.0641  | 0.00544  | 0.000916 | 1.170903 | 13 |
| 6929_at   | YCL047C   |         | 4.04102  | 4.174    | 3.985387 | 4.862148 | 5.150186 | 4.816924 | 4.847108 | 4.224793 | 4.381144 | 4.006187  | 3.821846  | 4.108357  | 3.11887  | 3.346902 | 3.082647 | 4.429353 | -0.296  | -0.209   | 0.000149 | 4.25E-05 | 2.071381 | 15 |
| 6930_at   | YCL045C   |         | 4.946843 | 5.313134 | 5.234995 | 5.077842 | 4.899284 | 4.937416 | 4.831245 | 4.67244  | 4.694881 | 4.502951  | 4.363677  | 4.553329  | 4.405313 | 4.606247 | 4.503704 | 4.781162 | -0.178  | 0.0153   | 0.0157   | 0.002304 | 1.604484 | 16 |
| 6931_at   | YCL046W   |         | 3.353122 | 3.215298 | 3.313879 | 3.231224 | 3.438156 | 3.369094 | 3.876756 | 3.421208 | 3.364282 | 3.395886  | 3.231687  | 3.266499  | 3.104538 | 2.984521 | 3.062078 | 3.405261 | -0.0695 | -0.0646  | 0.0135   | 0.002027 | 1.308174 | 13 |
| 6932_at   | YCL044C   | MGR1    | 5.257883 | 5.354449 | 4.448061 | 5.216486 | 5.211268 | 4.906719 | 5.711463 | 5.338664 | 5.131147 | 6.389215  | 5.702198  | 5.758804  | 7.961271 | 7.059363 | 6.893841 | 5.649485 | 0.607   | 0.138    | 7.79E-06 | 3.93E-06 | 4.998029 | 6  |
| 6933_at   | YCL043C   | PD11    | 10.94312 | 11.01112 | 10.99801 | 11.01608 | 11.02613 | 11.36608 | 11.27323 | 11.05993 | 11.1609  | 11.48845  | 11.27572  | 11.63947  | 11.10562 | 11.55279 | 11.49297 | 11.32402 | -0.026  | 0.000698 | 0.000156 | 1.469045 | 13       |    |
| 6934_at   | YCL041C   |         | 3.995713 | 3.790857 | 4.046155 | 3.826824 | 3.994028 | 4.061489 | 4.376565 | 4.366837 | 3.970073 | 4.032665  | 4.065691  | 3.872879  | 4.103788 | 4.354337 | 3.941852 | 4.084875 | 0.0385  | -0.0134  | 0.581    | 0.058179 | 1.107567 | 13 |
| 6935_at   | YCL042W   |         | 6.189446 | 6.017599 | 6.212062 | 6.041797 | 5.895985 | 6.203867 | 6.371714 | 6.401288 | 6.338079 | 5.999455  | 6.390919  | 5.715677  | 6.20375  | 6.093038 | 5.925456 | 6.151736 | -0.0253 | -0.0138  | 0.761    | 0.074368 | 1.079605 | 13 |
| 6936_g_at | YCL042W   |         | 7.790967 | 7.202921 | 5.948779 | 7.290104 | 6.069378 | 7.778836 | 8.582404 | 9.408456 | 6.689431 | 7.613201  | 8.0050871 | 8.346354  | 9.679993 | 9.721722 | 9.596994 | 8.417568 | 0.525   | -0.12    | 0.0724   | 0.009037 | 4.019095 | 7  |
| 6937_at   | YCL040W   | GLK1    | 10.34563 | 10.31288 | 9.765923 | 11.26926 | 11.05403 | 11.05637 | 11.46863 | 11.49055 | 11.33484 | 11.11855  | 11.27355  | 11.45539  | 12.90599 | 11.52392 | 11.91644 | 11.46693 | 0.386   | -0.129   | 0.000065 | 2.14E-05 | 2.780228 | 7  |
| 6955_s_at | YCL076W   |         | 2.96077  | 3.233755 | 5.054912 | 3.173171 | 3.050228 | 3.238135 | 3.135894 | 3.151176 | 2.946451 | 3.190561  | 3.067295  | 2.965258  | 3.088125 | 3.055345 | 3.085905 | 3.000926 | -0.155  | 0.11     | 0.164    | 0.018671 | 1.676182 | 14 |
| 6957_s_at | YCL068C   |         | 4.080179 | 3.955609 | 5.395552 | 3.9705   | 4.035695 | 4.132905 | 3.971636 | 4.006311 | 3.971709 | 3.992303  | 4.060382  | 3.669232  | 3.816076 | 3.964546 | 3.755431 | 3.892298 | -0.179  | 0.0573   | 0.0574   | 0.007346 | 1.606128 | 16 |
| 6958_s_at | YCL067C   | HMLALPH | 6.839715 | 6.889057 | 7.520417 | 7.504041 | 7.268911 | 7.008824 | 7.483429 | 6.953881 | 7.376243 | 8.421169  | 7.733472  | 7.94717   | 8.860193 | 7.689409 | 8.845454 | 7.659561 | 0.394   | 0.0285   | 0.00125  | 0.000257 | 2.843627 | 7  |
| 6959_s_at | YCL066W   | HMLALPH | 3.379361 | 3.052101 | 3.219805 | 3.485576 | 3.300587 | 3.586297 | 3.191775 | 3.278706 | 3.313922 | 3.319725  | 3.625445  | 3.102135  | 3.370796 | 3.251834 | 3.508208 | 3.370911 | 0.05    | -0.0162  | 0.459    | 0.047153 | 1.141641 | 13 |
| 6960_at   | YCL065W   |         | 3.034819 | 2.845119 | 2.514563 | 2.666068 | 2.719796 | 3.002624 | 2.526394 | 2.882129 | 3.048984 | 2.888138  | 2.912702  | 2.660477  | 2.808532 | 3.0335   | 3.019587 | 2.826999 | 0.0364  | 0.0139   | 0.577    | 0.057885 | 1.103575 | 13 |
| 6961_g_at | YCL065W   |         | 5.795953 | 5.890003 | 5.669764 | 5.677067 | 5.480963 | 5.912437 | 4.806356 | 5.492066 | 5.758896 | 5.3742    | 6.195754  | 6.289098  | 6.218782 | 6.801911 | 7.05162  | 5.793069 | 0.261   | 0.136    | 0.00245  | 0.000459 | 2.178847 | 8  |
| 7033_at   | YBR109w-a |         | 3.26919  | 3.293575 | 4.212969 | 3.145173 | 3.189688 | 3.16164  | 3.386045 | 3.280761 | 2.954713 | 3.074209  | 3.129567  | 3.062649  | 3.388334 | 3.262064 | 3.481766 | 3.087282 | -0.0521 | 0.107    | 0.0492   | 0.006391 | 1.410251 | 13 |
| 7034_i_at | YBR126w-a |         | 12.10543 | 12.06974 | 12.07189 | 12.80476 | 12.66908 | 12.58743 | 12.66539 | 12.78187 | 12.81569 | 12.49908  | 12.85607  | 12.68498  | 12.53114 | 12.68099 | 12.58428 | 12.79603 | 0.109   | -0.123   | 0.000104 | 3.16E-05 | 1.602853 | 13 |
| 7035_s_at | YBR126w-a |         | 11.54214 | 11.42899 | 11.61713 | 12.28936 | 12.16199 | 12.1903  | 11.9351  | 12.1869  | 12.18515 | 11.93155  | 12.29129  | 12.27211  | 12.1914  | 12.29122 | 12.24357 | 12.24863 | 0.157   | -0.0945  | 0.000456 | 0.000109 | 1.618647 | 9  |
| 7036_s_at | YBL069W   | AST1    | 5.644714 | 5.339071 | 5.856106 | 4.922409 | 4.974933 | 4.805365 | 5.395811 | 5.504576 | 5.266145 | 5.276868  | 5.41936   | 5.220572  | 5.912703 | 5.518244 | 5.73329  | 5.247766 | 0.0716  | 0.106    | 0.0577   | 0.007372 | 1.444275 | 13 |
| 7037_s_at | YBR006W   | UGA2    | 6.014761 | 6.147952 | 5.841715 | 7.083465 | 7.307467 | 6.659445 | 8.572792 | 7.75393  | 6.584431 | 7.370384  | 7.170284  | 6.8621793 | 7.636545 | 6.132427 | 6.56898  | 7.711121 | 0.136   | -0.362   | 0.021    | 0.002995 | 2.987663 | 10 |
| 7038_s_at | YBR201W   | DER1    | 7.091744 | 6.966336 | 7.721324 | 7.194658 | 7.267519 | 7.043039 | 7.180788 | 7.0611   | 6.885455 | 6.886614  | 6.726191  | 6.865641  | 6.423886 | 6.049227 | 6.420061 | 6.937441 | -0.254  | -0.0427  | 0.000132 | 3.83E-05 | 1.958459 | 16 |
| 7039_at   | YBR266C   | SLM6    | 4.356425 | 4.472643 | 4.210753 | 4.27854  | 4.203172 | 4.517918 | 4.266709 | 4.318166 | 4.151175 | 4.131013  | 4.171973  | 4.402483  | 3.855275 | 3.964548 | 3.814132 | 4.090631 | -0.297  | 0.106    | 0.00922  | 0.001446 | 2.198499 | 16 |
| 7040_g_at | YBR266C   | SLM6    | 4.565844 | 4.39708  | 5.7074   | 4.404481 | 4.338331 | 4.382934 | 4.413824 | 4.415681 | 4.422931 | 4.451612  | 4.587384  | 3.964233  | 4.175877 | 3.777168 | 4.208436 | 4.292757 | -0.195  | 0.0455   | 0.00447  | 0.005869 | 1.677422 | 16 |
| 7041_s_at | YBR267W   | RE11    | 6.864835 | 6.802767 | 7.344112 | 6.481595 | 6.591297 | 6.893918 | 6.154295 | 6.723362 | 6.242076 | 6.022026  | 6.444392  | 5.686021  | 5.405269 | 6.324151 | -0.341   | -0.0138  | 0.00263 | 6.82E-05 | 0.275    | 0.472524 | 1.606128 | 16 |
| 7057_at   | YBR284W   |         | 4.082717 | 4.355982 | 3.983295 | 5.248522 | 5.20441  | 4.54562  | 5.949721 | 5.05699  | 5.928344 | 7.241593  | 6.902153  | 7.387335  | 8.056988 | 8.011537 | 7.775226 | 6.538482 | 1.04    | -0.139   | 5.87E-10 | 8.64E-09 | 15.70411 | 4  |
| 7058_at   | YBR285W   |         | 5.411168 | 5.926225 | 5.395318 | 5.841656 | 5.976967 | 6.444266 | 5.171925 | 6.261339 | 6.233492 | 5.29272   | 5.592328  | 5.962157  | 5.219168 | 6.315456 | 5.929864 | 5.870242 | 0.0137  | -0.0396  | 0.864    | 0.083218 | 1.128485 | 13 |
| 7059_at   | YBR286W   | APE3    | 10.73272 | 10.92894 | 10.80833 | 10.77833 | 10.71064 | 11.19408 | 10.77017 | 10.58395 | 11.25284 | 8.995938  | 10.06076  | 10.90435  | 8.603391 | 10.02741 | 9.944056 | 10.59661 | -0.363  | -0.113   | 0.00251  | 0.000469 | 2.617111 | 15 |
| 7060_at   | YBR287W   | ZSP1    | 7.90454  | 7.361585 | 6.168827 | 8.179504 | 7.99992  | 8.065055 | 8.325814 | 8.317472 | 8.456597 | 8.416377  | 8.323558  | 8.747623  | 8.210544 | 8.838644 | 8.621156 | 8.521314 | 0.316   | -0.2     | 0.00155  | 0.00031  | 2.70087  | 9  |
| 7061_at   | YBR288C   | APM3    | 7.320432 | 7.638713 | 7.626513 | 6.984122 | 7.139587 | 7.165202 | 6.82799  | 6.808433 | 6.752569 | 6.777337  | 6.705223  | 7.215551  | 6.36774  | 6.734276 | 6.988512 | 6.824481 | -0.199  | 0.0783   | 0.00166  | 0.000327 | 1.693335 | 16 |
| 7062_at   | YBR289W   | SNF5    | 7.47648  | 7.501148 | 7.694359 | 7.435748 | 7.459689 | 7.57147  | 7.395373 | 7.46329  | 6.989699 | 7.528374  | 7.405208  | 6.987346  | 8.587455 | 8.245853 | 7.797441 | 7.379441 | 0.158   | 0.00193  | 0.000374 | 1.833168 | 8        |    |
| 7063_at   | YBR290W   | BSD2    | 7.111086 | 6.9928   | 6.640333 | 7.081968 | 7.150643 | 6.345962 | 7.170099 | 7.203119 | 7.210035 | 8.079439  | 7.478789  | 7.622949  | 8.298549 | 8.206168 | 8.265773 | 7.393699 | 0.387   | 0.0468   | 6.03E-05 | 2.01E-05 | 2.879341 | 7  |
| 7064_at   | YBR291C   | CTP1    | 8.78435  | 9.017532 | 9.219503 | 8.077836 | 8.320464 | 8.069977 | 7.237639 | 7.330427 | 7.383535 | 7.10953   | 6.935823  | 7.202271  | 6.511881 | 7.022263 | 6.758803 | 7.210732 | -0.589  | 0.189    | 2.5E-07  | 3.07E-07 | 4.770532 | 18 |
| 7065_at   | YBR292C   |         | 5.207448 | 5.262491 | 4.999948 | 5.204509 | 5.344689 | 5.449376 | 5.078979 | 5.171314 | 5.200123 | 5.106986  | 5.504411  | 5.278581  | 5.24908  | 5.673053 | 5.505955 | 5.236988 | 0.0679  | 0.0248   | 0.067    | 0.008434 | 1.199107 | 13 |
| 7066_at   | YBR293W   | VBA2    | 4.519921 | 5.183421 | 4.877201 | 5.000336 | 5.754479 | 5.772599 | 6.349901 | 6.408665 | 6.349172 | 4.7714708 | 7.141442  | 7.265046  | 7.34994  | 7.092023 | 7.182539 | 6.796108 | 0.594   | -0.176   | 4.14E-07 | 4.49E-07 | 4.828314 | 4  |
| 7067_at   | YBR294W   | SUL1    | 3.549976 | 3.661181 | 3.355331 | 3.589015 | 3.211658 | 3.586264 | 3.212503 | 3.439306 | 3.492622 | 3.284362  | 3.563494  | 3.293919  | 3.417723 | 3.392497 | 3.262785 | 3.386578 | -0.0256 | 0.00416  | 0.779    | 0.076002 | 1.070273 | 13 |
| 7068_at   | YBR295W   | PCA1    | 6.67608  | 6.432868 | 5.372738 | 6.640389 | 6.643795 | 6.52039  | 6.461627 | 7.043395 | 6.774604 | 6.77294   | 7.473089  | 7.932389  | 7.900228 | 8.122994 | 8.009571 | 7.096514 | 0.501   | -0.00498 | 0.000151 | 4.30E-05 | 3.769739 | 7  |
| 7069_at   | YBR296C   | PHO89   | 5.018588 | 4.828113 | 4.715772 | 4.97028  | 4.907449 | 4.912797 | 4.975895 | 4.935016 | 4.994576 | 4.470637  | 4.78481   | 4.982065  | 4.745284 | 4.       |          |          |         |          |          |          |          |    |

|           |         |       |          |          |          |          |          |          |          |          |          |          |          |          |          |          |          |          |          |          |          |          |          |    |
|-----------|---------|-------|----------|----------|----------|----------|----------|----------|----------|----------|----------|----------|----------|----------|----------|----------|----------|----------|----------|----------|----------|----------|----------|----|
| 7101_at   | YBR283C | SSH1  | 9.477252 | 9.7651   | 9.154253 | 9.199723 | 9.29953  | 9.318599 | 9.366118 | 8.60787  | 9.126375 | 9.126688 | 9.203475 | 8.06408  | 9.079129 | 8.557336 | 9.085487 | -0.214   | -0.0199  | 0.0153   | 0.002257 | 1.761555 | 16       |    |
| 7102_at   | YBR237W | PRP5  | 3.979707 | 4.158603 | 4.863616 | 4.004496 | 4.080082 | 3.743264 | 4.730048 | 4.417418 | 4.018619 | 4.638221 | 4.124344 | 4.301562 | 4.998349 | 4.517665 | 4.598403 | 4.254794 | 0.117    | 0.0668   | 0.122    | 0.014386 | 1.433947 | 13 |
| 7103_at   | YBR238C |       | 8.490852 | 7.948128 | 7.122573 | 7.247294 | 7.308401 | 7.478151 | 7.44778  | 7.635474 | 7.684598 | 7.2494   | 7.455631 | 7.71328  | 8.542767 | 7.691336 | 8.526264 | 7.439196 | 0.107    | 0.166    | 0.0267   | 0.003703 | 1.759126 | 13 |
| 7104_at   | YBR239C |       | 6.224005 | 6.217267 | 6.450775 | 6.450775 | 6.939791 | 6.503817 | 7.35712  | 6.981417 | 7.275078 | 7.375017 | 7.878364 | 7.174241 | 7.730316 | 7.152326 | 7.43515  | 6.98151  | 0.244    | -0.188   | 1.13E-05 | 0.52E-06 | 2.330824 | 9  |
| 7105_at   | YBR240C | TH12  | 6.356653 | 5.759548 | 6.335617 | 7.181988 | 7.294869 | 6.964598 | 7.388985 | 7.078727 | 7.315916 | 6.188908 | 6.45579  | 6.582726 | 8.525413 | 5.576293 | 6.300137 | 6.979367 | -0.145   | -0.252   | 0.00291  | 0.00053  | 2.294814 | 15 |
| 7106_at   | YBR241C |       | 7.695664 | 7.533072 | 7.462861 | 9.472628 | 9.13695  | 9.152328 | 10.507   | 10.20292 | 9.961033 | 10.02557 | 10.16821 | 10.19593 | 9.399604 | 9.041972 | 9.519555 | 10.26046 | 0.467    | -0.483   | 1.84E-07 | 2.55E-07 | 6.809048 | 10 |
| 7107_at   | YBR242W |       | 8.787028 | 8.615728 | 8.321396 | 9.483802 | 9.505687 | 8.495323 | 10.31872 | 10.15024 | 9.42834  | 10.66184 | 10.29532 | 10.15732 | 8.40774  | 8.099801 | 8.210357 | 10.0747  | -0.00498 | -0.469   | 0.000271 | 7.00E-05 | 3.12793  | 11 |
| 7108_at   | YBR243C | ALG7  | 6.438665 | 6.815498 | 7.289902 | 6.107091 | 5.975778 | 6.142886 | 5.295519 | 5.192699 | 5.212345 | 4.998135 | 5.257982 | 5.306572 | 5.36965  | 5.150266 | 5.694692 | 5.234538 | -0.384   | 0.249    | 2.65E-05 | 1.03E-05 | 3.385806 | 14 |
| 7109_at   | YBR244W | GPX2  | 5.828612 | 5.119515 | 5.89736  | 4.980611 | 4.965048 | 4.45871  | 4.699875 | 4.898939 | 4.596087 | 5.145982 | 4.85933  | 4.984898 | 4.787633 | 4.525938 | 4.626679 | 4.742392 | -0.197   | 0.0998   | 0.0161   | 0.002359 | 1.747733 | 14 |
| 7110_at   | YBR245C | ISW1  | 4.887539 | 5.19654  | 5.924456 | 5.101449 | 4.966041 | 4.785009 | 4.65021  | 4.830731 | 4.468265 | 4.287458 | 4.592606 | 4.825894 | 4.556945 | 4.341566 | 4.428812 | 4.60031  | -0.231   | 0.0801   | 0.00313  | 0.000567 | 1.84381  | 16 |
| 7111_at   | YBR246W |       | 7.583954 | 7.657273 | 7.976125 | 7.510067 | 7.478911 | 7.375439 | 7.175676 | 7.169814 | 7.208267 | 7.068207 | 6.886557 | 7.140012 | 6.170708 | 6.041784 | 6.415288 | 7.097883 | -0.388   | -0.0339  | 1.06E-07 | 1.78E-07 | 2.796194 | 16 |
| 7112_at   | YBR247C | ENP1  | 7.528924 | 7.412143 | 7.036272 | 6.83377  | 6.843004 | 6.596069 | 6.929959 | 6.983917 | 6.668107 | 7.024508 | 6.592418 | 6.249384 | 6.263966 | 6.089673 | 5.684053 | 6.639961 | -0.318   | 0.00365  | 0.000254 | 6.63E-05 | 2.322165 | 16 |
| 7113_at   | YBR248C | HIS7  | 8.545289 | 8.736932 | 9.072689 | 8.301648 | 8.366583 | 8.233074 | 7.834791 | 7.595647 | 7.80664  | 7.920809 | 7.597383 | 7.263624 | 6.929381 | 7.239495 | 6.780242 | 7.678605 | -0.466   | 0.0584   | 3.42E-06 | 2.11E-06 | 3.437968 | 16 |
| 7114_at   | YBR249C | ARO4  | 9.934257 | 10.17395 | 10.21317 | 9.158025 | 9.184804 | 9.498269 | 8.616363 | 8.091728 | 8.842893 | 8.216556 | 8.046138 | 8.312205 | 6.708971 | 7.404214 | 7.390191 | 8.343717 | -0.758   | 0.0828   | 2.08E-07 | 2.77E-07 | 4.758699 | 18 |
| 7115_at   | YBR250W | SPO23 | 5.078794 | 4.693193 | 4.187745 | 4.77304  | 4.906093 | 5.290424 | 4.545216 | 4.948603 | 5.14333  | 5.213932 | 5.346642 | 5.137127 | 6.02828  | 6.59329  | 5.644296 | 5.126104 | 0.36     | 0.07     | 0.000326 | 8.17E-05 | 2.599356 | 7  |
| 7116_at   | YBR251W | MRP55 | 5.29427  | 5.545307 | 5.103849 | 5.9827   | 6.074348 | 5.829928 | 5.469441 | 5.638866 | 5.633355 | 5.67662  | 5.10772  | 5.368554 | 5.057771 | 5.282826 | 5.085055 | 5.636026 | -0.0913  | -0.103   | 0.0303   | 0.004156 | 1.485377 | 12 |
| 7117_at   | YBR252W | SSH1  | 8.815391 | 8.929297 | 9.528025 | 8.280195 | 8.410563 | 8.694004 | 6.756686 | 6.922179 | 7.194184 | 6.349387 | 6.514806 | 6.543532 | 6.181674 | 6.485747 | 6.0667   | 6.865928 | -0.797   | 0.234    | 6.72E-06 | 3.51E-06 | 8.267631 | 18 |
| 7118_at   | YBR253W | SRB6  | 7.306418 | 5.742271 | 7.52638  | 7.781715 | 7.706985 | 7.754695 | 7.88607  | 7.556651 | 7.347381 | 7.706048 | 7.250226 | 6.946013 | 6.697347 | 7.267023 | 7.09918  | 6.767096 | -0.114   | -0.116   | 0.00535  | 0.000903 | 1.588203 | 12 |
| 7119_at   | YBR254C | TR50  | 7.774536 | 7.258664 | 6.687047 | 6.959872 | 7.05204  | 7.120489 | 6.541462 | 6.679356 | 6.74301  | 6.603263 | 6.123411 | 6.394147 | 5.879334 | 6.080912 | 5.496344 | 6.582965 | -0.374   | -0.0123  | 7.69E-05 | 2.46E-05 | 6.97285  | 16 |
| 7120_at   | YBR255W |       | 4.546931 | 4.504983 | 3.842743 | 4.447692 | 4.727210 | 4.537674 | 4.922393 | 4.853139 | 4.775341 | 5.135139 | 4.84208  | 4.473272 | 4.683462 | 4.505218 | 4.525004 | 4.86446  | 0.0817   | -0.12    | 0.00821  | 0.001312 | 1.525003 | 12 |
| 7121_at   | YBR256C | RIB5  | 8.492142 | 8.132399 | 8.720998 | 7.957652 | 7.927818 | 7.897205 | 8.441826 | 8.006832 | 8.427601 | 9.087637 | 8.59643  | 8.880314 | 8.041894 | 7.979358 | 8.100417 | 8.406723 | -0.0337  | -0.067   | 0.549    | 0.05338  | 1.23627  | 13 |
| 7122_at   | YBR257W | POP4  | 6.162268 | 6.371732 | 5.973197 | 6.012467 | 6.080668 | 5.604739 | 6.359805 | 6.242155 | 6.007696 | 6.517619 | 6.23857  | 6.394341 | 6.095013 | 6.428568 | 6.461964 | 6.200845 | 0.0762   | 0.00723  | 0.294    | 0.031516 | 1.223804 | 13 |
| 7123_at   | YBR258C | SHG1  | 4.066891 | 3.876284 | 3.674554 | 3.554739 | 3.584881 | 3.337354 | 3.441677 | 3.510555 | 3.166458 | 3.124904 | 3.186011 | 3.184093 | 2.915217 | 3.214438 | 2.968189 | 3.236956 | -0.219   | 0.059    | 1.45E-05 | 6.31E-06 | 1.786506 | 16 |
| 7124_at   | YBR214W | SDS24 | 7.71894  | 7.869088 | 7.922809 | 7.689907 | 8.945022 | 8.945022 | 9.30581  | 9.280966 | 9.053796 | 9.953296 | 9.841835 | 9.493809 | 9.793537 | 10.28544 | 9.948937 | 9.503695 | 0.577    | -0.172   | 1.33E-08 | 4.68E-08 | 4.611272 | 7  |
| 7125_at   | YBR215W | HPC2  | 6.261698 | 6.54164  | 6.312961 | 6.377321 | 6.368479 | 6.407039 | 6.009191 | 6.193079 | 6.400354 | 6.4121   | 6.301633 | 6.239743 | 5.610703 | 6.30382  | 5.842703 | 6.277694 | -0.108   | -0.036   | 0.0309   | 0.004231 | 1.330901 | 13 |
| 7126_at   | YBR216C | YBP1  | 4.06609  | 3.942091 | 3.345848 | 3.946294 | 3.999765 | 3.823036 | 3.621191 | 3.71613  | 3.469975 | 3.96554  | 3.931997 | 4.057909 | 3.331565 | 3.526654 | 3.467521 | 3.959045 | -0.0776  | -0.0957  | 0.0308   | 0.004218 | 1.330901 | 12 |
| 7127_at   | YBR217W | ATG10 | 5.880042 | 5.070481 | 4.678107 | 4.986479 | 5.269333 | 4.497038 | 4.908724 | 5.207049 | 5.145033 | 5.663262 | 5.229704 | 4.678181 | 4.259285 | 4.854461 | 4.208385 | 5.067107 | -0.136   | -0.0853  | 0.105    | 0.012568 | 1.543203 | 15 |
| 7128_at   | YBR218C | PGY2  | 8.826151 | 9.176834 | 9.127574 | 8.867937 | 8.855548 | 8.699057 | 8.088256 | 8.265951 | 8.986308 | 8.496597 | 8.638138 | 9.203181 | 8.483658 | 8.455803 | 8.861167 | 8.60266  | -0.0883  | 0.0588   | 0.273    | 0.029574 | 1.328934 | 13 |
| 7129_at   | YBR220C |       | 8.03102  | 7.631026 | 6.985706 | 7.402092 | 7.603676 | 7.376487 | 7.575272 | 7.504185 | 7.677362 | 7.823187 | 7.583562 | 7.03397  | 6.811613 | 6.826422 | 6.498238 | 7.489892 | -0.199   | -0.101   | 0.00523  | 0.000887 | 1.801751 | 15 |
| 7130_g_at | YBR220C |       | 7.437698 | 7.21746  | 6.808313 | 6.94306  | 7.131851 | 7.05197  | 7.295801 | 7.082727 | 7.126376 | 7.444918 | 6.985016 | 6.715942 | 6.312753 | 6.40455  | 6.219107 | 7.062668 | -0.201   | -0.0932  | 0.00607  | 0.00151  | 1.780052 | 15 |
| 7131_at   | YBR221C | PDB1  | 8.855085 | 8.890984 | 8.539729 | 8.718991 | 8.759595 | 8.625648 | 8.711613 | 8.377583 | 8.602509 | 8.378967 | 8.373734 | 8.78135  | 7.593161 | 7.639589 | 7.73534  | 8.537914 | -0.275   | -0.0908  | 3.18E-06 | 2.01E-06 | 2.0715   | 15 |
| 7132_at   | YBR222C | PCS60 | 9.599525 | 9.444958 | 9.193601 | 9.698241 | 9.627387 | 9.853453 | 9.314201 | 9.472769 | 9.8164   | 9.141699 | 9.307456 | 9.695515 | 8.695065 | 9.020921 | 9.187898 | 9.529639 | -0.135   | -0.0893  | 0.00621  | 0.01003  | 1.552674 | 15 |
| 7133_at   | YBR223C | TDP1  | 6.780295 | 6.589726 | 5.738936 | 6.752228 | 6.621537 | 6.790985 | 6.753193 | 6.857181 | 6.916621 | 6.724974 | 7.215042 | 6.703424 | 6.660503 | 6.95121  | 6.574936 | 6.889541 | 0.0902   | -0.093   | 0.0759   | 0.009395 | 1.447822 | 16 |
| 7134_at   | YBR224W |       | 4.651759 | 4.536789 | 4.22044  | 4.705991 | 4.486595 | 4.926695 | 4.200373 | 4.174275 | 4.190723 | 4.192268 | 4.394116 | 3.929791 | 3.905674 | 4.204297 | 4.201929 | 4.291195 | -0.146   | -0.00856 | 0.0367   | 0.004919 | 1.472256 | 16 |
| 7135_at   | YBR225W |       | 5.3176   | 5.269486 | 4.602202 | 5.309773 | 5.444675 | 5.319045 | 5.639064 | 5.768097 | 5.435275 | 5.554935 | 5.748911 | 5.817076 | 5.772385 | 6.106188 | 5.819107 | 5.66419  | 0.217    | -0.0511  | 0.000795 | 0.000374 | 1.777596 | 9  |
| 7136_at   | YBR226C |       | 4.889259 | 5.062596 | 4.324927 | 4.923831 | 4.889116 | 4.97328  | 4.592391 | 4.774271 | 4.743991 | 4.813183 | 4.873565 | 4.586686 | 4.835278 | 5.120913 | 4.811108 | 4.791673 | 0.0349   | 0.0209   | 0.593    | 0.059304 | 1.115368 | 13 |
| 7137_at   | YBR227C | MCX1  | 6.26117  | 6.230032 | 6.331376 | 6.123819 | 6.262752 | 5.99865  | 6.27573  | 6.121237 | 5.854886 | 6.064138 | 5.964584 | 5.720527 | 5.824898 | 5.958522 | 5.555113 | 5.988951 | -0.133   | 0.0107   | 0.00344  | 0.000616 | 1.421572 | 16 |
| 7138_at   | YBR228W | SLX1  | 4.698222 | 4.64089  | 4.19009  | 5.102876 | 5.035227 | 4.887433 | 4.542011 | 5.300017 | 4.833323 | 5.373288 | 5.352177 | 5.529266 | 4.708855 | 4.651483 | 4.577676 | 5.336624 | 0.0579   | -0.212   | 0.006611 | 0.00014  | 1.810662 | 16 |
| 7139_at   | YBR229C | ROT2  | 5.774057 | 6.159343 | 5.564194 | 5.856687 | 5.808301 | 6.832339 | 6.110234 | 5.982555 | 5.82197  | 5.322656 | 5.410227 | 5.85747  | 4.897007 | 5.574518 | 5.169827 | 5.737938 | -0.178   | -0.0582  | 0.0612   | 0.001018 | 1.630365 | 16 |
| 7140_at   | YBR230C | OM14  | 6.577729 | 6.456257 | 5.990868 | 6.236837 | 6.011406 | 7.466177 | 9.105372 | 9.626529 | 8.825055 | 10.29132 | 10.14083 | 10.32963 | 8.379273 | 8.491476 | 8.049057 | 9.675077 | 0.613    | -0.66    | 2.61E-06 | 1.72E-06 | 13.2752  | 10 |
| 7141_at   | YBR231C | SWC5  | 6.046066 | 6.143381 | 6.525404 | 6.584142 | 6.646282 | 6.730756 | 6.905179 | 6.783375 | 6.281622 | 7.078335 | 6.53257  | 6.345439 | 6.231061 |          |          |          |          |          |          |          |          |    |

|           |                |          |          |          |          |          |          |          |          |          |          |          |          |          |          |          |          |         |          |          |          |          |    |
|-----------|----------------|----------|----------|----------|----------|----------|----------|----------|----------|----------|----------|----------|----------|----------|----------|----------|----------|---------|----------|----------|----------|----------|----|
| 7173_at   | YBR171W SEC66  | 7.41173  | 7.695634 | 7.92058  | 7.382643 | 7.403068 | 7.340183 | 7.163578 | 7.171529 | 6.866595 | 6.511873 | 6.359322 | 6.673808 | 5.132651 | 5.275507 | 5.030635 | 6.787003 | -0.663  | -0.102   | 2.41E-10 | 5.34E-09 | 5.796841 | 18 |
| 7174_at   | YBR172C SMY2   | 5.649794 | 6.06774  | 6.620634 | 5.909073 | 5.989918 | 5.939327 | 6.103513 | 6.107967 | 5.484611 | 6.165194 | 5.462076 | 5.776814 | 6.17679  | 6.112356 | 5.904935 | 5.867863 | -0.2225 | 0.061    | 0.494    | 0.050354 | 1.201756 | 13 |
| 7175_at   | YBR173C UMP1   | 6.232984 | 6.024235 | 7.452338 | 7.007577 | 6.710717 | 7.47428  | 6.828799 | 6.708225 | 6.71248  | 6.636672 | 6.410863 | 7.591    | 6.071606 | 5.931636 | 6.509554 | 6.916302 | -0.109  | -0.146   | 0.106    | 0.012684 | 1.689312 | 12 |
| 7176_at   | YBR174C        | 3.741302 | 3.685696 | 5.466515 | 6.399521 | 3.748074 | 3.639059 | 3.827147 | 3.719449 | 3.669491 | 3.659422 | 3.497591 | 3.715191 | 3.496617 | 3.488709 | 3.392518 | 3.588773 | -0.197  | 0.0758   | 0.0865   | 0.010758 | 1.686153 | 16 |
| 7177_at   | YBR175W SMD3   | 7.154373 | 6.705142 | 6.942035 | 6.997919 | 6.852816 | 6.660688 | 7.180285 | 6.837378 | 6.707347 | 7.206643 | 7.07335  | 6.886271 | 6.396129 | 6.066822 | 6.037496 | 6.920296 | -0.169  | -0.108   | 0.00181  | 0.003053 | 1.719752 | 15 |
| 7178_at   | YBR176W EWC31  | 7.630689 | 7.655043 | 7.970903 | 7.865393 | 7.918896 | 7.602302 | 7.993826 | 7.892351 | 7.441828 | 7.272161 | 6.854392 | 6.252619 | 6.439882 | 7.599027 |          |          | -0.336  | -0.127   | 1.72E-06 | 1.26E-06 | 2.475617 | 15 |
| 7179_at   | YBR177C EHT1   | 5.972785 | 6.16519  | 6.561127 | 9.411516 | 9.086257 | 8.096852 | 9.316769 | 9.326457 | 9.573739 | 10.10914 | 10.03698 | 10.49232 | 8.413835 | 8.076639 | 8.560272 | 10.04169 | 0.565   | -0.753   | 1.63E-08 | 5.15E-08 | 15.34331 | 10 |
| 7180_at   | YBR178W        | 3.665754 | 3.783848 | 5.46053  | 4.149767 | 4.348479 | 4.236366 | 3.852738 | 4.064322 | 3.962006 | 3.625602 | 3.917272 | 3.782601 | 3.794437 | 3.79196  | 3.814027 | 3.903949 | -0.152  | 0.0428   | 0.231    | 0.025424 | 1.495412 | 16 |
| 7181_at   | YBR179C FZO1   | 6.197713 | 6.394658 | 6.822488 | 7.065308 | 7.110878 | 6.616024 | 7.566564 | 7.419973 | 7.288852 | 7.829335 | 7.608356 | 7.423813 | 6.929939 | 6.539638 | 6.77485  | 7.489479 | 0.105   | -0.247   | 0.000307 | 7.75E-05 | 2.149906 | 12 |
| 7182_at   | YBR180W DTR1   | 4.10197  | 4.069798 | 5.096623 | 4.333464 | 4.052459 | 4.409437 | 4.219131 | 4.18839  | 4.193308 | 4.685309 | 4.686899 | 4.283555 | 4.30432  | 4.460339 | 4.442204 | 4.348863 | 0.0255  | 0.0145   | 0.864    | 0.083201 | 1.081611 | 13 |
| 7183_at   | YBR182C SMP1   | 8.818743 | 8.147655 | 7.073425 | 8.058417 | 8.423893 | 8.018077 | 9.05602  | 9.327408 | 8.967734 | 10.11362 | 9.861244 | 8.990881 | 9.452401 | 9.851287 | 9.722319 | 9.244766 | 0.496   | -0.122   | 0.0024   | 0.00045  | 3.724103 | 7  |
| 7184_at   | YBR183W YPC1   | 9.524197 | 9.100367 | 7.701778 | 9.998371 | 9.990969 | 9.342686 | 10.17462 | 10.26417 | 10.29763 | 11.24299 | 11.08257 | 11.06945 | 10.12909 | 10.67534 | 10.39263 | 10.71809 | 0.477   | -0.316   | 0.000206 | 5.55E-05 | 4.626139 | 10 |
| 7185_at   | YBR184W        | 3.369171 | 3.365997 | 2.830271 | 3.181505 | 3.202262 | 3.303689 | 3.07798  | 3.341019 | 3.386793 | 3.757743 | 3.642461 | 3.444137 | 3.644418 | 3.589276 | 3.118728 | 3.426843 | 0.0951  | -0.0322  | 0.127    | 0.014936 | 1.286666 | 13 |
| 7186_at   | YBR185C MBA1   | 6.924622 | 6.934002 | 6.195622 | 7.394173 | 7.461864 | 7.824725 | 7.108225 | 7.285694 | 7.569647 | 7.452965 | 7.193639 | 7.462592 | 6.445406 | 6.95845  | 6.414514 | 7.491662 | -0.0422 | -0.227   | 0.00136  | 0.000277 | 1.808767 | 12 |
| 7187_at   | YBR186W PCH2   | 3.057282 | 3.040054 | 2.613066 | 2.676975 | 2.696586 | 2.852899 | 2.82464  | 2.798884 | 3.106375 | 3.003734 | 3.186099 | 2.875084 | 2.983553 | 2.84567  | 2.849951 | 2.910639 | 0.02    | -0.00705 | 0.838    | 0.08103  | 1.054488 | 13 |
| 7188_at   | YBR187W GDT1   | 9.917603 | 9.82843  | 9.624238 | 9.082446 | 9.220887 | 9.165909 | 8.863729 | 8.574017 | 8.530219 | 8.699091 | 8.282844 | 8.21806  | 8.047291 | 8.143558 | 7.81027  | 8.514537 | -0.467  | -0.106   | 1.92E-07 | 2.63E-07 | 3.44662  | 18 |
| 7189_at   | YBR188C NCT20  | 5.264804 | 5.370437 | 5.504455 | 5.695571 | 5.72918  | 5.879396 | 5.374234 | 5.625502 | 5.466824 | 5.771478 | 5.484514 | 5.380683 | 6.028089 | 5.808474 | 4.617776 | 5.599126 | -0.161  | -0.14    | 0.000122 | 3.58E-05 | 1.821825 | 15 |
| 7190_i_at | YBR189W RPS5B  | 10.9681  | 11.28266 | 11.67247 | 10.4777  | 10.60344 | 11.25159 | 9.808836 | 9.984013 | 9.797715 | 8.327794 | 8.391464 | 8.874782 | 7.202829 | 7.82221  | 8.163969 | 9.290262 | -1.01   | 0.0751   | 5.44E-07 | 5.42E-07 | 14.69315 | 20 |
| 7191_f_at | YBR189W RPS5B  | 11.55433 | 11.76196 | 12.00679 | 11.06941 | 11.18472 | 11.53643 | 10.16553 | 10.38799 | 10.21736 | 9.32694  | 9.33048  | 9.444825 | 8.960374 | 9.315125 | 9.341315 | 9.920144 | -0.74   | 0.168    | 1.11E-06 | 9.11E-07 | 7.115205 | 18 |
| 7192_at   | YBR190W        | 4.867904 | 4.981497 | 4.58946  | 4.91333  | 4.574554 | 4.745942 | 4.262124 | 4.443497 | 4.615417 | 4.68607  | 4.609535 | 4.681759 | 4.559928 | 4.733448 | 4.6973   | 4.579514 | -0.0325 | 0.0447   | 0.254    | 0.027659 | 1.174075 | 13 |
| 7193_at   | YBR147W        | 7.833705 | 7.654189 | 7.644932 | 8.228047 | 8.303212 | 7.603981 | 8.427168 | 8.060147 | 8.395767 | 7.865113 | 7.710301 | 8.608981 | 6.051258 | 6.601514 | 6.95413  | 8.091683 | -0.227  | -0.22    | 1.97E-05 | 8.09E-06 | 2.457791 | 15 |
| 7194_at   | YBR148W YSW1   | 3.705858 | 3.868709 | 4.112541 | 4.268526 | 4.075272 | 4.031656 | 4.452317 | 4.16867  | 4.122619 | 4.449565 | 4.15243  | 4.440975 | 4.450344 | 4.343604 | 4.264923 | 4.308688 | 0.121   | -0.051   | 0.0028   | 0.000514 | 1.37813  | 13 |
| 7195_at   | YBR149W ARA1   | 9.326716 | 9.281234 | 9.16423  | 9.977356 | 9.999349 | 9.621955 | 9.480138 | 9.437806 | 9.712556 | 9.810643 | 9.602314 | 9.685888 | 7.555092 | 7.920951 | 8.010448 | 9.718417 | -0.353  | -0.321   | 1.97E-07 | 2.68E-07 | 3.85247  | 17 |
| 7196_at   | YBR150C TBS1   | 4.736327 | 4.914489 | 4.641608 | 4.859762 | 4.585762 | 5.253321 | 4.459638 | 4.856528 | 5.066494 | 5.191267 | 5.398797 | 5.069961 | 6.463355 | 6.748258 | 6.460177 | 5.156527 | 0.464   | 0.141    | 2.79E-07 | 3.5E-07  | 3.420295 | 7  |
| 7197_at   | YBR151W APD1   | 8.363346 | 8.310259 | 7.847381 | 8.889152 | 9.026464 | 8.24676  | 8.471604 | 8.478208 | 9.186879 | 9.47952  | 9.081662 | 9.278416 | 8.59204  | 8.87009  | 9.273146 | 9.1074   | 0.203   | -0.153   | 0.00304  | 0.000551 | 2.00563  | 9  |
| 7198_at   | YBR152W SPP381 | 2.149136 | 2.96417  | 2.458969 | 2.588779 | 2.71195  | 2.741246 | 2.54677  | 2.85066  | 3.057619 | 2.849822 | 3.079342 | 3.795425 | 3.30447  | 3.398218 | 3.162392 | 2.841458 | 0.145   | 0.0467   | 0.00242  | 0.000454 | 1.470461 | 13 |
| 7199_at   | YBR153W RIB7   | 7.681596 | 7.479797 | 7.432266 | 7.290477 | 7.360319 | 7.400671 | 6.967668 | 7.138258 | 7.28573  | 7.350237 | 7.230864 | 6.99347  | 8.134234 | 8.172919 | 7.719564 | 7.182709 | 0.109   | 0.164    | 6.92E-05 | 2.26E-05 | 1.575602 | 13 |
| 7200_at   | YBR154C RPB5   | 8.834748 | 9.080571 | 9.163545 | 8.227685 | 8.553335 | 8.207568 | 7.847437 | 7.879199 | 7.520522 | 7.507368 | 6.913416 | 6.259519 | 6.23109  | 6.179871 | 6.099185 | 7.297324 | -0.783  | 0.0935   | 6.46E-08 | 1.27E-07 | 7.975183 | 18 |
| 7201_at   | YBR155W CNS1   | 6.580733 | 6.918982 | 6.670427 | 6.076581 | 6.160355 | 6.113003 | 6.248378 | 6.21604  | 5.77323  | 6.304763 | 6.023659 | 5.733586 | 5.557816 | 5.763615 | 5.116466 | 5.960045 | -0.291  | 0.0354   | 0.000362 | 8.93E-05 | 2.165206 | 16 |
| 7202_at   | YBR156C SLI15  | 3.617769 | 3.701052 | 3.208715 | 3.452982 | 3.40045  | 3.43161  | 3.506811 | 3.700177 | 3.387831 | 3.309158 | 3.377611 | 3.286189 | 3.169883 | 3.524847 | 3.119088 | 3.406305 | -0.0678 | -0.00472 | 0.157    | 0.017949 | 1.196783 | 13 |
| 7203_at   | YBR157C ICS2   | 3.999011 | 3.930785 | 3.572349 | 3.836838 | 3.888149 | 3.702279 | 3.804168 | 3.948487 | 3.943684 | 4.016757 | 4.29427  | 3.656749 | 4.370685 | 4.082964 | 4.130157 | 3.92763  | 0.0993  | 0.0226   | 0.0403   | 0.005352 | 1.301158 | 13 |
| 7204_at   | YBR158W AMN1   | 6.618622 | 6.744542 | 5.859886 | 6.461864 | 6.486903 | 6.108321 | 6.960081 | 6.801221 | 6.270089 | 5.785705 | 6.802423 | 6.664474 | 5.703048 | 5.848185 | 5.34072  | 5.966563 | -0.234  | 0.0159   | 0.00323  | 0.000582 | 1.860789 | 16 |
| 7205_at   | YBR159W IFA38  | 9.766722 | 9.751091 | 9.751882 | 9.398901 | 9.25679  | 9.16732  | 9.80214  | 8.814343 | 8.985595 | 8.062731 | 8.011425 | 8.266792 | 6.999114 | 7.424181 | 7.192258 | 8.539938 | -0.703  | -0.0142  | 1E-09    | 1.05E-08 | 6.44584  | 18 |
| 7206_at   | YBR160W CDC28  | 8.021007 | 8.175186 | 7.957483 | 8.139898 | 8.265736 | 7.976938 | 7.361491 | 7.756034 | 7.712157 | 6.536744 | 6.833411 | 6.403527 | 5.85593  | 6.574926 | 6.192476 | 7.15417  | -0.555  | 0.00501  | 3.29E-05 | 1.32E-05 | 4.358196 | 18 |
| 7207_at   | YBR161W CSH1   | 6.562756 | 6.815642 | 6.176178 | 6.858174 | 6.94761  | 6.841294 | 6.897077 | 6.796267 | 6.667077 | 5.889301 | 6.145196 | 5.951409 | 5.778347 | 5.888352 | 5.710454 | 6.480148 | -0.255  | -0.0814  | 0.00171  | 0.000337 | 1.96526  | 16 |
| 7208_at   | YBR162C TOS1   | 9.092315 | 8.983884 | 8.073221 | 9.249803 | 9.118704 | 9.135531 | 8.439216 | 8.634297 | 8.369843 | 8.152289 | 8.321823 | 9.172893 | 8.058646 | 8.009854 | 8.971766 | 8.679368 | -0.129  | -0.0319  | 0.357    | 0.03757  | 1.407874 | 16 |
| 7209_at   | YBR162W YSW6   | 8.455968 | 8.785392 | 9.232091 | 8.720407 | 8.595421 | 8.786979 | 8.291348 | 8.376904 | 7.976739 | 8.686229 | 8.513589 | 8.534497 | 8.702355 | 8.595205 | 7.749037 | 8.443469 | -0.0276 | 0.087    | 0.156    | 0.017877 | 1.290072 | 13 |
| 7210_at   | YBR163W DEM1   | 7.53496  | 7.463491 | 6.862948 | 7.408765 | 7.5021   | 7.195837 | 7.534426 | 7.340597 | 7.437576 | 7.415684 | 7.600542 | 7.328212 | 7.008221 | 6.841913 | 6.940219 | 7.432705 | -0.0824 | -0.0895  | 0.00868  | 0.001373 | 1.614677 | 12 |
| 7211_at   | YBR164C ARL1   | 9.545747 | 9.698125 | 9.671686 | 9.022277 | 9.165125 | 7.866884 | 8.49793  | 8.79692  | 8.055542 | 8.819767 | 7.51441  | 7.003801 | 6.468078 | 6.722116 | 6.22758  | 7.897646 | -0.86   | 0.0478   | 1.45E-08 | 4.80E-08 | 9.784396 | 18 |
| 7212_at   | YBR165W UBS1   | 5.704178 | 5.757855 | 5.515655 | 5.642162 | 5.755348 | 5.401918 | 5.677864 | 5.591651 | 5.552799 | 6.352744 | 5.784818 | 5.871754 | 6.562158 | 6.211537 | 6.404315 | 5.789977 | 0.211   | 0.0627   | 0.00198  | 5.38E-05 | 1.749286 | 8  |
| 7213_at   | YBR166C TYR1   | 6.785842 | 7.051752 | 6.351856 | 6.675915 | 6.896195 | 5.958082 | 6.574347 | 6.428672 | 5.992915 | 6.231868 | 6.052388 | 5.923016 | 5.710661 | 5.325952 | 5.584264 | 6.210529 | -0.21   | -0.201   | 0.000805 | 0.000176 | 2.273158 | 16 |
| 7214_at   | YBR167C POP7   | 5.06133  | 5.507155 | 5.60114  |          |          |          |          |          |          |          |          |          |          |          |          |          |         |          |          |          |          |    |

|           |         |        |          |          |          |          |          |          |          |          |          |           |          |           |          |          |          |          |         |          |          |          |          |    |
|-----------|---------|--------|----------|----------|----------|----------|----------|----------|----------|----------|----------|-----------|----------|-----------|----------|----------|----------|----------|---------|----------|----------|----------|----------|----|
| 7245_at   | YBR109C | CMC1   | 9.383015 | 9.857969 | 10.6065  | 9.72601  | 9.528675 | 9.545331 | 9.62408  | 9.600996 | 9.508486 | 9.263022  | 9.395153 | 10.00497  | 8.830664 | 8.851655 | 9.070244 | 9.54743  | -0.252  | -0.0324  | 0.0064   | 0.001058 | 1.952615 | 16 |
| 7246_at   | YBR110W | ALG1   | 5.619498 | 5.828145 | 6.009028 | 5.76857  | 5.950047 | 5.922102 | 6.153434 | 5.71305  | 5.657455 | 5.860308  | 5.529796 | 5.591949  | 5.237314 | 5.406187 | 5.237976 | 5.690646 | -0.143  | -0.0305  | 0.0156   | 0.002293 | 1.459485 | 16 |
| 7247_at   | YBR111C | YSA1   | 10.45888 | 10.33953 | 10.90723 | 11.19731 | 11.10553 | 11.12665 | 11.48234 | 11.48863 | 11.40867 | 11.19901  | 10.92376 | 11.18071  | 9.818362 | 9.133987 | 9.379267 | 11.29294 | -0.305  | -0.363   | 2.0E-08  | 5.87E-08 | 3.908005 | 17 |
| 7248_at   | YBR112C | CYC8   | 7.256389 | 7.005979 | 6.830572 | 6.381052 | 6.492648 | 6.308337 | 6.818587 | 6.764574 | 6.493503 | 6.175022  | 6.18568  | 6.199099  | 5.994326 | 5.313601 | 5.072362 | 6.240436 | -0.442  | -0.0259  | 2.08E-06 | 1.46E-06 | 3.229508 | 16 |
| 7249_at   | YBR113W |        | 4.816104 | 4.58271  | 5.795447 | 4.668963 | 4.716572 | 4.532707 | 4.665241 | 4.44823  | 4.563048 | 4.387652  | 4.283906 | 4.187286  | 4.413802 | 4.068296 | 4.221808 | 4.377784 | -0.22   | 0.0745   | 0.00517  | 0.000879 | 1.793959 | 16 |
| 7250_at   | YBR114W | RAD16  | 4.066218 | 4.011061 | 5.097481 | 4.566658 | 4.564008 | 4.385796 | 4.503209 | 4.849379 | 4.567781 | 4.806611  | 4.218405 | 4.156723  | 5.198556 | 4.95032  | 5.608471 | 4.851921 | 0.232   | -0.0107  | 0.0136   | 0.00203  | 1.851403 | 9  |
| 7251_at   | YBR115C | LYS2   | 8.239243 | 8.567787 | 8.58214  | 8.73224  | 7.797057 | 7.718814 | 7.417794 | 7.134273 | 7.608173 | 7.683375  | 6.991442 | 7.223496  | 6.4633   | 6.723892 | 6.627198 | 7.163139 | -0.489  | 0.103    | 5.29E-08 | 1.12E-07 | 3.660254 | 18 |
| 7252_at   | YBR116C |        | 6.377182 | 6.515205 | 6.399321 | 7.508093 | 7.253842 | 7.410884 | 7.9248   | 7.689546 | 7.763751 | 7.011531  | 7.538349 | 7.491782  | 7.260635 | 8.121001 | 7.6295   | 7.667278 | 0.262   | -0.164   | 0.0032   | 0.000578 | 2.265743 | 9  |
| 7253_g_at | YBR116C |        | 6.065368 | 5.896464 | 5.605224 | 7.133292 | 6.993488 | 6.856705 | 7.743095 | 7.581891 | 7.776983 | 6.788769  | 6.872627 | 7.024426  | 6.379108 | 7.128767 | 6.683129 | 7.376583 | 0.158   | -0.293   | 0.00274  | 0.000504 | 2.616956 | 12 |
| 7254_at   | YBR117C | TKL2   | 4.897607 | 4.708383 | 3.589458 | 6.168069 | 6.005871 | 5.967557 | 6.734769 | 6.662271 | 7.177697 | 6.313627  | 6.067834 | 5.974119  | 5.077486 | 5.72598  | 5.430135 | 6.611525 | 0.195   | -0.463   | 0.00037  | 9.07E-05 | 4.193766 | 10 |
| 7255_at   | YBR119W | MUD1   | 5.621486 | 5.842933 | 5.618782 | 5.581938 | 5.608569 | 5.410907 | 5.043349 | 5.199608 | 5.305666 | 6.037306  | 5.572688 | 5.326828  | 5.195426 | 6.381432 | 6.269843 | 5.493479 | 0.792   | 0.507    | 1.39E-08 | 4.72E-08 | 12.71618 | 5  |
| 7256_at   | YBR120C | CBP6   | 6.198978 | 6.710686 | 6.260678 | 7.738505 | 7.444174 | 7.628832 | 7.333059 | 7.398277 | 7.595233 | 7.651786  | 7.532234 | 7.772686  | 7.1422   | 6.988378 | 6.944565 | 7.759794 | 0.137   | -0.283   | 2.47E-05 | 9.71E-06 | 2.474566 | 12 |
| 7257_at   | YBR121C | GRS1   | 9.282359 | 9.49623  | 9.235831 | 8.777174 | 8.798304 | 8.835121 | 8.328087 | 8.387168 | 8.34733  | 7.949703  | 7.906485 | 8.241924  | 7.34093  | 7.537556 | 7.348077 | 8.184209 | -0.504  | 0.0537   | 2.51E-09 | 1.74E-08 | 3.807508 | 18 |
| 7258_at   | YBR122C | MRPL36 | 7.252881 | 7.243402 | 7.466809 | 7.933131 | 8.102459 | 7.856237 | 8.289723 | 7.849693 | 7.901273 | 7.753368  | 7.395184 | 7.762754  | 7.074883 | 7.39227  | 7.046892 | 7.913565 | -0.0767 | -0.178   | 0.000679 | 0.000152 | 1.719356 | 10 |
| 7259_at   | YBR123C | TFC1   | 6.976947 | 7.148991 | 7.073272 | 6.835386 | 6.656447 | 7.066952 | 6.942046 | 6.83347  | 6.706311 | 7.113297  | 6.673904 | 6.745431  | 6.700867 | 6.87042  | 6.662354 | 6.806507 | -0.0729 | 0.0258   | 0.0818   | 0.010055 | 1.213224 | 13 |
| 7260_at   | YBR082C | UBC4   | 10.44737 | 10.57785 | 11.0916  | 10.35541 | 10.21827 | 11.00728 | 10.26206 | 10.03787 | 10.5394  | 9.831192  | 9.839454 | 10.4223   | 10.15413 | 9.928893 | 10.96007 | 10.18206 | -0.119  | 0.0982   | 0.137    | 0.015972 | 1.535744 | 14 |
| 7261_at   | YBR083W | TEC1   | 6.74694  | 6.615507 | 7.250457 | 7.013315 | 7.116647 | 7.211653 | 7.007606 | 7.060713 | 6.835636 | 7.007395  | 6.862527 | 6.578338  | 6.328159 | 7.824865 | 5.868103 | 6.981965 | 0.299   | 0.165    | 0.000343 | 8.52E-05 | 2.476366 | 8  |
| 7262_at   | YBR084W | MIS1   | 8.162454 | 7.838262 | 7.746749 | 7.37415  | 7.536169 | 7.059003 | 7.388438 | 7.248844 | 7.071022 | 7.012091  | 6.908691 | 6.227281  | 6.089878 | 5.828192 | 5.754229 | 6.905479 | -0.523  | -0.00194 | 6.25E-07 | 6.00E-07 | 3.997872 | 18 |
| 7263_at   | YBR085W | AAC3   | 10.1171  | 10.01256 | 10.27755 | 7.428277 | 7.718204 | 7.814964 | 6.608266 | 6.213898 | 6.680255 | 6.742098  | 6.58471  | 6.453505  | 6.462805 | 6.824717 | 6.905543 | 6.405103 | -0.821  | 0.555    | 1.49E-07 | 2.22E-07 | 14.35369 | 19 |
| 7264_at   | YBR086C | IST2   | 8.1871   | 8.265772 | 7.979123 | 8.072769 | 7.950518 | 8.023527 | 7.585235 | 7.436001 | 8.089452 | 7.461827  | 7.537091 | 7.839275  | 7.335869 | 7.600667 | 7.570271 | 7.688578 | -0.177  | 0.0395   | 0.00305  | 0.000553 | 1.597155 | 16 |
| 7265_at   | YBR087W | RFC5   | 5.147191 | 5.469572 | 5.016022 | 4.93085  | 5.029026 | 4.900374 | 4.118905 | 4.379704 | 4.707567 | 4.44254   | 4.086288 | 3.953516  | 3.939656 | 3.903242 | 3.637257 | 4.331017 | -0.377  | 0.0567   | 2.48E-05 | 9.72E-06 | 2.171308 | 16 |
| 7266_at   | YBR088C | POL30  | 9.430717 | 9.84426  | 9.894088 | 9.766959 | 9.751384 | 9.351916 | 7.532478 | 8.112396 | 8.585033 | 8.464453  | 8.237195 | 8.308729  | 10.31606 | 9.846239 | 9.548289 | 8.451834 | -0.0231 | 0.39     | 0.0059   | 0.000984 | 2.665737 | 14 |
| 7267_at   | YBR089W |        | 4.430254 | 5.143816 | 3.208122 | 3.479598 | 4.246332 | 3.64853  | 3.296044 | 3.59794  | 3.660768 | 3.404159  | 3.446331 | 3.086534  | 4.989284 | 4.956462 | 4.538755 | 3.429721 | 0.117   | 0.305    | 0.00467  | 0.000804 | 2.463493 | 8  |
| 7268_at   | YBR089C | NHP6B  | 7.956937 | 7.945972 | 8.071825 | 8.289547 | 8.160106 | 8.987945 | 8.001821 | 7.808131 | 8.641932 | 8.914747  | 8.537213 | 9.515972  | 10.06888 | 9.724222 | 10.41458 | 8.693999 | 0.553   | 0.0892   | 3.89E-05 | 1.40E-05 | 4.330959 | 7  |
| 7269_g_at | YBR089C | NHP6B  | 7.304022 | 7.184012 | 7.072142 | 7.280101 | 6.924054 | 7.712043 | 7.432324 | 7.138208 | 6.615211 | 7.751105  | 7.798189 | 8.217256  | 8.746427 | 8.427675 | 8.832505 | 7.65898  | 0.402   | 0.0719   | 1.75E-06 | 3.67E-06 | 2.905205 | 7  |
| 7270_i_at | YBR090C |        | 8.929019 | 8.700133 | 8.800427 | 9.013452 | 8.916551 | 9.545154 | 9.109946 | 9.044077 | 9.615722 | 9.996978  | 9.611943 | 10.26233  | 10.9875  | 10.40864 | 11.29833 | 9.636887 | 0.509   | 0.0584   | 2.89E-06 | 1.86E-06 | 4.395655 | 7  |
| 7271_at   | YBR090C |        | 3.966735 | 4.289106 | 3.772923 | 4.204863 | 3.980104 | 4.210657 | 4.233198 | 4.076436 | 4.080033 | 4.393677  | 4.179645 | 4.092472  | 4.638236 | 4.613099 | 4.433187 | 4.197363 | 0.137   | 0.0252   | 0.00158  | 0.000316 | 1.438266 | 13 |
| 7272_at   | YBR091C | MRS5   | 7.401836 | 7.459299 | 7.250545 | 7.611139 | 7.866558 | 7.397357 | 6.836431 | 6.946971 | 6.650801 | 6.56284   | 6.184593 | 6.199875  | 5.690479 | 6.218807 | 5.377957 | 6.672218 | -0.518  | 0.00915  | 1.73E-05 | 7.27E-06 | 3.952128 | 18 |
| 7273_at   | YBR092C | PHO3   | 5.42877  | 6.184847 | 6.819126 | 5.781039 | 5.547635 | 6.326546 | 4.059984 | 3.593913 | 4.47122  | 3.299279  | 3.541161 | 3.509142  | 3.367559 | 3.628366 | 3.59773  | 3.999545 | -0.78   | 0.251    | 0.00308  | 7.78E-05 | 7.902549 | 18 |
| 7274_at   | YBR093C | PHO5   | 10.28579 | 10.28251 | 10.86734 | 10.14059 | 10.14764 | 10.23007 | 8.048078 | 8.674958 | 9.005634 | 9.680759  | 9.696488 | 10.107226 | 7.58071  | 8.20991  | 8.30441  | 8.521757 | -0.747  | 0.22     | 5.35E-05 | 1.83E-05 | 7.245183 | 18 |
| 7275_at   | YBR094W | PBY1   | 4.950049 | 5.469511 | 4.441516 | 5.066547 | 5.189524 | 4.87347  | 5.26143  | 4.878071 | 5.016476 | 4.371215  | 4.567537 | 4.833351  | 4.151332 | 4.310077 | 4.331835 | 4.838736 | -0.205  | -0.0605  | 0.00514  | 0.000874 | 1.722565 | 16 |
| 7276_at   | YBR095C | RXT2   | 8.462381 | 8.313377 | 7.424188 | 7.990053 | 7.585059 | 7.368772 | 8.507013 | 8.681153 | 7.777464 | 9.133955  | 8.733652 | 8.066408  | 8.601045 | 8.372473 | 8.133342 | 8.343947 | 0.137   | -0.0443  | 0.366    | 0.038405 | 1.437348 | 13 |
| 7277_at   | YBR096W |        | 7.571895 | 7.455951 | 7.551486 | 8.518915 | 8.315177 | 7.24759  | 8.153496 | 8.168814 | 8.104523 | 9.259027  | 8.778194 | 9.300287  | 7.550014 | 7.860401 | 7.647185 | 8.621966 | 0.124   | -0.286   | 0.00652  | 0.001076 | 2.440234 | 12 |
| 7278_at   | YBR097W | VPS15  | 6.467596 | 6.519718 | 6.104877 | 6.852848 | 6.736164 | 6.592847 | 6.730263 | 6.835909 | 6.385536 | 6.176942  | 6.346444 | 6.5084    | 5.969941 | 6.197306 | 6.300227 | 6.566104 | -0.109  | -0.092   | 0.00572  | 0.000958 | 1.49096  | 12 |
| 7279_at   | YBR098W | MMS4   | 2.792614 | 2.795161 | 2.449662 | 2.716106 | 2.872573 | 2.513719 | 2.790926 | 2.982012 | 2.775439 | 2.733363  | 2.68896  | 2.634791  | 2.71601  | 2.730246 | 2.725997 | 2.753997 | 0.00426 | -0.0146  | 0.81     | 0.078598 | 1.04294  | 13 |
| 7280_at   | YBR099C |        | 5.979535 | 6.455724 | 5.976536 | 6.523435 | 6.258549 | 6.022649 | 5.646901 | 6.585083 | 6.1545   | 6.832331  | 7.141523 | 7.4121    | 9.760146 | 9.629699 | 9.554529 | 6.798514 | 0.903   | 0.301    | 1.85E-10 | 5.24E-09 | 10.95067 | 5  |
| 7282_at   | YBR101C | FES1   | 8.952147 | 9.014227 | 9.121635 | 8.990586 | 9.005186 | 8.407429 | 8.841285 | 8.839889 | 8.466692 | 8.675925  | 8.625871 | 8.375556  | 10.54777 | 10.41791 | 10.71104 | 8.696119 | 0.347   | 0.316    | 2.01E-06 | 1.42E-06 | 3.766715 | 8  |
| 7283_at   | YBR060C | ORC2   | 5.402298 | 5.545994 | 5.023568 | 5.010402 | 5.054283 | 5.129851 | 5.044982 | 5.022309 | 4.683106 | 4.5688718 | 4.896576 | 4.672487  | 4.712635 | 4.687138 | 4.653918 | 4.77645  | -0.182  | 0.0633   | 0.000157 | 4.43E-05 | 1.620834 | 16 |
| 7284_at   | YBR061C | TRM7   | 6.802073 | 7.036466 | 6.456526 | 6.481878 | 6.649064 | 6.447643 | 6.342532 | 6.455171 | 6.439778 | 6.55241   | 6.472474 | 6.156997  | 7.311341 | 6.656768 | 6.686844 | 6.39591  | 0.0168  | 0.114    | 0.0263   | 0.003654 | 1.342611 | 13 |
| 7285_at   | YBR062C |        | 9.338261 | 9.295012 | 9.607917 | 9.919529 | 9.675242 | 9.342063 | 8.919933 | 9.218411 | 9.094255 | 9.454533  | 9.840488 | 8.744491  | 11.39517 | 10.81749 | 10.84658 | 9.192184 | 0.348   | 0.291    | 5.45E-05 | 1.86E-05 | 3.56884  | 8  |
| 7286_at   | YBR063C |        | 6.182959 | 6.380902 | 6.010856 | 6.774149 | 6.768093 | 6.604387 | 6.169676 | 7.300201 | 7.10225  | 7.05945   |          |           |          |          |          |          |         |          |          |          |          |    |



|           |         |          |          |          |          |          |          |          |          |          |          |          |          |          |          |          |          |           |          |          |          |          |          |    |
|-----------|---------|----------|----------|----------|----------|----------|----------|----------|----------|----------|----------|----------|----------|----------|----------|----------|----------|-----------|----------|----------|----------|----------|----------|----|
| 7319_at   | YBR051W | 4.026213 | 4.206285 | 5.337997 | 4.097602 | 4.286456 | 4.246611 | 4.016543 | 4.026199 | 4.221749 | 4.133958 | 4.322264 | 3.916613 | 4.662615 | 4.07431  | 4.566321 | 4.084755 | -0.0201   | 0.108    | 0.186    | 0.020909 | 1.340864 | 13       |    |
| 7320_at   | YBR052C | RFS1     | 8.938014 | 8.919643 | 9.210476 | 9.501711 | 9.436524 | 9.509096 | 9.243336 | 9.181763 | 9.261569 | 9.000964 | 8.815409 | 8.589033 | 8.83417  | 8.672095 | 8.511672 | 9.132028  | -0.144   | -0.703   | 0.0117   | 0.001781 | 1.520229 | 16 |
| 7321_at   | YBR053C |          | 7.450503 | 7.871501 | 7.801175 | 8.876263 | 8.822817 | 9.149948 | 8.573147 | 8.632444 | 9.043474 | 7.935114 | 8.126058 | 8.424559 | 8.692904 | 7.658229 | 7.613574 | 8.669317  | -0.163   | -0.298   | 0.000771 | 0.00017  | 2.624887 | 15 |
| 7322_at   | YBR054W | YRO2     | 8.866261 | 8.616538 | 7.340384 | 10.04037 | 9.987751 | 8.844355 | 10.20371 | 10.3447  | 11.19753 | 10.89947 | 10.4783  | 10.85592 | 9.693099 | 9.827023 | 10.17467 | 10.171103 | 0.403    | -0.439   | 6.24E-05 | 2.07E-05 | 5.51988  | 10 |
| 7323_at   | YBR055C | PRP6     | 6.178818 | 6.353981 | 5.795289 | 6.144584 | 6.235798 | 6.522888 | 5.639375 | 5.779574 | 6.31093  | 6.240269 | 6.259926 | 6.229105 | 5.984711 | 6.764188 | 6.227063 | 6.154768  | 0.0552   | 0.0202   | 0.586    | 0.058653 | 1.159216 | 13 |
| 7324_at   | YBR056W |          | 6.006157 | 6.083209 | 5.888193 | 6.529566 | 6.467398 | 6.615538 | 5.362485 | 6.071881 | 6.375758 | 6.117485 | 6.837104 | 6.213682 | 5.170517 | 6.826414 | 6.041577 | 6.167244  | -0.0667  | -0.0577  | 0.351    | 0.036987 | 1.281555 | 13 |
| 7325_at   | YBR057C | MUM2     | 6.60059  | 6.64692  | 6.124161 | 6.321816 | 6.293977 | 6.326471 | 5.856824 | 6.59517  | 6.585508 | 6.925179 | 6.743721 | 7.033936 | 5.856558 | 6.372258 | 6.156347 | 6.564605  | -0.0238  | -0.0811  | 0.35     | 0.036841 | 1.255135 | 13 |
| 7326_at   | YBR059C | UBP14    | 5.844806 | 5.990292 | 4.926602 | 5.66336  | 5.548356 | 5.344132 | 5.791405 | 5.795517 | 5.700162 | 5.675766 | 5.84606  | 5.795766 | 5.574142 | 5.640296 | 5.17843  | 5.713632  | -0.0131  | -0.055   | 0.493    | 0.050192 | 1.160436 | 13 |
| 7327_at   | YBR059C | AKL1     | 6.33517  | 6.514588 | 6.223016 | 6.545596 | 6.430883 | 6.718119 | 6.636635 | 6.501979 | 6.862566 | 6.789827 | 7.314304 | 7.323827 | 7.269472 | 7.564208 | 7.364606 | 6.908183  | 0.293    | -0.0103  | 2.99E-05 | 1.14E-05 | 2.172109 | 7  |
| 7328_at   | YBR015C | MNN2     | 6.9647   | 6.991763 | 7.105274 | 7.097936 | 6.968921 | 7.075544 | 7.659824 | 7.234151 | 6.975202 | 7.496383 | 7.14033  | 8.007669 | 6.580052 | 6.944537 | 6.680284 | 7.361264  | -0.0306  | -0.138   | 0.0379   | 0.005066 | 1.448451 | 12 |
| 7329_at   | YBR016W |          | 8.675196 | 8.329888 | 8.656129 | 8.865388 | 8.719172 | 8.303729 | 9.032349 | 9.398968 | 8.319634 | 9.970343 | 9.603491 | 9.784781 | 9.054622 | 9.272151 | 9.251827 | 9.278031  | 0.246    | -0.12    | 0.0195   | 0.002802 | 1.986439 | 9  |
| 7330_at   | YBR017C | KAP104   | 6.711268 | 6.872659 | 7.017585 | 6.644112 | 6.441179 | 6.691213 | 6.129284 | 6.200961 | 6.232117 | 5.587636 | 6.148766 | 6.039099 | 5.523401 | 5.837103 | 5.734635 | 6.083261  | -0.32    | 0.0582   | 9.49E-06 | 4.58E-06 | 2.33681  | 16 |
| 7331_at   | YBR018C | GAL7     | 4.763931 | 4.502019 | 5.501338 | 4.677091 | 4.628155 | 4.469153 | 4.777559 | 4.516592 | 4.696919 | 5.200817 | 5.120659 | 4.746465 | 5.71023  | 4.94748  | 4.712843 | 4.774568  | 0.0895   | 0.0634   | 0.252    | 0.027452 | 1.350611 | 13 |
| 7332_at   | YBR019C | GAL10    | 4.070313 | 4.04846  | 4.278302 | 4.57718  | 4.180433 | 4.652579 | 4.20272  | 4.43392  | 4.355966 | 4.173938 | 4.268004 | 3.994591 | 4.340704 | 4.240494 | 4.154472 | 4.316192  | -0.00348 | -0.0301  | 0.634    | 0.063049 | 1.079408 | 13 |
| 7333_at   | YBR020W | GAL1     | 3.849397 | 4.112981 | 3.25438  | 4.021371 | 3.828201 | 4.534337 | 3.946894 | 4.135742 | 4.503499 | 4.448853 | 4.814172 | 5.310235 | 4.492627 | 4.753499 | 4.928663 | 4.547643  | 0.291    | -0.0895  | 0.00405  | 0.000709 | 2.164541 | 9  |
| 7334_at   | YBR021W | FUR4     | 7.789006 | 7.781683 | 7.151095 | 7.357189 | 7.427966 | 7.698738 | 7.191402 | 7.200946 | 7.438383 | 7.423801 | 7.341519 | 7.372145 | 6.725002 | 6.944538 | 6.918541 | 7.336707  | -0.171   | -0.0327  | 0.000356 | 0.000633 | 1.573285 | 16 |
| 7335_at   | YBR022W | POA1     | 6.546032 | 6.495816 | 6.197642 | 6.988012 | 7.289847 | 6.833794 | 5.880179 | 6.291292 | 6.905407 | 6.471548 | 6.258872 | 6.486464 | 5.842941 | 5.34476  | 5.205556 | 5.686724  | -0.304   | -0.185   | 0.00402  | 0.000101 | 2.620699 | 15 |
| 7336_at   | YBR023C | CHS3     | 7.99143  | 8.101076 | 7.19447  | 7.668129 | 7.661853 | 7.41588  | 6.490648 | 7.256035 | 7.504489 | 9.747557 | 9.753766 | 8.126988 | 7.592734 | 7.960305 | 7.743922 | 7.516474  | 0.0503   | 0.0663   | 0.52     | 0.002658 | 1.270351 | 13 |
| 7337_at   | YBR024W | SCO2     | 8.918601 | 9.156288 | 7.818503 | 9.354487 | 9.667355 | 8.934806 | 8.366682 | 9.373254 | 9.365046 | 10.04196 | 9.671464 | 9.21352  | 8.429868 | 6.984816 | 8.19491  | 9.598601  | -0.0281  | -0.294   | 0.00192  | 0.000372 | 2.096785 | 12 |
| 7338_at   | YBR025C | OLA1     | 10.52197 | 10.75429 | 10.51766 | 10.02646 | 10.00124 | 10.0042  | 9.648348 | 9.33269  | 9.487736 | 8.66342  | 8.713778 | 8.769092 | 7.389445 | 7.801144 | 7.716592 | 9.10283   | -0.794   | 0.00765  | 6.62E-11 | 3.25E-09 | 8.201301 | 18 |
| 7339_at   | YBR026C | ETR1     | 4.756103 | 4.769606 | 4.07268  | 5.589244 | 5.415104 | 5.305992 | 6.145342 | 5.806869 | 5.888465 | 6.159201 | 5.537899 | 6.206447 | 4.398413 | 4.009333 | 4.474051 | 5.905162  | -0.0291  | -0.421   | 5.2E-06  | 2.90E-06 | 2.85141  | 11 |
| 7340_at   | YBR027C |          | 4.047886 | 4.04876  | 3.67592  | 4.019205 | 4.003881 | 4.135886 | 4.373095 | 4.166193 | 4.229507 | 4.08753  | 4.274465 | 4.270126 | 3.944094 | 3.849191 | 3.716198 | 4.215024  | -0.015   | -0.0936  | 0.0034   | 0.000609 | 1.273788 | 13 |
| 7341_at   | YBR028C |          | 3.896319 | 3.982855 | 3.215695 | 3.734451 | 3.773682 | 3.625242 | 3.915877 | 3.592745 | 3.797829 | 3.836613 | 3.641698 | 3.878979 | 3.881422 | 3.45308  | 3.176056 | 3.766994  | -0.0384  | -0.0487  | 0.336    | 0.035542 | 1.991579 | 13 |
| 7342_at   | YBR029C | CDS1     | 7.179786 | 7.462766 | 6.156708 | 7.631167 | 7.526238 | 7.229988 | 7.631167 | 7.526238 | 7.229988 | 7.570534 | 7.555733 | 7.995213 | 8.400069 | 7.720499 | 7.84669  | 7.708026  | 0.26     | -0.0659  | 0.00909  | 0.001429 | 1.991853 | 9  |
| 7343_at   | YBR030W |          | 5.238666 | 5.265175 | 5.028715 | 5.240852 | 4.957716 | 5.037333 | 4.956921 | 5.122088 | 5.094137 | 5.173674 | 5.155521 | 5.048491 | 4.894818 | 5.156769 | 4.809792 | 5.075218  | -0.0465  | -0.00384 | 0.217    | 0.024069 | 1.131302 | 13 |
| 7344_i_at | YBR031W | RPL4A    | 7.346118 | 8.388183 | 9.463322 | 7.845979 | 7.585992 | 8.834114 | 7.405233 | 8.675027 | 7.416134 | 6.237361 | 6.101699 | 8.058319 | 5.800391 | 6.341661 | 6.898581 | 7.107452  | -0.571   | 0.0813   | 0.00936  | 0.001466 | 4.542933 | 18 |
| 7344_s_at | YBR031W | RPL4A    | 11.854   | 11.89184 | 11.93381 | 11.45787 | 11.44835 | 11.87204 | 11.30697 | 11.60026 | 11.49227 | 11.23367 | 11.46761 | 11.4654  | 8.829727 | 10.15094 | 9.793172 | 11.37812  | -0.476   | -0.132   | 2.16E-07 | 2.83E-07 | 3.536499 | 17 |
| 7346_at   | YBR032W |          | 4.623923 | 4.551504 | 3.556434 | 3.818751 | 3.781518 | 3.793233 | 4.0214   | 4.244834 | 3.56152  | 3.79303  | 3.670407 | 3.597717 | 3.813749 | 3.478975 | 3.58539  | 3.726106  | -0.168   | 0.0449   | 0.0445   | 0.005849 | 1.559787 | 16 |
| 7347_at   | YBR033W | EDS1     | 5.986939 | 5.988445 | 5.687758 | 6.60276  | 6.861813 | 6.362394 | 6.897639 | 6.959558 | 6.486291 | 6.78849  | 6.764243 | 6.372485 | 6.043557 | 6.339867 | 6.071674 | 6.754332  | 0.057    | -0.202   | 0.000163 | 4.56E-05 | 1.78776  | 12 |
| 7348_at   | YBR034C | HMT1     | 8.486969 | 8.384876 | 7.958265 | 8.231827 | 8.596013 | 7.724038 | 8.366534 | 8.376522 | 8.05532  | 8.545913 | 7.931161 | 7.18142  | 6.441556 | 6.606529 | 6.129127 | 8.013855  | -0.47    | -0.19    | 3.51E-05 | 1.30E-05 | 6.37419  | 17 |
| 7349_at   | YBR035C | PDX3     | 9.253642 | 8.99597  | 9.32117  | 8.95221  | 8.773891 | 8.823015 | 8.785561 | 8.795686 | 8.734766 | 8.196791 | 8.352868 | 8.72001  | 7.711088 | 8.062686 | 7.961827 | 8.522338  | -0.334   | -0.00333 | 6.45E-07 | 6.15E-07 | 2.421262 | 16 |
| 7350_at   | YBR036C | CSG2     | 9.088153 | 8.831874 | 7.814458 | 9.20491  | 9.223891 | 8.815617 | 9.760221 | 9.64337  | 9.964428 | 8.953989 | 9.913096 | 10.19592 | 9.831823 | 9.773036 | 9.734591 | 9.372     | 0.372    | -0.135   | 0.00033  | 8.25E-05 | 2.682102 | 7  |
| 7351_at   | YBR037C | SCO1     | 7.514337 | 8.029056 | 7.851106 | 8.570251 | 8.556137 | 8.307871 | 8.690313 | 8.504605 | 8.476008 | 8.324009 | 8.442643 | 8.385169 | 8.214793 | 7.974884 | 7.986231 | 8.555501  | 0.04     | -0.168   | 0.00039  | 9.51E-05 | 1.60234  | 12 |
| 7352_at   | YBL009W | ALK2     | 5.835512 | 6.085579 | 5.170663 | 5.187343 | 5.671135 | 5.048121 | 5.520349 | 4.847132 | 4.737149 | 4.918543 | 4.983598 | 4.758553 | 4.937881 | 5.364947 | 4.731223 | 4.748935  | -0.168   | 0.167    | 0.00337  | 0.000604 | 1.962126 | 14 |
| 7353_at   | YBL008W | HIR1     | 4.69245  | 4.981728 | 3.877517 | 4.762788 | 4.61457  | 4.619306 | 5.036428 | 4.768326 | 4.418925 | 4.804009 | 4.663121 | 4.520268 | 4.869987 | 4.85147  | 4.550447 | 4.715982  | 0.0519   | -0.0207  | 0.637    | 0.063277 | 1.147546 | 13 |
| 7354_at   | YBL007C | SLA1     | 7.444443 | 6.670666 | 6.734655 | 6.830216 | 6.566983 | 6.909179 | 6.867339 | 6.609397 | 6.873504 | 6.724294 | 6.737999 | 6.951039 | 6.188918 | 7.325659 | 7.598534 | 6.815789  | 0.235    | 0.109    | 0.000159 | 4.47E-05 | 1.961151 | 8  |
| 7355_at   | YBL006C | LDB7     | 7.456785 | 7.131117 | 7.538962 | 7.451391 | 7.52885  | 7.707197 | 7.457915 | 7.645648 | 7.700464 | 7.929758 | 7.762    | 7.565188 | 6.831934 | 6.456593 | 6.836762 | 7.67875   | -0.147   | -0.177   | 7.89E-05 | 2.51E-05 | 1.93578  | 15 |
| 7356_at   | YBL005W | PDR3     | 6.079602 | 5.974107 | 5.264843 | 5.982601 | 5.964904 | 5.955619 | 6.520072 | 6.619513 | 6.50485  | 6.37655  | 6.936646 | 6.80207  | 5.794653 | 6.213891 | 6.082718 | 6.547167  | 0.106    | -0.184   | 0.00728  | 0.001882 | 1.852304 | 12 |
| 7357_at   | YBL004W | UTP20    | 5.224649 | 5.222912 | 4.504029 | 4.379579 | 4.581152 | 4.721847 | 4.585698 | 4.814513 | 4.201907 | 4.741256 | 4.385438 | 4.536887 | 4.585834 | 5.077625 | 4.616234 | 4.495437  | 0.0548   | 0.161    | 0.00493  | 0.000144 | 1.598281 | 13 |
| 7358_s_at | YBL003C | HTA2     | 10.70051 | 10.76604 | 10.77294 | 10.37546 | 10.51846 | 10.68847 | 10.14912 | 10.12212 | 10.00553 | 9.478246 | 9.560452 | 9.951177 | 9.418394 | 9.9009   | 9.277511 | 9.861683  | -0.439   | 0.0362   | 5.51E-07 | 5.46E-07 | 3.202905 | 16 |
| 7359_at   | YBL002W | HTB2     | 8.805275 | 9.026123 | 8.929635 | 8.761866 | 8.609165 | 8.269946 | 7.887323 | 7.642805 | 8.033105 | 7.680478 | 7.636457 | 7.979    |          |          |          |           |          |          |          |          |          |    |

|           |         |        |          |          |          |          |          |          |          |          |          |          |          |          |          |          |          |          |          |          |          |          |          |    |
|-----------|---------|--------|----------|----------|----------|----------|----------|----------|----------|----------|----------|----------|----------|----------|----------|----------|----------|----------|----------|----------|----------|----------|----------|----|
| 7391_at   | YBL016W | FUS3   | 4.139036 | 4.377911 | 4.026463 | 4.387867 | 4.046712 | 4.410566 | 4.220477 | 4.295159 | 4.629022 | 4.476689 | 4.664769 | 4.594322 | 4.359456 | 4.666848 | 4.402319 | 4.470686 | 0.092    | -0.0408  | 0.0391   | 0.005211 | 1.279938 | 13 |
| 7392_at   | YBL015W | ACH1   | 6.827899 | 6.952042 | 6.602645 | 7.708854 | 7.776178 | 7.990566 | 7.732265 | 7.793385 | 8.193837 | 7.856458 | 7.834954 | 7.796996 | 8.414675 | 8.654683 | 8.120956 | 8.017273 | 0.361    | -0.108   | 0.000103 | 3.14E-05 | 2.60702  | 7  |
| 7393_at   | YBL014W | RRN6   | 5.791305 | 5.773893 | 5.433394 | 5.475036 | 5.2949   | 5.392576 | 4.826045 | 4.760916 | 5.438202 | 5.369338 | 5.264501 | 4.880197 | 6.031567 | 6.080814 | 5.864156 | 5.118699 | 0.0741   | 0.198    | 0.000549 | 0.000128 | 1.790066 | 13 |
| 7394_at   | YBL013W | FMT1   | 4.386314 | 4.387146 | 4.097553 | 4.424274 | 4.256937 | 4.532152 | 3.976715 | 4.139305 | 4.582407 | 4.413369 | 4.294549 | 4.237827 | 4.838777 | 4.430338 | 4.141651 | 4.310568 | -0.0408  | -0.0252  | 0.464    | 0.047528 | 1.137867 | 13 |
| 7395_at   | YBL012C |        | 3.313257 | 3.212722 | 2.692276 | 3.039555 | 2.968094 | 3.183785 | 2.645886 | 3.068188 | 3.28995  | 3.106367 | 3.045067 | 2.81759  | 3.042212 | 3.374762 | 2.894153 | 3.006241 | 0.000594 | 0.0221   | 0.838    | 0.081032 | 1.055601 | 13 |
| 7396_at   | YBL011W | SCT1   | 7.876958 | 8.015408 | 6.87725  | 6.926119 | 6.910178 | 6.882159 | 6.545251 | 7.157027 | 7.208125 | 7.264226 | 7.233786 | 6.998108 | 8.329012 | 9.177483 | 8.17126  | 6.969748 | 0.134    | 0.225    | 0.0016   | 0.000318 | 2.116426 | 8  |
| 7397_at   | YBL010C |        | 4.037284 | 4.235573 | 3.925618 | 4.239364 | 4.173987 | 4.015256 | 3.793505 | 3.95123  | 4.026838 | 3.760964 | 4.165576 | 3.779965 | 3.938317 | 3.978411 | 3.64301  | 3.957468 | -0.0665  | 0.00326  | 0.186    | 0.02089  | 1.192835 | 13 |
| 7398_at   | YBL054W |        | 6.879674 | 6.785734 | 6.913272 | 6.926917 | 7.103985 | 6.74988  | 7.162604 | 7.312685 | 7.00907  | 7.154301 | 7.426092 | 7.230122 | 8.068251 | 8.135331 | 7.974411 | 7.254845 | 0.318    | 0.0543   | 1.28E-07 | 2.02E-07 | 3.22202  | 7  |
| 7399_at   | YBL053W |        | 5.860371 | 5.850525 | 6.248552 | 5.654645 | 5.643876 | 5.590018 | 5.789976 | 5.472355 | 5.60962  | 5.689821 | 5.753527 | 5.269511 | 6.157457 | 5.897273 | 5.645833 | 5.555133 | -0.0199  | 0.105    | 0.0171   | 0.002489 | 1.332615 | 13 |
| 7400_at   | YBL052C | SAS3   | 5.045535 | 5.281001 | 6.193068 | 4.931034 | 4.896209 | 4.81676  | 4.996552 | 5.042656 | 4.730031 | 5.419657 | 5.042461 | 5.089541 | 5.284317 | 5.119892 | 4.963305 | 4.947374 | -0.0552  | 0.0947   | 0.211    | 0.023448 | 1.374101 | 13 |
| 7401_at   | YBL051C | PIN4   | 7.583397 | 8.096157 | 7.607291 | 7.386411 | 7.393273 | 7.209145 | 7.11178  | 7.045406 | 7.054465 | 6.937913 | 7.16958  | 7.605403 | 6.761368 | 7.068483 | 7.475574 | 7.212075 | -0.157   | 0.0581   | 0.0532   | 0.006848 | 1.517105 | 16 |
| 7402_at   | YBL050W | SEC17  | 8.155654 | 8.197092 | 8.910782 | 8.739813 | 8.683431 | 8.701287 | 8.917603 | 8.41367  | 8.680372 | 8.983616 | 8.574306 | 8.746629 | 9.569876 | 9.157166 | 9.448723 | 8.775254 | 0.232    | 0.039    | 0.00146  | 0.000295 | 1.850689 | 8  |
| 7403_at   | YBL049W | MOH1   | 7.908056 | 7.904101 | 8.338537 | 9.185298 | 10.21365 | 10.12365 | 10.5786  | 9.439941 | 10.17137 | 10.45643 | 9.598251 | 9.363523 | 9.113267 | 8.396702 | 9.786513 | 10.08447 | 0.227    | -0.409   | 0.00137  | 0.000279 | 3.877771 | 10 |
| 7404_at   | YBL048W |        | 7.396953 | 7.688211 | 7.985344 | 8.853009 | 8.819494 | 9.056281 | 9.334783 | 8.897439 | 9.554946 | 9.679845 | 9.51961  | 9.747427 | 9.088347 | 9.380484 | 9.788639 | 9.595912 | 0.446    | -0.275   | 6.08E-07 | 5.91E-07 | 3.984959 | 10 |
| 7405_at   | YBL047C | EDE1   | 8.382851 | 8.297191 | 7.767146 | 8.273528 | 8.115809 | 8.493018 | 7.9984   | 9.200002 | 8.601073 | 7.998124 | 8.40602  | 8.368011 | 7.951073 | 8.664005 | 8.503358 | 8.254161 | 0.0512   | 0.00366  | 0.67     | 0.066257 | 1.145491 | 13 |
| 7406_at   | YBL046W | PSY4   | 7.677113 | 7.450914 | 7.115217 | 7.261946 | 7.377912 | 7.20742  | 7.120637 | 7.371551 | 7.338153 | 7.696771 | 7.607644 | 7.291067 | 8.071987 | 8.202103 | 7.66086  | 7.386404 | 0.158    | 0.0837   | 0.00135  | 0.000276 | 1.606489 | 13 |
| 7407_at   | YBL045C | COR1   | 7.491315 | 7.242681 | 6.239031 | 8.88395  | 9.009542 | 8.358104 | 8.163746 | 9.033175 | 9.641988 | 9.919137 | 9.481867 | 7.709934 | 8.233285 | 8.198387 | 9.292544 | 0.262    | -0.483   | 8.95E-05 | 2.78E-05 | 4.906636 | 10       |    |
| 7408_at   | YBL044W |        | 3.636052 | 3.46196  | 3.033456 | 3.407748 | 3.406495 | 3.443529 | 3.219932 | 3.547037 | 3.482102 | 3.807264 | 3.622403 | 3.3817   | 3.397777 | 3.699376 | 3.3717   | 3.506175 | 0.0432   | -0.0213  | 0.478    | 0.048833 | 1.128593 | 10 |
| 7409_at   | YBL043W | ECM13  | 10.05048 | 9.240008 | 8.627392 | 10.92145 | 11.00378 | 9.822428 | 10.75902 | 11.18132 | 11.12767 | 11.51679 | 11.33508 | 11.06937 | 11.04463 | 11.0073  | 11.34993 | 10.457   | -0.323   | 5.88E-05 | 1.98E-05 | 4.558304 | 10       |    |
| 7410_at   | YBL042C | FUI1   | 6.812977 | 6.815066 | 6.823567 | 6.580617 | 6.77929  | 6.388593 | 6.956451 | 6.754328 | 7.135935 | 6.611514 | 6.440749 | 6.514601 | 4.760526 | 5.013312 | 5.397751 | 6.67931  | -0.357   | -0.253   | 2.13E-05 | 8.63E-06 | 3.316768 | 17 |
| 7411_at   | YBL041W | PRE7   | 9.254115 | 9.377108 | 9.496697 | 9.525015 | 9.543946 | 9.365602 | 9.55108  | 9.603795 | 9.46848  | 9.340909 | 9.37059  | 9.511635 | 8.998386 | 9.140753 | 8.990296 | 9.476906 | -0.0964  | -0.078   | 3.02E-05 | 1.14E-05 | 1.413375 | 12 |
| 7412_at   | YBL040C | ERD2   | 7.145476 | 7.248804 | 7.672913 | 7.019366 | 7.03846  | 7.077293 | 6.88721  | 6.50428  | 6.714586 | 6.258634 | 6.138225 | 6.412307 | 5.915305 | 6.188877 | 6.050825 | 6.504007 | -0.363   | 0.0585   | 2.15E-06 | 1.49E-06 | 2.620418 | 16 |
| 7413_at   | YBL039C | UR47   | 9.149226 | 9.091418 | 8.909198 | 8.060095 | 8.340306 | 8.240182 | 7.760211 | 7.836201 | 7.49173  | 7.03372  | 6.823387 | 6.303617 | 6.052379 | 6.587634 | 6.132855 | 7.190763 | -0.767   | 0.132    | 2.46E-08 | 6.62E-08 | 7.642637 | 12 |
| 7414_at   | YBL038W | MRPL16 | 5.930187 | 6.046066 | 5.787973 | 6.328388 | 6.407517 | 6.210393 | 6.691021 | 6.475618 | 6.236391 | 6.55396  | 6.575367 | 6.015735 | 5.943921 | 5.874034 | 5.725746 | 6.360927 | -0.0405  | -0.129   | 0.00569  | 0.000954 | 1.441065 | 18 |
| 7415_at   | YBL037W | APL3   | 3.765074 | 3.897056 | 3.248116 | 3.702405 | 3.597486 | 3.647403 | 3.905129 | 3.930152 | 3.684912 | 3.861806 | 3.783726 | 3.631972 | 5.503884 | 4.974203 | 4.382489 | 3.793538 | 0.309    | 0.143    | 0.000297 | 7.54E-05 | 2.424301 | 8  |
| 7416_at   | YBL036C |        | 8.692175 | 8.609462 | 8.404047 | 8.636171 | 8.687854 | 8.606309 | 8.662028 | 8.803352 | 8.587754 | 8.900112 | 8.820281 | 8.710436 | 9.226822 | 9.194491 | 8.813061 | 8.752822 | 0.133    | 0.0192   | 0.000594 | 0.00136  | 1.424212 | 13 |
| 7417_at   | YBL035C | POL12  | 6.215667 | 6.472975 | 6.689389 | 6.420305 | 6.391301 | 6.670791 | 6.312254 | 6.560471 | 6.150748 | 6.462655 | 6.46428  | 6.231676 | 6.824455 | 6.770704 | 6.493522 | 6.396488 | 0.0504   | 0.0521   | 0.1      | 0.012056 | 1.229712 | 13 |
| 7418_at   | YBL034C | STU1   | 6.376711 | 6.497065 | 5.931123 | 6.394799 | 6.382881 | 6.375585 | 6.261231 | 6.389627 | 6.172349 | 6.817003 | 6.458866 | 6.162389 | 6.147709 | 6.839109 | 6.056879 | 6.446723 | 0.548    | 0.267    | 1.8E-06  | 1.31E-06 | 9.26317  | 5  |
| 7419_at   | YBL033C | RIB1   | 8.33538  | 8.332788 | 8.554286 | 9.178018 | 9.242623 | 8.987827 | 9.360788 | 9.536585 | 9.236826 | 10.06864 | 9.691686 | 9.336485 | 9.685226 | 9.776868 | 9.476399 | 9.592702 | 0.3629   | -0.156   | 2.5E-06  | 1.67E-06 | 2.476113 | 9  |
| 7420_at   | YBL032W | HEK2   | 7.507165 | 7.195658 | 6.468168 | 6.642174 | 6.747719 | 6.63984  | 6.777647 | 6.888476 | 6.557922 | 7.250195 | 9.697174 | 7.139083 | 6.521823 | 7.09684  | 7.059298 | 6.848578 | 0.00489  | 0.0287   | 0.861    | 0.02898  | 1.07429  | 13 |
| 7421_at   | YBL076C | ILS1   | 8.581323 | 8.573162 | 8.641312 | 8.01406  | 8.080276 | 8.436264 | 7.475385 | 7.392145 | 7.666019 | 7.143474 | 7.358377 | 7.837127 | 7.195036 | 7.401802 | 7.493587 | 7.520974 | -0.331   | 0.13     | 7.77E-05 | 2.48E-05 | 2.055652 | 14 |
| 7422_at   | YBL075C | SSA3   | 7.181241 | 6.878561 | 6.974441 | 7.062704 | 7.462020 | 6.986124 | 7.435171 | 7.260234 | 7.168941 | 7.266707 | 7.406673 | 7.566036 | 7.676711 | 7.628754 | 7.628688 | 7.319644 | 0.191    | -0.00263 | 0.000927 | 0.0002   | 1.657692 | 13 |
| 7423_at   | YBL074C | AAR2   | 4.953095 | 4.4001   | 3.576717 | 4.091876 | 3.945866 | 4.17161  | 4.346474 | 4.710851 | 4.749639 | 4.309765 | 4.350644 | 3.904375 | 4.853954 | 4.402777 | 4.09195  | 4.282688 | 0.0346   | 0.0224   | 0.86     | 0.082994 | 1.118052 | 13 |
| 7424_at   | YBL073W |        | 4.422657 | 4.333438 | 3.720908 | 4.133792 | 4.083206 | 4.331784 | 3.968359 | 4.138114 | 4.205429 | 4.008994 | 4.142598 | 3.617265 | 4.089955 | 4.118267 | 3.841648 | 4.036896 | -0.0544  | 0.0167   | 0.478    | 0.04886  | 1.155077 | 13 |
| 7425_s_at | YBL072C | RPS8A  | 12.07306 | 12.2549  | 12.35105 | 11.89745 | 11.94105 | 12.18105 | 11.56434 | 11.80464 | 11.80607 | 10.93716 | 11.16551 | 11.34979 | 10.24438 | 10.35049 | 10.45645 | 11.45308 | -0.51    | -0.0419  | 7.22E-09 | 3.11E-08 | 3.860834 | 18 |
| 7426_at   | YBL071C |        | 5.98873  | 6.074823 | 5.469279 | 5.756465 | 6.04472  | 6.175071 | 6.013828 | 5.966435 | 5.847724 | 5.941964 | 6.43132  | 6.000223 | 6.099684 | 6.617501 | 6.202833 | 6.059906 | 0.121    | 0.00492  | 0.0605   | 0.007697 | 1.377357 | 13 |
| 7427_at   | YBL070C |        | 3.475643 | 3.760319 | 3.301265 | 3.409214 | 3.151637 | 3.554512 | 3.458404 | 3.562991 | 3.471489 | 3.728428 | 3.213235 | 3.153729 | 3.282876 | 3.400749 | 3.429499 | 3.396325 | -0.0358  | 0.0112   | 0.634    | 0.063033 | 1.09968  | 13 |
| 7428_at   | YBL068W | PRS4   | 7.9112   | 7.947675 | 7.659796 | 7.257433 | 7.507094 | 7.216703 | 7.090475 | 7.247373 | 6.722005 | 6.752754 | 6.755422 | 6.452822 | 6.189032 | 6.273021 | 5.72163  | 6.810855 | -0.466   | 0.0382   | 3.88E-07 | 4.29E-07 | 3.44013  | 16 |
| 7429_at   | YBL067C | UBP13  | 5.691956 | 5.612492 | 4.087429 | 5.49212  | 5.588212 | 5.005988 | 6.043301 | 5.763263 | 5.675999 | 6.048485 | 5.769626 | 5.812383 | 6.030406 | 6.934641 | 6.855267 | 5.839137 | 0.0348   | 0.0995   | 0.000547 | 0.000127 | 4.138412 | 10 |
| 7430_at   | YBL066C | SEF1   | 4.008344 | 3.861293 | 3.526089 | 4.090927 | 3.996743 | 3.998981 | 4.299621 | 4.355261 | 4.251891 | 4.498849 | 4.684725 | 4.266993 | 4.880794 | 4.947756 | 4.636728 | 4.348537 | 0.271    | -0.0221  | 1.07E-05 | 5.02E-06 | 2.05296  | 7  |
| 7431_at   | YBL065W |        | 6.436855 | 6.595669 | 6.585782 | 6.403359 | 6.427831 | 6.948886 | 7.990062 | 8.074354 | 7.179188 | 9.330464 | 9.087222 | 9.022163 |          |          |          |          |          |          |          |          |          |    |

|           |         |        |          |          |          |          |           |          |          |          |          |          |          |          |          |          |          |          |          |          |          |          |          |    |
|-----------|---------|--------|----------|----------|----------|----------|-----------|----------|----------|----------|----------|----------|----------|----------|----------|----------|----------|----------|----------|----------|----------|----------|----------|----|
| 7463_at   | YBL079W | MUP170 | 5.34939  | 5.787244 | 5.135827 | 5.370781 | 4.873782  | 5.488422 | 4.439475 | 4.742111 | 5.270805 | 4.772872 | 5.173957 | 5.537572 | 5.479321 | 5.665241 | 5.453337 | 5.025019 | 0.0345   | 0.126    | 0.0945   | 0.011446 | 1.417802 | 13 |
| 7464_at   | YBL078C | ATG8   | 8.889977 | 9.237175 | 8.943667 | 10.33242 | 10.08053  | 9.98347  | 9.474931 | 10.70028 | 10.73236 | 11.39479 | 11.23182 | 11.29541 | 11.58148 | 11.76769 | 11.40432 | 10.90576 | 0.691    | -0.166   | 1.03E-06 | 8.69E-07 | 6.250759 | 4  |
| 7465_at   | YBL077W |        | 5.948725 | 6.70084  | 5.283413 | 5.368158 | 5.678223  | 6.145489 | 5.041942 | 5.328045 | 5.284685 | 5.428483 | 5.703974 | 5.126174 | 5.67928  | 5.948086 | 5.866867 | 5.36343  | -0.0427  | 0.152    | 0.0973   | 0.011762 | 1.545737 | 13 |
| 7478_s_at | YBL109W |        | 5.383558 | 5.312056 | 5.229414 | 5.340031 | 5.062725  | 5.699355 | 5.488911 | 5.45257  | 5.336668 | 5.033315 | 5.402855 | 5.492414 | 6.015621 | 6.174169 | 5.687155 | 5.36605  | 0.221    | 0.0997   | 0.0254   | 0.003537 | 1.87227  | 8  |
| 7479_at   | YBL107C |        | 7.000854 | 7.257197 | 7.376006 | 7.503151 | 7.45211   | 7.547366 | 7.884894 | 7.435723 | 7.592007 | 7.483214 | 7.296744 | 7.378662 | 6.674723 | 6.7298   | 6.68348  | 7.580879 | -0.131   | -0.173   | 1.09E-05 | 5.08E-06 | 1.863733 | 15 |
| 7480_at   | YBL106C | SRO77  | 6.984498 | 7.137743 | 6.590443 | 7.145323 | 7.25278   | 7.321744 | 7.206874 | 7.283832 | 7.125347 | 7.268376 | 7.484201 | 7.353824 | 6.645838 | 7.416488 | 7.48602  | 7.340409 | 0.181    | -0.0173  | 0.000576 | 0.00133  | 1.615418 | 13 |
| 7481_at   | YBL105C | PKC1   | 5.769017 | 5.863399 | 5.205665 | 5.835792 | 5.592641  | 5.861486 | 6.051359 | 6.043966 | 6.249259 | 6.376808 | 6.396207 | 6.917398 | 7.115212 | 6.728533 | 7.147207 | 6.300341 | 0.387    | -0.00318 | 2.42E-05 | 9.54E-06 | 2.789052 | 7  |
| 7482_at   | YBL104C |        | 6.465523 | 6.381076 | 6.189476 | 6.071422 | 6.030132  | 6.329865 | 6.032169 | 6.181837 | 6.14663  | 6.035296 | 5.972543 | 6.021354 | 6.401589 | 6.243751 | 5.746375 | 6.04562  | -0.0591  | 0.0528   | 0.0851   | 0.010428 | 1.294423 | 13 |
| 7483_at   | YBL103W | RTG3   | 6.722159 | 6.464815 | 6.077729 | 6.373381 | 6.431607  | 6.420418 | 6.541383 | 6.700173 | 6.611703 | 6.883698 | 6.688775 | 6.644742 | 6.378969 | 6.521366 | 6.322197 | 6.633931 | 0.0201   | -0.0639  | 0.137    | 0.015972 | 1.205436 | 13 |
| 7484_at   | YBL102W | SFT2   | 9.214737 | 9.502171 | 9.016012 | 9.099447 | 9.07828   | 9.218487 | 9.981394 | 9.170201 | 9.334566 | 8.885166 | 9.161908 | 9.169029 | 8.509273 | 8.517789 | 8.825263 | 9.061986 | -0.197   | -0.0114  | 0.000265 | 6.88E-05 | 1.686042 | 16 |
| 7485_at   | YBL101C | ECM21  | 6.080209 | 6.161635 | 5.776859 | 6.380232 | 6.134388  | 6.510382 | 6.228143 | 6.328835 | 6.470809 | 6.448716 | 6.964881 | 7.471643 | 7.90588  | 8.176619 | 8.318782 | 6.702457 | 0.555    | 0.102    | 4.66E-07 | 4.88E-07 | 4.354577 | 7  |
| 7486_at   | YBL100C |        | 4.669991 | 4.852226 | 4.244024 | 4.730761 | 4.583972  | 4.622524 | 4.791531 | 5.072301 | 5.427563 | 4.722112 | 4.997    | 4.461928 | 4.258304 | 4.405784 | 4.668477 | 4.857671 | -0.042   | -0.096   | 0.111    | 0.013188 | 1.340455 | 12 |
| 7487_at   | YBL099W | ATP1   | 9.187159 | 9.579081 | 8.934506 | 10.52336 | 10.33703  | 10.25882 | 10.89886 | 10.58879 | 10.39465 | 10.46492 | 10.40985 | 11.01103 | 9.658676 | 9.716193 | 10.16878 | 10.73757 | 0.143    | -0.326   | 1.89E-05 | 7.78E-06 | 2.765723 | 12 |
| 7488_at   | YBL098W | BN4A   | 8.685478 | 8.040279 | 7.473985 | 8.899395 | 8.935664  | 8.346612 | 8.53143  | 8.19519  | 8.436828 | 8.304332 | 7.929459 | 8.214556 | 6.500472 | 6.296206 | 6.152635 | 8.387688 | -0.467   | -0.324   | 2.22E-06 | 1.53E-06 | 4.718871 | 17 |
| 7538_at   | YPR186C | PZF1   | 4.526632 | 4.546902 | 5.943035 | 4.344321 | 4.530857  | 4.164548 | 4.691502 | 4.320961 | 4.123076 | 4.500013 | 4.262633 | 4.207702 | 4.143219 | 4.007734 | 3.861686 | 4.246987 | -0.23    | 0.066    | 0.0321   | 0.004374 | 1.8402   | 16 |
| 7539_at   | YPR187W | RPO26  | 8.960979 | 9.102663 | 9.557736 | 8.346517 | 8.528563  | 8.344549 | 7.988493 | 7.803959 | 7.415647 | 7.288715 | 6.936861 | 7.304808 | 6.16444  | 6.908817 | 6.248672 | 7.445599 | -0.727   | 0.109    | 2.11E-08 | 6.07E-08 | 6.87767  | 18 |
| 7540_at   | YPR188C | MUC2   | 5.807142 | 6.104679 | 7.252397 | 6.316909 | 6.388127  | 6.244337 | 6.441583 | 6.938162 | 5.73232  | 5.975044 | 5.616649 | 6.383682 | 5.049111 | 5.406389 | 4.72147  | 5.916905 | -0.388   | -0.069   | 0.000517 | 0.001222 | 2.79949  | 16 |
| 7541_at   | YPR189W | SK13   | 4.293963 | 4.233344 | 5.272786 | 4.27189  | 4.296736  | 4.057088 | 4.488293 | 4.159065 | 3.87889  | 4.078326 | 4.144748 | 4.402382 | 3.720975 | 4.18066  | 3.703774 | 4.079689 | -0.178   | 0.0406   | 0.0333   | 0.004516 | 1.604084 | 16 |
| 7542_at   | YPR190C | RPC82  | 7.028717 | 7.119938 | 7.459826 | 6.750409 | 6.701431  | 6.129387 | 6.604207 | 6.296577 | 6.191872 | 6.356815 | 6.444748 | 6.347487 | 5.811959 | 5.980865 | 5.548768 | 6.289652 | -0.335   | 0.0514   | 0.000123 | 3.61E-05 | 2.427322 | 16 |
| 7543_at   | YPR191W | OCR2   | 7.721804 | 7.461531 | 7.036549 | 5.983324 | 9.240122  | 8.431118 | 9.812609 | 9.602631 | 8.908654 | 9.598192 | 9.631636 | 9.924688 | 8.410215 | 8.286656 | 8.32011  | 8.849338 | 0.231    | -0.54    | 9.53E-07 | 8.21E-07 | 5.354391 | 11 |
| 7544_at   | YPR192W | AQY1   | 5.279352 | 4.45118  | 5.954479 | 5.233908 | 5.275842  | 5.268365 | 5.286725 | 5.258725 | 5.135394 | 5.280656 | 5.372862 | 5.293633 | 5.291617 | 5.244095 | 5.358688 | 5.298084 | 0.0214   | -0.00537 | 0.942    | 0.090129 | 1.058405 | 13 |
| 7545_at   | YPR193C | HPA2   | 4.635044 | 4.768741 | 5.460887 | 7.659006 | 6.819441  | 5.869824 | 7.91055  | 7.846988 | 8.038161 | 9.442989 | 9.233142 | 9.668772 | 7.609856 | 7.407969 | 6.880553 | 6.884472 | 0.731    | -0.717   | 8.75E-06 | 4.27E-06 | 18.34654 | 4  |
| 7546_at   | YPR194C | OPT2   | 6.729    | 6.594328 | 5.514803 | 7.081319 | 6.658069  | 6.847738 | 6.924208 | 6.066382 | 7.38226  | 4.837829 | 5.11824  | 5.342216 | 6.654171 | 5.238871 | 5.171367 | 6.073142 | -0.459   | -0.102   | 0.0122   | 0.001854 | 3.374906 | 17 |
| 7547_at   | YPR195C |        | 3.848235 | 3.511757 | 3.233782 | 3.396822 | 3.336235  | 3.628254 | 3.378573 | 3.466378 | 3.713049 | 3.806793 | 3.587751 | 3.645676 | 3.54405  | 3.553004 | 3.453946 | 3.554829 | 0.0197   | -0.0119  | 0.845    | 0.081602 | 1.062443 | 13 |
| 7548_at   | YPR196W |        | 4.822168 | 4.59431  | 3.219747 | 4.633481 | 4.03225   | 4.942223 | 4.896403 | 5.11529  | 5.568461 | 5.278504 | 5.832138 | 5.405415 | 5.431015 | 4.905601 | 5.199397 | 5.278254 | 0.291    | -0.167   | 0.0168   | 0.00245  | 2.93291  | 9  |
| 7549_g_at | YPR196W |        | 9.797101 | 9.705208 | 9.322642 | 9.75961  | 9.628442  | 9.568838 | 9.078682 | 9.670337 | 9.864057 | 9.70751  | 10.04362 | 9.950314 | 10.75398 | 10.08737 | 10.45919 | 9.741339 | 0.221    | 0.077    | 0.0016   | 0.000319 | 1.967175 | 8  |
| 7550_at   | YPR197C |        | 3.72389  | 3.605927 | 3.097405 | 3.674026 | 3.2806    | 3.591776 | 3.271053 | 3.289445 | 3.551857 | 3.307167 | 3.550504 | 3.054797 | 3.635347 | 3.592321 | 3.395735 | 3.30132  | 0.00623  | 0.0601   | 0.449    | 0.046332 | 1.163968 | 13 |
| 7551_at   | YPR198W | SGE1   | 8.379561 | 8.367152 | 8.185024 | 8.262368 | 8.182879  | 7.780347 | 7.491518 | 7.778303 | 8.158161 | 7.999332 | 8.482026 | 7.746611 | 7.958177 | 7.689365 | 7.878382 | -0.121   | 0.0482   | 0.0343   | 0.00464  | 1.377707 | 16       |    |
| 7552_at   | YPR199C | ARR1   | 8.042249 | 8.088102 | 7.368711 | 7.79614  | 7.945186  | 7.390698 | 8.110144 | 7.846426 | 7.939468 | 8.253044 | 7.93351  | 8.136228 | 7.562512 | 7.399205 | 6.904677 | 7.959181 | -0.0993  | -0.115   | 0.0408   | 0.005411 | 5.147632 | 12 |
| 7553_at   | YPR200C | ARR2   | 4.453658 | 4.155832 | 3.525523 | 4.456982 | 4.342363  | 4.501395 | 4.156127 | 4.46423  | 4.362953 | 4.224861 | 4.434049 | 4.425391 | 4.489678 | 4.491166 | 4.072014 | 4.415133 | 0.0599   | -0.0584  | 0.203    | 0.02528  | 1.268086 | 13 |
| 7554_at   | YPR201W | ARR3   | 3.185139 | 3.310569 | 2.66646  | 2.775506 | 2.925316  | 3.004274 | 3.354951 | 3.282403 | 3.163038 | 3.454278 | 3.129354 | 2.905676 | 3.047593 | 2.889495 | 2.856077 | 3.144483 | -0.00349 | -0.0532  | 0.354    | 0.037245 | 1.141458 | 13 |
| 7555_s_at | YPL075W | GCR1   | 6.845182 | 7.189959 | 6.913966 | 6.627497 | 6.725487  | 7.187544 | 6.777256 | 6.590177 | 6.91756  | 6.282944 | 6.066971 | 6.421183 | 7.286921 | 6.5821   | 6.671713 | 6.531663 | -0.0723  | 0.115    | 0.0677   | 0.008515 | 1.482405 | 13 |
| 7561_at   | YPR163C | TIF3   | 8.832388 | 9.144282 | 9.106343 | 8.099759 | 7.530617  | 8.285577 | 7.83891  | 7.5909   | 7.922964 | 7.755648 | 7.489472 | 7.26727  | 7.116087 | 7.089722 | 6.70727  | 7.520231 | -0.507   | 0.127    | 1.65E-06 | 1.23E-06 | 3.836364 | 18 |
| 7562_at   | YPR164W | MMS1   | 4.574828 | 4.540691 | 3.704448 | 4.337262 | 4.300285  | 4.5043   | 4.08943  | 4.099588 | 4.446993 | 4.354563 | 4.432793 | 4.23025  | 4.251881 | 4.339135 | 4.23192  | 4.311473 | 9.78E-05 | -0.00898 | 0.973    | 0.092815 | 1.02212  | 13 |
| 7563_at   | YPR165W | RHO1   | 10.44742 | 10.30481 | 10.18607 | 10.28421 | 10.417791 | 10.36363 | 9.018511 | 10.18897 | 10.49766 | 10.23404 | 10.30740 | 10.35535 | 10.58712 | 10.50705 | 10.58526 | 10.1644  | 0.0742   | 0.0794   | 0.25     | 0.027291 | 1.364416 | 13 |
| 7564_at   | YPR166C | MRP2   | 8.159168 | 8.399377 | 8.402905 | 9.309031 | 9.243899  | 9.417831 | 9.171298 | 8.676928 | 8.930211 | 8.634932 | 8.60485  | 9.245586 | 9.242371 | 8.988083 | 8.702315 | 8.901687 | 0.126    | -0.0567  | 0.41     | 0.042589 | 1.405337 | 13 |
| 7565_at   | YPR167C | MET16  | 9.279521 | 8.945045 | 9.362443 | 8.574384 | 8.673344  | 8.55701  | 7.994881 | 7.734338 | 8.303338 | 8.331402 | 8.275669 | 8.215269 | 8.082676 | 8.226049 | 8.365259 | 8.095208 | -0.223   | 0.168    | 0.000537 | 0.00125  | 2.147721 | 14 |
| 7566_at   | YPR168W | NUT2   | 3.82948  | 3.867106 | 3.219947 | 3.622194 | 3.408664  | 3.543294 | 4.107567 | 3.877504 | 3.905087 | 4.252446 | 4.176866 | 3.627589 | 3.667578 | 3.506954 | 3.356023 | 3.89634  | 0.00208  | -0.0947  | 0.168    | 0.019093 | 1.261432 | 13 |
| 7567_at   | YPR169W | JIP5   | 7.06135  | 7.907001 | 7.688479 | 7.623521 | 7.683003  | 7.493771 | 7.608776 | 7.591857 | 7.019468 | 7.689757 | 7.918957 | 7.633503 | 7.533344 | 7.007716 | 7.373219 | 7.568955 | 0.0623   | 0.0586   | 0.171    | 0.01937  | 1.274395 | 13 |
| 7568_at   | YPR170C |        | 3.704706 | 3.740725 | 3.179102 | 3.238955 | 3.170085  | 3.449711 | 3.507353 | 3.354089 | 3.417064 | 3.350769 | 3.427419 | 3.135836 | 3.450587 | 3.65286  | 3.309798 | 3.314468 | -0.0154  | 0.0509   | 0.266    | 0.028892 | 1.159235 | 13 |
| 7569_at   | YPR171W | BSP1   | 4.176893 | 4.278879 | 3.775376 | 4.010436 | 3.961557  | 4.207265 | 4.034789 | 4.231223 | 3.977672 | 4.146375 | 4.059732 | 4.45346  | 3.399964 |          |          |          |          |          |          |          |          |    |

|           |                |          |          |          |          |          |           |          |          |           |          |          |          |          |          |          |          |          |          |          |          |          |    |
|-----------|----------------|----------|----------|----------|----------|----------|-----------|----------|----------|-----------|----------|----------|----------|----------|----------|----------|----------|----------|----------|----------|----------|----------|----|
| 7601_at   | YPR157W        | 4.755884 | 4.540019 | 5.774071 | 4.695494 | 4.734901 | 4.831899  | 4.996984 | 4.730883 | 4.646668  | 5.090095 | 4.912125 | 4.577485 | 7.619551 | 6.544307 | 6.214894 | 4.816427 | 0.432    | 0.302    | 8.17E-05 | 2.58E-05 | 4.225477 | 8  |
| 7602_at   | YPR158W        | 4.981279 | 4.827121 | 5.940274 | 6.140479 | 5.272606 | 5.640005  | 6.483188 | 5.992067 | 6.469669  | 6.596121 | 6.608834 | 6.864414 | 7.371689 | 6.645863 | 7.607955 | 6.520643 | 0.515    | -0.0818  | 5.99E-05 | 2.00E-05 | 3.912615 | 7  |
| 7603_at   | YPR159W KRE6   | 8.045789 | 7.561209 | 7.450631 | 8.360815 | 8.403161 | 8.263974  | 9.077417 | 8.807004 | 9.093466  | 9.327925 | 9.565378 | 9.891168 | 9.579173 | 8.896359 | 9.720146 | 9.264524 | 0.488    | -0.205   | 1.14E-05 | 5.25E-06 | 3.647545 | 7  |
| 7604_at   | YPR160W GPH1   | 7.580764 | 8.167266 | 8.248997 | 8.950873 | 8.693027 | 10.199686 | 10.1431  | 9.724643 | 10.330404 | 8.464307 | 8.768178 | 9.959368 | 8.642264 | 9.043878 | 9.312806 | 7.99932  | 0.0975   | -0.336   | 0.0463   | 0.006059 | 2.638766 | 12 |
| 7605_at   | YPR161C SGV1   | 7.441271 | 7.349248 | 7.395377 | 7.216232 | 6.996875 | 7.289345  | 6.901237 | 7.144862 | 7.244952  | 7.38489  | 7.278118 | 6.867278 | 6.465623 | 7.015019 | 6.851088 | 7.1046   | -0.14    | -0.00718 | 0.017    | 0.002481 | 1.44903  | 16 |
| 7606_at   | YPR162C ORC4   | 6.106236 | 6.359089 | 6.291983 | 5.99894  | 5.52431  | 6.123061  | 5.258064 | 5.387148 | 5.848396  | 5.166777 | 5.82421  | 6.303253 | 6.050317 | 5.701259 | 5.063417 | 5.413707 | -0.265   | 0.0989   | 0.000775 | 0.00171  | 2.019401 | 16 |
| 7607_at   | YPR121W TH12   | 7.023191 | 6.540158 | 6.614593 | 7.383666 | 7.277031 | 6.954244  | 7.732264 | 7.646758 | 7.205815  | 8.354152 | 8.003629 | 7.891977 | 8.053005 | 7.661325 | 7.353909 | 7.798948 | 0.29     | -0.167   | 0.000313 | 7.89E-05 | 2.387526 | 9  |
| 7608_at   | YPR122W AXL1   | 5.795956 | 5.569697 | 6.058031 | 5.852348 | 5.802527 | 5.348249  | 6.085629 | 5.847893 | 5.530232  | 6.144099 | 5.86837  | 6.087955 | 5.544968 | 5.696461 | 5.331232 | 5.866866 | -0.0368  | -0.0602  | 0.284    | 0.030586 | 1.223756 | 13 |
| 7609_at   | YPR123C        | 4.665148 | 5.781121 | 6.037622 | 5.829201 | 5.734059 | 5.588516  | 5.958786 | 5.927951 | 5.767265  | 5.963241 | 5.779227 | 5.423633 | 5.248383 | 5.693927 | 5.198165 | 5.720041 | -0.194   | -0.014   | 0.00273  | 0.000503 | 1.672001 | 16 |
| 7610_at   | YPR124W CTR1   | 6.172945 | 6.111927 | 7.342361 | 6.983751 | 7.056142 | 6.712314  | 7.914326 | 7.33863  | 7.049836  | 7.423084 | 6.854484 | 6.891028 | 6.388071 | 6.508822 | 6.084408 | 7.218098 | -0.0607  | -0.217   | 0.0177   | 0.002575 | 1.827317 | 12 |
| 7611_at   | YPR125W YLH47  | 8.663279 | 8.497364 | 8.565847 | 8.457255 | 8.581989 | 8.33287   | 8.884519 | 8.600982 | 8.443533  | 8.712498 | 8.589587 | 8.56947  | 8.102393 | 7.945514 | 7.855156 | 8.575849 | -0.133   | -0.0874  | 0.000605 | 0.00138  | 1.539793 | 15 |
| 7612_at   | YPR126C        | 6.515491 | 6.58934  | 6.991186 | 6.162122 | 6.550808 | 6.375951  | 6.580829 | 6.083992 | 6.153578  | 6.422614 | 6.453776 | 6.104114 | 6.348396 | 6.238125 | 6.281485 | 6.262899 | -0.0922  | 0.0618   | 0.0449   | 0.005902 | 1.3469   | 13 |
| 7613_at   | YPR127W        | 7.052878 | 7.210283 | 7.772066 | 9.386967 | 8.958002 | 9.409824  | 10.33309 | 9.761594 | 10.41225  | 9.427926 | 9.406311 | 10.01736 | 8.666722 | 8.42529  | 8.986493 | 10.2653  | 0.294    | -0.547   | 2.12E-05 | 0.89E-06 | 6.017636 | 10 |
| 7614_at   | YPR128C ANT1   | 7.624837 | 7.080161 | 7.789503 | 8.442977 | 8.175582 | 7.950493  | 7.747153 | 7.484597 | 7.880799  | 7.135395 | 7.306705 | 7.178553 | 5.537739 | 5.712229 | 5.670112 | 7.615665 | -0.525   | -0.279   | 3.39E-07 | 3.89E-07 | 4.820781 | 17 |
| 7615_at   | YPR129W SCD6   | 7.353511 | 7.394945 | 7.76717  | 7.385472 | 7.130112 | 7.241827  | 7.148025 | 7.064098 | 7.029128  | 6.792716 | 6.767673 | 6.860365 | 6.408002 | 6.811415 | 6.336255 | 6.937242 | -0.265   | 0.0217   | 8.68E-06 | 4.26E-06 | 2.017148 | 16 |
| 7616_at   | YPR130C        | 6.384761 | 6.533675 | 5.724674 | 5.729546 | 6.065255 | 6.223227  | 6.192933 | 5.722654 | 5.959137  | 5.985636 | 6.161621 | 5.447683 | 5.23991  | 6.19276  | 5.516294 | 5.883025 | -0.142   | 0.0128   | 0.15     | 0.017247 | 1.458756 | 16 |
| 7617_at   | YPR131C NAT3   | 7.557997 | 7.420357 | 7.164079 | 6.778715 | 6.241518 | 6.744698  | 6.294616 | 6.321114 | 6.466813  | 6.468312 | 6.383488 | 5.897626 | 5.546767 | 6.568616 | 5.23057  | 6.2172   | -0.46    | 0.0557   | 6.66E-06 | 3.48E-06 | 3.80755  | 16 |
| 7618_f_at | YPR132W RPS23B | 11.82556 | 11.78138 | 11.94846 | 11.23549 | 10.5457  | 11.46106  | 10.95097 | 10.80693 | 10.96307  | 10.4627  | 10.08264 | 10.31856 | 9.357227 | 8.936484 | 9.099391 | 10.51142 | -0.699   | -0.00719 | 1.95E-08 | 5.83E-08 | 6.377014 | 18 |
| 7619_s_at | YPR132W RPS23B | 12.99894 | 13.07441 | 12.99447 | 12.73317 | 12.11996 | 12.91575  | 12.14938 | 12.46627 | 12.72269  | 12.20814 | 12.42501 | 12.13607 | 11.953   | 12.05013 | 11.72986 | 12.31066 | -0.282   | 0.042    | 0.000189 | 5.19E-05 | 2.113713 | 16 |
| 7620_at   | YPR133C SPN1   | 7.694889 | 7.814285 | 7.647689 | 7.342313 | 7.447106 | 7.270938  | 6.645937 | 7.24333  | 7.041068  | 6.973492 | 7.020655 | 6.517277 | 6.823651 | 6.813256 | 6.277656 | 6.786601 | -0.275   | 0.111    | 0.0221   | 0.003129 | 2.04718  | 14 |
| 7621_at   | YPR133W TOM5   | 9.209367 | 9.332832 | 9.627733 | 9.354516 | 9.083153 | 9.968766  | 8.219495 | 8.56415  | 9.208358  | 8.633153 | 9.212847 | 9.937111 | 9.018828 | 9.428583 | 9.017131 | 9.075745 | -0.0504  | 0.0583   | 0.712    | 0.06988  | 1.281486 | 13 |
| 7622_at   | YPR134W MSS18  | 7.010242 | 6.841625 | 6.391655 | 6.630443 | 6.58076  | 6.381725  | 6.496005 | 6.491939 | 6.525777  | 6.867539 | 6.473476 | 6.128501 | 7.633702 | 7.146192 | 6.67389  | 6.483385 | 0.0962   | 0.128    | 0.0188   | 0.002715 | 1.586355 | 13 |
| 7623_at   | YPR135W CTF4   | 6.339083 | 6.352446 | 6.664408 | 6.33214  | 6.331972 | 6.886873  | 6.356644 | 6.241478 | 6.360045  | 6.28607  | 6.37528  | 6.251869 | 5.987865 | 6.133497 | 6.080033 | 6.347513 | -0.105   | -0.0222  | 0.0213   | 0.003031 | 3.21765  | 13 |
| 7624_at   | YPR136C        | 4.269983 | 4.317494 | 3.708994 | 4.071034 | 3.924917 | 4.486127  | 3.788372 | 3.935241 | 3.939634  | 3.967202 | 4.301075 | 3.670833 | 4.58947  | 4.206885 | 4.409053 | 3.973974 | 0.0348   | 0.06     | 0.349    | 0.036821 | 1.218786 | 10 |
| 7625_at   | YPR137W RRP9   | 7.150885 | 7.460795 | 7.062327 | 6.65666  | 6.780154 | 6.368799  | 6.421745 | 6.58769  | 6.028163  | 6.541609 | 6.013003 | 5.324317 | 6.920136 | 6.406858 | 5.973308 | 6.123981 | -0.228   | 0.196    | 0.00371  | 0.000657 | 2.315429 | 14 |
| 7626_at   | YPR138C MEP3   | 8.29737  | 8.005393 | 8.580479 | 9.638101 | 9.175657 | 9.193704  | 8.827117 | 9.120385 | 9.253354  | 9.07645  | 9.013003 | 9.997733 | 10.61946 | 10.01062 | 10.39096 | 9.520024 | 0.5      | -0.0487  | 2.46E-05 | 9.68E-06 | 3.7631   | 7  |
| 7627_at   | YPR139C VPS66  | 6.852279 | 6.974566 | 7.052493 | 6.933175 | 7.083408 | 6.840077  | 6.646312 | 6.678011 | 6.508236  | 6.159066 | 5.904235 | 5.584402 | 5.374994 | 5.685525 | 5.262554 | 6.293576 | -0.443   | -0.0209  | 3.97E-06 | 2.35E-06 | 3.234838 | 16 |
| 7628_at   | YPR140W TAZ1   | 6.522333 | 6.610363 | 6.255672 | 7.561051 | 7.49369  | 7.514086  | 7.624142 | 7.858437 | 7.712994  | 7.484297 | 7.4485   | 7.541402 | 6.584962 | 6.716715 | 6.304319 | 7.71551  | -0.0258  | -0.341   | 1.41E-07 | 2.17E-07 | 2.341726 | 12 |
| 7629_at   | YPR099C        | 4.631846 | 4.848283 | 4.205465 | 4.354581 | 4.179606 | 4.577533  | 4.968946 | 4.479031 | 4.813382  | 4.844642 | 4.796577 | 4.25097  | 4.47083  | 4.602471 | 4.311839 | 4.606724 | -0.0093  | -0.0306  | 0.775    | 0.075626 | 1.090911 | 13 |
| 7630_at   | YPR100W MRPL51 | 8.628711 | 8.177055 | 8.181163 | 8.709265 | 8.005594 | 8.588327  | 8.034303 | 8.666942 | 8.783543  | 9.041631 | 8.75125  | 8.283621 | 8.293332 | 8.224373 | 7.922858 | 8.735512 | -0.00633 | -0.157   | 0.00936  | 0.001466 | 1.472291 | 16 |
| 7631_at   | YPR101W SNT309 | 6.089891 | 6.011534 | 5.915716 | 6.12209  | 6.465172 | 5.969512  | 6.066894 | 6.133808 | 6.260123  | 6.825134 | 7.140696 | 6.97936  | 6.51817  | 6.197772 | 6.21964  | 6.373312 | 0.181    | -0.0701  | 0.253    | 0.027603 | 1.616343 | 9  |
| 7632_i_at | YPR102C RPL11A | 11.59276 | 11.71391 | 12.08787 | 11.37641 | 11.22879 | 11.76616  | 9.512993 | 10.58189 | 10.85536  | 9.854203 | 10.2612  | 10.49826 | 9.741742 | 10.62588 | 10.10499 | 10.38968 | -0.461   | 0.171    | 0.00175  | 0.000344 | 3.91567  | 14 |
| 7633_s_at | YPR102C RPL11A | 11.84716 | 11.98695 | 12.11144 | 11.47279 | 11.62262 | 11.81854  | 9.277425 | 10.67399 | 10.84343  | 9.991693 | 10.29473 | 10.04194 | 9.939775 | 9.710993 | 9.516559 | 10.3429  | -0.668   | 0.126    | 0.000174 | 4.83E-05 | 5.877029 | 18 |
| 7634_at   | YPR103W PRE2   | 10.24216 | 10.56462 | 10.8406  | 10.8398  | 10.77546 | 10.62858  | 9.465466 | 10.28575 | 10.5903   | 10.4826  | 10.4037  | 10.97994 | 10.07157 | 10.0853  | 10.40941 | 10.46878 | -0.08    | -0.0242  | 0.552    | 0.055608 | 1.236306 | 13 |
| 7635_at   | YPR104C FHL1   | 4.589461 | 4.388886 | 3.598047 | 4.070899 | 3.946804 | 3.863151  | 4.249228 | 4.221    | 4.195266  | 4.59144  | 4.202176 | 4.080303 | 5.912205 | 5.065494 | 4.839526 | 4.232268 | 0.288    | 0.134    | 0.00112  | 0.000234 | 2.286183 | 8  |
| 7636_at   | YPR105C C0C4   | 6.277173 | 6.362374 | 5.9764   | 5.794437 | 5.87715  | 5.872142  | 5.639159 | 5.721529 | 5.882746  | 5.313743 | 5.189242 | 5.70393  | 5.717428 | 5.611002 | 5.428283 | 5.421356 | -0.189   | 0.136    | 7.16E-05 | 2.32E-05 | 1.886514 | 14 |
| 7637_at   | YPR106W ISR1   | 6.160826 | 6.288607 | 5.851189 | 6.204468 | 6.015687 | 6.521782  | 6.298489 | 6.458861 | 6.129641  | 6.090346 | 6.343843 | 6.743109 | 6.286077 | 6.995149 | 6.55128  | 6.358792 | 0.13     | -0.00059 | 0.0687   | 0.008626 | 1.412588 | 13 |
| 7638_at   | YPR107C YTH1   | 6.296084 | 6.294759 | 5.99711  | 5.970048 | 5.848989 | 5.878013  | 5.999457 | 6.176329 | 5.900215  | 6.083547 | 6.206062 | 6.711844 | 5.915924 | 6.009247 | 6.624132 | 6.01792  | -0.0585  | -0.00319 | 0.288    | 0.031007 | 1.167823 | 13 |
| 7639_at   | YPR108W RPN7   | 9.676192 | 9.352116 | 9.053228 | 9.001662 | 9.010197 | 8.451522  | 9.276134 | 9.182901 | 9.916218  | 9.10363  | 8.996667 | 8.628967 | 8.632198 | 8.53011  | 8.269744 | 8.891921 | -0.202   | 0.0015   | 0.129    | 0.001832 | 1.710129 | 16 |
| 7640_at   | YPR109W        | 6.724598 | 6.597035 | 5.906144 | 6.913959 | 7.027273 | 6.661934  | 6.956326 | 6.983227 | 6.849534  | 7.11399  | 6.787598 | 6.688783 | 6.45891  | 6.419438 | 6.248788 | 6.945704 | -0.0175  | -0.15    | 0.00467  | 0.000804 | 1.464801 | 12 |
| 7641_at   | YPR110C RPC40  | 7.779692 | 7.725097 | 6.999732 | 6.925662 | 7.177789 | 6.829141  | 7.177789 | 6.930299 | 6.9599101 | 6.820138 | 6.890047 | 6.107914 | 6.589812 | 5.576112 | 5.289935 | 6.745354 | -0.498   | -0.0679  | 6.5E-06  | 3.43E-06 | 3.739581 | 18 |
| 7642_at   | YPR111W DBF20  | 4.848728 | 4.76     |          |          |          |           |          |          |           |          |          |          |          |          |          |          |          |          |          |          |          |    |

|           |                |          |          |          |          |          |          |          |          |          |          |          |          |          |          |          |          |         |          |          |          |          |    |
|-----------|----------------|----------|----------|----------|----------|----------|----------|----------|----------|----------|----------|----------|----------|----------|----------|----------|----------|---------|----------|----------|----------|----------|----|
| 7674_at   | YPR058C        | 10.09844 | 10.19382 | 10.10155 | 11.1196  | 10.84275 | 11.02489 | 11.26175 | 10.66613 | 11.33266 | 11.44998 | 11.23215 | 11.45074 | 9.695164 | 10.31563 | 10.02837 | 11.31395 | -0.012  | -0.341   | 4.75E-06 | 2.70E-06 | 2.309422 | 12 |
| 7675_at   | YPR055W SEC8   | 4.699686 | 4.661291 | 5.521136 | 4.647995 | 4.665027 | 4.388386 | 4.274486 | 4.701271 | 4.255593 | 4.804062 | 4.59299  | 4.689578 | 4.482247 | 4.429301 | 4.231    | 4.593501 | -0.122  | 0.017    | 0.148    | 0.017055 | 1.382127 | 16 |
| 7676_at   | YPR056W TFB8   | 7.13425  | 7.027042 | 7.085097 | 6.6987   | 6.671597 | 6.253926 | 6.896839 | 6.629814 | 6.197986 | 6.379365 | 5.977854 | 5.751953 | 5.420731 | 5.10866  | 4.978146 | 6.223786 | -0.492  | -0.0291  | 1.4E-06  | 1.11E-06 | 3.680743 | 16 |
| 7677_at   | YPR057W BRR1   | 7.261454 | 7.413131 | 7.97796  | 7.189403 | 7.194064 | 6.811383 | 7.399062 | 7.146863 | 6.673935 | 7.520373 | 7.375398 | 7.276944 | 7.440665 | 7.208208 | 6.824536 | 7.145963 | -0.0561 | 0.0517   | 0.484    | 0.049352 | 1.240252 | 13 |
| 7678_at   | YPR058W YMC1   | 8.520388 | 8.401031 | 8.991877 | 8.481265 | 8.447832 | 8.432829 | 8.55248  | 8.304651 | 8.576966 | 8.465944 | 8.506685 | 8.839052 | 6.989142 | 7.4319   | 7.380772 | 8.480686 | -0.309  | -0.15    | 6.18E-05 | 2.05E-05 | 2.458242 | 15 |
| 7679_at   | YPR059C        | 3.315252 | 3.543751 | 5.126672 | 3.334808 | 3.800983 | 3.13789  | 3.371597 | 3.288422 | 3.143169 | 3.870119 | 3.429401 | 3.261327 | 3.954168 | 3.965207 | 3.764414 | 3.328966 | 0.00805 | 0.164    | 0.137    | 0.015972 | 1.498137 | 13 |
| 7680_at   | YPR060C ARO7   | 8.246867 | 8.081293 | 8.329267 | 7.735455 | 8.060157 | 7.38503  | 7.430808 | 7.101146 | 7.23169  | 7.114898 | 6.771694 | 6.4257   | 6.170835 | 5.97502  | 6.03918  | 7.016756 | -0.575  | 0.037    | 2.04E-07 | 2.74E-07 | 4.59301  | 18 |
| 7681_at   | YPR061C JID1   | 5.088749 | 4.65433  | 5.561422 | 5.983183 | 5.526875 | 4.896281 | 4.785927 | 6.702763 | 6.189604 | 8.78191  | 8.113195 | 8.107979 | 7.870849 | 7.935008 | 8.011402 | 7.354229 | 0.884   | -0.25    | 0.000152 | 4.32E-05 | 10.41061 | 4  |
| 7682_at   | YPR062W FCY1   | 10.9046  | 10.66783 | 10.96148 | 10.70152 | 10.53687 | 10.22253 | 10.86435 | 10.7644  | 10.45614 | 11.07953 | 10.71652 | 10.19636 | 10.05625 | 9.600308 | 9.285264 | 10.5775  | -0.269  | -0.0974  | 0.00226  | 0.000429 | 2.047888 | 15 |
| 7683_at   | YPR063C        | 9.213667 | 9.131096 | 9.311436 | 9.206579 | 9.152073 | 9.426038 | 9.004459 | 8.85059  | 9.128003 | 9.818798 | 9.93835  | 9.491349 | 7.903548 | 8.242932 | 8.095626 | 9.078397 | -0.275  | -0.118   | 3.88E-05 | 1.40E-05 | 2.158958 | 15 |
| 7684_at   | YPR064W        | 5.507201 | 5.350526 | 6.013598 | 5.05514  | 5.056169 | 5.40484  | 5.219746 | 5.045541 | 4.975082 | 5.271157 | 5.102473 | 4.935108 | 5.01362  | 4.951122 | 5.107162 | 5.038425 | -0.138  | 0.0761   | 0.00655  | 0.01008  | 1.502107 | 16 |
| 7685_at   | YPR065W ROX1   | 7.250146 | 6.967197 | 7.595092 | 7.398963 | 7.299292 | 6.684848 | 6.328554 | 7.828526 | 7.696766 | 8.839907 | 8.41605  | 7.977613 | 7.08389  | 7.526282 | 7.219443 | 8.082255 | 0.226   | -0.315   | 0.00525  | 0.00089  | 3.084736 | 10 |
| 7686_at   | YPR066W UBA3   | 6.590139 | 5.854959 | 5.379854 | 5.753276 | 5.707874 | 5.997383 | 5.851414 | 5.795587 | 6.050757 | 6.166961 | 6.003523 | 6.657095 | 6.32285  | 6.388469 | 6.067645 | 5.895786 | 0.0859  | 0.0551   | 0.189    | 0.02125  | 1.318036 | 13 |
| 7687_at   | YPR067W ISA2   | 6.647967 | 6.698257 | 6.418503 | 7.074033 | 6.439527 | 7.454569 | 6.990486 | 6.840836 | 7.324131 | 7.253378 | 6.969479 | 7.478329 | 7.176034 | 7.212888 | 7.361508 | 7.18514  | 0.171   | -0.0723  | 0.0148   | 0.002192 | 1.57206  | 9  |
| 7688_at   | YPR068C HOS1   | 4.507712 | 4.774642 | 4.168153 | 4.320386 | 3.666787 | 4.41105  | 4.308315 | 4.308453 | 4.583975 | 4.41203  | 4.469298 | 4.332736 | 4.049384 | 4.429949 | 4.019896 | 4.306173 | -0.0535 | -0.00203 | 0.63     | 0.062633 | 1.152407 | 13 |
| 7689_at   | YPR069C SPC3   | 7.044296 | 7.281796 | 7.54255  | 6.425568 | 5.549965 | 6.953834 | 5.383487 | 5.663562 | 6.468048 | 5.103171 | 6.102406 | 5.744521 | 5.407749 | 5.801809 | 5.650101 | 5.830581 | -0.395  | 0.168    | 0.00805  | 0.001289 | 2.849388 | 14 |
| 7690_at   | YPR070W MCD1   | 5.614427 | 5.532486 | 4.614415 | 5.230556 | 5.200634 | 5.343163 | 4.932579 | 4.966663 | 5.391019 | 4.811619 | 5.192406 | 5.070278 | 4.477718 | 4.784992 | 4.365121 | 4.925212 | -0.182  | -0.0174  | 0.151    | 0.017349 | 1.620192 | 16 |
| 7691_at   | YPR071W        | 5.604537 | 5.632516 | 4.657879 | 5.174727 | 5.283292 | 5.42938  | 4.564918 | 4.873987 | 5.842087 | 4.753397 | 5.172336 | 5.034117 | 4.364855 | 4.189487 | 3.847278 | 5.055959 | -0.297  | -0.0924  | 0.00434  | 0.000784 | 2.199712 | 15 |
| 7692_at   | YPR072W NCT5   | 6.887594 | 7.321362 | 6.698215 | 6.625555 | 6.805576 | 6.799557 | 6.820989 | 6.577728 | 6.895907 | 6.200765 | 6.481499 | 6.493132 | 6.215113 | 6.58137  | 6.552083 | 6.521655 | -0.149  | 0.0533   | 0.00518  | 0.000851 | 1.486005 | 16 |
| 7693_at   | YPR073C LTK1   | 6.589319 | 6.505372 | 6.462628 | 5.785261 | 6.149445 | 5.899528 | 5.974906 | 5.719284 | 6.118995 | 5.420126 | 5.685286 | 5.333834 | 6.321296 | 4.040799 | 3.772088 | 5.611329 | -0.66   | -0.118   | 2.44E-09 | 1.74E-09 | 5.744768 | 18 |
| 7694_at   | YPR074C TLP1   | 10.76245 | 10.79016 | 10.56755 | 10.61511 | 10.57144 | 10.62852 | 10.28269 | 10.34209 | 10.56194 | 9.80484  | 9.966384 | 9.936476 | 8.90579  | 8.94334  | 9.772064 | 10.16151 | -0.477  | -0.0923  | 0.006-11 | 3.25E-09 | 5.542253 | 18 |
| 7695_at   | YPR075C OPY2   | 7.109773 | 7.098537 | 6.356734 | 7.694755 | 7.448289 | 8.454189 | 7.984515 | 8.472616 | 8.437852 | 8.609521 | 9.115684 | 9.749971 | 8.768948 | 9.212229 | 9.264935 | 8.777238 | 0.615   | -0.226   | 1.83E-05 | 7.61E-06 | 5.105122 | 4  |
| 7696_at   | YPR076W        | 3.929435 | 3.67363  | 3.456859 | 3.722678 | 3.988828 | 3.826444 | 4.069048 | 4.063172 | 3.898204 | 4.209575 | 4.017969 | 3.746779 | 3.733202 | 3.782147 | 3.583890 | 3.954773 | 0.0182  | -0.075   | 0.0771   | 0.009539 | 1.234691 | 13 |
| 7697_i_at | YPR077C        | 4.808508 | 4.277113 | 5.553255 | 5.480109 | 5.455561 | 5.900785 | 5.509771 | 5.985347 | 5.262185 | 6.623813 | 6.953134 | 6.176952 | 6.178926 | 6.79487  | 6.7837   | 6.361558 | 0.522   | -0.178   | 0.000577 | 0.000167 | 3.986821 | 7  |
| 7698_at   | YPR035W GLN1   | 11.51876 | 11.52462 | 11.56355 | 11.72813 | 11.584   | 11.63861 | 11.6792  | 11.21706 | 11.77284 | 11.79308 | 11.13691 | 11.43746 | 12.03793 | 12.08397 | 12.20363 | 11.55296 | 0.119   | 0.0776   | 0.0116   | 0.00177  | 1.470738 | 13 |
| 7699_at   | YPR036W VMA13  | 10.28669 | 10.43773 | 10.69001 | 9.848008 | 9.743454 | 10.09984 | 9.417225 | 9.292956 | 9.596128 | 9.427588 | 9.057336 | 8.863404 | 11.7207  | 11.46735 | 11.01916 | 9.318993 | 0.174   | 0.452    | 8.6E-06  | 4.23E-06 | 3.81427  | 8  |
| 7700_at   | YPR037C ERV2   | 8.664019 | 8.602059 | 8.774164 | 8.756834 | 8.128949 | 8.828599 | 8.159467 | 8.335755 | 8.746375 | 9.266207 | 8.100256 | 8.168884 | 7.878838 | 8.141741 | 7.788953 | 8.263969 | -0.229  | 0.00553  | 0.00164  | 0.000325 | 1.872148 | 16 |
| 7701_at   | YPR038W MCD1   | 4.959882 | 4.997938 | 4.097466 | 4.402578 | 4.148905 | 4.622948 | 4.692429 | 4.160991 | 5.13377  | 4.631217 | 4.601481 | 4.085224 | 7.206828 | 8.585018 | 6.983857 | 4.517815 | 0.474   | 0.322    | 0.000123 | 3.61E-05 | 4.539445 | 8  |
| 7702_g_at | YPR038W IRC16  | 6.840208 | 6.757816 | 6.239002 | 6.443185 | 6.367861 | 6.553551 | 5.843651 | 6.079938 | 6.638672 | 6.156778 | 6.272727 | 5.837927 | 6.004903 | 7.226702 | 7.807893 | 6.260404 | 0.247   | 0.246    | 0.000363 | 8.94E-05 | 2.700225 | 8  |
| 7703_at   | YPR039W        | 4.442502 | 4.584192 | 4.28359  | 4.467549 | 4.27506  | 4.695669 | 4.036544 | 4.071281 | 4.502448 | 4.47309  | 4.537503 | 3.846486 | 5.949416 | 5.055324 | 5.736193 | 4.315456 | 0.262   | 0.196    | 0.000392 | 9.55E-05 | 2.465507 | 8  |
| 7704_at   | YPR040W TIP41  | 6.99941  | 7.122203 | 7.175744 | 7.41314  | 7.503068 | 7.843617 | 7.3227   | 7.654883 | 7.797234 | 7.981908 | 8.055451 | 8.284987 | 8.34206  | 8.203174 | 8.376218 | 7.905622 | 0.326   | -0.0555  | 2.66E-06 | 1.75E-06 | 2.369955 | 7  |
| 7705_at   | YPR041W TIF5   | 7.794112 | 7.906928 | 7.533682 | 7.054948 | 7.113175 | 7.42695  | 6.672081 | 6.831091 | 6.916972 | 6.46105  | 6.404524 | 6.636216 | 6.76706  | 6.590792 | 6.189825 | 6.634814 | -0.335  | 0.139    | 3.43E-06 | 2.11E-06 | 2.433602 | 14 |
| 7706_at   | YPR042C PUF2   | 5.642104 | 5.544628 | 5.399076 | 5.578963 | 5.283164 | 5.623829 | 5.254436 | 5.72535  | 5.874108 | 5.742759 | 6.023805 | 6.16589  | 7.428691 | 6.837927 | 6.986786 | 5.786363 | 0.409   | 0.142    | 1.01E-06 | 8.59E-07 | 2.957388 | 8  |
| 7707_i_at | YPR043W RPL43A | 10.87192 | 11.11266 | 11.76458 | 10.67247 | 10.55765 | 11.4007  | 9.791084 | 10.11644 | 10.38308 | 9.319239 | 9.458322 | 10.25965 | 9.345643 | 9.437042 | 9.807169 | 9.956198 | -0.485  | 0.124    | 0.000358 | 8.83E-05 | 3.6205   | 18 |
| 7708_f_at | YPR043W RPL43A | 12.55386 | 12.71316 | 12.90347 | 12.34048 | 12.29218 | 12.7427  | 11.66879 | 12.05913 | 11.91958 | 11.18457 | 11.51322 | 11.79381 | 11.53361 | 11.68252 | 11.44423 | 11.74581 | -0.344  | 0.114    | 8.27E-05 | 2.61E-05 | 2.486569 | 14 |
| 7709_at   | YPR044C OPI11  | 6.028562 | 6.486144 | 5.826966 | 5.177899 | 5.935515 | 5.746942 | 6.008208 | 5.8748   | 6.032866 | 5.652054 | 5.8855   | 5.496845 | 5.730979 | 6.413227 | 5.984202 | 5.716779 | -0.0149 | 0.0955   | 0.203    | 0.022664 | 1.290121 | 13 |
| 7710_at   | YPR045C MNI2   | 3.496765 | 3.171011 | 2.736865 | 3.160597 | 3.030587 | 3.087476 | 3.234255 | 3.442442 | 3.23969  | 3.063021 | 3.238444 | 3.348272 | 3.2871   | 3.215063 | 3.130404 | 3.22502  | 0.0232  | -0.0161  | 0.755    | 0.0739   | 1.071915 | 13 |
| 7711_at   | YPR046W MCM16  | 5.625151 | 5.389475 | 4.884475 | 4.91721  | 4.823312 | 4.5476   | 4.568275 | 4.954732 | 4.539596 | 4.257608 | 4.72385  | 4.186838 | 5.196823 | 4.862566 | 4.453647 | 4.47964  | -0.13   | 0.161    | 0.00699  | 0.001142 | 1.822281 | 14 |
| 7712_at   | YPR047W MCF1   | 4.975778 | 5.256962 | 4.830773 | 5.291735 | 5.484972 | 5.517661 | 5.599834 | 5.281435 | 4.952379 | 4.464555 | 4.441416 | 4.550964 | 3.738241 | 3.837333 | 3.775279 | 4.976965 | -0.458  | -0.15    | 1.65E-05 | 6.99E-06 | 2.825396 | 15 |
| 7713_at   | YPR048W TAH18  | 7.100514 | 6.928843 | 6.294407 | 6.259424 | 6.463994 | 6.220304 | 6.378637 | 6.214028 | 6.332264 | 6.19413  | 5.931949 | 5.902554 | 6.670536 | 6.713088 | 5.784516 | 6.098099 | -0.269  | 0.0399   | 8.47E-05 | 2.66E-05 | 2.042163 | 16 |
| 7714_at   | YPR049C ATG11  | 5.375621 | 5.7587   | 5.757927 | 5.951766 | 5.88552  | 5.948452 | 6.375263 | 6.294521 | 5.946292 | 6.731188 | 6.667145 | 6.544538 | 6.456998 | 6.812651 | 6.561109 | 6.411412 | 0.284   | -0.0836  | 2.19E-05 | 8.82E-06 | 2.121129 | 9  |
| 7715_at   | YPR050C        | 4.819625 | 4.627365 | 4.126126 |          |          |          |          |          |          |          |          |          |          |          |          |          |         |          |          |          |          |    |

|         |         |        |          |          |          |          |          |          |           |          |          |          |          |          |          |          |          |          |          |          |          |          |          |    |
|---------|---------|--------|----------|----------|----------|----------|----------|----------|-----------|----------|----------|----------|----------|----------|----------|----------|----------|----------|----------|----------|----------|----------|----------|----|
| 7746_at | YPL007C | TFC8   | 3.636215 | 3.848705 | 5.311035 | 3.58303  | 3.58303  | 3.489534 | 3.793367  | 3.385807 | 3.36325  | 3.568503 | 3.366879 | 3.450693 | 3.182818 | 3.299597 | 3.072026 | 3.385802 | -0.251   | 0.0887   | 0.0228   | 0.003212 | 1.946948 | 16 |
| 7747_at | YPL006W | NCR1   | 8.367679 | 8.539959 | 8.410788 | 8.587495 | 8.376715 | 8.313523 | 9.020477  | 8.517126 | 8.430996 | 8.235124 | 8.549902 | 8.604117 | 7.857894 | 8.182445 | 7.893979 | 8.519284 | -0.113   | -0.0874  | 0.00531  | 0.000898 | 1.486721 | 12 |
| 7748_at | YPL005W | AEP3   | 4.724144 | 4.539547 | 4.655642 | 4.955385 | 4.999677 | 4.509505 | 5.460131  | 5.000019 | 4.863205 | 5.294086 | 4.882517 | 4.864508 | 5.320008 | 4.898869 | 4.907405 | 4.985010 | 0.0256   | -0.00146 | 0.933    | 0.08301  | 1.070191 | 13 |
| 7749_at | YPL004C | LSP1   | 8.669925 | 8.322172 | 7.785467 | 8.524001 | 8.124213 | 7.720726 | 8.582708  | 8.908604 | 8.775881 | 8.051569 | 8.465427 | 8.654475 | 7.206145 | 6.898447 | 6.854621 | 8.347543 | -0.328   | -0.213   | 0.00049  | 0.000116 | 2.887166 | 15 |
| 7750_at | YPL003W | ULA1   | 4.161782 | 4.117176 | 5.473800 | 4.190439 | 4.164315 | 3.987072 | 4.534369  | 4.414678 | 3.903437 | 4.105627 | 3.934701 | 4.179075 | 3.899417 | 3.90499  | 3.919599 | 4.088662 | -0.162   | 0.0396   | 0.115    | 0.013649 | 1.550044 | 16 |
| 7751_at | YPL002C | SNF8   | 6.833716 | 6.512556 | 6.783601 | 6.635075 | 6.730329 | 6.2553   | 7.146164  | 6.842511 | 6.744544 | 6.920797 | 6.795838 | 6.539104 | 6.528167 | 6.647394 | 5.538649 | 6.734433 | -0.237   | -0.156   | 0.000132 | 3.83E-05 | 2.165607 | 15 |
| 7752_at | YPL001W | HAT1   | 5.262292 | 5.3196   | 6.153279 | 5.311023 | 5.358316 | 4.858388 | 5.047793  | 4.757366 | 4.977152 | 5.116305 | 5.064562 | 4.736071 | 4.142999 | 4.581897 | 4.216028 | 4.915961 | -0.304   | 0.00642  | 0.00107  | 0.000225 | 2.23893  | 16 |
| 7753_at | YPR001W | CIT3   | 3.840074 | 3.67072  | 5.015852 | 3.76809  | 3.820973 | 3.914134 | 4.062706  | 3.64796  | 3.629635 | 4.21864  | 4.235286 | 3.711172 | 4.965114 | 5.140051 | 4.700639 | 3.884818 | 0.207    | 0.183    | 0.00249  | 0.000465 | 2.177643 | 8  |
| 7754_at | YPR002W | PDH1   | 4.509273 | 4.275289 | 5.002494 | 4.55112  | 4.532102 | 4.229848 | 4.621235  | 4.544284 | 4.419666 | 4.760682 | 4.378466 | 4.373156 | 4.56667  | 4.686613 | 4.719714 | 4.489119 | 0.907    | 0.0778   | 0.0703   | 0.008812 | 1.398824 | 13 |
| 7755_at | YPR003C |        | 5.297271 | 5.233794 | 4.513818 | 5.206525 | 4.924236 | 5.349365 | 5.56383   | 5.305277 | 5.64222  | 5.27381  | 5.381796 | 5.352223 | 5.087292 | 5.467859 | 5.038294 | 5.39077  | 0.0461   | -0.0798  | 0.17     | 0.019344 | 1.306201 | 13 |
| 7756_at | YPR004C |        | 8.292428 | 8.501717 | 8.764801 | 8.788722 | 8.223356 | 9.167474 | 8.432131  | 8.232841 | 8.721944 | 8.168457 | 8.275695 | 8.648789 | 8.535297 | 8.848544 | 8.761952 | 8.49369  | 0.0187   | 0.0393   | 0.685    | 0.067539 | 1.130374 | 13 |
| 7757_at | YPR005C | HAL1   | 5.493587 | 5.510913 | 4.906429 | 6.117453 | 5.136486 | 6.310486 | 5.838093  | 5.817274 | 6.569762 | 6.206914 | 6.441866 | 6.921934 | 6.697865 | 6.937532 | 6.923194 | 6.366229 | 0.412    | -0.0717  | 0.000526 | 0.000123 | 2.980477 | 7  |
| 7758_at | YPR006C | ICL2   | 6.432857 | 6.398788 | 6.488864 | 6.861348 | 6.006836 | 7.127244 | 6.723291  | 6.504242 | 6.740279 | 6.121527 | 6.597454 | 6.629999 | 6.2121   | 6.745988 | 6.498607 | 6.594075 | -0.0119  | -0.0331  | 0.782    | 0.076232 | 1.101497 | 13 |
| 7759_at | YPR007C | REC8   | 5.230456 | 5.224337 | 4.954404 | 5.627396 | 5.228436 | 5.609354 | 5.238501  | 5.305897 | 5.680783 | 5.700804 | 5.677483 | 5.504071 | 5.759129 | 5.827569 | 5.301089 | 5.573605 | 0.126    | -0.0508  | 0.0179   | 0.002596 | 1.397798 | 13 |
| 7760_at | YPR008W | HAA1   | 6.435113 | 6.222118 | 5.753484 | 6.586012 | 6.414304 | 6.192023 | 5.010315  | 5.867463 | 6.466302 | 6.501461 | 6.392114 | 6.450992 | 7.671593 | 7.402479 | 7.043164 | 6.242739 | 0.313    | 0.146    | 0.00334  | 0.0006   | 2.454756 | 8  |
| 7761_at | YPR009W | SUT2   | 7.025466 | 7.069625 | 6.898203 | 6.685704 | 6.650099 | 6.454855 | 5.861123  | 5.903646 | 6.065243 | 6.552353 | 6.055749 | 5.815234 | 5.719945 | 5.540032 | 5.835848 | 5.93111  | -0.348   | 0.119    | 6.54E-06 | 3.44E-06 | 2.516715 | 14 |
| 7762_at | YPR010C | RPA135 | 8.770251 | 8.914938 | 8.396069 | 8.489434 | 8.521088 | 8.417788 | 8.353566  | 8.366725 | 8.077909 | 8.333113 | 8.376849 | 8.260454 | 7.155868 | 7.299292 | 6.950374 | 8.270779 | -0.374   | -0.101   | 2.85E-06 | 1.84E-06 | 2.695373 | 15 |
| 7763_at | YPR011C |        | 6.909648 | 6.884165 | 6.540247 | 6.702996 | 6.738268 | 6.750379 | 6.635612  | 6.832928 | 6.668429 | 6.778732 | 6.737316 | 6.635146 | 7.589024 | 7.159356 | 6.874552 | 6.720005 | 0.102    | 0.0759   | 0.00636  | 0.001052 | 1.420199 | 13 |
| 7764_at | YPR012W |        | 6.534765 | 6.862588 | 6.287425 | 6.452921 | 6.528375 | 6.487925 | 6.472269  | 6.760957 | 6.711746 | 6.206587 | 6.54748  | 6.37851  | 6.811068 | 6.45938  | 6.089711 | 6.490376 | -0.0889  | -0.0247  | 0.0703   | 0.00881  | 1.265727 | 13 |
| 7765_at | YPR013C |        | 8.421856 | 7.618893 | 7.017796 | 7.964932 | 7.957762 | 7.560385 | 8.216306  | 8.290209 | 8.306543 | 7.930005 | 7.916532 | 7.740972 | 6.721449 | 6.869886 | 6.173637 | 8.014273 | -0.194   | -0.198   | 0.00214  | 0.00041  | 2.205427 | 15 |
| 7766_at | YPL032C | SVL3   | 8.706406 | 8.973596 | 8.411464 | 8.797692 | 8.524843 | 8.541081 | 8.63306   | 8.340584 | 8.519798 | 8.753617 | 9.035429 | 8.699739 | 8.784402 | 8.931597 | 8.78689  | 8.650755 | 0.0526   | 0.0252   | 0.305    | 0.032603 | 1.164572 | 13 |
| 7767_at | YPL031C | PHO85  | 8.446673 | 8.66726  | 9.181492 | 8.969586 | 8.908145 | 9.456497 | 8.893934  | 8.548113 | 9.108875 | 8.514518 | 8.778015 | 8.763437 | 8.398803 | 8.746696 | 8.718872 | 8.861941 | -0.0698  | -0.0407  | 0.323    | 0.034363 | 1.241362 | 13 |
| 7768_at | YPL030W |        | 6.956278 | 6.971424 | 6.114601 | 6.413132 | 6.168977 | 6.502257 | 6.843754  | 6.107025 | 6.645329 | 6.680397 | 6.762629 | 6.589408 | 6.489624 | 6.96866  | 6.959939 | 6.526647 | -0.0216  | 0.0908   | 0.949    | 0.090713 | 1.058873 | 13 |
| 7769_at | YPR029W | SUV3   | 6.747963 | 6.845485 | 6.308889 | 7.103799 | 6.426806 | 7.148232 | 7.163824  | 6.546387 | 6.994253 | 6.625202 | 6.906404 | 6.90001  | 6.829989 | 6.939162 | 6.308084 | 6.892557 | 0.0060   | -0.0611  | 0.457    | 0.046939 | 1.163074 | 13 |
| 7770_at | YPL028W | ERG10  | 11.88339 | 11.81857 | 11.74418 | 12.36206 | 11.29474 | 12.22398 | 11.94414  | 12.12575 | 12.50604 | 12.27248 | 12.66819 | 12.60043 | 11.85044 | 12.0165  | 11.94152 | 12.31675 | 0.0691   | -0.126   | 0.0716   | 0.008946 | 1.514949 | 12 |
| 7771_at | YPL027W | SM1    | 5.617596 | 5.112058 | 4.821268 | 6.09235  | 6.142884 | 6.151045 | 5.460753  | 6.086461 | 6.298899 | 6.232718 | 6.506269 | 5.991672 | 6.345844 | 6.773464 | 6.251151 | 6.236759 | 0.303    | 0.113    | 0.00122  | 0.000252 | 2.32191  | 9  |
| 7772_at | YPL026C | SKS1   | 7.73315  | 7.559455 | 6.428587 | 8.228168 | 8.141269 | 8.172678 | 6.790788  | 7.763313 | 7.878954 | 8.981372 | 9.066862 | 8.887259 | 10.26087 | 9.4566   | 10.00398 | 8.519134 | 0.711    | 0.0172   | 0.001668 | 4.70E-05 | 6.581665 | 6  |
| 7773_at | YPL025C |        | 3.328248 | 3.227844 | 2.7866   | 3.232229 | 3.152019 | 3.278059 | 2.993264  | 2.981322 | 3.124185 | 3.103489 | 3.035787 | 3.027272 | 3.145879 | 3.071155 | 3.107006 | 3.080855 | -0.00714 | 0.00986  | 0.883    | 0.084916 | 1.036566 | 13 |
| 7774_at | YPL024W | RM1    | 5.888634 | 5.982045 | 5.688918 | 5.873584 | 6.077116 | 5.581582 | 6.126056  | 6.327051 | 6.283429 | 6.373733 | 6.397104 | 6.725974 | 7.01651  | 6.566708 | 7.424835 | 6.310005 | 0.319    | 0.0279   | 0.000164 | 4.58E-05 | 2.331083 | 7  |
| 7775_at | YPL023C | MET12  | 7.699311 | 7.644384 | 7.395311 | 7.392398 | 7.371815 | 7.425916 | 7.160858  | 7.310366 | 7.252027 | 7.212661 | 7.432383 | 7.273628 | 7.29584  | 7.542249 | 7.446433 | 7.26755  | -0.036   | 0.0652   | 0.000951 | 0.001486 | 1.240486 | 13 |
| 7776_at | YPL022W | RAD1   | 4.621774 | 4.574288 | 4.199308 | 4.561449 | 4.542438 | 4.548481 | 4.706335  | 4.566994 | 4.547498 | 4.356901 | 4.655269 | 4.328469 | 4.449025 | 4.135154 | 4.363367 | 4.533355 | -0.0479  | -0.0385  | 0.0976   | 0.011787 | 1.186902 | 13 |
| 7777_at | YPL021W | ECM23  | 3.572345 | 3.386377 | 3.291835 | 3.700493 | 3.626446 | 3.689389 | 3.66697   | 3.754071 | 3.818523 | 3.785388 | 3.902739 | 3.762881 | 4.791164 | 4.284559 | 4.924027 | 3.773914 | 0.258    | 0.0451   | 0.000307 | 1.35E-05 | 1.980714 | 8  |
| 7778_at | YPL020C | ULP1   | 6.517293 | 6.561638 | 6.583217 | 6.610917 | 6.722387 | 6.734021 | 6.972576  | 6.843121 | 6.597366 | 6.804299 | 6.798784 | 7.624162 | 8.723484 | 8.279679 | 8.443794 | 7.278922 | 0.551    | 0.0606   | 2.79E-07 | 3.35E-07 | 4.033374 | 7  |
| 7779_at | YPL019C | VNE43  | 6.496423 | 6.568034 | 6.013752 | 6.512767 | 6.517034 | 6.076813 | 6.722776  | 6.698152 | 6.493686 | 6.006953 | 6.676571 | 6.849949 | 7.275763 | 7.3228   | 7.217524 | 6.741836 | 0.292    | 0.0376   | 7.91E-05 | 2.52E-05 | 1.663544 | 7  |
| 7780_at | YPL018W | CTF19  | 3.36179  | 3.459933 | 2.938862 | 3.423411 | 3.258568 | 3.379181 | 3.664199  | 3.540336 | 3.577678 | 3.648225 | 3.70257  | 3.309916 | 3.703123 | 3.654707 | 3.827652 | 3.556227 | 0.121    | -0.0187  | 0.0127   | 0.001918 | 1.379434 | 13 |
| 7781_at | YPL017C | IRC15  | 4.903279 | 4.906251 | 3.752514 | 5.430138 | 5.399448 | 4.991576 | 6.245964  | 6.326638 | 6.376297 | 6.453325 | 6.632125 | 6.372147 | 7.145491 | 6.329036 | 7.342857 | 6.350937 | 0.638    | -0.176   | 4.55E-05 | 1.60E-05 | 5.422882 | 4  |
| 7782_at | YPL016W | SWI1   | 4.946034 | 5.041985 | 4.619562 | 5.262471 | 5.029106 | 4.853766 | 5.310116  | 4.939584 | 5.253779 | 5.865478 | 6.305266 | 6.789983 | 8.352047 | 7.496605 | 8.044996 | 5.747059 | 0.841    | 0.18     | 5.01E-08 | 1.09E-07 | 9.205463 | 6  |
| 7783_at | YPL015C | HS12   | 5.609422 | 5.488728 | 4.82313  | 5.669207 | 5.5291   | 5.504377 | 5.764641  | 6.001468 | 5.914412 | 6.193963 | 6.363677 | 7.235789 | 8.852907 | 6.417743 | 6.781602 | 6.252087 | 0.413    | -0.0771  | 0.00034  | 8.47E-05 | 2.599292 | 7  |
| 7784_at | YPL014W |        | 7.344423 | 6.88826  | 6.480795 | 7.511002 | 7.700342 | 7.28672  | 7.961763  | 7.435227 | 7.637689 | 8.280496 | 8.053881 | 8.433135 | 8.275542 | 7.589077 | 7.454628 | 7.988994 | 0.206    | -0.181   | 0.001    | 0.000214 | 2.356747 | 9  |
| 7785_at | YPL013C | MRPS16 | 9.62846  | 9.937427 | 10.59757 | 10.56699 | 10.80066 | 10.98778 | 10.515138 | 10.40055 | 10.82915 | 10.54918 | 9.762956 | 10.55551 | 9.399105 | 9.351529 | 10.2556  | 10.57041 | -0.142   | -0.188   | 0.0145   | 0.002156 | 1.965173 | 13 |
| 7786_at | YPL012W | RRP12  | 7.440888 | 7.768307 | 7.557174 | 6.580803 | 6.991712 | 6.868663 | 6.85349   | 7.036897 | 6.547505 | 6.5610   |          |          |          |          |          |          |          |          |          |          |          |    |

|           |         |          |          |          |          |          |          |          |          |          |          |          |          |          |          |          |          |          |          |          |          |          |          |    |
|-----------|---------|----------|----------|----------|----------|----------|----------|----------|----------|----------|----------|----------|----------|----------|----------|----------|----------|----------|----------|----------|----------|----------|----------|----|
| 7818_at   | YPL071C | 6.571963 | 6.583927 | 7.673238 | 7.380651 | 7.375334 | 7.217184 | 7.075899 | 6.962066 | 6.918895 | 6.882043 | 6.927151 | 7.025015 | 6.211703 | 6.285716 | 6.523512 | 7.059695 | -0.172   | -0.11    | 0.00804  | 0.001288 | 1.737947 | 15       |    |
| 7819_at   | YPL070W | MUK1     | 7.247186 | 7.263041 | 7.1613   | 7.273322 | 7.331453 | 6.9001   | 7.400501 | 7.223705 | 7.425168 | 7.030588 | 6.788479 | 6.92252  | 6.058809 | 6.038417 | 6.157704 | 7.094543 | -0.296   | -0.121   | 2.36E-07 | 3.00E-07 | 2.259991 | 15 |
| 7820_at   | YPL069C | BTS1     | 5.554811 | 5.425129 | 5.85088  | 5.163755 | 5.234933 | 4.89574  | 5.236534 | 5.018072 | 4.863757 | 5.027414 | 4.98005  | 5.135368 | 5.146917 | 4.954957 | 4.921827 | 4.977892 | -0.137   | 0.0882   | 0.0013   | 0.000266 | 1.544045 | 16 |
| 7821_at   | YPL068C | 3.952563 | 4.294837 | 5.536934 | 4.00072  | 3.777526 | 4.306143 | 4.02138  | 3.739557 | 4.484213 | 4.608467 | 4.660308 | 4.767827 | 4.675698 | 5.076519 | 4.19513  | 4.19513  | 4.19513  | 0.122    | 0.137    | 0.0845   | 0.010361 | 1.689696 | 13 |
| 7822_at   | YPL067C | 7.35793  | 6.908596 | 7.040469 | 7.403556 | 7.120646 | 7.67555  | 6.54663  | 6.722386 | 7.131293 | 6.621602 | 7.213881 | 7.151705 | 6.913082 | 7.09015  | 7.263949 | 7.026844 | -0.025   | 0.0256   | 0.837    | 0.081001 | 1.170506 | 13       |    |
| 7823_at   | YPL066W | 5.430958 | 5.518473 | 5.966975 | 5.390044 | 5.534058 | 5.349431 | 5.22817  | 4.958324 | 5.252024 | 6.03449  | 5.201409 | 5.391972 | 5.16167  | 5.070644 | 5.301751 | 5.160193 | -0.122   | 0.0696   | 0.00856  | 0.001357 | 1.439826 | 16       |    |
| 7824_at   | YPL065W | VPS28    | 5.600129 | 5.481382 | 5.920697 | 5.448206 | 5.432172 | 5.303015 | 5.447068 | 5.236934 | 5.408538 | 5.140573 | 5.183191 | 4.994206 | 4.281378 | 4.328651 | 4.148235 | 5.192524 | -0.356   | -0.0655  | 3.46E-08 | 8.58E-08 | 2.570492 | 16 |
| 7825_at   | YPL064C | CWC27    | 5.534998 | 5.407097 | 5.322193 | 5.455874 | 5.437365 | 5.410502 | 5.365962 | 5.461708 | 5.550681 | 5.427944 | 5.623877 | 5.459687 | 5.457116 | 5.560879 | 5.119102 | 5.45792  | -0.00479 | -0.0215  | 0.549    | 0.055338 | 1.059234 | 13 |
| 7826_at   | YPL063W | TIM50    | 7.683879 | 7.981758 | 7.712223 | 7.517753 | 7.204522 | 7.948008 | 7.42608  | 7.386841 | 7.424788 | 6.625113 | 7.035053 | 7.160396 | 6.390603 | 7.081364 | 6.687917 | 7.175999 | -0.302   | 0.0245   | 0.000327 | 8.19E-05 | 2.224751 | 16 |
| 7827_at   | YPL062W | 5.266025 | 5.310971 | 4.822589 | 5.096761 | 4.560161 | 5.199793 | 4.943337 | 4.886383 | 5.191355 | 4.765246 | 5.349472 | 4.906486 | 5.534725 | 5.31079  | 5.308404 | 4.979924 | 0.0657   | 0.0758   | 0.0758   | 0.009391 | 1.333391 | 13       |    |
| 7828_at   | YPL061W | ALD6     | 9.82454  | 9.874695 | 9.067464 | 9.906357 | 8.366485 | 9.644764 | 9.703558 | 10.14922 | 10.43006 | 9.374821 | 9.630838 | 10.23686 | 9.562244 | 9.466494 | 9.623134 | 9.766707 | 0.0105   | -0.0618  | 0.776    | 0.075729 | 1.180789 | 13 |
| 7829_at   | YPL060W | LPE10    | 4.85047  | 4.828534 | 4.521445 | 4.516248 | 4.536667 | 4.935512 | 4.563396 | 4.616509 | 4.933536 | 5.225467 | 4.778516 | 4.599501 | 4.695305 | 4.849665 | 4.426413 | 4.911696 | -0.0378  | -0.0536  | 0.396    | 0.041202 | 1.2075   | 13 |
| 7830_at   | YPL059W | GRX5     | 8.196748 | 8.223232 | 8.457334 | 8.250205 | 8.513152 | 8.699423 | 7.105143 | 7.483185 | 8.177297 | 7.282909 | 7.577008 | 7.854273 | 6.59782  | 7.012219 | 6.667339 | 7.731025 | -0.421   | -0.048   | 0.000633 | 0.000144 | 3.05269  | 16 |
| 7831_at   | YPL058C | PDR12    | 6.880725 | 8.943203 | 6.801157 | 9.216443 | 9.149345 | 8.647321 | 8.947158 | 8.823641 | 8.899673 | 9.333743 | 9.174689 | 9.591379 | 10.2426  | 9.10054  | 9.767643 | 9.387176 | 0.382    | -0.124   | 0.0221   | 0.003127 | 2.756086 | 7  |
| 7832_at   | YPL057C | SSR1     | 8.202444 | 7.728767 | 6.494619 | 8.10295  | 8.015938 | 7.654627 | 8.217761 | 8.631113 | 8.515726 | 8.611884 | 8.83334  | 9.655507 | 10.51892 | 9.833593 | 10.22739 | 8.626177 | 0.7      | 0.0556   | 1.26E-05 | 5.69E-06 | 6.389261 | 6  |
| 7833_at   | YPL056C | 6.532366 | 6.683137 | 6.434948 | 6.697923 | 6.259968 | 6.430129 | 6.611422 | 6.897025 | 6.531893 | 6.854033 | 7.685839 | 6.935859 | 8.655552 | 8.950414 | 8.051709 | 6.883922 | 0.532    | 0.181    | 1.54E-06 | 1.18E-06 | 4.093339 | 8        |    |
| 7834_at   | YPL101W | ELP4     | 7.553934 | 7.624975 | 7.620829 | 7.519732 | 7.497302 | 7.101675 | 7.448499 | 7.640367 | 7.296993 | 7.490385 | 7.339895 | 7.159423 | 7.211478 | 7.135344 | 6.929917 | 7.31941  | -0.121   | 0.00563  | 0.00435  | 0.000755 | 1.378075 | 16 |
| 7835_at   | YPL100W | ATG21    | 6.040258 | 6.405501 | 6.742659 | 6.611702 | 6.353722 | 6.216407 | 6.317081 | 6.432823 | 6.085534 | 6.349112 | 6.176282 | 6.040173 | 6.270108 | 6.28692  | 6.932526 | 6.252342 | -0.0703  | 0.00916  | 0.287    | 0.030954 | 1.204881 | 13 |
| 7836_at   | YPL099C | FMP14    | 5.776588 | 5.513509 | 5.327306 | 5.605678 | 5.657743 | 5.622607 | 5.818589 | 5.645441 | 5.7363   | 5.603669 | 5.682033 | 5.519489 | 5.185624 | 5.260842 | 4.823944 | 5.615812 | -0.127   | -0.0818  | 0.00273  | 0.000502 | 1.505365 | 15 |
| 7837_at   | YPL098C | MGR2     | 8.414683 | 8.482585 | 8.695366 | 8.523005 | 8.255763 | 8.915203 | 8.280823 | 8.26139  | 8.457804 | 8.029833 | 8.653307 | 8.939588 | 9.717108 | 8.518526 | 8.046424 | 8.464996 | -0.0805  | -0.034   | 0.312    | 0.033264 | 1.251365 | 13 |
| 7838_at   | YPL097W | MSY1     | 6.717022 | 6.677391 | 5.823756 | 6.926973 | 6.875758 | 6.914764 | 7.000999 | 6.662367 | 6.847425 | 6.685953 | 6.616911 | 6.376777 | 7.111758 | 6.62123  | 7.117472 | 6.789482 | -0.0191  | -0.0895  | 0.391    | 0.040784 | 1.289339 | 13 |
| 7839_at   | YPL096W | PNG1     | 7.640621 | 7.56925  | 7.533409 | 7.265332 | 7.07816  | 7.354377 | 7.513634 | 7.132902 | 7.284473 | 6.650099 | 6.748194 | 6.250706 | 6.082432 | 6.174624 | 5.949625 | 6.883825 | -0.417   | -0.0153  | 8.22E-07 | 7.27E-07 | 3.020784 | 16 |
| 7840_at   | YPL095C | EEB1     | 8.724333 | 8.657291 | 8.701415 | 9.858417 | 8.438117 | 9.723503 | 9.316597 | 9.313382 | 10.31166 | 9.962605 | 9.711396 | 10.52888 | 9.698399 | 9.812753 | 10.33718 | 9.886792 | 0.336    | -0.161   | 0.00576  | 0.000963 | 2.537533 | 9  |
| 7841_at   | YPL094C | SEC62    | 10.20805 | 10.07105 | 9.719339 | 10.18784 | 10.1235  | 9.936203 | 9.234725 | 9.793221 | 9.936282 | 9.576543 | 9.957417 | 10.01702 | 8.738028 | 8.978463 | 8.960456 | 9.80662  | -0.271   | -0.0976  | 0.000539 | 0.000126 | 2.059197 | 15 |
| 7842_at   | YPL093W | NOG1     | 8.814777 | 8.756221 | 8.355386 | 8.218031 | 8.445258 | 8.178499 | 9.945363 | 8.006389 | 8.035186 | 7.606757 | 7.6826   | 7.231592 | 7.44998  | 7.597009 | 7.232341 | 7.613276 | -0.333   | 0.115    | 0.00107  | 0.000225 | 2.416527 | 14 |
| 7843_at   | YPL092W | SSU1     | 10.3477  | 10.70045 | 10.8112  | 10.29103 | 10.3535  | 10.39351 | 9.985762 | 9.874449 | 10.11219 | 8.799754 | 9.362759 | 9.666374 | 8.23616  | 8.660219 | 8.895286 | 9.648271 | -0.56    | -0.00597 | 1.77E-06 | 1.29E-06 | 4.407913 | 18 |
| 7844_at   | YPL091W | GLR1     | 9.011513 | 9.039289 | 8.931343 | 9.237498 | 9.253536 | 9.048907 | 9.308865 | 8.990156 | 9.268714 | 9.100255 | 8.653718 | 8.898453 | 8.196106 | 8.27404  | 8.227316 | 9.059564 | -0.21    | -0.121   | 1.63E-06 | 1.22E-06 | 1.913399 | 15 |
| 7845_s_at | YPL090C | RPS6A    | 10.92785 | 10.99901 | 11.33417 | 10.45996 | 10.59932 | 10.85365 | 10.25691 | 10.21574 | 10.31769 | 9.629827 | 9.498374 | 9.626119 | 8.866256 | 8.957602 | 8.815426 | 9.926559 | -0.599   | 0.0189   | 1.43E-09 | 1.24E-08 | 4.889845 | 18 |
| 7846_at   | YPL089C | RLM1     | 7.34873  | 7.214183 | 7.113411 | 7.722585 | 7.666623 | 7.57481  | 7.747194 | 7.889006 | 7.775051 | 8.5294   | 8.523496 | 8.913119 | 9.008685 | 9.284866 | 9.579173 | 8.251656 | 0.566    | -0.00274 | 1.31E-08 | 8.08E-08 | 4.479079 | 7  |
| 7847_at   | YPL088W | 9.09441  | 8.92532  | 8.950324 | 8.594583 | 8.70659  | 8.377492 | 8.704882 | 8.477442 | 8.858733 | 8.786442 | 8.602939 | 8.896103 | 9.592709 | 9.584665 | 9.999476 | 8.621725 | 0.191    | 0.196    | 2.17E-07 | 2.84E-07 | 2.18167  | 8        |    |
| 7848_at   | YPL087W | YDC1     | 10.16713 | 9.710859 | 9.218699 | 10.91485 | 10.99074 | 10.52629 | 11.3058  | 11.21699 | 11.17848 | 11.19208 | 11.218   | 11.22235 | 11.22576 | 11.06691 | 10.85575 | 11.31471 | 0.325    | -0.258   | 1.86E-05 | 7.69E-06 | 3.13287  | 10 |
| 7849_at   | YPL086C | ELP3     | 6.850875 | 6.841859 | 6.421779 | 6.51295  | 6.378659 | 6.262653 | 6.594138 | 6.70095  | 6.321443 | 6.739248 | 6.408004 | 6.084254 | 6.582262 | 6.422991 | 9.505991 | 6.407445 | -0.089   | 0.0256   | 0.216    | 0.023969 | 1.266162 | 13 |
| 7850_at   | YPL085W | SEC16    | 6.861231 | 7.134544 | 6.639642 | 6.637291 | 6.520579 | 6.778651 | 6.859878 | 6.772361 | 6.653893 | 6.919399 | 6.991173 | 6.903436 | 6.802892 | 6.911787 | 7.907341 | 6.791733 | 0.298    | 0.177    | 5.49E-08 | 1.15E-07 | 2.533357 | 8  |
| 7851_at   | YPL084W | BRO1     | 6.275383 | 6.224801 | 5.846837 | 6.377596 | 6.197274 | 6.113836 | 6.233616 | 6.038405 | 6.15686  | 5.95332  | 6.055288 | 6.300392 | 5.404331 | 5.941482 | 5.707957 | 6.092177 | -0.124   | -0.0508  | 0.0227   | 0.003201 | 1.046763 | 16 |
| 7852_at   | YPL083C | SEN54    | 4.939059 | 5.227223 | 4.491688 | 4.833732 | 4.969264 | 4.721055 | 5.128874 | 4.888793 | 4.698412 | 4.81134  | 4.722433 | 4.574863 | 4.194961 | 4.279583 | 4.204852 | 4.785315 | -0.17    | -0.0635  | 0.00105  | 0.000221 | 1.580265 | 16 |
| 7853_at   | YPL082C | MOT1     | 4.746122 | 4.950518 | 4.470446 | 4.702549 | 4.798075 | 4.582008 | 4.578982 | 4.344964 | 4.167199 | 4.242974 | 4.271641 | 4.504043 | 4.726628 | 4.506103 | 4.638046 | 4.404677 | -0.0446  | 0.0775   | 0.0634   | 0.00803  | 1.295843 | 13 |
| 7854_i_at | YPL081W | RPS9A    | 7.350378 | 8.089225 | 7.564981 | 7.415827 | 7.479316 | 7.160997 | 7.729375 | 7.703534 | 6.912496 | 6.58822  | 6.011859 | 6.259851 | 7.509717 | 6.470962 | 7.508425 | 6.963349 | -0.239   | 0.136    | 0.0945   | 0.011446 | 2.041912 | 14 |
| 7855_f_at | YPL081W | RPS9A    | 9.305192 | 9.715442 | 10.22076 | 9.433543 | 9.391602 | 9.60598  | 8.803356 | 9.092116 | 8.44793  | 7.965265 | 7.441415 | 7.614988 | 8.636341 | 8.191078 | 8.465639 | 8.386814 | -0.444   | 0.206    | 0.000877 | 0.00019  | 3.35996  | 16 |
| 7856_at   | YPL080C | 4.139502 | 4.105011 | 4.421451 | 4.110732 | 4.310187 | 4.216037 | 4.050227 | 4.136614 | 3.764081 | 3.989233 | 3.737013 | 3.666924 | 3.803496 | 3.849032 | 3.826798 | 3.914667 | -0.128   | 0.0334   | 0.000507 | 0.000866 | 1.403196 | 16       |    |
| 7857_at   | YPL123C | RNY1     | 4.847524 | 4.912448 | 4.120449 | 6.129103 | 5.860239 | 5.553319 | 5.612733 | 5.994616 | 6.230062 | 6.004852 | 6.565514 | 6.055261 | 4.554319 | 4.607583 | 4.156574 | 6.127875 | -0.0711  | -0.448   | 3.37E-06 | 2.09E-06 | 3.178173 | 11 |
| 7858_at   | YPL122C | TFB2     | 6.975022 | 6.913797 | 6.486175 | 6.7536   | 6.429398 | 6.365422 | 6.606651 | 6.301105 | 6.586211 | 6.728985 | 6.928549 | 6.818124 | 6.670951 | 6.603366 | 6.5482   |          |          |          |          |          |          |    |

|         |         |            |          |          |          |          |          |          |          |          |          |          |          |          |          |          |          |          |          |          |          |          |          |    |
|---------|---------|------------|----------|----------|----------|----------|----------|----------|----------|----------|----------|----------|----------|----------|----------|----------|----------|----------|----------|----------|----------|----------|----------|----|
| 7890_at | YPL135W | ISU1       | 8.994111 | 8.337042 | 8.443545 | 8.932886 | 8.676059 | 8.972788 | 9.584238 | 9.459305 | 9.684767 | 10.341   | 10.16113 | 10.25786 | 10.69326 | 10.3656  | 11.18603 | 9.850431 | 0.605    | -0.0571  | 1.55E-06 | 1.18E-06 | 4.974735 | 6  |
| 7891_at | YPL134C | ODC1       | 6.705223 | 6.735536 | 6.621114 | 6.765086 | 7.717130 | 6.987622 | 7.61302  | 7.44055  | 6.722275 | 7.457761 | 7.211861 | 7.255966 | 8.098529 | 7.679054 | 7.194211 | 7.542111 | 0.202    | -0.0954  | 0.0175   | 0.002548 | 1.742381 | 9  |
| 7892_at | YPL133C | RDS2       | 6.788956 | 6.605068 | 6.769108 | 6.720437 | 6.807177 | 6.493078 | 7.175928 | 7.009965 | 6.862928 | 7.272526 | 7.287521 | 6.789887 | 7.13206  | 7.177564 | 6.718022 | 7.031665 | 0.9097   | -0.0486  | 0.0999   | 0.012029 | 1.301614 | 13 |
| 7893_at | YPL132W | COX11      | 8.065315 | 7.915098 | 7.652023 | 8.210877 | 8.353551 | 8.247509 | 8.249652 | 8.734964 | 8.011133 | 7.567734 | 7.686348 | 7.720928 | 7.075042 | 7.476943 | 7.03577  | 7.94174  | -0.216   | -0.105   | 0.000273 | 7.04E-05 | 1.873134 | 15 |
| 7894_at | YPL131W | RPL5       | 12.1129  | 12.12936 | 12.32722 | 11.78196 | 11.72599 | 12.16181 | 11.37912 | 11.26757 | 11.31741 | 10.03502 | 10.66902 | 11.035   | 9.644197 | 10.19564 | 10.14657 | 11.00349 | -0.615   | 0.0314   | 2.11E-06 | 1.47E-06 | 5.100865 | 18 |
| 7895_at | YPL130W | SPO19      | 3.445376 | 3.565667 | 3.15896  | 3.449022 | 3.226496 | 3.853241 | 3.70226  | 3.680879 | 3.691398 | 3.607811 | 3.960441 | 3.735588 | 4.018357 | 4.3945   | 3.99515  | 3.721958 | 0.161    | -0.00781 | 0.0185   | 0.002676 | 1.5324   | 13 |
| 7896_at | YPL129W | TAF14      | 7.504842 | 7.885097 | 7.930717 | 7.676926 | 6.562091 | 7.466046 | 6.871438 | 6.888031 | 6.974717 | 6.457423 | 6.401288 | 6.581261 | 6.628578 | 6.607418 | 6.258271 | 6.680095 | -0.352   | 0.128    | 0.000124 | 3.63E-05 | 2.540674 | 14 |
| 7897_at | YPL128C | TBF1       | 6.49449  | 6.52629  | 5.470401 | 6.034831 | 5.046391 | 6.109447 | 5.276162 | 5.741443 | 6.181654 | 5.730684 | 5.990055 | 6.232716 | 6.328086 | 6.408487 | 6.092558 | 5.793362 | 0.0564   | 0.113    | 0.226    | 0.024879 | 1.430468 | 13 |
| 7898_at | YPL127C | H01        | 7.493834 | 7.49806  | 7.138274 | 7.387249 | 7.290189 | 7.464066 | 5.745815 | 6.879883 | 7.081746 | 6.723651 | 6.964001 | 7.088843 | 6.695185 | 7.077532 | 6.761293 | 6.859196 | -0.142   | 0.0745   | 0.201    | 0.022488 | 1.504401 | 16 |
| 7899_at | YPL126W | NAN1       | 6.722646 | 7.075623 | 5.978986 | 6.032109 | 6.404022 | 5.982252 | 5.379923 | 6.31033  | 6.13021  | 6.424254 | 6.287007 | 6.175189 | 6.705884 | 6.305871 | 6.319984 | 6.07445  | -0.00771 | 0.119    | 0.18     | 0.020346 | 1.350111 | 13 |
| 7900_at | YPL125W | KAP120     | 6.213505 | 6.421248 | 5.691736 | 5.836284 | 5.961919 | 5.694241 | 5.674241 | 5.461496 | 5.76075  | 5.57094  | 5.748502 | 5.518055 | 6.312079 | 6.071687 | 5.850207 | 5.622559 | -0.0164  | 0.131    | 0.0089   | 0.001402 | 1.408125 | 13 |
| 7901_at | YPL124W | SPC29      | 5.666891 | 5.863312 | 5.549819 | 5.204686 | 5.447984 | 5.402351 | 4.759052 | 4.77542  | 4.844767 | 4.753777 | 4.904495 | 4.522732 | 5.441296 | 5.382255 | 4.989587 | 4.80949  | -0.133   | 0.19     | 0.000334 | 8.33E-05 | 1.961089 | 14 |
| 7902_at | YPL168W |            | 4.978948 | 4.785148 | 5.71349  | 5.40275  | 5.317122 | 4.602425 | 5.366047 | 5.137976 | 5.225033 | 5.537327 | 5.347523 | 5.67249  | 5.37744  | 5.150135 | 5.1005   | 5.337654 | 0.0456   | -0.0462  | 0.557    | 0.056033 | 1.20336  | 13 |
| 7903_at | YPL167C | REV3       | 5.61025  | 5.569943 | 6.513718 | 5.910738 | 5.933583 | 5.77776  | 6.155233 | 5.975304 | 6.19334  | 5.954535 | 6.175089 | 6.453622 | 5.811481 | 6.194014 | 5.851772 | 6.104248 | 0.0348   | -0.0527  | 0.472    | 0.048274 | 1.201381 | 13 |
| 7904_at | YPL166W | ATG29      | 3.34935  | 3.198313 | 4.060175 | 3.506453 | 3.339286 | 3.427714 | 3.600452 | 3.378308 | 3.720975 | 3.612242 | 3.443731 | 3.452966 | 3.165944 | 3.279933 | 3.428535 | 3.494928 | -0.0536  | -0.0244  | 0.383    | 0.040033 | 1.16505  | 13 |
| 7905_at | YPL165C | SET6       | 3.971847 | 3.675635 | 3.377308 | 3.668215 | 3.487447 | 4.251321 | 4.122143 | 4.294221 | 4.402287 | 4.334655 | 4.790891 | 4.29055  | 4.760685 | 4.481301 | 5.193773 | 4.31845  | 0.313    | -0.0249  | 0.00107  | 0.000225 | 2.293677 | 7  |
| 7906_at | YPL164C | MLH3       | 5.563521 | 6.069822 | 5.377955 | 6.069827 | 5.963765 | 6.326167 | 5.892143 | 6.13023  | 6.515551 | 6.172053 | 6.757831 | 6.382489 | 6.819599 | 7.181362 | 6.802038 | 6.364951 | 0.319    | -0.0155  | 0.000199 | 5.41E-05 | 2.331396 | 7  |
| 7907_at | YPL163C | SVS1       | 8.116266 | 8.074811 | 7.815901 | 7.700317 | 7.497519 | 8.212776 | 6.38189  | 5.996174 | 6.329317 | 5.759558 | 6.056565 | 5.983149 | 5.922009 | 6.744108 | 6.112438 | 6.314487 | -0.529   | 0.241    | 0.000798 | 0.000175 | 4.196489 | 18 |
| 7908_at | YPL162C |            | 5.616562 | 5.222704 | 3.932036 | 4.929751 | 3.31422  | 4.790492 | 4.872367 | 5.058091 | 5.673022 | 4.526279 | 5.393998 | 5.44543  | 4.586842 | 4.58246  | 4.548656 | 4.950193 | -0.0353  | -0.0684  | 0.774    | 0.075509 | 1.243526 | 13 |
| 7909_at | YPL161C | BEM4       | 6.0446   | 6.224671 | 5.294766 | 5.866383 | 5.052289 | 5.718956 | 4.822228 | 5.243641 | 5.587357 | 4.946744 | 5.045584 | 4.844495 | 4.367901 | 4.636434 | 4.502079 | 5.087992 | -0.36    | 0.0268   | 0.000503 | 0.000119 | 2.594746 | 18 |
| 7910_at | YPL160W | CDC60      | 8.512105 | 8.644087 | 8.144575 | 7.855808 | 7.8871   | 7.834399 | 6.671901 | 7.427106 | 7.615888 | 6.608351 | 6.81642  | 6.919742 | 5.868427 | 6.066686 | 5.785564 | 6.895074 | -0.649   | 0.0848   | 0.000191 | 5.22E-05 | 5.950821 | 16 |
| 7911_at | YPL159C | PET20      | 7.320693 | 7.33746  | 6.26856  | 7.647923 | 7.406681 | 7.457812 | 7.114125 | 8.255819 | 8.598149 | 8.191446 | 8.717392 | 8.814432 | 7.633758 | 7.774817 | 8.052873 | 8.249348 | 0.273    | -0.241   | 0.00673  | 0.001105 | 2.777645 | 9  |
| 7912_at | YPL158C |            | 6.52279  | 6.702051 | 6.646758 | 6.822122 | 6.452979 | 6.371644 | 6.329151 | 6.206982 | 6.286148 | 6.581234 | 6.589408 | 6.345322 | 8.377689 | 7.327269 | 7.093414 | 6.434704 | 0.237    | 0.189    | 0.000603 | 0.000138 | 3.277375 | 8  |
| 7913_at | YPL157W | TGS1       | 5.866607 | 5.961126 | 5.308003 | 5.839602 | 6.048852 | 5.345584 | 5.623352 | 5.444196 | 6.626482 | 5.482938 | 5.435685 | 4.869623 | 4.365323 | 4.23485  | 4.195164 | 5.436757 | -0.381   | -0.121   | 1.18E-05 | 5.42E-06 | 2.748084 | 15 |
| 7914_at | YPL156C | PRM4       | 8.385994 | 8.38556  | 8.184344 | 8.615944 | 8.062657 | 8.761967 | 9.988796 | 9.311572 | 8.905113 | 9.090706 | 9.277293 | 9.129416 | 9.534914 | 9.934923 | 9.924378 | 9.132712 | 0.373    | -0.0204  | 1.09E-06 | 9.04E-07 | 2.688411 | 7  |
| 7915_at | YPL155C | KIP2       | 6.629534 | 6.647813 | 5.876974 | 6.163023 | 6.035606 | 6.08756  | 6.012192 | 6.135663 | 6.094043 | 6.362601 | 5.96145  | 5.532348 | 8.171333 | 7.362893 | 6.84914  | 6.010273 | 0.247    | 0.253    | 0.000745 | 0.000165 | 2.743688 | 8  |
| 7916_at | YPL154C | PEP4       | 10.45319 | 10.74082 | 10.76302 | 11.10789 | 11.07261 | 11.31721 | 11.40405 | 11.20843 | 11.53367 | 11.149   | 11.30762 | 11.59181 | 11.54176 | 11.5308  | 11.682   | 11.40503 | 0.221    | -0.0767  | 0.000104 | 3.16E-05 | 1.798054 | 9  |
| 7917_at | YPL153C | RAD53      | 5.814968 | 5.883947 | 5.424239 | 5.754849 | 5.957208 | 5.560643 | 5.816078 | 5.815917 | 5.816241 | 6.497426 | 6.957813 | 5.91804  | 7.439458 | 7.273806 | 6.742927 | 5.933932 | 0.364    | 0.137    | 2.73E-05 | 1.06E-05 | 2.669894 | 8  |
| 7918_at | YPL152W | RRD2       | 4.938547 | 5.581892 | 5.396902 | 6.238226 | 5.979695 | 6.088857 | 6.352987 | 6.49614  | 6.400617 | 6.346871 | 6.854205 | 7.503421 | 6.846604 | 6.301785 | 6.546947 | 6.696216 | 0.269    | -0.257   | 0.000257 | 6.69E-05 | 2.873349 | 9  |
| 7919_at | YPL151C | PRP46      | 6.681768 | 6.696107 | 6.441812 | 6.55893  | 6.594813 | 6.43897  | 6.973852 | 7.072006 | 6.372841 | 7.074962 | 6.942367 | 6.556309 | 6.98351  | 7.092802 | 6.854946 | 6.778476 | 0.11     | 0.000381 | 0.0883   | 0.010779 | 1.330093 | 13 |
| 7920_at | YPL150W |            | 5.054317 | 5.769638 | 5.402705 | 5.721835 | 5.74534  | 5.566909 | 5.876623 | 5.674387 | 5.556538 | 6.666506 | 6.687781 | 5.493451 | 5.732841 | 5.968039 | 5.887441 | 5.679954 | 0.0639   | 0.0101   | 0.104    | 0.012457 | 1.184467 | 13 |
| 7921_at | YPL149W | ATG5       | 8.064954 | 8.021084 | 7.826739 | 8.124526 | 7.825036 | 7.906759 | 8.101886 | 8.032959 | 8.011886 | 8.136681 | 8.315852 | 8.699277 | 8.025361 | 7.972228 | 8.275806 | 8.204241 | 0.0552   | -0.0487  | 0.211    | 0.023446 | 1.259582 | 13 |
| 7922_at | YPL148C | PP2        | 6.121934 | 6.202148 | 6.031941 | 6.534139 | 6.363737 | 6.476644 | 6.529088 | 6.303813 | 6.243654 | 6.034712 | 6.319204 | 6.296138 | 5.010021 | 5.20245  | 5.056285 | 6.334713 | -0.268   | -0.199   | 6.86E-09 | 3.02E-08 | 2.512894 | 15 |
| 7923_at | YPL147W | PXA1       | 4.349523 | 4.397945 | 4.264601 | 4.601019 | 4.613921 | 4.210746 | 4.797085 | 4.909638 | 4.467198 | 4.973908 | 4.589821 | 5.167874 | 4.60224  | 4.516823 | 4.399489 | 4.785096 | 0.0693   | -0.103   | 0.0225   | 0.003176 | 1.435595 | 13 |
| 7924_at | YPL190C | NAB3       | 6.584234 | 6.466903 | 5.266435 | 6.043683 | 6.059071 | 5.774858 | 6.297069 | 5.756967 | 6.428976 | 6.372427 | 6.429339 | 5.831055 | 6.07429  | 6.250672 | 6.305359 | 6.132183 | 0.0434   | 0.00387  | 0.843    | 0.081412 | 1.12194  | 13 |
| 7925_at | YPL189W | GUP2       | 6.973918 | 7.096339 | 6.382509 | 6.449275 | 6.819086 | 6.039957 | 6.247484 | 5.905391 | 6.0538   | 6.151428 | 6.17733  | 6.084766 | 6.056117 | 6.139691 | 5.749093 | 6.077048 | -0.202   | 0.0878   | 0.00289  | 0.000527 | 1.711068 | 16 |
| 7926_at | YPL188W | POS5       | 6.246246 | 6.311746 | 5.338267 | 6.100068 | 6.200624 | 5.951526 | 6.440577 | 6.660939 | 6.485347 | 6.809003 | 6.805428 | 6.370884 | 6.647611 | 6.307132 | 5.903629 | 6.532382 | 0.112    | -0.117   | 0.0666   | 0.008395 | 1.589593 | 13 |
| 7927_at | YPL187W | MIF(ALPHA) | 7.253048 | 7.097722 | 6.957498 | 7.461037 | 7.470821 | 7.743005 | 7.525031 | 7.575995 | 7.592344 | 6.933034 | 7.308471 | 7.133702 | 6.51615  | 6.743423 | 6.477555 | 7.413276 | -0.171   | -0.153   | 4.92E-05 | 1.71E-05 | 1.908426 | 15 |
| 7928_at | YPL186C | UIP4       | 5.928259 | 5.962494 | 5.851745 | 6.831164 | 6.685142 | 6.61582  | 7.781611 | 6.787747 | 7.505401 | 7.701489 | 7.307188 | 7.171148 | 6.964257 | 7.098559 | 7.4963   | 7.955    | -0.278   | 3.84E-05 | 1.39E-05 | 3.14786  | 10       |    |
| 7929_at | YPL185W |            | 4.261618 | 4.350813 | 4.03908  | 4.187624 | 4.167453 | 4.460224 | 4.429601 | 4.589943 | 4.636514 | 4.210044 | 4.458803 | 4.093092 | 4.17429  | 4.299612 | 4.203582 | 4.377152 | -0.00921 | -0.0433  | 0.327    | 0.034756 | 1.122125 | 13 |
| 7930_at | YPL184C | MNR1       | 5.175493 | 5.450044 | 5.407674 | 5.205491 | 4.821841 | 5.106336 | 5.020278 | 5.359591 | 4.860945 | 4.742408 | 4.90066  | 5.47     |          |          |          |          |          |          |          |          |          |    |



|           |         |        |          |          |          |          |          |          |           |           |          |          |          |          |          |          |          |          |          |         |          |          |          |    |
|-----------|---------|--------|----------|----------|----------|----------|----------|----------|-----------|-----------|----------|----------|----------|----------|----------|----------|----------|----------|----------|---------|----------|----------|----------|----|
| 7962_s_at | YPL198W | RPL7B  | 11.55271 | 11.80884 | 11.98231 | 11.07955 | 11.00452 | 11.2827  | 10.25532  | 10.08822  | 10.24631 | 8.934562 | 9.139444 | 9.654389 | 8.52175  | 8.843967 | 8.977703 | 9.789843 | -0.841   | 0.145   | 1.57E-07 | 2.31E-07 | 9.301009 | 18 |
| 7963_at   | YPL197C |        | 4.639677 | 5.583836 | 4.303727 | 3.844941 | 3.976344 | 4.749239 | 3.981177  | 4.09262   | 4.035857 | 3.592379 | 4.065508 | 3.765987 | 3.795546 | 3.434904 | 4.183997 | 6.048072 | -0.194   | 0.167   | 0.0114   | 0.00174  | 2.04765  | 14 |
| 7964_at   | YPL196W | OXR1   | 7.091997 | 7.099607 | 6.951956 | 7.340728 | 6.915794 | 7.161794 | 6.788034  | 6.705645  | 7.160817 | 6.152747 | 6.619166 | 6.654542 | 6.502079 | 6.561527 | 6.541672 | 6.747152 | -0.175   | 0.018   | 0.0113   | 0.001724 | 1.589807 | 16 |
| 7965_at   | YPL195W | APL5   | 5.44805  | 6.111889 | 6.111905 | 5.705412 | 4.890339 | 5.90188  | 5.650619  | 5.111188  | 5.682711 | 5.756433 | 5.575186 | 5.691751 | 5.466726 | 5.624299 | 5.820867 | 5.517332 | -0.075   | 0.0641  | 0.468    | 0.047887 | 1.240405 | 13 |
| 7966_at   | YPL194W | DDC1   | 5.201531 | 5.185215 | 3.716082 | 4.742072 | 3.959689 | 4.655353 | 4.643847  | 4.837376  | 4.888348 | 4.343863 | 4.957436 | 4.655142 | 4.242842 | 4.54244  | 4.051131 | 4.630732 | -0.0887  | -0.0435 | 0.499    | 0.050723 | 1.295413 | 13 |
| 7967_at   | YPL193W | RSA1   | 5.985154 | 6.243529 | 6.215692 | 6.060714 | 5.523229 | 6.077278 | 5.416654  | 5.937553  | 6.104595 | 5.669317 | 5.925945 | 5.918087 | 5.742139 | 5.792082 | 5.629311 | 5.789644 | -0.0994  | 0.036   | 0.0969   | 0.011715 | 1.301634 | 13 |
| 7968_at   | YPL192C | PRM3   | 5.27726  | 5.217805 | 5.102274 | 5.391342 | 5.372264 | 5.441351 | 4.368085  | 5.380971  | 5.305961 | 5.556082 | 5.931574 | 5.980498 | 5.9916   | 6.170317 | 6.019756 | 5.486539 | 0.251    | 0.0397  | 0.00685  | 0.001122 | 1.945423 | 8  |
| 7969_at   | YPL191C |        | 3.912532 | 3.579599 | 3.001776 | 3.615396 | 3.764512 | 3.420505 | 3.252017  | 3.867151  | 3.834306 | 3.476113 | 3.702437 | 3.559321 | 3.705678 | 3.529264 | 3.306825 | 3.623183 | -0.00132 | -0.0317 | 0.765    | 0.074725 | 1.081245 | 13 |
| 7970_at   | YPL234C | TFP3   | 10.52847 | 10.35336 | 10.63111 | 10.3781  | 10.12968 | 10.29843 | 10.40149  | 10.04591  | 9.98413  | 9.832291 | 9.815622 | 10.45933 | 9.859965 | 9.402286 | 9.585243 | 10.06476 | -0.295   | -0.0436 | 0.000152 | 4.32E-05 | 2.186668 | 16 |
| 7971_at   | YPL233W | NSL1   | 5.425952 | 4.772063 | 5.640671 | 4.895165 | 5.047232 | 4.53795  | 4.64445   | 4.59729   | 4.302241 | 4.369356 | 4.463932 | 4.045812 | 3.873489 | 3.836171 | 3.510223 | 4.383348 | -0.396   | 0.0351  | 3.22E-05 | 1.20E-05 | 2.858354 | 16 |
| 7972_at   | YPL232W | SSO1   | 8.161538 | 8.006046 | 8.358663 | 8.363761 | 8.172183 | 7.975319 | 8.37515   | 8.186471  | 8.079465 | 8.301601 | 8.157001 | 8.325995 | 7.800185 | 8.257674 | 8.153395 | 8.224962 | -0.018   | -0.0292 | 0.477    | 0.048709 | 1.103093 | 13 |
| 7973_at   | YPL231W | FAS2   | 10.4611  | 10.46871 | 10.39465 | 10.84436 | 10.70325 | 10.95887 | 10.84798  | 10.85915  | 11.09015 | 11.26175 | 11.34613 | 11.59394 | 11.4843  | 11.50221 | 11.75488 | 11.19706 | 0.312    | -0.0522 | 3.27E-07 | 3.76E-07 | 2.285894 | 7  |
| 7974_at   | YPL230W |        | 5.640282 | 5.068015 | 6.133387 | 5.845515 | 5.564149 | 5.70839  | 5.845501  | 5.850592  | 6.363619 | 6.767809 | 6.627463 | 7.144906 | 8.679913 | 7.757629 | 8.87119  | 6.401743 | 0.761    | 0.167   | 7.78E-07 | 6.95E-07 | 7.51214  | 6  |
| 7975_at   | YPL229W |        | 7.173666 | 6.88351  | 6.756221 | 7.309187 | 7.302479 | 7.333019 | 7.627191  | 7.347617  | 7.898867 | 7.599639 | 7.929869 | 7.747455 | 7.656165 | 7.487269 | 8.026868 | 7.693429 | 0.211    | -0.101  | 0.000379 | 9.29E-05 | 1.794252 | 9  |
| 7976_at   | YPL228W | CET1   | 3.757386 | 3.88558  | 3.188343 | 3.639309 | 3.436197 | 3.530455 | 3.270451  | 3.450108  | 3.466839 | 3.149815 | 3.512677 | 3.461398 | 3.276833 | 3.316978 | 3.183939 | 3.394324 | -0.0922  | 0.1019  | 0.00864  | 0.010564 | 1.276809 | 13 |
| 7977_at   | YPL227C | ALG5   | 8.156911 | 8.135912 | 7.427496 | 7.67073  | 7.534957 | 7.399984 | 7.529126  | 7.387665  | 7.198586 | 7.669173 | 7.622627 | 7.060194 | 6.432172 | 7.07467  | 5.992535 | 7.361908 | -0.33    | -0.0469 | 0.00176  | 0.000346 | 2.396641 | 16 |
| 7978_at   | YPL226W | NEW1   | 10.0673  | 10.2004  | 9.324406 | 8.747463 | 8.204111 | 8.825839 | 8.610707  | 8.684186  | 8.634168 | 8.185404 | 8.626263 | 8.034065 | 7.869319 | 7.894939 | 7.684198 | 8.217102 | -0.507   | 0.165   | 0.000003 | 1.91E-06 | 3.830658 | 18 |
| 7979_at   | YPL225W |        | 8.758569 | 8.029702 | 8.703385 | 9.080209 | 7.562778 | 8.899417 | 8.087279  | 8.660194  | 8.942771 | 8.252902 | 8.81846  | 8.852208 | 8.507493 | 8.811943 | 8.403386 | 8.596049 | -0.0306  | 0.028   | 0.875    | 0.084199 | 1.124073 | 13 |
| 7980_at   | YPL224C | MMT2   | 7.354572 | 7.019154 | 5.822051 | 6.761133 | 6.988096 | 6.359882 | 6.166014  | 6.662411  | 7.090845 | 7.277181 | 8.161890 | 8.959783 | 6.685471 | 6.459677 | 6.878617 | 8.678617 | 0.0255   | -0.0479 | 0.793    | 0.077191 | 1.170025 | 13 |
| 7981_at   | YPL223C | GRE1   | 7.330011 | 6.826939 | 7.888581 | 8.964855 | 8.552921 | 6.668801 | 8.973136  | 10.007414 | 10.01353 | 8.961485 | 8.085856 | 9.304888 | 7.981987 | 8.422558 | 8.714998 | 9.513779 | 0.193    | -0.446  | 0.000986 | 0.00021  | 4.017784 | 10 |
| 7982_at   | YPL222W | FPM40  | 6.904385 | 6.838756 | 6.663672 | 7.923304 | 7.850855 | 7.844173 | 8.349322  | 7.973728  | 8.548595 | 8.705445 | 8.302863 | 8.304786 | 8.170419 | 8.202134 | 8.014977 | 8.438221 | 0.337    | -0.266  | 2.71E-07 | 3.26E-07 | 3.272567 | 10 |
| 7983_at   | YPL221W | FLC1   | 9.225488 | 9.043886 | 9.430979 | 9.419469 | 9.60977  | 9.738187 | 9.872502  | 9.530409  | 9.899509 | 10.28788 | 10.11637 | 9.993828 | 11.13463 | 10.79087 | 10.81292 | 9.976832 | 0.436    | 0.0263  | 7.03E-08 | 1.35E-07 | 3.176055 | 7  |
| 7984_s_at | YPL220W | RPL1A  | 12.33259 | 12.44481 | 12.62964 | 12.14516 | 12.23644 | 12.47073 | 11.93887  | 11.99199  | 12.10171 | 11.52043 | 11.26589 | 11.54003 | 10.72836 | 10.91302 | 10.76416 | 11.74832 | -0.46    | -0.0272 | 1.72E-08 | 5.34E-08 | 3.382353 | 16 |
| 7985_at   | YPL219W | PCL8   | 6.070806 | 5.951005 | 5.330411 | 6.356081 | 6.07382  | 6.036626 | 6.063697  | 6.29832   | 6.096075 | 5.488301 | 5.90924  | 6.046382 | 6.049491 | 5.584905 | 5.714751 | 6.048072 | -0.0368  | -0.0682 | 0.276    | 0.029801 | 1.246225 | 13 |
| 7986_at   | YPL218W | SAR1   | 9.91043  | 10.18075 | 10.62355 | 11.06042 | 10.81339 | 10.97126 | 10.3566   | 10.57728  | 10.66958 | 10.83787 | 11.02581 | 11.41643 | 8.920037 | 10.00247 | 10.38617 | 10.94308 | -0.0256  | -0.214  | 0.00497  | 0.00085  | 1.723055 | 12 |
| 7987_at   | YPL217C | BMS1   | 6.5226   | 6.739397 | 6.769334 | 6.184214 | 6.146239 | 6.02552  | 6.431763  | 6.740181  | 6.278719 | 6.629525 | 6.183917 | 6.220938 | 6.179109 | 6.446408 | 6.43547  | 6.286538 | -0.0106  | 0.0859  | 0.122    | 0.01441  | 1.249704 | 13 |
| 7988_at   | YPL216W |        | 2.880646 | 3.034051 | 2.793636 | 3.079235 | 2.969704 | 2.808966 | 3.282343  | 3.223981  | 2.973301 | 3.06611  | 3.167483 | 3.279939 | 2.987631 | 3.211752 | 2.904141 | 3.135242 | 0.012    | -0.0664 | 0.0337   | 0.004564 | 1.197226 | 13 |
| 7989_at   | YPL215W | CBP3   | 7.561514 | 7.78215  | 7.620532 | 8.55275  | 8.531006 | 8.358322 | 8.660008  | 8.447979  | 8.670634 | 8.269755 | 8.198873 | 8.935172 | 7.869246 | 7.664543 | 7.965171 | 8.622039 | 0.0073   | -0.25   | 4.98E-05 | 1.72E-05 | 1.841023 | 12 |
| 7990_at   | YPL214C | TH16   | 8.083649 | 7.590041 | 7.303748 | 8.193669 | 8.25807  | 8.053726 | 8.348269  | 7.952554  | 7.980633 | 8.134662 | 8.17934  | 8.085549 | 7.765671 | 7.874343 | 8.03079  | 8.192185 | 0.0458   | -0.112  | 0.019    | 0.002744 | 1.409898 | 12 |
| 7991_at   | YPL213W | LEA1   | 5.649738 | 6.0168   | 6.241505 | 6.427056 | 6.149378 | 6.059935 | 6.226674  | 6.320488  | 5.979478 | 6.322916 | 6.45354  | 6.518269 | 6.437997 | 6.27344  | 6.525385 | 6.335235 | 0.122    | -0.0395 | 0.0141   | 0.002102 | 1.382225 | 13 |
| 7992_at   | YPL212C | PUS1   | 8.476239 | 8.898168 | 9.031598 | 8.756756 | 8.729289 | 8.669298 | 9.012188  | 8.680613  | 8.902567 | 9.108952 | 8.972605 | 9.344212 | 8.313298 | 8.678213 | 8.790966 | 8.949267 | -0.0144  | -0.0739 | 0.2      | 0.022371 | 1.214629 | 13 |
| 7993_at   | YPL256C | CLN2   | 7.050694 | 7.130362 | 6.380266 | 7.092393 | 7.302462 | 7.273039 | 5.212446  | 6.657864  | 6.193382 | 4.711068 | 5.01398  | 5.026353 | 5.009544 | 5.698119 | 4.793874 | 5.198086 | -0.589   | 0.116   | 0.00271  | 0.0005   | 4.766615 | 18 |
| 7994_at   | YPL255W | BBP1   | 4.055692 | 3.808159 | 2.990426 | 3.195414 | 3.374666 | 3.339595 | 3.146361  | 3.128842  | 3.032982 | 3.399736 | 3.309354 | 2.882899 | 3.762366 | 3.421271 | 3.271873 | 3.138016 | -0.0297  | 0.114   | 0.0856   | 0.01048  | 1.380728 | 13 |
| 7995_at   | YPL254W | HFI1   | 5.255551 | 5.687826 | 5.154345 | 5.23157  | 5.09857  | 5.20969  | 4.857476  | 4.845578  | 5.013369 | 5.014339 | 4.946793 | 5.016643 | 4.977408 | 5.04386  | 5.116341 | 5.062873 | -0.118   | 0.0881  | 0.00283  | 0.000519 | 1.957922 | 14 |
| 7996_at   | YPL253C | VIK1   | 3.887149 | 3.858978 | 3.400791 | 3.612959 | 3.796559 | 3.585166 | 3.154298  | 3.509036  | 3.410306 | 3.247302 | 3.309355 | 3.31763  | 3.11204  | 3.443534 | 2.823675 | 3.365566 | -0.163   | 0.0186  | 0.00779  | 0.001252 | 1.539604 | 16 |
| 7997_at   | YPL252C | YAH1   | 9.222262 | 9.664921 | 9.646841 | 10.10254 | 10.18104 | 10.10347 | 9.924436  | 9.782142  | 9.907261 | 9.405429 | 9.523345 | 9.533206 | 8.790058 | 9.046813 | 8.595422 | 9.773765 | -0.277   | -0.13   | 4.1E-06  | 2.41E-06 | 2.220887 | 15 |
| 7998_at   | YPL251W |        | 6.273047 | 6.120461 | 5.951124 | 5.865289 | 6.052105 | 6.236244 | 6.126451  | 6.146867  | 6.132929 | 6.16944  | 6.045873 | 6.682284 | 6.767764 | 6.773349 | 6.423609 | 6.047503 | 0.119    | 0.094   | 0.00281  | 0.000515 | 1.524292 | 13 |
| 7999_at   | YPL250C | ICY2   | 7.942676 | 7.459743 | 7.865312 | 8.399713 | 8.088457 | 8.513426 | 8.018706  | 8.229604  | 8.336907 | 8.48369  | 8.609948 | 8.540625 | 9.951877 | 8.989957 | 9.397115 | 8.486023 | 0.486    | 0.0782  | 1.14E-06 | 9.34E-07 | 3.628077 | 7  |
| 8000_i_at | YPL249C | RPL36B | 9.988005 | 10.4441  | 11.17613 | 9.968681 | 9.609836 | 10.31343 | 10.807717 | 8.822743  | 9.008351 | 8.05929  | 7.84452  | 8.275151 | 7.045631 | 7.249653 | 7.684662 | 8.554172 | -0.875   | 0.107   | 5.96E-07 | 8.3E-07  | 10.18284 | 20 |
| 8001_at   | YPL249C | GYP5   | 4.190918 | 4.422398 | 4.062358 | 4.190344 | 4.204192 | 4.297709 | 4.552549  | 4.52298   | 4.132691 | 4.207986 | 4.135176 | 4.254782 | 4.360296 | 4.655148 | 4.211797 | 4.282731 | 0.0356   | 0.00961 | 0.56     | 0.056337 | 1.098843 | 13 |
| 8002_at   | YPL248C | GAL4   | 5.498088 | 5.612857 | 4.76945  | 6.021446 | 5.89169  | 5.969397 | 6.527204  | 6.382633  | 6.169491 | 6.371499 |          |          |          |          |          |          |          |         |          |          |          |    |

|           |                |          |          |          |          |          |          |          |          |          |          |          |          |          |          |          |          |         |          |          |          |          |    |
|-----------|----------------|----------|----------|----------|----------|----------|----------|----------|----------|----------|----------|----------|----------|----------|----------|----------|----------|---------|----------|----------|----------|----------|----|
| 8037_at   | YPL258C TH121  | 7.593975 | 7.062769 | 6.475251 | 7.435872 | 6.675192 | 7.703856 | 6.746855 | 6.992276 | 7.437311 | 7.135954 | 7.417986 | 7.614103 | 7.34193  | 7.665615 | 7.330125 | 7.27967  | 0.109   | -0.00803 | 0.389    | 0.04055  | 1.334949 | 13 |
| 8038_at   | YPL257W        | 4.317802 | 4.220752 | 3.851559 | 4.203291 | 4.241454 | 4.287684 | 3.715499 | 4.266962 | 4.592783 | 4.408909 | 4.516828 | 4.472883 | 4.515809 | 3.848495 | 4.439582 | 4.343974 | 0.095   | -0.0158  | 0.138    | 0.016005 | 1.286229 | 13 |
| 8138_at   | YOR384W FRE5   | 2.90674  | 2.803848 | 2.48378  | 2.73346  | 2.573773 | 2.760979 | 2.550111 | 2.670796 | 2.87732  | 2.713896 | 2.826378 | 2.534878 | 2.88332  | 2.746635 | 2.672164 | 2.690503 | 0.00887 | 0.0161   | 0.736    | 0.072121 | 1.053645 | 13 |
| 8139_at   | YOR385W        | 8.59205  | 7.377773 | 7.069358 | 7.073102 | 7.981333 | 6.760979 | 5.881678 | 7.103887 | 7.161694 | 7.068118 | 7.028445 | 7.168215 | 6.532328 | 6.929576 | 6.027587 | 6.906134 | -0.193  | 0.0954   | 0.208    | 0.032129 | 1.717555 | 16 |
| 8140_at   | YOR386W PHR1   | 5.692807 | 5.326465 | 4.333193 | 5.769551 | 5.842665 | 5.808997 | 5.813175 | 5.804542 | 6.692315 | 5.373387 | 5.477805 | 5.380801 | 6.46576  | 6.682558 | 4.516238 | 5.765303 | -0.171  | -0.242   | 0.00494  | 0.000845 | 2.340632 | 15 |
| 8141_at   | YOR387C        | 3.181688 | 3.031797 | 2.820508 | 3.030339 | 2.943411 | 3.405896 | 3.020001 | 2.884713 | 2.935378 | 3.081876 | 2.976187 | 3.021423 | 3.423353 | 3.372161 | 3.36888  | 3.035162 | 0.0841  | 0.048    | 0.0134   | 0.002001 | 1.295122 | 13 |
| 8142_s_at | YOR388C FDH1   | 4.538316 | 4.55244  | 4.195385 | 4.879076 | 4.929172 | 4.790252 | 5.203081 | 5.092279 | 4.982641 | 6.59333  | 5.902055 | 5.838627 | 6.272319 | 6.394391 | 5.85486  | 5.597582 | 0.512   | -0.0872  | 1.29E-05 | 5.79E-06 | 3.88545  | 7  |
| 8143_at   | YOR389W        | 6.143893 | 6.299918 | 5.151389 | 6.274279 | 6.231191 | 6.063563 | 6.977968 | 6.650954 | 6.653117 | 7.394277 | 7.111353 | 7.298869 | 6.706029 | 6.44497  | 6.681313 | 6.943812 | 0.251   | -0.202   | 0.00229  | 0.000432 | 2.441518 | 9  |
| 8144_g_at | YOR389W        | 8.011077 | 7.636353 | 7.525416 | 8.505128 | 8.459264 | 8.292069 | 9.099632 | 8.971092 | 8.770202 | 9.474918 | 9.341552 | 9.215554 | 6.648573 | 8.817096 | 8.822904 | 9.139776 | 0.302   | -0.251   | 1.65E-06 | 1.23E-06 | 2.981772 | 9  |
| 8145_s_at | YOR390W        | 5.979814 | 5.378464 | 3.894386 | 5.349865 | 4.969961 | 5.225343 | 5.198928 | 5.47475  | 5.419017 | 5.622289 | 5.613197 | 6.15075  | 8.410977 | 7.163052 | 7.444449 | 5.596553 | 0.675   | 0.207    | 4.45E-05 | 1.57E-05 | 5.987939 | 6  |
| 8146_at   | YOR392W        | 4.970393 | 4.708289 | 3.970513 | 5.041735 | 4.935045 | 4.84859  | 5.292333 | 5.720283 | 5.348596 | 5.719369 | 5.542415 | 5.242566 | 5.597108 | 5.0251   | 4.949441 | 5.447679 | 0.18    | -0.162   | 0.00659  | 0.001086 | 1.977713 | 9  |
| 8147_s_at | YOR394W PAU21  | 4.464062 | 4.528427 | 4.289219 | 5.060032 | 4.749275 | 4.484568 | 6.010708 | 5.551279 | 5.503449 | 6.199266 | 5.802778 | 6.147774 | 7.187138 | 6.274269 | 6.634101 | 5.776332 | 0.62    | -0.0664  | 8.98E-06 | 4.37E-06 | 5.174023 | 6  |
| 8148_at   | YOL013W-A      | 4.215133 | 4.156924 | 4.157415 | 4.34048  | 4.115854 | 4.449811 | 4.1393   | 4.163788 | 4.108374 | 4.142448 | 4.227285 | 3.939421 | 4.498717 | 4.440907 | 4.369049 | 4.171073 | 0.0468  | 0.0405   | 0.0576   | 0.007365 | 1.190169 | 13 |
| 8149_at   | YOL038c-a      | 7.633499 | 7.574664 | 7.404046 | 7.654472 | 7.59132  | 7.408331 | 6.958977 | 7.001009 | 6.691043 | 6.409241 | 6.467102 | 6.001428 | 6.216939 | 6.666027 | 5.982303 | 6.712231 | -0.389  | 0.0655   | 0.000342 | 8.50E-05 | 2.80347  | 16 |
| 8150_s_at | YOR069W VPS5   | 3.661614 | 4.08998  | 3.597599 | 3.875271 | 3.989827 | 3.63555  | 4.54529  | 3.96119  | 3.564778 | 4.170871 | 3.695059 | 3.612275 | 3.650575 | 3.658909 | 3.518556 | 3.905282 | -0.0486 | -0.0582  | 0.31     | 0.033074 | 1.232429 | 13 |
| 8151_s_at | YOR074C CDC21  | 6.159005 | 6.730439 | 6.553847 | 6.420591 | 6.427226 | 6.373994 | 5.922014 | 5.794936 | 5.751928 | 5.852396 | 5.508026 | 5.36673  | 4.581333 | 4.821693 | 4.658384 | 5.769495 | -0.481  | -0.046   | 8.71E-07 | 7.63E-07 | 3.577023 | 16 |
| 8152_f_at | YOR074C CDC21  | 3.126048 | 3.143288 | 3.176497 | 2.908102 | 2.8218   | 2.729524 | 3.19624  | 2.874383 | 2.639439 | 2.453139 | 2.765730 | 2.420893 | 2.251344 | 2.348924 | 2.434395 | 2.627276 | -0.213  | 0.0193   | 9.79E-05 | 3.00E-05 | 1.570711 | 16 |
| 8161_at   | YOR362C PRE10  | 9.65774  | 9.569072 | 10.10898 | 9.647088 | 9.635629 | 9.532423 | 9.829581 | 9.750862 | 9.544913 | 9.808844 | 9.356855 | 9.674749 | 8.843625 | 8.781566 | 9.095609 | 9.605888 | -0.206  | -0.0763  | 0.00027  | 6.97E-05 | 1.739315 | 16 |
| 8162_at   | YOR363C PIP2   | 5.429028 | 5.641312 | 4.707321 | 5.780921 | 5.647506 | 5.387758 | 6.328955 | 6.322751 | 6.363033 | 6.06069  | 6.33322  | 6.826614 | 6.643501 | 5.732886 | 5.953939 | 6.111073 | 0.229   | -0.152   | 0.00758  | 0.001223 | 2.087964 | 9  |
| 8163_at   | YOR364W        | 3.843808 | 3.623395 | 3.624581 | 3.831957 | 3.842202 | 4.224768 | 4.015026 | 4.141737 | 3.856464 | 3.987642 | 4.095803 | 3.953983 | 4.150441 | 3.932444 | 4.047346 | 4.041583 | 0.0808  | -0.0457  | 0.0164   | 0.002402 | 1.271893 | 13 |
| 8164_at   | YOR365C        | 2.762873 | 2.985912 | 3.245063 | 3.162644 | 3.129728 | 3.269633 | 3.834572 | 3.480662 | 3.011716 | 3.473383 | 3.396245 | 3.500496 | 3.313887 | 3.80961  | 3.425659 | 3.44777  | 0.123   | -0.0631  | 0.0255   | 0.003556 | 1.420662 | 13 |
| 8165_at   | YOR366W        | 3.056814 | 2.811736 | 3.70148  | 3.095763 | 3.056944 | 3.032429 | 3.563256 | 3.459918 | 3.351564 | 3.741145 | 3.50326  | 4.149417 | 3.757879 | 3.552097 | 3.360736 | 3.532803 | 0.143   | -0.0511  | 0.0967   | 0.011697 | 1.460725 | 13 |
| 8166_at   | YOR367W SCP1   | 5.794009 | 6.024124 | 6.952656 | 6.509023 | 6.468666 | 6.507539 | 6.839651 | 6.496206 | 6.369806 | 7.029303 | 6.805813 | 7.218233 | 6.592458 | 6.685613 | 6.603059 | 6.793504 | 0.127   | -0.101   | 0.0566   | 0.007249 | 1.564418 | 13 |
| 8167_at   | YOR368W RAD17  | 4.565137 | 4.703601 | 5.226971 | 4.668682 | 4.996847 | 4.335637 | 5.132719 | 4.956737 | 4.400129 | 4.971    | 4.716657 | 4.430628 | 5.415989 | 4.806834 | 4.714813 | 4.758502 | 0.042   | 0.0386   | 0.577    | 0.057888 | 1.174982 | 13 |
| 8168_at   | YOR369C RPS12  | 12.10682 | 12.13006 | 12.31274 | 11.80824 | 11.96    | 12.01443 | 11.59148 | 11.53089 | 11.26384 | 10.84022 | 10.80799 | 10.87293 | 9.975534 | 10.58173 | 10.15442 | 11.1949  | -0.541  | 0.00982  | 1.18E-07 | 1.91E-07 | 4.193069 | 18 |
| 8169_at   | YOR370C MRS6   | 8.193818 | 8.466659 | 8.567184 | 8.487851 | 8.610125 | 8.406075 | 8.789909 | 8.667149 | 8.243063 | 8.730737 | 8.436135 | 8.979608 | 8.531873 | 8.845485 | 8.550097 | 8.64393  | 0.0723  | -0.0337  | 0.186    | 0.020907 | 1.288847 | 13 |
| 8170_at   | YOR372C GDB1   | 5.189852 | 4.693508 | 5.886543 | 5.335622 | 5.339328 | 4.691943 | 5.953688 | 5.752878 | 5.043729 | 6.075107 | 5.468396 | 5.634903 | 6.682902 | 5.044586 | 5.018863 | 5.537914 | 0.0203  | -0.0738  | 0.583    | 0.058364 | 1.235179 | 13 |
| 8171_at   | YOR371C PNP1   | 6.105755 | 5.939802 | 6.318876 | 5.931265 | 6.05644  | 5.888641 | 5.612723 | 5.414365 | 5.188847 | 5.707841 | 5.440127 | 5.573019 | 6.164233 | 5.652753 | 5.95725  | 5.455208 | -0.0249 | 0.153    | 0.015    | 0.002214 | 1.506275 | 13 |
| 8172_at   | YOR373W NUD1   | 5.779267 | 5.522483 | 6.314555 | 5.76592  | 5.655292 | 5.88617  | 5.551662 | 5.404    | 5.310899 | 5.251373 | 5.220781 | 5.471151 | 5.302021 | 5.437147 | 5.224977 | 5.402187 | 0.0617  | 0.0618   | 0.00892  | 0.001405 | 1.556852 | 16 |
| 8173_at   | YOR374W ALD1   | 7.17796  | 7.420703 | 7.166359 | 8.937272 | 8.695972 | 8.41731  | 9.441921 | 9.575207 | 9.068672 | 7.964989 | 8.01587  | 9.041597 | 7.705069 | 7.695647 | 8.065714 | 8.976217 | 0.0597  | -0.387   | 0.00267  | 0.000493 | 2.605887 | 11 |
| 8174_at   | YOR375C GDH1   | 11.00783 | 11.18109 | 11.54986 | 11.56117 | 11.46913 | 11.46976 | 11.19493 | 11.0708  | 11.64393 | 10.71807 | 10.50539 | 10.8412  | 9.850301 | 9.219808 | 9.912097 | 11.0629  | -0.447  | -0.162   | 2.97E-06 | 1.90E-06 | 3.295147 | 17 |
| 8175_at   | YOR376W        | 4.995396 | 4.871923 | 5.756917 | 4.866722 | 4.8154   | 4.895629 | 4.916414 | 4.724171 | 4.78462  | 4.679553 | 4.590272 | 4.498582 | 4.489725 | 4.542053 | 4.702544 | 4.728406 | -0.175  | 0.0418   | 0.00362  | 0.000643 | 1.588551 | 16 |
| 8176_at   | YOR377W ATF1   | 8.351075 | 8.072324 | 7.869401 | 7.997453 | 7.918173 | 8.013513 | 8.097272 | 7.884284 | 8.084525 | 7.329052 | 7.423675 | 7.943288 | 6.662622 | 7.014654 | 7.195156 | 7.772583 | -0.307  | -0.0669  | 2.69E-05 | 1.04E-05 | 2.575862 | 16 |
| 8177_at   | YOR378W        | 5.095188 | 5.033239 | 5.946685 | 5.251746 | 5.003896 | 4.920189 | 4.685028 | 5.129667 | 4.837756 | 6.286397 | 5.667237 | 5.730523 | 6.726565 | 6.874426 | 4.754067 | 5.318156 | 0.59    | 0.307    | 1.08E-06 | 9.02E-07 | 5.294364 | 5  |
| 8178_at   | YOR379C        | 3.922523 | 3.802275 | 4.795652 | 3.967803 | 4.018528 | 3.971837 | 3.52973  | 3.790888 | 3.976363 | 4.004879 | 4.018467 | 3.743996 | 4.274055 | 4.347158 | 4.537502 | 3.854758 | 0.0544  | 0.118    | 0.0328   | 0.004448 | 1.439159 | 13 |
| 8179_at   | YOR380W RDR1   | 6.67818  | 6.601107 | 6.91861  | 7.052636 | 7.70989  | 7.362917 | 7.301375 | 7.23354  | 7.764654 | 7.126277 | 7.939485 | 8.178566 | 6.849853 | 7.580576 | 7.37957  | 7.561393 | 0.172   | -0.158   | 0.0149   | 0.002206 | 1.935832 | 9  |
| 8180_at   | YOR381W FRE3   | 4.443623 | 4.088963 | 3.757727 | 4.696933 | 4.462201 | 4.89932  | 5.01283  | 4.612694 | 5.106124 | 5.120476 | 5.390459 | 5.621656 | 5.056989 | 5.056836 | 5.050771 | 5.172771 | 0.273   | -0.166   | 7.45E-05 | 2.40E-05 | 2.319156 | 9  |
| 8181_at   | YOR382W FIT2   | 4.908748 | 4.812913 | 4.706979 | 5.354414 | 4.816338 | 5.882105 | 5.144913 | 5.266938 | 5.493832 | 5.062567 | 5.544524 | 5.751523 | 5.458084 | 5.763174 | 5.190039 | 5.458076 | 0.159   | -0.0846  | 0.0363   | 0.00487  | 1.583686 | 16 |
| 8182_at   | YOR383C FIT3   | 7.870528 | 7.52524  | 7.314416 | 7.698868 | 7.005191 | 8.485312 | 8.099195 | 7.843958 | 8.168543 | 8.001879 | 8.499032 | 8.618233 | 8.02166  | 8.380116 | 7.831414 | 8.11307  | 0.161   | -0.0971  | 0.0671   | 0.008444 | 1.639349 | 9  |
| 8183_at   | YOR339C UBC11  | 3.758933 | 3.618102 | 5.345794 | 3.621328 | 3.922973 | 3.454249 | 4.349548 | 3.847529 | 3.739711 | 4.021287 | 3.860292 | 3.642925 | 3.461303 | 3.509759 | 3.686915 | 3.778481 | -0.148  | 0.0261   | 0.31     | 0.033098 | 1.480842 | 16 |
| 8184_at   | YOR340C RPA43  | 6.857262 | 6.961768 | 7.545214 | 6.137861 | 6.409783 | 6.563718 | 6.106944 | 5.842    | 5.318251 | 5.892093 | 4.96794  | 4.58223  | 4.444341 | 4.437343 | 4.124833 | 5.353285 | -0.717  | 0.102    | 4.19E-06 | 2.45E-06 | 6.694368 | 18 |
| 8185_at   | YOR341W RPA190 | 8.541192 | 8.715532 | 8.518663 | 7.865504 |          |          |          |          |          |          |          |          |          |          |          |          |         |          |          |          |          |    |

|           |               |          |          |          |          |          |          |          |          |           |           |          |          |          |          |          |          |           |          |          |          |          |    |
|-----------|---------------|----------|----------|----------|----------|----------|----------|----------|----------|-----------|-----------|----------|----------|----------|----------|----------|----------|-----------|----------|----------|----------|----------|----|
| 8216_at   | YOR326W MYO2  | 8.137633 | 8.620898 | 7.922803 | 7.886094 | 7.961862 | 8.140335 | 8.150375 | 7.900143 | 7.899854  | 8.035214  | 8.195583 | 8.437833 | 8.185974 | 8.327846 | 8.518716 | 8.066327 | 0.0523    | 0.0576   | 0.144    | 0.016709 | 1.249566 | 13 |
| 8217_at   | YOR327C SNC2  | 9.131132 | 9.116793 | 9.355633 | 9.222382 | 9.02183  | 9.159344 | 8.783725 | 9.203339 | 8.908877  | 9.452199  | 9.5823   | 9.605233 | 10.36423 | 10.22523 | 10.14547 | 9.270077 | 0.291     | 0.123    | 1.5E-06  | 1.15E-06 | 2.24959  | 8  |
| 8218_at   | YOR328W PDR10 | 7.397164 | 7.288588 | 6.692329 | 7.527253 | 7.624333 | 7.555049 | 8.757978 | 7.814246 | 8.087176  | 8.203989  | 8.332306 | 8.1611   | 7.899946 | 8.101827 | 8.328157 | 8.073405 | 0.275     | -0.128   | 4.28E-05 | 1.52E-05 | 2.12432  | 9  |
| 8219_at   | YOR329C SC5D5 | 5.958811 | 5.950969 | 5.521909 | 5.959968 | 5.252579 | 5.475316 | 6.371173 | 6.146638 | 5.857912  | 6.218216  | 6.195309 | 6.049981 | 5.736205 | 5.990638 | 5.786166 | 6.072782 | 0.0297    | -0.0726  | 0.173    | 0.019601 | 1.250336 | 13 |
| 8220_at   | YOR330C MIP1  | 3.71125  | 4.070131 | 3.736559 | 3.858048 | 3.749262 | 3.665662 | 4.076252 | 3.7733   | 3.562602  | 4.148449  | 3.817543 | 4.076708 | 4.957652 | 4.560672 | 4.764943 | 3.897782 | 0.242     | 0.11     | 0.000012 | 5.50E-06 | 1.989409 | 8  |
| 8221_at   | YOR331C       | 5.861182 | 6.0368   | 5.431896 | 4.976326 | 5.564519 | 5.254002 | 5.960456 | 5.928602 | 5.831617  | 5.627437  | 5.579202 | 5.804132 | 5.369796 | 5.927358 | 5.313882 | 5.500398 | -0.0559   | 0.0369   | 0.646    | 0.064097 | 1.19629  | 13 |
| 8222_at   | YOR332W VMA4  | 10.98731 | 11.03404 | 11.35183 | 11.15456 | 11.11912 | 11.14156 | 11.30997 | 11.10832 | 11.05549  | 11.33151  | 11.11557 | 11.22723 | 10.91793 | 11.22853 | 11.13339 | 11.18561 | -0.000425 | -0.0219  | 0.594    | 0.059384 | 1.054861 | 13 |
| 8223_at   | YOR333C       | 3.964102 | 4.106943 | 3.643811 | 3.686454 | 3.957707 | 3.985285 | 3.763295 | 4.047521 | 3.655991  | 4.742233  | 4.04371  | 3.77349  | 5.846234 | 5.428358 | 6.001505 | 4.021197 | 0.398     | 0.182    | 0.000364 | 8.96E-05 | 3.117048 | 8  |
| 8224_at   | YOR334W MRS2  | 5.668643 | 5.808641 | 5.637161 | 5.760394 | 5.839155 | 5.800216 | 5.912865 | 5.740812 | 5.781353  | 5.924804  | 5.914202 | 5.851902 | 7.555982 | 6.869715 | 6.85366  | 5.88653  | 0.336     | 0.143    | 1.95E-06 | 1.39E-06 | 2.555845 | 8  |
| 8225_at   | YOR335C ALA1  | 8.842124 | 9.154395 | 9.156544 | 8.643407 | 8.754945 | 8.731946 | 8.83477  | 8.809441 | 8.570734  | 8.860918  | 8.901535 | 8.807523 | 9.343444 | 9.20646  | 9.125802 | 8.747364 | 0.059     | 0.105    | 0.000224 | 5.95E-05 | 1.409225 | 13 |
| 8226_at   | YOR336W KRE5  | 6.744357 | 7.037663 | 6.980096 | 6.976347 | 6.949647 | 6.962607 | 7.432379 | 7.017945 | 7.125605  | 6.937356  | 7.366514 | 7.65305  | 6.845505 | 7.426306 | 7.059759 | 7.218087 | 0.0692    | -0.0588  | 0.172    | 0.019547 | 1.28886  | 13 |
| 8227_at   | YOR337W TEA1  | 6.451983 | 6.426107 | 6.328715 | 6.216826 | 6.366999 | 5.789576 | 7.251747 | 7.151984 | 6.687941  | 7.052192  | 7.207254 | 6.598672 | 6.119597 | 5.861098 | 6.30737  | 6.798437 | -0.022    | -0.163   | 0.0845   | 0.010361 | 1.516812 | 12 |
| 8228_at   | YOR338W       | 7.677259 | 7.211635 | 7.184811 | 8.18575  | 8.534654 | 7.312445 | 9.299116 | 9.187023 | 8.714024  | 9.828669  | 9.591763 | 9.15961  | 8.105202 | 8.31365  | 7.793356 | 9.184914 | 0.262     | -0.416   | 0.000556 | 0.000129 | 4.172201 | 10 |
| 8229_at   | YOR297C TIM18 | 7.700325 | 7.878428 | 7.520038 | 8.325368 | 8.155142 | 8.145445 | 7.493216 | 7.837366 | 7.860903  | 7.29415   | 7.974886 | 7.961701 | 9.515779 | 8.760631 | 9.347709 | 7.911624 | 0.323     | 0.16     | 0.00015  | 0.000239 | 2.572094 | 8  |
| 8230_at   | YOR298W MUM3  | 4.126001 | 4.44228  | 4.059    | 4.360648 | 4.506586 | 4.673569 | 4.495153 | 4.708477 | 4.604976  | 4.498127  | 4.714834 | 4.780865 | 5.497157 | 5.740603 | 6.115618 | 4.683438 | 0.38      | 0.0891   | 3.9E-06  | 2.33E-06 | 2.734694 | 7  |
| 8231_at   | YOR298C-MBF1  | 10.56246 | 10.27512 | 9.421939 | 10.40123 | 10.21757 | 9.886955 | 10.06951 | 10.30184 | 10.40084  | 10.15722  | 10.33642 | 10.56157 | 11.33301 | 11.2595  | 11.43332 | 10.3197  | 0.31      | 0.11     | 0.000291 | 7.43E-05 | 2.274596 | 8  |
| 8232_at   | YOR299W BUD7  | 6.875674 | 6.87152  | 6.589244 | 7.799774 | 6.843867 | 6.475549 | 6.979898 | 6.807132 | 6.683983  | 6.977493  | 6.898798 | 6.984587 | 6.818252 | 6.910082 | 6.967875 | 6.877617 | 0.0463    | -0.0134  | 0.261    | 0.028364 | 1.130594 | 13 |
| 8233_g_at | YOR299W BUD7  | 6.61214  | 7.051099 | 7.210504 | 7.032803 | 6.72943  | 6.675307 | 6.635164 | 6.699126 | 6.582148  | 6.767511  | 6.824667 | 7.244285 | 7.398128 | 7.964908 | 7.520905 | 6.80101  | 0.179     | 0.135    | 0.000478 | 0.000114 | 1.895518 | 8  |
| 8234_at   | YOR300W       | 4.000154 | 4.203831 | 4.219838 | 4.101739 | 4.135315 | 4.3243   | 4.226461 | 4.261589 | 4.3925709 | 4.184417  | 4.0568   | 4.075881 | 4.476809 | 4.872653 | 4.549331 | 4.145964 | 0.108     | 0.0695   | 0.002    | 0.000386 | 1.415806 | 13 |
| 8235_at   | YOR301W RAX1  | 6.997462 | 6.299098 | 5.41663  | 6.118147 | 5.968867 | 6.089092 | 5.755721 | 5.803801 | 5.657662  | 5.407043  | 5.216327 | 4.826975 | 5.455125 | 5.440202 | 5.041843 | 5.490617 | -0.288    | 0.0843   | 0.0105   | 0.001622 | 2.14737  | 16 |
| 8236_at   | YOR302W       | 9.329301 | 8.74495  | 7.723856 | 8.560601 | 8.654026 | 8.957196 | 10.98734 | 10.54508 | 11.09439  | 10.96508  | 10.90249 | 10.28123 | 10.71809 | 10.40402 | 10.90073 | 10.48532 | 0.574     | -0.269   | 0.00597  | 0.000995 | 4.824654 | 10 |
| 8237_at   | YOR303W CPA1  | 10.58699 | 10.30528 | 10.31221 | 10.8163  | 10.90138 | 10.9023  | 11.7131  | 11.40969 | 11.58286  | 11.86048  | 11.70977 | 11.93716 | 11.74745 | 11.60905 | 11.95854 | 11.65308 | 0.382     | -0.161   | 3.26E-06 | 2.04E-06 | 2.755348 | 9  |
| 8238_at   | YOR304W ISW2  | 5.014645 | 5.023479 | 5.222171 | 4.994288 | 5.135668 | 4.95867  | 5.496361 | 5.45771  | 5.042793  | 5.443446  | 5.283991 | 5.175844 | 7.507355 | 6.236603 | 6.493673 | 5.290884 | 0.409     | 0.172    | 5.22E-05 | 1.79E-05 | 3.11853  | 8  |
| 8239_at   | YOR304C-A     | 5.770229 | 6.081972 | 6.718547 | 5.818221 | 5.800052 | 5.668286 | 5.642157 | 5.705986 | 5.444566  | 5.396639  | 5.685476 | 5.310746 | 6.266619 | 5.447994 | 5.66185  | 5.50211  | -0.16     | 0.105    | 0.000378 | 0.000668 | 1.668254 | 14 |
| 8240_at   | YOR305W       | 7.067289 | 7.156174 | 7.506394 | 7.3806   | 7.441956 | 6.878094 | 6.968432 | 7.12842  | 6.276876  | 7.018075  | 6.34436  | 6.503144 | 8.245851 | 7.510712 | 7.66383  | 6.77939  | 0.103     | 0.214    | 0.0102   | 0.001586 | 1.954237 | 8  |
| 8241_at   | YOR306C MCH5  | 7.913909 | 7.649359 | 7.894433 | 8.088644 | 8.219959 | 8.399574 | 9.916785 | 9.045531 | 9.602564  | 10.899709 | 10.30577 | 10.59435 | 12.28476 | 12.03185 | 12.14361 | 9.976244 | 1.18      | -0.00741 | 1.47E-08 | 4.84E-08 | 22.73164 | 1  |
| 8242_at   | YOR307C SLY41 | 6.420012 | 6.661325 | 6.600568 | 6.687536 | 6.602563 | 6.122736 | 7.270901 | 7.052759 | 6.670984  | 7.220529  | 7.127924 | 7.282053 | 6.107565 | 6.120022 | 6.272121 | 6.98733  | -0.0346   | -0.185   | 0.0107   | 0.001652 | 1.62334  | 12 |
| 8243_at   | YOR308C SNU66 | 4.396113 | 4.638141 | 5.453179 | 4.66642  | 4.775897 | 4.460399 | 5.179598 | 5.243196 | 4.688548  | 5.977309  | 4.957037 | 4.838257 | 4.299664 | 4.081716 | 4.312054 | 5.009601 | -0.105    | -0.141   | 0.116    | 0.013778 | 1.660317 | 12 |
| 8244_i_at | YOR309C       | 10.0572  | 10.49471 | 10.26931 | 9.995102 | 10.00844 | 9.830976 | 10.13259 | 9.893011 | 9.656584  | 9.914114  | 9.230692 | 9.964802 | 9.791071 | 9.593098 | 9.250369 | 9.762404 | -0.188    | 0.0396   | 0.00742  | 0.0012   | 1.64519  | 16 |
| 8245_r_at | YOR309C       | 5.900243 | 6.412685 | 6.970469 | 5.974614 | 5.911829 | 5.641602 | 6.071987 | 5.583667 | 5.963034  | 5.951695  | 5.79439  | 5.295761 | 5.810144 | 5.039702 | 5.494873 | -0.324   | 0.078     | 0.0018   | 0.000351 | 2.362015 | 16       |    |
| 8246_s_at | YOR309C       | 11.62759 | 11.774   | 11.93712 | 11.48516 | 11.35163 | 10.85737 | 11.21748 | 10.99963 | 10.39707  | 10.85729  | 10.2765  | 10.44618 | 10.27013 | 10.07986 | 9.673815 | 10.67642 | -0.464    | 0.0612   | 1.77E-05 | 7.44E-06 | 3.42509  | 16 |
| 8247_at   | YOR310C NOP58 | 10.26936 | 10.4477  | 10.28716 | 9.902843 | 9.75163  | 9.462197 | 9.702183 | 9.504371 | 8.694556  | 9.248519  | 8.59943  | 8.842988 | 8.632868 | 8.413913 | 8.192623 | 9.0764   | -0.511    | 0.0804   | 8.53E-06 | 4.20E-06 | 3.879195 | 18 |
| 8248_at   | YOR311C HSD1  | 8.376043 | 8.283267 | 8.115607 | 8.539203 | 8.459988 | 8.150476 | 8.928373 | 8.77457  | 8.733779  | 9.608562  | 9.339999 | 9.431684 | 9.070718 | 9.467309 | 9.223314 | 9.070811 | 0.319     | -0.0946  | 0.000222 | 5.90E-05 | 2.33127  | 9  |
| 8249_at   | YOR313C SPS4  | 4.164363 | 3.968119 | 5.02724  | 4.931558 | 4.982033 | 4.475169 | 5.355447 | 5.503096 | 5.122804  | 5.392975  | 4.953378 | 4.922508 | 4.470162 | 4.183730 | 4.106273 | 5.200109 | -0.0302   | -0.245   | 0.00335  | 0.000602 | 1.865342 | 12 |
| 8250_at   | YOR314W       | 3.644464 | 3.601851 | 4.776169 | 3.59042  | 3.696309 | 3.757612 | 3.525007 | 3.368875 | 3.312082  | 3.530275  | 3.548281 | 3.394944 | 3.532362 | 3.579124 | 3.223586 | 3.438497 | -0.137    | 0.0786   | 0.0647   | 0.00817  | 1.508386 | 16 |
| 8251_at   | YOR315W SFG1  | 6.303003 | 6.330486 | 6.584672 | 5.303898 | 5.516047 | 4.786236 | 4.22173  | 4.460732 | 4.486553  | 4.359338  | 4.22524  | 4.322633 | 4.450869 | 3.67787  | 3.771081 | 4.331521 | -0.537    | 0.216    | 5.01E-06 | 6.82E-06 | 4.156515 | 18 |
| 8252_at   | YOR276W CAF20 | 10.04709 | 10.00243 | 10.39862 | 9.531431 | 9.74137  | 9.550082 | 9.336091 | 9.220499 | 9.029929  | 8.786321  | 8.633341 | 8.418244 | 8.852011 | 8.371001 | 8.401507 | 8.907436 | -0.449    | 0.125    | 7.24E-07 | 6.62E-07 | 3.291489 | 14 |
| 8253_at   | YOR277C       | 6.068051 | 6.40181  | 6.749702 | 4.974791 | 5.818756 | 5.297976 | 5.814654 | 5.577861 | 5.440493  | 5.242349  | 5.330661 | 5.270132 | 6.061415 | 6.340276 | 5.010418 | 5.266706 | -0.299    | 0.131    | 0.000597 | 0.000137 | 2.22297  | 14 |
| 8254_at   | YOR278W HEM4  | 6.98734  | 6.872465 | 7.340813 | 6.760709 | 6.82336  | 6.340087 | 6.670728 | 6.593934 | 6.292074  | 6.301512  | 6.041339 | 6.302764 | 6.374435 | 6.607951 | 6.214151 | 6.362187 | -0.192    | 0.104    | 0.000259 | 6.75E-05 | 1.751999 | 14 |
| 8255_at   | YOR279C RFM1  | 4.047904 | 4.045936 | 5.803369 | 4.144515 | 4.266379 | 3.868458 | 4.260413 | 4.246184 | 3.746101  | 4.596745  | 3.666871 | 3.746148 | 3.698248 | 3.660193 | 3.409057 | 3.962357 | -0.249    | 0.0357   | 0.0817   | 0.01004  | 1.934241 | 16 |
| 8256_at   | YOR280C FSH3  | 7.090908 | 7.116807 | 7.860527 | 6.950813 | 6.935722 | 6.877462 | 6.588284 | 6.413057 | 6.434329  | 5.871108  | 6.054909 | 5.900168 | 5.197742 | 5.499923 | 5.429055 | 6.227697 | -0.531    | 0.0381   | 3.82E-07 | 4.25E-07 | 4.087604 | 16 |
| 8257_at   | YOR281C PLP2  | 7.218944 | 7.2862   | 7.655559 | 6.84469  | 7.19726  |          |          |          |           |           |          |          |          |          |          |          |           |          |          |          |          |    |

|           |         |        |          |          |          |          |          |          |          |           |          |          |          |           |          |          |          |          |         |          |          |          |          |    |
|-----------|---------|--------|----------|----------|----------|----------|----------|----------|----------|-----------|----------|----------|----------|-----------|----------|----------|----------|----------|---------|----------|----------|----------|----------|----|
| 8288_at   | YOR267C | HRK1   | 8.625108 | 8.603066 | 8.327958 | 9.142909 | 8.789874 | 8.759828 | 9.328534 | 9.594734  | 9.35695  | 10.61957 | 10.63978 | 10.96178  | 12.20099 | 12.16995 | 12.09495 | 10.04062 | 1.01    | 0.0733   | 7.76E-10 | 9.87E-09 | 14.38431 | 6  |
| 8289_at   | YOR268C |        | 6.009117 | 6.03349  | 5.933373 | 6.095345 | 5.903498 | 5.768515 | 9.900525 | 5.716402  | 5.998703 | 5.899588 | 5.955557 | 5.642415  | 6.020311 | 6.11921  | 6.026113 | 5.855753 | 0.0127  | 0.0488   | 0.0662   | 0.008344 | 1.143218 | 13 |
| 8290_at   | YOR269W | PAC1   | 5.287233 | 5.639006 | 5.323214 | 5.84527  | 5.694771 | 5.682218 | 5.746994 | 5.738486  | 5.469195 | 5.871919 | 5.683944 | 5.734172  | 5.434642 | 5.615013 | 5.466048 | 5.759067 | 0.0208  | -0.0803  | 0.00927  | 0.001454 | 1.25548  | 13 |
| 8291_at   | YOR270C | VPH1   | 11.58598 | 11.70388 | 11.51338 | 11.44393 | 11.42394 | 11.09862 | 11.55263 | 11.2622   | 11.11674 | 10.86488 | 10.82702 | 10.74641  | 10.25639 | 10.69197 | 10.20619 | 11.03156 | -0.2569 | -0.0097  | 3.74E-06 | 2.26E-06 | 2.392254 | 16 |
| 8292_at   | YOR271C | FSF1   | 10.21761 | 10.32677 | 10.45622 | 10.08802 | 10.05318 | 9.8291   | 9.785443 | 9.730766  | 9.827148 | 9.657633 | 9.61231  | 9.377863  | 9.904402 | 9.013352 | 9.246485 | 9.652449 | -0.252  | 0.0582   | 0.000272 | 7.01E-05 | 1.949957 | 16 |
| 8293_at   | YOR272W | YTM1   | 8.317773 | 8.257227 | 7.606344 | 7.262481 | 7.187128 | 7.097558 | 7.328697 | 7.387484  | 7.129622 | 7.143184 | 7.061968 | 5.843098  | 6.06977  | 6.108385 | 6.104384 | 6.89204  | -0.511  | 0.0493   | 5.46E-05 | 1.86E-05 | 3.877272 | 18 |
| 8294_at   | YOR273C | TPO4   | 8.073097 | 8.07874  | 7.934884 | 10.07402 | 10.08264 | 9.768313 | 10.44072 | 10.0693   | 10.52019 | 10.3417  | 10.18015 | 10.6787   | 10.80821 | 10.51011 | 10.75176 | 10.59867 | 0.627   | -0.331   | 5.34E-07 | 5.38E-07 | 6.11308  | 4  |
| 8295_at   | YOR274W | MOD5   | 5.983836 | 5.723887 | 5.625588 | 7.290258 | 7.329201 | 6.94293  | 8.293274 | 8.251296  | 8.24479  | 8.174229 | 8.215497 | 8.123295  | 8.484084 | 7.962728 | 8.867485 | 8.262614 | 0.663   | -0.318   | 2.3E-06  | 1.57E-06 | 6.268316 | 4  |
| 8296_at   | YOR275C | RIM20  | 4.279209 | 4.491898 | 5.208339 | 4.586777 | 4.522346 | 4.345755 | 4.754523 | 4.477302  | 4.542264 | 4.447688 | 4.654092 | 5.397598  | 4.115112 | 4.346671 | 4.293863 | 4.6515   | -0.0659 | -0.0587  | 0.349    | 0.0368   | 1.282609 | 13 |
| 8297_at   | YOR231W | MKK1   | 7.20146  | 6.977066 | 6.758825 | 7.033344 | 6.883016 | 6.963675 | 7.40455  | 7.255884  | 7.39762  | 7.758838 | 7.718841 | 7.956604  | 7.713632 | 7.817722 | 8.004469 | 7.498759 | 0.272   | -0.0309  | 0.000255 | 6.66E-05 | 2.053967 | 9  |
| 8298_at   | YOR232W | MGE1   | 7.555141 | 7.855636 | 8.34228  | 7.638688 | 7.70211  | 7.672299 | 7.514498 | 7.39638   | 7.492306 | 7.459783 | 7.191702 | 7.774385  | 7.798749 | 7.522396 | 7.817642 | 7.471647 | -0.0559 | 0.0953   | 0.0458   | 0.005997 | 1.377679 | 13 |
| 8299_at   | YOR233W | KIN4   | 7.808404 | 7.917294 | 7.177473 | 7.848384 | 7.910034 | 7.595129 | 8.081045 | 8.135708  | 8.043117 | 8.116613 | 8.027848 | 7.697983  | 8.531661 | 8.432767 | 7.949813 | 8.030582 | 0.167   | -0.0176  | 0.0265   | 0.003674 | 1.55764  | 13 |
| 8300_f_at | YOR234C | RPL33B | 11.06479 | 11.33152 | 11.63634 | 10.8081  | 10.88047 | 11.00099 | 10.18689 | 10.45611  | 10.02277 | 9.744142 | 9.578716 | 9.761259  | 9.649154 | 9.476471 | 9.443785 | 10.01175 | -0.512  | 0.123    | 1.01E-06 | 8.56E-07 | 3.88401  | 18 |
| 8301_at   | YOR235W | IRC13  | 3.050906 | 3.223378 | 2.826532 | 2.813766 | 2.759744 | 3.027399 | 3.16122  | 2.930506  | 2.970466 | 3.298151 | 3.13345  | 2.966705  | 3.151867 | 3.483843 | 3.358574 | 3.029305 | 0.0924  | 0.0392   | 0.0191   | 0.002753 | 1.293952 | 13 |
| 8302_at   | YOR236W | DFR1   | 6.954421 | 7.031371 | 7.548218 | 6.745354 | 6.714106 | 6.778195 | 6.779945 | 6.310466  | 6.398681 | 6.172882 | 6.335522 | 6.734755  | 5.893278 | 6.176187 | 6.25876  | 6.428409 | -0.269  | 0.0587   | 0.000281 | 7.20E-05 | 2.037967 | 16 |
| 8303_at   | YOR237W | HES1   | 8.122749 | 8.228594 | 8.287271 | 7.946513 | 8.191612 | 8.230455 | 7.918207 | 7.910516  | 7.732949 | 7.853414 | 7.815538 | 7.973652  | 7.581924 | 7.955909 | 7.967774 | 7.899838 | -0.1    | 0.036    | 0.0129   | 0.001944 | 1.304835 | 13 |
| 8304_at   | YOR238W |        | 7.895453 | 8.012486 | 8.06361  | 8.073304 | 8.125293 | 7.967128 | 7.862035 | 7.679476  | 7.547108 | 7.482647 | 7.381259 | 7.176772  | 6.562294 | 6.825712 | 7.023312 | 7.55823  | -0.354  | -0.0556  | 5.02E-07 | 5.14E-07 | 2.535301 | 16 |
| 8305_at   | YOR239W | MET140 | 5.737997 | 6.183529 | 7.134524 | 6.293281 | 5.722967 | 5.974498 | 5.69618  | 5.988312  | 5.35949  | 5.152979 | 5.638541 | 5.499535  | 4.317112 | 4.359133 | 4.013909 | 5.538352 | -0.539  | -0.0681  | 3.42E-05 | 1.27E-05 | 4.7002   | 18 |
| 8307_at   | YOR241W | MBT7   | 6.692067 | 6.797059 | 8.471808 | 8.321577 | 8.455796 | 8.008518 | 8.451664 | 8.178955  | 8.114641 | 8.306168 | 8.108005 | 7.480303  | 7.043715 | 7.251995 | 6.828066 | 8.092455 | -0.39   | -0.0689  | 3.56E-06 | 2.18E-06 | 2.88026  | 16 |
| 8308_at   | YOR242C | SSP2   | 3.721757 | 3.659035 | 4.476303 | 4.050657 | 4.357926 | 4.11242  | 4.180852 | 4.106958  | 3.750169 | 4.037059 | 4.127449 | 3.884458  | 3.920094 | 4.184818 | 3.716476 | 4.069457 | -0.0155 | -0.031   | 0.711    | 0.069877 | 1.102898 | 13 |
| 8309_at   | YOR243C | PUS7   | 9.070365 | 8.934703 | 8.724318 | 7.937822 | 8.073623 | 7.836798 | 8.231923 | 7.891176  | 7.453491 | 7.434426 | 7.25877  | 6.986849  | 6.380951 | 6.589896 | 6.438707 | 7.435572 | -0.629  | 0.0684   | 3.38E-08 | 4.98E-08 | 5.291865 | 18 |
| 8310_at   | YOR244W | ESA1   | 6.457506 | 6.180033 | 6.763958 | 6.363113 | 6.84016  | 5.516525 | 6.818499 | 6.852007  | 6.287134 | 7.39545  | 6.863526 | 6.681449  | 7.303477 | 7.204158 | 7.137541 | 6.713978 | 0.235   | 0.0279   | 0.0342   | 0.004621 | 1.862945 | 8  |
| 8311_at   | YOR245C | DGA1   | 7.738157 | 7.755197 | 7.831541 | 8.625626 | 8.591351 | 8.038766 | 9.134471 | 8.98991   | 8.796877 | 9.574942 | 9.261723 | 9.700971  | 8.427248 | 8.691942 | 8.366612 | 9.212455 | 0.242   | -0.303   | 3.78E-05 | 1.37E-05 | 3.070208 | 10 |
| 8312_at   | YOR246C |        | 8.886713 | 8.61428  | 8.673928 | 8.019139 | 8.093674 | 7.677865 | 7.929297 | 7.687086  | 7.632319 | 8.322367 | 8.051668 | 7.601276  | 8.382894 | 7.571669 | 7.316715 | 7.76811  | 0.249   | 0.0993   | 0.0033   | 0.000594 | 1.933489 | 16 |
| 8313_at   | YOR247W | SRL1   | 10.69011 | 10.50935 | 9.478555 | 10.62097 | 10.42185 | 10.36442 | 10.04299 | 9.548172  | 9.763265 | 9.609916 | 9.479484 | 8.577572  | 8.395342 | 9.039938 | 8.359474 | 9.650195 | -0.481  | -0.0549  | 0.009003 | 0.001195 | 3.576125 | 18 |
| 8314_g_at | YOR247W | SRL1   | 9.904103 | 10.12681 | 9.556533 | 10.29864 | 9.974156 | 10.26314 | 9.410284 | 9.085062  | 9.127083 | 9.910172 | 8.973839 | 9.127834  | 8.206418 | 9.156008 | 8.439366 | 9.247195 | -0.39   | 0.00859  | 0.0024   | 0.00045  | 2.812655 | 16 |
| 8315_i_at | YOR248W |        | 7.816518 | 8.044307 | 7.897994 | 8.37537  | 7.762039 | 8.369736 | 6.722672 | 6.856924  | 6.189312 | 6.297562 | 6.433589 | 7.038951  | 5.880333 | 7.550023 | 6.427984 | 6.868899 | -0.05   | 0.127    | 0.0279   | 0.003853 | 2.924065 | 14 |
| 8316_at   | YOR249C | APC5   | 4.82933  | 5.004036 | 5.799532 | 5.153535 | 5.014366 | 4.832091 | 5.39954  | 5.035193  | 5.045741 | 5.358099 | 5.046766 | 5.193966  | 5.172908 | 5.130104 | 5.174337 | 5.126596 | 0.404   | 0.0407   | 0.463    | 0.047482 | 1.200278 | 13 |
| 8317_at   | YOR250C | CLP1   | 4.559721 | 4.523654 | 5.370883 | 4.568396 | 4.440588 | 4.310968 | 4.676284 | 4.477992  | 4.272233 | 4.671202 | 4.504185 | 5.0225    | 4.354155 | 4.800516 | 4.210177 | 4.542045 | -0.0524 | 0.0264   | 0.663    | 0.006568 | 1.159529 | 13 |
| 8318_at   | YOR251C |        | 8.712497 | 8.787327 | 9.203936 | 8.65908  | 8.777387 | 8.496579 | 8.607678 | 8.489578  | 8.428581 | 8.269729 | 8.150139 | 8.243306  | 7.246848 | 7.650076 | 7.530174 | 8.40646  | -0.367  | -0.0434  | 2.25E-07 | 2.91E-07 | 2.646144 | 16 |
| 8319_at   | YOR252W | TMA16  | 5.445027 | 6.284807 | 6.780183 | 5.497344 | 5.521584 | 5.817171 | 5.903456 | 5.758883  | 5.605244 | 5.805489 | 5.643688 | 5.577943  | 5.471701 | 5.154997 | 5.483759 | 5.610214 | -0.18   | 0.0388   | 0.0521   | 0.006729 | 1.609733 | 16 |
| 8320_at   | YOR209C | NPT1   | 9.494825 | 9.47295  | 9.111044 | 9.421391 | 9.516235 | 9.539903 | 9.49158  | 9.52901   | 9.33963  | 9.376044 | 9.368558 | 9.939894  | 8.551334 | 8.769869 | 8.93989  | 9.498439 | -0.141  | -0.122   | 0.000301 | 7.63E-05 | 1.691378 | 15 |
| 8321_at   | YOR210W | RPB10  | 10.10362 | 10.14759 | 10.36037 | 10.08386 | 10.10513 | 9.92412  | 9.923318 | 10.1032   | 9.893942 | 9.802562 | 10.05477 | 10.23085  | 9.135776 | 9.138295 | 9.309076 | 9.962498 | -0.235  | -0.0749  | 3.54E-05 | 1.30E-05 | 1.863809 | 16 |
| 8322_at   | YOR211C | MGM1   | 4.271726 | 4.285604 | 5.107397 | 4.553924 | 4.609921 | 4.023436 | 5.197777 | 4.745994  | 4.927671 | 4.82934  | 4.836111 | 5.022667  | 5.211241 | 5.052492 | 4.832982 | 4.769692 | 0.152   | -0.0011  | 0.108    | 0.012921 | 1.495049 | 13 |
| 8323_at   | YOR212W | STEA   | 6.955638 | 7.044888 | 7.647162 | 7.554227 | 7.758184 | 7.638694 | 7.721584 | 7.7446518 | 7.251114 | 7.225833 | 6.978941 | 7.212513  | 6.285178 | 6.695681 | 6.314168 | 7.392632 | -0.233  | -0.151   | 0.000136 | 3.92E-05 | 2.122885 | 15 |
| 8324_at   | YOR213C | SAS5   | 5.506351 | 5.084651 | 5.3855   | 5.115818 | 5.236366 | 4.863465 | 5.742002 | 5.482525  | 5.197602 | 6.107974 | 5.535396 | 6.094974  | 5.410989 | 5.363953 | 5.583321 | 5.571741 | 0.0974  | -0.0595  | 0.258    | 0.02806  | 1.350622 | 13 |
| 8325_at   | YOR214C |        | 3.581846 | 3.39871  | 4.930303 | 3.744871 | 3.801489 | 3.729095 | 4.243443 | 3.866501  | 3.637626 | 4.065871 | 3.726746 | 3.7119975 | 3.620289 | 3.906761 | 3.471411 | 3.821335 | -0.0666 | -0.00359 | 0.696    | 0.08856  | 1.930022 | 13 |
| 8326_at   | YOR215C |        | 6.832979 | 6.43203  | 6.815357 | 7.623799 | 7.614993 | 6.94788  | 8.337531 | 7.975624  | 7.77793  | 8.341804 | 7.649155 | 7.807916  | 6.134972 | 6.186281 | 5.50836  | 7.94912  | -0.16   | -0.453   | 0.000012 | 5.50E-06 | 3.735155 | 11 |
| 8327_at   | YOR216C | RUD3   | 6.207889 | 6.237305 | 6.791804 | 5.365173 | 5.660499 | 5.135913 | 5.016627 | 4.959831  | 4.441507 | 4.68615  | 4.245351 | 3.82777   | 3.638663 | 4.06653  | 3.729179 | 4.450971 | -0.677  | 0.182    | 1.75E-07 | 2.46E-07 | 6.010551 | 18 |
| 8328_at   | YOR217W | RF1    | 7.109299 | 7.06323  | 7.211028 | 6.262119 | 6.48567  | 6.04908  | 6.180849 | 5.985763  | 5.735333 | 5.936964 | 5.510318 | 5.310596  | 4.447491 | 4.786675 | 4.427628 | 5.692466 | -0.649  | 0.0385   | 2.93E-08 | 7.66E-08 | 5.58541  | 18 |
| 8329_at   | YOR218C |        | 5.511584 | 5.373645 | 5.868804 | 4.478387 | 4.716561 | 4.310146 | 5.406358 | 4.727842  | 4.732287 | 4.719551 | 4.188906 | 4.708984  | 4.674024 | 4.591    |          |          |         |          |          |          |          |    |

|           |                |          |          |          |          |           |          |          |           |          |           |          |          |          |          |          |          |         |          |          |          |          |    |
|-----------|----------------|----------|----------|----------|----------|-----------|----------|----------|-----------|----------|-----------|----------|----------|----------|----------|----------|----------|---------|----------|----------|----------|----------|----|
| 8361_at   | YOR204V ALE1   | 9.357371 | 8.433051 | 6.75156  | 7.874976 | 7.784991  | 7.563011 | 8.608126 | 8.743689  | 9.083944 | 9.267385  | 9.279659 | 9.952967 | 10.18911 | 9.014707 | 10.08596 | 8.76394  | 0.509   | 0.0618   | 0.00871  | 0.001376 | 3.855523 | 7  |
| 8362_at   | YOR205C FMP38  | 6.126464 | 6.306586 | 6.493701 | 7.357583 | 7.288679  | 6.906958 | 7.421064 | 7.565977  | 7.06285  | 8.350005  | 7.945054 | 7.988207 | 7.323432 | 9.047902 | 6.294739 | 7.774359 | 0.197   | -0.328   | 0.000182 | 5.02E-05 | 3.038262 | 10 |
| 8363_at   | YOR206V NCC2   | 4.098664 | 4.843479 | 3.938283 | 3.922687 | 4.227113  | 3.5777   | 4.131823 | 4.171685  | 3.514127 | 3.79867   | 3.600262 | 3.282848 | 3.903514 | 3.148817 | 3.428302 | 3.701272 | -0.216  | 0.0524   | 0.0244   | 0.003418 | 1.772616 | 16 |
| 8364_at   | YOR207C REC1   | 6.898955 | 8.791142 | 8.168664 | 8.316228 | 8.278114  | 8.160366 | 8.604082 | 8.508123  | 8.143707 | 6.639356  | 8.791325 | 8.707824 | 8.642563 | 8.762162 | 8.669086 | 8.496939 | 0.0721  | 0.0291   | 0.217    | 0.02408  | 1.218992 | 13 |
| 8365_at   | YOR208V PTP2   | 6.084486 | 6.237068 | 5.959825 | 6.2575   | 6.282178  | 5.984482 | 6.570019 | 6.430401  | 6.616773 | 6.932502  | 7.024119 | 7.457207 | 7.872748 | 7.789735 | 8.193465 | 6.790092 | 0.515   | 0.0588   | 1.42E-07 | 2.17E-05 | 3.91331  | 7  |
| 8366_at   | YOR165V SEY1   | 7.412002 | 7.429592 | 6.895504 | 7.077388 | 7.025776  | 6.986899 | 7.089208 | 6.714791  | 6.901477 | 6.866879  | 6.361035 | 6.849195 | 6.318549 | 6.373259 | 6.427076 | 6.75717  | -0.235  | 0.0149   | 0.000133 | 3.48E-05 | 1.866199 | 16 |
| 8367_at   | YOR166C SWT1   | 4.741142 | 4.68832  | 3.739638 | 4.0037   | 4.366167  | 3.817882 | 4.567425 | 4.15066   | 4.163928 | 4.229976  | 3.916862 | 3.415477 | 3.344629 | 3.441855 | 3.214092 | 3.995941 | -0.271  | -0.0395  | 0.00508  | 0.000866 | 2.052764 | 16 |
| 8368_i_at | YOR167C RPS28A | 8.688038 | 9.189376 | 10.16194 | 8.688038 | 8.624517  | 9.201233 | 7.631931 | 7.85691   | 7.898081 | 6.897256  | 6.704578 | 7.582272 | 6.434    | 6.744512 | 7.089903 | 7.539361 | -0.734  | 0.153    | 3.95E-05 | 1.42E-05 | 6.991658 | 18 |
| 8369_f_at | YOR167C RPS28A | 11.46601 | 11.58226 | 11.98806 | 11.14163 | 11.20007  | 11.41287 | 10.43931 | 10.54126  | 10.57811 | 9.752075  | 9.963588 | 10.29427 | 9.577395 | 9.976288 | 9.849555 | 10.32567 | -0.528  | 0.121    | 2.44E-06 | 1.65E-06 | 4.053685 | 18 |
| 8370_at   | YOR168V GLN4   | 7.129105 | 7.563937 | 7.364939 | 6.674695 | 6.937494  | 6.680418 | 6.317613 | 6.426273  | 6.248634 | 5.492481  | 5.619934 | 5.542662 | 5.20782  | 5.481979 | 5.138142 | 5.943715 | -0.579  | 0.107    | 2.16E-08 | 6.13E-08 | 4.637847 | 18 |
| 8371_at   | YOR169C        | 5.746143 | 6.413635 | 5.236848 | 5.028587 | 5.546321  | 5.121342 | 5.325086 | 5.500645  | 5.130597 | 4.813094  | 4.789577 | 4.614161 | 4.71124  | 4.954619 | 4.847922 | 4.955163 | -0.266  | 0.0993   | 0.00211  | 0.000405 | 2.02439  | 16 |
| 8372_at   | YOR170W        | 4.750356 | 5.161283 | 3.556181 | 4.442578 | 4.599668  | 4.054744 | 5.184422 | 4.978521  | 4.248648 | 5.257367  | 5.52881  | 4.68193  | 4.778679 | 5.27805  | 4.638386 | 4.88088  | 0.157   | -0.0593  | 0.302    | 0.032319 | 1.516141 | 13 |
| 8373_at   | YOR171C LCB4   | 5.443788 | 5.367106 | 4.109223 | 5.553302 | 5.39767   | 4.692286 | 6.054713 | 6.049043  | 5.828973 | 6.936988  | 6.379562 | 6.79019  | 5.896622 | 6.171715 | 5.869922 | 6.219304 | 0.345   | -0.216   | 0.00576  | 0.000963 | 2.938449 | 9  |
| 8374_at   | YOR172W YRM1   | 6.688792 | 6.623683 | 5.964385 | 6.755593 | 6.694514  | 6.48191  | 7.422929 | 7.060773  | 6.933167 | 8.170106  | 7.544155 | 7.409892 | 7.402885 | 7.292969 | 7.154102 | 7.351778 | 0.28    | -0.145   | 0.00245  | 0.000458 | 2.227387 | 10 |
| 8375_at   | YOR173W DCS2   | 6.034453 | 6.614669 | 6.9118   | 9.152347 | 8.887234  | 8.713918 | 9.493327 | 9.162958  | 9.436856 | 8.936595  | 8.918553 | 9.488053 | 8.617703 | 8.59014  | 8.562034 | 9.513534 | 0.456   | -0.527   | 5.05E-06 | 2.83E-06 | 7.450464 | 9  |
| 8376_at   | YOR174W MED4   | 7.629798 | 7.636812 | 8.041474 | 7.498823 | 7.532282  | 7.337898 | 8.287554 | 7.457937  | 7.310365 | 7.599192  | 7.513536 | 7.060127 | 7.476124 | 7.384187 | 6.9875   | 7.338247 | -0.113  | 0.0501   | 0.0315   | 0.004302 | 1.35475  | 16 |
| 8377_at   | YOR175C ALD1   | 9.802739 | 9.780853 | 9.516684 | 8.896511 | 9.007739  | 8.789596 | 8.896556 | 8.592937  | 8.678306 | 8.730778  | 8.337085 | 9.041035 | 8.740812 | 8.278966 | 8.717149 | 8.617628 | -0.266  | 0.14     | 0.000122 | 3.59E-05 | 2.151323 | 14 |
| 8378_at   | YOR176W HEM15  | 9.383915 | 9.286461 | 9.010268 | 9.346479 | 9.364466  | 9.379399 | 9.283595 | 9.118978  | 9.172795 | 8.704449  | 8.72441  | 9.190338 | 8.717386 | 8.845154 | 9.540178 | 9.02107  | -0.0867 | 0.0155   | 0.304    | 0.032579 | 1.25825  | 13 |
| 8379_at   | YOR177C MPC54  | 3.779866 | 3.746835 | 4.672623 | 4.094774 | 3.964769  | 3.898162 | 4.909249 | 4.795297  | 4.549164 | 4.376596  | 4.147701 | 4.255519 | 4.738622 | 6.181224 | 6.057256 | 4.483297 | 0.662   | 0.277    | 4.79E-05 | 1.67E-05 | 6.281869 | 5  |
| 8380_at   | YOR178C GAC1   | 5.257432 | 5.378312 | 5.532712 | 7.05512  | 7.085237  | 6.475074 | 7.999612 | 7.105582  | 7.958    | 8.822512  | 8.655272 | 8.909328 | 11.26483 | 10.42194 | 11.08899 | 8.423448 | 1.43    | -0.075   | 3.10E-10 | 6.18E-09 | 4.21402  | 1  |
| 8381_at   | YOR179C SYC1   | 7.109839 | 6.85942  | 7.033611 | 7.018254 | 7.27926   | 6.394055 | 7.48293  | 7.365857  | 7.06306  | 7.371666  | 6.819347 | 6.491146 | 6.349973 | 6.109971 | 6.242899 | 7.01162  | -0.195  | -0.111   | 0.00863  | 0.001366 | 1.832314 | 15 |
| 8382_at   | YOR180C DCI1   | 3.022226 | 2.933236 | 4.600638 | 3.085999 | 3.143947  | 2.690367 | 3.387169 | 3.180019  | 2.957385 | 3.086086  | 3.08383  | 3.336904 | 2.908756 | 2.82917  | 2.780628 | 3.056378 | -0.141  | 0.0276   | 0.303    | 0.03239  | 1.453593 | 16 |
| 8383_at   | YOR181W LAS17  | 6.587115 | 6.484637 | 6.911705 | 6.111423 | 5.811816  | 5.937117 | 6.151207 | 5.971023  | 5.383065 | 5.972437  | 5.766453 | 5.730021 | 5.596127 | 6.082053 | 5.637973 | 5.744904 | -0.208  | 0.126    | 0.00133  | 0.000271 | 1.895394 | 14 |
| 8384_f_at | YOR182C RPS30B | 12.03153 | 12.15184 | 12.41989 | 12.03261 | 12.03753  | 12.2001  | 11.89221 | 11.86818  | 11.74603 | 11.89396  | 11.71311 | 11.88185 | 11.6272  | 11.64927 | 11.59797 | 11.85932 | -0.152  | 0.0161   | 0.000188 | 5.16E-05 | 1.497123 | 16 |
| 8385_at   | YOR183W FVY12  | 3.813575 | 3.770051 | 5.317427 | 3.7385   | 3.640113  | 3.891091 | 3.632334 | 3.60024   | 3.370674 | 4.112794  | 4.039947 | 3.486395 | 6.586025 | 6.448514 | 5.079468 | 3.693397 | 0.439   | 0.407    | 9.67E-05 | 2.97E-05 | 5.453336 | 8  |
| 8386_at   | YOR184W SER1   | 10.469   | 10.50411 | 10.34729 | 9.711431 | 9.763062  | 9.425056 | 9.172102 | 9.060768  | 9.910956 | 8.7171301 | 8.468592 | 8.312138 | 8.333688 | 8.070938 | 8.310186 | 8.768779 | -0.592  | 0.16     | 8.12E-09 | 3.26E-08 | 4.793570 | 18 |
| 8387_at   | YOR185C GSP2   | 6.068081 | 6.204803 | 7.328704 | 8.874502 | 7.870509  | 8.486537 | 8.538976 | 8.208416  | 8.612492 | 7.528167  | 8.088381 | 9.041035 | 7.927525 | 8.173963 | 8.592698 | 8.568903 | 0.368   | -0.313   | 0.00271  | 0.0005   | 3.857123 | 10 |
| 8388_at   | YOR186W        | 4.618496 | 4.639203 | 5.48422  | 4.913767 | 4.828552  | 4.878565 | 5.445173 | 5.310497  | 5.205577 | 5.033835  | 5.074664 | 5.504098 | 5.458997 | 5.454174 | 5.369152 | 5.196015 | 0.138   | -0.0103  | 0.0789   | 0.009731 | 1.442282 | 13 |
| 8389_at   | YOR142W LSC1   | 8.953351 | 8.83012  | 8.531707 | 9.579687 | 9.619864  | 9.349752 | 10.01456 | 9.815233  | 9.763212 | 10.05874  | 9.665536 | 10.25835 | 8.28682  | 8.549297 | 8.61604  | 9.949312 | -0.0479 | -0.366   | 9.11E-07 | 7.92E-07 | 2.545956 | 12 |
| 8390_at   | YOR143C TH180  | 5.761791 | 5.441112 | 5.65453  | 5.314015 | 5.908296  | 5.123431 | 5.235904 | 5.074725  | 4.896387 | 4.935656  | 4.322184 | 4.125105 | 4.579119 | 4.498999 | 4.511884 | 4.820269 | -0.333  | 0.0766   | 0.000748 | 0.00165  | 2.414803 | 16 |
| 8391_at   | YOR144C ELG1   | 6.751418 | 6.515043 | 6.913611 | 6.779222 | 6.80335   | 6.544752 | 6.616619 | 6.553647  | 6.262425 | 6.40787   | 6.614144 | 6.385654 | 7.161144 | 6.78434  | 6.530496 | 6.514104 | 0.00927 | 0.0749   | 0.119    | 0.014044 | 1.210199 | 19 |
| 8392_at   | YOR145C PNO1   | 8.976209 | 9.151543 | 9.114656 | 8.991951 | 9.027902  | 8.611744 | 8.881788 | 9.154029  | 8.654665 | 8.656353  | 8.785091 | 8.808741 | 8.703503 | 8.781231 | 8.625788 | 8.799576 | -0.0994 | 0.025    | 0.0225   | 0.030778 | 1.30158  | 13 |
| 8393_at   | YOR146W        | 4.679481 | 4.718733 | 5.661568 | 4.273384 | 4.4571324 | 4.002782 | 5.035843 | 4.609211  | 4.766892 | 4.796172  | 4.580159 | 4.313494 | 4.389422 | 4.212414 | 4.212288 | 4.507723 | -0.159  | 0.0295   | 0.127    | 0.014888 | 1.523656 | 16 |
| 8394_at   | YOR147W MDM32  | 3.30462  | 3.240179 | 4.938451 | 3.23619  | 3.489098  | 3.007917 | 3.760411 | 3.8421258 | 3.320408 | 3.529067  | 3.447435 | 3.916292 | 4.28499  | 3.454809 | 4.567198 | 3.455215 | 0.0982  | 0.133    | 0.191    | 0.021463 | 1.607164 | 13 |
| 8395_at   | YOR148C SPP2   | 6.610543 | 6.393045 | 7.066199 | 6.745104 | 6.745967  | 6.493512 | 7.103851 | 7.063565  | 6.751509 | 7.30202   | 6.953287 | 6.779337 | 6.708304 | 6.555973 | 6.774937 | 6.932614 | 0.0198  | -0.0722  | 0.216    | 0.023983 | 1.229456 | 13 |
| 8396_at   | YOR149C SMP3   | 4.164465 | 4.20707  | 5.521761 | 4.171846 | 4.201933  | 4.260341 | 4.736602 | 4.126103  | 4.06158  | 4.207045  | 3.976293 | 4.31987  | 3.345331 | 3.89817  | 3.763806 | 4.157703 | -0.228  | -0.00586 | 0.037    | 0.004968 | 1.832164 | 16 |
| 8397_at   | YOR150W MRPL23 | 8.532292 | 8.175551 | 8.350024 | 8.722769 | 8.813322  | 8.930717 | 8.960128 | 8.795773  | 8.709572 | 8.317338  | 8.462669 | 8.812073 | 7.309177 | 7.432542 | 7.122975 | 8.722992 | -0.279  | -0.242   | 5.73E-08 | 1.18E-07 | 2.826362 | 12 |
| 8398_at   | YOR151C RPB2   | 8.725227 | 8.59288  | 8.391966 | 8.205481 | 8.273447  | 8.10478  | 8.32116  | 8.256004  | 8.791162 | 8.369443  | 8.170292 | 7.96971  | 8.963196 | 8.460747 | 8.624618 | 8.122864 | 0.0318  | 0.137    | 0.0016   | 0.000318 | 1.447927 | 13 |
| 8399_at   | YOR152C        | 3.90177  | 3.946674 | 5.335887 | 4.807037 | 4.339668  | 4.627809 | 5.294547 | 5.135237  | 5.036857 | 5.577627  | 5.836817 | 5.600301 | 6.136506 | 5.965278 | 5.439895 | 5.493092 | 0.607   | -0.0191  | 0.000634 | 0.000144 | 4.996285 | 6  |
| 8400_at   | YOR153W PDR5   | 8.114438 | 8.239286 | 8.390221 | 8.684333 | 8.511002  | 8.103882 | 8.734963 | 8.539804  | 9.03316  | 9.66673   | 9.638355 | 10.03342 | 11.22566 | 10.26974 | 11.55501 | 9.240546 | 0.764   | 0.102    | 6.86E-07 | 6.38E-07 | 7.584885 | 6  |
| 8401_at   | YOR154W SLP1   | 6.386202 | 5.953941 | 5.963859 | 6.124083 | 6.236055  | 5.157607 | 6.924496 | 6.500482  | 6.288874 | 6.888741  | 6.129217 | 6.106865 | 7.70337  | 6.221834 | 7.228328 | 6.419504 | 0.269   | 0.0357   | 0.0563   | 0.007216 | 2.04231  | 16 |
| 8402_at   | YOR155C ISN1   | 7.757361 |          |          |          |           |          |          |           |          |           |          |          |          |          |          |          |         |          |          |          |          |    |

|           |               |          |          |          |          |          |          |          |          |          |          |          |          |          |          |          |          |         |          |          |          |          |    |
|-----------|---------------|----------|----------|----------|----------|----------|----------|----------|----------|----------|----------|----------|----------|----------|----------|----------|----------|---------|----------|----------|----------|----------|----|
| 8433_at   | YOR141C ARP8  | 6.828077 | 6.758712 | 6.26037  | 7.257405 | 7.39188  | 6.996752 | 7.433758 | 7.25198  | 7.202731 | 7.749498 | 7.434659 | 7.342836 | 6.961152 | 7.056026 | 7.01745  | 7.42171  | 0.101   | -0.166   | 9.07E-05 | 2.82E-05 | 1.755568 | 12 |
| 8434_at   | YOR097C       | 6.626632 | 6.717118 | 6.760131 | 7.078639 | 7.403597 | 7.169518 | 7.868312 | 7.451441 | 7.385237 | 7.921804 | 7.322806 | 8.009561 | 7.242729 | 7.159579 | 7.60153  | 7.661393 | 0.179   | -0.179   | 0.000388 | 9.46E-05 | 2.057725 | 9  |
| 8435_at   | YOR098C NUP1  | 7.691643 | 8.007495 | 7.605306 | 7.415863 | 7.31182  | 7.639639 | 7.030284 | 7.088042 | 7.212358 | 7.512481 | 7.585822 | 7.146035 | 7.607253 | 7.170711 | 7.931532 | 7.260523 | 0.00717 | 0.137    | 0.00518  | 0.000881 | 1.403779 | 13 |
| 8436_at   | YOR099W KTR1  | 9.929542 | 9.971191 | 9.995969 | 9.812055 | 9.983121 | 10.20925 | 9.816427 | 9.187646 | 9.800505 | 9.725133 | 9.409161 | 9.836699 | 9.677804 | 9.979992 | 9.846697 | 9.697774 | -0.0471 | 0.0615   | 0.247    | 0.026911 | 1.251732 | 13 |
| 8437_at   | YOR100C CRC1  | 5.516312 | 5.586637 | 4.941738 | 6.017786 | 5.745541 | 5.665803 | 7.000622 | 7.400174 | 6.930874 | 8.74224  | 8.287112 | 8.462328 | 7.459811 | 7.593238 | 7.246866 | 7.608234 | 0.689   | -0.355   | 0.000181 | 4.99E-05 | 7.164985 | 4  |
| 8438_at   | YOR101W RAS2  | 5.031055 | 5.118709 | 4.869345 | 4.7466   | 4.648584 | 5.024156 | 4.425956 | 4.779325 | 4.773689 | 4.501196 | 4.522807 | 4.894313 | 4.327516 | 4.365227 | 4.350783 | 4.604136 | -0.17   | 0.0204   | 0.000154 | 4.36E-05 | 1.570655 | 16 |
| 8439_at   | YOR102W       | 4.468212 | 5.080925 | 4.669873 | 4.437945 | 4.732608 | 5.100294 | 4.42544  | 4.248607 | 4.690502 | 3.87847  | 4.50524  | 4.194193 | 4.639768 | 4.844581 | 4.730822 | 4.391576 | -0.0419 | 0.101    | 0.145    | 0.016722 | 1.366987 | 13 |
| 8440_at   | YOR103C OST1  | 6.770645 | 7.089037 | 7.463209 | 7.028427 | 6.92318  | 7.325193 | 6.753026 | 6.548348 | 6.58817  | 6.221487 | 6.369785 | 6.993539 | 6.310089 | 6.414778 | 6.413705 | 6.684814 | -0.208  | 0.031    | 0.00947  | 0.001481 | 1.737854 | 16 |
| 8441_at   | YOR104W PIN2  | 5.470152 | 5.171868 | 5.095079 | 5.748352 | 5.274265 | 4.827112 | 5.490853 | 5.389835 | 5.048733 | 6.113782 | 5.827013 | 5.534075 | 5.405481 | 5.289041 | 5.38238  | 5.542626 | 0.0743  | -0.0703  | 0.261    | 0.028332 | 1.335942 | 13 |
| 8442_g_at | YOR104W PIN2  | 4.919174 | 4.973124 | 4.393715 | 5.200309 | 4.901057 | 4.623618 | 5.439435 | 5.089887 | 5.317395 | 5.873986 | 5.329321 | 5.509667 | 5.456787 | 5.048814 | 5.73347  | 5.384471 | 0.199   | -0.0865  | 0.0109   | 0.00168  | 1.699469 | 9  |
| 8443_at   | YOR106W VAM3  | 6.149809 | 6.140743 | 6.313058 | 5.703448 | 5.917175 | 5.583283 | 5.838198 | 5.764045 | 5.498394 | 5.986035 | 5.435078 | 5.134253 | 5.459852 | 5.670611 | 5.776873 | 5.55584  | -0.145  | 0.0984   | 0.00495  | 0.000847 | 1.60243  | 14 |
| 8444_at   | YOR107W RGS2  | 5.957076 | 5.891089 | 5.231689 | 5.671825 | 5.939896 | 5.112257 | 6.831795 | 6.162792 | 6.632652 | 8.158233 | 7.31768  | 6.775134 | 6.873332 | 7.008844 | 7.282424 | 6.78444  | 0.539   | -0.0828  | 0.00262  | 0.000486 | 4.178794 | 7  |
| 8445_at   | YOR108W LEU9  | 7.672605 | 7.852665 | 7.416648 | 6.419814 | 6.544448 | 6.355884 | 6.392017 | 6.185391 | 6.120699 | 6.865294 | 6.447789 | 6.402761 | 8.710875 | 7.68129  | 7.363793 | 6.275324 | 0.102   | 0.409    | 3.08E-05 | 1.16E-05 | 3.049614 | 8  |
| 8446_at   | YOR109W INP53 | 7.566971 | 7.780907 | 7.271494 | 7.734611 | 7.410002 | 7.607303 | 7.721616 | 8.370855 | 7.888734 | 7.429518 | 9.092981 | 7.851354 | 7.734261 | 8.131468 | 7.592381 | 7.923214 | 0.101   | -0.0911  | 0.298    | 0.031941 | 1.46761  | 13 |
| 8447_at   | YOR110W TFC7  | 7.498958 | 7.526771 | 7.806279 | 7.389915 | 7.561488 | 7.154383 | 7.371299 | 7.176326 | 7.008246 | 7.463376 | 7.107887 | 7.063452 | 6.976373 | 6.902564 | 6.905338 | 7.185503 | -0.166  | 0.0225   | 0.00173  | 0.000341 | 1.554383 | 16 |
| 8448_at   | YOR111W       | 5.359892 | 5.447405 | 5.465529 | 5.181786 | 5.331927 | 4.93712  | 5.475012 | 5.290669 | 5.031376 | 5.17216  | 5.136515 | 5.278578 | 4.441264 | 4.545366 | 4.28319  | 5.162253 | -0.217  | -0.0603  | 0.000137 | 3.95E-05 | 1.776119 | 16 |
| 8449_at   | YOR112W CEX1  | 5.07039  | 5.307676 | 6.205435 | 5.069896 | 5.254183 | 4.968591 | 4.96487  | 4.768159 | 4.581552 | 4.660476 | 4.742811 | 4.955974 | 4.677878 | 4.903368 | 4.430145 | 4.763175 | -0.23   | 0.083    | 0.00651  | 0.001074 | 1.84148  | 16 |
| 8450_at   | YOR113W AZF1  | 3.085376 | 3.127552 | 4.657907 | 3.216128 | 3.05784  | 2.883466 | 3.371328 | 3.304093 | 3.103903 | 3.312086 | 3.218419 | 3.334326 | 3.779476 | 3.436298 | 3.598809 | 3.165286 | 0.0194  | 0.118    | 0.222    | 0.024547 | 1.357922 | 13 |
| 8451_at   | YOR114W       | 3.747314 | 3.991457 | 5.66454  | 4.07491  | 4.199732 | 3.815677 | 4.362798 | 4.049693 | 3.903538 | 3.875066 | 3.681073 | 3.754843 | 3.328657 | 3.557824 | 3.164187 | 3.863861 | -0.284  | 0.0102   | 0.0288   | 0.003961 | 1.232096 | 16 |
| 8452_at   | YOR115C TRS33 | 8.202789 | 8.189924 | 8.614624 | 7.662206 | 8.010117 | 7.293573 | 7.63715  | 7.238144 | 6.989515 | 7.328198 | 6.604023 | 6.61314  | 6.595231 | 6.758822 | 6.125402 | 7.035804 | -0.487  | 0.105    | 1.81E-05 | 7.53E-06 | 6.339709 | 18 |
| 8453_at   | YOR116C RPO31 | 8.032771 | 7.967889 | 7.662731 | 7.606855 | 7.770946 | 7.361719 | 7.779925 | 7.678628 | 7.406597 | 7.774766 | 7.749657 | 7.700159 | 9.148566 | 8.634252 | 8.34406  | 7.644296 | 0.213   | 0.179    | 3.76E-05 | 1.36E-05 | 2.179345 | 8  |
| 8454_at   | YOR117W RPT5  | 9.119131 | 8.899709 | 9.079043 | 8.896295 | 8.96449  | 8.696254 | 9.384481 | 8.983014 | 9.011188 | 9.279315 | 9.072497 | 9.129804 | 8.664119 | 8.901939 | 8.819832 | 9.067169 | -0.0342 | -0.0469  | 0.213    | 0.023598 | 1.181655 | 13 |
| 8455_at   | YOR118W       | 6.893894 | 6.54158  | 6.633265 | 6.313279 | 6.395958 | 6.125102 | 6.548029 | 6.321673 | 6.0142   | 6.117389 | 5.751071 | 5.59591  | 6.328652 | 6.018782 | 5.731294 | 6.01599  | -0.192  | 0.0946   | 0.00255  | 0.000476 | 1.713554 | 16 |
| 8456_at   | YOR119C RIO1  | 6.358977 | 6.676897 | 6.663467 | 6.327129 | 6.142728 | 5.812673 | 6.172971 | 6.160715 | 6.041602 | 6.488542 | 6.241739 | 5.945955 | 6.70779  | 6.071486 | 6.283078 | 6.23451  | -0.043  | 0.0572   | 0.457    | 0.046952 | 1.230646 | 13 |
| 8457_at   | YOR076C SK17  | 4.17797  | 4.523127 | 4.494389 | 4.418508 | 4.324152 | 4.133573 | 4.579427 | 4.421238 | 4.18814  | 4.407743 | 4.398435 | 4.387251 | 3.980124 | 4.156284 | 3.818142 | 4.357216 | -0.0958 | -0.0514  | 0.011    | 0.001691 | 1.33407  | 12 |
| 8458_at   | YOR077W RTS2  | 5.055856 | 4.865976 | 5.014459 | 4.856144 | 4.762919 | 4.914944 | 5.228164 | 5.067295 | 4.863291 | 5.26582  | 5.28768  | 5.47026  | 5.909088 | 4.485459 | 4.283735 | 5.067677 | -0.112  | -0.106   | 0.0276   | 0.003814 | 1.547458 | 12 |
| 8459_at   | YOR078W BUD21 | 6.667535 | 6.998373 | 8.087391 | 6.884425 | 7.013517 | 6.405522 | 6.531148 | 6.499672 | 6.586588 | 6.759613 | 7.392056 | 5.332055 | 5.299989 | 5.195789 | 5.23871  | 6.367542 | -0.478  | -0.0353  | 0.00676  | 0.00111  | 3.548992 | 18 |
| 8460_at   | YOR079C ATX2  | 7.168324 | 7.228568 | 7.559279 | 7.189171 | 7.410911 | 6.811952 | 6.719947 | 6.444889 | 6.434996 | 6.071058 | 6.018947 | 6.102292 | 5.035493 | 5.757948 | 5.205241 | 6.369498 | -0.545  | -0.00588 | 1.98E-06 | 1.40E-06 | 4.243117 | 18 |
| 8461_at   | YOR080W DIA2  | 7.002113 | 6.878107 | 6.926242 | 6.870068 | 7.118402 | 6.461504 | 7.214456 | 6.867242 | 6.607647 | 6.629888 | 6.497533 | 5.866362 | 6.121789 | 6.44339  | 6.180755 | 6.702027 | -0.187  | -0.0302  | 0.00195  | 0.000377 | 1.641702 | 16 |
| 8462_at   | YOR081C TGL5  | 2.75657  | 2.29496  | 7.712515 | 7.222246 | 7.165802 | 7.089595 | 7.195343 | 6.055385 | 6.89316  | 6.096387 | 7.329694 | 6.642117 | 6.951327 | 6.918662 | 7.061618 |          | -0.134  | 0.0177   | 0.00983  | 0.001531 | 1.427844 | 16 |
| 8463_at   | YOR082C       | 5.888416 | 5.677569 | 6.479388 | 5.692097 | 5.721659 | 5.493192 | 5.734971 | 5.511629 | 5.69526  | 5.586621 | 5.756427 | 5.48857  | 5.764475 | 5.612894 | 5.70869  | 5.57573  | -0.0724 | 0.0747   | 0.0498   | 0.006457 | 1.549333 | 13 |
| 8464_at   | YOR083W WHI5  | 5.150961 | 4.651608 | 5.400657 | 4.237136 | 4.124788 | 3.900695 | 4.61682  | 4.777046 | 4.617781 | 4.277394 | 5.01095  | 4.280976 | 4.210818 | 3.89515  | 4.364602 | 4.28805  | -0.195  | 0.0788   | 0.0295   | 0.004054 | 1.676031 | 16 |
| 8465_at   | YOR084W       | 8.157403 | 8.174291 | 8.233553 | 8.476186 | 8.186668 | 7.965596 | 8.193288 | 8.393789 | 8.25713  | 9.110256 | 9.225576 | 9.317852 | 8.45341  | 8.994878 | 8.385712 | 8.699186 | 0.189   | -0.0901  | 0.0408   | 0.005414 | 1.684201 | 9  |
| 8466_at   | YOR085W OST3  | 8.938998 | 8.678437 | 8.4049   | 8.474391 | 8.444897 | 8.295855 | 8.484129 | 8.288262 | 8.334312 | 7.760562 | 8.00441  | 8.072009 | 7.565847 | 7.462613 | 8.198667 |          | -0.336  | -0.0532  | 4.04E-05 | 1.45E-05 | 2.437906 | 16 |
| 8467_at   | YOR086C TCB1  | 7.139507 | 7.19372  | 7.147563 | 7.401364 | 7.167406 | 7.048049 | 7.699568 | 7.203135 | 7.357492 | 6.549134 | 6.592332 | 7.071686 | 5.621481 | 6.037935 | 5.599507 | 7.055961 | -0.383  | -0.164   | 2.45E-06 | 1.65E-06 | 2.92069  | 15 |
| 8468_at   | YOR087W YVC1  | 5.008554 | 4.285529 | 4.943867 | 3.80212  | 3.956    | 3.705558 | 4.592793 | 4.070212 | 4.571315 | 4.3866   | 4.30197  | 3.926533 | 3.83144  | 3.975035 | 3.265228 | 4.153852 | -0.226  | 0.00605  | 0.0499   | 0.00647  | 1.821126 | 16 |
| 8469_g_at | YOR087W YVC1  | 4.677951 | 4.431846 | 5.268058 | 4.484041 | 4.287423 | 4.464654 | 5.520625 | 4.468656 | 4.747704 | 4.727333 | 4.471104 | 4.289819 | 4.199446 | 4.324803 | 4.21378  | 4.454212 | -0.123  | 0.0146   | 0.0722   | 0.009013 | 1.383887 | 16 |
| 8471_at   | YOR089C PVS2  | 9.346383 | 8.742306 | 9.186584 | 9.361785 | 9.322059 | 9.193438 | 9.765543 | 9.71777  | 9.43671  | 10.19467 | 9.741    | 9.551488 | 9.447263 | 8.961155 | 9.195981 | 9.693979 | 0.0595  | -0.157   | 0.0107   | 0.001623 | 1.806848 | 16 |
| 8472_at   | YOR090C PTC5  | 6.788018 | 7.087421 | 7.132661 | 7.163486 | 7.620458 | 7.075681 | 6.808856 | 6.969761 | 6.9662   | 6.265675 | 6.492238 | 6.671782 | 6.376256 | 6.499994 | 6.133871 | 6.734755 | -0.21   | -0.0158  | 0.000519 | 0.000122 | 1.746865 | 16 |
| 8473_at   | YOR091W TMA46 | 6.427698 | 6.69496  | 7.256321 | 5.88362  | 6.128572 | 5.764363 | 5.641864 | 5.729821 | 5.241192 | 5.643373 | 5.063805 | 5.026569 | 5.365896 | 5.545105 | 5.457519 | 5.339771 | -0.352  | 0.216    | 1.83E-05 | 7.60E-06 | 2.974075 | 14 |
| 8474_at   | YOR092W E4M3  | 6.947851 | 6.887056 | 6.58361  | 6.941128 | 6.680805 | 6.971818 | 6.914621 | 6.260213 | 7.302995 | 7.420283 | 7.377252 | 7.419477 | 9.682861 | 9.207312 | 9.278756 | 7.196764 | 0.68    | 0.262    | 1.38E-08 | 4.71E-08 | 6.324283 | 5  |
| 8475_at   | YOR093C       | 4.202874 | 4.501338 | 3.817132 | 4.148998 | 3.9      |          |          |          |          |          |          |          |          |          |          |          |         |          |          |          |          |    |

|           |         |        |          |          |          |          |          |           |          |          |          |          |          |          |          |          |          |          |          |          |          |          |          |    |
|-----------|---------|--------|----------|----------|----------|----------|----------|-----------|----------|----------|----------|----------|----------|----------|----------|----------|----------|----------|----------|----------|----------|----------|----------|----|
| 8506_at   | YOR033C | EXO1   | 7.362967 | 7.342247 | 7.330101 | 7.045687 | 7.139465 | 7.067155  | 7.122261 | 7.003679 | 7.127042 | 7.504777 | 7.227186 | 7.106151 | 8.221276 | 8.223118 | 8.037276 | 7.154905 | 0.215    | 0.163    | 1.34E-08 | 4.68E-08 | 2.114466 | 8  |
| 8507_at   | YOR034C | AKR2   | 7.908403 | 8.114054 | 7.808383 | 7.631985 | 7.500466 | 7.730022  | 7.293802 | 7.344571 | 7.443047 | 7.152552 | 7.569881 | 7.601891 | 7.817707 | 8.020136 | 7.727804 | 7.399899 | -0.0238  | 0.138    | 0.00079  | 0.000173 | 1.451053 | 13 |
| 8508_at   | YOR035C | SHE4   | 6.383804 | 6.201437 | 5.623334 | 6.505002 | 6.377175 | 6.434769  | 6.676249 | 6.754585 | 6.835797 | 6.499794 | 7.022203 | 7.230958 | 6.486693 | 6.895638 | 7.027668 | 6.829446 | 0.201    | -0.11    | 0.00008  | 0.000558 | 1.801385 | 9  |
| 8509_at   | YOR036W | PE12   | 7.130527 | 6.738496 | 7.285388 | 7.467441 | 7.735915 | 7.033038  | 7.96487  | 7.626854 | 7.532486 | 8.858451 | 8.512756 | 8.399158 | 8.962682 | 9.257498 | 9.251099 | 8.161057 | 0.588    | -0.0208  | 8.7E-07  | 7.63E-07 | 4.750312 | 6  |
| 8510_at   | YOR037W | CYC2   | 6.381946 | 6.511395 | 6.079381 | 6.628093 | 6.776102 | 6.221928  | 6.534073 | 6.563239 | 6.584004 | 7.221147 | 6.713131 | 6.310466 | 6.358894 | 8.61018  | 7.677557 | 6.704963 | 0.463    | 0.158    | 1.88E-05 | 7.74E-06 | 3.412216 | 8  |
| 8511_at   | YOR038C | HIR2   | 6.234653 | 6.660047 | 6.332737 | 6.282571 | 6.129745 | 6.893724  | 6.811536 | 6.096114 | 5.810175 | 5.976495 | 5.702261 | 6.594063 | 5.528031 | 6.100032 | 5.658983 | 5.876101 | -0.173   | 0.0581   | 0.00226  | 0.000429 | 1.582582 | 16 |
| 8512_at   | YOR039W | CKB2   | 8.060414 | 8.064408 | 7.720097 | 8.376429 | 8.079726 | 7.408674  | 8.28698  | 8.001107 | 7.976483 | 8.029163 | 7.968792 | 7.974955 | 7.045164 | 6.727587 | 6.88527  | 8.001876 | -0.253   | -0.164   | 0.000107 | 3.22E-05 | 2.260264 | 15 |
| 8513_at   | YOR040W | GL04   | 5.21342  | 5.39156  | 5.761101 | 6.162089 | 6.273415 | 6.359106  | 6.589553 | 6.453236 | 6.430645 | 6.611771 | 6.677978 | 6.37724  | 5.45731  | 5.825564 | 6.058167 | 6.587851 | 0.0834   | -0.266   | 6.93E-06 | 3.59E-06 | 2.173841 | 12 |
| 8514_at   | YOR041C |        | 4.367594 | 4.32309  | 4.410923 | 4.182075 | 4.212596 | 4.330947  | 4.466383 | 4.27168  | 4.267814 | 4.441399 | 4.304129 | 3.921816 | 4.044691 | 4.272934 | 4.316097 | 4.250014 | -0.0397  | 0.00977  | 0.4      | 0.041599 | 1.109176 | 13 |
| 8515_at   | YOR042W | CUE5   | 6.661321 | 7.052208 | 7.243004 | 6.997642 | 7.015292 | 7.084058  | 7.177905 | 7.162514 | 6.819603 | 7.152528 | 7.93394  | 7.099785 | 6.150235 | 6.269355 | 6.439581 | 7.195804 | -0.134   | -0.158   | 0.00699  | 0.001142 | 1.814257 | 15 |
| 8516_at   | YOR043W | WHI2   | 6.741802 | 6.838785 | 6.802729 | 6.710456 | 6.666648 | 6.36523   | 6.816831 | 6.893774 | 6.359848 | 6.795778 | 7.851607 | 6.910429 | 7.0632   | 6.961191 | 6.638745 | 6.868324 | 0.0766   | -0.0137  | 0.566    | 0.056913 | 1.225234 | 13 |
| 8517_at   | YOR044W | IRC23  | 8.972753 | 8.912059 | 8.832447 | 9.031708 | 9.108777 | 8.780707  | 10.04521 | 9.755371 | 9.613096 | 10.23147 | 9.889517 | 9.831995 | 9.508909 | 9.268406 | 9.584812 | 9.760319 | 0.194    | -0.169   | 0.00467  | 0.000804 | 2.058081 | 9  |
| 8518_at   | YOR045W | TOM6   | 11.33016 | 11.40357 | 11.53919 | 11.60699 | 11.69315 | 11.76437  | 11.63718 | 11.55724 | 11.52999 | 11.12875 | 11.47467 | 11.69302 | 11.28227 | 11.52928 | 11.25027 | 11.56204 | -0.0404  | -0.044   | 0.155    | 0.017784 | 1.186368 | 13 |
| 8519_at   | YOR046C | DBP5   | 7.222989 | 10.00305 | 10.02982 | 9.491367 | 9.637846 | 8.979815  | 9.222165 | 9.054767 | 9.080757 | 8.837094 | 8.624469 | 8.123684 | 9.412287 | 8.705913 | 8.834974 | 8.811779 | -0.281   | 0.179    | 0.000431 | 0.000104 | 2.425268 | 14 |
| 8520_at   | YOR047C | STD1   | 7.760844 | 7.547255 | 7.444892 | 7.666508 | 7.78158  | 6.789778  | 7.994845 | 7.650532 | 7.43173  | 7.799031 | 7.559445 | 7.619219 | 9.170389 | 8.114547 | 8.705853 | 7.628672 | 0.272    | 0.135    | 0.00208  | 0.000399 | 2.217054 | 8  |
| 8521_at   | YOR048C | RAT1   | 6.359038 | 6.500548 | 7.121321 | 6.553074 | 6.574658 | 6.299927  | 6.955061 | 6.883222 | 6.541379 | 6.939372 | 7.073595 | 7.29742  | 7.836639 | 7.453176 | 7.882611 | 6.874822 | 0.302    | 0.0823   | 0.000152 | 4.33E-05 | 2.225469 | 4  |
| 8522_at   | YOR049C | RSB1   | 9.598866 | 5.622143 | 6.359243 | 7.794962 | 7.480686 | 7.250628  | 8.222973 | 7.947319 | 8.380192 | 9.396924 | 9.15978  | 10.3072  | 9.770556 | 9.553799 | 10.7693  | 9.878818 | 1.11     | -0.273   | 1.41E-07 | 2.17E-07 | 18.74245 | 8  |
| 8523_at   | YOR050C |        | 4.083548 | 4.016056 | 5.506247 | 3.846503 | 4.007912 | 3.884681  | 4.124015 | 3.840334 | 3.989451 | 4.066563 | 3.880367 | 3.781328 | 4.385709 | 4.203093 | 4.066868 | 3.855124 | -0.0678  | 0.14     | 0.0915   | 0.01116  | 1.564116 | 13 |
| 8524_at   | YOR051C |        | 7.834358 | 7.875946 | 8.039168 | 8.242292 | 8.272021 | 7.661498  | 8.263891 | 8.11385  | 7.986611 | 8.047847 | 8.013358 | 8.938166 | 7.148253 | 6.400785 | 8.125158 |          | -0.251   | -0.21    | 8.34E-05 | 2.62E-05 | 2.298981 | 15 |
| 8525_at   | YOR008A |        | 3.039524 | 3.042914 | 3.127921 | 3.163717 | 2.954991 | 3.021224  | 3.122798 | 3.130324 | 2.882481 | 3.000448 | 3.035562 | 3.045551 | 3.386372 | 3.106317 | 3.565215 | 3.043162 | 0.0663   | 0.0468   | 0.0105   | 0.0162   | 1.249042 | 13 |
| 8526_at   | YOR009W | TIR4   | 11.94032 | 11.98126 | 11.71992 | 11.48766 | 11.45197 | 11.53883  | 11.54692 | 11.2983  | 11.15643 | 11.42384 | 11.38942 | 11.04463 | 11.11248 | 11.13212 | 11.62734 | 11.47501 | -0.121   | 0.0265   | 0.0809   | 0.009959 | 3.178494 | 16 |
| 8527_at   | YOR010C | TIR2   | 13.18014 | 13.18493 | 12.88677 | 13.13318 | 13.20002 | 13.01657  | 13.07738 | 13.12749 | 13.13338 | 12.8959  | 13.48923 | 13.30974 | 12.95131 | 12.98789 | 12.80931 | 13.16743 | -0.0298  | -0.0472  | 0.159    | 0.018186 | 1.173363 | 13 |
| 8528_at   | YOR011W | AUS1   | 8.369881 | 8.60172  | 9.307781 | 7.360349 | 7.449036 | 7.820323  | 7.317434 | 7.388399 | 7.236797 | 8.703278 | 9.160041 | 9.374637 | 10.10795 | 9.805781 | 10.11081 | 8.016685 | 0.461    | 0.361    | 0.000593 | 0.000136 | 5.087846 | 8  |
| 8529_at   | YOR012W |        | 7.130261 | 6.962835 | 7.364977 | 7.271513 | 7.097723 | 7.339925  | 7.081109 | 7.169425 | 7.752249 | 6.629734 | 6.918314 | 5.218325 | 6.392143 | 5.089491 | 6.96563  |          | -0.459   | -0.193   | 8.85E-10 | 9.99E-09 | 3.588606 | 17 |
| 8530_g_at | YOR012W |        | 8.675951 | 8.543303 | 8.931636 | 8.970365 | 8.906242 | 8.606287  | 8.837156 | 8.633266 | 8.675723 | 7.870353 | 8.271902 | 8.38381  | 7.119482 | 7.395444 | 7.332788 | 8.479107 | -0.397   | -0.128   | 3.53E-07 | 3.99E-07 | 2.865477 | 10 |
| 8531_at   | YOR013W | IRC11  | 6.225416 | 8.45003  | 9.18336  | 9.007324 | 9.003236 | 8.774769  | 8.477276 | 8.408675 | 7.99334  | 8.302356 | 8.489675 | 8.194319 | 8.465331 | 7.476765 | 8.050188 | 8.715068 | -0.253   | -0.0526  | 0.00448  | 0.000776 | 1.958913 | 16 |
| 8532_at   | YOR014W | RTS1   | 5.512723 | 5.542274 | 5.765554 | 5.336124 | 5.300131 | 5.008554  | 6.17551  | 6.030764 | 6.100168 | 5.684166 | 6.070283 | 6.666565 | 6.320411 | 5.72224  | 6.368339 | 5.925818 | 0.187    | -0.0262  | 0.116    | 0.013744 | 1.642391 | 7  |
| 8533_at   | YOR015W |        | 7.803402 | 8.08156  | 8.099145 | 8.242884 | 8.088661 | 7.931932  | 8.250096 | 7.975826 | 8.109541 | 8.284827 | 8.359095 | 9.148319 | 9.243695 | 9.257499 | 9.099588 | 8.355501 | 0.328    | 0.0651   | 3.92E-05 | 1.41E-05 | 2.637169 | 13 |
| 8534_at   | YOR016C | ERP4   | 6.050268 | 6.194321 | 6.791896 | 6.30448  | 6.240242 | 6.098764  | 6.8095   | 6.423836 | 6.29237  | 6.224007 | 6.233049 | 6.631699 | 5.626781 | 5.539063 | 5.40404  | 6.36227  | -0.219   | -0.139   | 0.000523 | 0.000123 | 2.013022 | 15 |
| 8535_at   | YOR017W | PET127 | 6.427416 | 6.394787 | 6.331194 | 6.666593 | 6.749089 | 6.3966    | 6.939233 | 7.001333 | 6.646998 | 7.546663 | 6.80078  | 6.382377 | 6.466037 | 6.530942 | 6.060272 | 6.748061 | -0.00114 | -0.0963  | 0.05     | 0.006483 | 1.263632 | 13 |
| 8536_at   | YOR018W | ROD1   | 6.002536 | 6.131035 | 6.99486  | 6.205841 | 6.016882 | 5.997657  | 6.222468 | 5.987731 | 6.31342  | 5.845843 | 5.964743 | 6.310327 | 5.463631 | 5.913259 | 5.429244 | 6.044331 | -0.185   | -0.0182  | 0.0215   | 0.003059 | 1.632594 | 16 |
| 8537_at   | YOR019W |        | 6.123856 | 5.878441 | 6.163319 | 6.556548 | 6.371652 | 5.988866  | 6.638566 | 6.677091 | 6.480811 | 6.350153 | 6.38195  | 6.193999 | 6.068134 | 6.434827 | 6.150969 | 6.456286 | 0.0231   | -0.0874  | 0.0955   | 0.011557 | 1.281978 | 13 |
| 8538_at   | YOR020C | HSP10  | 9.871582 | 9.960738 | 10.46941 | 10.3406  | 10.34734 | 10.102116 | 10.22595 | 10.24071 | 10.20893 | 10.01801 | 10.22756 | 10.877   | 9.770938 | 10.14072 | 9.953274 | 10.35547 | -0.0358  | -0.0883  | 0.107    | 0.012751 | 1.303062 | 13 |
| 8539_at   | YOR021C |        | 9.114159 | 9.025575 | 9.090852 | 9.003322 | 9.087501 | 8.667215  | 9.025133 | 8.901534 | 8.827211 | 9.000817 | 8.447496 | 8.305815 | 7.703922 | 7.672683 | 7.537146 | 8.702715 | -0.371   | -0.0957  | 3.36E-07 | 3.85E-07 | 2.672383 | 15 |
| 8540_at   | YOR022C |        | 3.686479 | 3.850125 | 4.690689 | 3.920958 | 3.88887  | 3.785726  | 3.958473 | 3.95402  | 3.903384 | 4.039154 | 4.210248 | 4.395724 | 3.772522 | 4.260392 | 3.899077 | 4.021489 | 0.00847  | -0.00345 | 0.988    | 0.093959 | 1.022896 | 13 |
| 8541_at   | YOR023C | AHC1   | 5.548658 | 5.641814 | 5.952217 | 6.209892 | 5.967914 | 5.993769  | 6.303557 | 6.390293 | 6.224549 | 7.251118 | 7.243502 | 7.403255 | 8.856148 | 8.590453 | 8.201945 | 6.805105 | 0.771    | 0.0858   | 1.20E-09 | 1.13E-08 | 7.719638 | 6  |
| 8542_at   | YOR024W | IRC12  | 4.465722 | 4.47527  | 4.531518 | 4.461128 | 4.452555 | 4.47343   | 4.404341 | 4.473911 | 4.502138 | 4.501543 | 4.614552 | 4.232776 | 4.478843 | 4.529129 | 4.322109 | 4.451354 | -0.0119  | 0.00421  | 0.806    | 0.076293 | 1.03205  | 13 |
| 8543_at   | YOR025W | HST3   | 4.117863 | 4.226331 | 3.915667 | 4.166682 | 3.823007 | 4.178695  | 3.426131 | 3.600601 | 4.005492 | 3.536591 | 3.881758 | 3.653432 | 3.888514 | 3.521569 | 3.308129 | 3.743844 | -0.159   | -0.0187  | 0.0248   | 0.003976 | 1.524678 | 16 |
| 8544_at   | YOR026W | BUB3   | 5.430465 | 5.681161 | 5.119449 | 5.501288 | 5.240134 | 5.727005  | 5.18916  | 4.99136  | 5.371463 | 5.265786 | 5.377613 | 5.316014 | 4.807045 | 5.128229 | 4.914394 | 5.298678 | -0.111   | -0.0278  | 0.0456   | 0.005478 | 1.342708 | 16 |
| 8545_at   | YOR027W | ST11   | 6.462564 | 6.55306  | 6.568564 | 6.340908 | 5.328123 | 6.184853  | 5.973102 | 5.96325  | 6.226074 | 6.410348 | 6.365043 | 6.538788 | 8.2288   | 8.463997 | 8.406348 | 6.171696 | 0.486    | 0.347    | 3.88E-08 | 9.18E-08 | 5.150336 | 16 |
| 8546_at   | YOR028C | CIN5   | 5.987206 | 6.144014 | 5.109819 | 6.57254  | 5.57306  | 6.413047  | 5.796061 | 6.375533 | 7.603159 | 6.647139 | 6.718271 | 6.12336  |          |          |          |          |          |          |          |          |          |    |

|         |         |          |          |          |           |          |          |          |          |          |          |          |          |          |          |          |          |          |          |          |           |          |          |    |
|---------|---------|----------|----------|----------|-----------|----------|----------|----------|----------|----------|----------|----------|----------|----------|----------|----------|----------|----------|----------|----------|-----------|----------|----------|----|
| 8578_at | YOL029C | 8.012434 | 7.880129 | 7.168629 | 7.837383  | 7.846364 | 7.342918 | 7.162591 | 8.22825  | 7.580943 | 9.455747 | 8.10775  | 8.505114 | 8.432894 | 8.852474 | 8.429466 | 8.381179 | 0.391    | -0.0326  | 0.00536  | 0.000904  | 2.817326 | 7        |    |
| 8579_at | YOL028C | YAP7     | 6.706098 | 6.300395 | 5.272002  | 5.882741 | 5.85283  | 5.465509 | 7.168517 | 7.086285 | 6.423606 | 8.286568 | 7.381549 | 6.682441 | 7.700795 | 6.576684 | 6.713434 | 6.914517 | 0.338    | -0.12    | 0.0853    | 0.010453 | 2.452454 | 9  |
| 8580_at | YOL027C | MDM38    | 6.28246  | 6.452935 | 6.511955  | 7.302906 | 6.898669 | 7.154908 | 7.394391 | 7.457885 | 6.914927 | 9.328766 | 9.777111 | 7.13832  | 7.237734 | 6.930474 | 7.385891 | 0.171    | -0.171   | 6.94E-05 | 2.26E-05  | 1.988076 | 9        |    |
| 8581_at | YOL026C | MM1      | 9.579314 | 9.481971 | 9.981083  | 9.612779 | 9.643868 | 9.664572 | 9.141318 | 9.30295  | 9.332658 | 8.953873 | 9.160577 | 9.737242 | 9.012949 | 9.259348 | 9.190457 | 9.266489 | -0.155   | 0.0455   | 0.000483  | 0.000288 | 1.509472 | 16 |
| 8582_at | YOL025W | LAG2     | 5.524882 | 5.514796 | 4.79143   | 6.140325 | 5.954715 | 5.805807 | 6.384121 | 6.24237  | 5.992643 | 6.125071 | 6.328677 | 6.291844 | 6.181822 | 6.296476 | 6.276725 | 6.288501 | 0.238    | -0.142   | 0.000154  | 4.36E-05 | 2.068865 | 9  |
| 8583_at | YOL024W |          | 3.886242 | 3.862395 | 3.899249  | 3.862232 | 3.825586 | 4.083589 | 3.983616 | 4.070402 | 3.993602 | 4.352305 | 4.128755 | 4.098417 | 5.163466 | 5.579084 | 4.532662 | 4.106478 | 0.307    | 0.105    | 3.53E-05  | 1.30E-05 | 2.257395 | 8  |
| 8584_at | YOL023W | IFM1     | 5.205803 | 5.39139  | 5.367064  | 5.570416 | 5.962872 | 5.646402 | 6.004646 | 6.068999 | 5.709769 | 6.272815 | 7.395542 | 6.264573 | 7.224517 | 6.898867 | 6.581984 | 6.294648 | 0.445    | -0.0537  | 0.000119  | 3.51E-05 | 3.250726 | 7  |
| 8585_at | YOL022C |          | 8.215794 | 8.151692 | 8.159761  | 7.691709 | 7.944623 | 7.368728 | 7.821433 | 7.665494 | 7.440323 | 8.018311 | 7.467049 | 7.509226 | 8.417069 | 8.052306 | 7.734242 | 7.591747 | -0.017   | 0.143    | 0.0111    | 0.001697 | 1.453759 | 13 |
| 8586_at | YOL021C | DIS3     | 6.120393 | 6.307068 | 6.732083  | 5.747926 | 5.886344 | 5.756468 | 5.914766 | 5.874401 | 5.321453 | 5.79437  | 5.356676 | 5.72477  | 5.472953 | 5.732923 | 5.293055 | 5.594155 | -0.213   | 0.0933   | 0.00152   | 0.000305 | 1.76671  | 16 |
| 8587_at | YOL020W | TAT2     | 7.492036 | 7.032781 | 6.968749  | 6.32761  | 6.655406 | 6.072538 | 5.962786 | 6.214368 | 5.692296 | 5.381934 | 5.34799  | 5.081496 | 4.8733   | 5.105684 | 4.979077 | 5.574606 | -0.589   | 0.14     | 7.74E-08  | 1.44E-07 | 4.761966 | 18 |
| 8588_at | YOL019W |          | 6.966246 | 6.887156 | 7.016536  | 6.818152 | 6.836355 | 6.003246 | 6.216082 | 5.929368 | 5.948917 | 5.950461 | 5.942834 | 5.964361 | 5.451938 | 6.032169 | 5.489776 | 6.010911 | -0.339   | 0.0838   | 0.00019   | 5.22E-05 | 2.457916 | 16 |
| 8589_at | YOL018C | TLG2     | 6.161605 | 6.235446 | 6.706904  | 6.119053 | 6.260622 | 5.376725 | 6.371547 | 6.263705 | 5.702269 | 6.384481 | 6.061731 | 6.109921 | 6.392483 | 6.328355 | 6.015528 | 6.053354 | -0.00399 | 0.0645   | 0.481     | 0.049124 | 1.17643  | 13 |
| 8590_at | YOL017W | ESC8     | 3.020614 | 3.225411 | 4.827394  | 3.333892 | 3.165368 | 3.059425 | 3.285516 | 3.039726 | 2.796163 | 3.013563 | 2.85068  | 3.01749  | 2.893566 | 2.896894 | 2.810823 | 2.951174 | -0.203   | 0.0886   | 0.0676    | 0.008505 | 1.718196 | 16 |
| 8591_at | YOL016C | CMK2     | 9.011623 | 8.240805 | 8.305969  | 8.121077 | 8.266277 | 7.818325 | 8.306793 | 8.644134 | 8.291167 | 8.749786 | 8.775277 | 9.175847 | 8.779092 | 8.88584  | 8.734387 | 8.521219 | 0.138    | 0.0285   | 0.153     | 0.017568 | 1.440697 | 13 |
| 8592_at | YOL059W | GPD2     | 8.295494 | 8.24446  | 7.352652  | 6.870829 | 7.133601 | 6.346159 | 7.751591 | 7.732974 | 6.415835 | 7.511661 | 7.807949 | 6.485331 | 7.294595 | 7.939406 | 6.759411 | 7.037377 | -0.104   | 0.155    | 0.29      | 0.03113  | 1.721654 | 14 |
| 8593_at | YOL058W | ARG1     | 9.121209 | 9.6144   | 10.3952   | 9.987804 | 8.101065 | 8.179456 | 8.944425 | 8.158806 | 9.325601 | 8.104196 | 7.991799 | 8.318762 | 8.196907 | 7.5828   | 8.280419 | 8.150185 | -0.393   | 0.183    | 0.00519   | 0.000882 | 2.933038 | 14 |
| 8594_at | YOL057W |          | 3.198547 | 3.67015  | 3.799526  | 3.384391 | 3.837647 | 3.343034 | 3.881303 | 3.314203 | 3.14988  | 3.301266 | 3.02786  | 3.287063 | 3.281241 | 2.948958 | 3.095917 | 3.368202 | -0.162   | -0.0304  | 0.0212    | 0.003016 | 1.537565 | 16 |
| 8595_at | YOL056W | GP3      | 7.70747  | 7.519894 | 7.369707  | 6.994078 | 7.293966 | 6.626797 | 6.845488 | 6.461554 | 6.476528 | 6.887052 | 6.28226  | 6.210264 | 5.733039 | 5.882983 | 5.747291 | 6.469203 | -0.439   | 0.0446   | 0.964E-06 | 4.62E-06 | 3.20239  | 16 |
| 8596_at | YOL055C | TH120    | 8.355431 | 8.360911 | 8.486372  | 9.130423 | 9.122786 | 9.705429 | 8.663557 | 8.592178 | 9.002776 | 7.6433   | 9.081355 | 8.128701 | 8.861078 | 8.892365 | 8.896056 | 8.764887 | 0.0243   | -0.0181  | 0.958     | 0.091506 | 1.086433 | 13 |
| 8597_at | YOL054W | PSH1     | 6.685525 | 6.448856 | 6.522865  | 6.7273   | 6.953628 | 6.278612 | 7.216753 | 7.297918 | 6.457562 | 8.205598 | 7.648104 | 7.427288 | 7.911105 | 8.112127 | 7.493086 | 7.314211 | 0.393    | -0.04    | 0.000992  | 0.000211 | 2.83142  | 7  |
| 8598_at | YOL053W |          | 6.38466  | 6.057443 | 6.58247   | 6.444143 | 6.777441 | 6.026048 | 6.590037 | 6.7421   | 6.115672 | 6.618097 | 5.923357 | 5.921358 | 6.080848 | 5.395466 | 6.333272 | 6.112673 | -0.112   | -0.0467  | 0.238     | 0.02611  | 1.365295 | 16 |
| 8599_at | YOL052C | -DDR2    | 9.882032 | 9.247732 | 9.605726  | 9.91554  | 9.560131 | 9.111416 | 10.23804 | 10.24626 | 10.22782 | 11.0687  | 11.35311 | 11.58434 | 11.27311 | 11.24404 | 11.10863 | 10.63162 | 0.528    | -0.0799  | 0.00039   | 9.51E-05 | 4.052658 | 7  |
| 8600_at | YOL052C | SPE2     | 7.636367 | 7.754929 | 7.710049  | 7.642733 | 7.658908 | 7.144092 | 7.358882 | 7.431821 | 7.159874 | 6.99514  | 7.133947 | 7.112196 | 6.625899 | 6.36993  | 6.566748 | 7.18958  | -0.307   | -0.0211  | 1.09E-06  | 9.04E-07 | 2.257896 | 16 |
| 8601_at | YOL051W | GAL11    | 8.333805 | 8.184501 | 7.928236  | 8.192207 | 8.192147 | 7.528603 | 8.815209 | 8.394321 | 8.078709 | 8.511703 | 8.648533 | 8.66067  | 9.018816 | 8.7289   | 8.423944 | 8.418561 | 0.182    | -0.00158 | 0.0405    | 0.005375 | 1.620479 | 13 |
| 8602_at | YOL050C |          | 4.013439 | 4.351189 | 5.4044758 | 3.619585 | 4.017377 | 3.526934 | 4.437484 | 4.005719 | 3.621354 | 3.984758 | 3.841049 | 3.78196  | 4.469802 | 4.465736 | 3.938306 | 3.875333 | -0.0532  | 0.173    | 0.0681    | 0.008565 | 1.654559 | 14 |
| 8603_at | YOL049W | GSH2     | 7.69927  | 7.551725 | 7.898848  | 7.217956 | 7.202892 | 6.734382 | 6.666625 | 6.40296  | 6.282409 | 6.151244 | 6.405311 | 6.206933 | 6.101874 | 5.150671 | 5.10916  | 6.283746 | -0.682   | 0.0349   | 1.69E-08  | 5.29E-08 | 6.603559 | 18 |
| 8604_at | YOL048C |          | 4.704811 | 4.702656 | 6.220071  | 5.453147 | 5.410319 | 4.863078 | 5.083149 | 5.016753 | 5.198254 | 5.059636 | 5.030577 | 5.497974 | 5.144179 | 5.222031 | 5.226533 | 5.171225 | -0.00294 | 0.00981  | 0.989     | 0.090444 | 1.028871 | 14 |
| 8605_at | YOL047C |          | 4.345101 | 3.987631 | 5.17787   | 4.123628 | 4.212487 | 4.177119 | 4.133912 | 4.159394 | 4.693557 | 5.615308 | 5.324951 | 9.72574  | 8.850449 | 8.596416 | 4.954684 | 1.23     | 0.496    | 1.35E-08 | 4.68E-08  | 29.44093 | 3        |    |
| 8606_at | YOL046C |          | 3.110068 | 2.94939  | 4.264535  | 3.073478 | 2.977943 | 3.073368 | 3.273376 | 3.050662 | 2.981843 | 3.150439 | 3.201556 | 2.805479 | 2.93474  | 3.231805 | 3.064033 | 3.012595 | -0.081   | 0.065    | 0.286     | 0.030828 | 1.33306  | 13 |
| 8607_at | YOL045W | PSK2     | 6.219036 | 6.334766 | 6.255051  | 5.999993 | 6.001726 | 5.847613 | 6.312864 | 6.03438  | 5.948118 | 6.527083 | 6.438785 | 7.382452 | 7.015909 | 7.362336 | 6.220023 | 6.281    | 0.145    | 4.72E-07 | 4.92E-07  | 2.300781 | 8        |    |
| 8608_at | YOL044W | PEX15    | 7.767418 | 7.553464 | 7.884138  | 7.94775  | 8.020259 | 7.285357 | 7.852688 | 8.000418 | 7.964333 | 8.084002 | 8.19096  | 7.855618 | 8.25196  | 8.502867 | 7.97724  | 7.953674 | 0.138    | 0.00811  | 0.0283    | 0.003988 | 1.443109 | 13 |
| 8609_at | YOL043C | NTG2     | 7.205251 | 7.087576 | 7.456688  | 7.363204 | 7.210973 | 6.850109 | 7.757876 | 7.642062 | 7.155683 | 7.907269 | 7.608312 | 7.256232 | 7.129811 | 7.40088  | 6.841916 | 7.496818 | 0.000583 | -0.0835  | 0.272     | 0.029438 | 1.224759 | 13 |
| 8610_at | YOL042W | NGL1     | 5.600709 | 5.380462 | 5.551289  | 5.901864 | 5.692919 | 5.17764  | 5.482879 | 5.470337 | 5.55975  | 5.82447  | 5.722877 | 6.198248 | 7.072642 | 6.241157 | 6.439091 | 5.733911 | 0.285    | 0.0863   | 0.000276  | 7.11E-05 | 2.129885 | 8  |
| 8611_at | YOL041C | NOP12    | 4.530678 | 5.275552 | 5.085009  | 4.5519   | 4.325822 | 4.607212 | 4.527157 | 4.615119 | 4.151351 | 4.648862 | 4.06877  | 3.97127  | 4.333928 | 4.603363 | 4.111558 | 4.254973 | -0.166   | 0.11     | 0.013     | 0.00195  | 1.703326 | 14 |
| 8612_at | YOL040C | RPS15    | 11.71868 | 11.79705 | 12.07214  | 11.40221 | 11.06842 | 11.8707  | 10.76602 | 10.69084 | 11.03367 | 10.35209 | 10.54687 | 10.85132 | 9.166526 | 9.794805 | 9.581269 | 10.72937 | -0.61    | -0.00905 | 1.31E-06  | 1.04E-06 | 5.031944 | 18 |
| 8613_at | YOL039W | RPP2A    | 11.90266 | 12.02416 | 11.9519   | 11.48428 | 11.01066 | 11.79885 | 10.66895 | 10.81331 | 10.59087 | 9.658249 | 10.06473 | 10.33009 | 8.971799 | 9.498771 | 9.166849 | 10.39887 | -0.747   | 0.0579   | 1.69E-07  | 2.44E-07 | 7.24746  | 18 |
| 8614_at | YOL038W | PR6E     | 10.6871  | 10.62989 | 10.96174  | 10.67721 | 9.776567 | 10.67265 | 10.02775 | 10.43619 | 10.38691 | 10.02344 | 10.25584 | 10.22236 | 9.36961  | 9.662425 | 9.172402 | 10.17373 | -0.332   | -0.028   | 0.000244  | 6.41E-05 | 2.409885 | 16 |
| 8615_at | YOL038W |          | 6.909183 | 6.856701 | 7.411226  | 8.206511 | 8.104315 | 7.800718 | 8.468889 | 8.006506 | 8.193485 | 8.027972 | 7.997609 | 8.043091 | 7.560077 | 7.641547 | 7.481508 | 8.232605 | 0.0956   | -0.249   | 8.04E-05  | 2.55E-05 | 2.130998 | 12 |
| 8616_at | YOL038W | ATG19    | 7.430014 | 7.518061 | 8.243754  | 8.381798 | 8.358999 | 7.951174 | 8.802719 | 8.382254 | 8.494402 | 8.305263 | 8.098926 | 8.509631 | 6.991706 | 8.074164 | 7.925315 | 8.463046 | 0.029    | -0.178   | 0.00757   | 0.001222 | 1.160629 | 12 |
| 8617_at | YOL038W | IRA2     | 4.322774 | 4.341169 | 5.270391  | 4.64073  | 4.464535 | 4.430755 | 5.023414 | 4.939044 | 4.883496 | 4.944335 | 4.932511 | 5.599238 | 6.491782 | 5.998055 | 6.7074   | 4.984058 | 0.462    | 0.144    | 2.76E-05  | 1.06E-05 | 3.403731 | 7  |
| 8618_at | YOL038C | REX4     | 8.044199 | 7.884269 | 8.11563   | 7.305529 | 7.477445 | 6.567057 | 7.116569 | 6.923175 | 6.588266 | 7.076695 | 6.216576 | 5.432655 | 5.737228 | 5.598939 | 5.342673 | 6.4      |          |          |           |          |          |    |



|         |                |          |          |          |          |          |          |          |          |          |          |          |          |           |          |          |          |          |          |          |          |          |    |
|---------|----------------|----------|----------|----------|----------|----------|----------|----------|----------|----------|----------|----------|----------|-----------|----------|----------|----------|----------|----------|----------|----------|----------|----|
| 8650_at | YOL093W TRM10  | 6.172668 | 6.358866 | 6.765711 | 5.564675 | 5.706645 | 5.441028 | 5.473962 | 5.248789 | 5.007709 | 4.928787 | 4.849763 | 4.737956 | 4.339165  | 4.519063 | 4.267182 | 4.925638 | -0.543   | 0.132    | 1.25E-07 | 1.98E-07 | 4.212787 | 18 |
| 8651_at | YOL092W        | 8.19039  | 8.455    | 8.370091 | 8.004402 | 7.956809 | 8.144389 | 7.93706  | 7.838432 | 7.94314  | 7.288414 | 7.405439 | 7.640177 | 6.535169  | 6.896483 | 6.559115 | 7.651813 | -0.442   | -0.0408  | 3.90E-09 | 2.14E-08 | 3.223195 | 16 |
| 8652_at | YOL091W SPO21  | 4.683848 | 4.829065 | 5.150013 | 4.936398 | 4.930518 | 4.736494 | 5.039267 | 5.023842 | 5.068972 | 4.781753 | 4.794642 | 5.228724 | 4.917618  | 4.983265 | 4.906895 | 4.9655   | 0.0121   | -0.0159  | 0.802    | 0.077925 | 2.059117 | 13 |
| 8653_at | YOL090W MSH2   | 4.853088 | 5.586981 | 5.76242  | 5.371909 | 5.415298 | 4.877611 | 4.823491 | 4.703284 | 4.544863 | 4.238485 | 4.323981 | 4.214939 | 4.23009   | 4.20251  | 4.36074  | 4.545067 | -0.337   | 0.0858   | 0.000403 | 9.79E-05 | 1.443117 | 16 |
| 8654_at | YOL089C HAL9   | 5.403805 | 5.542993 | 5.516261 | 5.436561 | 5.423286 | 5.207404 | 5.519481 | 5.734502 | 5.433013 | 5.361157 | 6.281956 | 5.326059 | 5.987974  | 5.819375 | 5.246059 | 5.566799 | 0.0694   | 0.00485  | 0.517    | 0.052376 | 1.201863 | 13 |
| 8655_at | YOL088C MPD2   | 6.641972 | 6.782085 | 7.722619 | 6.672421 | 6.782264 | 6.745392 | 6.675038 | 6.811844 | 6.429726 | 6.518421 | 6.314504 | 6.805724 | 5.310875  | 5.89094  | 5.621341 | 6.615746 | -0.359   | -0.0733  | 0.000212 | 5.69E-05 | 2.591376 | 16 |
| 8656_at | YOL087C        | 6.521447 | 6.539169 | 6.797933 | 6.757215 | 6.760688 | 6.542122 | 7.099797 | 6.97059  | 6.707715 | 6.989196 | 6.750966 | 6.983491 | 8.254052  | 7.302869 | 7.204028 | 6.903581 | 0.241    | 0.0545   | 0.00257  | 0.000478 | 1.893051 | 8  |
| 8657_at | YOL086C ADH1   | 12.52239 | 12.59279 | 12.54818 | 12.38147 | 12.51104 | 12.49872 | 12.66521 | 12.6094  | 12.57693 | 12.64699 | 12.62415 | 12.94942 | 12.83676  | 12.82938 | 12.75198 | 12.63967 | 0.0813   | 0.00842  | 0.00844  | 0.001343 | 1.240417 | 13 |
| 8658_at | YOL085C        | 4.386053 | 4.288311 | 5.590684 | 4.517536 | 4.357792 | 3.79278  | 4.666713 | 4.436012 | 4.283211 | 4.069472 | 4.18039  | 3.981289 | 4.065624  | 4.135786 | 4.011208 | 4.168839 | -0.174   | 0.0638   | 0.0773   | 0.009554 | 1.587865 | 16 |
| 8659_at | YOL084W PHM7   | 4.744832 | 4.386419 | 5.507214 | 5.948661 | 5.525258 | 5.130398 | 6.537928 | 6.260117 | 5.940161 | 5.91114  | 6.00538  | 6.136736 | 5.582848  | 5.666143 | 5.718356 | 6.117345 | 0.195    | -0.236   | 0.00309  | 0.000559 | 2.418559 | 9  |
| 8660_at | YOL129W VPS68  | 9.812641 | 9.876692 | 9.781281 | 9.898588 | 9.86626  | 9.866731 | 9.887654 | 9.934761 | 9.677703 | 9.754849 | 9.86043  | 9.859872 | 9.490349  | 9.607833 | 9.508832 | 9.83833  | -0.0724  | -0.0434  | 0.00012  | 3.55E-05 | 1.254542 | 13 |
| 8661_at | YOL128C YGK3   | 8.133347 | 7.695756 | 6.716489 | 8.12231  | 8.084192 | 7.278932 | 8.930513 | 8.730543 | 8.324293 | 9.122409 | 8.98274  | 9.102232 | 8.009675  | 8.214046 | 8.418666 | 8.752393 | 0.246    | -0.254   | 0.00757  | 0.001222 | 2.75094  | 9  |
| 8662_at | YOL127W RPL25  | 10.54457 | 10.90322 | 11.35843 | 10.52186 | 10.5717  | 10.12115 | 10.23527 | 9.953117 | 10.10573 | 9.471759 | 9.209973 | 10.05793 | 8.236517  | 8.58338  | 9.058399 | 9.897764 | -0.626   | -0.0264  | 5.57E-06 | 3.03E-06 | 5.259942 | 18 |
| 8663_at | YOL126C MDH2   | 7.601732 | 7.933824 | 7.408782 | 8.295265 | 8.262688 | 8.027381 | 8.968009 | 9.067866 | 9.094812 | 8.869795 | 8.534696 | 8.894387 | 8.137346  | 8.030997 | 7.92334  | 8.848099 | 0.107    | -0.282   | 0.000219 | 5.84E-05 | 2.347229 | 12 |
| 8664_at | YOL125W TRM13  | 6.276544 | 6.524651 | 6.198348 | 5.801049 | 6.00922  | 5.841263 | 6.477355 | 6.189517 | 5.850059 | 6.45256  | 6.074452 | 6.444005 | 7.366299  | 6.908188 | 7.069626 | 6.149377 | 0.223    | 0.153    | 9.61E-05 | 2.96E-05 | 2.090634 | 8  |
| 8665_at | YOL124C TRM11  | 7.564852 | 7.829922 | 7.4811   | 7.268814 | 7.601273 | 6.547182 | 7.603234 | 7.552828 | 6.70428  | 7.159766 | 6.512491 | 5.826164 | 5.400431  | 5.32647  | 5.285118 | 6.804804 | -0.597   | -0.0906  | 4.05E-05 | 1.45E-05 | 4.864839 | 18 |
| 8666_at | YOL123W HRP1   | 8.420243 | 8.48114  | 8.635614 | 7.998448 | 7.686306 | 7.032321 | 7.178654 | 7.582322 | 7.185961 | 9.078836 | 8.879711 | 8.79483  | 10.94204  | 10.72328 | 10.63563 | 8.080987 | 0.672    | 0.418    | 9.61E-07 | 8.26E-07 | 4.850919 | 5  |
| 8667_at | YOL122C SMF1   | 8.09574  | 7.925843 | 7.953236 | 8.252317 | 8.241836 | 7.771351 | 8.221444 | 7.819728 | 7.701701 | 7.80171  | 7.294186 | 7.986413 | 5.979186  | 6.67154  | 6.020737 | 7.823712 | -0.451   | -0.196   | 2.47E-06 | 1.66E-06 | 3.54819  | 17 |
| 8668_at | YOL120C RPL18A | 11.78342 | 11.89034 | 12.21536 | 11.58682 | 11.47922 | 12.00344 | 10.86052 | 11.04294 | 8.83067  | 9.441935 | 9.602996 | 10.2452  | 7.957167  | 8.018482 | 8.531494 | 10.4238  | -1.06    | -0.096   | 1.92E-08 | 5.81E-08 | 16.48869 | 20 |
| 8669_at | YOL119C MCH4   | 6.730678 | 6.700199 | 7.384678 | 7.003104 | 7.087752 | 6.412306 | 6.794889 | 7.568754 | 7.423476 | 6.816126 | 7.088573 | 7.205019 | 7.274474  | 7.0823   | 6.960078 | 7.191364 | 0.0366   | -0.0507  | 0.041    | 0.063674 | 1.199148 | 13 |
| 8670_at | YOL118C        | 3.431681 | 3.55913  | 5.161871 | 3.448245 | 3.46271  | 3.184437 | 3.756725 | 3.492781 | 3.386401 | 3.485688 | 3.414307 | 3.214822 | 3.419938  | 3.478823 | 3.133985 | 3.37403  | -0.162   | 0.0939   | 0.133    | 0.015553 | 1.628134 | 14 |
| 8671_at | YOL117W RRI2   | 3.619722 | 3.510375 | 4.925363 | 3.722928 | 3.779112 | 3.493942 | 4.018228 | 3.726685 | 3.747887 | 3.532987 | 3.645926 | 3.568039 | 3.540919  | 3.357501 | 3.210971 | 3.634519 | -0.161   | 0.0137   | 0.113    | 0.013432 | 1.531916 | 16 |
| 8672_at | YOL116W MSN1   | 5.348729 | 5.260126 | 5.990506 | 5.515711 | 5.706952 | 5.217799 | 5.876308 | 5.729982 | 5.356473 | 5.685512 | 5.519596 | 5.535548 | 6.16576   | 6.06003  | 5.639995 | 5.59258  | 0.104    | 0.0409   | 0.108    | 0.012847 | 1.32926  | 13 |
| 8673_at | YOL115W PAP2   | 8.956177 | 6.1931   | 6.914226 | 5.843803 | 5.910413 | 5.664395 | 5.861264 | 5.759644 | 5.388095 | 5.951327 | 6.098051 | 5.875796 | 6.235078  | 6.29869  | 5.807939 | 5.685838 | -0.0393  | 0.146    | 0.0258   | 0.003585 | 1.515008 | 13 |
| 8674_at | YOL114C        | 4.530289 | 4.561589 | 5.839838 | 4.283777 | 4.470022 | 3.898654 | 4.308579 | 4.145031 | 3.918095 | 4.546245 | 4.229588 | 4.528712 | 3.866213  | 4.142025 | 4.23127  | 4.127933 | -0.166   | 0.103    | 0.105    | 0.012544 | 1.673825 | 14 |
| 8675_at | YOL113W SKM1   | 6.545793 | 6.201351 | 6.576856 | 6.403235 | 6.324064 | 5.701701 | 6.226246 | 6.064126 | 5.931785 | 6.678494 | 6.44637  | 6.646215 | 7.867517  | 7.427838 | 6.977221 | 6.297816 | 0.266    | 0.163    | 0.00011  | 3.30E-05 | 2.31762  | 8  |
| 8676_at | YOL112W MSB4   | 7.256948 | 7.10114  | 7.502137 | 7.121445 | 6.964187 | 6.630872 | 7.587038 | 6.974451 | 6.964742 | 7.885932 | 7.272893 | 7.101866 | 7.091091  | 6.860777 | 6.439516 | 7.169335 | -0.0747  | -0.0427  | 0.451    | 0.046477 | 1.258312 | 13 |
| 8677_at | YOL111C MDY2   | 7.833195 | 8.139397 | 8.408832 | 8.114457 | 7.74752  | 8.396841 | 8.682612 | 7.604363 | 8.008853 | 7.603634 | 8.480494 | 7.959482 | 8.306292  | 8.582097 | 8.026305 | 0.06095  | 0.06949  | 0.361    | 0.03788  | 1.242801 | 13       |    |
| 8678_at | YOL110W SHR5   | 7.685576 | 7.456557 | 7.915886 | 8.037609 | 7.815437 | 7.713568 | 8.023898 | 8.241285 | 7.826654 | 8.341025 | 8.220588 | 7.865894 | 7.587138  | 8.270373 | 7.46527  | 8.093018 | 0.0336   | -0.101   | 0.0773   | 0.009554 | 1.346889 | 16 |
| 8679_at | YOL109W ZEO1   | 7.585557 | 7.052661 | 7.169652 | 7.640461 | 7.722472 | 7.026011 | 8.134642 | 8.150365 | 8.206108 | 8.890635 | 9.220445 | 9.812491 | 9.722402  | 9.974881 | 8.526945 | 0.751    | -0.0128  | 2.29E-07 | 2.94E-07 | 3.715688 | 6        |    |
| 8680_at | YOL108C INO4   | 5.627288 | 5.692211 | 5.949485 | 6.285995 | 6.254554 | 6.164615 | 6.639787 | 6.574471 | 6.491603 | 6.632989 | 6.032179 | 6.106951 | 5.822613  | 5.885434 | 5.847758 | 6.429017 | 0.00372  | -0.169   | 0.000916 | 0.000198 | 1.513359 | 12 |
| 8681_at | YOL107W        | 5.929183 | 6.282195 | 5.498635 | 5.982273 | 5.752761 | 6.248157 | 5.78426  | 6.104854 | 5.989772 | 5.596928 | 5.328611 | 6.081321 | 6.058224  | 5.703773 | 5.685373 | -0.0346  | 0.0717   | 0.329    | 0.034855 | 1.257372 | 17       |    |
| 8682_at | YOL106W        | 3.862409 | 4.199211 | 3.886549 | 4.167464 | 3.767582 | 4.63002  | 3.606237 | 3.895989 | 4.019852 | 3.50629  | 3.87763  | 3.923213 | 4.26678   | 4.139778 | 4.312025 | 3.899382 | 0.0308   | 0.0643   | 0.341    | 0.036071 | 1.222445 | 13 |
| 8683_at | YOL151W GRE2   | 6.872299 | 6.94418  | 7.161778 | 9.080576 | 9.121401 | 8.72423  | 9.748236 | 9.498729 | 9.305414 | 9.347504 | 9.282063 | 8.794871 | 8.436983  | 8.347374 | 8.487684 | 9.749596 | 0.328    | -0.556   | 2.46E-07 | 3.05E-07 | 6.505543 | 10 |
| 8684_at | YOL150C        | 5.922085 | 6.23866  | 7.043951 | 6.444496 | 6.752132 | 6.777122 | 6.63071  | 6.5776   | 6.71652  | 6.332797 | 6.563574 | 7.106445 | 6.068856  | 6.580219 | 6.516837 | 6.683662 | -0.00671 | -0.0783  | 0.35     | 0.036851 | 1.216848 | 13 |
| 8685_at | YOL149W DCP1   | 6.44488  | 5.955468 | 6.66358  | 5.769548 | 6.112432 | 5.40273  | 5.820996 | 5.58638  | 5.187798 | 6.012364 | 5.496343 | 5.513155 | 6.709471  | 6.035317 | 5.917538 | 5.558788 | -0.023   | 0.199    | 0.011    | 0.001693 | 1.679108 | 13 |
| 8686_at | YOL148C SPT20  | 5.408463 | 5.542623 | 6.274898 | 5.539427 | 5.47877  | 5.176313 | 5.601188 | 5.395433 | 5.109931 | 5.75295  | 5.344185 | 5.167282 | 6.022609  | 5.946988 | 6.672056 | 5.352319 | 0.0417   | 0.125    | 0.0332   | 0.004503 | 1.43154  | 13 |
| 8687_at | YOL147C PEX11  | 9.273453 | 9.150355 | 9.391527 | 9.939178 | 9.835083 | 9.822428 | 9.451996 | 9.353433 | 9.360773 | 9.687802 | 9.051376 | 9.263196 | 8.139482  | 8.494438 | 8.137735 | 9.393456 | -0.305   | -0.164   | 1.22E-05 | 5.58E-06 | 2.920971 | 16 |
| 8688_at | YOL146W PSF3   | 6.697301 | 6.479866 | 7.444882 | 6.568671 | 6.688359 | 6.614044 | 6.165181 | 5.941055 | 6.115605 | 6.265747 | 6.187194 | 6.374765 | 6.5623315 | 6.014083 | 5.986477 | 6.208978 | -0.247   | 0.047    | 0.00464  | 0.000801 | 1.505307 | 16 |
| 8689_at | YOL145C CTR9   | 4.012537 | 4.068129 | 5.0957   | 3.868543 | 3.742043 | 3.616129 | 3.834869 | 3.806543 | 3.461132 | 3.564181 | 3.619961 | 3.444815 | 3.293463  | 3.712864 | 3.187162 | 3.537267 | -0.242   | 0.0953   | 0.00369  | 0.000654 | 1.899635 | 16 |
| 8690_at | YOL144W NOP8   | 6.546269 | 6.772151 | 6.989668 | 6.128375 | 6.176758 | 5.971893 | 6.267273 | 6.264768 | 5.909691 | 5.949691 | 5.8258   | 5.4756   | 5.142967  | 5.416063 | 5.092267 | 5.852331 | -0.389   | 0.0352   | 2.51E-06 | 1.67E-06 | 2.800733 | 16 |
| 8691_at | YOL143C RIB4   | 8.892661 | 9.235901 | 9.936961 | 9.092532 | 9.032    |          |          |          |          |          |          |          |           |          |          |          |          |          |          |          |          |    |

|           |                |          |          |          |          |          |          |          |          |          |          |          |          |          |          |          |          |          |          |          |          |          |    |
|-----------|----------------|----------|----------|----------|----------|----------|----------|----------|----------|----------|----------|----------|----------|----------|----------|----------|----------|----------|----------|----------|----------|----------|----|
| 8780_at   | YNR068C        | 5.10229  | 4.96204  | 4.176776 | 5.63505  | 5.446973 | 5.383499 | 5.606203 | 5.584634 | 6.750031 | 6.315397 | 6.507008 | 6.741194 | 5.927643 | 5.691807 | 5.741639 | 6.363465 | 0.303    | -0.307   | 0.000356 | 8.79E-05 | 3.424663 | 10 |
| 8781_at   | YNR069C_BSC5   | 3.837727 | 3.594499 | 3.075504 | 3.623805 | 3.690376 | 3.64525  | 3.937125 | 3.727411 | 4.404727 | 3.738848 | 4.210801 | 3.612491 | 3.789949 | 3.905788 | 3.491437 | 3.906533 | 0.0578   | -0.0817  | 0.199    | 0.022247 | 1.337212 | 13 |
| 8782_at   | YNR070W        | 4.027984 | 3.804576 | 3.052719 | 3.657897 | 3.783628 | 4.116881 | 3.560318 | 3.578246 | 3.835598 | 3.758828 | 3.86704  | 3.507414 | 3.838856 | 3.92974  | 3.835673 | 3.747595 | 0.0465   | 0.0035   | 0.68     | 0.067157 | 1.131248 | 13 |
| 8783_at   | YNR071C        | 5.58954  | 5.239987 | 4.560486 | 5.96677  | 7.162953 | 7.82668  | 7.597477 | 7.596288 | 7.669622 | 7.411685 | 7.578586 | 7.697528 | 7.758032 | 7.638793 | 7.837635 |          | 0.595    | -0.382   | 4.39E-06 | 2.54E-06 | 6.560337 | 10 |
| 8784_s_at | YNR073C        | 6.143643 | 5.616774 | 5.637777 | 6.560063 | 6.628102 | 6.377078 | 7.255896 | 7.103669 | 7.282093 | 6.997027 | 6.904498 | 7.124435 | 7.020519 | 7.176018 | 6.67481  | 7.114537 | 0.285    | -0.203   | 0.000115 | 3.42E-05 | 2.586911 | 9  |
| 8785_at   | YNR074C_AIF1   | 6.303896 | 6.23174  | 5.462574 | 6.18574  | 6.029696 | 6.559172 | 6.756741 | 6.614598 | 6.626402 | 7.99684  | 7.343189 | 7.001878 | 6.966792 | 6.868256 | 6.452027 | 6.893169 | 0.296    | -0.155   | 0.021    | 0.002994 | 2.342535 | 9  |
| 8786_f_at | YNR076W_PAU6   | 11.44661 | 11.57757 | 12.13444 | 11.68336 | 11.57767 | 11.57638 | 10.64063 | 10.56803 | 11.4399  | 10.4788  | 11.10138 | 11.83353 | 11.36323 | 11.61489 | 11.66203 | 11.10659 | -0.0592  | 0.15     | 0.145    | 0.016725 | 1.581973 | 13 |
| 8787_at   | YNR032C_HUB1   | 8.418054 | 8.47565  | 8.876067 | 9.051028 | 8.873982 | 9.542967 | 8.73721  | 8.62097  | 8.807933 | 8.154148 | 8.570247 | 8.800914 | 7.457239 | 7.742661 | 7.676148 | 8.753259 | -0.282   | -0.17    | 0.000139 | 3.99E-05 | 2.425085 | 15 |
| 8788_at   | YNR034W-a      | 8.669255 | 8.339374 | 8.844838 | 10.80923 | 10.80983 | 11.14271 | 10.79233 | 10.84255 | 11.02925 | 10.78514 | 10.71409 | 10.93559 | 11.10351 | 11.12093 | 11.26508 | 11.19519 | 0.558    | -0.342   | 2.73E-05 | 1.06E-05 | 5.618982 | 10 |
| 8789_s_at | YNL239W_LAP3   | 7.818024 | 7.971479 | 7.896786 | 8.129516 | 7.978211 | 8.392904 | 8.320749 | 8.144695 | 8.642662 | 7.55714  | 7.981896 | 8.658748 | 7.434283 | 7.668909 | 7.8074   | 8.227283 | -0.0811  | -0.126   | 0.0281   | 0.003877 | 1.536199 | 12 |
| 8790_s_at | YNL044W_YIP3   | 8.134627 | 8.239354 | 8.133305 | 7.928511 | 8.069292 | 7.917993 | 7.7137   | 7.661961 | 7.502928 | 8.565754 | 8.33296  | 8.501753 | 9.149896 | 8.787474 | 9.163409 | 8.054457 | 0.264    | 0.148    | 8.65E-05 | 2.70E-05 | 2.239093 | 8  |
| 8800_at   | YNR042W        | 5.445184 | 5.3117   | 5.145351 | 5.089117 | 5.192789 | 5.494807 | 5.087788 | 5.08529  | 5.411491 | 5.036987 | 5.282114 | 4.7181   | 4.895615 | 4.779235 | 4.876684 | 5.110359 | -0.126   | -0.00836 | 0.0127   | 0.001921 | 1.397669 | 16 |
| 8801_at   | YNR043W_MVD1   | 10.26762 | 10.05402 | 9.500893 | 11.01687 | 10.77923 | 10.29929 | 10.88354 | 10.81483 | 10.8838  | 10.66654 | 11.0329  | 10.91495 | 8.963774 | 9.178225 | 8.885028 | 10.91365 | -0.222   | -0.396   | 6.06E-07 | 5.91E-07 | 3.647563 | 15 |
| 8802_at   | YNR044W_AGA1   | 5.691925 | 5.810941 | 5.318018 | 5.827925 | 5.592971 | 5.487164 | 5.856626 | 6.043664 | 5.176255 | 7.123327 | 6.966715 | 6.490532 | 7.093877 | 7.269436 | 6.57395  | 6.232044 | 0.434    | 0.00896  | 0.000999 | 0.000213 | 3.162334 | 7  |
| 8803_at   | YNR045W_PET494 | 6.343448 | 6.483631 | 6.455993 | 6.782846 | 6.787189 | 6.678144 | 6.89689  | 6.505329 | 6.602621 | 6.908443 | 6.364219 | 6.702646 | 6.320663 | 6.444271 | 6.621507 | 6.718593 | -0.00258 | -0.0727  | 0.0594   | 0.007576 | 1.195451 | 13 |
| 8804_at   | YNR046W_TRM112 | 8.319335 | 8.55987  | 8.920413 | 8.222266 | 8.182548 | 8.469769 | 7.569592 | 7.88127  | 7.452805 | 7.365341 | 7.636099 | 7.643691 | 6.724909 | 7.065885 | 6.960378 | 7.638724 | -0.441   | 0.0365   | 1.02E-05 | 4.83E-06 | 3.214994 | 16 |
| 8805_at   | YNR047W        | 3.959054 | 4.030368 | 3.926179 | 4.296588 | 4.007772 | 4.075995 | 4.019452 | 4.330496 | 4.090918 | 4.37149  | 4.400199 | 5.186399 | 4.962929 | 5.775813 | 5.228458 | 4.415235 | 0.365    | 0.0628   | 6.53E-05 | 2.15E-05 | 2.629624 | 7  |
| 8806_at   | YNR048W        | 5.893497 | 5.910502 | 6.007346 | 6.212667 | 6.323352 | 5.745637 | 6.226608 | 6.955494 | 4.565078 | 6.042736 | 5.639653 | 6.136425 | 6.198071 | 5.909596 | 5.726948 | 5.962446 | -0.00791 | -0.00369 | 0.984    | 0.093631 | 1.02298  | 13 |
| 8807_at   | YNR049C_MSO1   | 7.198157 | 7.735383 | 8.026699 | 7.821908 | 7.778805 | 7.847617 | 7.585714 | 7.945194 | 7.985191 | 7.973434 | 7.831208 | 7.310242 | 8.831827 | 8.760364 | 7.690154 | 7.737175 | 0.134    | 0.0542   | 0.119    | 0.01403  | 1.446471 | 13 |
| 8808_at   | YNR050C_LYS9   | 9.908759 | 10.20787 | 10.82837 | 9.815277 | 9.187268 | 9.301241 | 8.733412 | 7.441703 | 7.864724 | 6.52809  | 5.849034 | 6.631261 | 6.831516 | 6.812944 | 6.876747 | 7.127356 | -1.01    | 0.415    | 1.46E-06 | 1.13E-06 | 14.66808 | 20 |
| 8809_at   | YNR051C_BRE5   | 7.249756 | 7.997748 | 9.022081 | 8.0105   | 7.982229 | 7.604648 | 7.86056  | 8.355103 | 7.837175 | 8.320767 | 8.395484 | 8.820569 | 8.627646 | 8.619196 | 8.301678 | 8.129569 | 0.254    | 0.0885   | 0.0402   | 0.005345 | 1.960527 | 8  |
| 8810_at   | YNR052C_POP2   | 8.706741 | 8.750525 | 9.054617 | 8.618208 | 8.729238 | 8.307425 | 8.257367 | 8.32726  | 8.107125 | 8.090314 | 7.875285 | 7.518029 | 7.186056 | 7.245053 | 7.144602 | 8.038511 | -0.441   | -0.00403 | 2.46E-07 | 3.05E-07 | 3.216893 | 16 |
| 8811_at   | YNR053C_NOG2   | 9.80574  | 9.728203 | 9.097289 | 8.902643 | 9.253331 | 8.286564 | 8.882532 | 9.178143 | 8.279914 | 8.961845 | 8.247032 | 7.739344 | 7.60294  | 7.435375 | 7.260898 | 8.466648 | -0.533   | 0.00827  | 0.000135 | 3.91E-05 | 4.104708 | 18 |
| 8812_at   | YNR053C_NOG2   | 7.861279 | 7.05666  | 6.176455 | 5.975482 | 5.803028 | 5.15981  | 6.128739 | 7.248021 | 6.115301 | 5.971475 | 5.458481 | 4.662209 | 4.76074  | 4.546428 | 4.179264 | 5.674729 | -0.621   | 0.0117   | 0.00241  | 0.000452 | 5.184027 | 18 |
| 8813_at   | YNR054C_ESF2   | 6.979344 | 7.159849 | 7.704548 | 6.386193 | 6.734442 | 6.278509 | 6.757743 | 6.393136 | 6.878177 | 7.671784 | 5.906034 | 5.487391 | 5.367014 | 5.94056  | 4.838553 | 6.096757 | -0.46    | 0.0674   | 0.000627 | 0.000143 | 3.850561 | 16 |
| 8814_at   | YNR055C_HOL1   | 8.596965 | 8.472349 | 8.065107 | 8.61212  | 8.518428 | 8.289916 | 8.948169 | 8.661024 | 8.363466 | 8.567159 | 8.527491 | 8.676447 | 7.779888 | 7.76736  | 7.685521 | 8.595217 | -0.147   | -0.149   | 0.000192 | 5.26E-05 | 1.817301 | 15 |
| 8815_at   | YNR056C_BIO5   | 8.056476 | 7.650047 | 7.488489 | 8.751991 | 8.858102 | 8.137957 | 8.407485 | 8.185212 | 8.509157 | 6.586104 | 6.836063 | 7.044951 | 5.765803 | 5.891733 | 5.906689 | 7.790618 | -0.611   | -0.259   | 6.92E-05 | 2.26E-05 | 5.489653 | 17 |
| 8816_at   | YNR057C_BIO4   | 8.316843 | 7.753924 | 8.615163 | 8.825898 | 8.979782 | 8.793439 | 7.225668 | 6.897991 | 7.397347 | 5.994981 | 5.728024 | 6.215181 | 5.36644  | 6.178829 | 5.894353 | 6.949722 | -0.793   | 0.0477   | 0.000977 | 0.000209 | 8.182637 | 10 |
| 8817_at   | YNR058W_BIO4   | 10.29977 | 9.606844 | 9.471337 | 10.36957 | 10.16288 | 10.30042 | 9.79363  | 9.413362 | 9.892449 | 7.448451 | 7.629392 | 7.990646 | 7.045203 | 7.451574 | 7.463582 | 8.957133 | -0.82    | -0.0869  | 0.000307 | 7.75E-05 | 8.797601 | 16 |
| 8818_at   | YNR059W_MNT4   | 6.731291 | 6.698762 | 6.816524 | 6.031836 | 6.161898 | 5.913776 | 6.024105 | 6.272222 | 5.685167 | 5.71519  | 5.642352 | 5.826821 | 6.360092 | 5.820682 | 5.422407 | 6.688399 | -0.296   | 0.122    | 5.4E-06  | 2.96E-06 | 2.193593 | 14 |
| 8819_at   | YNR060W_FRE4   | 5.478535 | 5.421752 | 5.874081 | 5.813063 | 5.687446 | 5.728361 | 5.960035 | 5.835478 | 5.571469 | 5.929146 | 5.862389 | 6.085943 | 5.381626 | 5.773166 | 5.513913 | 5.875347 | 0.0073   | -0.0843  | 0.0376   | 0.005029 | 1.240532 | 13 |
| 8820_at   | YNR061C        | 9.180989 | 8.983905 | 8.322964 | 8.022353 | 7.66825  | 7.177407 | 8.41332  | 7.983268 | 7.974608 | 7.883958 | 7.775232 | 7.366997 | 6.394753 | 6.42464  | 6.188218 | 7.699832 | -0.597   | -0.0416  | 6.97E-06 | 3.60E-06 | 4.87054  | 18 |
| 8821_at   | YNR062C        | 3.779798 | 3.647924 | 4.537603 | 3.382349 | 3.521179 | 3.697755 | 3.8244   | 3.56744  | 3.425981 | 3.618528 | 3.534504 | 3.281942 | 3.533729 | 3.501196 | 3.279745 | 3.469183 | -0.13    | 0.0646   | 0.0392   | 0.005214 | 1.440867 | 16 |
| 8822_at   | YNR063W        | 3.712006 | 3.651673 | 3.948406 | 3.346016 | 3.441118 | 3.334965 | 4.040679 | 4.044771 | 3.792057 | 3.958709 | 4.046566 | 3.533252 | 3.436273 | 3.441605 | 3.522228 | 3.752183 | -0.0416  | -0.045   | 0.435    | 0.004903 | 1.915714 | 13 |
| 8823_at   | YNR020C_ATP23  | 6.922775 | 7.231823 | 7.61909  | 7.413583 | 7.990776 | 6.793999 | 7.57296  | 7.295673 | 6.980984 | 6.917174 | 6.481742 | 6.4522   | 6.73576  | 6.627055 | 6.562143 | 7.009566 | -0.231   | -0.0194  | 0.0332   | 0.004501 | 1.845004 | 16 |
| 8824_at   | YNR021W        | 7.672914 | 7.901407 | 8.108837 | 6.941078 | 7.041452 | 6.707251 | 6.4886   | 6.186228 | 6.066552 | 4.733623 | 4.965987 | 4.944393 | 4.293686 | 4.623225 | 4.430537 | 5.557687 | -0.959   | 0.178    | 6.08E-09 | 2.87E-08 | 12.71424 | 20 |
| 8825_at   | YNR022C_MRPL50 | 5.506059 | 5.687889 | 7.249904 | 6.313991 | 6.31645  | 6.15265  | 6.587873 | 6.081725 | 5.937673 | 6.388219 | 5.643701 | 6.272996 | 4.753393 | 5.099404 | 4.684915 | 6.156349 | -0.323   | -0.182   | 0.00291  | 0.00053  | 2.687221 | 15 |
| 8826_at   | YNR023W_SNF12  | 5.532829 | 5.388946 | 6.388479 | 5.531342 | 5.541804 | 5.126192 | 5.528683 | 5.425845 | 4.971938 | 5.658601 | 5.324785 | 5.326254 | 5.263216 | 5.572313 | 5.001986 | 5.338299 | -0.0856  | 0.0375   | 0.382    | 0.039919 | 1.256585 | 13 |
| 8827_at   | YNR024W        | 6.995724 | 7.1586   | 7.842468 | 6.891723 | 6.651051 | 6.493725 | 6.969944 | 7.203025 | 6.340981 | 7.615582 | 6.536965 | 6.479728 | 6.782137 | 6.389811 | 6.032255 | 6.740042 | -0.52    | 0.0285   | 0.115    | 0.013641 | 7.00596  | 16 |
| 8828_at   | YNR025C        | 6.209426 | 6.195498 | 6.838499 | 6.128271 | 6.225979 | 5.845313 | 6.109366 | 5.926249 | 5.779579 | 6.134052 | 6.072992 | 5.365605 | 6.100085 | 6.07592  | 5.772888 | 5.872748 | -0.112   | 0.0894   | 0.0471   | 0.006153 | 1.845552 | 14 |
| 8829_at   | YNR026C_SEC12  | 6.635187 | 6.649624 | 6.400894 | 6.091954 | 6.128861 | 5.588487 | 6.147173 | 6.105274 | 5.865626 | 5.703266 | 5.469829 | 5.134032 | 4.413569 | 4.783344 | 4.199178 | 5.672744 | -0.54    | -0.0388  | 5.5E-07  | 4.46E-07 | 4.185257 | 10 |
| 8830_at   | YNR027W_BUD17  | 7.922488 | 7.888752 | 8.004    |          |          |          |          |          |          |          |          |          |          |          |          |          |          |          |          |          |          |    |

|           |          |       |          |          |          |          |           |          |          |          |          |          |          |          |          |          |          |          |         |          |          |          |          |         |    |
|-----------|----------|-------|----------|----------|----------|----------|-----------|----------|----------|----------|----------|----------|----------|----------|----------|----------|----------|----------|---------|----------|----------|----------|----------|---------|----|
| 8861_at   | YNR013C  | PHO91 | 7.294404 | 7.403733 | 7.106609 | 6.852158 | 6.682152  | 6.767284 | 6.90054  | 6.962659 | 6.32434  | 6.578057 | 6.703306 | 6.167665 | 6.595474 | 6.341201 | 6.586493 | -0.222   | 0.0614  | 0.000344 | 8.53E-05 | 1.799963 | 16       |         |    |
| 8862_at   | YNR014W  |       | 6.391492 | 5.991746 | 6.076302 | 6.932731 | 6.631259  | 6.744249 | 7.074125 | 8.056782 | 7.5309   | 7.680741 | 7.741616 | 7.829278 | 7.732758 | 7.848981 | 7.929207 | 7.61543  | 0.453   | -0.175   | 1.67E-05 | 7.06E-06 | 3.325502 | 7       |    |
| 8863_at   | YNR015W  | SMM1  | 5.785926 | 5.843565 | 5.903104 | 5.595482 | 5.749016  | 5.664398 | 5.896923 | 5.813389 | 5.575857 | 5.986918 | 5.342205 | 5.544395 | 6.352455 | 5.959994 | 5.632475 | 5.650468 | 0.0254  | 0.072    | 0.162    | 0.018475 | 1.232649 | 13      |    |
| 8864_at   | YNR016C  | ACC1  | 10.81385 | 11.02683 | 10.30507 | 11.58518 | 11.46578  | 11.44657 | 11.83229 | 11.96312 | 11.85329 | 12.12484 | 11.97498 | 12.27465 | 10.22687 | 11.66174 | 10.20372 | 12.06067 | 0.307   | -0.207   | 1.89E-06 | 1.36E-06 | 2.702807 | 9       |    |
| 8865_at   | YNR017W  | MAS6  | 9.177288 | 9.446734 | 9.263041 | 10.00253 | 9.806486  | 9.96548  | 9.763249 | 9.815113 | 9.629151 | 9.951906 | 9.809581 | 10.51427 | 9.232014 | 9.731877 | 9.997716 | 10.0131  | 0.096   | -0.145   | 0.00928  | 0.001455 | 1.658309 | 12      |    |
| 8866_at   | YNR018W  |       | 10.95275 | 10.55762 | 10.31541 | 11.44819 | 11.47588  | 11.05711 | 11.85052 | 11.683   | 11.78494 | 12.39321 | 12.12494 | 11.81193 | 10.52183 | 10.62598 | 10.70314 | 11.99079 | 0.0585  | -0.385   | 1.09E-05 | 5.06E-06 | 2.786081 | 11      |    |
| 8867_at   | YNR019W  | ARE2  | 7.150595 | 7.144333 | 6.372298 | 7.768585 | 7.252032  | 6.595992 | 8.005309 | 7.880769 | 7.220767 | 8.299612 | 8.254256 | 8.861246 | 7.002091 | 7.184153 | 7.091938 | 8.003981 | 0.142   | -0.289   | 0.0116   | 0.001768 | 2.527523 | 12      |    |
| 8868_at   | YNL027W  | CRZ1  | 5.945594 | 5.693235 | 5.303557 | 5.574794 | 5.649961  | 5.50724  | 5.717285 | 5.972705 | 5.646174 | 6.536476 | 6.070088 | 6.18433  | 7.48651  | 7.543371 | 6.991062 | 5.980031 | 0.455   | 0.139    | 3.58E-07 | 4.02E-07 | 3.344497 | 7       |    |
| 8869_at   | YNL026W  | SAM50 | 8.332364 | 8.34367  | 8.06566  | 8.210459 | 8.313988  | 8.07799  | 9.790857 | 7.839636 | 7.711104 | 7.484732 | 7.45135  | 7.189371 | 6.626209 | 6.720211 | 6.519817 | 7.638172 | -0.442  | -0.0528  | 6.3E-08  | 1.25E-07 | 3.222236 | 16      |    |
| 8870_at   | YNL025C  | SSN8  | 5.116404 | 5.09992  | 4.604484 | 4.911713 | 4.894528  | 4.992791 | 5.20273  | 5.084864 | 4.986699 | 4.928631 | 5.528514 | 5.010897 | 4.625741 | 4.786491 | 4.555224 | 5.08651  | -0.0522 | -0.0823  | 0.0488   | 0.006339 | 1.322212 | 13      |    |
| 8871_at   | YNL024C  |       | 9.512516 | 9.260834 | 9.334307 | 9.177162 | 9.375188  | 8.970709 | 9.244522 | 9.197455 | 8.957031 | 9.104458 | 9.174483 | 8.97861  | 8.036027 | 7.66552  | 8.012385 | 9.066454 | -0.351  | -0.121   | 1.34E-06 | 1.06E-06 | 2.5346   | 15      |    |
| 8872_at   | YNL023C  | FAP1  | 6.764377 | 6.812643 | 5.904732 | 6.419538 | 6.51979   | 6.263027 | 7.07961  | 6.923011 | 6.388503 | 7.360023 | 7.26701  | 7.269863 | 7.598558 | 7.802246 | 7.535649 | 6.963821 | 0.343   | 0.0222   | 0.000579 | 0.000133 | 2.482742 | 7       |    |
| 8873_at   | YNL022C  |       | 7.091407 | 6.760633 | 6.534424 | 6.717735 | 6.908312  | 6.195851 | 6.732741 | 7.166696 | 6.500806 | 6.788085 | 6.65296  | 6.167616 | 6.112176 | 6.626922 | 5.979358 | 6.614456 | -0.141  | -0.0286  | 0.00976  | 0.011787 | 1.454404 | 16      |    |
| 8874_at   | YNL021W  | HDA1  | 5.702541 | 5.753971 | 5.088891 | 5.391278 | 5.394646  | 5.171518 | 5.514797 | 5.916788 | 5.541702 | 5.990736 | 5.983422 | 5.40009  | 5.560666 | 5.303007 | 5.429763 | 5.632974 | 0.0151  | -0.0501  | 0.0574   | 0.057625 | 1.156538 | 13      |    |
| 8875_at   | YNL020C  | ARK1  | 3.146752 | 3.308332 | 3.677638 | 3.198264 | 3.120696  | 3.143953 | 3.270592 | 3.129708 | 3.203418 | 3.387829 | 3.285105 | 3.346763 | 3.523819 | 3.349293 | 3.55347  | 3.229299 | 0.042   | 0.0517   | 0.0473   | 0.006164 | 1.211035 | 13      |    |
| 8876_i_at | YNL017C  |       | 5.488416 | 5.875965 | 6.397167 | 6.145377 | 6.157061  | 6.07661  | 5.843421 | 5.639414 | 5.595739 | 5.733465 | 5.708689 | 5.078707 | 5.666997 | 5.852141 | 5.581038 | 5.698411 | -0.0972 | 0.0379   | 0.289    | 0.031058 | 1.293914 | 13      |    |
| 8877_r_at | YNL017C  |       | 3.737844 | 3.860891 | 4.536128 | 3.63762  | 4.110191  | 4.669043 | 3.783929 | 3.89491  | 3.694152 | 3.843138 | 3.851798 | 3.593326 | 3.456696 | 3.593135 | 3.953524 | 3.539128 | 3.66241 | -0.0842  | 0.0618   | 0.145    | 0.016802 | 1.32769 | 13 |
| 8878_s_at | YNL017C  |       | 3.729583 | 3.740407 | 4.78874  | 3.750471 | 3.77035   | 3.591327 | 3.732748 | 4.011503 | 3.653132 | 3.668233 | 4.113015 | 3.734901 | 3.788342 | 3.907134 | 3.656918 | 3.746642 | -0.0565 | 0.0481   | 0.454    | 0.046693 | 1.930244 | 13      |    |
| 8879_at   | YNL016W  | PUB1  | 9.744903 | 9.61021  | 9.239648 | 9.371494 | 8.603782  | 8.379993 | 8.969907 | 9.195237 | 8.891185 | 8.834505 | 9.221239 | 8.666809 | 9.038853 | 9.367109 | 8.120764 | 8.813232 | -0.259  | 0.0306   | 0.025    | 0.003496 | 1.282236 | 16      |    |
| 8880_at   | YNL015W  | PB12  | 9.661521 | 9.773557 | 10.00414 | 11.49736 | 11.42914  | 11.56236 | 11.7073  | 11.6516  | 11.70589 | 11.15536 | 11.76624 | 11.7845  | 10.99721 | 11.07328 | 11.344   | 11.83469 | 0.285   | -0.363   | 6.51E-06 | 3.43E-06 | 3.806803 | 10      |    |
| 8881_at   | YNL014W  | HEF3  | 7.014864 | 6.919638 | 7.395474 | 7.269416 | 7.115771  | 6.936267 | 7.543895 | 7.700913 | 7.332815 | 7.255347 | 7.955664 | 7.612884 | 7.189558 | 7.564764 | 7.359036 | 7.441198 | 0.0838  | -0.0588  | 0.104    | 0.012527 | 1.319347 | 13      |    |
| 8882_at   | YNL013C  |       | 5.049107 | 5.035689 | 6.503595 | 5.139389 | 4.970508  | 5.33278  | 5.293386 | 4.958336 | 4.844558 | 4.882422 | 5.159983 | 4.862986 | 4.950651 | 5.197741 | 5.103832 | 4.967467 | -0.112  | 0.0926   | 0.171    | 0.019413 | 1.498167 | 14      |    |
| 8883_at   | YNL012W  | SPO1  | 3.498724 | 3.118405 | 4.842841 | 4.294597 | 4.042587  | 3.375841 | 4.092248 | 4.095806 | 3.934591 | 3.805521 | 3.662759 | 4.267417 | 3.240336 | 3.142688 | 3.177969 | 3.957744 | -0.155  | -0.126   | 0.0682   | 0.008655 | 1.748074 | 15      |    |
| 8884_at   | YNL011C  |       | 6.006045 | 6.242289 | 6.716647 | 6.543577 | 6.4842    | 6.33956  | 6.978125 | 6.848863 | 6.627225 | 6.628393 | 6.397087 | 7.077878 | 6.108459 | 6.032748 | 6.140828 | 6.714731 | -0.0525 | -0.147   | 0.0081   | 0.001297 | 1.533097 | 12      |    |
| 8885_at   | YNL010W  |       | 9.29094  | 9.421783 | 9.538385 | 9.290261 | 9.417151  | 9.384758 | 9.266891 | 8.998632 | 9.132829 | 9.149872 | 8.811037 | 9.118774 | 7.793453 | 8.216614 | 7.773966 | 9.098399 | -0.375  | -0.114   | 2.47E-07 | 3.05E-07 | 2.70486  | 15      |    |
| 8886_at   | YNL009W  | IDP3  | 4.48457  | 4.372581 | 5.798678 | 4.927705 | 4.5161738 | 4.627329 | 5.76425  | 5.001882 | 5.377073 | 5.6423   | 5.570345 | 6.63265  | 5.232668 | 5.378697 | 5.477063 | 5.448411 | 0.169   | -0.0963  | 0.114    | 0.013488 | 1.656567 | 9       |    |
| 8887_at   | YNL008C  | AS13  | 7.545548 | 7.692685 | 8.051433 | 7.754485 | 7.749172  | 7.687909 | 7.689099 | 7.397895 | 7.620598 | 7.006744 | 7.269459 | 7.66397  | 8.583326 | 8.516448 | 8.363206 | 7.492564 | 0.14    | 0.179    | 0.00104  | 0.00022  | 1.922683 | 8       |    |
| 8888_at   | YNL007C  | SIS1  | 8.615513 | 8.847037 | 9.398569 | 8.812007 | 8.596048  | 8.423629 | 8.249916 | 7.85008  | 8.285434 | 8.635905 | 8.314594 | 8.196387 | 11.41430 | 10.72477 | 11.38912 | 8.321818 | 0.526   | 0.486    | 3.49E-07 | 3.95E-07 | 7.57322  | 5       |    |
| 8889_at   | YNL006W  | LSR8  | 8.753985 | 8.326952 | 8.156585 | 8.319852 | 8.20751   | 8.028819 | 8.556081 | 8.331953 | 8.116251 | 8.367025 | 8.215744 | 7.837816 | 8.681392 | 8.566437 | 8.689992 | 8.199263 | 0.0643  | 0.0984   | 0.0277   | 0.003834 | 1.401076 | 13      |    |
| 8890_at   | YNL005C  | MRP7  | 7.530801 | 7.686878 | 7.74889  | 7.699749 | 7.574794  | 7.898663 | 8.374345 | 7.977725 | 8.139279 | 8.207467 | 8.041111 | 8.218849 | 7.651531 | 7.480832 | 7.669181 | 8.056132 | 0.0039  | -0.122   | 0.0133   | 0.001991 | 1.351369 | 12      |    |
| 8891_at   | YNL0051W | COG5  | 6.563286 | 6.731477 | 7.073867 | 6.65892  | 6.511424  | 6.106774 | 6.280743 | 6.082408 | 6.136212 | 5.965997 | 5.706011 | 5.852106 | 5.263974 | 5.052818 | 5.057554 | 5.988331 | -0.433  | -0.00779 | 2.46E-07 | 3.05E-07 | 3.15546  | 16      |    |
| 8892_at   | YNL0050C |       | 5.58992  | 6.165354 | 7.080039 | 6.109986 | 5.932115  | 5.608984 | 6.208386 | 6.235067 | 5.719502 | 6.345807 | 5.930394 | 5.852509 | 5.708607 | 5.584445 | 5.622334 | 5.954162 | -0.137  | -0.0037  | 0.238    | 0.026096 | 1.439036 | 16      |    |
| 8893_at   | YNL049C  | SFB2  | 6.440074 | 6.695485 | 7.237248 | 5.717796 | 5.645954  | 5.694665 | 6.148591 | 5.742099 | 5.694731 | 5.507251 | 5.661727 | 5.265193 | 4.931037 | 5.253176 | 4.829839 | 5.577269 | -0.453  | 0.0856   | 3.37E-05 | 1.25E-05 | 3.320976 | 16      |    |
| 8894_at   | YNL048W  | ALG11 | 8.779635 | 8.655631 | 8.892131 | 8.477354 | 8.546506  | 8.12398  | 8.474769 | 8.717004 | 8.064061 | 8.182827 | 7.968378 | 8.075324 | 7.14107  | 7.480711 | 6.840696 | 8.029115 | -0.402  | -0.0185  | 7.78E-06 | 3.92E-06 | 2.901532 | 16      |    |
| 8895_at   | YNL047C  | SLM2  | 4.701369 | 4.865914 | 6.077705 | 4.906139 | 4.911197  | 4.805223 | 5.07777  | 4.880234 | 4.836578 | 4.907875 | 4.81228  | 4.937651 | 4.568164 | 4.751297 | 4.595269 | 4.847639 | -0.132  | 0.0187   | 0.167    | 0.019057 | 1.419298 | 16      |    |
| 8896_at   | YNL046W  |       | 8.550576 | 8.237206 | 8.643338 | 8.749099 | 8.615499  | 8.667984 | 7.768004 | 8.074337 | 7.818584 | 7.197    | 7.532726 | 7.677884 | 6.263098 | 6.825709 | 6.785835 | 7.825874 | -0.526  | -0.0657  | 0.00001  | 4.75E-06 | 4.09399  | 18      |    |
| 8897_at   | YNL045W  |       | 7.786414 | 7.548018 | 8.113612 | 7.730679 | 7.868608  | 8.143526 | 8.325983 | 8.068934 | 8.068126 | 7.753758 | 7.787474 | 8.491477 | 8.076981 | 8.312078 | 8.352135 | 8.0908   | 0.0964  | -0.0154  | 0.187    | 0.021039 | 1.291069 | 13      |    |
| 8898_at   | YNL043C  |       | 3.997414 | 4.432028 | 4.83113  | 3.958663 | 4.237519  | 4.047753 | 4.236874 | 3.848721 | 3.858141 | 4.103979 | 4.276832 | 4.375827 | 4.477477 | 5.235954 | 5.318811 | 4.089117 | 0.164   | 0.171    | 0.00144  | 0.00029  | 1.96594  | 8       |    |
| 8899_at   | YNL042W  | BOP3  | 5.105908 | 4.784887 | 5.517387 | 5.057013 | 5.006276  | 4.827423 | 5.457862 | 5.647586 | 5.22355  | 5.760765 | 5.429219 | 5.672266 | 5.677674 | 5.916851 | 5.5551   | 5.442787 | 0.187   | -0.0115  | 0.0181   | 0.002617 | 1.642792 | 13      |    |
| 8900_at   | YNL041C  | COG6  | 4.595768 | 4.566237 | 5.058868 | 4.066428 | 4.509783  | 3.952506 | 4.72873  | 4.188433 | 4.179169 | 4.51277  | 4.080226 | 4.129855 | 3.924939 | 3.98572  | 3.849939 | 4.191213 | -0.186  | 0.0329   | 0.0144   | 0.002143 | 1.635442 | 16      |    |
| 8901_at   | YNL040W  |       | 5.828937 | 5.353785 | 6.011738 | 5.386862 | 5.193167  | 5.199899 | 5.577672 | 5.454784 | 5.401902 | 5.59483  | 5.665326 | 5.621718 | 5.505273 | 5        |          |          |         |          |          |          |          |         |    |

|         |               |          |          |            |          |          |          |          |          |           |          |          |          |           |          |          |          |         |          |          |          |          |    |
|---------|---------------|----------|----------|------------|----------|----------|----------|----------|----------|-----------|----------|----------|----------|-----------|----------|----------|----------|---------|----------|----------|----------|----------|----|
| 8933_at | YNL054W VAC7  | 7.395071 | 7.537154 | 7.30308    | 7.580059 | 7.466725 | 7.302509 | 7.979491 | 7.760183 | 7.627817  | 7.988505 | 8.072525 | 7.862146 | 8.330434  | 8.176381 | 7.975646 | 7.832563 | 0.214   | -0.0166  | 0.000162 | 4.54E-05 | 1.761787 | 9  |
| 8934_at | YNL053W MSG5  | 5.94132  | 6.138594 | 6.272461   | 6.199812 | 6.285558 | 6.182589 | 6.553712 | 6.632865 | 6.047396  | 6.767302 | 6.538231 | 6.454059 | 6.918271  | 6.892176 | 6.445189 | 6.481845 | 0.175   | -0.0143  | 0.00347  | 0.00662  | 1.588968 | 13 |
| 8935_at | YNL052W CXX5  | 8.179513 | 7.709315 | 7.528849   | 10.14115 | 9.937365 | 9.191452 | 10.58937 | 10.62476 | 10.65868  | 10.80006 | 10.88415 | 11.18475 | 9.665218  | 9.431253 | 9.317812 | 10.90134 | 0.444   | -0.623   | 4.36E-08 | 1.00E-07 | 9.24155  | 10 |
| 8936_at | YNL096C RPS7B | 10.75063 | 10.70825 | 10.48923   | 10.03133 | 9.993723 | 10.04252 | 9.778368 | 9.733473 | 9.630013  | 9.637655 | 9.533606 | 9.129615 | 9.157286  | 8.72646  | 9.213265 | 9.532604 | -0.417  | 0.0847   | 2.62E-07 | 3.00E-07 | 3.01949  | 16 |
| 8937_at | YNL095C       | 6.404849 | 6.431677 | 5.901348   | 6.252257 | 6.34343  | 6.278086 | 6.722713 | 6.751524 | 6.829625  | 6.335945 | 6.341148 | 6.195365 | 5.520515  | 6.029227 | 5.618483 | 6.446646 | -0.138  | -0.129   | 0.00167  | 0.00033  | 1.7065   | 15 |
| 8938_at | YNL094W APP1  | 6.442593 | 6.573237 | 6.374701   | 6.763942 | 6.824068 | 6.675833 | 6.950702 | 6.665474 | 6.747908  | 6.506262 | 6.652123 | 6.772558 | 6.568633  | 6.765788 | 6.771186 | 6.803214 | 0.0499  | -0.0588  | 0.0638   | 0.008077 | 1.249351 | 13 |
| 8939_at | YNL093W YPT53 | 2.627447 | 2.590475 | 2.682125   | 2.793037 | 2.916641 | 2.670767 | 3.199295 | 3.139965 | 2.943934  | 3.7416   | 3.854919 | 3.667156 | 3.934259  | 3.94469  | 4.605062 | 3.387286 | 0.437   | -0.00252 | 2.57E-06 | 1.70E-06 | 3.184493 | 7  |
| 8940_at | YNL092W       | 5.235752 | 5.053292 | 5.198145   | 6.560427 | 6.420489 | 6.780071 | 6.912204 | 6.857381 | 6.953335  | 7.102756 | 7.600183 | 7.86274  | 6.683434  | 6.823617 | 7.276109 | 7.338449 | 0.47    | -0.355   | 4.54E-08 | 1.03E-07 | 5.024779 | 10 |
| 8941_at | YNL091W NST1  | 5.59108  | 5.818624 | 6.526728   | 6.431133 | 6.076289 | 6.26509  | 6.530667 | 6.579681 | 6.440579  | 7.217813 | 7.158239 | 7.739858 | 7.37391   | 7.132502 | 7.604446 | 6.916336 | 0.418   | -0.0727  | 0.000184 | 5.06E-05 | 3.027178 | 7  |
| 8942_at | YNL090W RHO2  | 7.358828 | 7.340925 | 7.160297   | 6.526338 | 6.613913 | 6.436286 | 6.327822 | 6.137587 | 6.062004  | 6.336673 | 6.078225 | 5.619752 | 7.077672  | 6.690979 | 6.122059 | 6.055415 | -0.179  | 0.249    | 0.00014  | 4.01E-05 | 2.435751 | 14 |
| 8943_at | YNL089C       | 4.116295 | 4.043416 | 4.112554   | 3.706697 | 3.699723 | 3.797579 | 3.683497 | 3.753771 | 3.818658  | 3.77976  | 4.312926 | 3.703328 | 3.902805  | 4.178885 | 3.563604 | 3.781211 | -0.0267 | 0.026    | 0.334    | 0.035339 | 1.185563 | 13 |
| 8944_at | YNL088W TOP2  | 6.278113 | 6.551529 | 6.717462   | 6.262895 | 6.333121 | 6.075602 | 6.978706 | 6.61487  | 6.6247248 | 6.527928 | 6.760787 | 6.880426 | 6.300792  | 6.469942 | 6.47965  | 6.706018 | 0.044   | -0.0757  | 0.439    | 0.045354 | 1.28902  | 13 |
| 8945_at | YNL087W TCB2  | 6.254111 | 6.437082 | 6.162684   | 6.219521 | 6.336437 | 5.964914 | 6.215213 | 6.184349 | 5.881744  | 6.117576 | 6.036476 | 6.237809 | 6.41769   | 6.345293 | 5.934834 | 6.109265 | -0.0119 | 0.0411   | 0.355    | 0.037339 | 1.125895 | 13 |
| 8946_at | YNL086W       | 6.550205 | 6.732981 | 7.328214   | 6.588256 | 6.624815 | 6.903252 | 6.59733  | 6.539679 | 6.347255  | 6.482435 | 6.294073 | 6.486466 | 6.927386  | 6.59756  | 6.21031  | 6.417197 | -0.086  | 0.0714   | 0.105    | 0.01257  | 1.364963 | 13 |
| 8947_at | YNL085W MKT1  | 7.506132 | 7.522493 | 7.161339   | 7.124058 | 7.159077 | 6.624165 | 7.421744 | 7.303911 | 7.250738  | 7.152583 | 7.412301 | 7.562818 | 6.724627  | 6.465554 | 6.62181  | 7.217837 | -0.156  | -0.0679  | 0.026    | 0.00319  | 1.549191 | 16 |
| 8948_at | YNL084C       | 6.435542 | 6.36934  | 6.934964   | 6.040355 | 5.952017 | 5.351324 | 6.266928 | 5.915549 | 5.832081  | 6.129241 | 5.847114 | 5.555635 | 7.43441   | 6.820471 | 4.925998 | 5.760914 | -0.404  | -0.0238  | 0.000204 | 5.51E-05 | 2.916579 | 16 |
| 8949_at | YNL083W SAL1  | 7.225164 | 7.135399 | 6.743605   | 7.178622 | 7.1259   | 6.338867 | 7.461629 | 7.63885  | 7.279838  | 7.211225 | 7.749898 | 7.232307 | 7.344985  | 6.96368  | 6.777931 | 7.273567 | 0.021   | -0.073   | 0.421    | 0.043626 | 1.234027 | 13 |
| 8950_at | YNL082W PMS1  | 5.176211 | 5.059776 | 6.074384   | 5.130995 | 5.231482 | 4.663944 | 5.386713 | 5.180746 | 4.663004  | 5.744438 | 6.841132 | 5.635128 | 5.994899  | 5.763546 | 4.98806  | 5.465149 | 0.136   | 0.00126  | 0.537    | 0.05424  | 1.434149 | 13 |
| 8951_at | YNL081C SWS2  | 7.319123 | 7.288672 | 8.080962   | 8.202116 | 8.433321 | 8.260968 | 8.62349  | 8.118363 | 8.069402  | 7.771295 | 7.98977  | 8.221574 | 7.372859  | 6.562753 | 7.787015 | 8.224544 | -0.0369 | -0.174   | 0.0114   | 0.001747 | 1.59048  | 12 |
| 8952_at | YNL080C EPM1  | 6.813856 | 6.974751 | 7.04058    | 7.071155 | 6.754872 | 6.833077 | 7.068894 | 6.978692 | 6.707743  | 7.29446  | 7.1547   | 7.906509 | 7.981095  | 7.79486  | 7.601925 | 7.138269 | 0.254   | 0.0599   | 0.000628 | 0.000143 | 1.961733 | 8  |
| 8953_at | YNL079C TSM1  | 9.827203 | 9.671571 | 9.96312    | 9.402872 | 9.467458 | 9.478849 | 9.649949 | 9.27416  | 9.36186   | 9.291682 | 8.953105 | 8.741852 | 8.040981  | 8.783951 | 7.768319 | 9.154808 | -0.494  | -0.085   | 1.59E-08 | 5.06E-08 | 3.702568 | 17 |
| 8954_at | YNL078W NIS1  | 6.271089 | 6.024779 | 6.579649   | 6.110659 | 6.039963 | 5.745263 | 5.976551 | 5.704818 | 5.796798  | 5.950464 | 5.968772 | 6.012585 | 6.576642  | 7.16602  | 6.854264 | 5.888321 | 0.147   | 0.19     | 3.52E-05 | 1.30E-05 | 1.993391 | 8  |
| 8955_at | YNL077W APJ1  | 5.313432 | 5.054372 | 5.345864   | 5.790505 | 5.729222 | 5.563842 | 6.321506 | 6.381019 | 6.301125  | 7.400649 | 7.089003 | 7.512033 | 9.416265  | 9.369188 | 9.628804 | 6.759796 | 1.13    | 0.156    | 3.17E-12 | 6.50E-10 | 20.02784 | 3  |
| 8956_at | YNL076W MKS1  | 5.388782 | 5.884881 | 6.302461   | 5.771604 | 5.750929 | 6.562989 | 6.010148 | 5.930364 | 5.842327  | 6.664544 | 6.318522 | 6.666705 | 9.113404  | 8.999074 | 8.828749 | 6.214443 | 0.81    | 0.33     | 2.88E-10 | 6.16E-09 | 9.303375 | 5  |
| 8957_at | YNL075W IMP4  | 7.25874  | 7.460012 | 7.568876   | 6.907006 | 6.804957 | 6.711037 | 6.874607 | 6.95542  | 6.691702  | 7.04428  | 6.743515 | 6.117718 | 9.206938  | 8.661373 | 8.055769 | 6.689868 | 0.281   | 0.371    | 1.89E-05 | 7.80E-06 | 3.81154  | 8  |
| 8958_at | YNL074C MLF3  | 5.68683  | 5.644079 | 5.831802   | 6.177141 | 6.548962 | 6.056778 | 6.862209 | 6.494966 | 6.594712  | 7.674825 | 7.193429 | 8.022185 | 7.291149  | 7.366918 | 7.96944  | 7.04515  | 0.554   | -0.125   | 6.13E-05 | 2.04E-05 | 4.346961 | 7  |
| 8959_at | YNL117W MLS1  | 7.360268 | 7.167025 | 7.323014   | 8.068177 | 7.992143 | 7.957455 | 8.796918 | 8.547571 | 8.753325  | 8.461757 | 8.249341 | 8.961515 | 8.141937  | 8.572993 | 8.43165  | 8.627331 | 0.277   | -0.219   | 7.52E-05 | 2.42E-05 | 2.654251 | 9  |
| 8960_at | YNL116W DMA2  | 5.082995 | 4.946228 | 5.853339   | 5.121177 | 5.35185  | 5.105978 | 5.694027 | 5.574983 | 5.283446  | 5.891844 | 5.978241 | 6.126463 | 6.5845725 | 6.315565 | 6.100981 | 6.589437 | 0.252   | -0.00352 | 0.000493 | 0.000084 | 1.949663 | 7  |
| 8961_at | YNL115C       | 5.101115 | 5.21676  | 5.937605   | 5.826134 | 5.771743 | 5.668537 | 6.919083 | 6.06926  | 6.569702  | 6.050962 | 6.08266  | 6.578259 | 6.665409  | 5.083396 | 5.321969 | 6.295201 | -0.0795 | -0.301   | 0.00129  | 0.000265 | 2.28995  | 12 |
| 8962_at | YNL114C       | 6.782046 | 6.760483 | 7.08042    | 6.085034 | 6.399901 | 5.921267 | 6.669828 | 6.299680 | 6.252428  | 6.183016 | 6.43839  | 6.147965 | 6.237472  | 6.311844 | 6.141413 | 6.188198 | -0.141  | 0.0925   | 0.00991  | 0.001543 | 1.568065 | 14 |
| 8963_at | YNL113W RPC19 | 9.333222 | 9.404313 | 9.553011   | 9.826311 | 9.170053 | 8.491174 | 8.64596  | 8.753576 | 8.309666  | 8.02526  | 8.801705 | 7.269296 | 7.615342  | 6.888716 | 6.149084 | 8.254056 | -0.731  | -0.0682  | 2.88E-06 | 1.85E-06 | 6.951141 | 18 |
| 8964_at | YNL112W DBP2  | 9.223385 | 8.665759 | 8.018063   | 7.494248 | 7.666638 | 6.265153 | 7.789629 | 8.473093 | 7.418682  | 8.010329 | 7.170486 | 6.721605 | 7.054172  | 7.03445  | 6.637884 | 7.371055 | -0.381  | 0.0954   | 0.0304   | 0.00416  | 2.74594  | 16 |
| 8965_at | YNL112W DBP2  | 9.797157 | 9.528973 | 9.302345   | 8.609519 | 8.912098 | 7.318521 | 8.610034 | 9.194395 | 8.160023  | 8.998943 | 8.263468 | 8.370678 | 8.956747  | 8.040809 | 7.663824 | 8.35204  | -0.353  | 0.092    | 0.021    | 0.002996 | 2.546483 | 12 |
| 8966_at | YNL111C CYB5  | 10.40749 | 10.40296 | 10.3792    | 10.74094 | 10.6227  | 10.66813 | 10.79127 | 10.66646 | 10.6199   | 11.06503 | 11.00937 | 11.32028 | 9.501678  | 9.773163 | 9.685795 | 10.9062  | -0.135  | -0.241   | 0.000048 | 1.67E-05 | 1.219495 | 16 |
| 8967_at | YNL110C NOP15 | 7.765157 | 7.585587 | 8.248431   | 7.389526 | 7.281102 | 6.699319 | 7.243415 | 7.269451 | 6.668866  | 7.156322 | 6.487423 | 6.127925 | 6.263186  | 6.218379 | 5.993348 | 6.735571 | -0.439  | 0.074    | 0.000103 | 3.14E-05 | 3.204279 | 16 |
| 8968_at | YNL109W       | 5.340896 | 5.282926 | 5.713557   | 5.203977 | 5.272535 | 4.993733 | 5.376783 | 4.979592 | 5.015515  | 5.22166  | 5.390867 | 5.036026 | 5.617273  | 5.743568 | 5.222965 | 5.136547 | 0.0304  | 0.0948   | 0.0292   | 0.004009 | 1.310209 | 13 |
| 8969_at | YNL108C       | 6.958292 | 6.938427 | 6.865598   | 6.429786 | 6.654522 | 6.318234 | 6.430567 | 6.112968 | 6.239788  | 6.309143 | 6.281331 | 6.345946 | 7.518167  | 7.00929  | 6.525503 | 6.265146 | 0.0226  | 0.194    | 0.000767 | 0.000169 | 1.635687 | 13 |
| 8970_at | YNL107W YAF9  | 8.184628 | 8.07532  | 8.08541    | 7.821804 | 7.994284 | 7.804428 | 8.009164 | 8.113782 | 7.770508  | 8.056838 | 7.693098 | 7.472482 | 7.053018  | 6.781011 | 6.65871  | 7.773883 | -0.311  | -0.0867  | 1.72E-05 | 7.26E-06 | 2.277873 | 16 |
| 8971_at | YNL106C INP52 | 7.024334 | 7.136279 | 7.664298   | 7.042982 | 6.998484 | 7.340435 | 6.672654 | 6.588482 | 6.806756  | 6.618054 | 6.761356 | 6.453526 | 7.704956  | 7.484908 | 6.972106 | 6.709101 | -0.0027 | 0.176    | 0.00767  | 0.001236 | 1.537649 | 13 |
| 8972_at | YNL105W       | 3.272979 | 3.244018 | 4.079462   | 3.20421  | 2.985347 | 3.257406 | 3.224031 | 3.267233 | 3.103318  | 3.159584 | 3.218612 | 2.941685 | 3.44334   | 3.363406 | 3.24258  | 3.097506 | -0.0425 | 0.0926   | 0.0624   | 0.007922 | 1.339498 | 13 |
| 8973_at | YNL104C LEU4  | 10.55336 | 10.50391 | 10.58316   | 10.32564 | 10.08112 | 10.29345 | 10.46531 | 10.35119 | 10.51218  | 10.58316 | 10.67569 | 10.37307 | 10.57222  | 10.43686 | 10.4689  | 10.06366 | 0.156   | 0.00344  | 0.901    | 0.086468 | 1.042254 | 13 |
| 8974_at | YNL103W MET4  | 5.578457 | 5.853281 | 5.605109</ |          |          |          |          |          |           |          |          |          |           |          |          |          |         |          |          |          |          |    |

|           |         |        |          |          |          |          |          |          |          |          |          |           |          |          |          |          |          |          |         |         |          |          |          |    |
|-----------|---------|--------|----------|----------|----------|----------|----------|----------|----------|----------|----------|-----------|----------|----------|----------|----------|----------|----------|---------|---------|----------|----------|----------|----|
| 9005_at   | YNL163C | RIA1   | 7.436205 | 7.379098 | 6.652423 | 7.346137 | 7.369882 | 6.991393 | 7.268475 | 7.183745 | 7.081841 | 6.745675  | 6.538268 | 6.426538 | 6.63507  | 6.283863 | 5.781975 | 6.906771 | -0.294  | -0.0632 | 0.000635 | 0.000144 | 2.179061 | 16 |
| 9006_s_at | YNL162W | RPL42A | 10.94196 | 11.42351 | 11.83168 | 11.01201 | 10.98928 | 11.56462 | 10.47717 | 10.53501 | 10.5612  | 9.829324  | 9.812555 | 10.29805 | 9.888915 | 9.192627 | 9.550094 | 10.3278  | -0.596  | 0.0053  | 5.13E-06 | 2.87E-06 | 4.851597 | 18 |
| 9007_at   | YNL161W | CBK1   | 7.29263  | 7.199896 | 6.606547 | 6.820579 | 6.972421 | 6.786613 | 7.36767  | 7.236783 | 7.324122 | 7.537074  | 7.41336  | 6.911923 | 7.001849 | 7.076061 | 6.970226 | 7.19997  | 0.0231  | -0.0541 | 0.466    | 0.047762 | 1.18304  | 13 |
| 9008_at   | YNL160W | YGP1   | 11.72256 | 11.74854 | 11.55272 | 12.26718 | 12.11748 | 12.07731 | 12.47067 | 12.46708 | 12.64578 | 12.476    | 12.36867 | 12.63972 | 12.68173 | 12.70173 | 12.66603 | 12.52669 | 0.25    | -0.0954 | 4.22E-06 | 2.46E-06 | 1.941149 | 9  |
| 9009_at   | YNL159C | ASI2   | 6.305774 | 6.044568 | 5.570114 | 5.918793 | 5.899587 | 5.749199 | 6.023317 | 6.173323 | 5.851284 | 5.806305  | 6.066999 | 6.183348 | 5.949001 | 6.177318 | 6.154364 | 5.976272 | 0.0402  | 0.0135  | 0.555    | 0.055874 | 1.112598 | 13 |
| 9010_at   | YNL158W | PGA1   | 6.162642 | 5.624332 | 4.798346 | 4.536166 | 4.555683 | 4.34298  | 6.305296 | 6.332801 | 6.640858 | 6.272564  | 6.360338 | 5.884907 | 5.878034 | 7.986091 | 6.646772 | 6.174677 | 0.676   | 0.187   | 9.17E-05 | 2.85E-05 | 5.986799 | 6  |
| 9011_at   | YNL157W | IGO1   | 9.585283 | 9.650116 | 9.797555 | 10.13768 | 10.18731 | 9.935421 | 10.02646 | 10.0883  | 10.05028 | 10.61645  | 10.62562 | 10.32494 | 11.35744 | 11.42271 | 11.05486 | 10.35156 | 0.413   | 0.0363  | 1.42E-08 | 4.78E-08 | 2.991051 | 7  |
| 9012_at   | YNL156C | NSG2   | 9.64369  | 9.349643 | 8.526602 | 9.873781 | 9.868494 | 9.039402 | 10.31436 | 10.25914 | 9.985741 | 10.75025  | 10.54864 | 9.988017 | 9.990483 | 9.812508 | 9.797356 | 10.25818 | 0.214   | -0.209  | 0.00626  | 0.001037 | 2.33889  | 9  |
| 9013_at   | YNL155W |        | 4.348952 | 4.038181 | 4.581604 | 4.578428 | 4.451229 | 4.163551 | 4.705383 | 4.591244 | 4.234293 | 5.570128  | 4.909158 | 4.904642 | 6.121533 | 5.496296 | 6.008889 | 4.806636 | 0.429   | 0.0774  | 1.74E-05 | 7.33E-06 | 3.120169 | 7  |
| 9014_at   | YNL154C | YCK2   | 6.330694 | 6.593358 | 6.506975 | 6.673103 | 6.680101 | 6.468756 | 6.460065 | 6.065859 | 6.44908  | 6.637455  | 6.186743 | 6.812314 | 5.936641 | 6.071528 | 6.320036 | 6.481629 | -0.0859 | -0.0505 | 0.088    | 0.010744 | 1.306276 | 13 |
| 9015_at   | YNL153C | GIM3   | 8.466279 | 8.225583 | 8.617546 | 7.727923 | 7.87653  | 7.720859 | 7.571431 | 7.485028 | 7.341284 | 6.989089  | 6.888721 | 6.526481 | 6.286972 | 6.334803 | 6.574239 | 7.094493 | -0.622  | 0.0491  | 2.08E-08 | 6.02E-08 | 5.199488 | 18 |
| 9016_at   | YNL152W |        | 5.349621 | 5.533055 | 5.684435 | 5.695096 | 5.512817 | 5.351716 | 5.670499 | 5.327927 | 5.271267 | 5.590493  | 5.40612  | 5.573645 | 5.253807 | 5.603358 | 5.189708 | 5.481125 | -0.0377 | -0.0126 | 0.493    | 0.050264 | 1.105165 | 13 |
| 9017_at   | YNL151C | RPC31  | 7.28806  | 7.534206 | 7.465718 | 6.870364 | 6.989117 | 6.214336 | 6.734898 | 6.940118 | 6.922457 | 6.972141  | 6.761344 | 5.800937 | 8.276346 | 7.321569 | 6.999734 | 6.460755 | 0.0249  | 0.279   | 0.0103   | 0.001588 | 2.017289 | 13 |
| 9018_at   | YNL150W |        | 6.668605 | 6.56953  | 6.925132 | 5.57129  | 6.26795  | 5.906189 | 6.676702 | 6.175108 | 6.260554 | 6.282305  | 6.597408 | 5.814762 | 5.845563 | 6.305454 | 5.719944 | 6.114553 | -0.154  | 0.0524  | 0.127    | 0.014952 | 1.504944 | 16 |
| 9019_at   | YNL149C | PGA2   | 8.533883 | 8.323974 | 9.148641 | 8.211218 | 8.202198 | 8.414137 | 8.34311  | 8.276269 | 8.008642 | 8.413465  | 8.460757 | 8.47879  | 7.690359 | 7.524327 | 7.330561 | 8.257779 | -0.249  | -0.051  | 0.00275  | 0.000505 | 1.937226 | 16 |
| 9020_at   | YNL148C | ALF1   | 6.114616 | 5.292714 | 6.017759 | 5.046852 | 5.029214 | 4.884379 | 5.115894 | 4.962661 | 4.814708 | 4.604956  | 4.385336 | 4.197257 | 5.07914  | 4.81705  | 3.971016 | 4.584577 | -0.371  | 0.143   | 0.000234 | 6.19E-05 | 2.673559 | 14 |
| 9021_at   | YNL147W | LSM7   | 7.125391 | 7.416382 | 8.373491 | 7.957091 | 7.778311 | 7.534888 | 7.180978 | 7.152212 | 6.861819 | 7.34535   | 6.16086  | 7.793512 | 7.419057 | 8.035285 | 7.516293 | 0.0472   | 0.0517  | 0.661   | 0.065407 | 1.21842  | 13       |    |
| 9022_at   | YNL146W |        | 4.336474 | 3.990434 | 3.336519 | 4.133536 | 4.044933 | 3.982525 | 4.504178 | 4.14621  | 4.053739 | 4.252519  | 4.175162 | 4.241974 | 4.266925 | 4.017797 | 4.093022 | 4.122279 | -0.0827 | 0.0545  | 0.35     | 0.036898 | 1.303402 | 13 |
| 9023_at   | YNL145W | MFA2   | 7.719528 | 7.744591 | 8.184387 | 8.530837 | 8.538955 | 8.611246 | 8.011609 | 7.761513 | 7.943506 | 7.314658  | 7.139292 | 7.704748 | 7.759014 | 8.109446 | 7.699368 | 7.786372 | -0.1    | 0.0267  | 0.613    | 0.061141 | 1.04386  | 13 |
| 9024_at   | YNL144C |        | 4.304719 | 3.869343 | 5.042088 | 5.041536 | 4.70387  | 4.552038 | 5.07255  | 5.127285 | 5.167529 | 5.548666  | 4.888775 | 5.902606 | 7.235361 | 6.75076  | 7.274386 | 5.302635 | 0.681   | 0.122   | 2.71E-06 | 1.77E-06 | 6.074788 | 6  |
| 9025_at   | YNL143C |        | 4.007911 | 3.818534 | 5.278944 | 4.018072 | 3.832337 | 4.005489 | 3.967822 | 3.915447 | 3.839582 | 3.923071  | 4.037293 | 4.052919 | 4.407198 | 4.428849 | 4.543936 | 3.902533 | 0.0306  | 0.141   | 0.0572   | 0.007325 | 1.455475 | 13 |
| 9026_at   | YNL142W | MEP2   | 6.762872 | 6.840845 | 6.734787 | 5.946098 | 9.30867  | 7.876203 | 10.54478 | 9.808589 | 10.51845 | 10.89484  | 10.39044 | 10.92075 | 11.68596 | 11.31604 | 11.47081 | 10.60709 | 1.2     | -0.406  | 3.11E-07 | 3.63E-07 | 24.36328 | 2  |
| 9027_at   | YNL141W | AAH1   | 7.464081 | 7.923405 | 7.949776 | 7.114031 | 7.482672 | 6.917964 | 7.386134 | 7.185416 | 7.390126 | 7.874449  | 7.311328 | 7.473968 | 7.272811 | 6.879496 | 6.990933 | 7.308643 | -0.141  | 0.0171  | 0.126    | 0.014854 | 1.451418 | 16 |
| 9028_at   | YNL186W | UBP10  | 9.681705 | 9.773013 | 9.254363 | 9.853439 | 9.846962 | 9.249273 | 10.18609 | 10.1759  | 9.910607 | 10.176149 | 10.16465 | 10.34146 | 10.29019 | 10.23456 | 10.24904 | 10.18623 | 0.218   | -0.0811 | 0.00558  | 0.000937 | 1.780995 | 9  |
| 9029_at   | YNL185C | MRPL19 | 7.054796 | 7.201868 | 7.54059  | 7.662555 | 7.7919   | 7.741231 | 7.641942 | 7.939679 | 7.435019 | 7.432238  | 7.627456 | 7.822288 | 7.256898 | 7.307975 | 7.040036 | 7.65014  | -0.0244 | -0.111  | 0.00869  | 0.001374 | 1.345341 | 12 |
| 9030_at   | YNL184C |        | 5.189469 | 5.177648 | 5.74407  | 5.802505 | 5.756167 | 5.662179 | 5.721207 | 5.718863 | 5.666797 | 5.509781  | 6.367034 | 6.232933 | 5.402264 | 5.069244 | 5.105137 | 5.898829 | -0.0203 | -0.171  | 0.00721  | 0.001173 | 1.543887 | 12 |
| 9031_at   | YNL183C | NPR1   | 7.319986 | 7.540928 | 7.705282 | 7.929493 | 7.848784 | 7.510454 | 7.651379 | 7.50316  | 7.558805 | 7.811373  | 7.892013 | 7.784188 | 9.860991 | 8.860822 | 8.871202 | 7.776208 | 0.332   | 0.122   | 5.41E-07 | 5.41E-07 | 2.430964 | 8  |
| 9032_at   | YNL182C | IP13   | 5.368853 | 5.549247 | 6.587195 | 4.700626 | 5.42377  | 4.749824 | 5.254971 | 4.939215 | 4.575481 | 4.925215  | 4.57622  | 4.603826 | 4.329789 | 4.313413 | 4.894391 | 4.608445 | -0.455  | 0.0808  | 0.000248 | 6.49E-05 | 3.38955  | 16 |
| 9033_at   | YNL181W |        | 6.731312 | 6.725285 | 6.890943 | 6.905287 | 6.882713 | 6.605448 | 7.219138 | 7.102782 | 6.828704 | 6.834485  | 6.900864 | 7.151217 | 6.049963 | 5.968256 | 5.952405 | 6.953701 | -0.181  | -0.16   | 1.81E-05 | 7.53E-06 | 1.975044 | 15 |
| 9034_at   | YNL179C |        | 4.182578 | 4.038464 | 5.668464 | 4.03375  | 4.736439 | 3.898455 | 4.801798 | 4.510896 | 4.40929  | 4.348592  | 4.553727 | 4.579403 | 4.152997 | 3.973581 | 4.448154 | 4.326731 | -0.0525 | 0.00738 | 0.859    | 0.082831 | 1.14939  | 13 |
| 9035_at   | YNL178W | RPS3   | 12.34457 | 12.30641 | 12.48503 | 12.09929 | 12.21087 | 12.28645 | 12.02146 | 11.84682 | 11.64031 | 11.60411  | 11.25054 | 11.19625 | 10.59501 | 10.62743 | 10.48014 | 11.62404 | -0.492  | -0.0378 | 1.45E-08 | 4.80E-08 | 3.684975 | 18 |
| 9036_at   | YNL177C | MRPL22 | 5.941378 | 5.759346 | 6.07072  | 5.937133 | 6.066226 | 5.562866 | 6.413337 | 6.076299 | 6.048312 | 5.885551  | 5.378456 | 5.331575 | 4.945303 | 5.264133 | 4.740059 | 5.808759 | -0.262  | -0.0981 | 0.000549 | 0.000128 | 2.022917 | 15 |
| 9037_at   | YNL176C |        | 7.77216  | 7.26746  | 7.388358 | 7.709089 | 8.002183 | 7.424978 | 8.933227 | 8.296457 | 8.425596 | 9.933224  | 9.354712 | 9.669009 | 9.200045 | 8.761336 | 9.108969 | 9.858191 | 0.512   | -0.21   | 0.000496 | 0.000117 | 3.882339 | 7  |
| 9038_at   | YNL175C | NOP13  | 8.655692 | 9.022579 | 8.246033 | 7.794702 | 8.04113  | 7.662822 | 8.151112 | 7.87398  | 7.339725 | 7.927008  | 7.321574 | 6.683029 | 6.990287 | 6.944128 | 6.359225 | 7.433275 | -0.506  | 0.0604  | 5.44E-05 | 1.86E-05 | 3.82275  | 18 |
| 9039_at   | YNL174W |        | 5.824929 | 6.234172 | 5.790152 | 4.604159 | 4.914478 | 4.654005 | 5.334333 | 5.29877  | 5.200467 | 5.107257  | 5.024654 | 4.199678 | 4.535846 | 4.851508 | 3.81707  | 4.77556  | -0.36   | 0.0992  | 0.0035   | 0.000624 | 2.5898   | 16 |
| 9040_at   | YNL173C | MDG1   | 4.624718 | 4.383659 | 4.401649 | 4.754769 | 4.524106 | 3.901154 | 5.00515  | 5.467919 | 4.904884 | 6.077304  | 5.397029 | 5.158023 | 5.072332 | 4.853374 | 4.46949  | 5.183162 | 0.16    | -0.163  | 0.0604   | 0.007677 | 1.916841 | 9  |
| 9041_at   | YNL172W | APC1   | 6.886518 | 7.028481 | 6.77905  | 6.853421 | 6.628976 | 6.512597 | 7.380969 | 7.424366 | 6.938479 | 7.503165  | 7.69642  | 7.271425 | 6.805568 | 6.891177 | 6.443008 | 7.242616 | 0.0111  | -0.129  | 0.0937   | 0.01027  | 1.931832 | 12 |
| 9042_at   | YNL171C |        | 4.129316 | 4.345075 | 4.668926 | 3.698283 | 3.975033 | 3.82799  | 4.375662 | 4.502722 | 4.016374 | 4.42622   | 4.353096 | 3.804017 | 4.285996 | 4.482864 | 4.174066 | 4.095406 | 0.0113  | 0.0623  | 0.417    | 0.043201 | 1.176326 | 13 |
| 9043_at   | YNL170W |        | 4.643653 | 4.994664 | 4.519408 | 4.595304 | 4.563075 | 5.090119 | 5.064595 | 4.584925 | 4.997788 | 5.180332  | 5.243152 | 4.746091 | 4.803076 | 5.366806 | 5.005623 | 4.940054 | 0.104   | -0.0148 | 0.156    | 0.017885 | 1.317703 | 10 |
| 9044_at   | YNL169C | PSD1   | 8.218552 | 8.315931 | 7.481014 | 8.686303 | 8.410664 | 8.476371 | 8.758967 | 8.382647 | 8.779417 | 8.840767  | 9.059316 | 8.90094  | 8.499852 | 8.750147 | 8.31754  | 8.826178 | 0.148   | -0.155  | 0.0018   | 0.000351 | 1.845505 | 9  |
| 9045_at   | YNL168C | FMP41  | 7.409818 | 7.375201 | 7.021792 | 7.411322 | 7.383568 | 7.589457 | 7.441179 | 6.938179 | 7.557409 | 6.419199  | 6.823814 | 7.057264 | 6.16027  |          |          |          |         |         |          |          |          |    |

|           |                |          |          |          |          |          |          |          |          |           |          |          |          |          |          |          |          |          |          |          |           |          |          |    |
|-----------|----------------|----------|----------|----------|----------|----------|----------|----------|----------|-----------|----------|----------|----------|----------|----------|----------|----------|----------|----------|----------|-----------|----------|----------|----|
| 9077_at   | YNL226W        | 4.916559 | 4.826654 | 4.687748 | 4.771551 | 4.604528 | 5.190216 | 4.674755 | 5.029051 | 4.930734  | 4.806974 | 5.088217 | 4.809377 | 5.418186 | 5.224878 | 4.899065 | 0.11     | 0.0385   | 0.0149   | 0.0022   | 1.338628  | 13       |          |    |
| 9078_at   | YNL225C CNM67  | 4.957356 | 5.007575 | 5.082253 | 5.062336 | 5.168839 | 4.832031 | 4.601124 | 4.842721 | 4.594471  | 4.977119 | 4.780456 | 4.806306 | 4.814864 | 5.078726 | 4.422442 | 4.838199 | -0.0649  | 0.0171   | 0.266    | 0.028849  | 1.185652 | 13       |    |
| 9079_at   | YNL224C SOS1   | 3.984615 | 3.927488 | 3.446049 | 3.804663 | 3.648147 | 3.406926 | 3.968319 | 3.843113 | 3.615937  | 3.690925 | 3.689701 | 3.356958 | 3.679329 | 3.626423 | 3.359017 | 3.684083 | -0.0546  | -0.00589 | 0.379    | 0.039695  | 1.155676 | 13       |    |
| 9080_at   | YNL223W ATG4   | 4.223563 | 4.095889 | 4.441822 | 4.11961  | 4.371855 | 4.117672 | 4.411936 | 4.515477 | 4.289885  | 4.642024 | 4.414457 | 4.096189 | 4.530865 | 4.591723 | 4.78753  | 4.501355 | 0.115    | -0.0192  | 0.0378   | 0.005053  | 1.572526 | 13       |    |
| 9081_at   | YNL222W SSU72  | 5.941665 | 6.131696 | 5.883646 | 5.484002 | 5.252046 | 5.216504 | 5.283027 | 5.074271 | 4.879518  | 4.701416 | 5.65141  | 4.990136 | 5.080194 | 5.260642 | 5.376313 | 5.03849  | -0.177   | 0.156    | 0.00136  | 0.000278  | 1.938706 | 14       |    |
| 9082_at   | YNL221C POP1   | 7.527486 | 7.338851 | 7.178914 | 7.191422 | 6.907041 | 6.883532 | 7.043524 | 7.253885 | 7.068998  | 7.018274 | 6.94238  | 6.914335 | 6.907628 | 6.965052 | 6.665085 | 6.937615 | -0.111   | 0.0369   | 0.0104   | 0.001614  | 1.342938 | 16       |    |
| 9083_at   | YNL220W ADE12  | 10.42753 | 10.50002 | 10.39019 | 9.97063  | 10.11732 | 9.796925 | 9.756224 | 9.548132 | 9.646752  | 9.939667 | 9.305325 | 9.390052 | 10.74209 | 9.972894 | 10.66733 | 9.598086 | -0.0151  | 0.237    | 0.000405 | 9.82E-05  | 1.816101 | 14       |    |
| 9084_at   | YNL219C ALG9   | 9.226534 | 9.383477 | 8.683492 | 9.377935 | 9.298338 | 8.938558 | 8.959243 | 9.429057 | 9.379246  | 9.478393 | 9.366345 | 9.520254 | 8.172291 | 9.010635 | 8.300439 | 9.426336 | -0.131   | -0.177   | 0.00245  | 0.000458  | 1.884107 | 15       |    |
| 9085_at   | YNL218W MGS1   | 5.236706 | 5.191266 | 5.906194 | 4.982748 | 5.218096 | 4.892843 | 5.644887 | 5.538569 | 5.182008  | 5.70403  | 5.487241 | 5.512661 | 5.126922 | 5.137481 | 4.816962 | 5.37277  | -0.0574  | -0.0462  | 0.433    | 0.0044719 | 1.228174 | 13       |    |
| 9086_at   | YNL217W        | 9.254423 | 9.053978 | 8.914417 | 9.558379 | 9.919821 | 9.442609 | 10.0623  | 9.70739  | 9.491277  | 9.558893 | 9.216855 | 9.060939 | 8.318648 | 8.628024 | 8.177645 | 9.578416 | -0.211   | -0.231   | 3.48E-05 | 1.29E-05  | 2.448745 | 15       |    |
| 9087_at   | YNL216W RAP1   | 6.396985 | 6.477846 | 6.292004 | 5.736483 | 5.782801 | 5.279743 | 5.732891 | 5.779011 | 5.044897  | 6.184984 | 6.602849 | 5.876426 | 7.806621 | 7.645581 | 7.30714  | 5.772311 | 0.355    | 0.328    | 6.34E-06 | 3.37E-06  | 3.927566 | 8        |    |
| 9088_at   | YNL215W IES2   | 4.912671 | 4.807066 | 6.61739  | 4.920298 | 5.244428 | 4.590834 | 5.463158 | 5.000542 | 4.608592  | 5.798312 | 5.121401 | 4.665137 | 4.62393  | 4.469048 | 4.57234  | 4.997979 | -0.181   | -0.00612 | 0.301    | 0.032223  | 1.617816 | 16       |    |
| 9089_at   | YNL214W MRP17  | 4.603095 | 4.591101 | 5.72862  | 4.862768 | 5.185035 | 4.584073 | 5.426185 | 4.815397 | 4.709096  | 5.506032 | 5.231241 | 5.108233 | 4.424494 | 4.509028 | 4.148535 | 5.074716 | -0.111   | -0.117   | 0.0387   | 0.011901  | 1.586365 | 12       |    |
| 9090_at   | YNL213C        | 6.517527 | 6.489767 | 6.805681 | 6.816706 | 6.80862  | 6.577142 | 7.448363 | 7.141181 | 6.858351  | 7.535291 | 7.733769 | 7.765405 | 7.94346  | 7.624579 | 7.594492 | 7.351918 | 0.335    | -0.0585  | 8.27E-05 | 2.61E-05  | 2.42871  | 7        |    |
| 9091_at   | YNL212W VID27  | 6.384394 | 6.438208 | 6.679625 | 6.134094 | 6.376989 | 5.604427 | 6.534301 | 6.572456 | 6.283152  | 7.28604  | 7.356961 | 7.210102 | 9.477807 | 8.950117 | 8.853662 | 6.749977 | 0.721    | 0.279    | 3.6E-08  | 8.79E-08  | 7.088722 | 5        |    |
| 9092_at   | YNL211C        | 7.442679 | 7.151395 | 7.642613 | 7.508369 | 7.61533  | 7.341116 | 7.522986 | 7.583583 | 7.369643  | 8.133401 | 7.913786 | 7.858961 | 8.615297 | 8.225426 | 8.437965 | 7.733833 | 0.282    | 0.0493   | 9.7E-06  | 4.63E-06  | 2.114104 | 8        |    |
| 9093_at   | YNL210W MER1   | 3.415633 | 3.248511 | 4.629646 | 3.338647 | 3.263275 | 2.936366 | 3.281916 | 3.11235  | 2.918759  | 3.386657 | 3.076563 | 2.993349 | 3.018779 | 3.201513 | 3.061091 | 3.018958 | -0.157   | 0.11     | 0.0412   | 0.005462  | 1.678861 | 14       |    |
| 9094_s_at | YNL209W SSB2   | 11.66326 | 11.69303 | 11.62421 | 11.24017 | 11.4978  | 11.48954 | 11.4004  | 11.25286 | 11.41659  | 11.02105 | 10.81611 | 11.13533 | 9.865831 | 9.807995 | 9.708175 | 11.1346  | -0.475   | -0.114   | 1.82E-10 | 5.24E-09  | 3.523643 | 17       |    |
| 9095_at   | YNL254C        | 5.290502 | 4.617116 | 4.609888 | 4.368939 | 4.518533 | 4.200974 | 5.728931 | 5.446982 | 5.318823  | 4.561435 | 4.492862 | 4.565048 | 4.028361 | 4.024106 | 4.932077 | 5.62437  | -0.141   | -0.123   | 0.144    | 0.016705  | 1.695842 | 15       |    |
| 9096_at   | YNL253W TEX1   | 5.618672 | 5.732608 | 5.752161 | 5.223559 | 5.44565  | 4.805346 | 5.587129 | 5.312739 | 5.100307  | 5.348393 | 5.197857 | 5.055682 | 4.333114 | 4.567604 | 4.410621 | 5.1584   | -0.294   | -0.0301  | 0.000103 | 3.14E-05  | 2.182795 | 16       |    |
| 9097_at   | YNL252C MRPL17 | 7.780261 | 7.858232 | 7.6042   | 8.233296 | 8.999878 | 8.735167 | 8.277857 | 8.140317 | 8.5757429 | 8.402326 | 7.564752 | 7.741168 | 7.82598  | 7.61163  | 7.05128  | 8.21098  | -0.108   | -0.155   | 0.0473   | 0.006164  | 1.270392 | 12       |    |
| 9098_at   | YNL251C NRD1   | 5.924305 | 6.047735 | 6.257304 | 5.986392 | 5.868828 | 5.517402 | 5.653234 | 5.780984 | 5.55519   | 6.546625 | 6.177591 | 6.662583 | 9.2365   | 8.578451 | 8.519751 | 6.059686 | 0.71     | 0.375    | 1.70E-09 | 1.38E-08  | 8.359828 | 5        |    |
| 9099_at   | YNL250W RAD50  | 3.894329 | 4.046846 | 5.094827 | 3.962157 | 4.106285 | 3.727956 | 4.486117 | 4.312574 | 3.80877   | 4.275516 | 3.739621 | 4.115687 | 3.76579  | 4.215968 | 4.215968 | 4.215968 | -0.065   | -0.0375  | 0.638    | 0.063411  | 1.222364 | 13       |    |
| 9100_at   | YNL249C MPA43  | 3.609912 | 3.593717 | 4.871665 | 3.472859 | 3.373673 | 3.134862 | 3.500101 | 3.328875 | 3.156239  | 3.197306 | 3.308613 | 3.348659 | 3.137137 | 3.253609 | 3.187175 | 3.27992  | -0.176   | 0.0842   | 0.0701   | 0.008789  | 1.629562 | 16       |    |
| 9101_at   | YNL248C RAP49  | 8.223592 | 8.242354 | 7.841716 | 7.392903 | 7.727002 | 7.025464 | 7.165781 | 7.160017 | 6.815574  | 6.517924 | 6.910085 | 5.537961 | 4.877744 | 4.873654 | 4.406285 | 6.62399  | -0.876   | -0.0586  | 1.7E-07  | 2.45E-07  | 10.19987 | 18       |    |
| 9102_at   | YNL247W        | 6.4449   | 6.793484 | 7.103036 | 6.220092 | 6.394571 | 6.131336 | 6.01585  | 5.759767 | 5.479951  | 5.225287 | 5.400599 | 5.026268 | 4.808855 | 4.630661 | 4.33962  | 5.485792 | -0.674   | 0.0276   | 3.4E-08  | 1.00E-07  | 5.463722 | 18       |    |
| 9103_at   | YNL246W VPS75  | 8.110592 | 7.812961 | 7.980949 | 7.495409 | 7.36043  | 7.122606 | 7.86597  | 6.838401 | 6.65907   | 5.491267 | 6.138787 | 6.562147 | 4.923254 | 5.306531 | 5.038351 | 6.271003 | -0.097   | 0.0773   | 1.48E-08 | 4.85E-08  | 8.264504 | 18       |    |
| 9104_at   | YNL245C CWC25  | 5.699151 | 5.412431 | 6.174762 | 5.283172 | 5.352006 | 5.274242 | 5.580411 | 5.467278 | 5.682434  | 5.557898 | 5.557152 | 5.655348 | 4.256627 | 5.69671  | 5.682125 | 5.480538 | 0.721    | 0.0883   | 0.0753   | 0.009344  | 1.340035 | 13       |    |
| 9105_at   | YNL244C SU11   | 9.5411   | 9.937156 | 10.08508 | 9.67726  | 9.735792 | 9.850619 | 9.656959 | 9.487928 | 9.61397   | 9.820438 | 9.430079 | 10.10598 | 9.583346 | 9.752437 | 9.839774 | 9.689632 | -0.021   | 0.0271   | 0.681    | 0.067161  | 1.104461 | 13       |    |
| 9106_at   | YNL243W SLA2   | 8.607671 | 8.407421 | 8.799004 | 8.473296 | 8.541371 | 8.528098 | 8.663946 | 8.929527 | 7.738452  | 7.883321 | 7.937149 | 7.727543 | 7.895378 | 8.234458 | 8.517217 | 8.12676  | 7.964342 | -0.133   | 0.14     | 0.00609   | 0.001012 | 1.680369 | 14 |
| 9107_at   | YNL242W ATG2   | 4.40322  | 4.291754 | 5.141301 | 5.096316 | 4.921641 | 5.05207  | 5.438113 | 5.418166 | 5.302056  | 5.05321  | 5.200155 | 5.650669 | 5.851757 | 5.900784 | 5.566975 | 5.358803 | 0.282    | -0.0455  | 0.00107  | 0.000226  | 2.110284 | 9        |    |
| 9108_at   | YNL241C ZWF1   | 8.170307 | 7.961789 | 7.52381  | 8.671848 | 8.393738 | 7.520209 | 8.663946 | 8.692463 | 8.959116  | 8.778112 | 8.942697 | 9.534198 | 9.751278 | 9.680489 | 9.611514 | 8.984698 | 0.458    | -0.0544  | 2.14E-06 | 1.49E-06  | 3.368341 | 7        |    |
| 9109_at   | YNL240C NAR1   | 7.182965 | 6.972061 | 7.392029 | 7.616457 | 7.563506 | 7.992655 | 7.937268 | 8.247041 | 8.104601  | 8.777934 | 8.49783  | 8.969281 | 9.019216 | 9.381586 | 9.015663 | 8.419597 | 0.544    | -0.0717  | 8.93E-08 | 1.61E-07  | 4.23432  | 7        |    |
| 9110_at   | YNL238W KEY2   | 7.196732 | 7.05063  | 6.638508 | 6.627692 | 6.904417 | 5.892391 | 6.62109  | 6.547229 | 6.260499  | 6.682167 | 6.765029 | 6.783607 | 6.922029 | 7.040891 | 6.904226 | 6.508846 | 0.0991   | 0.153    | 0.00904  | 0.001422  | 1.688102 | 13       |    |
| 9111_at   | YNL237W YTP1   | 3.981816 | 4.119698 | 4.718087 | 4.933723 | 4.435301 | 4.369744 | 5.94945  | 5.833797 | 5.324337  | 5.795819 | 5.981001 | 6.509828 | 4.89111  | 5.281562 | 4.598753 | 5.734815 | 0.251    | -0.326   | 0.00298  | 0.000542  | 3.295197 | 10       |    |
| 9112_at   | YNL236W SIN4   | 6.02606  | 6.858435 | 6.708008 | 6.504849 | 6.656219 | 7.300828 | 6.899639 | 6.229316 | 6.907009  | 6.6194   | 6.755003 | 6.832967 | 6.601481 | 7.301039 | 6.97585  | 6.771416 | 0.0912   | -0.00232 | 0.426    | 0.004122  | 1.27346  | 13       |    |
| 9113_at   | YNL235C        | 5.298404 | 5.49295  | 4.941633 | 5.20888  | 5.156422 | 5.558203 | 5.313384 | 4.93651  | 5.415019  | 5.101777 | 5.534955 | 5.149386 | 5.463729 | 5.626258 | 5.860232 | 5.270534 | 0.0955   | 0.0514   | 0.0593   | 0.007556  | 1.333167 | 13       |    |
| 9114_at   | YNL234W        | 5.248062 | 5.358278 | 5.17042  | 5.976633 | 5.966106 | 5.976455 | 6.369496 | 6.071061 | 6.571056  | 5.818018 | 6.209796 | 6.553211 | 6.128062 | 6.313673 | 6.365936 | 6.318362 | 0.237    | -0.15    | 0.000291 | 7.43E-05  | 2.104683 | 9        |    |
| 9115_at   | YNL233W BN14   | 7.572883 | 7.205485 | 6.968945 | 7.134891 | 7.084241 | 7.314489 | 7.132583 | 6.915929 | 7.050247  | 7.080403 | 7.150514 | 7.128179 | 8.053421 | 7.721282 | 7.654624 | 7.184603 | 0.201    | 0.061    | 0.000142 | 4.07E-05  | 1.702464 | 8        |    |
| 9116_at   | YNL232W PDL1   | 9.008166 | 8.890306 | 9.331423 | 8.94204  | 8.927406 | 8.928986 | 8.846426 | 8.664302 | 8.841349  | 8.840641 | 8.694504 | 8.399833 | 9.235205 | 9.511833 | 9.072603 | 8.733452 | 0.0276   | 0.124    | 0.00464  | 0.0008    | 1.394267 | 13       |    |
| 9117_at   | YNL231C CSR4   | 10.40752 | 10.09051 | 9.378941 | 10.42154 | 10.46338 | 9.520073 | 11.01924 | 10.64448 | 10.46035  | 10.20691 | 11.58028 | 11.16288 | 11.33084 | 11.31353 | 11.07672 | 11.04746 | 0.415    | -0.133   | 0.00282  | 0.000516  | 3.00717  | 7        |    |
| 9118_at   | YNL276C        | 4.696225 | 5.176824 | 5.552851 |          |          |          |          |          |           |          |          |          |          |          |          |          |          |          |          |           |          |          |    |

|           |                |          |          |          |          |          |          |          |          |          |          |          |          |          |          |           |          |          |          |          |          |          |    |
|-----------|----------------|----------|----------|----------|----------|----------|----------|----------|----------|----------|----------|----------|----------|----------|----------|-----------|----------|----------|----------|----------|----------|----------|----|
| 9149_at   | YNL290W RF3C   | 6.589154 | 6.888227 | 7.300641 | 6.505239 | 6.647815 | 6.65921  | 6.515217 | 6.340794 | 6.2365   | 6.515538 | 5.999816 | 5.817514 | 5.367612 | 6.019850 | 5.777952  | 6.229284 | -0.317   | 0.0268   | 0.000214 | 5.72E-05 | 2.316558 | 16 |
| 9150_at   | YNL289W PCL1   | 4.787962 | 5.531062 | 5.781603 | 5.650598 | 6.247316 | 6.250854 | 5.125505 | 4.417583 | 4.348204 | 4.124779 | 4.07249  | 3.853127 | 4.099681 | 4.305398 | 3.997801  | 4.662431 | -0.442   | 0.0465   | 0.019    | 0.002739 | 3.225356 | 16 |
| 9151_at   | YNL288W CAF40  | 6.97988  | 6.989607 | 6.870838 | 7.025982 | 6.806237 | 6.862196 | 6.701511 | 7.07189  | 6.432196 | 7.062302 | 7.080903 | 7.052924 | 6.839918 | 7.16191  | 6.654661  | 6.903935 | 0.00643  | 0.00212  | 0.986    | 0.093811 | 1.017203 | 13 |
| 9152_at   | YNL287W SEC21  | 9.18873  | 9.372458 | 8.950095 | 8.973755 | 9.060179 | 9.050808 | 9.087912 | 9.21761  | 9.078385 | 8.761485 | 8.793518 | 8.862908 | 8.588175 | 8.414975 | 8.264661  | 8.88813  | -0.151   | 0.000572 | 0.000247 | 0.001003 | 1.493177 | 16 |
| 9153_at   | YNL286W CUS2   | 5.849916 | 6.137667 | 6.946991 | 6.087181 | 6.352661 | 5.781934 | 6.329132 | 6.273985 | 6.007264 | 6.204977 | 5.838197 | 5.683471 | 5.544389 | 5.719457 | 5.522581  | 6.005787 | -0.185   | -0.0159  | 0.0275   | 0.003805 | 1.632817 | 16 |
| 9154_at   | YNL285W        | 4.509994 | 4.631408 | 5.658751 | 4.728644 | 4.776542 | 5.007398 | 4.698989 | 4.799514 | 4.635292 | 4.502922 | 4.524508 | 4.36125  | 4.664833 | 4.725108 | 4.761947  | 4.611642 | -0.0783  | 0.0614   | 0.229    | 0.025231 | 1.315915 | 16 |
| 9155_at   | YNL284C MRPL10 | 7.334957 | 7.459311 | 7.553932 | 7.97489  | 8.11692  | 7.723892 | 8.148228 | 8.023355 | 8.049433 | 7.713427 | 7.439925 | 7.894215 | 7.209051 | 7.085273 | 6.93269   | 7.928845 | -0.124   | -0.18    | 4.94E-05 | 1.71E-05 | 1.872737 | 12 |
| 9156_at   | YNL283C WSC2   | 7.851096 | 7.817326 | 7.803018 | 7.621258 | 7.670789 | 7.531437 | 7.178068 | 7.010972 | 6.786955 | 6.580864 | 7.504318 | 6.422882 | 5.701864 | 6.232812 | 5.937827  | 6.964803 | -0.494   | -0.0159  | 2.95E-05 | 1.12E-05 | 3.70442  | 18 |
| 9157_at   | YNL282W POP3   | 6.747249 | 6.105576 | 6.201217 | 6.034422 | 5.988397 | 5.847767 | 6.755702 | 6.802906 | 5.744669 | 6.417049 | 6.813339 | 5.86705  | 6.377339 | 6.019556 | 5.461596  | 6.244464 | -0.0614  | -0.034   | 0.708    | 0.069662 | 1.205424 | 13 |
| 9158_at   | YNL281W HCH1   | 8.130486 | 8.008878 | 8.793862 | 7.473787 | 7.468312 | 7.601687 | 7.621392 | 7.463273 | 7.330329 | 7.246361 | 8.203509 | 7.883015 | 8.07804  | 7.89086  | 8.643063  | 7.517476 | 0.0163   | 0.195    | 0.0144   | 0.002135 | 1.630906 | 13 |
| 9159_at   | YNL280C ERG24  | 8.753823 | 8.830015 | 8.984486 | 9.530369 | 9.298018 | 8.977065 | 9.519424 | 9.217929 | 9.124414 | 8.507904 | 8.895827 | 9.511585 | 7.010055 | 7.725107 | 7.485844  | 9.166046 | -0.377   | -0.283   | 3.96E-06 | 2.35E-06 | 3.683494 | 17 |
| 9160_at   | YNL279W PRM1   | 5.579399 | 5.05807  | 5.987807 | 5.723795 | 6.063832 | 5.8954   | 6.569326 | 6.087416 | 6.258134 | 5.993258 | 6.750779 | 6.241047 | 5.746668 | 5.544046 | 5.705468  | 6.290629 | 0.05     | -0.192   | 0.00717  | 0.001167 | 1.724454 | 12 |
| 9161_at   | YNL278W CAF120 | 6.421903 | 6.193361 | 6.821986 | 6.752508 | 6.726474 | 6.442345 | 7.160415 | 7.185606 | 6.792655 | 7.163551 | 7.134637 | 6.824328 | 7.203498 | 7.03374  | 6.882544  | 7.004528 | 0.154    | -0.0702  | 0.0109   | 0.001671 | 1.517797 | 13 |
| 9162_at   | YNL277W MET2   | 8.631763 | 8.608749 | 8.623413 | 9.113157 | 8.978256 | 8.602683 | 8.724483 | 8.440282 | 8.534482 | 9.127298 | 8.830339 | 8.23085  | 10.08446 | 9.793653 | 9.430236  | 8.753009 | 0.262    | 0.128    | 0.000942 | 0.000203 | 2.147815 | 8  |
| 9163_at   | YNL321W VNX1   | 6.70195  | 6.924135 | 6.917301 | 6.960912 | 6.734787 | 6.60692  | 7.203729 | 6.771983 | 6.892522 | 6.981942 | 7.036807 | 7.707011 | 6.905848 | 6.814372 | 7.130865  | 7.083662 | 0.0706   | -0.0563  | 0.25     | 0.027294 | 1.283585 | 13 |
| 9164_at   | YNL320W        | 6.880608 | 6.566123 | 6.328823 | 6.47816  | 6.498438 | 6.036899 | 5.676395 | 5.989454 | 6.076259 | 5.967578 | 5.86007  | 6.058576 | 4.984952 | 5.305663 | 5.268996  | 6.063883 | -0.359   | -0.0484  | 9.51E-06 | 4.58E-06 | 2.591149 | 16 |
| 9165_at   | YNL319W        | 3.62545  | 3.488799 | 4.154426 | 3.500955 | 3.468355 | 3.731489 | 3.43708  | 3.524402 | 3.528558 | 3.552124 | 3.503962 | 3.490751 | 3.32754  | 3.312678 | 3.548169  | 3.941027 | -0.0537  | 0.0412   | 0.183    | 0.02059  | 1.204417 | 13 |
| 9166_at   | YNL318C HXT14  | 2.99554  | 3.14426  | 3.9379   | 3.19871  | 3.045884 | 3.157958 | 3.826478 | 3.708    | 3.32932  | 3.72278  | 3.334292 | 3.541847 | 3.52366  | 3.4901   | 2.99746   | 3.466418 | -0.0104  | -0.0558  | 0.568    | 0.057016 | 1.157018 | 13 |
| 9167_at   | YNL317W PFS2   | 6.045593 | 5.89026  | 6.710854 | 5.980832 | 6.026486 | 6.84702  | 6.06499  | 6.088247 | 5.784721 | 5.988066 | 5.976524 | 5.156247 | 5.644647 | 5.983501 | 5.593822  | 5.962389 | -0.101   | -0.00446 | 0.202    | 0.022572 | 1.30793  | 13 |
| 9168_at   | YNL316C PHA2   | 5.102498 | 5.150611 | 6.201125 | 5.168731 | 5.170221 | 5.117974 | 6.847005 | 4.939832 | 4.511842 | 4.115853 | 4.129156 | 4.413004 | 3.774433 | 3.950152 | 3.706391  | 4.422947 | -0.46    | 0.067    | 2.98E-05 | 1.13E-05 | 3.89167  | 16 |
| 9169_at   | YNL315C ATP11  | 8.198644 | 8.345937 | 8.587722 | 8.671384 | 9.102143 | 8.352517 | 8.991169 | 8.611669 | 8.438295 | 8.19506  | 9.675307 | 8.827746 | 8.398436 | 8.123421 | 8.20559   | 8.891189 | -0.00116 | -0.162   | 0.0327   | 0.004445 | 1.481707 | 12 |
| 9170_at   | YNL314W DAL82  | 6.773994 | 6.685013 | 7.415481 | 6.905527 | 6.914455 | 6.680682 | 6.893801 | 6.909231 | 6.821641 | 7.439565 | 7.462192 | 7.48697  | 6.514792 | 6.854414 | 6.703617  | 7.110227 | -0.00594 | -0.0851  | 0.283    | 0.03053  | 1.236138 | 13 |
| 9171_at   | YNL313C        | 6.719594 | 6.624978 | 7.207589 | 6.267209 | 6.478996 | 6.189872 | 6.151708 | 6.1988   | 5.826447 | 6.04829  | 7.612094 | 5.819023 | 6.28913  | 6.03527  | 5.542694  | 6.212605 | -0.181   | 0.0465   | 0.239    | 0.026213 | 1.615699 | 16 |
| 9172_at   | YNL312W RFA2   | 7.860785 | 7.945892 | 8.325513 | 8.057466 | 7.965445 | 7.984214 | 7.456742 | 7.717187 | 7.302165 | 7.550038 | 8.184458 | 7.982629 | 7.394279 | 7.98169  | 7.690644  | 7.736961 | -0.0742  | 0.0366   | 0.396    | 0.041202 | 1.321072 | 13 |
| 9173_at   | YNL311C SKP2   | 4.441319 | 4.681109 | 5.623858 | 4.570665 | 4.519372 | 4.34402  | 4.847233 | 4.701172 | 4.385665 | 4.541688 | 5.165947 | 4.688776 | 4.280782 | 4.612062 | 4.467184  | 4.622956 | -0.0786  | 0.0107   | 0.556    | 0.055972 | 1.231808 | 13 |
| 9174_at   | YNL310C ZIM17  | 7.183175 | 7.075506 | 7.446526 | 7.383853 | 7.500229 | 7.500226 | 7.704737 | 7.619049 | 7.537634 | 7.976935 | 8.046998 | 8.05126  | 7.632282 | 7.332046 | 7.136929  | 7.802438 | 0.0523   | -0.154   | 0.00108  | 0.000227 | 1.581005 | 12 |
| 9175_at   | YNL309W STB1   | 5.646601 | 5.317229 | 6.014772 | 5.69757  | 5.34661  | 5.428659 | 5.522992 | 5.332543 | 5.672319 | 5.512739 | 5.894426 | 5.828367 | 5.339283 | 6.008941 | 5.645241  | 5.591481 | 0.0263   | 0.0164   | 0.798    | 0.077583 | 1.087301 | 13 |
| 9176_at   | YNL308C KR11   | 3.62545  | 3.687416 | 7.879408 | 7.328057 | 7.145634 | 6.880064 | 7.771114 | 7.933708 | 7.723235 | 8.406298 | 7.78379  | 7.97981  | 8.084939 | 7.949899 | 7.515811  | 7.670568 | 0.107    | 0.0199   | 0.396    | 0.041208 | 1.328769 | 13 |
| 9177_at   | YNL307C MCK1   | 8.872787 | 8.430843 | 7.867975 | 8.234133 | 8.129491 | 7.820544 | 8.36201  | 8.035654 | 8.227808 | 7.780772 | 7.773363 | 8.091844 | 6.984575 | 6.456983 | 7.343549  | 7.973488 | -0.253   | -0.0253  | 0.00114  | 0.000238 | 1.957819 | 16 |
| 9178_at   | YNL306W MRPS18 | 6.379318 | 6.378777 | 6.34311  | 6.994125 | 7.180249 | 6.930766 | 7.547262 | 7.422579 | 7.510595 | 7.351194 | 7.026997 | 7.860611 | 7.366538 | 6.633384 | 6.578968  | 7.426789 | 0.0812   | -0.245   | 1.87E-05 | 7.73E-06 | 2.060995 | 12 |
| 9179_at   | YNL305C        | 10.29937 | 10.42419 | 10.3573  | 11.06028 | 11.04525 | 10.98819 | 11.6215  | 11.55241 | 11.36103 | 11.87781 | 11.95612 | 11.65896 | 12.58261 | 12.6319  | 12.40645  | 11.6971  | 0.563    | -0.0688  | 1.01E-09 | 1.05E-08 | 4.451189 | 7  |
| 9180_at   | YNL304W YPT11  | 5.446556 | 5.860495 | 6.047768 | 5.527713 | 5.602177 | 5.308945 | 5.392046 | 5.301401 | 5.209614 | 5.398463 | 5.479116 | 5.259223 | 5.414544 | 5.772957 | 5.214048  | 5.322662 | -0.074   | 0.0828   | 0.0352   | 0.004746 | 1.376281 | 13 |
| 9181_at   | YNL303W        | 5.282952 | 5.836538 | 6.259523 | 5.452488 | 5.465667 | 5.73991  | 5.121063 | 5.169647 | 5.009805 | 5.09024  | 5.069149 | 5.256867 | 5.364037 | 5.960917 | 5.404482  | 5.151941 | -0.0682  | 0.149    | 0.02     | 0.002871 | 1.601743 | 14 |
| 9182_s_at | YNL302C RPS19B | 11.70847 | 11.91812 | 12.12411 | 11.54298 | 11.36715 | 11.8845  | 11.1121  | 10.78108 | 11.01703 | 10.56462 | 10.5324  | 10.45051 | 9.531483 | 9.963975 | 10.705629 | 10.80054 | -0.593   | 0.0126   | 1.54E-07 | 2.28E-07 | 4.813749 | 18 |
| 9183_s_at | YNL301C RPL18B | 12.78314 | 12.92656 | 13.07249 | 12.565   | 12.5144  | 12.92168 | 12.0698  | 11.90632 | 11.97448 | 11.07543 | 11.02432 | 11.51734 | 10.8666  | 11.00905 | 10.91097  | 11.68248 | -0.58    | 0.0769   | 1.87E-06 | 1.35E-06 | 4.652997 | 18 |
| 9184_at   | YNL301C RPL18B | 10.67722 | 10.83199 | 11.32731 | 9.979597 | 9.835083 | 10.32087 | 9.561156 | 9.566831 | 9.602561 | 9.185534 | 8.903484 | 9.154696 | 9.702578 | 9.063875 | 9.687563  | 9.295805 | -0.404   | 0.255    | 2.68E-06 | 1.75E-06 | 3.55528  | 14 |
| 9185_at   | YNL300W        | 9.243249 | 9.491252 | 9.032965 | 8.927621 | 8.869066 | 8.87603  | 7.123232 | 7.120303 | 7.569467 | 6.735083 | 7.375511 | 6.951952 | 7.025265 | 7.587629 | 7.101084  | 7.354893 | -0.59    | 0.261    | 0.000235 | 6.20E-05 | 4.856309 | 18 |
| 9196_s_at | YNL335W DD13   | 8.842598 | 10.14745 | 10.79072 | 9.403307 | 9.28334  | 9.553429 | 8.254382 | 8.148927 | 8.375946 | 8.689834 | 7.21511  | 7.810408 | 7.121832 | 8.123916 | 7.575341  | 7.870935 | -0.77    | 0.305    | 1.21E-05 | 5.51E-06 | 7.708238 | 19 |
| 9197_s_at | YNL334C SNO2   | 5.909007 | 5.99311  | 4.91381  | 6.659328 | 6.871041 | 7.404972 | 6.711792 | 6.776883 | 6.985355 | 6.696774 | 6.908123 | 7.057303 | 6.010297 | 6.489816 | 6.167937  | 7.086096 | 0.158    | -0.335   | 0.000195 | 5.32E-05 | 2.903408 | 10 |
| 9198_s_at | YNL333W SNZ2   | 6.123146 | 5.712781 | 5.370807 | 7.289563 | 7.633159 | 7.102114 | 7.808687 | 7.72783  | 7.363563 | 6.877971 | 6.689289 | 6.641875 | 6.77869  | 7.673899 | 6.600727  | 7.469398 | 0.125    | -0.327   | 0.00991  | 0.001542 | 2.695463 | 12 |
| 9199_at   | YNL331C AAD14  | 7.935695 | 7.691618 | 7.899945 | 8.124896 | 8.247898 | 8.142585 | 8.332632 | 8.106101 | 8.170117 | 8.489193 | 8.253237 | 8.601472 | 8.377092 | 8.559223 | 8.987526  | 8.27515  | 0.113    | -0.0535  | 0.0113   | 0.001726 | 1.363988 | 13 |
| 9200_at   | YNL330C RPD3   | 7.111623 |          |          |          |          |          |          |          |          |          |          |          |          |          |           |          |          |          |          |          |          |    |

|         |                |          |          |          |          |          |          |           |          |          |          |          |          |          |          |          |          |         |         |          |          |          |    |
|---------|----------------|----------|----------|----------|----------|----------|----------|-----------|----------|----------|----------|----------|----------|----------|----------|----------|----------|---------|---------|----------|----------|----------|----|
| 9311_at | YMR304C-A      | 5.906147 | 6.576485 | 6.845805 | 6.490974 | 6.667332 | 6.549859 | 6.469675  | 6.183737 | 5.778728 | 6.358384 | 6.263847 | 6.94493  | 6.604229 | 7.195807 | 6.827154 | 6.411101 | 0.11    | 0.0714  | 0.15     | 0.017226 | 1.425818 | 13 |
| 9312_at | YMR305C SCW10  | 9.815106 | 9.760794 | 9.223792 | 9.875497 | 10.0616  | 9.763257 | 9.678218  | 9.731586 | 9.31134  | 9.788804 | 9.547852 | 9.648422 | 9.377303 | 9.459587 | 9.336652 | 9.702872 | -0.0655 | -0.053  | 0.126    | 0.01481  | 1.265183 | 13 |
| 9313_at | YMR306W FK53   | 6.845973 | 6.381477 | 6.172582 | 7.497132 | 7.509101 | 7.541513 | 8.995334  | 8.830042 | 8.598171 | 8.49204  | 9.611761 | 8.480138 | 8.585188 | 8.500837 | 8.354515 | 8.751847 | 0.502   | -0.335  | 7.83E-05 | 2.50E-05 | 5.039676 | 10 |
| 9314_at | YMR306C-A      | 3.31673  | 3.250567 | 4.700641 | 3.298889 | 3.1492   | 3.276406 | 3.845667  | 3.368095 | 3.36488  | 3.350568 | 3.664827 | 3.172182 | 3.319574 | 3.477079 | 3.346751 | 3.346751 | -0.0831 | 0.0514  | 0.474    | 0.048464 | 1.294366 | 13 |
| 9315_at | YMR307W GAS1   | 11.69329 | 11.47785 | 11.00517 | 11.45663 | 11.47968 | 11.08325 | 11.11414  | 11.1103  | 10.98171 | 10.58702 | 11.33409 | 10.90554 | 11.06086 | 10.99464 | 10.32532 | 11.0409  | -0.168  | 0.0171  | 0.0446   | 0.005868 | 1.562931 | 16 |
| 9316_at | YMR308C PSE1   | 10.01289 | 9.907253 | 9.522428 | 9.556862 | 9.698074 | 9.260515 | 9.501287  | 9.378785 | 9.176405 | 9.826239 | 9.262933 | 9.82537  | 9.268631 | 8.939565 | 9.380897 | 9.136353 | -0.387  | -0.0145 | 1.61E-06 | 1.21E-06 | 2.790397 | 16 |
| 9317_at | YMR309C NIP1   | 7.71865  | 7.811347 | 7.429612 | 7.036647 | 7.309477 | 6.532891 | 7.076588  | 6.93458  | 6.593523 | 6.633153 | 6.495877 | 6.471047 | 7.334279 | 6.540782 | 5.996384 | 6.635429 | -0.269  | 0.137   | 0.00328  | 0.00059  | 2.148188 | 14 |
| 9318_at | YMR310C        | 7.205913 | 7.120602 | 7.800476 | 6.848026 | 7.0954   | 6.999145 | 7.020856  | 6.873689 | 6.659984 | 7.401051 | 7.163488 | 7.182954 | 7.155286 | 7.701182 | 6.871923 | 7.000182 | 0.00305 | 0.0811  | 0.284    | 0.003625 | 1.220596 | 13 |
| 9319_at | YMR311C GLC8   | 7.6494   | 7.349289 | 7.569547 | 7.944389 | 7.818895 | 7.547283 | 8.232835  | 8.289171 | 7.885128 | 8.780453 | 8.614674 | 8.316874 | 8.826156 | 8.762804 | 8.432695 | 8.320193 | 0.33    | -0.0655 | 3.43E-05 | 1.27E-05 | 2.39651  | 7  |
| 9320_at | YMR312W ELP6   | 5.363255 | 5.323595 | 5.587735 | 5.374344 | 5.299232 | 5.176268 | 5.55415   | 5.331838 | 5.212639 | 5.444211 | 5.32154  | 5.353939 | 4.939084 | 4.914609 | 4.538971 | 5.323005 | -0.168  | -0.0773 | 0.000218 | 5.83E-05 | 1.61758  | 16 |
| 9321_at | YMR313C TGL3   | 6.165395 | 6.210127 | 5.984871 | 6.26383  | 6.119578 | 6.494369 | 6.75961   | 6.625205 | 6.724334 | 6.710552 | 7.047812 | 7.426203 | 6.976505 | 7.516148 | 7.486667 | 6.837241 | 0.34    | -0.0359 | 6.89E-05 | 2.25E-05 | 2.460928 | 7  |
| 9322_at | YMR314W PRE5   | 9.360976 | 9.414417 | 9.648501 | 9.269967 | 9.028667 | 9.218193 | 9.2392    | 9.410215 | 9.138853 | 9.347958 | 9.284479 | 9.311453 | 8.572562 | 8.70173  | 8.884777 | 9.223439 | -0.166  | -0.0388 | 0.00071  | 0.000158 | 1.550956 | 16 |
| 9323_at | YMR315W        | 9.17468  | 9.088132 | 9.065313 | 10.06999 | 9.649578 | 9.756647 | 10.03279  | 9.34799  | 9.773881 | 9.593668 | 9.392639 | 9.908796 | 9.936806 | 10.08515 | 9.992385 | 9.804453 | 0.187   | -0.061  | 0.0128   | 0.001928 | 1.641083 | 9  |
| 9324_at | YMR316W DIA1   | 10.01507 | 9.248627 | 9.025524 | 9.565875 | 9.507843 | 8.862456 | 10.15155  | 10.14892 | 9.52262  | 11.23283 | 10.8181  | 10.29917 | 9.200665 | 9.550065 | 9.082522 | 10.19159 | 0.0787  | -0.246  | 0.0719   | 0.008976 | 2.056097 | 12 |
| 9325_at | YMR316C-A      | 7.019316 | 6.796381 | 6.14048  | 6.19933  | 6.559222 | 6.467975 | 6.791687  | 6.604519 | 6.488638 | 6.797983 | 7.069097 | 6.479091 | 6.351665 | 6.876252 | 6.421466 | 6.625675 | 0.00612 | -0.0119 | 0.968    | 0.002405 | 1.039465 | 13 |
| 9326_at | YMR277W FCP1   | 5.964205 | 5.781571 | 6.650442 | 5.727408 | 5.705763 | 5.570899 | 5.844065  | 5.748766 | 5.309257 | 5.881829 | 5.825676 | 6.025795 | 6.702993 | 6.974315 | 6.00743  | 5.714509 | 0.132   | 0.171   | 0.00511  | 0.00087  | 1.860243 | 8  |
| 9327_at | YMR278W        | 7.096961 | 7.084774 | 6.915533 | 7.51201  | 7.5047   | 7.27474  | 8.020066  | 7.73521  | 7.845331 | 6.740221 | 7.41486  | 7.585162 | 6.102422 | 6.481948 | 6.580233 | 7.550876 | -0.189  | -0.231  | 0.000202 | 5.48E-05 | 2.359076 | 15 |
| 9328_at | YMR279C        | 6.467723 | 6.548465 | 7.578135 | 6.575222 | 5.796141 | 8.000415 | 5.488739  | 5.417184 | 5.262295 | 5.214531 | 5.455533 | 5.217146 | 5.587187 | 6.255813 | 5.63241  | 5.21666  | -0.256  | 0.308   | 0.000103 | 3.14E-05 | 3.819119 | 14 |
| 9329_at | YMR280C CAT8   | 3.041667 | 2.781106 | 4.165388 | 3.470681 | 3.379489 | 3.264036 | 3.4700234 | 3.623798 | 3.65888  | 3.830931 | 3.752852 | 4.336079 | 3.912951 | 4.053751 | 3.888004 | 3.789179 | 0.189   | -0.0456 | 0.0613   | 0.007787 | 1.650921 | 9  |
| 9330_at | YMR281W GPI12  | 6.16318  | 6.456196 | 6.875875 | 6.936222 | 6.84474  | 6.812692 | 7.024866  | 6.64077  | 6.819446 | 6.465765 | 6.700592 | 7.250267 | 5.821935 | 5.662371 | 3.662233 | 6.863888 | -0.0694 | -0.133  | 0.0235   | 0.003298 | 1.530242 | 12 |
| 9331_at | YMR282C AEP2   | 5.108825 | 4.823197 | 5.133011 | 5.218439 | 5.348849 | 4.790852 | 4.577293  | 5.28184  | 4.949258 | 5.917273 | 6.203106 | 5.382407 | 5.534729 | 5.230382 | 4.788159 | 5.361226 | 0.0525  | -0.0823 | 0.207    | 0.023091 | 1.372802 | 13 |
| 9332_at | YMR283C RIT1   | 5.500115 | 5.524351 | 6.172105 | 5.823209 | 5.774631 | 5.356526 | 6.004444  | 5.911345 | 5.664718 | 6.129556 | 5.823985 | 6.262859 | 5.68844  | 5.909044 | 5.87791  | 5.910673 | 0.0547  | -0.0407 | 0.416    | 0.043106 | 1.204948 | 13 |
| 9333_at | YMR284W YK070  | 5.661833 | 5.79613  | 5.490883 | 5.469497 | 5.457464 | 5.152213 | 5.863972  | 5.830828 | 5.547154 | 5.705271 | 5.663619 | 5.612694 | 5.023706 | 5.17514  | 4.834348 | 5.604598 | -0.135  | -0.0812 | 0.00581  | 0.000971 | 1.526136 | 15 |
| 9334_at | YMR285C NGL2   | 6.534739 | 6.781916 | 7.084685 | 6.709116 | 6.698481 | 6.335046 | 6.573834  | 6.732271 | 6.28219  | 6.2892   | 6.216016 | 6.393945 | 6.459767 | 6.919452 | 6.127332 | 6.402442 | -0.091  | 0.0694  | 0.0893   | 0.010896 | 1.369192 | 13 |
| 9335_at | YMR286W MRPL33 | 8.791226 | 8.935982 | 9.077494 | 9.771204 | 9.631599 | 9.81772  | 9.785286  | 9.786907 | 9.74154  | 9.944516 | 9.779885 | 9.895129 | 10.08858 | 10.29903 | 10.00422 | 9.943237 | 0.282   | -0.106  | 2.38E-06 | 1.62E-06 | 2.109871 | 9  |
| 9336_at | YMR287C DSS1   | 5.343682 | 5.300372 | 4.48789  | 5.413586 | 5.445166 | 4.480484 | 5.935088  | 5.391669 | 5.500403 | 6.02784  | 5.617949 | 5.464215 | 5.908026 | 6.331816 | 5.686674 | 5.689644 | 0.289   | -0.0167 | 0.00322  | 0.000581 | 2.149476 | 7  |
| 9337_at | YMR288W HSH155 | 5.253856 | 5.603536 | 5.183425 | 5.564966 | 5.500393 | 5.588406 | 5.630843  | 5.585449 | 5.640644 | 5.84428  | 5.686909 | 5.609712 | 5.982854 | 5.912912 | 5.412782 | 5.685726 | 0.109   | -0.0349 | 0.0166   | 0.002428 | 1.335952 | 13 |
| 9338_at | YMR289W ABZ2   | 6.709128 | 6.943005 | 6.286829 | 6.801645 | 6.762241 | 6.811145 | 6.698308  | 6.359214 | 6.672087 | 6.088229 | 5.85615  | 5.959988 | 5.880186 | 5.38678  | 5.472872 | 6.258065 | -0.479  | -0.116  | 7.24E-06 | 3.70E-06 | 3.55845  | 17 |
| 9339_at | YMR290C HAS1   | 7.928467 | 8.008699 | 7.361705 | 7.11607  | 7.21948  | 6.852105 | 6.48085   | 6.806263 | 6.722387 | 6.373559 | 6.3876   | 5.9591   | 6.288545 | 6.143183 | 5.85456  | 6.422117 | -0.452  | 0.145   | 1.73E-06 | 1.27E-06 | 3.315437 | 14 |
| 9340_at | YMR290W-A      | 3.546403 | 3.530711 | 2.992346 | 3.316265 | 3.323886 | 3.687978 | 3.155033  | 3.406991 | 3.37068  | 3.30368  | 3.56266  | 3.508446 | 3.833285 | 3.744851 | 3.947993 | 3.478964 | 0.113   | 0.0348  | 0.074    | 0.009204 | 1.348903 | 14 |
| 9341_at | YMR291W        | 7.334024 | 6.794449 | 5.438722 | 7.162678 | 6.719772 | 6.966272 | 6.25388   | 7.376654 | 7.350385 | 6.646435 | 6.824368 | 7.417003 | 9.109488 | 8.569226 | 9.193771 | 7.074399 | 0.57    | 0.19    | 0.000612 | 0.00014  | 4.529856 | 6  |
| 9342_at | YMR292W GOT1   | 9.166463 | 9.078052 | 9.139719 | 9.277128 | 9.292625 | 8.995462 | 8.661044  | 8.964189 | 8.823903 | 8.930618 | 9.306523 | 9.625071 | 9.431658 | 9.375411 | 9.050092 | 9.102116 | 0.057   | 0.0298  | 0.398    | 0.004124 | 1.185191 | 13 |
| 9343_at | YMR293C        | 5.973936 | 6.037063 | 5.798519 | 6.284987 | 6.384907 | 6.225646 | 6.18247   | 6.007676 | 6.327222 | 5.81415  | 5.923804 | 5.752909 | 5.388799 | 5.493497 | 5.503712 | 6.076935 | -0.156  | -0.0988 | 0.000118 | 3.49E-05 | 1.648446 | 15 |
| 9344_at | YMR294W JNM1   | 5.534915 | 5.370933 | 5.101289 | 5.135832 | 5.188717 | 6.686135 | 5.186243  | 5.247787 | 5.029228 | 5.592378 | 5.158157 | 4.892023 | 5.926277 | 5.466414 | 6.689866 | 5.128733 | 0.104   | 0.103   | 0.012    | 0.001828 | 1.516705 | 13 |
| 9345_at | YMR294W-A      | 5.779881 | 5.809078 | 5.360842 | 5.279178 | 5.633737 | 5.358413 | 5.657078  | 5.678598 | 5.962013 | 5.432926 | 5.700977 | 5.237919 | 5.487784 | 6.326974 | 5.959376 | 5.545772 | 0.061   | 0.0646  | 0.224    | 0.024734 | 1.289069 | 13 |
| 9346_at | YMR295C        | 11.22419 | 10.89964 | 10.65406 | 11.31221 | 11.4544  | 11.37673 | 11.59229  | 11.74117 | 12.00045 | 12.21878 | 12.17914 | 12.37908 | 11.93658 | 12.08487 | 12.23385 | 12.00364 | 0.334   | -0.141  | 7.15E-06 | 3.67E-06 | 2.425838 | 9  |
| 9347_at | YMR296C LCB1   | 9.758596 | 9.614233 | 9.459822 | 9.544305 | 9.415431 | 9.357666 | 9.488533  | 9.17908  | 9.322153 | 9.069372 | 9.045367 | 9.07419  | 9.365606 | 9.135194 | 9.052425 | 9.199755 | -0.129  | 0.0563  | 0.00081  | 0.000177 | 1.409855 | 16 |
| 9348_at | YMR297W PR1    | 9.944177 | 10.15774 | 10.22342 | 10.78115 | 10.7922  | 10.84037 | 11.16397  | 10.7953  | 11.07064 | 10.35355 | 10.3787  | 10.68045 | 9.963307 | 10.40464 | 10.04772 | 10.80225 | -0.0403 | -0.186  | 0.00244  | 0.000458 | 1.643948 | 12 |
| 9349_at | YMR295W FCD1   | 6.228538 | 6.283651 | 6.466815 | 7.036181 | 6.808081 | 6.567674 | 6.535612  | 6.6215   | 6.5976   | 6.977714 | 6.814125 | 6.799204 | 5.958309 | 7.950998 | 7.366327 | 6.283142 | 0.313   | 0.0444  | 0.84E-05 | 1.09E-05 | 2.290436 | 7  |
| 9350_at | YMR256C COX7   | 9.114839 | 9.373056 | 9.221859 | 11.20875 | 11.06147 | 10.82055 | 11.31342  | 11.26254 | 11.46073 | 11.68305 | 11.56985 | 11.84979 | 10.6317  | 10.82453 | 10.43308 | 11.70012 | 0.352   | -0.482  | 2.14E-10 | 5.33E-09 | 5.652893 | 10 |
| 9351_at | YMR257C PET111 | 5.458099 | 5.512606 | 4.559487 | 5.786915 | 5.660572 | 5.172862 | 6.38186   | 5.968184 | 6.249087 | 6.476016 | 6.191696 | 6.549687 | 6.308427 | 6.157823 | 6.118092 | 6.296244 | 0.28    | -0.171  | 0.000226 | 6.00E-05 | 2.369564 | 9  |
| 9352_at | YMR258C        | 6.145077 | 5.959052 | 5.896232 | 6.31549  | 6.343    |          |           |          |          |          |          |          |          |          |          |          |         |         |          |          |          |    |



|           |                |          |          |            |          |          |          |          |          |          |          |          |          |           |           |          |          |          |          |          |           |          |    |
|-----------|----------------|----------|----------|------------|----------|----------|----------|----------|----------|----------|----------|----------|----------|-----------|-----------|----------|----------|----------|----------|----------|-----------|----------|----|
| 9383_at   | YMR244C        | 4.999941 | 4.606902 | 5.540246   | 4.972478 | 5.261759 | 5.027276 | 6.151205 | 6.04467  | 5.894573 | 7.096502 | 7.018163 | 6.437848 | 9.4984839 | 10.38038  | 9.735124 | 6.335537 | 1.31     | 0.324    | 1.29E-09 | 1.15E-08  | 32.27162 | 3  |
| 9384_at   | YMR244C-A      | 7.854715 | 7.347341 | 7.768927   | 8.409493 | 8.419817 | 8.569835 | 9.125938 | 9.05607  | 8.782274 | 9.947274 | 9.824128 | 9.951955 | 9.884655  | 10.14113  | 9.839474 | 9.454599 | 0.646    | -0.184   | 3.35E-08 | 8.49E-08  | 5.537226 | 4  |
| 9385_at   | YMR245W        | 5.892919 | 5.663026 | 6.445241   | 5.39697  | 5.654606 | 5.587572 | 5.81802  | 5.401458 | 5.7145   | 6.092968 | 6.135396 | 5.807324 | 7.146792  | 7.34164   | 7.176211 | 5.759172 | 0.336    | 0.23     | 1.01E-06 | 8.59E-07  | 3.035792 | 7  |
| 9386_at   | YMR246W FAA4   | 8.911087 | 8.795833 | 8.69139    | 8.694012 | 8.471971 | 8.91092  | 9.008672 | 8.780188 | 8.938015 | 9.674326 | 9.578226 | 10.0667  | 10.20426  | 10.12126  | 10.20144 | 9.271526 | 0.419    | 0.0519   | 1.83E-05 | 1.77E-06  | 3.033573 | 8  |
| 9387_at   | YMR247C RKR1   | 8.35317  | 8.577335 | 8.523707   | 8.681986 | 8.772446 | 8.728354 | 9.011107 | 8.84157  | 8.695347 | 8.678325 | 9.012908 | 9.095346 | 8.28445   | 8.603754  | 8.387354 | 8.88252  | -0.00573 | -0.118   | 0.000767 | 0.000169  | 1.339803 | 12 |
| 9388_at   | YMR250W GAD1   | 6.626752 | 6.848687 | 7.314044   | 8.007114 | 8.772112 | 9.091053 | 9.307107 | 9.303303 | 9.44239  | 7.470951 | 8.180735 | 8.919393 | 7.724238  | 8.058887  | 7.91516  | 9.062175 | 0.113    | -0.433   | 0.0071   | 0.001158  | 3.413388 | 11 |
| 9389_at   | YMR251W GTO3   | 3.634687 | 3.823436 | 4.687773   | 3.974778 | 3.711959 | 3.926785 | 3.965467 | 4.11257  | 4.250702 | 3.891073 | 4.036907 | 3.809615 | 4.62392   | 4.06771   | 4.029056 | 3.961774 | 0.0445   | 0.0487   | 0.451    | 0.046477  | 1.207842 | 13 |
| 9390_at   | YMR251W HOR7   | 11.94643 | 12.01819 | 11.792     | 13.10648 | 12.92945 | 12.83739 | 13.12103 | 13.19121 | 13.20958 | 13.31492 | 13.08037 | 13.39083 | 13.1291   | 13.23998  | 13.05584 | 13.32887 | 0.294    | -0.216   | 1.12E-07 | 1.84E-07  | 2.704889 | 9  |
| 9391_at   | YMR252C        | 7.057328 | 7.008141 | 6.784867   | 7.268172 | 6.932889 | 6.953903 | 7.752738 | 7.598206 | 7.67427  | 8.507955 | 8.427871 | 8.898238 | 9.082351  | 9.023837  | 8.87575  | 8.038432 | 0.604    | -0.0289  | 2.72E-06 | 1.77E-06  | 4.959053 | 6  |
| 9392_at   | YMR253C        | 5.801989 | 5.439209 | 5.503233   | 5.92439  | 5.55436  | 5.399688 | 7.03334  | 6.983877 | 7.191754 | 7.71477  | 7.641401 | 7.619174 | 7.7469    | 7.287951  | 7.774202 | 7.126787 | 0.614    | -0.163   | 0.000211 | 5.66E-05  | 5.09863  | 4  |
| 9393_at   | YMR254C        | 4.356409 | 4.135594 | 3.659893   | 4.753555 | 4.17107  | 4.491297 | 4.517614 | 4.759741 | 4.883797 | 5.730453 | 5.630651 | 5.332522 | 4.792934  | 4.716261  | 4.92702  | 5.122351 | 0.265    | -0.197   | 0.00109  | 0.000229  | 2.462735 | 9  |
| 9394_at   | YMR212C EFR3   | 7.736838 | 7.850918 | 7.661308   | 7.339497 | 7.191148 | 7.134    | 7.356053 | 7.225387 | 7.072979 | 6.706481 | 6.755591 | 7.122804 | 6.275165  | 6.69376   | 6.190846 | 7.104329 | -0.32    | -0.0146  | 0.000342 | 8.51E-05  | 2.332658 | 16 |
| 9395_at   | YMR213W CEF1   | 6.008723 | 5.902062 | 6.846052   | 6.081948 | 6.127195 | 6.061341 | 6.523317 | 6.464554 | 5.88365  | 6.246607 | 6.424044 | 6.004369 | 6.012553  | 6.574357  | 5.978137 | 6.20512  | -0.00673 | 0.00154  | 0.994    | 0.094506  | 1.017989 | 13 |
| 9396_at   | YMR214W SCJ1   | 7.952653 | 7.876159 | 8.181082   | 7.741132 | 7.83969  | 7.646733 | 7.998271 | 7.728134 | 7.408925 | 7.635507 | 7.818486 | 7.524929 | 7.044638  | 7.551618  | 7.039323 | 7.645999 | -0.19    | -0.0125  | 0.00198  | 0.000382  | 1.654893 | 14 |
| 9397_at   | YMR215W GAS3   | 8.344296 | 8.231227 | 7.954344   | 6.861363 | 6.886798 | 6.935447 | 6.152322 | 5.811811 | 5.913696 | 6.342434 | 6.45203  | 6.05789  | 6.924828  | 7.57109   | 6.544457 | 6.084497 | -0.281   | 0.415    | 2.88E-05 | 1.10E-05  | 4.293434 | 16 |
| 9398_at   | YMR216C SKY1   | 7.32942  | 7.086131 | 6.684094   | 7.562861 | 7.155834 | 7.086075 | 7.315741 | 7.667461 | 7.656614 | 7.394846 | 7.808213 | 8.152233 | 8.567482  | 8.500205  | 8.448854 | 7.662923 | 0.383    | 0.028    | 2.26E-05 | 9.10E-06  | 2.761714 | 7  |
| 9399_at   | YMR217W GUA1   | 9.750307 | 10.04049 | 9.929266   | 9.393223 | 9.669776 | 9.260715 | 9.07896  | 9.084342 | 8.833588 | 8.631432 | 8.514857 | 8.393749 | 7.448424  | 7.796654  | 7.323842 | 8.754103 | -0.628   | -0.00844 | 3.80E-09 | 2.14E-08  | 5.278369 | 18 |
| 9400_at   | YMR218C TRS130 | 5.43751  | 5.230343 | 4.864994   | 4.598258 | 4.6074   | 4.371238 | 4.678655 | 4.736154 | 4.450024 | 4.341564 | 4.530086 | 4.095299 | 4.84597   | 4.387361  | 4.288688 | 4.380281 | -0.171   | 0.124    | 0.0013   | 0.000266  | 1.778376 | 14 |
| 9401_at   | YMR219W ESC1   | 4.549586 | 4.641032 | 5.431978   | 5.128444 | 4.91804  | 4.888704 | 5.047265 | 5.259914 | 4.832557 | 4.850083 | 5.052235 | 4.986822 | 5.07357   | 5.189422  | 4.709046 | 5.023648 | 0.0246   | -0.0249  | 0.764    | 0.074656  | 1.105019 | 13 |
| 9402_at   | YMR220W ERG8   | 9.431235 | 9.519356 | 9.38509    | 10.48737 | 10.24287 | 9.292974 | 10.21901 | 10.19446 | 10.0955  | 11.39042 | 11.14622 | 11.1201  | 9.73209   | 9.645263  | 9.629785 | 10.68547 | 0.148    | -0.318   | 0.0026   | 0.000482  | 2.739128 | 12 |
| 9403_at   | YMR221C FMP42  | 7.110646 | 7.327757 | 7.355366   | 7.399049 | 7.138806 | 7.171397 | 8.052021 | 7.546898 | 7.709523 | 8.33157  | 8.06806  | 8.226684 | 8.61367   | 7.605864  | 8.686018 | 7.82897  | 0.0415   | -0.191   | 0.0595   | 0.007583  | 1.96844  | 12 |
| 9404_at   | YMR222C FSH2   | 8.485927 | 8.48555  | 8.936351   | 8.481939 | 8.326256 | 8.547161 | 8.498557 | 8.452401 | 8.385863 | 8.445763 | 8.321422 | 8.30165  | 7.806755  | 8.246207  | 8.050288 | 8.372142 | -0.148   | -0.0114  | 0.00152  | 0.000304  | 1.480903 | 16 |
| 9405_at   | YMR223W UBP8   | 5.242814 | 5.171673 | 5.026286   | 5.236802 | 5.122653 | 5.182599 | 5.332135 | 5.017657 | 5.312131 | 5.229616 | 5.248473 | 5.309604 | 5.013952  | 5.123454  | 4.981669 | 5.234529 | -0.0199  | -0.0397  | 0.0549   | 0.007047  | 1.13814  | 13 |
| 9406_at   | YMR224C MRE11  | 5.262559 | 5.189771 | 4.844748   | 5.233559 | 5.249199 | 5.286317 | 5.317463 | 5.232831 | 5.374192 | 5.360797 | 5.238547 | 5.196033 | 4.669111  | 4.821934  | 4.499049 | 5.291073 | -0.107   | -0.113   | 3.67E-05 | 1.34E-05  | 1.559455 | 12 |
| 9407_at   | YMR225C MRPL44 | 6.837996 | 6.99188  | 7.438094   | 8.53887  | 8.316191 | 8.75396  | 8.626215 | 8.276674 | 8.571088 | 8.825595 | 8.515299 | 8.43994  | 7.901356  | 8.132668  | 7.769322 | 8.890341 | 0.214    | -0.374   | 8.99E-06 | 4.37E-06  | 3.487178 | 10 |
| 9408_at   | YMR225C MRPL44 | 4.646859 | 4.603894 | 4.413275   | 5.5121   | 5.501066 | 5.521048 | 5.91396  | 5.958373 | 5.627344 | 6.098316 | 5.759968 | 6.64131  | 6.220685  | 4.817157  | 6.079741 | 0.154    | -0.346   | 3.62E-06 | 2.21E-06 | 2.95929   | 10       |    |
| 9409_at   | YMR226C TMA29  | 10.6431  | 10.95056 | 11.43738   | 11.86684 | 11.81851 | 11.75806 | 11.9756  | 11.94839 | 12.00107 | 11.55761 | 11.59644 | 11.47508 | 9.990101  | 10.07869  | 10.32774 | 11.83671 | -0.251   | -0.344   | 1.24E-07 | 1.98E-07  | 3.041423 | 15 |
| 9410_at   | YMR227C TAF7   | 5.791118 | 5.817227 | 5.765706   | 5.888234 | 5.817077 | 5.731576 | 5.963363 | 5.921015 | 5.667917 | 6.288264 | 5.946662 | 5.597669 | 6.030669  | 6.095436  | 5.921683 | 5.892878 | 0.0636   | 0.00227  | 0.189    | 0.0021242 | 1.183641 | 13 |
| 9411_at   | YMR228W MTF1   | 6.164875 | 6.539771 | 6.046532   | 6.840862 | 7.141593 | 6.732985 | 6.762693 | 6.55132  | 6.476841 | 6.408666 | 6.301102 | 6.072102 | 5.84972   | 5.904865  | 5.730626 | 6.551053 | -0.192   | -0.112   | 0.00146  | 0.000295  | 1.813437 | 15 |
| 9412_at   | YMR229C RRP5   | 7.530867 | 7.583267 | 7.22275    | 7.013472 | 7.082988 | 7.004401 | 6.68409  | 6.681589 | 6.382857 | 6.428516 | 6.115326 | 6.177603 | 6.130772  | 6.089682  | 5.717852 | 6.38449  | -0.142   | 0.0945   | 5.89E-06 | 3.18E-06  | 2.981352 | 16 |
| 9413_f_at | YMR230W RPS10B | 3.825371 | 4.176389 | 4.012899   | 3.054337 | 2.975959 | 3.304542 | 2.599802 | 2.931404 | 2.59997  | 2.310349 | 2.651616 | 2.370479 | 2.488038  | 2.200223  | 2.451485 | 2.517993 | -0.419   | 0.185    | 8.89E-08 | 1.61E-07  | 3.069359 | 14 |
| 9414_f_at | YMR230W RPS10B | 10.70107 | 11.02971 | 11.36245   | 10.52279 | 11.05226 | 11.01883 | 9.811075 | 9.838235 | 9.949279 | 9.313026 | 9.315251 | 9.47229  | 8.749891  | 9.0652    | 9.136501 | 9.170614 | -0.573   | 0.0922   | 3.16E-06 | 2.00E-06  | 4.567704 | 18 |
| 9415_at   | YMR231W PEP5   | 4.521284 | 4.703999 | 4.398944   | 4.382885 | 4.371888 | 4.33189  | 4.192403 | 4.092517 | 4.239719 | 3.865503 | 4.042754 | 4.082274 | 3.863459  | 3.593063  | 3.822539 | 4.005034 | -0.2     | 0.0267   | 4.44E-05 | 1.56E-05  | 1.697529 | 16 |
| 9416_at   | YMR191W SPG5   | 6.273218 | 6.431325 | 6.226305   | 6.447951 | 6.278605 | 6.206304 | 6.870494 | 6.81255  | 6.559745 | 7.771136 | 7.759839 | 7.941162 | 8.007776  | 8.512025  | 8.346904 | 7.91635  | -0.92    | 0.0195   | 3.52E-06 | 2.16E-06  | 4.802905 | 6  |
| 9417_at   | YMR192W GYL1   | 3.319282 | 3.261974 | 3.01279    | 3.129251 | 3.051136 | 3.290436 | 3.226361 | 3.168953 | 3.236206 | 3.136776 | 3.368976 | 3.117962 | 3.098631  | 3.283155  | 3.146572 | 3.194517 | -0.00163 | -0.00288 | 0.984    | 0.093632  | 1.009468 | 13 |
| 9418_at   | YMR193W MRPL24 | 7.365792 | 7.473603 | 7.580324   | 8.351937 | 8.39718  | 8.376853 | 8.522762 | 8.033555 | 8.135623 | 7.753379 | 7.437807 | 7.169945 | 6.73801   | 6.964333  | 6.378303 | 8.005077 | -0.278   | -0.243   | 0.000207 | 5.58E-05  | 2.824268 | 15 |
| 9419_at   | YMR193C-A      | 5.114159 | 5.141361 | 4.163805   | 4.556239 | 4.700566 | 4.970552 | 4.536426 | 4.570657 | 4.928639 | 4.904058 | 4.98167  | 4.62387  | 5.227727  | 5.26534   | 5.047644 | 4.738494 | 0.0959   | 0.0704   | 0.0996   | 0.011997  | 1.38767  | 13 |
| 9420_i_at | YMR194W RPL36A | 12.32233 | 12.57623 | 12.56944   | 12.06672 | 11.99874 | 12.35534 | 11.79062 | 11.2303  | 11.26074 | 11.32336 | 10.85709 | 10.38394 | 10.00998  | 10.19362  | 10.37783 | 11.20556 | -0.632   | 0.0443   | 2.01E-06 | 1.42E-06  | 5.340577 | 12 |
| 9421_s_at | YMR194W RPL36A | 11.26919 | 11.43572 | 12.06085   | 11.21746 | 11.15837 | 11.60483 | 10.55186 | 10.56706 | 10.52471 | 10.18037 | 9.629911 | 9.301773 | 9.654264  | 10.37065  | 10.24696 | 10.39499 | -0.442   | 0.131    | 0.000276 | 7.11E-05  | 3.203734 | 14 |
| 9422_at   | YMR195W ICY1   | 9.008346 | 9.084653 | 8.971268   | 10.00199 | 10.12839 | 10.10161 | 10.59836 | 10.67421 | 10.69386 | 10.8732  | 10.78946 | 11.00705 | 10.65231  | 10.630359 | 10.77244 | 10.79995 | 0.396    | -0.239   | 7.19E-08 | 1.37E-07  | 3.372106 | 16 |
| 9423_at   | YMR196W        | 5.052158 | 4.740732 | 4.791713   | 8.318766 | 8.493099 | 8.877959 | 8.24115  | 8.276574 | 8.179813 | 8.234718 | 8.37191  | 8.059217 | 8.354315  | 8.034694  | 8.573444 | 0.166    | -0.227   | 0.000957 | 0.000205 | 2.25893   | 9        |    |
| 9424_at   | YMR197C VT11   | 7.855224 | 8.244409 | 8.035739</ |          |          |          |          |          |          |          |          |          |           |           |          |          |          |          |          |           |          |    |

|           |                 |          |          |          |          |           |          |          |          |          |          |          |           |          |          |          |          |           |         |          |          |          |    |
|-----------|-----------------|----------|----------|----------|----------|-----------|----------|----------|----------|----------|----------|----------|-----------|----------|----------|----------|----------|-----------|---------|----------|----------|----------|----|
| 9455_at   | YMR185W         | 4.84169  | 4.965249 | 5.665838 | 5.047706 | 5.139903  | 4.723713 | 5.70041  | 5.306605 | 5.049955 | 5.810489 | 6.537578 | 5.868277  | 6.358435 | 6.678922 | 6.310563 | 5.610115 | 0.397     | 0.0444  | 0.000682 | 0.000153 | 2.861157 | 7  |
| 9456_at   | YMR186W HSC82   | 10.77921 | 11.12272 | 11.05216 | 10.16919 | 10.12306  | 9.855664 | 10.17039 | 9.591422 | 9.727959 | 9.877668 | 9.748835 | 10.27507  | 11.58424 | 10.92985 | 11.53626 | 9.825736 | 0.1       | 0.367   | 2.42E-06 | 1.64E-06 | 2.760486 | 8  |
| 9457_g_at | YMR186W HSC82   | 10.37499 | 10.29966 | 9.668408 | 9.599385 | 9.737444  | 9.093784 | 10.20606 | 9.815319 | 9.507312 | 9.22533  | 9.725668 | 9.125405  | 10.99    | 10.58461 | 10.65723 | 9.495802 | 0.137     | 0.255   | 0.00163  | 0.000324 | 2.276202 | 8  |
| 9458_at   | YMR187C         | 6.662384 | 6.601057 | 6.412652 | 6.685429 | 6.963454  | 6.252634 | 6.80768  | 6.896653 | 6.704499 | 6.988413 | 6.768573 | 6.805038  | 7.919503 | 6.787227 | 6.862962 | 6.800344 | 0.238     | 0.06    | 0.0019   | 0.00037  | 1.816568 | 8  |
| 9459_at   | YMR188C MRSP517 | 7.702717 | 7.639066 | 7.451324 | 8.028311 | 8.124488  | 7.340774 | 8.186052 | 8.161327 | 7.685564 | 8.273404 | 7.732873 | 7.666552  | 8.362616 | 8.132283 | 7.859788 | 7.98085  | 0.122     | -0.033  | 0.121    | 0.014295 | 1.382777 | 13 |
| 9460_at   | YMR189W GCV2    | 6.804733 | 8.896065 | 8.535656 | 7.806434 | 7.572872  | 7.82237  | 8.001111 | 7.092567 | 7.022829 | 6.574009 | 6.484016 | 6.966055  | 6.505956 | 7.07491  | 6.752802 | 6.864662 | -0.497    | 0.24    | 5.92E-07 | 5.80E-07 | 3.977985 | 14 |
| 9461_at   | YMR190C SGS1    | 4.686073 | 5.076884 | 5.703149 | 4.912069 | 4.69235   | 5.034927 | 5.058757 | 5.099718 | 4.671414 | 5.465954 | 5.665882 | 5.676214  | 6.003237 | 6.553434 | 6.030853 | 5.21328  | 0.314     | 0.122   | 0.000435 | 0.000105 | 2.347652 | 8  |
| 9462_at   | YMR152W YIM1    | 6.150842 | 6.007026 | 6.914631 | 6.252153 | 6.166823  | 5.988841 | 6.316846 | 6.143449 | 6.210876 | 5.904903 | 5.731921 | 6.373918  | 5.340674 | 5.550282 | 5.388136 | 6.064297 | -0.232    | -0.0494 | 0.00181  | 0.000353 | 1.849547 | 16 |
| 9463_at   | YMR153W NUP53   | 6.897654 | 6.686654 | 6.617364 | 6.380318 | 6.624109  | 5.788149 | 6.567119 | 6.406378 | 5.952512 | 6.533741 | 6.342645 | 6.161532  | 6.081984 | 6.130787 | 5.94184  | 6.246034 | -0.148    | 0.036   | 0.0475   | 0.006187 | 1.481855 | 16 |
| 9464_at   | YMR153C-A       | 4.536092 | 4.621911 | 5.496657 | 4.039556 | 4.333319  | 4.079784 | 4.548994 | 4.24722  | 4.085737 | 4.20867  | 4.0353   | 4.118531  | 3.983165 | 4.383012 | 4.020017 | 4.085785 | -0.175    | 0.111   | 0.0108   | 0.00166  | 1.731972 | 14 |
| 9465_at   | YMR154C RIM13   | 4.262738 | 4.210466 | 5.22555  | 4.448171 | 4.156347  | 4.065767 | 4.59131  | 4.372384 | 4.133195 | 4.495539 | 5.866519 | 4.650702  | 4.060604 | 4.561394 | 4.190503 | 4.578471 | 0.00132   | -0.0532 | 0.822    | 0.07972  | 1.139616 | 13 |
| 9466_at   | YMR155W         | 5.474126 | 5.482164 | 5.902819 | 5.837932 | 5.753669  | 5.293131 | 6.563245 | 6.446324 | 5.892676 | 6.421863 | 7.001629 | 7.052115  | 6.110432 | 5.96573  | 5.783601 | 6.426623 | 0.166     | -0.188  | 0.0236   | 0.003312 | 2.05523  | 9  |
| 9467_at   | YMR156C TPP1    | 5.260795 | 4.938128 | 6.070475 | 5.603409 | 5.697229  | 5.495399 | 5.47996  | 5.564754 | 5.391978 | 4.95987  | 5.487325 | 5.767715  | 5.298383 | 5.57103  | 5.281725 | 5.487612 | -0.0258   | -0.0204 | 0.833    | 0.00864  | 1.09596  | 13 |
| 9468_at   | YMR157C FMP39   | 8.59243  | 8.269382 | 7.907457 | 9.294516 | 9.401581  | 9.41255  | 9.614026 | 9.392969 | 9.247266 | 9.084236 | 9.512901 | 9.72324   | 8.481723 | 6.89054  | 8.429447 | 9.563384 | 0.053     | -0.316  | 9.45E-06 | 4.56E-06 | 2.340904 | 12 |
| 9469_at   | YMR158W MRPS8   | 7.129015 | 7.116874 | 7.630058 | 7.765325 | 7.976593  | 7.727585 | 7.711013 | 7.502918 | 7.479507 | 7.130531 | 7.041645 | 7.316457  | 6.185413 | 6.205906 | 5.8657   | 7.472222 | -0.346    | -0.209  | 9.66E-07 | 8.27E-07 | 2.963391 | 15 |
| 9470_at   | YMR158W-B       | 5.391443 | 5.24245  | 5.66765  | 5.027334 | 4.986921  | 5.068489 | 5.110022 | 5.031527 | 5.100871 | 4.928472 | 4.685628 | 4.922763  | 5.065041 | 4.874855 | 4.969809 | -0.12    | 0.0544    | 0.0122  | 0.001847 | 1.384382 | 16       |    |
| 9471_at   | YMR159C ATG16   | 3.049512 | 2.83975  | 3.691671 | 2.654699 | 2.72243   | 2.748239 | 3.359928 | 3.114653 | 2.955181 | 3.110491 | 3.110149 | 2.830724  | 4.827487 | 4.835029 | 4.217629 | 2.950692 | -0.0575   | 0.014   | 0.591    | 0.059155 | 1.164598 | 13 |
| 9472_at   | YMR160W         | 6.707154 | 6.674941 | 6.975053 | 6.921635 | 6.943942  | 6.403126 | 6.701659 | 6.769057 | 6.959894 | 6.674484 | 6.641858 | 6.836821  | 6.793687 | 6.447573 | 6.710138 | 6.332677 | -0.0767   | -0.0413 | 0.0156   | 0.002992 | 1.25993  | 13 |
| 9473_at   | YMR161W HLJ1    | 8.600904 | 8.189759 | 7.760395 | 7.94046  | 8.505126  | 7.78214  | 8.267671 | 8.193174 | 8.234139 | 8.573931 | 8.284126 | 7.900203  | 7.718723 | 7.963949 | 7.69938  | 8.14822  | -0.0679   | -0.0493 | 0.273    | 0.029493 | 1.259627 | 13 |
| 9474_at   | YMR162C DNF3    | 3.948317 | 4.128935 | 4.791922 | 4.364444 | 4.346669  | 4.128696 | 4.556188 | 4.383655 | 4.480535 | 4.299225 | 4.174322 | 4.763947  | 4.173137 | 4.131224 | 4.490253 | 4.410053 | -5.19E-05 | -0.0383 | 0.657    | 0.065079 | 1.097157 | 13 |
| 9475_at   | YMR163C INP2    | 3.652574 | 3.763644 | 4.464417 | 3.478499 | 3.597463  | 3.869729 | 3.6339   | 3.901773 | 3.421586 | 3.783069 | 3.849002 | 3.719495  | 3.678193 | 3.932398 | 3.441595 | 3.652598 | -0.0398   | 0.039   | 0.545    | 0.054996 | 1.171746 | 13 |
| 9476_at   | YMR164C MSS11   | 6.025609 | 5.901859 | 5.349694 | 5.981196 | 5.899987  | 6.188218 | 6.667573 | 6.055355 | 6.518433 | 6.544186 | 6.271227 | 6.043454  | 6.079439 | 5.736515 | 5.849752 | 6.324482 | 0.038     | -0.14   | 0.0227   | 0.003197 | 1.490288 | 12 |
| 9477_at   | YMR165C PAH1    | 7.547351 | 7.376859 | 7.171789 | 7.625206 | 7.579968  | 7.589006 | 8.458731 | 7.848751 | 8.120738 | 8.759768 | 8.434991 | 8.057276  | 7.424652 | 7.955175 | 7.506287 | 8.206215 | 0.117     | -0.202  | 0.00457  | 0.000791 | 1.967338 | 12 |
| 9478_at   | YMR166C         | 7.262702 | 7.030216 | 6.626138 | 7.728302 | 7.731955  | 7.517248 | 7.939431 | 7.689772 | 7.711664 | 8.224796 | 7.93188  | 7.914812  | 7.701052 | 7.257609 | 6.844879 | 7.954922 | 0.0335    | -0.261  | 1.53E-05 | 6.57E-06 | 1.98986  | 12 |
| 9479_at   | YMR167W MLH1    | 5.081768 | 4.920992 | 3.993571 | 5.028299 | 4.779719  | 5.025064 | 5.0685   | 4.947236 | 5.228324 | 5.301821 | 5.486945 | 5.187512  | 4.689903 | 4.844521 | 4.405568 | 5.202111 | 0.0212    | -0.152  | 0.026    | 0.003612 | 1.495602 | 12 |
| 9480_at   | YMR168C CEP3    | 4.723305 | 4.570937 | 3.535626 | 4.081266 | 4.196051  | 4.281402 | 4.729257 | 4.403042 | 4.642282 | 4.573542 | 4.389467 | 4.173945  | 3.645194 | 3.94104  | 3.900528 | 4.407636 | -0.0843   | -0.0925 | 0.11     | 0.013107 | 1.439002 | 12 |
| 9481_at   | YMR169C ALD3    | 4.687103 | 4.570045 | 4.841831 | 4.796658 | 4.7129257 | 7.10913  | 4.812684 | 7.768665 | 7.797043 | 5.98589  | 6.098508 | 6.457079  | 6.51368  | 7.291449 | 6.814544 | 7.413701 | 0.356     | -0.425  | 0.0226   | 0.00319  | 4.958847 | 10 |
| 9482_g_at | YMR169C ALD3    | 7.340566 | 7.427018 | 7.420485 | 9.49625  | 9.145634  | 8.935967 | 10.35427 | 9.913077 | 10.10846 | 8.605059 | 8.637388 | 8.568676  | 8.120117 | 8.384725 | 8.251951 | 9.523186 | 0.0922    | -0.455  | 0.00372  | 0.000659 | 3.489527 | 11 |
| 9483_at   | YMR170C ALD2    | 6.517509 | 6.595242 | 6.092395 | 6.373351 | 6.199664  | 6.559577 | 6.771802 | 6.167909 | 6.966072 | 5.930711 | 6.041776 | 6.616529  | 5.778672 | 6.095932 | 6.099452 | 6.469345 | 0.00863   | -0.156  | 0.0381   | 0.005082 | 1.471163 | 12 |
| 9484_at   | YMR131C RRB1    | 8.265003 | 8.239161 | 8.149647 | 7.282334 | 7.410768  | 7.677992 | 7.395407 | 6.644295 | 7.019689 | 6.667343 | 6.251503 | 7.11712   | 5.539848 | 6.185346 | 5.011176 | 6.727316 | -0.67     | 0.0371  | 3.3E-06  | 2.06E-06 | 5.911343 | 18 |
| 9485_at   | YMR132C JLP2    | 4.416562 | 4.295515 | 4.870647 | 4.222392 | 4.346779  | 3.853837 | 4.246779 | 4.37609  | 4.300703 | 4.277617 | 3.966024 | 3.703989  | 3.013539 | 3.185731 | 3.114593 | 4.057738 | -0.351    | -0.0702 | 1.52E-05 | 6.56E-06 | 2.534242 | 16 |
| 9486_at   | YMR133W REC114  | 3.005347 | 2.952195 | 3.924752 | 3.117418 | 3.28416   | 2.895019 | 2.897642 | 3.268916 | 2.95729  | 3.070002 | 3.234047 | 3.226453  | 3.194488 | 3.261673 | 3.178695 | 3.086933 | -0.0109   | 0.042   | 0.623    | 0.062065 | 1.126554 | 13 |
| 9487_at   | YMR134W         | 7.366283 | 7.499642 | 7.506998 | 8.070825 | 7.541634  | 6.839476 | 8.163628 | 7.897824 | 7.468768 | 8.582298 | 8.183624 | 8.594342  | 6.580844 | 7.437165 | 6.785684 | 8.079944 | -0.0483   | -0.244  | 0.0279   | 0.003857 | 1.904387 | 12 |
| 9488_at   | YMR135C GID8    | 7.687161 | 7.614262 | 7.454091 | 8.197216 | 8.121676  | 8.221191 | 8.628216 | 8.386636 | 8.582345 | 9.052934 | 8.726151 | 8.959333  | 9.057393 | 9.783191 | 9.512482 | 8.704939 | 0.515     | -0.319  | 6.63E-09 | 2.96E-08 | 3.91154  | 7  |
| 9489_at   | YMR135W-A       | 3.537152 | 3.708855 | 3.100437 | 3.507571 | 3.307645  | 3.992385 | 3.351964 | 3.646187 | 3.791733 | 3.373154 | 3.441802 | 3.196521  | 3.540813 | 3.461538 | 3.285077 | 3.500266 | -0.0308   | -0.0139 | 0.763    | 0.074559 | 1.091624 | 13 |
| 9490_at   | YMR136W GAT2    | 6.525415 | 6.469028 | 6.644178 | 7.434008 | 7.246089  | 7.551368 | 5.230402 | 7.084953 | 7.527214 | 8.185502 | 7.901429 | 8.604946  | 10.0869  | 10.05822 | 10.28134 | 7.993114 | 0.924     | 0.0999  | 5.24E-10 | 8.26E-09 | 11.57509 | 6  |
| 9491_at   | YMR137C PSO2    | 4.566174 | 4.496979 | 4.240163 | 5.034195 | 4.74416   | 4.809649 | 4.241704 | 4.925081 | 4.796539 | 5.096941 | 4.759058 | 4.699232  | 4.696531 | 4.995257 | 4.610555 | 4.98442  | 0.0806    | -0.105  | 0.00845  | 0.001343 | 1.467797 | 13 |
| 9492_at   | YMR138W CIN4    | 7.042791 | 7.107149 | 7.327582 | 6.584953 | 6.740975  | 6.895145 | 6.598087 | 6.431446 | 6.384332 | 6.78923  | 6.410513 | 5.984308  | 6.925324 | 6.709945 | 6.584069 | 6.403212 | -0.111    | 0.15    | 0.009915 | 0.000197 | 1.717933 | 14 |
| 9493_at   | YMR139W RIM11   | 7.156296 | 7.028855 | 6.84956  | 7.470213 | 7.447429  | 7.268551 | 7.640625 | 7.394634 | 7.624153 | 7.752336 | 7.623515 | 7.986167  | 7.701475 | 7.339848 | 7.650512 | 7.708109 | 0.173     | -0.108  | 4.91E-06 | 2.77E-06 | 1.717911 | 9  |
| 9494_at   | YMR140W SIP5    | 7.229236 | 6.522033 | 6.02368  | 6.678245 | 6.334055  | 6.537933 | 7.005783 | 7.32608  | 7.711894 | 7.069727 | 7.438982 | 6.971389  | 7.088539 | 6.754822 | 6.782106 | 7.096343 | 0.105     | -0.109  | 0.213    | 0.023598 | 1.540908 | 13 |
| 9495_at   | YMR141C         | 4.420239 | 4.83197  | 4.476653 | 4.288675 | 4.534226  | 4.832165 | 4.775624 | 4.32126  | 4.617429 | 4.582664 | 4.61638  | 4.4774375 | 5.085005 | 5.899125 | 5.867523 | 4.641897 | 0.254     | 0.125   | 0.000382 | 0.34E-05 | 1.201462 | 8  |
| 9496_at   | YMR142C RPL13B  | 11.03311 | 11.12865 | 11.43951 | 10.      |           |          |          |          |          |          |          |           |          |          |          |          |           |         |          |          |          |    |

|         |                |          |          |          |          |          |          |          |          |          |          |          |           |          |          |          |          |          |          |          |          |          |         |   |
|---------|----------------|----------|----------|----------|----------|----------|----------|----------|----------|----------|----------|----------|-----------|----------|----------|----------|----------|----------|----------|----------|----------|----------|---------|---|
| 9527_at | YMR128W ECM16  | 6.11862  | 6.56825  | 6.815276 | 5.887227 | 5.999982 | 5.884279 | 6.234738 | 6.233376 | 5.663117 | 5.837144 | 5.666024 | 5.584382  | 5.173041 | 5.706504 | 5.323031 | 5.764324 | -0.273   | 0.0475   | 0.000583 | 0.000134 | 2.064629 | 16      |   |
| 9528_at | YMR129W POM152 | 7.09445  | 7.154557 | 6.683705 | 6.695526 | 7.619495 | 6.470737 | 7.036528 | 6.663531 | 6.488124 | 6.666878 | 6.803216 | 6.879051  | 6.48101  | 7.204381 | 6.395558 | 6.672108 | -0.0539  | 0.0415   | 0.443    | 0.045682 | 1.205637 | 13      |   |
| 9529_at | YMR130W        | 5.51746  | 5.625658 | 6.195477 | 5.448408 | 5.026639 | 5.413473 | 5.626041 | 5.177386 | 5.110887 | 5.406315 | 5.068336 | 5.332601  | 4.559593 | 4.888233 | 4.623249 | 5.253675 | -0.265   | -0.00673 | 0.000338 | 8.42E-05 | 2.019997 | 16      |   |
| 9530_at | YMR088C VBA1   | 6.956197 | 6.827611 | 6.805686 | 7.079193 | 7.122058 | 6.554446 | 7.289778 | 6.847661 | 7.102039 | 6.710747 | 6.446889 | 6.805835  | 5.759486 | 5.708086 | 5.686176 | 6.84628  | -0.301   | -0.153   | 0.12E-06 | 1.48E-06 | 2.434393 | 15      |   |
| 9531_at | YMR089C YTA12  | 7.881778 | 7.916283 | 7.544683 | 6.82785  | 6.573246 | 7.997117 | 9.007607 | 8.846801 | 8.801408 | 8.935506 | 9.611081 | 9.126374  | 9.245094 | 9.058469 | 8.588812 | 9.187044 | 0.357    | -0.23    | 9.25E-05 | 2.87E-05 | 3.096663 | 9       |   |
| 9532_at | YMR090W        | 8.055471 | 7.886365 | 8.566219 | 7.79263  | 8.693457 | 8.992128 | 10.18844 | 10.18699 | 10.4582  | 10.25147 | 10.11692 | 10.466739 | 9.443326 | 9.535034 | 9.992563 | 10.454   | 0.362    | -0.42    | 5.22E-07 | 5.29E-07 | 4.93912  | 10      |   |
| 9533_at | YMR091C NPL6   | 6.883963 | 6.865788 | 7.182718 | 6.524778 | 6.849128 | 6.118984 | 6.180737 | 6.420095 | 5.751632 | 6.14051  | 5.622572 | 5.255692  | 5.86523  | 5.966549 | 5.749912 | 5.902989 | -0.32    | 0.146    | 0.000382 | 9.34E-05 | 2.379124 | 14      |   |
| 9534_at | YMR092C AIP1   | 7.639495 | 7.595871 | 8.469979 | 7.431209 | 8.579696 | 7.369355 | 8.328279 | 7.229766 | 7.159823 | 8.08982  | 6.724054 | 6.861412  | 6.254113 | 6.391615 | 5.826204 | 7.408522 | -0.456   | -0.103   | 0.00292  | 0.000532 | 3.34837  | 17      |   |
| 9535_at | YMR093W UTP15  | 6.788349 | 6.614251 | 7.046157 | 6.359123 | 6.65827  | 6.039811 | 6.307645 | 6.318641 | 6.056678 | 6.067638 | 5.868791 | 5.640559  | 4.57568  | 5.315834 | 4.66275  | 5.994314 | -0.428   | -0.00375 | 1.03E-05 | 4.83E-06 | 3.10945  | 16      |   |
| 9536_at | YMR094W CTF13  | 3.69423  | 3.534426 | 5.012564 | 3.304617 | 3.666737 | 3.222289 | 3.729557 | 3.766798 | 3.478309 | 3.35887  | 3.072501 | 3.457918  | 3.109162 | 3.310509 | 3.195504 | 3.349404 | -0.214   | 0.0759   | 0.00395  | 0.005253 | 1.763768 | 16      |   |
| 9537_at | YMR095C SNO1   | 5.25574  | 5.157347 | 5.994535 | 4.992327 | 5.130635 | 5.03486  | 5.174646 | 5.253789 | 5.086668 | 5.006752 | 5.380256 | 5.156128  | 4.093135 | 4.308772 | 4.318669 | 5.080745 | -0.277   | -0.0679  | 0.000559 | 0.000129 | 2.085301 | 16      |   |
| 9538_at | YMR096W SNZ1   | 7.416199 | 7.323379 | 7.511553 | 7.993406 | 8.008135 | 8.186841 | 8.24014  | 8.394481 | 8.012906 | 7.399943 | 8.252186 | 8.495942  | 7.020642 | 7.387195 | 7.282293 | 8.191551 | -0.0606  | -0.237   | 0.000469 | 0.000112 | 1.91072  | 12      |   |
| 9539_at | YMR097C MTG1   | 5.416972 | 5.43541  | 6.05026  | 5.326248 | 5.472093 | 4.971279 | 5.647602 | 5.426096 | 5.105346 | 5.276152 | 5.400213 | 5.22065   | 4.99626  | 5.191212 | 4.692515 | 5.26729  | -0.154   | 0.00435  | 0.00348  | 0.004699 | 1.505493 | 16      |   |
| 9540_at | YMR098C        | 4.947041 | 4.891126 | 5.171041 | 5.316268 | 5.387978 | 4.83324  | 5.807276 | 5.419601 | 5.021208 | 5.259313 | 5.86547  | 5.463712  | 4.662647 | 5.092743 | 4.262221 | 5.441326 | -0.057   | -0.17    | 0.0162   | 0.002372 | 1.628534 | 12      |   |
| 9541_at | YMR099C        | 8.572419 | 8.599388 | 9.057642 | 8.630114 | 8.626928 | 8.534562 | 8.871545 | 8.599353 | 8.826825 | 8.343057 | 8.238173 | 8.454641  | 6.917046 | 6.810872 | 6.978908 | 8.494666 | -0.462   | -0.188   | 9.84E-09 | 3.80E-08 | 3.567929 | 17      |   |
| 9542_at | YMR100W SRT1   | 7.593003 | 7.036027 | 6.351511 | 7.480838 | 7.377888 | 6.981014 | 7.467764 | 7.69121  | 7.569392 | 8.411746 | 8.654522 | 8.661564  | 10.04107 | 9.606169 | 9.470007 | 8.061283 | 0.746    | 0.0741   | 4.44E-07 | 4.69E-07 | 7.229618 | 7       |   |
| 9543_at | YMR101C MUB1   | 3.927705 | 4.242988 | 4.853725 | 4.062841 | 4.01447  | 4.001978 | 4.412519 | 4.48156  | 3.995198 | 4.833334 | 4.648721 | 4.631569  | 8.01294  | 6.706166 | 7.284483 | 4.446375 | 0.763    | 0.383    | 8.62E-08 | 1.56E-07 | 9.429795 | 5       |   |
| 9544_at | YMR102C        | 6.926475 | 6.672743 | 6.754703 | 7.405229 | 7.388383 | 6.413157 | 7.224581 | 7.136703 | 7.472004 | 8.051807 | 8.046803 | 8.286328  | 10.21127 | 9.376999 | 10.36813 | 7.787608 | 0.857    | -0.168   | 9.91E-08 | 1.71E-07 | 9.704035 | 6       |   |
| 9545_at | YMR103C        | 7.252232 | 7.055336 | 6.962756 | 7.97675  | 7.993980 | 7.569511 | 8.452804 | 8.324051 | 8.1038   | 9.085314 | 8.864957 | 8.787742  | 9.112724 | 9.651666 | 8.790898 | 8.628483 | 0.567    | -0.131   | 3.05E-07 | 3.59E-07 | 4.49169  | 7       |   |
| 9546_at | YMR104C YPK2   | 4.788843 | 4.719513 | 5.034446 | 4.83511  | 4.72729  | 4.72729  | 4.524163 | 5.78805  | 5.543692 | 5.640091 | 5.977874 | 6.018972  | 5.433032 | 5.765864 | 5.290737 | 5.640013 | 0.551088 | 0.241    | -0.106   | 0.0167   | 0.002438 | 1.90366 | 9 |
| 9547_at | YMR105C PGM2   | 7.75272  | 7.68735  | 7.54297  | 9.851961 | 9.47714  | 9.294935 | 9.900281 | 9.68674  | 10.00792 | 9.929631 | 9.815005 | 9.963103  | 8.813549 | 9.124207 | 9.115514 | 9.72944  | 0.228    | -0.364   | 0.00184  | 0.00358  | 3.478791 | 10      |   |
| 9548_at | YMR106C YKU80  | 4.355402 | 4.676111 | 4.047189 | 4.299884 | 4.207541 | 4.421535 | 4.315313 | 4.279825 | 4.781646 | 4.297398 | 4.590821 | 3.944045  | 4.027297 | 4.038642 | 4.144354 | 4.340051 | -0.0754  | -0.0354  | 0.184    | 0.020703 | 1.242441 | 13      |   |
| 9549_at | YMR107W SPG4   | 7.833321 | 7.663294 | 7.700623 | 7.221712 | 7.058277 | 7.33275  | 7.196597 | 7.08714  | 7.30705  | 7.266387 | 7.438146 | 8.982972  | 9.279047 | 8.579074 | 8.994938 | 7.157099 | 0.297    | 0.326    | 2.41E-07 | 3.01E-07 | 3.534574 | 8       |   |
| 9550_at | YMR108W LV2    | 8.554039 | 8.233105 | 8.321442 | 7.924981 | 8.007624 | 7.621439 | 8.140181 | 7.760566 | 8.438581 | 8.595997 | 8.145264 | 7.969814  | 8.77687  | 8.33694  | 8.442881 | 8.509784 | 0.0698   | 0.0996   | 0.064    | 0.008098 | 1.418348 | 13      |   |
| 9551_at | YMR109W MYO5   | 6.843929 | 6.809252 | 6.39502  | 6.611376 | 6.29043  | 6.789602 | 6.256022 | 6.116988 | 6.278711 | 5.927873 | 6.122386 | 5.979073  | 6.056986 | 6.472238 | 5.783377 | 6.148451 | -0.172   | 0.0709   | 0.00624  | 0.001035 | 1.577118 | 11      |   |
| 9552_at | YMR110C HFD1   | 9.244867 | 9.29131  | 8.852234 | 9.923124 | 9.834041 | 9.220589 | 10.09385 | 9.72605  | 9.975551 | 10.42637 | 10.24494 | 10.40268  | 9.247138 | 9.337342 | 9.05739  | 10.14289 | 0.0657   | -0.272   | 0.000196 | 5.33E-05 | 2.143229 | 12      |   |
| 9553_at | YMR068W AV2    | 5.259283 | 5.042197 | 5.792496 | 5.648168 | 5.462502 | 5.193018 | 6.012665 | 6.079299 | 5.792522 | 6.669296 | 7.121701 | 6.345733  | 5.002052 | 5.296727 | 4.875349 | 6.194145 | 0.0218   | -0.283   | 0.0118   | 0.001801 | 2.052234 | 12      |   |
| 9554_at | YMR069W NAO4   | 5.7872   | 5.264378 | 5.913787 | 5.983316 | 5.143552 | 5.123867 | 6.15756  | 5.890259 | 5.592367 | 5.875379 | 6.514788 | 5.071074  | 5.843644 | 6.091573 | 5.802277 | 5.745206 | 0.0454   | -0.0191  | 0.871    | 0.003805 | 1.127813 | 13      |   |
| 9555_at | YMR070W MOT3   | 5.443319 | 5.371069 | 5.946825 | 5.741575 | 5.513176 | 5.188621 | 6.058977 | 5.751601 | 5.476163 | 6.80799  | 6.762446 | 6.037867  | 5.433645 | 5.74857  | 5.620223 | 6.044701 | 0.0628   | -0.151   | 0.155    | 0.017784 | 1.593731 | 10      |   |
| 9556_at | YMR071C TVP18  | 9.675319 | 9.635411 | 9.864273 | 9.620729 | 9.598986 | 9.357934 | 9.376377 | 9.126221 | 9.967732 | 8.744604 | 8.690646 | 8.931263  | 8.706717 | 9.003792 | 8.60737  | 9.027229 | -0.282   | 0.0664   | 0.000111 | 0.33E-05 | 2.110779 | 16      |   |
| 9557_at | YMR072W ABF2   | 8.424788 | 8.570052 | 8.488318 | 8.640645 | 8.43977  | 8.452448 | 7.775481 | 7.691808 | 8.070905 | 7.558139 | 7.691753 | 8.231881  | 7.457621 | 7.84646  | 7.248389 | 9.736707 | -0.272   | 0.025    | 0.00216  | 0.000413 | 2.059126 | 16      |   |
| 9558_at | YMR073C IRC21  | 7.587535 | 7.657372 | 7.79188  | 7.863779 | 7.842638 | 7.571785 | 8.094058 | 7.940156 | 8.0957   | 8.013199 | 8.091085 | 8.104935  | 8.615221 | 7.0056   | 7.06658  | 8.019972 | -0.157   | -0.196   | 1.46E-06 | 1.13E-06 | 2.056635 | 15      |   |
| 9559_at | YMR074C        | 8.821816 | 8.869902 | 9.282505 | 9.032425 | 9.012547 | 9.117348 | 9.092737 | 8.918301 | 9.130083 | 9.08352  | 8.961066 | 9.803859  | 7.027833 | 7.914485 | 7.73481  | 9.003816 | -0.294   | -0.171   | 2.02E-07 | 2.72E-07 | 2.482735 | 15      |   |
| 9560_at | YMR075W RCO1   | 4.491781 | 4.753304 | 5.080566 | 5.043025 | 4.907569 | 5.452439 | 5.12307  | 5.202236 | 4.754261 | 6.112365 | 5.808321 | 6.568871  | 6.028035 | 6.044934 | 5.89947  | 5.399701 | 0.373    | -0.0111  | 0.000174 | 4.83E-05 | 2.687161 | 7       |   |
| 9561_at | YMR075C-A      | 4.239911 | 4.642028 | 3.219923 | 3.862027 | 4.138502 | 4.285015 | 4.751612 | 4.223385 | 4.447252 | 4.960927 | 4.937114 | 4.30744   | 4.963438 | 5.230767 | 4.597842 | 4.550346 | 0.257    | -0.0232  | 0.0252   | 0.003522 | 1.978727 | 10      |   |
| 9562_at | YMR076C PDS5   | 5.086304 | 5.434768 | 5.305094 | 5.71429  | 5.392922 | 5.347297 | 5.662114 | 5.016818 | 5.403098 | 5.396429 | 5.231103 | 5.300564  | 4.520652 | 5.121411 | 4.902846 | 5.379963 | -0.116   | -0.0856  | 0.00943  | 0.001475 | 1.887743 | 9       |   |
| 9563_at | YMR077C VPS20  | 6.931065 | 6.976257 | 7.099258 | 7.310862 | 7.203828 | 6.813813 | 7.708261 | 7.299471 | 7.185078 | 8.013804 | 7.494277 | 6.713661  | 7.183897 | 6.990686 | 6.538182 | 7.363516 | -0.00712 | -0.116   | 0.17     | 0.019342 | 1.333592 | 12      |   |
| 9564_at | YMR078C CTF18  | 4.025543 | 4.751992 | 4.682049 | 4.383667 | 4.224753 | 4.467606 | 3.99958  | 3.789199 | 3.852904 | 3.762582 | 3.544846 | 3.65615   | 3.765285 | 3.705093 | 3.315918 | 3.789777 | -0.325   | 0.0775   | 3.73E-06 | 2.26E-06 | 2.366828 | 16      |   |
| 9565_at | YMR079W SEC14  | 10.44426 | 9.835712 | 8.771272 | 9.400092 | 9.242221 | 9.526183 | 8.711745 | 8.86041  | 9.024538 | 8.459778 | 8.579335 | 8.897331  | 7.39044  | 7.962728 | 8.082038 | 8.837428 | -0.423   | -0.0213  | 0.00017  | 4.74E-05 | 3.067814 | 16      |   |
| 9566_at | YMR080C NAM7   | 6.55546  | 6.354545 | 5.00881  | 5.66129  | 5.809478 | 5.616882 | 6.096504 | 5.988517 | 6.08401  | 5.827942 | 5.863372 | 6.027793  | 7.033147 | 9.020307 | 6.313389 | 5.90097  | 0.117    | 0.0775   | 0.239    | 0.026142 | 1.463685 | 10      |   |
| 9567_at | YMR081C INF1   | 7.459424 | 6.933087 | 5.948379 | 8.299898 | 8.109004 | 7.536888 | 8.249179 | 8.605308 | 8.927932 | 8.324711 | 8.303255 | 8.677918  | 9.614348 | 9.115178 | 10.37546 | 8.63733  | 0.698    | -0.104   | 0.000184 | 5.07E-05 | 6.364008 | 6       |   |
| 9568_at | YMR082C        | 4.430272 | 4.3      |          |          |          |          |          |          |          |          |          |           |          |          |          |          |          |          |          |          |          |         |   |

|         |               |          |          |          |          |          |          |          |          |           |          |          |          |           |           |          |          |         |         |          |          |          |    |
|---------|---------------|----------|----------|----------|----------|----------|----------|----------|----------|-----------|----------|----------|----------|-----------|-----------|----------|----------|---------|---------|----------|----------|----------|----|
| 9599_at | YMR022W UBC7  | 8.98182  | 9.20781  | 9.498593 | 9.507004 | 9.370375 | 9.835928 | 9.425834 | 9.305438 | 9.398125  | 9.390689 | 9.724816 | 9.936059 | 9.284298  | 9.6371545 | 9.509934 | 9.593302 | 0.0486  | -0.0767 | 0.101    | 0.012122 | 1.301617 | 13 |
| 9600_at | YMR023C MSS1  | 5.909616 | 5.639847 | 5.851878 | 6.294976 | 6.447266 | 5.831272 | 6.683628 | 6.460652 | 6.261658  | 7.28288  | 6.558957 | 6.740782 | 6.492569  | 6.665825  | 6.194696 | 6.65737  | 0.2     | -0.15   | 0.00179  | 0.00035  | 1.980597 | 9  |
| 9601_at | YMR024W MRPL3 | 7.645231 | 7.776707 | 7.978748 | 8.569248 | 8.603613 | 8.666797 | 8.499851 | 8.283349 | 8.366225  | 8.378965 | 8.207603 | 8.396877 | 7.557057  | 7.976526  | 7.785989 | 8.497532 | -0.0377 | -0.189  | 0.000194 | 5.31E-05 | 1.645572 | 12 |
| 9602_at | YMR025W CS1   | 5.297794 | 5.200342 | 6.075015 | 5.553218 | 5.567123 | 5.323956 | 5.105763 | 4.984399 | 4.993598  | 5.135735 | 4.987968 | 5.032252 | 5.155494  | 5.061036  | 4.935273 | 5.091267 | -0.135  | 0.058   | 0.047    | 0.006134 | 1.430987 | 16 |
| 9603_at | YMR026C PEX12 | 6.410946 | 6.248324 | 6.617147 | 6.29924  | 6.429356 | 5.943111 | 6.387023 | 6.552621 | 6.390697  | 6.637601 | 6.390558 | 6.504898 | 6.334668  | 6.427245  | 6.14079  | 6.405613 | -0.0113 | -0.0136 | 0.868    | 0.003528 | 1.052109 | 13 |
| 9604_at | YMR027W       | 8.273623 | 8.381584 | 8.614316 | 8.472306 | 8.516113 | 8.13787  | 8.765454 | 8.525826 | 8.341225  | 9.074746 | 8.674884 | 8.825331 | 8.803629  | 8.799704  | 8.930465 | 8.657818 | 0.139   | -0.0104 | 0.0149   | 0.002211 | 1.446595 | 13 |
| 9605_at | YMR028W TAP42 | 5.054808 | 5.013822 | 6.050954 | 5.05275  | 5.003128 | 4.499543 | 5.246635 | 5.128566 | 4.71915   | 5.4959   | 5.200471 | 5.289505 | 5.478206  | 5.459158  | 4.940617 | 5.066949 | 0.0265  | 0.066   | 0.52     | 0.052643 | 1.218226 | 13 |
| 9606_at | YMR029C FAR8  | 5.553164 | 5.356202 | 6.312242 | 6.056487 | 5.960211 | 5.226338 | 6.044283 | 5.603215 | 5.619417  | 5.310217 | 5.220339 | 5.501956 | 4.877023  | 5.02225   | 5.063761 | 5.516584 | -0.205  | -0.0422 | 0.0108   | 0.001663 | 1.723063 | 16 |
| 9607_at | YMR030W RSF1  | 4.245794 | 4.564302 | 5.731053 | 5.377358 | 5.05826  | 4.97915  | 5.379985 | 5.383341 | 5.062524  | 5.849615 | 5.546386 | 5.596317 | 5.324355  | 5.538733  | 5.642032 | 5.623668 | 0.224   | -0.129  | 0.0449   | 0.0059   | 1.956535 | 9  |
| 9608_at | YMR031C       | 6.687297 | 6.740136 | 6.686116 | 6.998425 | 6.864242 | 6.311463 | 6.983267 | 6.79925  | 6.730427  | 6.115232 | 5.810224 | 6.221205 | 5.600916  | 5.867415  | 5.433769 | 6.464681 | -0.319  | -0.0731 | 0.000158 | 4.45E-05 | 2.327017 | 16 |
| 9609_at | YMR031W-A     | 3.2659   | 3.149125 | 4.308585 | 3.26757  | 3.287807 | 3.172307 | 3.42349  | 3.206739 | 3.021212  | 3.175849 | 4.068252 | 3.140815 | 3.047352  | 3.271525  | 3.121556 | 3.281389 | -0.0756 | 0.0177  | 0.61     | 0.060864 | 1.221922 | 13 |
| 9610_at | YMR032W HOF1  | 6.466183 | 6.659644 | 6.603209 | 5.797803 | 6.526918 | 5.334357 | 4.601486 | 4.184711 | 4.4300931 | 3.706117 | 4.410524 | 3.901569 | 3.791443  | 4.04265   | 3.715404 | 4.238674 | -0.735  | 0.275   | 8.81E-07 | 7.69E-07 | 1.701358 | 18 |
| 9611_at | YMR033W ARP9  | 8.119755 | 8.010853 | 8.024684 | 7.742073 | 7.748253 | 7.37542  | 7.441551 | 7.303726 | 7.197512  | 7.307526 | 8.266004 | 7.237529 | 8.327259  | 8.169583  | 7.754227 | 7.44418  | 0.0224  | 0.171   | 0.0148   | 0.002191 | 1.546821 | 13 |
| 9612_at | YMR034C       | 6.016395 | 5.831992 | 6.193874 | 6.446879 | 6.30756  | 6.418355 | 6.576983 | 6.546771 | 6.430385  | 6.570024 | 7.029957 | 6.856335 | 7.448352  | 7.161741  | 6.813475 | 6.69934  | 0.296   | -0.0335 | 1.32E-05 | 5.88E-06 | 2.190787 | 7  |
| 9613_at | YMR035W IMP2  | 7.988739 | 7.743647 | 8.068446 | 8.288464 | 8.469545 | 8.178684 | 8.231974 | 7.828145 | 7.971887  | 7.513196 | 7.375946 | 7.517003 | 6.357639  | 6.490332  | 6.341185 | 7.837631 | -0.437  | -0.178  | 9.39E-08 | 1.64E-07 | 3.335532 | 17 |
| 9614_at | YMR036C MIH1  | 5.243262 | 5.541381 | 5.803241 | 5.361051 | 5.573797 | 4.792681 | 5.795217 | 5.729066 | 5.627655  | 6.142107 | 6.04686  | 6.084245 | 7.041729  | 6.60753   | 6.593495 | 5.791265 | 0.355   | 0.088   | 0.00011  | 3.30E-05 | 2.561685 | 8  |
| 9615_at | YMR037C MSN2  | 9.124201 | 7.74512  | 7.063159 | 7.651313 | 7.573493 | 7.196735 | 7.952217 | 7.749381 | 7.852334  | 8.219655 | 8.309649 | 8.091568 | 8.296622  | 8.123484  | 7.914516 | 7.909511 | 0.178   | -0.0248 | 0.0326   | 0.004429 | 1.604347 | 13 |
| 9616_at | YMR038C CCSI1 | 10.09438 | 10.09702 | 10.12612 | 9.577094 | 9.760325 | 9.303186 | 9.224241 | 9.13247  | 9.116529  | 9.245427 | 9.021208 | 8.697783 | 7.942037  | 8.267507  | 7.936942 | 9.048747 | -0.519  | 0.00765 | 1.05E-07 | 1.77E-07 | 3.960909 | 18 |
| 9617_at | YMR039C SSB   | 9.10598  | 9.382158 | 9.274018 | 8.447756 | 8.526259 | 8.004745 | 9.309779 | 8.950869 | 8.332181  | 9.236697 | 8.632989 | 8.318515 | 8.689115  | 8.909553  | 8.562709 | 8.58513  | -0.0917 | 0.101   | 0.235    | 0.025753 | 1.478269 | 13 |
| 9618_at | YMR040W YET2  | 7.830909 | 7.717609 | 7.580415 | 8.475914 | 8.609576 | 8.376243 | 9.167301 | 8.994676 | 8.57532   | 9.361061 | 9.218513 | 9.003936 | 9.705548  | 10.17468  | 9.437425 | 9.101769 | 0.527   | -0.0989 | 5.56E-07 | 5.50E-07 | 4.0454   | 7  |
| 9619_at | YMR041C ARA2  | 5.698244 | 5.786835 | 4.829608 | 5.841154 | 5.833895 | 6.127935 | 6.160684 | 5.758733 | 6.29312   | 6.195017 | 6.162089 | 6.371531 | 7.733018  | 7.432014  | 7.18281  | 6.624486 | 0.492   | 0.0634  | 1.24E-05 | 5.62E-06 | 3.698664 | 7  |
| 9620_at | YML003W       | 3.327812 | 2.794912 | 4.318098 | 2.88101  | 2.89976  | 2.803936 | 3.410878 | 3.149775 | 3.112234  | 3.241886 | 2.993149 | 2.925986 | 2.944483  | 2.753488  | 2.89658  | 2.99629  | -0.13   | 0.0417  | 0.235    | 0.025769 | 1.412167 | 16 |
| 9621_at | YML002W       | 6.31247  | 6.173981 | 6.208485 | 6.412699 | 6.41597  | 6.365256 | 6.949681 | 6.744766 | 6.612706  | 6.429928 | 6.62845  | 7.025118 | 6.67464   | 6.891392  | 6.535563 | 6.701589 | 0.124   | -0.0668 | 0.0118   | 0.001797 | 1.433874 | 13 |
| 9622_at | YML001W YPT7  | 8.898975 | 8.839017 | 9.032882 | 8.578636 | 8.710472 | 8.396991 | 8.375786 | 7.953717 | 8.2596    | 7.584356 | 8.129544 | 7.876926 | 6.583758  | 6.933161  | 6.849929 | 8.026477 | -0.531  | -0.0343 | 2.04E-08 | 5.92E-08 | 4.087991 | 18 |
| 9623_at | YMR001C CDC5  | 7.656843 | 7.832705 | 7.921125 | 7.253703 | 7.18419  | 6.510937 | 6.818169 | 6.35012  | 5.858095  | 6.420811 | 6.913781 | 6.219246 | 6.354396  | 6.436351  | 6.06249  | 6.400209 | -0.369  | 0.176   | 0.000597 | 0.000137 | 2.773489 | 14 |
| 9624_at | YMR002W MIC17 | 10.05445 | 9.493065 | 8.62819  | 10.59772 | 10.62081 | 10.10188 | 11.12943 | 11.19518 | 10.88948  | 11.82677 | 11.39256 | 11.39405 | 11.18269  | 11.415533 | 10.81977 | 11.40743 | 0.495   | -0.319  | 0.000036 | 1.32E-05 | 4.798791 | 10 |
| 9625_at | YMR003W       | 6.683659 | 6.792287 | 6.999315 | 6.76801  | 6.610589 | 6.364551 | 6.109968 | 6.195719 | 5.564876  | 6.06678  | 5.756207 | 6.012202 | 6.149996  | 6.473457  | 6.176503 | 6.289931 | -0.112  | 0.0704  | 0.416    | 0.030108 | 1.418819 | 16 |
| 9626_at | YMR004W MVP1  | 7.282526 | 7.380132 | 7.528761 | 7.549343 | 7.618347 | 7.314087 | 7.67264  | 7.59415  | 7.189137  | 7.57891  | 7.860312 | 7.913669 | 8.3137916 | 7.54442   | 7.606666 | 6.143    | 0.0148  | 0.0188  | 0.002711 | 1.460377 | 13       |    |
| 9627_at | YMR005W TAF4  | 6.607473 | 6.856491 | 7.440642 | 6.75114  | 6.880646 | 6.564002 | 6.850648 | 6.730286 | 6.424421  | 7.023689 | 6.630992 | 6.767052 | 6.550575  | 6.937472  | 6.383975 | 6.705497 | -0.0691 | 0.0227  | 0.421    | 0.043626 | 1.200973 | 13 |
| 9628_at | YMR006C SLB2  | 10.53149 | 10.31592 | 9.824073 | 9.856197 | 9.825438 | 9.618894 | 9.218598 | 8.717860 | 9.209677  | 9.822819 | 9.014821 | 9.104821 | 9.008475  | 9.505787  | 9.95895  | 9.088901 | -0.13   | 0.265   | 0.000563 | 0.00013  | 2.341051 | 14 |
| 9629_at | YMR007W       | 5.887485 | 6.001221 | 6.186137 | 5.748416 | 5.956899 | 6.424869 | 5.254017 | 5.219021 | 4.951848  | 4.709754 | 4.918526 | 4.68235  | 4.963572  | 5.604773  | 5.255203 | 5.1192   | -0.265  | 0.158   | 0.00716  | 0.001166 | 2.244336 | 12 |
| 9630_at | YMR008C PLB1  | 10.12205 | 10.02541 | 9.439991 | 9.903375 | 9.898448 | 9.733213 | 10.5622  | 10.31129 | 10.31622  | 10.34088 | 10.39262 | 10.3914  | 9.486426  | 9.699848  | 10.09041 | 10.28728 | 0.00618 | -0.138  | 0.0374   | 0.005014 | 1.408676 | 14 |
| 9631_at | YMR009W ADI1  | 7.746301 | 7.489227 | 7.338879 | 6.359286 | 7.977041 | 7.338426 | 8.428086 | 8.441359 | 8.173661  | 9.581347 | 9.622175 | 9.542279 | 8.792158  | 8.979208  | 9.10879  | 8.890997 | 0.473   | -0.19   | 0.000397 | 9.65E-05 | 3.502582 | 7  |
| 9632_at | YMR010W       | 6.537231 | 6.800409 | 6.878111 | 6.519339 | 6.571855 | 6.870681 | 6.210342 | 6.844966 | 6.465692  | 7.299244 | 6.732698 | 7.097718 | 8.005428  | 7.743787  | 8.55889  | 6.868602 | 0.458   | 0.256   | 3.22E-05 | 1.21E-05 | 4.046665 | 8  |
| 9633_at | YMR011W HXT2  | 8.855089 | 8.521785 | 6.231441 | 6.444453 | 7.302854 | 6.486967 | 6.557014 | 6.845498 | 6.875294  | 6.918217 | 6.253172 | 5.763592 | 6.063289  | 7.786943  | 7.463854 | 6.639988 | -0.0643 | 0.321   | 0.128    | 0.015033 | 2.410647 | 14 |
| 9634_at | YMR012W CLU1  | 8.374926 | 8.3452   | 8.009633 | 8.228821 | 8.347718 | 8.552641 | 8.517035 | 7.869962 | 8.315123  | 7.63926  | 7.687767 | 7.783339 | 6.934254  | 7.233781  | 6.678973 | 8.102711 | -0.365  | -0.11   | 6.68E-06 | 3.49E-06 | 2.632736 | 15 |
| 9635_at | YMR013C SEC59 | 6.098618 | 5.757106 | 5.489374 | 5.749594 | 5.83249  | 5.829748 | 5.977462 | 5.307958 | 5.696021  | 5.962396 | 5.747254 | 5.735312 | 5.773497  | 6.097509  | 6.310974 | 5.760679 | 0.0715  | 0.0452  | 0.157    | 0.018031 | 1.256503 | 13 |
| 9636_at | YMR014W BUD22 | 6.151916 | 6.342523 | 6.670727 | 5.968565 | 5.477372 | 5.94845  | 5.842331 | 5.802689 | 5.488143  | 5.846218 | 5.181266 | 5.176578 | 4.893257  | 5.289847  | 4.914378 | 5.41073  | -0.351  | 0.0818  | 8.85E-06 | 4.32E-06 | 2.538545 | 16 |
| 9637_at | YMR015C ERG5  | 10.34461 | 10.38417 | 9.56246  | 10.93103 | 10.75963 | 10.60007 | 11.16961 | 11.04211 | 11.26773  | 11.49683 | 11.45293 | 11.66099 | 10.34464  | 11.09579  | 10.81986 | 11.35553 | 0.203   | -0.259  | 0.00018  | 4.97E-05 | 5.298237 | 9  |
| 9638_at | YMR016C SOK2  | 6.876123 | 6.614705 | 6.793215 | 6.728431 | 6.700947 | 6.652815 | 6.384413 | 6.718716 | 6.482393  | 6.496233 | 6.774349 | 6.506399 | 6.55094   | 6.774706  | 6.550691 | 6.574717 | -0.0351 | 0.0334  | 0.195    | 0.021881 | 1.147316 | 16 |
| 9639_at | YMR017W SPO20 | 3.81674  | 3.697974 | 3.641289 | 4.055967 | 4.117263 | 4.183269 | 3.9982   | 4.358286 | 4.125119  | 4.339157 | 4.13983  | 3.84428  | 3.809942  | 3.863952  | 3.666246 | 4.185116 | 0.00458 | -0.118  | 0.00137  | 0.000279 | 1.338927 | 12 |
| 9640_at | YMR018W       | 3.466039 | 3.029077 | 3.132178 | 2.870843 | 3.06     |          |          |          |           |          |          |          |           |           |          |          |         |         |          |          |          |    |

|           |                |           |          |          |          |          |          |          |          |          |          |          |          |          |          |          |          |          |          |          |          |          |    |
|-----------|----------------|-----------|----------|----------|----------|----------|----------|----------|----------|----------|----------|----------|----------|----------|----------|----------|----------|----------|----------|----------|----------|----------|----|
| 9673_at   | YML035C AMD1   | 6.557509  | 6.446455 | 6.43408  | 6.70914  | 6.709189 | 6.630061 | 7.193364 | 7.018996 | 7.038233 | 6.635756 | 6.730911 | 7.088889 | 6.134153 | 6.124605 | 6.161504 | 6.914319 | -0.084   | -0.168   | 6.19E-05 | 2.05E-05 | 1.70232  | 12 |
| 9674_at   | YML034C-A      | 4.68785   | 4.52845  | 5.477999 | 4.456756 | 4.609125 | 4.490162 | 4.260262 | 4.507899 | 4.575602 | 4.284623 | 4.593222 | 4.140698 | 4.550143 | 4.55747  | 4.396908 | 4.356774 | -0.102   | 0.0936   | 0.0341   | 0.004615 | 1.477505 | 13 |
| 9675_at   | YML034W SRC1   | 5.7110911 | 5.090438 | 5.616949 | 4.853376 | 4.909998 | 4.63907  | 5.355044 | 5.333506 | 5.281485 | 6.864516 | 5.923175 | 5.410085 | 8.361937 | 7.09461  | 6.935535 | 5.520241 | 0.58     | 0.249    | 0.000122 | 3.59E-05 | 5.075822 | 5  |
| 9677_at   | YML032C RAD52  | 7.412101  | 7.32216  | 7.62191  | 7.467731 | 7.756909 | 7.072411 | 8.106201 | 7.596165 | 7.432352 | 8.352153 | 7.717526 | 7.207463 | 6.760273 | 7.096617 | 6.082796 | 6.81758  | 0.018    | -0.0688  | 0.511    | 0.051874 | 1.21562  | 13 |
| 9678_at   | YML031C-A      | 5.06019   | 4.5845   | 5.71517  | 4.994872 | 4.759795 | 4.88651  | 4.807018 | 4.630007 | 4.775053 | 4.591143 | 4.810784 | 4.507353 | 4.487236 | 4.489334 | 4.484353 | 4.671467 | -0.164   | 0.0365   | 0.0206   | 0.002943 | 1.552459 | 16 |
| 9679_at   | YML031W NDC1   | 7.415862  | 7.785796 | 8.255651 | 7.410212 | 7.290234 | 7.344294 | 7.168663 | 7.269447 | 6.88929  | 7.047627 | 7.350712 | 7.353937 | 7.70731  | 7.7754   | 7.352529 | 7.151844 | -0.0365  | 0.158    | 0.00434  | 0.000754 | 1.543419 | 13 |
| 9680_at   | YML030W        | 8.890433  | 8.48661  | 7.924244 | 9.177762 | 9.338487 | 8.800843 | 9.848114 | 9.859743 | 9.172745 | 9.59283  | 9.159777 | 9.250526 | 8.231019 | 7.897452 | 6.881306 | 9.45474  | -0.183   | -0.389   | 0.00034  | 8.46E-05 | 3.348547 | 15 |
| 9681_at   | YML029W USA1   | 6.433435  | 6.282268 | 6.668961 | 6.439474 | 6.250875 | 6.431318 | 6.946242 | 6.719334 | 7.178924 | 6.397245 | 7.031219 | 6.672875 | 6.045506 | 5.912154 | 5.888295 | 6.717089 | -0.109   | -0.147   | 0.00599  | 0.000997 | 1.691121 | 12 |
| 9682_at   | YML028W TSA1   | 11.94091  | 11.88914 | 12.07052 | 12.52184 | 12.51463 | 12.47289 | 12.55373 | 12.4556  | 12.6472  | 12.61455 | 12.77235 | 12.94118 | 11.57725 | 11.85869 | 11.65584 | 12.70535 | -0.0493  | -0.241   | 0.00599  | 0.000997 | 1.691121 | 12 |
| 9683_at   | YML027W YOX1   | 6.545207  | 6.981774 | 7.149965 | 7.334541 | 7.393781 | 7.571306 | 6.30447  | 6.022689 | 6.271433 | 5.26972  | 5.474025 | 5.481063 | 5.190829 | 5.756932 | 5.532412 | 6.099076 | -0.484   | 0.0465   | 0.00392  | 0.000691 | 3.60819  | 18 |
| 9684_s_at | YML026C RPS18B | 12.22507  | 12.26962 | 12.49228 | 11.90557 | 12.01304 | 12.15306 | 11.42891 | 11.4764  | 11.35331 | 10.51541 | 11.38031 | 10.90966 | 10.27032 | 10.66973 | 10.44445 | 11.23321 | -0.517   | 0.056    | 0.00392  | 0.000691 | 3.60819  | 18 |
| 9685_at   | YML025C YML6   | 6.610551  | 6.96258  | 6.955207 | 7.446616 | 7.511966 | 7.456503 | 7.893598 | 7.862989 | 7.826995 | 8.185266 | 7.787272 | 8.333231 | 7.569526 | 7.565697 | 7.56591  | 7.993786 | 0.206    | -0.219   | 2.49E-06 | 1.66E-06 | 2.368438 | 9  |
| 9686_s_at | YML024W RPS17A | 11.89489  | 12.02758 | 11.94649 | 11.56819 | 11.66046 | 11.65253 | 11.4007  | 11.46951 | 11.23973 | 10.96756 | 11.14149 | 10.87717 | 10.96748 | 11.10452 | 10.53942 | 11.18485 | -0.301   | 0.0653   | 2.87E-06 | 1.85E-06 | 2.221588 | 16 |
| 9687_at   | YML023C NSE5   | 6.313018  | 6.136228 | 6.139889 | 5.780107 | 5.963904 | 5.804635 | 5.920967 | 5.831233 | 5.601656 | 5.996512 | 5.837871 | 5.642358 | 5.912522 | 6.219433 | 5.468791 | 5.764665 | -0.0727  | 0.0716   | 0.0552   | 0.007085 | 1.336745 | 13 |
| 9688_at   | YML022W APT1   | 8.992588  | 8.800114 | 8.867057 | 8.101864 | 8.158721 | 8.602669 | 7.673824 | 7.629694 | 7.676677 | 6.628544 | 6.841672 | 6.802465 | 6.110817 | 6.472605 | 6.18263  | 7.239328 | -0.733   | 0.0981   | 1.55E-08 | 5.01E-08 | 6.394353 | 18 |
| 9689_at   | YML065W ORC1   | 5.93101   | 5.75635  | 6.401609 | 5.535053 | 5.366393 | 4.992383 | 5.942128 | 5.669512 | 5.217143 | 6.117521 | 5.857752 | 5.723103 | 5.705703 | 5.485659 | 5.400274 | 5.58471  | -0.0623  | 0.0434   | 0.588    | 0.058861 | 1.227688 | 13 |
| 9690_at   | YML064C TEM1   | 5.567068  | 5.920257 | 6.427302 | 5.66686  | 5.755329 | 5.101119 | 5.028416 | 4.798528 | 4.627937 | 3.7573   | 4.241808 | 3.95315  | 3.75663  | 3.954511 | 3.716562 | 4.455687 | -0.619   | 0.128    | 6.56E-06 | 3.44E-06 | 5.15494  | 18 |
| 9691_i_at | YML063W RPS1B  | 10.71433  | 11.07765 | 11.67119 | 10.63807 | 10.71307 | 11.01221 | 9.870532 | 9.967319 | 10.18443 | 8.289717 | 8.021697 | 9.410306 | 8.338668 | 8.231821 | 8.457682 | 9.520601 | -0.812   | 0.0743   | 4.47E-06 | 2.58E-06 | 8.602041 | 18 |
| 9692_at   | YML062C MFT1   | 6.312042  | 6.137989 | 7.145944 | 6.01508  | 6.145725 | 6.694219 | 5.856832 | 5.88955  | 5.27015  | 5.778825 | 5.848657 | 4.990638 | 4.91267  | 5.371424 | 4.643376 | 5.438285 | -0.412   | 0.0877   | 0.000381 | 9.31E-05 | 2.984255 | 16 |
| 9693_at   | YML061C PIF1   | 7.016156  | 6.970493 | 7.353364 | 6.789338 | 6.788694 | 6.817364 | 7.109947 | 6.939049 | 6.800683 | 7.3      | 7.4192   | 6.915803 | 7.176081 | 6.909499 | 6.592457 | 6.975777 | -0.00986 | 8.25E-05 | 0.984    | 0.093631 | 1.026487 | 13 |
| 9694_at   | YML060W OGG1   | 6.110157  | 6.210303 | 6.473715 | 5.841005 | 5.893997 | 5.806592 | 5.969287 | 6.026159 | 5.72514  | 6.099195 | 6.249384 | 5.46708  | 5.062444 | 5.18273  | 4.612553 | 5.831723 | -0.3     | -0.0676  | 0.000518 | 0.00122  | 2.213413 | 16 |
| 9695_at   | YML059C NTE1   | 6.311298  | 6.381969 | 6.289781 | 7.025445 | 6.864113 | 6.41786  | 7.147164 | 6.687987 | 6.999495 | 7.539215 | 7.521472 | 8.217433 | 8.017107 | 8.143437 | 7.881902 | 7.366563 | 0.477    | -0.0573  | 6.52E-06 | 3.43E-06 | 3.537728 | 7  |
| 9696_at   | YML058W SML1   | 10.08859  | 10.14874 | 10.00329 | 11.00458 | 10.7346  | 10.57285 | 10.96581 | 10.99375 | 10.8948  | 11.38178 | 11.39961 | 11.77617 | 10.95743 | 11.22903 | 10.89169 | 11.27846 | 0.275    | -0.201   | 2.87E-06 | 1.85E-06 | 2.53382  | 9  |
| 9697_at   | YML057C-A      | 4.996906  | 4.734354 | 5.4448   | 4.754294 | 4.645453 | 4.871281 | 5.154425 | 5.453919 | 4.926838 | 4.874013 | 4.930839 | 4.674627 | 4.789419 | 4.88218  | 4.595507 | 4.904593 | -0.074   | -0.00318 | 0.382    | 0.039956 | 1.216826 | 13 |
| 9698_at   | YML057W CMP2   | 6.323981  | 6.203794 | 6.51085  | 6.660949 | 6.469293 | 6.320491 | 6.578501 | 6.764212 | 6.550021 | 6.703141 | 6.869212 | 6.805844 | 6.396938 | 6.7953   | 6.198885 | 6.697201 | 0.0489   | -0.0826  | 0.0353   | 0.004758 | 1.321119 | 13 |
| 9699_at   | YML056C IMD4   | 10.56356  | 10.70647 | 10.69217 | 10.17708 | 10.13135 | 10.06299 | 9.48323  | 9.72209  | 9.49182  | 8.774544 | 8.657103 | 8.997678 | 8.211378 | 8.62339  | 8.253507 | 9.213642 | -0.636   | 0.0869   | 1.54E-08 | 5.01E-08 | 6.394353 | 18 |
| 9700_at   | YML056C IMD4   | 10.23246  | 9.739216 | 8.278852 | 7.876508 | 8.02765  | 7.913113 | 6.939784 | 8.979844 | 8.700668 | 7.462806 | 7.299799 | 6.438668 | 5.733497 | 5.344521 | 5.02396  | 6.709987 | -1.04    | -0.0701  | 1.24E-05 | 5.62E-06 | 15.84002 | 20 |
| 9701_at   | YML055W SPC2   | 7.776315  | 7.963211 | 8.029618 | 7.624349 | 7.48877  | 7.379691 | 7.404915 | 7.150159 | 6.753632 | 6.775698 | 6.774577 | 6.779916 | 6.338653 | 6.633807 | 6.159153 | 6.980311 | -0.416   | 0.0487   | 5.77E-08 | 1.18E-07 | 3.00865  | 13 |
| 9702_at   | YML054C CYB2   | 5.795606  | 5.290975 | 3.927333 | 9.513861 | 8.957377 | 7.923757 | 10.62145 | 10.52018 | 10.13033 | 11.28106 | 10.68588 | 10.68478 | 9.241184 | 9.331204 | 7.934683 | 10.89459 | 0.985    | -1.09    | 3.96E-07 | 4.34E-07 | 68.30196 | 2  |
| 9703_at   | YML053C        | 8.718886  | 8.988739 | 9.104803 | 9.119426 | 8.99744  | 8.839359 | 9.195342 | 8.719404 | 8.511531 | 9.565357 | 8.924896 | 9.408325 | 9.340516 | 9.990128 | 9.079993 | 9.213642 | 0.218    | 0.0675   | 0.00382  | 0.000675 | 1.780106 | 8  |
| 9704_at   | YML052W SUR7   | 8.934809  | 8.846982 | 8.8172   | 9.134593 | 8.645036 | 8.714339 | 8.742775 | 8.718367 | 8.65504  | 8.951446 | 8.850173 | 8.778909 | 8.772102 | 9.120919 | 8.706371 | 8.792105 | 0.00714  | 0.0204   | 0.71     | 0.069863 | 1.061027 | 13 |
| 9705_at   | YML051W GAL80  | 7.34497   | 7.356914 | 7.372581 | 8.018052 | 7.646334 | 8.044591 | 8.037543 | 7.63682  | 8.210243 | 8.689259 | 8.465862 | 8.43975  | 7.583016 | 8.263516 | 8.258077 | 8.438318 | 0.236    | -0.208   | 0.00412  | 0.00072  | 4.221084 | 9  |
| 9706_at   | YML050W        | 4.615869  | 4.476829 | 4.29016  | 4.908611 | 4.898133 | 5.023854 | 5.237861 | 4.891563 | 5.143167 | 5.174365 | 4.995053 | 4.991269 | 4.706911 | 4.984687 | 4.569202 | 5.113789 | 0.0599   | -0.142   | 0.000115 | 3.42E-05 | 1.55288  | 12 |
| 9707_at   | YML049C RSE1   | 6.024479  | 5.903762 | 5.593649 | 5.781655 | 5.679143 | 5.735596 | 6.264958 | 6.827802 | 5.922301 | 6.511824 | 6.421909 | 6.402952 | 6.755679 | 6.959895 | 6.522461 | 6.159895 | 0.272    | 0.0307   | 0.000117 | 3.47E-05 | 2.054455 | 7  |
| 9708_at   | YML048W GSF2   | 7.90188   | 7.563361 | 6.348131 | 7.395275 | 7.450313 | 7.502501 | 7.724516 | 7.823928 | 7.992122 | 8.046206 | 8.12054  | 8.24787  | 9.31987  | 8.557511 | 8.707313 | 7.961434 | 0.424    | 0.0258   | 0.000528 | 0.00124  | 3.076151 | 7  |
| 9710_at   | YML047C PRM6   | 3.85231   | 3.792038 | 3.64975  | 3.667238 | 3.815145 | 3.895146 | 3.877328 | 4.009331 | 4.027504 | 3.853228 | 3.849194 | 3.604488 | 4.163899 | 4.114339 | 3.959638 | 3.858393 | 0.0664   | 0.0176   | 0.0736   | 0.009162 | 1.192409 | 13 |
| 9711_at   | YML088W UFO1   | 6.094329  | 6.134571 | 5.774428 | 6.10673  | 6.091627 | 6.088104 | 6.240283 | 6.938969 | 5.755471 | 6.638347 | 6.408733 | 6.67887  | 6.175673 | 6.837912 | 7.521503 | 6.301536 | 0.487    | 0.17     | 5.93E-08 | 1.19E-07 | 3.631671 | 8  |
| 9712_at   | YML087C        | 5.496919  | 5.426968 | 5.748061 | 6.711638 | 6.607221 | 6.014961 | 6.653087 | 6.578716 | 6.530044 | 6.529896 | 6.337821 | 7.187368 | 7.235882 | 7.08602  | 6.970699 | 6.746681 | 0.368    | -0.111   | 9.65E-05 | 2.97E-05 | 2.655897 | 16 |
| 9713_at   | YML086C ALO1   | 7.168576  | 7.215402 | 7.183474 | 7.150192 | 6.963653 | 7.124597 | 6.960075 | 7.089505 | 7.019192 | 6.620334 | 6.688531 | 6.707066 | 6.853866 | 7.086827 | 6.571409 | 6.872729 | -0.129   | 0.0514   | 0.00162  | 0.000321 | 1.407777 | 17 |
| 9714_at   | YML085C TUB1   | 7.157193  | 6.982014 | 9.26306  | 9.316616 | 9.153653 | 9.357749 | 9.076684 | 9.001601 | 8.894867 | 9.144036 | 9.110614 | 9.436774 | 6.969227 | 9.844487 | 9.493376 | 9.113591 | 0.0356   | 0.14     | 0.00155  | 0.00031  | 1.465329 | 13 |
| 9715_at   | YML084W        | 3.654143  | 3.758278 | 3.267797 | 3.315383 | 3.13604  | 3.272989 | 3.340972 | 3.402399 | 3.816036 | 3.407698 | 3.56569  | 3.599542 | 4.08388  | 4.104441 | 4.162522 | 3.491281 | 0.146    | 0.0926   | 0.00173  | 0.00034  | 1.593924 | 13 |
| 9716_at   | YML083C        | 6.97472   | 6.983949 | 7.535096 |          |          |          |          |          |          |          |          |          |          |          |          |          |          |          |          |          |          |    |

|           |           |       |          |          |          |          |          |          |          |          |          |          |           |          |          |          |          |          |         |          |          |          |          |    |
|-----------|-----------|-------|----------|----------|----------|----------|----------|----------|----------|----------|----------|----------|-----------|----------|----------|----------|----------|----------|---------|----------|----------|----------|----------|----|
| 9747_at   | YML097C   | VPS9  | 4.381393 | 4.254784 | 5.198197 | 4.184101 | 4.258116 | 3.729923 | 4.319449 | 3.967129 | 3.492466 | 4.337706 | 3.93078   | 3.590324 | 3.650883 | 3.836332 | 3.179601 | 3.871488 | -0.247  | 0.055    | 0.02     | 0.002864 | 1.92417  | 16 |
| 9748_at   | YML096W   |       | 5.968455 | 6.057066 | 6.489457 | 5.425736 | 5.266661 | 5.178034 | 5.490231 | 5.312385 | 5.00137  | 5.121412 | 5.513514  | 4.40994  | 4.046734 | 4.422458 | 3.879681 | 5.058315 | -0.51   | 0.0206   | 2.83E-05 | 1.09E-05 | 3.861585 | 18 |
| 9749_at   | YML095C   | RAD10 | 4.866171 | 4.612539 | 5.244828 | 4.650089 | 5.02043  | 4.792131 | 4.871721 | 4.842381 | 4.979431 | 4.727612 | 4.304601  | 4.432612 | 3.792808 | 3.747396 | 3.475316 | 4.684862 | -0.296  | -0.125   | 1.97E-05 | 8.09E-06 | 2.282484 | 15 |
| 9750_at   | YML094C-A |       | 3.829169 | 3.596278 | 4.477243 | 3.273459 | 3.210685 | 3.151535 | 3.842324 | 3.22563  | 3.234096 | 3.370222 | 3.071877  | 3.321015 | 3.133547 | 3.273954 | 3.074687 | 3.192159 | -0.185  | 0.0965   | 0.0102   | 0.001586 | 1.701146 | 14 |
| 9751_at   | YML094W   | GIM5  | 7.783927 | 7.841777 | 8.13951  | 7.750793 | 7.671778 | 7.384207 | 7.283249 | 7.193606 | 7.019359 | 6.587536 | 6.924823  | 6.592251 | 5.285337 | 5.767679 | 5.558393 | 6.945988 | -0.628  | -0.0568  | 8E-09    | 3.26E-08 | 5.285954 | 18 |
| 9752_at   | YML093W   | UTP14 | 6.927106 | 7.007762 | 7.13261  | 6.014147 | 6.651176 | 6.811962 | 6.265657 | 6.400222 | 5.558607 | 6.463219 | 5.356151  | 4.982251 | 5.28885  | 5.318436 | 4.591042 | 5.67982  | -0.499  | 0.0955   | 0.000482 | 0.000115 | 3.749613 | 18 |
| 9753_at   | YML092C   | PRE8  | 9.829463 | 9.653552 | 9.665048 | 9.845306 | 9.871261 | 9.841929 | 9.914633 | 9.892786 | 9.838654 | 9.782203 | 10.08666  | 10.38702 | 9.914772 | 10.00469 | 9.572946 | 9.987186 | 0.0451  | -0.06    | 0.0942   | 0.011425 | 1.243162 | 13 |
| 9754_at   | YML091C   | RP2   | 5.226892 | 5.49942  | 6.062915 | 5.926689 | 5.846737 | 5.334026 | 5.758884 | 5.763619 | 5.696198 | 5.811848 | 5.613005  | 6.011347 | 7.196065 | 6.550378 | 6.72753  | 5.802577 | 0.298   | 0.114    | 0.000236 | 6.23E-05 | 2.241748 | 8  |
| 9755_at   | YML090W   |       | 3.493386 | 3.288921 | 4.244663 | 3.37127  | 3.450382 | 3.499388 | 3.291432 | 3.416479 | 3.448321 | 3.3576   | 3.483808  | 3.401223 | 3.713312 | 3.80532  | 3.573052 | 3.378954 | 0.00821 | 0.0839   | 0.0952   | 0.011536 | 1.235566 | 13 |
| 9756_at   | YML089C   |       | 5.042526 | 4.852667 | 5.422634 | 5.226799 | 4.998304 | 4.63288  | 5.600204 | 5.052578 | 5.140284 | 6.2246   | 6.650409  | 5.11077  | 8.045183 | 7.532656 | 7.519416 | 5.4195   | 0.671   | 0.268    | 3.99E-07 | 4.36E-07 | 6.28936  | 5  |
| 9757_at   | YML128C   | MSC1  | 7.261482 | 7.185154 | 7.25116  | 9.323732 | 9.088494 | 8.717344 | 10.28555 | 9.735302 | 10.17869 | 9.261401 | 9.099264  | 9.392337 | 8.468936 | 8.400017 | 8.075703 | 9.770629 | 0.215   | -0.544   | 0.000033 | 1.23E-05 | 5.26144  | 11 |
| 9758_at   | YML127W   | RSC9  | 8.488867 | 8.312481 | 8.106027 | 8.261921 | 8.193711 | 8.024267 | 8.31343  | 8.054325 | 7.923925 | 8.241246 | 8.301542  | 8.081559 | 8.469609 | 8.451886 | 7.859812 | 8.139852 | -0.0015 | 0.038    | 0.52     | 0.052621 | 1.098822 | 13 |
| 9759_at   | YML126C   | ERG13 | 10.09242 | 9.952062 | 9.29063  | 10.94267 | 10.86886 | 10.28243 | 10.96443 | 10.9339  | 11.06481 | 11.34957 | 11.31051  | 11.64584 | 9.371233 | 9.510467 | 9.493552 | 11.24609 | -0.033  | -0.451   | 5.04E-06 | 2.83E-06 | 3.082279 | 11 |
| 9760_at   | YML125C   | PGA3  | 8.726643 | 8.833727 | 9.513239 | 8.897234 | 8.871326 | 8.757253 | 8.734571 | 8.515471 | 8.619862 | 8.208749 | 8.549132  | 8.491292 | 5.76042  | 8.156988 | 7.460575 | 8.520711 | -0.336  | -0.0389  | 7.93E-05 | 2.52E-05 | 1.437026 | 16 |
| 9761_at   | YML124C   | TUB3  | 9.630802 | 9.743497 | 9.855397 | 9.266842 | 9.276911 | 9.241991 | 8.979537 | 9.212892 | 8.955    | 9.3332   | 9.370766  | 9.738286 | 9.959022 | 10.07755 | 9.773572 | 9.223002 | 0.0799  | 0.167    | 0.000311 | 7.83E-05 | 2.683533 | 13 |
| 9762_at   | YML123C   | PHO84 | 5.954035 | 5.698406 | 6.061481 | 5.449469 | 5.770275 | 5.97175  | 6.178122 | 6.140717 | 5.886609 | 5.255586 | 5.169711  | 5.115936 | 4.995819 | 5.357781 | 4.853193 | 5.537012 | -0.252  | -0.0124  | 0.0034   | 0.000609 | 1.952851 | 16 |
| 9763_at   | YML122C   |       | 6.320033 | 6.733469 | 4.480075 | 6.359287 | 6.720301 | 3.721718 | 3.864512 | 3.73523  | 3.658785 | 3.971767 | 3.637746  | 3.686272 | 3.584613 | 4.017721 | 4.504126 | 3.732386 | -0.058  | 0.0296   | 0.385    | 0.04017  | 1.17932  | 13 |
| 9764_at   | YML121W   | GDI1  | 7.849396 | 7.642533 | 7.520157 | 7.391565 | 7.704445 | 6.952562 | 7.531388 | 7.545135 | 7.40818  | 7.544861 | 7.437747  | 7.272898 | 7.624884 | 6.666197 | 6.547162 | 7.375769 | -0.236  | -0.0643  | 0.000363 | 8.94E-05 | 1.870357 | 16 |
| 9765_at   | YML120C   | NTR1  | 6.884922 | 6.40666  | 5.726668 | 7.695381 | 7.634633 | 6.175771 | 6.228745 | 6.292102 | 7.919791 | 8.411753 | 8.115131  | 8.116398 | 8.705541 | 7.853168 | 7.57568  | 8.191791 | 0.37    | -0.319   | 0.000026 | 3.65E-05 | 3.92114  | 10 |
| 9766_at   | YML119W   |       | 6.18581  | 6.223138 | 6.707547 | 6.152766 | 6.126368 | 5.68798  | 5.843775 | 5.514623 | 5.301691 | 5.400235 | 5.173604  | 5.414805 | 5.275678 | 5.378058 | 5.078391 | 5.460426 | -0.307  | 0.0986   | 8.03E-05 | 2.55E-05 | 2.266015 | 16 |
| 9767_at   | YML118W   | NGL3  | 4.267829 | 4.213655 | 4.968773 | 4.589173 | 4.687899 | 4.438511 | 4.702256 | 4.998457 | 4.790753 | 5.001538 | 5.19165   | 4.938432 | 5.475493 | 5.368447 | 5.187832 | 4.908686 | 0.237   | -0.00131 | 0.000564 | 0.00013  | 1.575117 | 9  |
| 9768_at   | YML117W   | NAB6  | 5.403057 | 5.631145 | 5.81177  | 5.766461 | 5.33592  | 5.583558 | 6.059624 | 6.037604 | 6.024006 | 6.516079 | 6.984945  | 7.204954 | 7.543395 | 7.446387 | 7.718539 | 6.374425 | 0.57    | 0.0508   | 2.62E-06 | 1.73E-06 | 4.530656 | 7  |
| 9769_g_at | YML117W   | NAB6  | 6.945329 | 7.095836 | 7.403511 | 7.316857 | 7.078116 | 7.40622  | 7.535721 | 7.418446 | 7.432269 | 8.17831  | 8.509681  | 8.504039 | 9.493623 | 9.786513 | 9.611691 | 7.909434 | 0.678   | 0.125    | 3.45E-09 | 2.00E-08 | 6.035971 | 6  |
| 9770_at   | YML116W-A |       | 7.341213 | 7.514573 | 8.122668 | 8.032707 | 7.648774 | 7.808907 | 7.792366 | 7.927879 | 7.809818 | 8.41535  | 8.790621  | 8.16035  | 8.918028 | 10.42466 | 10.14265 | 8.340091 | 0.67    | 0.15     | 2.3E-07  | 2.94E-07 | 5.907852 | 6  |
| 9771_at   | YML116W   | ATR1  | 7.34994  | 7.288208 | 7.341892 | 7.317352 | 7.208706 | 7.117913 | 7.625201 | 7.132707 | 7.111948 | 7.69815  | 7.249201  | 7.188168 | 7.385257 | 7.47874  | 7.12903  | 7.302704 | 0.0152  | 0.00507  | 0.908    | 0.087084 | 1.041137 | 13 |
| 9772_at   | YML115C   | VAN1  | 6.16152  | 6.343576 | 4.985488 | 5.683715 | 5.860374 | 5.86209  | 6.198987 | 6.129719 | 5.884611 | 6.399697 | 5.981448  | 5.931816 | 6.093861 | 6.063416 | 6.002368 | 6.043493 | 0.112   | -0.0076  | 0.34     | 0.035927 | 1.345809 | 13 |
| 9773_at   | YML114C   | TAF8  | 5.698542 | 6.043542 | 6.012586 | 6.005406 | 5.742906 | 6.305494 | 5.770441 | 5.703035 | 5.721055 | 5.778248 | 5.941653  | 6.069287 | 5.298264 | 5.944822 | 6.569865 | 5.876691 | -0.0678 | -0.0261  | 0.274    | 0.029592 | 1.201878 | 13 |
| 9774_at   | YML113W   | DAT1  | 7.206928 | 6.820003 | 7.256357 | 7.281196 | 7.448091 | 7.360879 | 7.345874 | 7.248971 | 7.168089 | 7.996244 | 7.728971  | 7.28206  | 7.12023  | 7.435471 | 7.27671  | 7.497321 | 0.0704  | -0.0863  | 0.0704   | 0.008819 | 1.317985 | 13 |
| 9775_at   | YML112W   | CTK3  | 5.604393 | 5.679209 | 5.699875 | 5.561633 | 5.636362 | 5.644536 | 5.763614 | 5.829455 | 5.841413 | 6.733582 | 6.385053  | 6.263267 | 6.919367 | 7.460546 | 6.623824 | 6.090799 | 0.404   | 0.0702   | 2.73E-06 | 1.77E-06 | 2.917936 | 7  |
| 9776_at   | YML111W   | BUL2  | 5.392157 | 5.276372 | 4.758537 | 5.83668  | 5.802729 | 5.610313 | 5.56228  | 5.72221  | 5.771249 | 5.307844 | 5.462424  | 5.631163 | 5.079746 | 5.501952 | 5.226409 | 5.654784 | 0.00257 | -0.119   | 0.0224   | 0.003162 | 1.339114 | 12 |
| 9777_at   | YML110C   | COO5  | 5.909273 | 9.837553 | 9.041408 | 10.53984 | 10.42673 | 10.29870 | 10.89551 | 10.51851 | 10.62003 | 10.09675 | 10.12044  | 10.56157 | 9.172438 | 9.572704 | 9.75032  | 10.56724 | -0.028  | -0.295   | 0.000216 | 5.79E-05 | 2.098684 | 12 |
| 9778_at   | YML109W   | ZDS2  | 5.508844 | 5.521285 | 5.724579 | 5.518771 | 5.412872 | 5.897714 | 5.23014  | 5.113804 | 5.260842 | 5.341084 | 5.509138  | 5.462767 | 6.181256 | 6.725473 | 6.093961 | 5.398457 | 0.175   | 0.159    | 0.000344 | 8.53E-05 | 1.948561 | 8  |
| 9800_s_at | YML133C   |       | 6.483461 | 5.285001 | 5.62875  | 6.363577 | 6.458241 | 6.631426 | 6.845534 | 6.866181 | 7.228773 | 6.826531 | 6.999875  | 7.040558 | 8.463859 | 7.848484 | 8.159169 | 7.014382 | 0.575   | -0.00771 | 2.27E-05 | 9.09E-06 | 4.932814 | 10 |
| 9801_at   | YML131W   |       | 6.562513 | 6.794505 | 7.359382 | 7.958646 | 7.800381 | 7.939268 | 8.26062  | 7.955949 | 8.514041 | 8.473385 | 8.011238  | 8.906589 | 8.282249 | 8.441234 | 9.737787 | 8.049089 | 0.18    | -0.326   | 8.89E-05 | 2.79E-05 | 5.290024 | 7  |
| 9802_at   | YML130C   | ERO1  | 6.172563 | 6.147486 | 6.620943 | 6.656553 | 6.633794 | 6.742021 | 6.947589 | 6.890748 | 6.653191 | 7.773106 | 7.553485  | 8.084884 | 7.801708 | 8.088654 | 8.184543 | 7.318013 | 0.497   | -0.0458  | 3.98E-06 | 2.35E-06 | 3.730898 | 7  |
| 9803_at   | YML129C   | COX14 | 7.565515 | 8.018118 | 8.739421 | 9.298651 | 9.083636 | 9.262992 | 9.820826 | 9.132788 | 9.135047 | 9.210229 | 9.223839  | 9.951995 | 8.878027 | 8.959188 | 9.369891 | 9.424395 | 0.24    | -0.223   | 0.0012   | 0.000248 | 2.52353  | 9  |
| 9850_at   | YLR446W   |       | 5.347252 | 4.997455 | 5.317095 | 5.938545 | 5.390115 | 5.506225 | 6.044546 | 6.044445 | 5.260844 | 5.405197 | 5.587829  | 6.534033 | 5.105822 | 5.369422 | 5.137715 | 5.802488 | 0.0076  | -0.163   | 0.0382   | 0.005099 | 1.500824 | 12 |
| 9851_at   | YLR447C   | VMA6  | 9.689129 | 9.353486 | 9.865967 | 9.070528 | 8.972829 | 8.961968 | 8.954172 | 8.89757  | 9.28052  | 8.511365 | 8.740429  | 9.199736 | 8.532208 | 8.192279 | 8.64658  | 8.87659  | -0.221  | 0.00366  | 0.00279  | 0.000513 | 1.791113 | 16 |
| 9852_at   | YLR448W   | RP16B | 11.98535 | 11.73873 | 11.24177 | 10.94448 | 11.09309 | 11.0057  | 10.54598 | 10.65013 | 10.50611 | 9.74184  | 10.104735 | 9.658281 | 9.755619 | 9.178321 | 9.240827 | 10.18383 | -0.623  | 0.0961   | 1.25E-07 | 1.98E-07 | 5.216698 | 18 |
| 9853_at   | YLR449W   | FPR4  | 7.805386 | 8.013079 | 7.918243 | 6.893125 | 6.856109 | 6.839247 | 6.843787 | 6.951498 | 6.189997 | 6.947718 | 6.465572  | 6.569462 | 6.600569 | 6.738705 | 6.311729 | 6.539568 | -0.314  | 0.187    | 6.66E-05 | 2.19E-05 | 2.609084 | 14 |
| 9854_at   | YLR450W   | HMG2  | 9.743436 | 10.05067 | 9.893728 | 9.708679 | 9.491482 | 9.94436  | 9.699252 | 9.728713 | 9.508917 | 9.354993 | 9.738713  | 9.5      |          |          |          |          |         |          |          |          |          |    |

|           |         |        |          |          |          |          |          |          |          |          |          |          |          |          |           |          |          |          |           |          |          |          |          |    |
|-----------|---------|--------|----------|----------|----------|----------|----------|----------|----------|----------|----------|----------|----------|----------|-----------|----------|----------|----------|-----------|----------|----------|----------|----------|----|
| 9888_at   | YLR440C | SEC39  | 6.148129 | 6.104086 | 6.602788 | 6.118161 | 6.144053 | 6.146621 | 6.187415 | 6.044592 | 5.546962 | 5.892719 | 5.866968 | 5.83578  | 5.125148  | 5.661364 | 5.397102 | 5.899536 | -0.227    | -0.0159  | 0.000748 | 0.000165 | 1.823482 | 16 |
| 9889_i_at | YLR441C | RPS1A  | 12.28356 | 12.22831 | 11.97101 | 11.45302 | 11.62494 | 11.16008 | 11.07565 | 10.84371 | 10.811   | 10.09327 | 9.718661 | 9.285315 | 8.620778  | 8.363908 | 8.475399 | 10.29043 | -0.998    | 0.0145   | 1.003-09 | 1.05E-08 | 14.09584 | 20 |
| 9890_s_at | YLR441C | RPS1A  | 10.34295 | 10.60938 | 11.24921 | 10.24524 | 10.33241 | 10.53403 | 9.849449 | 9.529843 | 10.05324 | 9.126612 | 9.089611 | 9.152152 | 7.453992  | 7.163971 | 8.009631 | 9.427716 | -0.846    | -0.0932  | 3.77E-08 | 9.00E-08 | 9.413687 | 18 |
| 9891_at   | YLR442C | SIR3   | 5.440864 | 5.141923 | 5.891759 | 4.935142 | 4.915635 | 4.445473 | 4.576644 | 4.5973   | 4.327688 | 4.117241 | 4.174001 | 4.146364 | 4.020332  | 4.253162 | 3.98368  | 4.970237 | -0.369    | 0.143    | 3.15E-06 | 2.00E-06 | 2.662068 | 14 |
| 9892_at   | YLR443W | ECM7   | 6.684369 | 6.602823 | 7.211539 | 5.939238 | 6.006493 | 5.404806 | 6.185558 | 5.864983 | 5.662152 | 5.842397 | 5.407369 | 5.882824 | 4.66375   | 4.605656 | 5.952175 | 5.700197 | -0.117    | 0.228    | 0.000857 | 0.000186 | 2.096919 | 14 |
| 9893_at   | YLR444C |        | 4.854401 | 4.956897 | 5.330507 | 4.394653 | 4.663897 | 4.258659 | 4.887775 | 4.662825 | 4.522813 | 4.570526 | 4.447112 | 4.359553 | 5.12627   | 4.734053 | 4.821605 | 4.491835 | -0.0262   | 0.127    | 0.013    | 0.001958 | 1.417905 | 13 |
| 9894_at   | YLR445W |        | 3.178768 | 2.959261 | 3.689692 | 3.067143 | 2.993746 | 2.791535 | 2.962327 | 2.900937 | 2.77979  | 2.787403 | 2.792995 | 2.929355 | 3.086516  | 3.340128 | 3.032713 | 2.830393 | -0.0321   | 0.105    | 0.0138   | 0.002062 | 1.357708 | 13 |
| 9895_i_at | YLR406C | RPL31B | 11.65245 | 11.74225 | 12.20149 | 11.64866 | 11.52282 | 11.21801 | 10.45672 | 10.62782 | 10.38926 | 9.560521 | 9.686212 | 9.882822 | 8.93072   | 9.248199 | 9.168928 | 10.20645 | -0.773    | 0.0887   | 3.96E-07 | 4.34E-07 | 7.762671 | 18 |
| 9896_f_at | YLR406C | RPL31B | 10.95743 | 11.13879 | 11.83077 | 10.80201 | 10.76219 | 11.00954 | 9.439173 | 9.728615 | 9.480405 | 8.541787 | 8.59266  | 9.250021 | 7.510131  | 8.658237 | 8.567281 | 9.322681 | -0.864    | 0.138    | 1.23E-05 | 5.61E-06 | 9.883389 | 20 |
| 9897_f_at | YLR406C | RPL31B | 11.19287 | 11.58299 | 12.11452 | 11.06977 | 11.18806 | 11.4734  | 10.03918 | 10.25709 | 10.24959 | 9.494493 | 9.259239 | 9.877217 | 7.85731   | 8.027915 | 8.73233  | 9.956648 | -0.926    | -0.00398 | 4.73E-07 | 4.92E-07 | 1.163394 | 20 |
| 9898_at   | YLR407W |        | 7.886324 | 7.57301  | 7.979436 | 7.558584 | 7.851783 | 7.349425 | 7.090584 | 7.494988 | 7.535023 | 8.569544 | 7.659833 | 7.323225 | 9.101279  | 8.30576  | 8.784733 | 7.714825 | 0.243     | 0.152    | 0.00227  | 0.00043  | 2.166414 | 8  |
| 9899_at   | YLR408C |        | 6.102976 | 6.183516 | 7.045068 | 6.715328 | 6.453786 | 6.553483 | 6.219386 | 6.155245 | 6.06959  | 6.2175   | 6.162062 | 6.21168  | 5.779925  | 5.989338 | 5.389543 | 6.245933 | -0.194    | -0.0415  | 0.013    | 0.001953 | 1.674187 | 16 |
| 9900_at   | YLR409C | UTP21  | 7.392155 | 7.747784 | 7.709863 | 6.861535 | 7.167057 | 6.389318 | 6.425968 | 6.42692  | 5.763108 | 5.938747 | 5.37719  | 4.94661  | 5.317629  | 5.580834 | 4.931187 | 5.812029 | -0.648    | 0.18     | 5.25E-06 | 0.002165 | 5.572199 | 18 |
| 9901_at   | YLR410W | VIP1   | 6.896733 | 7.106732 | 6.999595 | 7.006063 | 6.899336 | 6.625669 | 7.028347 | 6.917454 | 6.942427 | 6.50489  | 6.853615 | 6.990069 | 7.235008  | 6.904375 | 7.156372 | 6.843413 | 0.0165    | 0.0563   | 0.144    | 0.016711 | 1.171039 | 13 |
| 9902_at   | YLR411W | CTR3   | 5.457269 | 5.023228 | 5.651911 | 6.571703 | 6.170317 | 5.799833 | 7.451898 | 7.088923 | 7.062802 | 7.579401 | 7.305488 | 7.821951 | 6.646982  | 6.574191 | 5.549906 | 7.306116 | 0.289     | -0.419   | 0.00023  | 6.10E-05 | 4.385759 | 10 |
| 9903_at   | YLR412W |        | 6.837203 | 7.199889 | 7.814854 | 6.887225 | 6.839847 | 6.852762 | 6.643236 | 6.472594 | 6.72954  | 5.504658 | 6.270076 | 6.578662 | 5.541488  | 5.752318 | 6.115712 | 6.353498 | -0.404    | 0.0545   | 0.000237 | 6.24E-05 | 2.9148   | 16 |
| 9904_at   | YLR413W |        | 7.670284 | 7.705916 | 8.080191 | 8.050331 | 7.666623 | 7.625023 | 7.819115 | 7.476927 | 8.804822 | 7.318001 | 7.863698 | 8.73013  | 10.154139 | 9.479310 | 10.18646 | 7.871473 | 0.523     | 0.28     | 8.69E-06 | 4.26E-06 | 4.810571 | 8  |
| 9905_at   | YLR414C |        | 9.642047 | 9.316778 | 9.395279 | 9.000247 | 9.176788 | 8.846444 | 8.590246 | 9.170209 | 8.680248 | 9.20785  | 9.212549 | 9.284346 | 8.870173  | 9.592394 | 9.459638 | 8.977774 | -0.000606 | 0.107    | 0.104    | 0.012512 | 1.296249 | 13 |
| 9906_at   | YLR415C |        | 4.662335 | 4.456721 | 5.108474 | 4.347233 | 4.294681 | 4.027511 | 4.543583 | 4.574736 | 4.245296 | 4.585271 | 4.25686  | 4.113817 | 4.411433  | 4.767355 | 4.463061 | 4.255314 | -0.0365   | 0.0947   | 0.0811   | 0.009982 | 1.333553 | 13 |
| 9907_at   | YLR416C |        | 4.056934 | 3.946559 | 4.465661 | 3.890869 | 4.074166 | 3.922532 | 3.963051 | 3.847663 | 3.943804 | 3.865241 | 3.902935 | 3.524011 | 4.120536  | 3.920559 | 3.869671 | 3.829187 | -0.0572   | 0.0652   | 0.041    | 0.005429 | 1.283585 | 13 |
| 9908_at   | YLR417W | VPS36  | 5.809095 | 5.669427 | 6.035151 | 5.517895 | 5.552223 | 5.195854 | 5.65984  | 5.603243 | 5.456345 | 5.907853 | 5.806479 | 5.146587 | 9.041923  | 7.474928 | 5.607808 | 4.939    | 0.298     | 6.62E-07 | 6.27E-07 | 4.239883 | 8        |    |
| 9909_at   | YLR418C | CDC73  | 8.761416 | 8.621536 | 8.206584 | 8.028344 | 8.176611 | 7.479026 | 7.683145 | 7.686629 | 7.521368 | 7.156044 | 6.953262 | 6.339846 | 5.961906  | 6.016897 | 5.704748 | 7.181769 | -0.704    | 0.0102   | 9.83E-08 | 1.70E-07 | 6.458517 | 18 |
| 9910_at   | YLR419W |        | 6.954504 | 6.922479 | 6.437165 | 6.421469 | 6.81765  | 6.260363 | 6.526238 | 6.564078 | 6.223154 | 6.017523 | 6.193832 | 5.56621  | 9.087403  | 7.521454 | 8.271865 | 6.193895 | 0.32      | 0.374    | 0.000281 | 7.20E-05 | 4.107005 | 8  |
| 9911_at   | YLR420W | URA4   | 10.26196 | 10.09569 | 9.841648 | 9.344448 | 9.384959 | 9.10642  | 9.093964 | 8.67239  | 8.705317 | 8.178196 | 7.865722 | 7.667741 | 7.716422  | 7.697067 | 7.557187 | 8.346177 | -0.668    | 0.146    | 2.6E-08  | 6.96E-08 | 5.883102 | 18 |
| 9912_at   | YLR421C | RPN13  | 9.909095 | 9.793678 | 9.701118 | 9.530477 | 9.525555 | 9.284399 | 10.10017 | 9.749677 | 9.54633  | 10.13801 | 9.778515 | 9.318888 | 8.966345  | 9.037922 | 8.755503 | 9.651377 | -0.195    | -0.0837  | 0.00785  | 0.00126  | 1.725781 | 17 |
| 9913_at   | YLR422W |        | 6.361919 | 6.147792 | 5.521024 | 6.354486 | 6.200772 | 6.414268 | 6.57456  | 6.535277 | 6.599188 | 6.659027 | 6.596402 | 7.058664 | 8.004506  | 7.259529 | 7.50098  | 6.702414 | 0.426     | 0.0124   | 7.1E-06  | 3.66E-06 | 3.092507 | 15 |
| 9914_at   | YLR423C | ATG17  | 4.31794  | 4.319439 | 3.4541   | 4.661059 | 4.515382 | 4.321564 | 4.939154 | 4.819832 | 4.794508 | 4.817536 | 4.622163 | 4.386879 | 3.877673  | 4.231577 | 3.945655 | 4.735716 | -0.0123   | -0.195   | 0.00296  | 0.000537 | 1.625131 | 12 |
| 9915_at   | YLR424W | SP382  | 4.414185 | 4.417068 | 3.787808 | 4.237177 | 4.175306 | 4.291209 | 4.450969 | 4.627944 | 4.338811 | 4.646132 | 4.373681 | 4.059637 | 4.418077  | 4.287782 | 3.716341 | 4.388645 | -0.0111   | -0.0611  | 0.366    | 0.03891  | 1.172665 | 13 |
| 9916_at   | YLR425W | TUS1   | 5.884344 | 5.586957 | 5.484858 | 5.56473  | 5.591076 | 5.940646 | 5.693488 | 5.75659  | 5.801346 | 5.537657 | 5.813655 | 6.53959  | 8.835686  | 6.283633 | 5.768901 | 5.747896 | 0.0856    | 0.00531  | 0.0075   | 0.009571 | 1.254586 | 13 |
| 9917_at   | YLR426W |        | 8.067717 | 8.367302 | 8.225492 | 8.067528 | 7.829762 | 8.175189 | 8.127702 | 8.071337 | 8.278404 | 7.994958 | 8.099201 | 7.968042 | 7.796376  | 7.80491  | 7.997145 | 8.011988 | -0.132    | 0.0345   | 0.00502  | 0.000857 | 1.420777 | 16 |
| 9918_at   | YLR383W | SMC6   | 6.095093 | 6.241638 | 6.49714  | 6.082999 | 6.139562 | 6.100581 | 6.163973 | 6.117199 | 5.697308 | 6.698807 | 6.505836 | 6.69755  | 6.719339  | 6.961472 | 6.38057  | 6.268437 | 0.151     | 0.0499   | 0.0262   | 0.003635 | 1.491343 | 13 |
| 9919_at   | YLR384C | IMK3   | 6.993178 | 6.921246 | 6.726115 | 6.337129 | 6.470247 | 6.413694 | 6.732872 | 6.738534 | 6.45108  | 6.682387 | 6.675629 | 6.176005 | 6.942707  | 6.859054 | 6.770124 | 6.586503 | 0.025     | 0.0719   | 0.051    | 0.006620 | 1.231286 | 13 |
| 9920_at   | YLR385C | SWC7   | 3.37174  | 3.040188 | 3.948344 | 3.257086 | 3.394029 | 3.109003 | 3.27733  | 3.280594 | 2.948528 | 2.87763  | 3.149917 | 3.037574 | 3.062670  | 3.292862 | 2.950468 | 3.085921 | -0.0984   | 0.0534   | 0.088    | 0.010744 | 1.33294  | 13 |
| 9921_at   | YLR386W | VAC14  | 5.825509 | 6.23196  | 6.07827  | 5.75171  | 6.360354 | 5.866605 | 6.599758 | 5.99663  | 5.917866 | 6.204158 | 6.03828  | 6.037427 | 5.777843  | 5.983842 | 5.671542 | 6.121861 | -0.0508   | -0.0498  | 0.338    | 0.035779 | 1.224197 | 13 |
| 9922_at   | YLR387C | REH1   | 8.13104  | 8.125324 | 8.029089 | 7.785067 | 7.840845 | 7.636375 | 8.040816 | 7.958927 | 7.848362 | 8.799631 | 8.688343 | 8.270015 | 8.811443  | 9.016812 | 8.592582 | 8.171605 | 0.243     | 0.0691   | 0.00127  | 0.00026  | 1.904672 | 8  |
| 9923_f_at | YLR388W | RPS29A | 12.11981 | 12.21871 | 12.40184 | 11.88837 | 11.80349 | 12.07527 | 11.13561 | 11.14264 | 11.07625 | 10.2769  | 10.67129 | 10.90789 | 10.33003  | 10.84476 | 10.55247 | 10.96109 | -0.483    | 0.133    | 0.000015 | 6.48E-06 | 3.600612 | 18 |
| 9924_at   | YLR389C | STE23  | 7.067312 | 6.961086 | 7.265429 | 6.670335 | 6.624413 | 6.54224  | 6.937228 | 6.777701 | 7.0766   | 6.716335 | 6.688883 | 7.103192 | 6.068798  | 6.742324 | 6.429598 | 6.759673 | -0.143    | -0.00671 | 0.0422   | 0.005578 | 1.468002 | 16 |
| 9925_at   | YLR390W | ECM19  | 7.78191  | 7.782486 | 8.272012 | 8.522335 | 8.42635  | 9.043937 | 8.665444 | 8.343421 | 8.362781 | 8.589869 | 8.227059 | 8.731967 | 8.15307   | 8.780598 | 8.192749 | 8.671499 | 0.0836    | -0.12    | 0.0545   | 0.007011 | 1.527771 | 13 |
| 9926_at   | YLR390W | CCW14  | 11.0869  | 10.89329 | 10.42046 | 11.09071 | 11.06449 | 10.80748 | 11.48037 | 11.2912  | 11.41555 | 11.79139 | 11.37131 | 11.86968 | 10.95875  | 11.42117 | 11.02895 | 11.49556 | 0.135     | -0.152   | 0.00582  | 0.000972 | 1.974667 | 19 |
| 9927_at   | YLR392C |        | 4.450601 | 4.416328 | 3.730034 | 4.489211 | 4.296806 | 4.279589 | 4.743679 | 5.027896 | 4.742018 | 4.903665 | 4.503243 | 4.612677 | 4.613795  | 4.501252 | 4.364452 | 4.705774 | 0.0808    | -0.102   | 0.0505   | 0.006546 | 1.456903 | 13 |
| 9928_at   | YLR393W | ATP10  | 3.84601  | 3.572329 | 3.137101 | 3.273616 | 3.233121 | 3.468943 | 3.687507 | 3.410869 | 4.260392 | 3.664586 | 3.97969  |          |           |          |          |          |           |          |          |          |          |    |

|           |                |          |          |          |          |          |          |          |          |          |          |          |          |          |          |          |          |          |          |          |          |          |    |
|-----------|----------------|----------|----------|----------|----------|----------|----------|----------|----------|----------|----------|----------|----------|----------|----------|----------|----------|----------|----------|----------|----------|----------|----|
| 9960_at   | YLR379W        | 4.03906  | 3.701341 | 4.834244 | 3.710139 | 3.946431 | 3.776665 | 4.109959 | 3.753177 | 3.618457 | 4.050907 | 4.040526 | 3.53949  | 3.584815 | 3.578223 | 3.454642 | 3.786727 | -0.143   | 0.018    | 0.109    | 0.012937 | 1.461731 | 16 |
| 9961_at   | YLR380W CSR1   | 8.439724 | 8.459767 | 8.897542 | 8.128764 | 8.158704 | 8.481158 | 7.783223 | 7.317016 | 7.962203 | 7.84723  | 7.551269 | 8.037084 | 7.345568 | 7.925537 | 7.692595 | 7.780631 | -0.241   | 0.0973   | 0.00348  | 0.000621 | 1.892819 | 16 |
| 9962_at   | YLR381W CTF3   | 3.627467 | 3.644017 | 4.372893 | 3.574988 | 3.562713 | 3.498735 | 3.48099  | 3.30179  | 3.036334 | 3.101789 | 3.30705  | 3.384169 | 3.436426 | 3.659209 | 3.47389  | 3.267557 | -0.0964  | 0.121    | 0.0085   | 0.00135  | 1.563219 | 14 |
| 9963_at   | YLR382C NAM2   | 6.392592 | 6.271178 | 6.521325 | 7.281994 | 7.247981 | 7.287782 | 7.504648 | 7.202845 | 7.316218 | 7.338367 | 7.241349 | 7.804043 | 6.637654 | 7.088806 | 6.634243 | 7.499786 | 0.0938   | -0.247   | 1.06E-05 | 4.97E-06 | 2.113287 | 12 |
| 9964_at   | YLR340W RPO0   | 12.61704 | 12.61604 | 12.62837 | 12.23263 | 12.28932 | 12.32036 | 11.78947 | 11.94614 | 12.03769 | 11.57402 | 11.46388 | 11.56261 | 11.08108 | 11.1976  | 10.91829 | 11.73877 | -0.419   | 0.0315   | 1.87E-09 | 1.46E-08 | 3.040164 | 16 |
| 9965_at   | YLR341W SPO77  | 3.451569 | 3.393313 | 4.871371 | 3.257362 | 3.339907 | 3.439198 | 3.602573 | 3.243339 | 3.180994 | 3.304383 | 3.411139 | 3.263474 | 3.157546 | 3.444387 | 3.101005 | 3.253064 | -0.152   | 0.0834   | 0.106    | 0.012718 | 1.562323 | 16 |
| 9966_at   | YLR342W FKS1   | 10.45118 | 10.37498 | 9.788041 | 10.60651 | 10.51084 | 10.30303 | 10.53431 | 10.63179 | 10.88709 | 10.75254 | 10.84837 | 11.00614 | 10.548   | 10.43886 | 10.60433 | 10.77026 | 0.102    | -0.113   | 0.00537  | 0.000906 | 1.548289 | 13 |
| 9967_at   | YLR343W GAS2   | 4.333815 | 4.18551  | 5.054584 | 4.841756 | 5.042538 | 4.986578 | 5.37622  | 5.055785 | 4.804446 | 5.386093 | 5.011939 | 5.391461 | 6.50178  | 5.577457 | 6.189659 | 5.224316 | 0.388    | 0.0249   | 0.000202 | 5.46E-05 | 2.796923 | 7  |
| 9968_s_at | YLR344W RPL26A | 12.59086 | 12.70128 | 12.91244 | 12.55972 | 12.6497  | 12.76852 | 12.36037 | 12.12963 | 12.18686 | 12.00661 | 11.67731 | 11.74976 | 11.08178 | 11.21336 | 11.11037 | 12.07483 | -0.441   | -0.0335  | 9.58E-08 | 1.67E-07 | 3.218277 | 16 |
| 9969_at   | YLR345W        | 8.131172 | 8.22874  | 8.241346 | 8.916959 | 8.882798 | 8.474891 | 9.108626 | 8.666153 | 8.878214 | 9.189416 | 9.293837 | 8.976913 | 8.531369 | 8.850879 | 8.34898  | 9.0596   | 0.112    | -0.185   | 0.000147 | 4.18E-05 | 1.873388 | 12 |
| 9970_at   | YLR346C        | 6.976212 | 6.534119 | 7.208186 | 6.890187 | 7.121323 | 6.479353 | 7.075663 | 6.54877  | 7.221222 | 7.627523 | 7.537555 | 7.675289 | 8.205776 | 7.956349 | 8.785801 | 7.243523 | 0.402    | 0.0966   | 9.66E-05 | 2.97E-05 | 2.90548  | 7  |
| 9971_at   | YLR347C KAP95  | 7.524619 | 7.255137 | 6.46053  | 7.007429 | 6.937591 | 6.635554 | 6.801603 | 6.817102 | 6.871946 | 5.832614 | 6.815302 | 6.719839 | 6.908702 | 7.001774 | 7.130841 | 6.639251 | -0.0478  | 0.115    | 0.166    | 0.018957 | 1.424383 | 13 |
| 9972_at   | YLR348C DIC1   | 10.76581 | 10.39671 | 10.73018 | 10.09793 | 10.32228 | 10.05829 | 9.996786 | 9.965652 | 9.76241  | 9.916355 | 9.326903 | 9.267412 | 10.59585 | 9.780283 | 9.69889  | 9.700251 | -0.187   | 0.176    | 0.00228  | 0.000432 | 2.067551 | 14 |
| 9973_at   | YLR349W        | 6.041786 | 5.697466 | 6.285472 | 5.658431 | 5.854863 | 5.698919 | 5.51933  | 5.599092 | 5.615133 | 5.184716 | 5.426202 | 5.070366 | 5.479579 | 5.616175 | 5.339559 | 5.404533 | -0.162   | 0.0957   | 0.000831 | 0.000181 | 1.636716 | 14 |
| 9974_at   | YLR350W ORM2   | 11.00446 | 10.50639 | 10.25165 | 10.90626 | 11.18408 | 10.80739 | 11.05325 | 11.26867 | 10.98789 | 10.84074 | 11.28521 | 11.45551 | 11.6596  | 11.83297 | 11.7897  | 11.18982 | 0.288    | -0.00261 | 0.000251 | 6.57E-05 | 2.148057 | 7  |
| 9975_at   | YLR351C NIT3   | 8.111448 | 8.240982 | 8.455545 | 7.825121 | 7.848677 | 7.756382 | 7.649285 | 7.48941  | 7.492321 | 7.116287 | 7.209854 | 7.399746 | 6.33758  | 6.530995 | 6.46057  | 7.362246 | -0.469   | -0.00176 | 1.24E-09 | 1.13E-08 | 3.463119 | 16 |
| 9976_at   | YLR352W        | 6.152161 | 6.365034 | 6.442989 | 6.581562 | 6.450982 | 6.435816 | 6.715244 | 6.568683 | 6.508733 | 6.365695 | 6.674562 | 6.877359 | 6.699227 | 6.656985 | 6.638223 | 6.625235 | 0.0892   | -0.0367  | 0.0137   | 0.002047 | 1.266637 | 13 |
| 9977_at   | YLR353W BUD8   | 6.358241 | 6.581099 | 6.904151 | 6.346935 | 6.23014  | 6.180062 | 6.261712 | 6.218053 | 5.909834 | 5.93172  | 6.149321 | 6.187603 | 6.289766 | 6.265053 | 5.886861 | 6.07893  | -0.116   | 0.0822   | 0.00563  | 0.000945 | 1.470142 | 16 |
| 9978_at   | YLR354C TAL1   | 9.844822 | 10.33709 | 10.58634 | 9.947495 | 9.855571 | 10.34322 | 9.676419 | 9.226184 | 9.993387 | 8.796381 | 8.900657 | 9.672113 | 7.987799 | 8.325669 | 8.645506 | 9.413052 | -0.526   | -0.0301  | 3.08E-05 | 1.16E-05 | 4.034662 | 18 |
| 9979_at   | YLR355C ILV5   | 10.99059 | 11.00909 | 10.65977 | 10.68021 | 10.60467 | 10.36556 | 10.55471 | 10.33508 | 10.90953 | 9.840669 | 10.19533 | 10.13213 | 9.881078 | 8.922096 | 8.693886 | 10.26687 | -0.52    | -0.109   | 3.52E-08 | 8.67E-08 | 3.96778  | 18 |
| 9980_at   | YLR356W        | 6.716672 | 6.584855 | 7.37914  | 7.450399 | 7.037582 | 7.645737 | 7.287701 | 7.102256 | 7.542826 | 7.077973 | 7.27212  | 7.222388 | 6.143936 | 8.856631 | 6.736959 | 7.397517 | -0.0819  | -0.18    | 0.00785  | 0.00126  | 1.741261 | 12 |
| 9981_at   | YLR358C        | 6.037163 | 6.147116 | 6.443764 | 5.480375 | 5.642866 | 5.741397 | 5.857133 | 5.42273  | 5.519151 | 5.858004 | 5.791443 | 5.115004 | 5.830955 | 6.054938 | 5.915607 | 5.519849 | -0.0583  | 0.149    | 0.00536  | 0.000904 | 1.574476 | 13 |
| 9982_at   | YLR357W RSC2   | 8.956188 | 9.026492 | 8.94197  | 8.790927 | 8.950269 | 8.806678 | 9.025988 | 9.059677 | 8.841208 | 9.313873 | 9.357817 | 8.512543 | 8.824653 | 9.217533 | 8.512568 | 8.954318 | -0.00712 | -0.0154  | 0.933    | 0.089301 | 1.048768 | 13 |
| 9983_at   | YLR359W ADE13  | 10.58987 | 10.60725 | 10.08962 | 9.654662 | 9.797421 | 9.570095 | 9.122022 | 8.830536 | 8.906768 | 8.484906 | 8.118285 | 7.99076  | 7.947328 | 8.160247 | 7.941315 | 8.599239 | -0.671   | 0.178    | 9.04E-08 | 1.62E-07 | 5.914823 | 18 |
| 9984_at   | YLR360W VPS38  | 4.659975 | 4.838069 | 4.417779 | 5.057942 | 5.084365 | 5.036012 | 4.893122 | 4.839019 | 4.6947   | 4.984529 | 4.754112 | 4.749735 | 4.442944 | 4.57636  | 4.763396 | 4.91296  | -0.0301  | -0.077   | 0.0344   | 0.004652 | 1.265953 | 13 |
| 9985_at   | YLR361C DCR2   | 5.705939 | 5.296574 | 4.829536 | 5.422347 | 5.326436 | 5.611999 | 5.930047 | 5.758635 | 5.657773 | 5.710379 | 5.773983 | 5.512919 | 5.156188 | 5.642656 | 5.074361 | 5.696187 | 0.00908  | -0.115   | 0.0553   | 0.0071   | 1.340917 | 12 |
| 9986_at   | YLR317W        | 6.774244 | 6.598454 | 6.833568 | 6.902905 | 6.942308 | 6.745805 | 6.832702 | 6.734013 | 6.67047  | 6.658512 | 6.983378 | 7.21432  | 6.317226 | 6.962526 | 6.383532 | 6.870692 | -0.0362  | -0.064   | 0.144    | 0.016695 | 1.233079 | 13 |
| 9987_at   | YLR318W EST2   | 3.093303 | 3.298782 | 3.984966 | 3.463293 | 3.46813  | 3.044522 | 3.74641  | 3.351022 | 3.210115 | 3.460523 | 3.201613 | 3.836425 | 3.127182 | 3.163937 | 2.979158 | 3.421442 | -0.0731  | -0.0436  | 0.306    | 0.032688 | 1.256628 | 13 |
| 9988_at   | YLR319C BUD6   | 6.001974 | 5.776686 | 5.306515 | 5.357423 | 5.252822 | 4.638761 | 5.422135 | 5.547775 | 5.018774 | 4.939462 | 5.170882 | 4.913566 | 5.214198 | 4.990267 | 4.560552 | 5.05186  | -0.188   | 0.0661   | 0.0244   | 0.003424 | 1.646847 | 16 |
| 9989_at   | YLR320W MMS22  | 4.999096 | 5.221452 | 5.231849 | 5.212225 | 5.115872 | 4.688644 | 5.280963 | 4.986368 | 4.644531 | 4.854245 | 5.058752 | 5.182748 | 5.822522 | 5.713828 | 5.285588 | 4.994879 | 0.114    | 0.106    | 0.00609  | 0.001013 | 1.553273 | 13 |
| 9990_at   | YLR321C SFH1   | 6.517022 | 6.438489 | 6.684943 | 6.287673 | 6.201017 | 5.90451  | 5.960548 | 6.016566 | 5.997348 | 6.169045 | 6.124142 | 6.0078   | 6.134267 | 5.703642 | 5.66812  | 5.998859 | -0.16    | 0.0503   | 0.00246  | 0.00046  | 1.530284 | 16 |
| 9991_at   | YLR322W VPS65  | 3.439334 | 3.146181 | 4.13655  | 3.176481 | 3.219005 | 3.394737 | 3.190903 | 3.081792 | 3.155887 | 2.983977 | 3.193779 | 2.925725 | 2.960057 | 3.033912 | 2.861048 | 3.064533 | -0.159   | 0.0542   | 0.0102   | 0.001579 | 1.526226 | 16 |
| 9992_at   | YLR323C CWC24  | 6.045956 | 5.847614 | 5.912097 | 5.633027 | 5.753431 | 5.472441 | 6.382554 | 6.249165 | 5.948414 | 6.170675 | 6.850328 | 5.887006 | 6.062029 | 6.133775 | 5.934474 | 6.186406 | 0.0904   | -0.0645  | 0.328    | 0.034805 | 1.352007 | 13 |
| 9993_at   | YLR324W PEX30  | 5.189985 | 5.367111 | 6.207648 | 5.394011 | 5.198835 | 5.541973 | 5.687733 | 5.293388 | 5.581259 | 5.624606 | 5.593327 | 6.001122 | 5.289312 | 6.285163 | 5.682194 | 5.572047 | 0.0705   | 0.0229   | 0.55     | 0.055425 | 1.205462 | 13 |
| 9994_at   | YLR325C RPL38  | 11.66112 | 11.89677 | 12.06445 | 11.25583 | 11.67062 | 11.58717 | 11.29801 | 10.8943  | 10.72773 | 10.72191 | 10.40394 | 10.28528 | 9.158058 | 10.02262 | 9.477309 | 10.74924 | -0.621   | -0.00576 | 6.89E-07 | 6.38E-07 | 5.188818 | 18 |
| 9995_at   | YLR326W        | 7.487705 | 7.431059 | 7.411772 | 7.974708 | 7.919833 | 7.628845 | 8.233611 | 8.38694  | 7.819063 | 8.615842 | 8.168403 | 7.732542 | 7.433393 | 7.51745  | 7.058531 | 8.152587 | -0.0114  | -0.212   | 0.00131  | 0.000269 | 1.689326 | 12 |
| 9996_at   | YLR327C TMA10  | 7.753011 | 7.585662 | 7.551558 | 9.323384 | 9.503225 | 8.994267 | 9.183734 | 9.749075 | 9.304377 | 9.605266 | 8.92055  | 9.118769 | 9.058624 | 9.329717 | 9.264032 | 9.535155 | 0.341    | -0.295   | 0.000124 | 3.63E-05 | 3.531257 | 10 |
| 9997_at   | YLR328W NMA1   | 5.81586  | 5.832299 | 5.274341 | 6.433086 | 6.256918 | 6.027947 | 6.043286 | 6.275429 | 6.149225 | 5.560177 | 5.686174 | 6.116861 | 5.07334  | 5.549873 | 5.245133 | 6.073244 | -0.131   | -0.161   | 0.00221  | 0.000419 | 1.815874 | 15 |
| 9998_at   | YLR329W REC102 | 4.535934 | 4.351578 | 4.051741 | 4.341346 | 4.225671 | 4.644216 | 4.165596 | 4.38364  | 4.406896 | 4.24681  | 4.031597 | 4.456424 | 4.580431 | 4.678848 | 4.592019 | 4.317576 | 0.059    | 0.0432   | 0.126    | 0.014787 | 1.223108 | 13 |
| 9999_at   | YLR330W CHS5   | 8.047646 | 8.131532 | 7.997354 | 8.061308 | 8.025451 | 7.484779 | 8.153786 | 8.18265  | 7.605757 | 8.64998  | 7.747051 | 7.991311 | 8.382229 | 8.492729 | 8.0349   | 8.005557 | 0.0818   | 0.0452   | 0.254    | 0.027665 | 1.282196 | 13 |
